# Supplementary material for: Preparative capillary electrophoresis (CE) fractionation of protein digests improves protein and peptide identification in bottom-up proteomics
Source: Royal Society of Chemistry journal article supplement (doi:10.1039/d1ay02145a), 2022-01-01
Supplement: d1ay02145a2.xlsx [file d1ay02145a2.xlsx]

## Sheet: SI_CCM_peptides
Replicate A: FRACTIONS	Replicate A: PLUG	Replicate A: RAW	Replicate B: FRACTIONS	Replicate B: PLUG	Replicate B: RAW
ALFSSNLDPSLVEQVFLDK	ALFSSNLDPSLVEQVFLDK	ALFSSNLDPSLVEQVFLDK	DSLYVNGFTHR	DSLYVNGFTQR	DSLYVNGFTQR
DGAATGMDAVCLYHPNPK	DSLYVNGFTQR	DSLYVNGFTQR	DSLYVNGFTQR	ELGPYTLDR	ELGPYTLDR
DGAATGVDAICTHHLNPQSPGLDR	ELGPYTLDR	ELGPYTLDR	ELGPYTLDR	EQLYWELSK	EQLYWELSK
DGEATGVDAICTHRPDPTGPGLDR	LDPLNPGLDR	EQLYWELSK	ELQGLLKPLFR	LDPLNPGLDR	LDPLNPGLDR
DSLYVNGFTQR	LTNDIEELGPYTLDR	LDPLNPGLDR	EQLYWELSK	LTNDIEELGPYTLDR
ELGPYTLDR	SSVLVDGYSPNR		GIIELGPYLLDR	VAIYEEFLR
EIFPSINTEETNVK	VLQGLLSPIFK		LDPLNPGLDR
EQLYWELSK			LTLLRPEK
LDPLNPGLDR			LTNDIEELGPYTLDR
LTLLRPEK			NIEDALNQLFR
LTNDIEELGPYTLDR			NSLYVNGFTHR
NIEDALNQLFR			QVFHELSQQTHGITR
NSLYVNGFTHR			SSVLVDGYSPNR
QVFHELSQQTHGITR			VAIYEEFLR
SSVLVDGYSPNR			VLQGLLGPIFK
STSVGPLYSGCR			VLQGLLGPMFK
SYFSDCQVSTFR			VLQGLLKPLFK
VAIYEEFLR			VLQGLLMPLFK
VDPIGPGLDR			VLQGLLRPLFK
VLQGLLGPIFK			VLQGLLRPVFK
VLQGLLGPMFK			VLQGLLSPIFK
VLQGLLMPLFK			VLQGLLTPLFK
VLQGLLSPIFK			VLQSLLGPMFK
VLQGLLTPLFK			VLQTLLGPMFK
VLQTLLGPMFK
