# Supplementary material for: Preparative capillary electrophoresis (CE) fractionation of protein digests improves protein and peptide identification in bottom-up proteomics
Source: Royal Society of Chemistry journal article supplement (doi:10.1039/d1ay02145a), 2022-01-01
Supplement: d1ay02145a3.xlsx [file d1ay02145a3.xlsx]

## Sheet: SI_Fractions_repA_peptides_and_
Peptide	-10LgP	Mass	Length	ppm	m/z	z	RT	Area A_Combined_Fractions	Intensity A_Combined_Fractions	Scan	Source File	#Spec	Accession	PTM	AScore	Decoy
AAC(+57.02)AQLNDFLQEYGTQGC(+57.02)QV	37.86	2271.99	20	0.2	758.337	3	24.2438	284000	3200000	4443	20210526_HS_Frac5-1.raw	3		Carbamidomethylation; Carbamidomethylation	C3:Carbamidomethylation:1000.00;C18:Carbamidomethylation:1000.00	FALSE
AADDTWEPFASGK	68.06	1393.62	13	-5.3	697.813	2	18.9188	23500000	288000000	4369	20210526_HS_Frac3-3.raw	23	P02766|TTHY_HUMAN;A0A087WT59|A0A087WT59_HUMAN			FALSE
AADETWEPFASGK	40.7	1407.63	13	-2.6	704.823	2	19.1124	173000	2280000	4435	20210526_HS_Frac3-2.raw	1				FALSE
AAFTE(+21.98)C(+57.02)C(+57.02)QAADK	57.94	1392.54	12	-9.8	697.273	2	5.072	48400000	139000000	1019	20210526_HS_Frac2-1.raw	45	A0A0C4DGB6|A0A0C4DGB6_HUMAN;P02768|ALBU_HUMAN;D6RHD5|D6RHD5_HUMAN;B7WNR0|B7WNR0_HUMAN;H0YA55|H0YA55_HUMAN	Sodium adduct; Carbamidomethylation; Carbamidomethylation	E5:Sodium adduct:73.05;C6:Carbamidomethylation:1000.00;C7:Carbamidomethylation:1000.00	FALSE
AAFTEC(+57.02)C(+57.02)Q(+0.98)AADK	37.86	1371.54	12	8.7	686.787	2	3.4879	635000	2890000	605	20210526_HS_Frac2-1.raw	3	A0A0C4DGB6|A0A0C4DGB6_HUMAN;P02768|ALBU_HUMAN;D6RHD5|D6RHD5_HUMAN;B7WNR0|B7WNR0_HUMAN;H0YA55|H0YA55_HUMAN	Carbamidomethylation; Carbamidomethylation; Deamidation (NQ)	C6:Carbamidomethylation:1000.00;C7:Carbamidomethylation:1000.00	FALSE
AAFTEC(+57.02)C(+57.02)QAADK	67.77	1370.56	12	1.6	686.291	2	12.3861	351000000	1190000000	2690	20210526_HS_Frac2-3.raw	196	A0A0C4DGB6|A0A0C4DGB6_HUMAN;P02768|ALBU_HUMAN;D6RHD5|D6RHD5_HUMAN;B7WNR0|B7WNR0_HUMAN;H0YA55|H0YA55_HUMAN	Carbamidomethylation; Carbamidomethylation	C6:Carbamidomethylation:1000.00;C7:Carbamidomethylation:1000.00	FALSE
AAFTEC(+57.02)C(+57.02)QAADKAAC(+57.02)LLPK	51.66	2123.98	19	2.1	709.005	3	20.6417	1370000	17400000	5445	20210526_HS_Frac2-3.raw	3	A0A0C4DGB6|A0A0C4DGB6_HUMAN;P02768|ALBU_HUMAN;D6RHD5|D6RHD5_HUMAN;B7WNR0|B7WNR0_HUMAN;H0YA55|H0YA55_HUMAN	Carbamidomethylation; Carbamidomethylation; Carbamidomethylation	C6:Carbamidomethylation:1000.00;C7:Carbamidomethylation:1000.00;C15:Carbamidomethylation:1000.00	FALSE
AAISGENAGLVR	59.43	1156.62	12	5.1	579.323	2	10.4156	4420000	12600000	2269	20210526_HS_Frac2-3.raw	4	P19827|ITIH1_HUMAN;F8WAS2|F8WAS2_HUMAN			FALSE
AALTELSLGSAYQAM(+15.99)ILGVDSK	47.41	2253.16	22	3.1	752.064	3	26.0175			6745	20210526_HS_Frac4-1.raw	1	P04114|APOB_HUMAN	Oxidation (M)		FALSE
AAPSVTLFPPSSE(+21.98)ELQANK	52.86	2006.99	19	1.6	670.009	3	22.2725	19700000	89000000	5485	20210526_HS_Frac4-2.raw	11	P0DOY2|IGLC2_HUMAN;P0DOY3|IGLC3_HUMAN	Sodium adduct	E13:Sodium adduct:11.06	FALSE
AAPSVTLFPPSSEELQANK	61.06	1985.01	19	2.7	993.519	2	22.6598	183000000	1080000000	5763	20210526_HS_Frac3-3.raw	49	P0DOY2|IGLC2_HUMAN;P0DOY3|IGLC3_HUMAN			FALSE
AAQVTIQSSGTFSSK	72.1	1510.76	15	3.4	756.394	2	15.5755	18400000	98500000	3359	20210526_HS_Frac3-3.raw	32	P01023|A2MG_HUMAN			FALSE
AATVGSLAGQPLQER	56.45	1496.79	15	3.2	749.41	2	16.9744	526000	5130000	3712	20210526_HS_Frac3-2.raw	3	P02649|APOE_HUMAN;H0Y7L5|H0Y7L5_HUMAN			FALSE
AAVYHHFISDGVR	55.94	1470.74	13	1.6	491.254	3	15.5776	1740000	7950000	2858	20210526_HS_Frac1-2.raw	3	P01024|CO3_HUMAN			FALSE
AC(+57.02)EPGVDYVYK	52.95	1299.58	11	-1.1	650.799	2	15.4019	14200000	76200000	3242	20210526_HS_Frac3-3.raw	9	P01024|CO3_HUMAN;M0QXZ3|M0QXZ3_HUMAN	Carbamidomethylation	C2:Carbamidomethylation:1000.00	FALSE
ADDKETC(+57.02)FAE(+21.98)EGK	64.66	1520.61	13	-9.2	761.307	2	5.1097	4330000	15400000	950	20210526_HS_Frac2-3.raw	16	A0A087WWT3|A0A087WWT3_HUMAN;P02768|ALBU_HUMAN;C9JKR2|C9JKR2_HUMAN;D6RHD5|D6RHD5_HUMAN;B7WNR0|B7WNR0_HUMAN;H0YA55|H0YA55_HUMAN	Carbamidomethylation; Sodium adduct	C7:Carbamidomethylation:1000.00;E10:Sodium adduct:33.98	FALSE
ADDKETC(+57.02)FAEEGK	65.99	1498.62	13	-5.7	500.548	3	5.2696	71300000	165000000	860	20210526_HS_Frac2-3.raw	55	A0A087WWT3|A0A087WWT3_HUMAN;P02768|ALBU_HUMAN;C9JKR2|C9JKR2_HUMAN;D6RHD5|D6RHD5_HUMAN;B7WNR0|B7WNR0_HUMAN;H0YA55|H0YA55_HUMAN	Carbamidomethylation	C7:Carbamidomethylation:1000.00	FALSE
ADDKETC(+57.02)FAEEGKK	50.42	1626.72	14	-2.7	543.248	3	4.699	23700000	30500000	790	20210526_HS_Frac2-3.raw	27	A0A087WWT3|A0A087WWT3_HUMAN;P02768|ALBU_HUMAN;C9JKR2|C9JKR2_HUMAN;D6RHD5|D6RHD5_HUMAN;B7WNR0|B7WNR0_HUMAN;H0YA55|H0YA55_HUMAN	Carbamidomethylation	C7:Carbamidomethylation:1000.00	FALSE
ADGSYAAWLSR	51.59	1195.56	11	-0.1	598.791	2	19.1564	940000	10800000	4863	20210526_HS_Frac2-2.raw	6				FALSE
ADLFYDVEALDLESPK	60.28	1823.88	16	-0.2	912.952	2	26.6622	717000	9110000	7021	20210526_HS_Frac3-2.raw	9	P04196|HRG_HUMAN			FALSE
ADLSGITGAR	45.03	959.504	10	-1.9	480.76	2	7.1255	27700000	89800000	1619	20210526_HS_Frac2-1.raw	19	G3V3A0|G3V3A0_HUMAN;P01011|AACT_HUMAN			FALSE
ADRDQYELLC(+57.02)LD(+21.98)NTR	60.76	1902.85	15	0.3	635.294	3	19.9115	2540000	27000000	5181	20210526_HS_Frac2-3.raw	3	C9JVG0|C9JVG0_HUMAN;P02787|TRFE_HUMAN	Carbamidomethylation; Sodium adduct	C10:Carbamidomethylation:1000.00;D12:Sodium adduct:11.47	FALSE
ADRDQYELLC(+57.02)LDNTR	68.55	1880.87	15	1.1	941.446	2	20.0146	61200000	541000000	5153	20210526_HS_Frac2-1.raw	23	C9JVG0|C9JVG0_HUMAN;P02787|TRFE_HUMAN	Carbamidomethylation	C10:Carbamidomethylation:1000.00	FALSE
ADSVVDLLSYNVQGSGETTYDHK	61.81	2497.16	23	4.5	833.401	3	23.2932	918000	12400000	5986	20210526_HS_Frac3-2.raw	3	P04114|APOB_HUMAN			FALSE
ADVQAHGEGQEFSITC(+57.02)LVDEEEM(+15.99)K	68.93	2737.18	24	5.6	913.41	3	23.3271	623000	8570000	5999	20210526_HS_Frac3-2.raw	5	P19827|ITIH1_HUMAN;H7C0N0|H7C0N0_HUMAN	Carbamidomethylation; Oxidation (M)	C16:Carbamidomethylation:1000.00	FALSE
ADVQAHGEGQEFSITC(+57.02)LVDEEEM(+15.99)KK	69.39	2865.28	25	0.8	717.33	4	22.7966	939000	14700000	6240	20210526_HS_Frac2-1.raw	3	P19827|ITIH1_HUMAN;H7C0N0|H7C0N0_HUMAN	Carbamidomethylation; Oxidation (M)	C16:Carbamidomethylation:1000.00	FALSE
AEAQAQYSAAVAK	51.65	1306.65	13	-4.9	654.332	2	6.1886	206000	1720000	1196	20210526_HS_Frac3-3.raw	4	Q14624|ITIH4_HUMAN;B7ZKJ8|B7ZKJ8_HUMAN			FALSE
AEATTLHVAPQGTAM(+15.99)AVSTFR	61.07	2174.08	21	1.6	725.705	3	19.3295	1130000	16300000	4939	20210526_HS_Frac2-3.raw	3	P07360|CO8G_HUMAN	Oxidation (M)		FALSE
AEDHFSVIDFNQNIR	59.88	1803.85	15	2.7	602.295	3	22.0002	4260000	52600000	5935	20210526_HS_Frac2-1.raw	7	Q5T985|Q5T985_HUMAN;P19823|ITIH2_HUMAN			FALSE
AEDTALYYC(+57.02)AK	56.3	1303.58	11	3.1	652.799	2	12.9031	82300	377000	2658	20210526_HS_Frac3-3.raw	1		Carbamidomethylation	C9:Carbamidomethylation:1000.00	FALSE
AEDTAVYYC(+57.02)AK	48.96	1289.56	11	-3.4	645.787	2	7.1583	627000	3580000	1504	20210526_HS_Frac3-2.raw	7		Carbamidomethylation	C9:Carbamidomethylation:1000.00	FALSE
AEDTAVYYC(+57.02)AR	55.6	1317.57	11	0.1	659.793	2	13.8802	4860000	12300000	2833	20210526_HS_Frac3-3.raw	10		Carbamidomethylation	C9:Carbamidomethylation:1000.00	FALSE
AEEEHLGILGPQLHADVGDK	58.73	2127.06	20	4.6	710.034	3	20.3876	712000	9870000	5365	20210526_HS_Frac2-3.raw	5	E9PFZ2|E9PFZ2_HUMAN;H7C5R1|H7C5R1_HUMAN;P00450|CERU_HUMAN			FALSE
AEFAE(+21.98)VSK	45.07	901.416	8	-5.4	451.715	2	5.8488	39000000	134000000	1087	20210526_HS_Frac2-3.raw	16	A0A0C4DGB6|A0A0C4DGB6_HUMAN;P02768|ALBU_HUMAN;C9JKR2|C9JKR2_HUMAN;D6RHD5|D6RHD5_HUMAN;B7WNR0|B7WNR0_HUMAN;H0YA55|H0YA55_HUMAN	Sodium adduct	E5:Sodium adduct:54.70	FALSE
AEFAEVSK	49.94	879.434	8	-7	440.723	2	5.8799	246000000	969000000	1485	20210526_HS_Frac2-3.raw	126	A0A0C4DGB6|A0A0C4DGB6_HUMAN;P02768|ALBU_HUMAN;C9JKR2|C9JKR2_HUMAN;D6RHD5|D6RHD5_HUMAN;B7WNR0|B7WNR0_HUMAN;H0YA55|H0YA55_HUMAN			FALSE
AEFAEVSKLVTDLTK	75.35	1649.89	15	1.9	825.955	2	25.6608	3150000	44200000	7243	20210526_HS_Frac2-1.raw	9	A0A0C4DGB6|A0A0C4DGB6_HUMAN;P02768|ALBU_HUMAN;C9JKR2|C9JKR2_HUMAN;D6RHD5|D6RHD5_HUMAN;B7WNR0|B7WNR0_HUMAN;H0YA55|H0YA55_HUMAN			FALSE
AEFQDALEK	49.05	1049.5	9	-0.3	525.761	2	11.584	12000000	52600000	2493	20210526_HS_Frac2-3.raw	18				FALSE
AEM(+15.99)ADQAAAWLTR	62.5	1448.67	13	-1.3	725.345	2	18.8708	3950000	33100000	4381	20210526_HS_Frac3-3.raw	12		Oxidation (M)		FALSE
AEPLAFTFSHDYK	57.91	1524.72	13	4	763.376	2	21.147	2020000	22000000	5654	20210526_HS_Frac2-2.raw	5	P04114|APOB_HUMAN			FALSE
AESPEVC(+57.02)FNEESPK	56.83	1621.69	14	2.2	811.858	2	15.803	1830000	13200000	3345	20210526_HS_Frac3-3.raw	4	P43652|AFAM_HUMAN	Carbamidomethylation	C7:Carbamidomethylation:1000.00	FALSE
AFDIC(+57.02)PLVK	51.45	1061.56	9	2.6	531.79	2	21.2183	82600	1480000	5679	20210526_HS_Frac2-2.raw	3	P01031|CO5_HUMAN	Carbamidomethylation	C5:Carbamidomethylation:1000.00	FALSE
AGALNSNDAFVLK	56.4	1318.69	13	-1.6	660.353	2	19.1929	3840000	44200000	4892	20210526_HS_Frac2-3.raw	6	A0A0A0MS51|A0A0A0MS51_HUMAN;P06396|GELS_HUMAN;A0A0A0MT01|A0A0A0MT01_HUMAN			FALSE
AGDFLEANYM(+15.99)NLQR	59.7	1656.76	14	2.2	829.39	2	20.0181	28100000	246000000	4608	20210526_HS_Frac4-1.raw	26	M0R0Q9|M0R0Q9_HUMAN;P01024|CO3_HUMAN	Oxidation (M)		FALSE
AGEQVTYTC(+57.02)ATYYK	63.03	1653.73	14	0.5	827.878	2	15.7834	2550000	16100000	3351	20210526_HS_Frac3-3.raw	3	P08603|CFAH_HUMAN	Carbamidomethylation	C9:Carbamidomethylation:1000.00	FALSE
AGEVQEPELR	43.77	1126.56	10	4.2	564.293	2	7.6583	4530000	16700000	1639	20210526_HS_Frac3-3.raw	8	P25311|ZA2G_HUMAN			FALSE
AGGSWDLAVQER	40.95	1287.62	12	0.4	644.821	2	17.6494	174000	1760000	4295	20210526_HS_Frac2-3.raw	1	P22792|CPN2_HUMAN			FALSE
AGVETTTPSK	43.05	989.503	10	-7.3	495.757	2	4.2371	417000	401000	716	20210526_HS_Frac2-2.raw	2	P0DOY2|IGLC2_HUMAN;P0DOY3|IGLC3_HUMAN			FALSE
AIDEDC(+57.02)SQYEPIPGSQK	36.2	1935.85	17	0	968.937	2	16.0007	143000	1660000	3433	20210526_HS_Frac3-3.raw	2	P07357|CO8A_HUMAN	Carbamidomethylation	C6:Carbamidomethylation:1000.00	FALSE
AIEDYINEFSVR	65.23	1454.7	12	-2.8	728.36	2	23.0593	951000	16200000	5895	20210526_HS_Frac3-3.raw	5	P02748|CO9_HUMAN			FALSE
AIGYLN(+0.98)TGYQR	51.83	1255.62	11	-0.6	628.819	2	15.9774	3330000	18400000	3388	20210526_HS_Frac3-3.raw	8	P01023|A2MG_HUMAN	Deamidation (NQ)	N6:Deamidation (NQ):34.30	FALSE
AIGYLNTGYQR	56.49	1254.64	11	-3.7	628.326	2	16.1794	39200000	278000000	3759	20210526_HS_Frac2-3.raw	21	P01023|A2MG_HUMAN			FALSE
AIPVTQYLK	42.93	1031.6	9	1.3	516.81	2	19.2219			4865	20210526_HS_Frac2-1.raw	1	P43652|AFAM_HUMAN			FALSE
AKLPDATPTELAK	48.96	1353.75	13	-2.5	452.258	3	15.7455	437000	4280000	3639	20210526_HS_Frac2-3.raw	5	P02774|VTDB_HUMAN;D6RF35|D6RF35_HUMAN			FALSE
AKPALEDLR	40.69	1011.57	9	5.3	506.796	2	9.0314	5170000	14600000	1691	20210526_HS_Frac1-3.raw	7	F8W696|F8W696_HUMAN;P02647|APOA1_HUMAN			FALSE
ALDQYLM(+15.99)EFNAC(+57.02)R	50.69	1645.72	13	3.9	823.875	2	22.4302	194000	2510000	5675	20210526_HS_Frac3-3.raw	3	P07357|CO8A_HUMAN	Oxidation (M); Carbamidomethylation	C12:Carbamidomethylation:1000.00	FALSE
ALEEANADLEVK	51.24	1300.65	12	-0.1	651.335	2	15.2386	229000	1300000	3178	20210526_HS_Frac3-3.raw	3				FALSE
ALEESNYELEGK	60.15	1380.64	12	-3.2	691.328	2	12.8614	2750000	12800000	2739	20210526_HS_Frac3-3.raw	9	#CONTAM#cont|000133|;#CONTAM#cont|000131|;P13645|K1C10_HUMAN;#CONTAM#cont|000129|;#CONTAM#cont|000136|;#CONTAM#cont|000122|			FALSE
ALEILQ(+0.98)EEDLIDEDDIPVR	52.77	2225.09	19	5.8	742.713	3	26.4762			6898	20210526_HS_Frac4-1.raw	2		Deamidation (NQ)		FALSE
ALEILQEE(+21.98)DLIDEDDIPVR	61.15	2246.09	19	3.1	749.71	3	26.3813	49900	816000	6923	20210526_HS_Frac4-2.raw	1		Sodium adduct	E8:Sodium adduct:0.00	FALSE
ALEILQEED(+21.98)LIDEDDIPVR	60.79	2246.09	19	-1	749.707	3	26.5004	59500	921000	6904	20210526_HS_Frac4-1.raw	1		Sodium adduct	D9:Sodium adduct:0.00	FALSE
ALEILQEEDLIDEDDIPVR	70.04	2224.11	19	0.9	1113.07	2	26.4177	1490000	17100000	6833	20210526_HS_Frac4-3.raw	6				FALSE
ALEQDLPVNIK	42.49	1238.69	11	-2.3	620.351	2	19.6694	22200	363000	4647	20210526_HS_Frac3-1.raw	1				FALSE
ALEWLAR	35.48	857.476	7	-1.8	429.746	2	18.9551	662000	3510000	4805	20210526_HS_Frac2-3.raw	2				FALSE
ALLAFQESK	40.78	1005.55	9	0.8	503.784	2	16.8199	2540000	18100000	3945	20210526_HS_Frac2-1.raw	3				FALSE
ALLAYAFALAGNQDK	63.94	1564.83	15	5.2	783.427	2	25.7179	614000	6400000	6716	20210526_HS_Frac3-3.raw	3	P01023|A2MG_HUMAN			FALSE
ALPAPIEK	39.95	837.496	8	-0.2	419.757	2	17.5543	62300000	482000000	4429	20210526_HS_Frac2-3.raw	41	A0A4W9A917|A0A4W9A917_HUMAN;P01857|IGHG1_HUMAN;P01860|IGHG3_HUMAN;A0A0A0MS08|A0A0A0MS08_HUMAN;A0A0A0MS07|A0A0A0MS07_HUMAN;A0A286YES1|A0A286YES1_HUMAN			FALSE
ALQDQLVLVAAK	58.03	1267.75	12	2.9	634.886	2	20.7905	3420000	36900000	5075	20210526_HS_Frac3-3.raw	7	P01019|ANGT_HUMAN			FALSE
ALVEGVDQLFTDYQIK	41.41	1837.95	16	4	919.987	2	26.5559	157000	2100000	6982	20210526_HS_Frac3-2.raw	3	P01031|CO5_HUMAN			FALSE
ALVEQGFTVPEIK	69.85	1429.78	13	-6.8	715.896	2	22.6553	6520000	59300000	5752	20210526_HS_Frac3-3.raw	9	P04114|APOB_HUMAN			FALSE
ALYLQYTDETFR	57.89	1518.74	12	-1.9	760.376	2	21.6892	3640000	34400000	5443	20210526_HS_Frac3-3.raw	11	E9PFZ2|E9PFZ2_HUMAN;P00450|CERU_HUMAN			FALSE
ALYWVN(+0.98)GQVPDGVSK	63.19	1632.81	15	1.4	817.419	2	21.4499	2300000	21200000	5298	20210526_HS_Frac3-2.raw	5	A8MUN2|A8MUN2_HUMAN;P04114|APOB_HUMAN	Deamidation (NQ)	N6:Deamidation (NQ):8.22	FALSE
ALYYDLISSPDIHGTYK	41.47	1954.97	17	2.6	652.667	3	23.1808	180000	2980000	6386	20210526_HS_Frac2-1.raw	1	I3L4Z0|I3L4Z0_HUMAN;P36955|PEDF_HUMAN			FALSE
AM(+15.99)AVEDIISR	53.17	1119.56	10	2.9	560.791	2	15.1594	2150000	8510000	3431	20210526_HS_Frac2-3.raw	5	P07357|CO8A_HUMAN	Oxidation (M)		FALSE
ANPTVTLFPPSSE(+21.98)ELQANK	39.89	2064.01	19	0.7	689.015	3	22.2948	1730000	13100000	5391	20210526_HS_Frac4-3.raw	3	A0A0B4J231|A0A0B4J231_HUMAN;B9A064|IGLL5_HUMAN	Sodium adduct	E13:Sodium adduct:17.01	FALSE
ANPTVTLFPPSSEELQANK	50.86	2042.03	19	3	1022.03	2	22.8071	8050000	21400000	5650	20210526_HS_Frac4-1.raw	13	A0A0B4J231|A0A0B4J231_HUMAN;B9A064|IGLL5_HUMAN			FALSE
ANTVQE(+21.98)ATFQM(+15.99)ELPK	51.93	1743.81	15	3.8	582.282	3	18.7995	720000	7090000	4359	20210526_HS_Frac3-3.raw	3	Q14624|ITIH4_HUMAN;B7ZKJ8|B7ZKJ8_HUMAN	Sodium adduct; Oxidation (M)	E6:Sodium adduct:38.00;M11:Oxidation (M):1000.00	FALSE
ANTVQEATFQM(+15.99)ELPK	62.14	1721.83	15	3.6	861.928	2	18.7995	6450000	62000000	4341	20210526_HS_Frac3-3.raw	5	Q14624|ITIH4_HUMAN;B7ZKJ8|B7ZKJ8_HUMAN	Oxidation (M)		FALSE
APDVFPIISGC(+57.02)R	50	1330.67	12	3.8	666.347	2	22.2792	258000	3280000	5619	20210526_HS_Frac3-2.raw	2	A0A0A0MS09|A0A0A0MS09_HUMAN;P01880|IGHD_HUMAN	Carbamidomethylation	C11:Carbamidomethylation:1000.00	FALSE
APSTWLTAYVVK	60.74	1334.72	12	2.6	668.373	2	23.72	2730000	26500000	6126	20210526_HS_Frac3-3.raw	5	P01024|CO3_HUMAN			FALSE
AQLGDLPWQVAIK	49.24	1437.8	13	2.7	719.911	2	25.1758	788000	10100000	7089	20210526_HS_Frac2-3.raw	6	G3XAM2|G3XAM2_HUMAN;A0A2R8Y3M9|A0A2R8Y3M9_HUMAN;E7ETH0|E7ETH0_HUMAN;P05156|CFAI_HUMAN			FALSE
AQPVQVAEGSEPDGFWEALGGK	68.32	2271.08	22	2.6	1136.55	2	24.9868	784000	9240000	6420	20210526_HS_Frac4-1.raw	6	A0A0A0MS51|A0A0A0MS51_HUMAN;P06396|GELS_HUMAN;A0A0A0MT01|A0A0A0MT01_HUMAN			FALSE
AQTTVTC(+57.02)M(+15.99)EN(+0.98)GWSPTPR	64.71	1951.84	17	-0.8	976.93	2	15.9836	646000	5320000	3409	20210526_HS_Frac3-3.raw	4	A0A0D9SG88|A0A0D9SG88_HUMAN;P08603|CFAH_HUMAN;Q5TFM2|Q5TFM2_HUMAN	Carbamidomethylation; Oxidation (M); Deamidation (NQ)	C7:Carbamidomethylation:1000.00;M8:Oxidation (M):1000.00;N10:Deamidation (NQ):32.94	FALSE
AREDIFM(+15.99)ETLK	52.25	1367.68	11	3.8	456.901	3	18.133	1430000	11000000	3493	20210526_HS_Frac1-3.raw	8	C9JEV0|C9JEV0_HUMAN;P25311|ZA2G_HUMAN	Oxidation (M)		FALSE
ASGSLPYTQTLQDHLNSLK	65.53	2072.05	19	-0.6	691.694	3	22.3046	1120000	19500000	6086	20210526_HS_Frac2-3.raw	3	P04114|APOB_HUMAN			FALSE
ASQSVSSNLAWYQQKPGQAPR	70.2	2302.15	21	-1.4	768.391	3	18.5888	459000	8240000	4652	20210526_HS_Frac2-3.raw	3				FALSE
ASQSVSSSYLAWYQQKPGQAPR	48.06	2438.2	22	1.2	813.744	3	20.8142	103000	1920000	5529	20210526_HS_Frac2-3.raw	3				FALSE
ASSIIDELFQDR	54.13	1392.69	12	0	697.354	2	25.5904	3320000	31500000	6673	20210526_HS_Frac3-2.raw	7	H0YLK8|H0YLK8_HUMAN;P10909|CLUS_HUMAN;H0YC35|H0YC35_HUMAN;E7ERK6|E7ERK6_HUMAN			FALSE
ASYLDC(+57.02)IR	52.28	996.47	8	-0.7	499.244	2	15.3488	43200000	236000000	3535	20210526_HS_Frac2-3.raw	17	F8WCI6|F8WCI6_HUMAN;P02787|TRFE_HUMAN;F8WEK9|F8WEK9_HUMAN;C9JB55|C9JB55_HUMAN	Carbamidomethylation	C6:Carbamidomethylation:1000.00	FALSE
ATFGC(+57.02)HDGYSLDGPEEIEC(+57.02)TK	77.97	2384.99	21	-0.8	796.006	3	19.3295	2750000	32400000	4936	20210526_HS_Frac2-3.raw	3	J3QLI0|J3QLI0_HUMAN;J3KS17|J3KS17_HUMAN;P02749|APOH_HUMAN	Carbamidomethylation; Carbamidomethylation	C5:Carbamidomethylation:1000.00;C19:Carbamidomethylation:1000.00	FALSE
ATFQTPDFIVPLTDLR	52.52	1832.97	16	1.8	917.496	2	28.7735	1870000	21600000	7512	20210526_HS_Frac4-2.raw	12	P04114|APOB_HUMAN			FALSE
ATFTC(+57.02)FVVGSDLK	53.6	1443.71	13	2.2	722.865	2	22.4678	60200	974000	5682	20210526_HS_Frac3-3.raw	1	A0A0A0MS09|A0A0A0MS09_HUMAN;P01880|IGHD_HUMAN	Carbamidomethylation	C5:Carbamidomethylation:1000.00	FALSE
ATGVLYDYVNK	58.71	1241.63	11	2.8	621.826	2	17.8502	4720000	28700000	4020	20210526_HS_Frac3-3.raw	4	P04114|APOB_HUMAN			FALSE
ATLYALSHAVNNYHK	44.19	1700.86	15	6.4	567.965	3	18.4443	74200	881000	3530	20210526_HS_Frac1-1.raw	1	A8MUN2|A8MUN2_HUMAN;P04114|APOB_HUMAN			FALSE
ATTVTGTPC(+57.02)QDWAAQEPHR	67.5	2124.96	19	1.7	709.333	3	16.5027	1810000	15200000	3894	20210526_HS_Frac2-3.raw	3	P00747|PLMN_HUMAN	Carbamidomethylation	C9:Carbamidomethylation:1000.00	FALSE
ATVLN(+0.98)YLPK	42.32	1018.57	9	0.5	510.294	2	21.4516	1030000	9020000	5731	20210526_HS_Frac2-1.raw	6	P01023|A2MG_HUMAN;P20742|PZP_HUMAN	Deamidation (NQ)		FALSE
ATVLNYLPK	50.82	1017.59	9	-0.5	509.802	2	19.9968	38400000	244000000	5180	20210526_HS_Frac2-3.raw	14	P01023|A2MG_HUMAN;P20742|PZP_HUMAN			FALSE
ATWSGAVLAGR	57.4	1087.58	11	2.6	544.799	2	17.607	11200000	71000000	3733	20210526_HS_Frac4-1.raw	9	P04217|A1BG_HUMAN			FALSE
AVDQSVLLM(+15.99)KPDAELSASSVYNLLPEK	44.06	2932.51	27	4.9	978.519	3	26.5333	523000	5260000	6974	20210526_HS_Frac3-2.raw	2	P01023|A2MG_HUMAN	Oxidation (M)		FALSE
AVISPGFDVFAK	51.19	1249.67	12	3	625.847	2	23.3851	325000	3870000	6022	20210526_HS_Frac3-3.raw	3	E7ETN3|E7ETN3_HUMAN;B4E1Z4|B4E1Z4_HUMAN			FALSE
AVLDVFEEGTEASAATAVK	73.28	1906.95	19	3.1	954.49	2	22.7328	22800000	159000000	5791	20210526_HS_Frac3-3.raw	16	G3V3A0|G3V3A0_HUMAN;P01011|AACT_HUMAN			FALSE
AVLTIDEK	45.91	887.496	8	-1	444.757	2	10.0254	81500000	573000000	2465	20210526_HS_Frac2-3.raw	35				FALSE
AVLYNYR	46.63	897.471	7	0.1	449.745	2	9.8406	12400000	28500000	2139	20210526_HS_Frac2-3.raw	26	P01024|CO3_HUMAN			FALSE
AVM(+15.99)D(+21.98)DFAAFVEK	52.85	1379.6	12	1.2	690.813	2	21.8616	1280000	6870000	5464	20210526_HS_Frac3-2.raw	12	A0A0C4DGB6|A0A0C4DGB6_HUMAN;A0A087WWT3|A0A087WWT3_HUMAN;P02768|ALBU_HUMAN;C9JKR2|C9JKR2_HUMAN;D6RHD5|D6RHD5_HUMAN;B7WNR0|B7WNR0_HUMAN;H0YA55|H0YA55_HUMAN	Oxidation (M); Sodium adduct	M3:Oxidation (M):1000.00;D4:Sodium adduct:0.00	FALSE
AVM(+15.99)DD(+21.98)FAAFVEK	55.9	1379.6	12	-9.1	460.873	3	21.1609	75200000	335000000	5626	20210526_HS_Frac2-2.raw	26	A0A0C4DGB6|A0A0C4DGB6_HUMAN;A0A087WWT3|A0A087WWT3_HUMAN;P02768|ALBU_HUMAN;C9JKR2|C9JKR2_HUMAN;D6RHD5|D6RHD5_HUMAN;B7WNR0|B7WNR0_HUMAN;H0YA55|H0YA55_HUMAN	Oxidation (M); Sodium adduct	M3:Oxidation (M):1000.00;D5:Sodium adduct:0.00	FALSE
AVM(+15.99)DDFAAFVEK	68.47	1357.62	12	-4.9	679.818	2	21.7263	731000000	3350000000	5246	20210526_HS_Frac4-1.raw	410	A0A0C4DGB6|A0A0C4DGB6_HUMAN;A0A087WWT3|A0A087WWT3_HUMAN;P02768|ALBU_HUMAN;C9JKR2|C9JKR2_HUMAN;D6RHD5|D6RHD5_HUMAN;B7WNR0|B7WNR0_HUMAN;H0YA55|H0YA55_HUMAN	Oxidation (M)		FALSE
AVMD(+21.98)DFAAFVEK	47.34	1363.61	12	5.7	682.818	2	23.8252	137000	1760000	6168	20210526_HS_Frac3-2.raw	2	A0A0C4DGB6|A0A0C4DGB6_HUMAN;A0A087WWT3|A0A087WWT3_HUMAN;P02768|ALBU_HUMAN;C9JKR2|C9JKR2_HUMAN;D6RHD5|D6RHD5_HUMAN;B7WNR0|B7WNR0_HUMAN;H0YA55|H0YA55_HUMAN	Sodium adduct	D4:Sodium adduct:11.06	FALSE
AVMDDFAAFVEK	61.77	1341.63	12	-0.7	671.823	2	23.829	28600000	251000000	6537	20210526_HS_Frac3-3.raw	27	A0A0C4DGB6|A0A0C4DGB6_HUMAN;A0A087WWT3|A0A087WWT3_HUMAN;P02768|ALBU_HUMAN;C9JKR2|C9JKR2_HUMAN;D6RHD5|D6RHD5_HUMAN;B7WNR0|B7WNR0_HUMAN;H0YA55|H0YA55_HUMAN			FALSE
AVSM(+15.99)PSFSILGSDVR	57.66	1580.79	15	4	791.407	2	22.3743	5540000	46500000	5659	20210526_HS_Frac3-3.raw	6	P04114|APOB_HUMAN	Oxidation (M)		FALSE
AVYTC(+57.02)NEGYQLLGEINYR	41.83	2162.01	18	3	1082.02	2	24.2255	68100	892000	6291	20210526_HS_Frac3-1.raw	1	A0A0D9SG88|A0A0D9SG88_HUMAN;P08603|CFAH_HUMAN;Q5TFM2|Q5TFM2_HUMAN	Carbamidomethylation	C5:Carbamidomethylation:1000.00	FALSE
AYLEEEC(+57.02)PATLR	49.9	1450.68	12	1.7	726.349	2	17.0317	1490000	30800000	3751	20210526_HS_Frac3-3.raw	6	C9JEV0|C9JEV0_HUMAN;P25311|ZA2G_HUMAN	Carbamidomethylation	C7:Carbamidomethylation:1000.00	FALSE
AYSLFSYNTQGR	48	1405.66	12	2.1	703.843	2	19.6776	656000	7170000	5088	20210526_HS_Frac2-3.raw	3	P02743|SAMP_HUMAN			FALSE
AYYENSPQQVFSTEFEVK	73.01	2165	18	0.6	1083.51	2	23.6707	2710000	27200000	5968	20210526_HS_Frac4-1.raw	10	P01024|CO3_HUMAN			FALSE
C(+57.02)C(+57.02)TESLVNR	37.43	1137.49	9	4.9	569.758	2	7.0896	637000	2260000	1529	20210526_HS_Frac2-2.raw	6	A0A0C4DGB6|A0A0C4DGB6_HUMAN;#CONTAM#cont|000097|;#CONTAM#cont|000035|;A0A087WWT3|A0A087WWT3_HUMAN;P02768|ALBU_HUMAN;#CONTAM#cont|000017|;C9JKR2|C9JKR2_HUMAN;D6RHD5|D6RHD5_HUMAN;B7WNR0|B7WNR0_HUMAN;H0YA55|H0YA55_HUMAN	Carbamidomethylation; Carbamidomethylation	C1:Carbamidomethylation:1000.00;C2:Carbamidomethylation:1000.00	FALSE
C(+57.02)PNPPVQENFDVNK	40.03	1656.76	14	-3.3	829.385	2	16.4727	178000	1800000	3542	20210526_HS_Frac3-1.raw	3	C9JX71|C9JX71_HUMAN;P05090|APOD_HUMAN;C9JF17|C9JF17_HUMAN	Carbamidomethylation	C1:Carbamidomethylation:1000.00	FALSE
C(+57.02)STSSLLEAC(+57.02)TFR	62.36	1530.68	13	0.4	766.351	2	19.854	1350000	17800000	4724	20210526_HS_Frac3-2.raw	6	P02787|TRFE_HUMAN	Carbamidomethylation; Carbamidomethylation	C1:Carbamidomethylation:1000.00;C10:Carbamidomethylation:1000.00	FALSE
C(+57.02)SYTEDAQC(+57.02)IDGTIEVPK	44.78	2084.9	18	2	1043.46	2	21.5002	365000	4320000	3698	20210526_HS_Frac5-2.raw	3	P02749|APOH_HUMAN	Carbamidomethylation; Carbamidomethylation	C1:Carbamidomethylation:1000.00;C9:Carbamidomethylation:1000.00	FALSE
D(+21.98)IQM(+15.99)TQSPSSLSASVGDR	45.35	1915.86	18	1.4	639.629	3	15.6676	11100000	74500000	3265	20210526_HS_Frac4-3.raw	5	A0A2Q2TTZ9|A0A2Q2TTZ9_HUMAN	Sodium adduct; Oxidation (M)	D1:Sodium adduct:50.71;M4:Oxidation (M):1000.00	FALSE
D(+21.98)IQMTQSPSSLSASVGDR	38.33	1899.86	18	0.1	634.297	3	16.6189	77900	952000	3424	20210526_HS_Frac4-1.raw	3	A0A2Q2TTZ9|A0A2Q2TTZ9_HUMAN	Sodium adduct	D1:Sodium adduct:80.24	FALSE
D(+21.98)LGEENFKALVLIAFAQYLQQC(+57.02)PFED(+21.98)HVKLVNEVTEFAK	46.23	4596.26	39	-7	767.049	6	32.6471	14200	62000	8905	20210526_HS_Frac2-3.raw	1	A0A0C4DGB6|A0A0C4DGB6_HUMAN;A0A087WWT3|A0A087WWT3_HUMAN;P02768|ALBU_HUMAN;H7C013|H7C013_HUMAN	Sodium adduct; Carbamidomethylation; Sodium adduct	D1:Sodium adduct:0.00;C22:Carbamidomethylation:1000.00;D26:Sodium adduct:0.00	FALSE
DADPDTFFAK	52.83	1125.5	10	4.3	563.761	2	17.0556	3800000	16500000	3729	20210526_HS_Frac3-3.raw	3	P43652|AFAM_HUMAN			FALSE
DAEAWFNEK	50.3	1108.48	9	2.2	555.252	2	16.7312	1290000	7000000	3978	20210526_HS_Frac2-3.raw	6	#CONTAM#cont|000133|;P13645|K1C10_HUMAN;#CONTAM#cont|000129|;#CONTAM#cont|000136|;#CONTAM#cont|000122|;#CONTAM#cont|000130|			FALSE
DALSSVQE(+21.98)SQVAQQAR	52.03	1737.83	16	3.3	580.287	3	15.9	653000	5790000	3260	20210526_HS_Frac4-2.raw	3	P02656|APOC3_HUMAN;B0YIW2|B0YIW2_HUMAN	Sodium adduct	E8:Sodium adduct:83.89	FALSE
DALSSVQESQVAQQAR	70.69	1715.84	16	3.3	858.936	2	15.9	4240000	43000000	3254	20210526_HS_Frac4-2.raw	13	P02656|APOC3_HUMAN;B0YIW2|B0YIW2_HUMAN			FALSE
DASGATFTWTPSSGK	67.51	1511.69	15	2.6	756.857	2	18.2808	2580000	23900000	3953	20210526_HS_Frac4-1.raw	5				FALSE
DASGVTFTWTPSSGK	70.23	1539.72	15	0.8	770.871	2	20.1754	42300000	394000000	4653	20210526_HS_Frac4-1.raw	45	P01876|IGHA1_HUMAN;A0A286YEY1|A0A286YEY1_HUMAN			FALSE
DASGVTFTWTPSSGK(+21.98)	42.37	1561.7	15	2	781.863	2	20.2041	84100	2460000	4873	20210526_HS_Frac3-3.raw	1	P01876|IGHA1_HUMAN;A0A286YEY1|A0A286YEY1_HUMAN	Sodium adduct	K15:Sodium adduct:87.64	FALSE
DAVEDLESVGK	39.45	1160.56	11	2.8	581.289	2	16.5425	35200	349000	3591	20210526_HS_Frac3-3.raw	1				FALSE
DAVEKPQEFTIVAFVK	50.61	1819.97	16	3.3	607.669	3	24.762	132000	1890000	6941	20210526_HS_Frac2-1.raw	1	P04114|APOB_HUMAN			FALSE
DC(+57.02)HLAQVPSHTVVAR	72.73	1688.84	15	5.2	563.957	3	15.2618	2100000	15200000	2793	20210526_HS_Frac1-3.raw	14	P02787|TRFE_HUMAN	Carbamidomethylation	C2:Carbamidomethylation:1000.00	FALSE
DD(+21.98)NPNLPR	46.08	961.423	8	-5.6	481.718	2	5.4619	228000000	1030000000	991	20210526_HS_Frac2-3.raw	43	A0A0C4DGB6|A0A0C4DGB6_HUMAN;A0A087WWT3|A0A087WWT3_HUMAN;P02768|ALBU_HUMAN;H7C013|H7C013_HUMAN	Sodium adduct	D2:Sodium adduct:17.01	FALSE
DDFLIYDR	55.79	1055.49	8	1.1	528.756	2	19.173	163000	1550000	4478	20210526_HS_Frac3-2.raw	3	A0A182DWH7|A0A182DWH7_HUMAN;P49908|SEPP1_HUMAN			FALSE
DDLYVSDAFHK	59.28	1308.6	11	-2.6	655.308	2	16.9549	6760000	83000000	4063	20210526_HS_Frac2-3.raw	12	P01008|ANT3_HUMAN			FALSE
DDNPNLPR	58.54	939.441	8	-0.8	470.729	2	10.5099	373000000	1520000000	2259	20210526_HS_Frac2-3.raw	210	A0A0C4DGB6|A0A0C4DGB6_HUMAN;A0A087WWT3|A0A087WWT3_HUMAN;P02768|ALBU_HUMAN;H7C013|H7C013_HUMAN			FALSE
DDTVC(+57.02)LAK	44.38	920.427	8	-5.3	461.221	2	5.9367	7480000	16500000	1073	20210526_HS_Frac2-3.raw	20	P02787|TRFE_HUMAN	Carbamidomethylation	C5:Carbamidomethylation:1000.00	FALSE
DEELSC(+57.02)TVVELK	59.37	1420.68	12	2.9	711.35	2	18.9858	4070000	54200000	4251	20210526_HS_Frac4-3.raw	5	G3V595|G3V595_HUMAN;G3V3A0|G3V3A0_HUMAN;P01011|AACT_HUMAN	Carbamidomethylation	C6:Carbamidomethylation:1000.00	FALSE
DEPTYILNIK	48.66	1204.63	10	3.2	603.328	2	20.6775	356000	3690000	5023	20210526_HS_Frac3-2.raw	2	A8MUN2|A8MUN2_HUMAN;P04114|APOB_HUMAN			FALSE
DFALLSLQVPLK	48.68	1342.79	12	2.5	672.404	2	28.1125	218000	2150000	7414	20210526_HS_Frac3-1.raw	2				FALSE
DFALLSLQVPLKDAK	42.96	1656.95	15	0.2	553.324	3	26.4966	64700	791000	7525	20210526_HS_Frac2-1.raw	1				FALSE
DFD(+21.98)FVPPVVR	40.5	1211.6	10	1.9	606.808	2	23.9468	415000	3640000	6197	20210526_HS_Frac3-1.raw	2	P01024|CO3_HUMAN	Sodium adduct	D3:Sodium adduct:25.93	FALSE
DFDFVPPVVR	66.14	1189.61	10	4.6	595.819	2	25.2238	26800000	419000000	6588	20210526_HS_Frac3-2.raw	42	P01024|CO3_HUMAN			FALSE
DFVQPPTK	45.57	930.481	8	1.3	466.25	2	7.4748	1090000	2960000	1540	20210526_HS_Frac2-3.raw	3	P01042|KNG1_HUMAN			FALSE
DFYVDENTTVR	36.83	1357.62	11	1.6	679.818	2	16.0994	129000	1210000	3446	20210526_HS_Frac3-1.raw	2	P29622|KAIN_HUMAN			FALSE
DGAGDVAFVK	61.9	977.482	10	-1.5	489.749	2	11.2243	107000000	496000000	3061	20210526_HS_Frac3-3.raw	86	C9JVG0|C9JVG0_HUMAN;P02787|TRFE_HUMAN			FALSE
DGFFGNPR	55.01	908.414	8	-0.8	455.216	2	13.038	6730000	18400000	2659	20210526_HS_Frac3-3.raw	15	P01871|IGHM_HUMAN			FALSE
DGSPDVTTAD(+21.98)IGANTPDATK	57.23	1966.87	20	3.4	656.637	3	16.1757	195000	2080000	3343	20210526_HS_Frac4-2.raw	2	Q96PD5|PGRP2_HUMAN	Sodium adduct	D10:Sodium adduct:45.16	FALSE
DGSPDVTTADIGANTPDATK	57.11	1944.89	20	-0.9	973.456	2	16.0655	1010000	8210000	3272	20210526_HS_Frac4-1.raw	2	Q96PD5|PGRP2_HUMAN			FALSE
DGWSAQPTC(+57.02)IK	52.28	1261.58	11	1.6	631.798	2	15.0828	912000	3540000	3138	20210526_HS_Frac3-3.raw	3	P08603|CFAH_HUMAN	Carbamidomethylation	C9:Carbamidomethylation:1000.00	FALSE
DGYLFQLLR	59.93	1123.6	9	3.4	562.812	2	25.9516	1930000	20200000	6780	20210526_HS_Frac3-3.raw	4	P04196|HRG_HUMAN			FALSE
DHAVDLIQK	50.53	1037.55	9	2.2	519.784	2	7.717	1690000	3620000	1445	20210526_HS_Frac1-3.raw	4				FALSE
DIAPTLTLYVGK	59.07	1289.72	12	-0.7	645.871	2	22.8026	8170000	77200000	5634	20210526_HS_Frac4-1.raw	40	P00738|HPT_HUMAN;A0A0A0MRD9|A0A0A0MRD9_HUMAN;J3QLC9|J3QLC9_HUMAN;H3BS21|H3BS21_HUMAN;A0A087WU08|A0A087WU08_HUMAN;H0Y300|H0Y300_HUMAN;A0A0C4DGL8|A0A0C4DGL8_HUMAN;J3QR68|J3QR68_HUMAN;P00739|HPTR_HUMAN			FALSE
DIASGLIGPLIIC(+57.02)K	68.15	1468.83	14	-1.9	735.425	2	26.6929	2210000	23400000	6960	20210526_HS_Frac4-1.raw	9	E9PFZ2|E9PFZ2_HUMAN;P00450|CERU_HUMAN	Carbamidomethylation	C13:Carbamidomethylation:1000.00	FALSE
DIC(+57.02)EE(+21.98)QVNSLPGSITK	47.21	1810.84	16	3.6	604.624	3	18.9317	333000	3480000	4207	20210526_HS_Frac4-1.raw	2	M0R0Q9|M0R0Q9_HUMAN;P01024|CO3_HUMAN	Carbamidomethylation; Sodium adduct	C3:Carbamidomethylation:1000.00;E5:Sodium adduct:0.00	FALSE
DIC(+57.02)EEQVN(+0.98)SLPGSITK	61.48	1789.84	16	2	895.933	2	18.6459	169000	1270000	4082	20210526_HS_Frac4-1.raw	2	M0R0Q9|M0R0Q9_HUMAN;P01024|CO3_HUMAN	Carbamidomethylation; Deamidation (NQ)	C3:Carbamidomethylation:1000.00;N8:Deamidation (NQ):32.28	FALSE
DIC(+57.02)EEQVNSLPGSITK	71.37	1788.86	16	2.5	895.441	2	18.9317	6380000	64500000	4191	20210526_HS_Frac4-1.raw	9	M0R0Q9|M0R0Q9_HUMAN;P01024|CO3_HUMAN	Carbamidomethylation	C3:Carbamidomethylation:1000.00	FALSE
DIFTGLIGPM(+15.99)K	58.85	1206.63	11	1.5	604.326	2	23.0115	12300000	97100000	5719	20210526_HS_Frac4-1.raw	8	E9PFZ2|E9PFZ2_HUMAN;H7C5R1|H7C5R1_HUMAN;P00450|CERU_HUMAN	Oxidation (M)		FALSE
DINYVNPVIK	52.71	1173.64	10	3.7	587.831	2	18.8272	1650000	15800000	4346	20210526_HS_Frac3-3.raw	3	P01031|CO5_HUMAN			FALSE
DIPM(+15.99)NPM(+15.99)C(+57.02)IYR	47.69	1440.62	11	3.1	721.322	2	16.9534	2820000	25700000	3734	20210526_HS_Frac3-3.raw	5	P01008|ANT3_HUMAN;Q8TCE1|Q8TCE1_HUMAN	Oxidation (M); Oxidation (M); Carbamidomethylation	C8:Carbamidomethylation:1000.00	FALSE
DIPTNSPELEETLTHTITK	71.21	2138.07	19	-9.4	713.695	3	22.7052	4120000	59800000	6234	20210526_HS_Frac2-3.raw	9	P01042|KNG1_HUMAN			FALSE
DIQ(+0.98)MTQ(+0.98)SPSSLSASVGDR	35.65	1879.85	18	9.7	940.943	2	15.4192	2450000	6090000	3157	20210526_HS_Frac4-3.raw	5	A0A2Q2TTZ9|A0A2Q2TTZ9_HUMAN	Deamidation (NQ); Deamidation (NQ)		FALSE
DIQM(+15.99)TQSPSSLSASVGDR	69.42	1893.87	18	-2.8	947.945	2	16.035	45500000	385000000	3365	20210526_HS_Frac4-1.raw	32	A0A2Q2TTZ9|A0A2Q2TTZ9_HUMAN	Oxidation (M)		FALSE
DIQMTQSPSSLSASVGDR	37.11	1877.88	18	0.3	939.951	2	16.6562	460000	3410000	3477	20210526_HS_Frac4-2.raw	3	A0A2Q2TTZ9|A0A2Q2TTZ9_HUMAN			FALSE
DISEVVTPR	47.33	1014.53	9	0.5	508.277	2	12.0791	4520000	10000000	2545	20210526_HS_Frac3-2.raw	11	H7C5H1|H7C5H1_HUMAN;E7ETN3|E7ETN3_HUMAN;P00751|CFAB_HUMAN;B4E1Z4|B4E1Z4_HUMAN			FALSE
DIVM(+15.99)TQSPLSLPVTPGEPASISC(+57.02)R	34.09	2570.27	24	5.5	857.769	3	24.4204	220000	2530000	4412	20210526_HS_Frac5-2.raw	2		Oxidation (M); Carbamidomethylation	C23:Carbamidomethylation:1000.00	FALSE
DKDQEVLLQTFLDDASPGDKR	69.16	2389.18	21	1.7	797.404	3	25.4654	892000	11400000	7172	20210526_HS_Frac2-2.raw	3	A8MUN2|A8MUN2_HUMAN;P04114|APOB_HUMAN			FALSE
DLATVYVDVLK	54.79	1234.68	11	-1.4	618.349	2	23.8763	9510000	73800000	6163	20210526_HS_Frac3-3.raw	5	P02647|APOA1_HUMAN			FALSE
DLC(+57.02)GC(+57.02)YSVSSVLPGC(+57.02)AEPWNHGK	57.72	2592.12	23	3.7	865.053	3	23.4978	517000	7030000	6499	20210526_HS_Frac2-1.raw	3	P01876|IGHA1_HUMAN;A0A286YEY1|A0A286YEY1_HUMAN	Carbamidomethylation; Carbamidomethylation; Carbamidomethylation	C3:Carbamidomethylation:1000.00;C5:Carbamidomethylation:1000.00;C15:Carbamidomethylation:1000.00	FALSE
DLGEE(+21.98)NFK	43.99	972.416	8	-2.2	487.217	2	7.0036	91300000	294000000	1350	20210526_HS_Frac2-3.raw	16	A0A0C4DGB6|A0A0C4DGB6_HUMAN;A0A087WWT3|A0A087WWT3_HUMAN;P02768|ALBU_HUMAN;H7C013|H7C013_HUMAN;C9JKR2|C9JKR2_HUMAN;B7WNR0|B7WNR0_HUMAN	Sodium adduct	E5:Sodium adduct:21.94	FALSE
DLGEENFK	45.06	950.434	8	-2.7	476.225	2	7.0404	225000000	516000000	1322	20210526_HS_Frac2-3.raw	108	A0A0C4DGB6|A0A0C4DGB6_HUMAN;A0A087WWT3|A0A087WWT3_HUMAN;P02768|ALBU_HUMAN;H7C013|H7C013_HUMAN;C9JKR2|C9JKR2_HUMAN;B7WNR0|B7WNR0_HUMAN			FALSE
DLKVEDIPLAR	43.83	1267.71	11	0.2	423.58	3	19.9524	1520000	14700000	5136	20210526_HS_Frac2-1.raw	6	P04114|APOB_HUMAN			FALSE
DLLFRDDTVC(+57.02)LAK	55.91	1564.79	13	2.9	783.409	2	21.8688	6260000	64100000	5916	20210526_HS_Frac2-2.raw	7	P02787|TRFE_HUMAN	Carbamidomethylation	C10:Carbamidomethylation:1000.00	FALSE
DLTGFPGPLNDQ(+0.98)DNEDC(+57.02)INR	36.7	2289.98	20	5.3	1146	2	21.8032	165000	1460000	3777	20210526_HS_Frac5-3.raw	1	P01023|A2MG_HUMAN	Deamidation (NQ); Carbamidomethylation	Q12:Deamidation (NQ):0.00;C17:Carbamidomethylation:1000.00	FALSE
DLTGFPGPLNDQDN(+0.98)EDC(+57.02)INR	67.43	2289.98	20	-2.5	764.335	3	21.7852	1870000	17900000	5260	20210526_HS_Frac4-1.raw	10	P01023|A2MG_HUMAN	Deamidation (NQ); Carbamidomethylation	N14:Deamidation (NQ):22.85;C17:Carbamidomethylation:1000.00	FALSE
DLYSGLIGPLIVC(+57.02)R	55.5	1574.85	14	0.5	788.435	2	27.6036	351000	3020000	7216	20210526_HS_Frac3-3.raw	3	E9PFZ2|E9PFZ2_HUMAN;H7C5R1|H7C5R1_HUMAN;P00450|CERU_HUMAN	Carbamidomethylation	C13:Carbamidomethylation:1000.00	FALSE
DM(+15.99)YSFLEDM(+15.99)GLK	53.78	1479.63	12	1.9	740.824	2	20.737	3340000	35600000	5050	20210526_HS_Frac3-2.raw	16	P01023|A2MG_HUMAN	Oxidation (M); Oxidation (M)		FALSE
DNELLVYK	50.21	992.518	8	-2.1	497.267	2	15.9415	1950000	6340000	3381	20210526_HS_Frac3-3.raw	4	P02743|SAMP_HUMAN			FALSE
DNVFDGLVR	58.88	1033.52	9	2.6	517.77	2	19.8377	3320000	30100000	5142	20210526_HS_Frac2-3.raw	5	P04114|APOB_HUMAN			FALSE
DPN(+0.98)GLPPEAQK	40.6	1165.56	11	-1.5	583.789	2	6.6494	885000	2770000	1347	20210526_HS_Frac3-3.raw	7	Q5VY30|Q5VY30_HUMAN;P02753|RET4_HUMAN	Deamidation (NQ)	N3:Deamidation (NQ):50.34	FALSE
DPTFIPAPIQAK	69.6	1296.71	12	-5.6	649.36	2	20.6784	3480000	39900000	5022	20210526_HS_Frac3-3.raw	3	P01019|ANGT_HUMAN			FALSE
DQYE(+21.98)LLC(+57.02)LDNTR	43.06	1560.69	12	3	521.239	3	20.7928	89800	2600000	5071	20210526_HS_Frac3-2.raw	3	C9JVG0|C9JVG0_HUMAN;P02787|TRFE_HUMAN	Sodium adduct; Carbamidomethylation	E4:Sodium adduct:36.47;C7:Carbamidomethylation:1000.00	FALSE
DQYELLC(+57.02)LDNTR	66.02	1538.7	12	-8.6	770.355	2	20.8136	3350000	40900000	5074	20210526_HS_Frac3-3.raw	11	C9JVG0|C9JVG0_HUMAN;P02787|TRFE_HUMAN	Carbamidomethylation	C7:Carbamidomethylation:1000.00	FALSE
DSC(+57.02)VGSLVVK	57.43	1062.54	10	1.9	532.279	2	13.9412	17800000	58400000	2968	20210526_HS_Frac3-3.raw	13	P01024|CO3_HUMAN	Carbamidomethylation	C3:Carbamidomethylation:1000.00	FALSE
DSFHLDEQFTVPVEM(+15.99)M(+15.99)QAR	38.54	2311.02	19	7.5	771.357	3	22.8151	31400	949000	5789	20210526_HS_Frac3-1.raw	1	A0A0G2JPA8|A0A0G2JPA8_HUMAN;P08697|A2AP_HUMAN	Oxidation (M); Oxidation (M)		FALSE
DSGFQM(+15.99)NQLR	54.72	1210.54	10	-3.2	606.278	2	6.8675	69500000	268000000	1398	20210526_HS_Frac3-3.raw	54	P02787|TRFE_HUMAN	Oxidation (M)		FALSE
DSPVLIDFFEDTER	50.57	1681.78	14	3.6	841.905	2	27.4353	1030000	9270000	7209	20210526_HS_Frac4-2.raw	5	P04196|HRG_HUMAN			FALSE
DSSTWLTAFVLK	38.13	1366.71	12	5.9	684.37	2	27.8501	154000	1620000	7360	20210526_HS_Frac3-1.raw	1				FALSE
DSTYSLSSTLTLSK	67.14	1501.75	14	-4.8	751.882	2	20.2041	43100000	466000000	4869	20210526_HS_Frac3-3.raw	38	A0A5H1ZRQ3|A0A5H1ZRQ3_HUMAN;P01834|IGKC_HUMAN			FALSE
DTDTGALLFIGK	59.04	1249.66	12	1.2	625.838	2	22.2126	1720000	14200000	5592	20210526_HS_Frac3-3.raw	4	P36955|PEDF_HUMAN			FALSE
DTE(+21.98)EEDFHVDQVTTVK	36.31	1912.83	16	-4.6	638.617	3	17.5528	130000	1770000	4259	20210526_HS_Frac2-3.raw	1		Sodium adduct	E3:Sodium adduct:0.00	FALSE
DTEE(+21.98)EDFHVDQVTTVK	37.05	1912.83	16	0.8	957.427	2	17.524	166000	2120000	4255	20210526_HS_Frac2-3.raw	1		Sodium adduct	E4:Sodium adduct:0.00	FALSE
DTEEEDFHVD(+21.98)QVTTVK	36.62	1912.83	16	-0.6	957.425	2	17.5737	106000	2280000	4250	20210526_HS_Frac2-1.raw	2		Sodium adduct	D10:Sodium adduct:10.80	FALSE
DTEEEDFHVDQ(+0.98)VTTVK	58.23	1891.83	16	-3.2	946.923	2	17.5395			4232	20210526_HS_Frac2-1.raw	2		Deamidation (NQ)		FALSE
DTEEEDFHVDQATTVK	73.63	1862.82	16	2.1	932.421	2	15.2459	69500000	408000000	3481	20210526_HS_Frac2-2.raw	21				FALSE
DTEEEDFHVDQVTTVK	77.7	1890.85	16	1	946.436	2	17.65	91100000	987000000	3953	20210526_HS_Frac3-3.raw	29				FALSE
DTGTYGFLLPER	49.35	1367.67	12	5.6	684.85	2	22.2231	490000	5070000	5604	20210526_HS_Frac3-3.raw	3	A0A087WSY5|A0A087WSY5_HUMAN;Q96IY4|CBPB2_HUMAN			FALSE
DTSISTAYM(+15.99)ELSR	49.62	1488.68	13	1.4	745.349	2	19.1124	244000	1830000	4422	20210526_HS_Frac3-2.raw	3	P23083|HV102_HUMAN	Oxidation (M)		FALSE
DTVIKPLLVEPEGLEK	68.31	1779	16	-5.7	594.007	3	23.0818	37500000	382000000	6369	20210526_HS_Frac2-3.raw	24	P01023|A2MG_HUMAN			FALSE
DTWVEHWPEEDEC(+57.02)QDEENQK	81.28	2602.02	20	3.7	868.353	3	19.607	2410000	22900000	4655	20210526_HS_Frac3-3.raw	3	P01024|CO3_HUMAN	Carbamidomethylation	C13:Carbamidomethylation:1000.00	FALSE
DVFLGM(+15.99)FLYEYAR	50.89	1638.78	13	4.1	820.401	2	28.3638	3620000	18900000	7404	20210526_HS_Frac3-2.raw	6	A0A0C4DGB6|A0A0C4DGB6_HUMAN;P02768|ALBU_HUMAN;C9JKR2|C9JKR2_HUMAN;D6RHD5|D6RHD5_HUMAN;B7WNR0|B7WNR0_HUMAN;H0YA55|H0YA55_HUMAN	Oxidation (M)		FALSE
DVVLFEK	35.79	848.464	7	0.8	425.241	2	16.0756	1800000	6460000	3695	20210526_HS_Frac2-1.raw	4	A6PVI2|A6PVI2_HUMAN;Q5TEH5|Q5TEH5_HUMAN;P00747|PLMN_HUMAN			FALSE
DVWGIEGPIDAAFTR	63.5	1645.81	15	0	823.915	2	26.5156	3020000	20900000	6950	20210526_HS_Frac3-3.raw	6	P04004|VTNC_HUMAN			FALSE
DWHGVPGQVDAAM(+15.99)AGR	61.27	1681.76	16	3.9	561.599	3	16.8164	9130000	56800000	3673	20210526_HS_Frac3-3.raw	6	P04004|VTNC_HUMAN	Oxidation (M)		FALSE
DYAGVFSDAGLTFTSSSGQQTAQR	65.53	2493.14	24	0.8	1247.58	2	23.5857	787000	11200000	5929	20210526_HS_Frac4-1.raw	6	P01024|CO3_HUMAN			FALSE
DYELLC(+57.02)LDGTR	60.19	1353.62	11	-0.8	677.821	2	20.8741	5660000	37000000	5099	20210526_HS_Frac3-3.raw	15	P02787|TRFE_HUMAN	Carbamidomethylation	C6:Carbamidomethylation:1000.00	FALSE
DYFM(+15.99)PC(+57.02)PGR	50.43	1157.46	9	0.9	579.742	2	11.0156	17900000	70100000	2484	20210526_HS_Frac2-2.raw	31	P02790|HEMO_HUMAN;Q9BS19|Q9BS19_HUMAN	Oxidation (M); Carbamidomethylation	C6:Carbamidomethylation:1000.00	FALSE
DYQELM(+15.99)NVK	41.16	1154.53	9	1.2	578.274	2	7.8288	241000	741000	1665	20210526_HS_Frac3-3.raw	2	P35908|K22E_HUMAN	Oxidation (M)		FALSE
DYVSQFE(+21.98)GSALGK	50.59	1421.64	13	1.6	711.833	2	19.7976	649000	6940000	4712	20210526_HS_Frac3-2.raw	3	P02647|APOA1_HUMAN	Sodium adduct	E7:Sodium adduct:68.95	FALSE
DYVSQFEGSALGK	68.05	1399.66	13	-8.1	700.835	2	19.804	8300000	89500000	4543	20210526_HS_Frac4-3.raw	32	P02647|APOA1_HUMAN			FALSE
E(+21.98)DPQTFYYAVAVVK	39.9	1650.79	14	3.9	551.275	3	23.2391	389000	4660000	5955	20210526_HS_Frac3-3.raw	2	P02787|TRFE_HUMAN	Sodium adduct	E1:Sodium adduct:0.00	FALSE
E(+21.98)PQVYTLPPSR	43.51	1307.65	11	0.2	436.892	3	16.3653	5950000	17800000	3642	20210526_HS_Frac3-2.raw	6	P01859|IGHG2_HUMAN;A0A4W9A917|A0A4W9A917_HUMAN;P01857|IGHG1_HUMAN;P01860|IGHG3_HUMAN;A0A286YEY4|A0A286YEY4_HUMAN;A0A0A0MS08|A0A0A0MS08_HUMAN;A0A0A0MS07|A0A0A0MS07_HUMAN;A0A286YES1|A0A286YES1_HUMAN	Sodium adduct	E1:Sodium adduct:49.99	FALSE
E(-18.01)AQLPVIE(+21.98)NK	42.11	1143.59	10	2.9	572.806	2	18.3919	350000	2900000	4067	20210526_HS_Frac4-2.raw	3	P00747|PLMN_HUMAN	Pyro-glu from E; Sodium adduct	E1:Pyro-glu from E:1000.00;E8:Sodium adduct:38.40	FALSE
E(-18.01)AQLPVIENK	60.09	1121.61	10	1	561.814	2	18.3494	406000	4000000	3981	20210526_HS_Frac4-1.raw	3	P00747|PLMN_HUMAN	Pyro-glu from E		FALSE
E(-18.01)C(+57.02)C(+57.02)EKPLLEK	50.36	1286.6	10	1.6	644.311	2	8.2536	7780000	24100000	1748	20210526_HS_Frac2-3.raw	7	A0A0C4DGB6|A0A0C4DGB6_HUMAN;P02768|ALBU_HUMAN;C9JKR2|C9JKR2_HUMAN;D6RHD5|D6RHD5_HUMAN;B7WNR0|B7WNR0_HUMAN;H0YA55|H0YA55_HUMAN	Pyro-glu from E; Carbamidomethylation; Carbamidomethylation	C2:Carbamidomethylation:1000.00;C3:Carbamidomethylation:1000.00	FALSE
E(-18.01)D(+21.98)PQ(+0.98)TFYYAVAVVK	41.38	1633.76	14	-0.7	817.891	2	23.3533	47100	659000	5993	20210526_HS_Frac3-1.raw	2	P02787|TRFE_HUMAN	Pyro-glu from E; Sodium adduct; Deamidation (NQ)	E1:Pyro-glu from E:1000.00;D2:Sodium adduct:96.93;Q4:Deamidation (NQ):1000.00	FALSE
E(-18.01)D(+21.98)PQTFYYAVAVVK	33.17	1632.78	14	3.4	817.403	2	25.1005	608000	5530000	6509	20210526_HS_Frac4-2.raw	2	P02787|TRFE_HUMAN	Pyro-glu from E; Sodium adduct	E1:Pyro-glu from E:1000.00;D2:Sodium adduct:46.10	FALSE
E(-18.01)DIPPADLSDQVPDTESETR	43.52	2194.99	20	1.3	1098.5	2	20.093	843000	2610000	3358	20210526_HS_Frac5-1.raw	3	P01024|CO3_HUMAN	Pyro-glu from E		FALSE
E(-18.01)DPQTFYYAVAVVK	66.53	1610.8	14	6	806.411	2	25.1781	784000	7060000	4610	20210526_HS_Frac5-3.raw	3	P02787|TRFE_HUMAN	Pyro-glu from E		FALSE
E(-18.01)ELLPAQD(+21.98)IK	38.92	1158.59	10	1.7	580.305	2	19.4604	649000	6140000	4401	20210526_HS_Frac4-1.raw	3	H7C5H1|H7C5H1_HUMAN;E7ETN3|E7ETN3_HUMAN;P00751|CFAB_HUMAN;B4E1Z4|B4E1Z4_HUMAN	Pyro-glu from E; Sodium adduct	E1:Pyro-glu from E:1000.00;D8:Sodium adduct:29.67	FALSE
E(-18.01)ELLPAQDIK	46.91	1136.61	10	2.8	569.315	2	19.4273	265000	3440000	4390	20210526_HS_Frac4-1.raw	3	H7C5H1|H7C5H1_HUMAN;E7ETN3|E7ETN3_HUMAN;P00751|CFAB_HUMAN;B4E1Z4|B4E1Z4_HUMAN	Pyro-glu from E		FALSE
E(-18.01)FQLFSSPHGK	60.07	1257.61	11	5.6	629.818	2	22.0682	11300000	98800000	4430	20210526_HS_Frac1-1.raw	19	P02787|TRFE_HUMAN	Pyro-glu from E		FALSE
E(-18.01)FQVPTFTIPK	50.23	1287.69	11	2.4	644.854	2	26.4971	536000	5150000	6872	20210526_HS_Frac4-3.raw	3	P04114|APOB_HUMAN	Pyro-glu from E		FALSE
E(-18.01)FTPPVQAAYQK	52.36	1359.68	12	3.6	680.853	2	19.5819	47300	1110000	4444	20210526_HS_Frac4-1.raw	2	P68871|HBB_HUMAN	Pyro-glu from E		FALSE
E(-18.01)GTC(+57.02)PEAPTDEC(+57.02)KPVK	44.06	1798.79	16	-1.3	900.403	2	6.8611	1040000	6620000	1420	20210526_HS_Frac3-2.raw	2	P02787|TRFE_HUMAN	Pyro-glu from E; Carbamidomethylation; Carbamidomethylation	C4:Carbamidomethylation:1000.00;C12:Carbamidomethylation:1000.00	FALSE
E(-18.01)GVQKEDIPPADLSD(+21.98)QVPDTESETR	57.35	2758.25	25	5.2	920.433	3	19.7765	562000	2330000	4521	20210526_HS_Frac4-1.raw	3	P01024|CO3_HUMAN	Pyro-glu from E; Sodium adduct	E1:Pyro-glu from E:1000.00;D15:Sodium adduct:0.00	FALSE
E(-18.01)GVQKEDIPPADLSDQVPDTESETR	59.34	2736.27	25	3.6	913.105	3	19.7664	663000	2570000	4454	20210526_HS_Frac4-1.raw	2	P01024|CO3_HUMAN	Pyro-glu from E		FALSE
E(-18.01)GYYGYTGAFR	60.57	1264.55	11	-2.3	633.284	2	19.8656	1290000	11100000	4553	20210526_HS_Frac4-1.raw	7	H7C5E8|H7C5E8_HUMAN;P02787|TRFE_HUMAN	Pyro-glu from E		FALSE
E(-18.01)HAVEGDC(+57.02)DFQLLK	67.09	1641.75	14	3.4	821.886	2	20.5147	3190000	45200000	4965	20210526_HS_Frac3-3.raw	3	P02765|FETUA_HUMAN;C9JV77|C9JV77_HUMAN	Pyro-glu from E; Carbamidomethylation	C8:Carbamidomethylation:1000.00	FALSE
E(-18.01)HLVQATPENLQEAR	60.19	1715.86	15	3.7	858.943	2	17.5575	76700	1450000	3928	20210526_HS_Frac3-3.raw	3	E7ET33|E7ET33_HUMAN;A0A087WW43|A0A087WW43_HUMAN;Q06033|ITIH3_HUMAN	Pyro-glu from E		FALSE
E(-18.01)HSSLAFWK	51.37	1085.53	9	1.5	543.775	2	20.2291	1970000	16200000	5295	20210526_HS_Frac2-3.raw	5	J3KS17|J3KS17_HUMAN;P02749|APOH_HUMAN	Pyro-glu from E		FALSE
E(-18.01)IGELYLPK	45.44	1042.57	9	-1.2	522.293	2	22.859	923000	8100000	5675	20210526_HS_Frac4-3.raw	3	G3V3A0|G3V3A0_HUMAN;P01011|AACT_HUMAN	Pyro-glu from E		FALSE
E(-18.01)IM(+15.99)ENYNIALR	56.96	1362.66	11	-0.5	682.34	2	20.5614	344000	3920000	4800	20210526_HS_Frac4-1.raw	3	P08603|CFAH_HUMAN	Pyro-glu from E; Oxidation (M)		FALSE
E(-18.01)LLDTVTAPQK	44.04	1195.64	11	4.6	598.835	2	19.0429	41900	733000	4260	20210526_HS_Frac4-1.raw	2	I3L4Z0|I3L4Z0_HUMAN;P36955|PEDF_HUMAN	Pyro-glu from E		FALSE
E(-18.01)LSSFIDK	41.07	919.465	8	-1.6	920.474	1	20.1073	511000	6420000	4625	20210526_HS_Frac4-1.raw	3	P02774|VTDB_HUMAN;D6RF35|D6RF35_HUMAN	Pyro-glu from E		FALSE
E(-18.01)NFAGEATLQR	67.81	1216.58	11	3.9	609.304	2	16.4846	316000	2870000	3398	20210526_HS_Frac4-1.raw	3	P04114|APOB_HUMAN	Pyro-glu from E		FALSE
E(-18.01)PQVYTLPPSR	70.53	1267.66	11	-0.2	634.837	2	18.4566	13000000	29300000	4038	20210526_HS_Frac4-1.raw	7	P01859|IGHG2_HUMAN;A0A4W9A917|A0A4W9A917_HUMAN;P01857|IGHG1_HUMAN;P01860|IGHG3_HUMAN;A0A286YEY4|A0A286YEY4_HUMAN;A0A0A0MS08|A0A0A0MS08_HUMAN;A0A0A0MS07|A0A0A0MS07_HUMAN;A0A286YES1|A0A286YES1_HUMAN	Pyro-glu from E		FALSE
E(-18.01)PQVYTLPPSRDELTK	56.74	1853.95	16	3	927.99	2	20.5318	4400000	9700000	4798	20210526_HS_Frac4-1.raw	6	P01857|IGHG1_HUMAN;A0A0A0MS08|A0A0A0MS08_HUMAN;A0A0A0MS07|A0A0A0MS07_HUMAN	Pyro-glu from E		FALSE
E(-18.01)PQVYTLPPSREEM(+15.99)TK	47.26	1901.92	16	2.2	951.972	2	17.9049	4320000	14400000	3996	20210526_HS_Frac3-1.raw	6	P01859|IGHG2_HUMAN;A0A4W9A917|A0A4W9A917_HUMAN;P01860|IGHG3_HUMAN;A0A286YEY4|A0A286YEY4_HUMAN;A0A286YES1|A0A286YES1_HUMAN	Pyro-glu from E; Oxidation (M)		FALSE
E(-18.01)QHLFLPFSYK	41.6	1389.71	11	3	695.866	2	25.3064	25600	373000	7130	20210526_HS_Frac2-1.raw	1	A8MUN2|A8MUN2_HUMAN;P04114|APOB_HUMAN	Pyro-glu from E		FALSE
E(-18.01)QLQDM(+15.99)GLVDLFSPEK	48.38	1845.88	16	1.4	923.953	2	26.5474	372000	3520000	6914	20210526_HS_Frac4-1.raw	4	P01008|ANT3_HUMAN	Pyro-glu from E; Oxidation (M)		FALSE
E(-18.01)QLSLLDR	44.57	954.513	8	0.5	478.266	2	19.5082	310000	2690000	4425	20210526_HS_Frac4-1.raw	3	G3V595|G3V595_HUMAN;P01011|AACT_HUMAN	Pyro-glu from E		FALSE
E(-18.01)SQLPTVM(+15.99)DFR	35.73	1319.62	11	-0.8	660.818	2	20.2399	220000	1530000	4725	20210526_HS_Frac4-1.raw	1	A8MUN2|A8MUN2_HUMAN;P04114|APOB_HUMAN	Pyro-glu from E; Oxidation (M)		FALSE
E(-18.01)TAASLLQAGYK	66.26	1232.64	12	3.8	617.332	2	19.9118	578000	4300000	4581	20210526_HS_Frac4-3.raw	3	P00734|THRB_HUMAN	Pyro-glu from E		FALSE
E(-18.01)TLFSVM(+15.99)PGLK	53.85	1218.63	11	2.3	610.327	2	23.0115	690000	5270000	5730	20210526_HS_Frac4-1.raw	3	Q14624|ITIH4_HUMAN;B7ZKJ8|B7ZKJ8_HUMAN;H7C0L5|H7C0L5_HUMAN	Pyro-glu from E; Oxidation (M)		FALSE
E(-18.01)TLLQDFR	48.06	1002.51	8	1.8	502.267	2	22.1031	103000	1370000	5387	20210526_HS_Frac4-3.raw	2	P02760|AMBP_HUMAN;S4R471|S4R471_HUMAN;S4R3Y4|S4R3Y4_HUMAN	Pyro-glu from E		FALSE
E(-18.01)TYGE(+21.98)M(+15.99)ADC(+57.02)C(+57.02)AK	50.12	1453.49	12	1.4	727.757	2	5.8442	10100	294000	1188	20210526_HS_Frac2-1.raw	1	A0A0C4DGB6|A0A0C4DGB6_HUMAN;A0A087WWT3|A0A087WWT3_HUMAN;P02768|ALBU_HUMAN;H7C013|H7C013_HUMAN	Pyro-glu from E; Sodium adduct; Oxidation (M); Carbamidomethylation; Carbamidomethylation	E1:Pyro-glu from E:1000.00;E5:Sodium adduct:38.16;M6:Oxidation (M):1000.00;C9:Carbamidomethylation:1000.00;C10:Carbamidomethylation:1000.00	FALSE
E(-18.01)VPLNTIIFM(+15.99)GR	39.17	1386.73	12	3.1	694.378	2	26.1126	457000	5480000	6743	20210526_HS_Frac4-3.raw	3	P01008|ANT3_HUMAN;Q8TCE1|Q8TCE1_HUMAN	Pyro-glu from E; Oxidation (M)		FALSE
E(-18.01)VQLVE(+21.98)SGGGLVQPGGSLR	49.68	1884.97	19	2.9	943.497	2	23.3148	1150000	12600000	5879	20210526_HS_Frac4-2.raw	4		Pyro-glu from E; Sodium adduct	E1:Pyro-glu from E:1000.00;E6:Sodium adduct:63.12	FALSE
E(-18.01)VQLVESGGGLVQPGGSLR	80.17	1862.98	19	2.3	932.506	2	23.2615	2760000	25600000	5876	20210526_HS_Frac4-2.raw	7		Pyro-glu from E		FALSE
E(-18.01)VYGFNPEGK	54.62	1120.52	10	4.4	561.271	2	17.9285	193000	1740000	3860	20210526_HS_Frac4-3.raw	3	A8MUN2|A8MUN2_HUMAN;A0A669KB70|A0A669KB70_HUMAN;P04114|APOB_HUMAN	Pyro-glu from E		FALSE
E(-18.01)YTDASFTNR	57.38	1184.51	10	2.6	593.266	2	13.092	318000	1080000	2621	20210526_HS_Frac4-3.raw	2	E9PFZ2|E9PFZ2_HUMAN;H7C5R1|H7C5R1_HUMAN;P00450|CERU_HUMAN	Pyro-glu from E		FALSE
EAGIPEFYDYDVALIK	61.86	1841.91	16	1.9	921.967	2	26.7234	3520000	30200000	7001	20210526_HS_Frac3-3.raw	6	H7C5H1|H7C5H1_HUMAN;E7ETN3|E7ETN3_HUMAN;P00751|CFAB_HUMAN;A0A0G2JH38|A0A0G2JH38_HUMAN;B4E1Z4|B4E1Z4_HUMAN			FALSE
EAQLPVIENK	42.22	1139.62	10	0.2	570.819	2	15.6329	10400000	82000000	3656	20210526_HS_Frac2-3.raw	12	P00747|PLMN_HUMAN			FALSE
ED(+21.98)PQTFYYAVAVVK	49.71	1650.79	14	3.3	551.274	3	23.2341	624000	8150000	5946	20210526_HS_Frac3-1.raw	4	P02787|TRFE_HUMAN	Sodium adduct	D2:Sodium adduct:0.00	FALSE
EDIFM(+15.99)ETLK	38.78	1140.54	9	3.9	571.28	2	19.0636	34500	452000	4436	20210526_HS_Frac3-2.raw	1	C9JEV0|C9JEV0_HUMAN;P25311|ZA2G_HUMAN	Oxidation (M)		FALSE
EDIPPADLSD(+21.98)QVPDTESETR	55.32	2234.98	20	-1.5	746.002	3	18.6027	6020000	24400000	4323	20210526_HS_Frac4-2.raw	6	P01024|CO3_HUMAN	Sodium adduct	D10:Sodium adduct:12.33	FALSE
EDIPPADLSDQVPDTESETR	62.68	2213	20	2.6	1107.51	2	18.7163	17200000	62000000	4277	20210526_HS_Frac4-1.raw	13	P01024|CO3_HUMAN			FALSE
EDPQ(+0.98)TFYYAVAVVK	33.3	1629.79	14	4.3	815.91	2	26.5324	22400	359000	6915	20210526_HS_Frac4-1.raw	1	P02787|TRFE_HUMAN	Deamidation (NQ)		FALSE
EDPQTFYYAVAVVK	72.1	1628.81	14	3.1	815.417	2	23.151	25100000	312000000	5836	20210526_HS_Frac4-2.raw	47	P02787|TRFE_HUMAN			FALSE
EDVYVVGTVLR	69.06	1248.67	11	-1.3	625.344	2	20.6435	6680000	58400000	5002	20210526_HS_Frac3-2.raw	11	P04003|C4BPA_HUMAN			FALSE
EEIIYEC(+57.02)DK	36.29	1197.52	9	1.2	599.771	2	7.8857	494000	1910000	1694	20210526_HS_Frac3-3.raw	4	P04003|C4BPA_HUMAN	Carbamidomethylation	C7:Carbamidomethylation:1000.00	FALSE
EELC(+57.02)TM(+15.99)FIR	38.82	1213.55	9	3.4	607.786	2	18.2537	474000	3660000	4510	20210526_HS_Frac2-3.raw	2	P04114|APOB_HUMAN	Carbamidomethylation; Oxidation (M)	C4:Carbamidomethylation:1000.00	FALSE
EELLPAQDIK	49.75	1154.62	10	5.8	578.322	2	17.32	6230000	53900000	3813	20210526_HS_Frac3-2.raw	4	H7C5H1|H7C5H1_HUMAN;E7ETN3|E7ETN3_HUMAN;P00751|CFAB_HUMAN;B4E1Z4|B4E1Z4_HUMAN			FALSE
EESPLLIGQQSTVSDVPR	43.83	1954	18	4.2	978.015	2	20.938	124000	1430000	4960	20210526_HS_Frac4-1.raw	2	P02751|FINC_HUMAN;H0Y7Z1|H0Y7Z1_HUMAN			FALSE
EESSSGSSHAVM(+15.99)DISLPTGISANEEDLK	67.24	2905.31	28	2.2	969.451	3	21.6894	1440000	15500000	5386	20210526_HS_Frac3-2.raw	3	P01031|CO5_HUMAN	Oxidation (M)		FALSE
EFN(+0.98)AETFTFHADIC(+57.02)TLSEK	35.39	2260	19	8.1	754.349	3	23.8275	148000	893000	6625	20210526_HS_Frac2-1.raw	2	A0A0C4DGB6|A0A0C4DGB6_HUMAN;A0A087WWT3|A0A087WWT3_HUMAN;P02768|ALBU_HUMAN;C9JKR2|C9JKR2_HUMAN;D6RHD5|D6RHD5_HUMAN;B7WNR0|B7WNR0_HUMAN;H0YA55|H0YA55_HUMAN	Deamidation (NQ); Carbamidomethylation	C14:Carbamidomethylation:1000.00	FALSE
EFNAE(+21.98)TFTFHADIC(+57.02)TLSEK	37.8	2281	19	4.2	761.346	3	24.5763	119000	2040000	6880	20210526_HS_Frac2-1.raw	1	A0A0C4DGB6|A0A0C4DGB6_HUMAN;A0A087WWT3|A0A087WWT3_HUMAN;P02768|ALBU_HUMAN;C9JKR2|C9JKR2_HUMAN;D6RHD5|D6RHD5_HUMAN;B7WNR0|B7WNR0_HUMAN;H0YA55|H0YA55_HUMAN	Sodium adduct; Carbamidomethylation	E5:Sodium adduct:8.26;C14:Carbamidomethylation:1000.00	FALSE
EFNAETFTFHADIC(+57.02)TLSEK	73.29	2259.02	19	2.5	1130.52	2	24.5763	19500000	163000000	6873	20210526_HS_Frac2-1.raw	20	A0A0C4DGB6|A0A0C4DGB6_HUMAN;A0A087WWT3|A0A087WWT3_HUMAN;P02768|ALBU_HUMAN;C9JKR2|C9JKR2_HUMAN;D6RHD5|D6RHD5_HUMAN;B7WNR0|B7WNR0_HUMAN;H0YA55|H0YA55_HUMAN	Carbamidomethylation	C14:Carbamidomethylation:1000.00	FALSE
EFQLFSSPHGK	63.23	1275.62	11	-0.6	638.819	2	19.0072	17500000	218000000	3705	20210526_HS_Frac1-3.raw	34	P02787|TRFE_HUMAN			FALSE
EFQVPTFTIPK	52.88	1305.7	11	3.9	653.861	2	24.8213	4670000	40100000	6445	20210526_HS_Frac3-2.raw	8	P04114|APOB_HUMAN			FALSE
EFTPPVQAAYQK	59.42	1377.69	12	1.7	689.857	2	17.3152	2950000	20500000	3815	20210526_HS_Frac3-3.raw	5	P68871|HBB_HUMAN			FALSE
EGM(+15.99)LSIM(+15.99)SYR	43.81	1217.54	10	1.1	609.782	2	14.9088	980000	3760000	3370	20210526_HS_Frac2-3.raw	3	P01031|CO5_HUMAN	Oxidation (M); Oxidation (M)		FALSE
EGTC(+57.02)PEAPTDEC(+57.02)KPVK	37.13	1816.8	16	-2.4	606.607	3	5.6721	4490000	13300000	1076	20210526_HS_Frac2-2.raw	3	P02787|TRFE_HUMAN	Carbamidomethylation; Carbamidomethylation	C4:Carbamidomethylation:1000.00;C12:Carbamidomethylation:1000.00	FALSE
EGVQKEDIPPADLSDQVPDTESETR	80.07	2754.28	25	1.2	919.106	3	19.1596	10800000	42600000	4486	20210526_HS_Frac3-3.raw	12	P01024|CO3_HUMAN			FALSE
EGYYGYTGAFR	56.37	1282.56	11	1	642.289	2	18.2747	81700000	433000000	2976	20210526_HS_Frac5-3.raw	49	H7C5E8|H7C5E8_HUMAN;P02787|TRFE_HUMAN			FALSE
EHAVEGDC(+57.02)DFQLLK	66.08	1659.76	14	0.8	830.889	2	19.1844	6500000	72800000	4864	20210526_HS_Frac2-2.raw	11	P02765|FETUA_HUMAN;C9JV77|C9JV77_HUMAN	Carbamidomethylation	C8:Carbamidomethylation:1000.00	FALSE
EIEEVLTPEM(+15.99)LM(+15.99)R	36.37	1620.77	13	-1.4	811.395	2	20.0959	1130000	8090000	4792	20210526_HS_Frac3-1.raw	3	P29622|KAIN_HUMAN	Oxidation (M); Oxidation (M)		FALSE
EIETYHNLLEGGQ(+0.98)EDFESSGAGK	49.47	2510.11	23	7.6	837.72	3	20.8142	223000	2520000	5522	20210526_HS_Frac2-3.raw	1	K7EQQ3|K7EQQ3_HUMAN;P35527|K1C9_HUMAN	Deamidation (NQ)	Q13:Deamidation (NQ):36.87	FALSE
EIETYHNLLEGGQEDFESSGAGK	70.41	2509.12	23	2.8	837.387	3	20.9181	837000	8910000	5514	20210526_HS_Frac2-1.raw	3	K7EQQ3|K7EQQ3_HUMAN;P35527|K1C9_HUMAN			FALSE
EIGELYLPK	49.22	1060.58	9	2.5	531.301	2	19.9022	21900000	286000000	5152	20210526_HS_Frac2-3.raw	15	G3V3A0|G3V3A0_HUMAN;P01011|AACT_HUMAN			FALSE
EILSVDC(+57.02)STNNPSQAK	55.06	1761.82	16	-2.7	881.918	2	14.2746	2630000	11500000	2940	20210526_HS_Frac3-2.raw	7	P10909|CLUS_HUMAN;H0YC35|H0YC35_HUMAN	Carbamidomethylation	C7:Carbamidomethylation:1000.00	FALSE
EIM(+15.99)EN(+0.98)YNIALR	47.3	1381.65	11	4.9	691.841	2	18.3301	33900	701000	4196	20210526_HS_Frac3-3.raw	3	P08603|CFAH_HUMAN	Oxidation (M); Deamidation (NQ)	M3:Oxidation (M):1000.00;N5:Deamidation (NQ):32.28	FALSE
EIM(+15.99)ENYNIALR	53.52	1380.67	11	-3.3	691.343	2	18.4521	5790000	71000000	4041	20210526_HS_Frac4-1.raw	10	P08603|CFAH_HUMAN	Oxidation (M)		FALSE
EIPAWVPFDPAAQITK	45.36	1781.94	16	3	891.981	2	27.256	920000	9190000	7160	20210526_HS_Frac4-2.raw	5	C9JEV0|C9JEV0_HUMAN;P25311|ZA2G_HUMAN			FALSE
EIVMTQSPPTLSLSPGER	38.85	1940.99	18	9.6	971.514	2	22.0584	246000	4080000	5362	20210526_HS_Frac4-1.raw	1				FALSE
EKLQDEDLGFL	38.96	1305.65	11	2.6	653.834	2	22.1793	4350000	35200000	5566	20210526_HS_Frac3-3.raw	6	H7C5H1|H7C5H1_HUMAN;E7ETN3|E7ETN3_HUMAN;P00751|CFAB_HUMAN;B4E1Z4|B4E1Z4_HUMAN			FALSE
ELDESLQVAER	50.41	1287.63	11	-5.4	644.821	2	15.2243	8560000	54400000	3353	20210526_HS_Frac3-2.raw	10	H0YAS8|H0YAS8_HUMAN;P10909|CLUS_HUMAN;H0YC35|H0YC35_HUMAN			FALSE
ELLDTVTAPQK	49.23	1213.66	11	1.9	607.838	2	16.0035	1760000	10000000	3413	20210526_HS_Frac3-2.raw	6	I3L4Z0|I3L4Z0_HUMAN;P36955|PEDF_HUMAN			FALSE
ELLESYIDGR	38.73	1193.59	10	1.4	597.806	2	19.3689	163000	2470000	4516	20210526_HS_Frac3-1.raw	3	P00734|THRB_HUMAN;E9PIT3|E9PIT3_HUMAN			FALSE
ELSHLPSLYDYSAYR	39.8	1812.87	15	2.4	605.3	3	22.4875	90900	1300000	6134	20210526_HS_Frac2-1.raw	1	P10643|CO7_HUMAN			FALSE
ELSYYSLEDLNNK	55.87	1586.75	13	-1.8	794.382	2	20.9056	195000	2450000	5116	20210526_HS_Frac3-3.raw	3	P01031|CO5_HUMAN			FALSE
ELTTEIDNNIEQISSYK	65.21	1995.96	17	1.4	998.994	2	22.395	525000	12000000	5485	20210526_HS_Frac4-1.raw	5	#CONTAM#cont|000133|;#CONTAM#cont|000131|;P13645|K1C10_HUMAN;#CONTAM#cont|000129|;#CONTAM#cont|000136|;#CONTAM#cont|000122|;#CONTAM#cont|000130|			FALSE
EM(+15.99)SGSPASGIPVK	45.52	1274.62	13	0	638.318	2	6.9652	7000000	19400000	1614	20210526_HS_Frac2-1.raw	6		Oxidation (M)		FALSE
EN(+0.98)EGFTVTAEGK	40.48	1281.57	12	-1.3	641.795	2	7.9678	57100	820000	1718	20210526_HS_Frac3-3.raw	3	P01024|CO3_HUMAN;M0QYC8|M0QYC8_HUMAN	Deamidation (NQ)		FALSE
ENADSLQASLRPHADELK	47.89	1992.99	18	4.7	499.256	4	17.7871	131000	1760000	3436	20210526_HS_Frac1-2.raw	2	P06727|APOA4_HUMAN			FALSE
ENEGFTVTAEGK	53.85	1280.59	12	3.1	641.306	2	8.0979	332000	1240000	1718	20210526_HS_Frac3-3.raw	1	P01024|CO3_HUMAN;M0QYC8|M0QYC8_HUMAN			FALSE
ENFAGEATLQR	56.98	1234.59	11	1.6	618.308	2	13.3647	3640000	15800000	2718	20210526_HS_Frac3-3.raw	10	P04114|APOB_HUMAN			FALSE
ENFLFLTPDC(+57.02)K	55.81	1382.65	11	0.6	692.337	2	23.3704	925000	8460000	6010	20210526_HS_Frac3-2.raw	5	P01042|KNG1_HUMAN	Carbamidomethylation	C10:Carbamidomethylation:1000.00	FALSE
EPFLSC(+57.02)C(+57.02)QFAESLR	61.83	1742.78	14	1.9	872.4	2	22.9631	1620000	14500000	5870	20210526_HS_Frac3-2.raw	3		Carbamidomethylation; Carbamidomethylation	C6:Carbamidomethylation:1000.00;C7:Carbamidomethylation:1000.00	FALSE
EPQ(+0.98)VYTLPPSR	40.13	1286.65	11	6.4	644.339	2	16.7594	8880000	38900000	3744	20210526_HS_Frac3-2.raw	5	P01859|IGHG2_HUMAN;A0A4W9A917|A0A4W9A917_HUMAN;P01857|IGHG1_HUMAN;P01860|IGHG3_HUMAN;A0A286YEY4|A0A286YEY4_HUMAN;A0A0A0MS08|A0A0A0MS08_HUMAN;A0A0A0MS07|A0A0A0MS07_HUMAN;A0A286YES1|A0A286YES1_HUMAN	Deamidation (NQ)		FALSE
EPQVYTLPPSQEEM(+15.99)TK	50.59	1891.89	16	3.1	631.641	3	16.9022	14300000	34600000	3727	20210526_HS_Frac3-3.raw	9	P01861|IGHG4_HUMAN;A0A286YFJ8|A0A286YFJ8_HUMAN	Oxidation (M)		FALSE
EPQVYTLPPSR	62.26	1285.67	11	-8.1	643.838	2	16.5911	221000000	689000000	3607	20210526_HS_Frac3-3.raw	75	P01859|IGHG2_HUMAN;A0A4W9A917|A0A4W9A917_HUMAN;P01857|IGHG1_HUMAN;P01860|IGHG3_HUMAN;A0A286YEY4|A0A286YEY4_HUMAN;A0A0A0MS08|A0A0A0MS08_HUMAN;A0A0A0MS07|A0A0A0MS07_HUMAN;A0A286YES1|A0A286YES1_HUMAN			FALSE
EPQVYTLPPSRDELTK	59.24	1871.96	16	1.4	936.994	2	18.4098	48900000	245000000	4584	20210526_HS_Frac2-2.raw	28	P01857|IGHG1_HUMAN;A0A0A0MS08|A0A0A0MS08_HUMAN;A0A0A0MS07|A0A0A0MS07_HUMAN			FALSE
EPQVYTLPPSREEM(+15.99)TK	47.85	1919.93	16	1.7	640.988	3	15.8022	65600000	143000000	3780	20210526_HS_Frac2-3.raw	5	P01859|IGHG2_HUMAN;A0A4W9A917|A0A4W9A917_HUMAN;P01860|IGHG3_HUMAN;A0A286YEY4|A0A286YEY4_HUMAN;A0A286YES1|A0A286YES1_HUMAN	Oxidation (M)		FALSE
EQ(+0.98)LKAVM(+15.99)DDFAAFVEK	42.12	1856.89	16	-3.3	929.451	2	21.0236			5163	20210526_HS_Frac3-3.raw	2	A0A0C4DGB6|A0A0C4DGB6_HUMAN;A0A087WWT3|A0A087WWT3_HUMAN;P02768|ALBU_HUMAN;C9JKR2|C9JKR2_HUMAN;D6RHD5|D6RHD5_HUMAN;B7WNR0|B7WNR0_HUMAN;H0YA55|H0YA55_HUMAN	Deamidation (NQ); Oxidation (M)		FALSE
EQLGEFYEALDC(+57.02)LR	53.34	1741.8	14	2.8	871.912	2	25.8018	2370000	30100000	6750	20210526_HS_Frac3-2.raw	7	P02763|A1AG1_HUMAN	Carbamidomethylation	C12:Carbamidomethylation:1000.00	FALSE
EQLGPVTQEFWDNLEK	42.55	1931.93	16	3.6	966.977	2	25.8166	3090000	27500000	6745	20210526_HS_Frac3-2.raw	4	F8W696|F8W696_HUMAN;P02647|APOA1_HUMAN			FALSE
EQLKAVM(+15.99)DDFAAFVEK	44.32	1855.9	16	-0.1	619.644	3	23.2782	1140000	18600000	6440	20210526_HS_Frac2-2.raw	6	A0A0C4DGB6|A0A0C4DGB6_HUMAN;A0A087WWT3|A0A087WWT3_HUMAN;P02768|ALBU_HUMAN;C9JKR2|C9JKR2_HUMAN;D6RHD5|D6RHD5_HUMAN;B7WNR0|B7WNR0_HUMAN;H0YA55|H0YA55_HUMAN	Oxidation (M)		FALSE
EQLQDM(+15.99)GLVDLFSPEK	60.63	1863.89	16	2.9	932.96	2	25.0096	9430000	66700000	6389	20210526_HS_Frac4-3.raw	14	P01008|ANT3_HUMAN	Oxidation (M)		FALSE
EQLSLLDR	39.49	972.524	8	-0.3	487.271	2	16.509	21900000	125000000	3886	20210526_HS_Frac2-3.raw	8	G3V595|G3V595_HUMAN;P01011|AACT_HUMAN			FALSE
EQQALQTVC(+57.02)LK	40.1	1316.68	11	2.3	659.349	2	15.8192	94400	883000	3368	20210526_HS_Frac3-3.raw	2	P05452|TETN_HUMAN;E9PHK0|E9PHK0_HUMAN	Carbamidomethylation	C9:Carbamidomethylation:1000.00	FALSE
ESEQGVYTC(+57.02)TAQGIWK	47.82	1855.84	16	3	928.933	2	19.4304	58400	659000	4542	20210526_HS_Frac3-1.raw	1	A0A3B3ISR2|A0A3B3ISR2_HUMAN;B4DPQ0|B4DPQ0_HUMAN;P00736|C1R_HUMAN	Carbamidomethylation	C9:Carbamidomethylation:1000.00	FALSE
ESQLPTVM(+15.99)DFR	47.55	1337.63	11	2.7	669.826	2	18.8835	4180000	27100000	4330	20210526_HS_Frac3-3.raw	5	A8MUN2|A8MUN2_HUMAN;P04114|APOB_HUMAN	Oxidation (M)		FALSE
ETAASLLQAGYK	58.78	1250.65	12	2.9	626.337	2	17.9942	3080000	38700000	4427	20210526_HS_Frac2-3.raw	6	P00734|THRB_HUMAN			FALSE
ETAVDGELVVLYDVK	52.4	1648.86	15	10	825.446	2	24.1707	80600	978000	6260	20210526_HS_Frac3-1.raw	1	Q5T985|Q5T985_HUMAN;P19823|ITIH2_HUMAN			FALSE
ETLFSVM(+15.99)PGLK	45.74	1236.64	11	1.7	619.332	2	20.9285	3270000	28500000	5548	20210526_HS_Frac2-3.raw	3	Q14624|ITIH4_HUMAN;B7ZKJ8|B7ZKJ8_HUMAN;H7C0L5|H7C0L5_HUMAN	Oxidation (M)		FALSE
ETLLQDFR	46.74	1020.52	8	3.7	511.273	2	19.2976	5710000	51900000	4541	20210526_HS_Frac3-3.raw	7	P02760|AMBP_HUMAN;S4R471|S4R471_HUMAN;S4R3Y4|S4R3Y4_HUMAN			FALSE
ETYGE(+21.98)M(+15.99)ADC(+57.02)C(+57.02)AK	51.15	1471.5	12	-2.8	736.759	2	3.8959	6620000	18500000	691	20210526_HS_Frac3-2.raw	19	A0A0C4DGB6|A0A0C4DGB6_HUMAN;A0A087WWT3|A0A087WWT3_HUMAN;P02768|ALBU_HUMAN;H7C013|H7C013_HUMAN	Sodium adduct; Oxidation (M); Carbamidomethylation; Carbamidomethylation	E5:Sodium adduct:9.42;M6:Oxidation (M):1000.00;C9:Carbamidomethylation:1000.00;C10:Carbamidomethylation:1000.00	FALSE
ETYGEM(+15.99)AD(+21.98)C(+57.02)C(+57.02)AK	40.1	1471.5	12	-5.6	736.757	2	4.0223	442000	2110000	761	20210526_HS_Frac3-1.raw	1	A0A0C4DGB6|A0A0C4DGB6_HUMAN;A0A087WWT3|A0A087WWT3_HUMAN;P02768|ALBU_HUMAN;H7C013|H7C013_HUMAN	Oxidation (M); Sodium adduct; Carbamidomethylation; Carbamidomethylation	M6:Oxidation (M):1000.00;D8:Sodium adduct:0.00;C9:Carbamidomethylation:1000.00;C10:Carbamidomethylation:1000.00	FALSE
ETYGEM(+15.99)ADC(+57.02)C(+57.02)AK	71.52	1449.52	12	0.6	725.771	2	10.0723	103000000	281000000	2101	20210526_HS_Frac3-3.raw	153	A0A0C4DGB6|A0A0C4DGB6_HUMAN;A0A087WWT3|A0A087WWT3_HUMAN;P02768|ALBU_HUMAN;H7C013|H7C013_HUMAN	Oxidation (M); Carbamidomethylation; Carbamidomethylation	C9:Carbamidomethylation:1000.00;C10:Carbamidomethylation:1000.00	FALSE
EVAFDLEIPK	52.65	1159.61	10	4.2	580.818	2	22.8744	11000000	59200000	6310	20210526_HS_Frac2-3.raw	6	P19827|ITIH1_HUMAN;F8WAS2|F8WAS2_HUMAN			FALSE
EVGPTNADPVC(+57.02)LAK	62.18	1469.72	14	-7.8	735.863	2	16.9427	4620000	45200000	3704	20210526_HS_Frac3-3.raw	4	E9PFZ2|E9PFZ2_HUMAN;H7C5R1|H7C5R1_HUMAN;P00450|CERU_HUMAN	Carbamidomethylation	C11:Carbamidomethylation:1000.00	FALSE
EVGTPHGIILDSVDAAFIC(+57.02)PGSSR	64.08	2497.23	24	1.2	833.42	3	25.7972	5350000	43500000	7285	20210526_HS_Frac2-1.raw	6	P02790|HEMO_HUMAN	Carbamidomethylation	C19:Carbamidomethylation:1000.00	FALSE
EVGTVLSQVYSK	52.09	1308.69	12	-2.4	655.354	2	18.3746	2160000	27700000	4182	20210526_HS_Frac3-2.raw	6	P04114|APOB_HUMAN			FALSE
EVPLNTIIFM(+15.99)GR	41.97	1404.74	12	-5.8	703.377	2	23.565	2480000	35600000	6069	20210526_HS_Frac3-2.raw	7	P01008|ANT3_HUMAN;Q8TCE1|Q8TCE1_HUMAN	Oxidation (M)		FALSE
EVQ(+0.98)LVESGGGLVQPGGSLR	43.1	1881.98	19	4.7	942.005	2	21.2941			5083	20210526_HS_Frac4-1.raw	3		Deamidation (NQ)	Q3:Deamidation (NQ):0.00	FALSE
EVQGFESATFLGYFK	53.19	1721.83	15	4.3	861.929	2	26.6482	235000	2460000	7042	20210526_HS_Frac3-1.raw	2	A0A0A0MS51|A0A0A0MS51_HUMAN;P06396|GELS_HUMAN;A0A0A0MT01|A0A0A0MT01_HUMAN			FALSE
EVQLVE(+21.98)SGGGLVQPGGSLR	62.17	1902.98	19	2.9	635.337	3	21.0424	4900000	60300000	5005	20210526_HS_Frac4-1.raw	9		Sodium adduct	E6:Sodium adduct:51.03	FALSE
EVQLVESGGGLVQPGGSLR	73.57	1881	19	-7.1	628.004	3	20.9812	30400000	353000000	4966	20210526_HS_Frac4-3.raw	30				FALSE
EVQPVELPN(+0.98)C(+57.02)NLVK	40.99	1638.83	14	1.9	820.426	2	20.6777	71300	1510000	5036	20210526_HS_Frac3-2.raw	2	P27169|PON1_HUMAN	Deamidation (NQ); Carbamidomethylation	N9:Deamidation (NQ):14.04;C10:Carbamidomethylation:1000.00	FALSE
EVQPVELPNC(+57.02)NLVK	39.91	1637.84	14	2.6	819.934	2	20.5122	2260000	31300000	4964	20210526_HS_Frac3-1.raw	3	P27169|PON1_HUMAN	Carbamidomethylation	C10:Carbamidomethylation:1000.00	FALSE
EVSFDVELPK	42.43	1161.59	10	5.4	581.808	2	21.5996	41500	1060000	5353	20210526_HS_Frac3-2.raw	1	E7ET33|E7ET33_HUMAN;A0A087WW43|A0A087WW43_HUMAN;Q06033|ITIH3_HUMAN			FALSE
EVVADSVWVDVK	54.25	1344.69	12	-2.2	673.354	2	20.8558	4010000	49700000	5083	20210526_HS_Frac3-2.raw	14	P01024|CO3_HUMAN			FALSE
EVYGFNPEGK	40.19	1138.53	10	0.2	570.274	2	13.448	3010000	9300000	3002	20210526_HS_Frac2-1.raw	2	A8MUN2|A8MUN2_HUMAN;A0A669KB70|A0A669KB70_HUMAN;P04114|APOB_HUMAN			FALSE
EWFWDLATGTM(+15.99)K	51.57	1499.68	12	4.1	750.851	2	25.9516	828000	7250000	6817	20210526_HS_Frac3-2.raw	3	P02790|HEMO_HUMAN;Q9BS19|Q9BS19_HUMAN	Oxidation (M)		FALSE
EYC(+57.02)GVPGDGDEELLR	63.1	1707.74	15	3.9	854.884	2	18.9564	405000	3420000	4396	20210526_HS_Frac3-2.raw	3	P02760|AMBP_HUMAN	Carbamidomethylation	C3:Carbamidomethylation:1000.00	FALSE
EYESYSDFER	38.66	1323.53	10	-1.5	662.771	2	14.1979	88700	466000	2933	20210526_HS_Frac3-3.raw	1	F5GY80|F5GY80_HUMAN;P07358|CO8B_HUMAN;F5H7G1|F5H7G1_HUMAN			FALSE
EYSGTIASEAN(+0.98)TYLNSK	46.9	1847.84	17	9.1	924.94	2	19.3859	615000	5540000	4412	20210526_HS_Frac4-3.raw	2	P04114|APOB_HUMAN	Deamidation (NQ)	N11:Deamidation (NQ):28.70	FALSE
EYSGTIASEANTYLN(+0.98)SK	61.76	1847.84	17	2.2	924.934	2	18.726	478000	5430000	4140	20210526_HS_Frac4-1.raw	3	P04114|APOB_HUMAN	Deamidation (NQ)	N15:Deamidation (NQ):33.81	FALSE
EYSGTIASEANTYLNSK	66.78	1846.86	17	0.4	924.44	2	19.4098	1180000	13800000	4570	20210526_HS_Frac3-3.raw	6	P04114|APOB_HUMAN			FALSE
EYTDASFTNR	53.07	1202.52	10	2.3	602.271	2	7.2406	2610000	8220000	1489	20210526_HS_Frac2-3.raw	7	E9PFZ2|E9PFZ2_HUMAN;H7C5R1|H7C5R1_HUMAN;P00450|CERU_HUMAN			FALSE
EYVLPSFEVIVEPTEK	66.65	1877.97	16	2.8	939.996	2	26.7706	1680000	17400000	7063	20210526_HS_Frac3-2.raw	7	P01024|CO3_HUMAN			FALSE
FAC(+57.02)YYPR	47.89	975.427	7	0.7	488.723	2	13.3017	1290000	4260000	2925	20210526_HS_Frac2-3.raw	6		Carbamidomethylation	C3:Carbamidomethylation:1000.00	FALSE
FAFNLYR	42.87	929.476	7	-2.1	465.746	2	21.3633	781000	8900000	5287	20210526_HS_Frac3-2.raw	4	P05546|HEP2_HUMAN			FALSE
FAHYVVTSQVVNTANEAR	73.68	2005	18	1.7	669.345	3	18.4896	3160000	46300000	4620	20210526_HS_Frac2-3.raw	4	P19827|ITIH1_HUMAN;F8WAS2|F8WAS2_HUMAN			FALSE
FATTFYQHLADSK	67.26	1527.74	13	1.6	764.88	2	19.3981	6690000	78900000	4967	20210526_HS_Frac2-2.raw	12	P01008|ANT3_HUMAN;Q8TCE1|Q8TCE1_HUMAN			FALSE
FC(+57.02)GQLGSPLGNPPGK	61.69	1527.75	15	0.5	764.885	2	18.5433	275000	3470000	4270	20210526_HS_Frac3-3.raw	3	A0A3B3ISR2|A0A3B3ISR2_HUMAN;B4DPQ0|B4DPQ0_HUMAN;P00736|C1R_HUMAN	Carbamidomethylation	C2:Carbamidomethylation:1000.00	FALSE
FDEFFSE(+21.98)GC(+57.02)APGSK	63.36	1598.63	14	1.9	800.328	2	19.4098	1430000	23100000	4567	20210526_HS_Frac3-3.raw	8	H7C5E8|H7C5E8_HUMAN;P02787|TRFE_HUMAN	Sodium adduct; Carbamidomethylation	E7:Sodium adduct:14.15;C9:Carbamidomethylation:1000.00	FALSE
FDEFFSEGC(+57.02)APGSK	77.61	1576.65	14	3.8	789.335	2	19.4875	23500000	400000000	3227	20210526_HS_Frac5-3.raw	49	H7C5E8|H7C5E8_HUMAN;P02787|TRFE_HUMAN	Carbamidomethylation	C9:Carbamidomethylation:1000.00	FALSE
FDHVITNM(+15.99)NNNYEPR	53.37	1878.83	15	2.6	627.289	3	14.4545	1470000	7010000	3274	20210526_HS_Frac2-2.raw	3	A0A0A0MSV6|A0A0A0MSV6_HUMAN;P02746|C1QB_HUMAN;D6R934|D6R934_HUMAN	Oxidation (M)		FALSE
FDPVRGEVPPR	48.45	1267.67	11	0	423.563	3	15.6344	1340000	1690000	2893	20210526_HS_Frac1-3.raw	3	P02790|HEMO_HUMAN;Q9BS19|Q9BS19_HUMAN			FALSE
FEDGVLDPDYPR	57.37	1421.65	12	-0.4	711.833	2	19.2353	4830000	47500000	4379	20210526_HS_Frac4-2.raw	14	P04004|VTNC_HUMAN			FALSE
FEVQVTVPK	52.47	1045.58	9	4.6	523.802	2	19.2976	1460000	18300000	4547	20210526_HS_Frac3-3.raw	10	P01023|A2MG_HUMAN			FALSE
FFESFGDLSTPDAVM(+15.99)GNPK	68.64	2073.94	19	1.5	1037.98	2	23.4011	1140000	10800000	5864	20210526_HS_Frac4-1.raw	6	F8W6P5|F8W6P5_HUMAN;P68871|HBB_HUMAN;A0A2R8Y7R2|A0A2R8Y7R2_HUMAN	Oxidation (M)		FALSE
FISLGEAC(+57.02)K	42.41	1023.51	9	0.2	512.763	2	16.1006	339000	2450000	3753	20210526_HS_Frac2-3.raw	2	P01024|CO3_HUMAN	Carbamidomethylation	C8:Carbamidomethylation:1000.00	FALSE
FKDLGEENFK	62.02	1225.6	10	6.6	613.81	2	14.4748	166000000	786000000	2763	20210526_HS_Frac1-3.raw	121	A0A0C4DGB6|A0A0C4DGB6_HUMAN;A0A087WWT3|A0A087WWT3_HUMAN;P02768|ALBU_HUMAN;H7C013|H7C013_HUMAN;C9JKR2|C9JKR2_HUMAN;B7WNR0|B7WNR0_HUMAN			FALSE
FLC(+57.02)TGGVSPYADPNTC(+57.02)R	43.3	1913.84	17	1.4	957.932	2	18.6152	782000	8260000	4232	20210526_HS_Frac3-1.raw	3	H7C5H1|H7C5H1_HUMAN;E7ETN3|E7ETN3_HUMAN;P00751|CFAB_HUMAN;B4E1Z4|B4E1Z4_HUMAN	Carbamidomethylation; Carbamidomethylation	C3:Carbamidomethylation:1000.00;C16:Carbamidomethylation:1000.00	FALSE
FLEQQNQ(+0.98)VLQTK	46.1	1475.76	12	2.4	738.893	2	15.9836	41300	481000	3426	20210526_HS_Frac3-3.raw	1	#CONTAM#cont|000132|;P35908|K22E_HUMAN;#CONTAM#cont|000135|;#CONTAM#cont|000134|;P04264|K2C1_HUMAN	Deamidation (NQ)	Q7:Deamidation (NQ):0.00	FALSE
FLEQQNQVLQTK	63.26	1474.78	12	1.8	738.401	2	16.0772	4070000	36900000	3746	20210526_HS_Frac2-3.raw	13	#CONTAM#cont|000132|;P35908|K22E_HUMAN;#CONTAM#cont|000135|;#CONTAM#cont|000134|;P04264|K2C1_HUMAN			FALSE
FLVNLVK	36.9	831.522	7	1.4	416.771	2	20.7076	647000	6480000	5478	20210526_HS_Frac2-3.raw	3	P43652|AFAM_HUMAN			FALSE
FM(+15.99)QAVTGWK	45.81	1082.52	9	1.3	542.271	2	15.1752	1340000	5150000	3443	20210526_HS_Frac2-3.raw	2	P01019|ANGT_HUMAN	Oxidation (M)		FALSE
FN(+0.98)AVLTNPQGDYDTSTGK	48.15	1927.88	18	5.7	964.956	2	18.0122	189000	2580000	3875	20210526_HS_Frac4-1.raw	2	P02747|C1QC_HUMAN	Deamidation (NQ)	N2:Deamidation (NQ):25.58	FALSE
FN(+0.98)WYVDGVEVHNAK	53.11	1677.78	14	2.4	560.271	3	20.8421	2460000	19900000	5535	20210526_HS_Frac2-3.raw	4	P01857|IGHG1_HUMAN;A0A0A0MS08|A0A0A0MS08_HUMAN	Deamidation (NQ)	N2:Deamidation (NQ):72.22	FALSE
FNALQYLR	37.13	1023.55	8	0.8	512.785	2	21.7799	140000	1540000	5882	20210526_HS_Frac2-2.raw	1				FALSE
FNAVLTNPQGDYDTSTGK	69.88	1926.9	18	2.3	964.461	2	18.1651	1520000	16000000	4116	20210526_HS_Frac3-3.raw	3	P02747|C1QC_HUMAN			FALSE
FNWYVDGVEVHN(+0.98)AK	66.19	1677.78	14	3.2	839.903	2	21.7393	8540000	86000000	5874	20210526_HS_Frac2-3.raw	4	P01857|IGHG1_HUMAN;A0A0A0MS08|A0A0A0MS08_HUMAN	Deamidation (NQ)	N12:Deamidation (NQ):107.28	FALSE
FNWYVDGVEVHNAK	68.22	1676.79	14	1.8	839.409	2	21.3893	44500000	368000000	5741	20210526_HS_Frac2-2.raw	73	P01857|IGHG1_HUMAN;A0A0A0MS08|A0A0A0MS08_HUMAN			FALSE
FPEVDVLTK	53.83	1046.56	9	0.5	524.292	2	20.0201	9990000	88400000	5205	20210526_HS_Frac2-2.raw	6	P04114|APOB_HUMAN			FALSE
FPKAEFAEVSK	63.37	1251.65	11	1.1	418.224	3	17.0681	1270000	11800000	3225	20210526_HS_Frac1-2.raw	9	A0A0C4DGB6|A0A0C4DGB6_HUMAN;P02768|ALBU_HUMAN;C9JKR2|C9JKR2_HUMAN;D6RHD5|D6RHD5_HUMAN;B7WNR0|B7WNR0_HUMAN;H0YA55|H0YA55_HUMAN			FALSE
FPSGTFEQVSQLVK	62.74	1565.81	14	4.6	783.918	2	23.6749	1010000	8900000	6123	20210526_HS_Frac3-2.raw	3	D6RBJ7|D6RBJ7_HUMAN;P02774|VTDB_HUMAN;D6RF20|D6RF20_HUMAN;D6RF35|D6RF35_HUMAN			FALSE
FQFPGKPGIYTR	57.25	1409.75	12	3.3	470.924	3	20.2248	249000	2540000	4046	20210526_HS_Frac1-2.raw	2	P04114|APOB_HUMAN			FALSE
FQN(+0.98)ALLVR	52.45	960.539	8	0.4	481.279	2	18.0921	53000000	853000000	4456	20210526_HS_Frac2-3.raw	20	A0A0C4DGB6|A0A0C4DGB6_HUMAN;A0A087WWT3|A0A087WWT3_HUMAN;P02768|ALBU_HUMAN;C9JKR2|C9JKR2_HUMAN;D6RHD5|D6RHD5_HUMAN;B7WNR0|B7WNR0_HUMAN;H0YA55|H0YA55_HUMAN	Deamidation (NQ)	N3:Deamidation (NQ):15.91	FALSE
FQNALLVR	61.85	959.555	8	1.3	480.788	2	22.1521	1710000000	7150000000	6042	20210526_HS_Frac2-3.raw	342	A0A0C4DGB6|A0A0C4DGB6_HUMAN;A0A087WWT3|A0A087WWT3_HUMAN;P02768|ALBU_HUMAN;C9JKR2|C9JKR2_HUMAN;D6RHD5|D6RHD5_HUMAN;B7WNR0|B7WNR0_HUMAN;H0YA55|H0YA55_HUMAN			FALSE
FQNSAILTIQPK	59.37	1358.76	12	4.4	680.39	2	19.864	644000	11300000	4748	20210526_HS_Frac3-3.raw	6	P01031|CO5_HUMAN			FALSE
FQPTLLTLPR	64.64	1184.69	10	4.1	593.358	2	23.5916	20100000	228000000	6072	20210526_HS_Frac3-3.raw	13	H9KV48|H9KV48_HUMAN;P05155|IC1_HUMAN;E9PGN7|E9PGN7_HUMAN			FALSE
FQSVFTVTR	52.54	1083.57	9	3.2	542.797	2	18.9245	661000	10700000	4785	20210526_HS_Frac2-3.raw	5	P02747|C1QC_HUMAN			FALSE
FSAIC(+57.02)QGDGTWSPR	69.77	1580.7	14	2.8	791.364	2	18.7104	1360000	14800000	4306	20210526_HS_Frac3-3.raw	4	P04003|C4BPA_HUMAN	Carbamidomethylation	C5:Carbamidomethylation:1000.00	FALSE
FSGQLNSHGC(+57.02)FYQQVK	60.92	1898.87	16	4.9	633.971	3	17.7208	5440000	56000000	4334	20210526_HS_Frac2-3.raw	4	P01023|A2MG_HUMAN	Carbamidomethylation	C10:Carbamidomethylation:1000.00	FALSE
FSGSGAGTDFTLK	37.22	1286.61	13	-3.2	644.315	2	17.2366	358000	4340000	4158	20210526_HS_Frac2-3.raw	1				FALSE
FSGSGSGTD(+21.98)FTLTISR	35.52	1653.76	16	2.5	552.264	3	20.6616	30500	371000	4997	20210526_HS_Frac3-1.raw	1		Sodium adduct	D9:Sodium adduct:56.54	FALSE
FSGSGSGTDFTLK	60.88	1302.61	13	3.6	652.317	2	16.5027	28800000	168000000	3882	20210526_HS_Frac2-3.raw	11				FALSE
FSGSGSGTDFTLTISR	66.32	1631.78	16	4.2	816.9	2	20.8775	7190000	49800000	3588	20210526_HS_Frac5-1.raw	8				FALSE
FSGSN(+0.98)SGNTATLTISR	67.02	1612.77	16	2	807.396	2	15.5354	2900000	8890000	3134	20210526_HS_Frac4-1.raw	6		Deamidation (NQ)	N5:Deamidation (NQ):47.09	FALSE
FSGSNSGN(+0.98)TATLTISR	52.69	1612.77	16	4	807.398	2	15.8933	682000	1560000	3502	20210526_HS_Frac3-2.raw	1		Deamidation (NQ)	N8:Deamidation (NQ):0.00	FALSE
FSGSNSGNTATLTISR	69.32	1611.79	16	0.5	806.903	2	15.416	5450000	27700000	3218	20210526_HS_Frac3-3.raw	6				FALSE
FSPATHPSEGLEENYC(+57.02)R	60.37	1992.86	17	0.6	665.298	3	15.9618	1780000	17400000	3703	20210526_HS_Frac2-1.raw	4	P00747|PLMN_HUMAN	Carbamidomethylation	C16:Carbamidomethylation:1000.00	FALSE
FTC(+57.02)TVTHTDLPSPLK	74.88	1715.86	15	2.7	858.941	2	19.5986	6570000	64000000	5038	20210526_HS_Frac2-3.raw	6	P01871|IGHM_HUMAN	Carbamidomethylation	C3:Carbamidomethylation:1000.00	FALSE
FTFEYSR	44.71	948.434	7	0.7	475.226	2	16.81	925000	9360000	4013	20210526_HS_Frac2-2.raw	2	P43652|AFAM_HUMAN			FALSE
FYNQVSTPLLR	65.64	1336.71	11	2.4	669.368	2	20.4768	3610000	32200000	4953	20210526_HS_Frac3-3.raw	12	#CONTAM#cont|000108|;Q5T985|Q5T985_HUMAN;P19823|ITIH2_HUMAN			FALSE
FYYIYNEK	57.95	1138.53	8	0.5	570.277	2	17.8227	17700000	99200000	4355	20210526_HS_Frac2-3.raw	15	P01024|CO3_HUMAN			FALSE
GAYPLSIEPIGVR	63.81	1370.76	13	3.6	686.391	2	22.8241	12700000	133000000	6285	20210526_HS_Frac2-3.raw	13	E9PFZ2|E9PFZ2_HUMAN;H7C5R1|H7C5R1_HUMAN;P00450|CERU_HUMAN			FALSE
GC(+57.02)PDVQASLPDAK	50.06	1356.63	13	-0.4	679.327	2	15.1429	521000	2370000	3203	20210526_HS_Frac3-2.raw	3	Q96PD5|PGRP2_HUMAN	Carbamidomethylation	C2:Carbamidomethylation:1000.00	FALSE
GDATVFFILPNQGK	53.94	1505.79	14	4.1	753.907	2	24.8779	262000	4050000	6472	20210526_HS_Frac3-3.raw	2	P29622|KAIN_HUMAN			FALSE
GDAVC(+57.02)TESGWRPLPSC(+57.02)EEK	59.06	2176.95	19	2.1	726.662	3	17.9555	846000	9040000	4378	20210526_HS_Frac2-1.raw	3	A0A0D9SG88|A0A0D9SG88_HUMAN;P08603|CFAH_HUMAN;Q5TFM2|Q5TFM2_HUMAN	Carbamidomethylation; Carbamidomethylation	C5:Carbamidomethylation:1000.00;C16:Carbamidomethylation:1000.00	FALSE
GDDITM(+15.99)VLILPKPEK	39.52	1683.91	15	3.3	842.969	2	22.7253	165000	1840000	6230	20210526_HS_Frac2-2.raw	1	P01008|ANT3_HUMAN	Oxidation (M)		FALSE
GDTFSC(+57.02)M(+15.99)VGHEALPLAFTQK	57.4	2224.03	20	0.1	742.354	3	23.1267	4170000	42500000	6386	20210526_HS_Frac2-3.raw	6	P01876|IGHA1_HUMAN;A0A286YEY1|A0A286YEY1_HUMAN	Carbamidomethylation; Oxidation (M)	C6:Carbamidomethylation:1000.00	FALSE
GDVAFVK	37.87	734.396	7	1.1	735.408	1	7.0466	4450000	6390000	1488	20210526_HS_Frac2-3.raw	5	H7C5E8|H7C5E8_HUMAN;P02787|TRFE_HUMAN			FALSE
GEC(+57.02)Q(+0.98)AEGVLFFQGDR	44.79	1712.75	15	9.4	857.391	2	21.6873	949000	8370000	5551	20210526_HS_Frac3-2.raw	4	P02790|HEMO_HUMAN;Q9BS19|Q9BS19_HUMAN	Carbamidomethylation; Deamidation (NQ)	C3:Carbamidomethylation:1000.00;Q4:Deamidation (NQ):64.00	FALSE
GEC(+57.02)QAE(+21.98)GVLFFQGDR	51.93	1733.74	15	3.9	578.926	3	21.5247	242000	3490000	5331	20210526_HS_Frac3-3.raw	4	P02790|HEMO_HUMAN;Q9BS19|Q9BS19_HUMAN	Carbamidomethylation; Sodium adduct	C3:Carbamidomethylation:1000.00;E6:Sodium adduct:33.81	FALSE
GEC(+57.02)QAEGVLFFQGDR	63.96	1711.76	15	2.8	856.894	2	21.5247	3560000	38300000	5312	20210526_HS_Frac3-3.raw	18	P02790|HEMO_HUMAN;Q9BS19|Q9BS19_HUMAN	Carbamidomethylation	C3:Carbamidomethylation:1000.00	FALSE
GEC(+57.02)VPGEQEPEPILIPR	65.69	1918.95	17	3	960.486	2	21.6191	637000	7830000	5374	20210526_HS_Frac3-3.raw	3	P02760|AMBP_HUMAN;S4R471|S4R471_HUMAN	Carbamidomethylation	C3:Carbamidomethylation:1000.00	FALSE
GEFYIGSK	41.19	899.439	8	1	450.729	2	11.3157	683000	2040000	2443	20210526_HS_Frac2-3.raw	7	E9PFZ2|E9PFZ2_HUMAN;H7C5R1|H7C5R1_HUMAN;P00450|CERU_HUMAN			FALSE
GEVLDNSFTGGIC(+57.02)K	62.2	1495.7	14	1.9	748.86	2	18.6932	260000	4230000	4312	20210526_HS_Frac3-3.raw	3	P13671|CO6_HUMAN	Carbamidomethylation	C13:Carbamidomethylation:1000.00	FALSE
GEVQAM(+15.99)LGQSTEELR	62.9	1662.79	15	2.1	832.406	2	16.6721	1950000	17900000	3608	20210526_HS_Frac3-2.raw	6	E7ERP7|E7ERP7_HUMAN;E9PEV4|E9PEV4_HUMAN;P02649|APOE_HUMAN;H0Y7L5|H0Y7L5_HUMAN	Oxidation (M)		FALSE
GFEPTLEALFGK	55.91	1307.68	12	0.7	654.849	2	26.7226	2600000	24400000	7560	20210526_HS_Frac2-3.raw	6	A8MUN2|A8MUN2_HUMAN;P04114|APOB_HUMAN			FALSE
GFSLDEATNLN(+0.98)GGLLR	50.53	1676.84	16	4.3	839.432	2	24.1167	633000	7120000	6253	20210526_HS_Frac3-2.raw	4	P19827|ITIH1_HUMAN	Deamidation (NQ)	N11:Deamidation (NQ):32.28	FALSE
GFYPSDIAVE(+21.98)WESN(+0.98)GQPENNYK	28.51	2566.09	22	4.6	856.378	3	24.0411	141000	1710000	6168	20210526_HS_Frac4-2.raw	1	P01857|IGHG1_HUMAN;P01861|IGHG4_HUMAN;A0A0A0MS08|A0A0A0MS08_HUMAN;A0A286YFJ8|A0A286YFJ8_HUMAN;A0A0A0MS07|A0A0A0MS07_HUMAN	Sodium adduct; Deamidation (NQ)	E10:Sodium adduct:11.01;N14:Deamidation (NQ):9.40	FALSE
GFYPSDIAVEWE(+21.98)SN(+0.98)GQPENNYK	44.96	2566.09	22	1.6	856.375	3	24.1677	251000	2790000	6147	20210526_HS_Frac4-1.raw	1	P01857|IGHG1_HUMAN;P01861|IGHG4_HUMAN;A0A0A0MS08|A0A0A0MS08_HUMAN;A0A286YFJ8|A0A286YFJ8_HUMAN;A0A0A0MS07|A0A0A0MS07_HUMAN	Sodium adduct; Deamidation (NQ)	E12:Sodium adduct:0.00;N14:Deamidation (NQ):14.04	FALSE
GFYPSDIAVEWESN(+0.98)GQPENNYK	33.91	2544.11	22	-9.1	849.039	3	24.3423			6213	20210526_HS_Frac4-1.raw	1	P01857|IGHG1_HUMAN;P01861|IGHG4_HUMAN;A0A0A0MS08|A0A0A0MS08_HUMAN;A0A286YFJ8|A0A286YFJ8_HUMAN;A0A0A0MS07|A0A0A0MS07_HUMAN	Deamidation (NQ)	N14:Deamidation (NQ):14.04	FALSE
GGETAQSADPQWEQLNNK	53.44	1971.89	18	1.4	986.958	2	16.1898	450000	4070000	3475	20210526_HS_Frac3-2.raw	3	P05546|HEP2_HUMAN			FALSE
GGTLGTPQTGSENDALYEYLR	38.28	2241.05	21	2.1	1121.54	2	23.0531	47800	653000	5753	20210526_HS_Frac4-3.raw	2	P05452|TETN_HUMAN;E9PHK0|E9PHK0_HUMAN			FALSE
GGYTLVSGYPK	56.03	1140.58	11	1.1	571.301	2	17.2276	25000000	199000000	3788	20210526_HS_Frac3-3.raw	15	P02790|HEMO_HUMAN			FALSE
GHFSISIPVK	64.39	1083.61	10	6.6	542.815	2	20.5303	2340000	26200000	4083	20210526_HS_Frac1-3.raw	13	H0YFH1|H0YFH1_HUMAN;P01023|A2MG_HUMAN			FALSE
GHLFLQTDQPIYNPGQR	71.56	1983	17	3.3	662.01	3	20.9537	669000	6320000	5527	20210526_HS_Frac2-1.raw	1				FALSE
GIISALLVPPETEEAK	64.81	1665.92	16	4.3	556.318	3	24.9906	1150000	4870000	6522	20210526_HS_Frac3-3.raw	3	A8MUN2|A8MUN2_HUMAN;P04114|APOB_HUMAN			FALSE
GISTSAASPAVGTVGM(+15.99)D(+21.98)M(+15.99)DEDDDFSK	65.76	2656.08	26	2	886.372	3	18.1596	1240000	16400000	3968	20210526_HS_Frac4-2.raw	3	P04114|APOB_HUMAN	Oxidation (M); Sodium adduct; Oxidation (M)	M16:Oxidation (M):1000.00;D17:Sodium adduct:26.31;M18:Oxidation (M):1000.00	FALSE
GISTSAASPAVGTVGM(+15.99)DM(+15.99)DEDDDFSK	56.09	2634.09	26	1.2	879.043	3	18.152	1180000	13700000	3927	20210526_HS_Frac4-3.raw	3	P04114|APOB_HUMAN	Oxidation (M); Oxidation (M)		FALSE
GLC(+57.02)VATPVQLR	60.82	1212.66	11	4	607.344	2	19.8315	5460000	46900000	5093	20210526_HS_Frac2-1.raw	3		Carbamidomethylation	C3:Carbamidomethylation:1000.00	FALSE
GLETSLAEC(+57.02)TFTK	59.31	1455.69	13	1.4	728.857	2	19.3479	843000	12900000	4549	20210526_HS_Frac3-3.raw	3	G3XAM2|G3XAM2_HUMAN;A0A2R8Y3M9|A0A2R8Y3M9_HUMAN;A0A087X0I2|A0A087X0I2_HUMAN;E7ETH0|E7ETH0_HUMAN;P05156|CFAI_HUMAN	Carbamidomethylation	C9:Carbamidomethylation:1000.00	FALSE
GLEVTITAR	52.98	958.545	9	-0.7	480.281	2	16.0162	4910000	17800000	3710	20210526_HS_Frac2-1.raw	4	P01024|CO3_HUMAN			FALSE
GLEWLGR	38.94	829.445	7	-2.2	415.73	2	17.9622	380000	1900000	4320	20210526_HS_Frac2-2.raw	5				FALSE
GLEWM(+15.99)GIIYPGDSDTR	38.94	1824.84	16	7	913.434	2	24.0045	417000	3530000	6211	20210526_HS_Frac3-2.raw	4	A0A0C4DH38|HV551_HUMAN	Oxidation (M)		FALSE
GLEWVANIK	41.41	1028.57	9	0.6	515.292	2	21.17	729000	8540000	5704	20210526_HS_Frac2-2.raw	1				FALSE
GLEWVGFIR	43.46	1075.58	9	3.4	538.802	2	25.35	626000	4720000	7121	20210526_HS_Frac2-2.raw	3				FALSE
GM(+15.99)ADQDGLKPTIDKPSEDSPPLEM(+15.99)LGPR	56.99	3025.44	28	1.3	757.371	4	20.3412	5560000	48000000	5330	20210526_HS_Frac2-3.raw	3	P19827|ITIH1_HUMAN	Oxidation (M); Oxidation (M)		FALSE
GM(+15.99)TRPLSTLISSSQSC(+57.02)QYTLDAK	57.52	2559.23	23	2.3	854.089	3	21.382	687000	10500000	5706	20210526_HS_Frac2-1.raw	3	A8MUN2|A8MUN2_HUMAN;P04114|APOB_HUMAN	Oxidation (M); Carbamidomethylation	C16:Carbamidomethylation:1000.00	FALSE
GPDVLTATVSGK	66.6	1143.61	12	3.8	572.818	2	14.8098	2700000	10600000	3087	20210526_HS_Frac3-3.raw	6	Q14624|ITIH4_HUMAN;B7ZKJ8|B7ZKJ8_HUMAN;H7C0L5|H7C0L5_HUMAN			FALSE
GPEVQLVAHSPWLK	69.54	1559.85	14	1.5	780.935	2	22.2371	1070000	14000000	6080	20210526_HS_Frac2-3.raw	6				FALSE
GPLDQLEK	41.98	898.476	8	-1.2	450.247	2	11.4294	1540000	3390000	2592	20210526_HS_Frac2-3.raw	7	P05546|HEP2_HUMAN			FALSE
GPSVFPLAPC(+57.02)SR	67.49	1286.64	12	-5.2	644.328	2	20.2086	42100000	599000000	4872	20210526_HS_Frac3-3.raw	16	P01859|IGHG2_HUMAN;A0A4W9A917|A0A4W9A917_HUMAN;P01861|IGHG4_HUMAN;P01860|IGHG3_HUMAN;A0A286YEY4|A0A286YEY4_HUMAN;A0A286YFJ8|A0A286YFJ8_HUMAN;A0A286YES1|A0A286YES1_HUMAN	Carbamidomethylation	C10:Carbamidomethylation:1000.00	FALSE
GPSVFPLAPSSK	67.02	1185.64	12	-2.8	593.827	2	19.4069	281000000	1500000000	4539	20210526_HS_Frac3-3.raw	105	P01857|IGHG1_HUMAN;A0A0A0MS08|A0A0A0MS08_HUMAN;A0A0A0MS07|A0A0A0MS07_HUMAN			FALSE
GPSVFPLAPSSKSTSGGTAALGC(+57.02)LVK	57.91	2488.3	26	5.9	830.448	3	24.5763	381000	3120000	6857	20210526_HS_Frac2-1.raw	2	P01857|IGHG1_HUMAN;A0A0A0MS08|A0A0A0MS08_HUMAN;A0A0A0MS07|A0A0A0MS07_HUMAN	Carbamidomethylation	C23:Carbamidomethylation:1000.00	FALSE
GQELC(+57.02)ADYSENTFTEYK	75.46	2053.86	17	2.2	1027.94	2	19.2599	1680000	23700000	4499	20210526_HS_Frac3-2.raw	6	P02774|VTDB_HUMAN;D6RF35|D6RF35_HUMAN	Carbamidomethylation	C5:Carbamidomethylation:1000.00	FALSE
GQELC(+57.02)ADYSENTFTEYKK	56.41	2181.95	18	2	728.329	3	18.2473	348000	5300000	4493	20210526_HS_Frac2-1.raw	3	P02774|VTDB_HUMAN;D6RF35|D6RF35_HUMAN	Carbamidomethylation	C5:Carbamidomethylation:1000.00	FALSE
GQGTLSVVTM(+15.99)YHAK	51.77	1506.75	14	3.4	754.388	2	15.987	11200000	63700000	3724	20210526_HS_Frac2-2.raw	7	P01024|CO3_HUMAN;M0QYC8|M0QYC8_HUMAN	Oxidation (M)		FALSE
GQYC(+57.02)YELDEK	38.2	1303.54	10	0	652.78	2	11.8865	998000	2160000	2729	20210526_HS_Frac2-3.raw	1	P04004|VTNC_HUMAN	Carbamidomethylation	C4:Carbamidomethylation:1000.00	FALSE
GSFEFPVGDAVSK	56.57	1338.65	13	-4	670.33	2	20.7788	7300000	79700000	5044	20210526_HS_Frac3-2.raw	11				FALSE
GSFPWQAK	53.49	919.455	8	-1.9	460.736	2	16.893	39100000	371000000	4180	20210526_HS_Frac2-1.raw	28	P00738|HPT_HUMAN;A0A0A0MRD9|A0A0A0MRD9_HUMAN;A0A087WU08|A0A087WU08_HUMAN;H0Y300|H0Y300_HUMAN;A0A0C4DGL8|A0A0C4DGL8_HUMAN;J3QR68|J3QR68_HUMAN;P00739|HPTR_HUMAN			FALSE
GSLGGGFSSGGFSGGSFSR	42.41	1706.76	19	0.8	854.393	2	20.0652	1590000	22800000	4807	20210526_HS_Frac3-3.raw	5	#CONTAM#cont|000133|;P13645|K1C10_HUMAN;#CONTAM#cont|000129|;#CONTAM#cont|000136|;#CONTAM#cont|000122|			FALSE
GSLVQASEANLQAAQDFVR	74.49	2003.01	19	1.4	1002.52	2	23.5613	2970000	31900000	5977	20210526_HS_Frac4-2.raw	12	P19827|ITIH1_HUMAN			FALSE
GSPAINVAVHVFR	62.74	1365.75	13	2.6	456.259	3	21.3693	2770000	26500000	4321	20210526_HS_Frac1-2.raw	8	P02766|TTHY_HUMAN;A0A087WT59|A0A087WT59_HUMAN			FALSE
GSSTWLTAFVLK	47.74	1308.71	12	0.8	655.364	2	27.237	295000	3630000	7718	20210526_HS_Frac2-2.raw	3				FALSE
GTE(+21.98)AAGAM(+15.99)FLEAIPM(+15.99)SIPPEVK	35.76	2312.1	22	4	771.712	3	26.1085	155000	597000	4887	20210526_HS_Frac5-1.raw	1		Sodium adduct; Oxidation (M); Oxidation (M)	E3:Sodium adduct:0.00;M8:Oxidation (M):1000.00;M15:Oxidation (M):1000.00	FALSE
GTEAAGAM(+15.99)FLE(+21.98)AIPM(+15.99)SIPPEVK	50.41	2312.1	22	-7.3	771.706	3	26.1747	1390000	8930000	6732	20210526_HS_Frac4-1.raw	3		Oxidation (M); Sodium adduct; Oxidation (M)	M8:Oxidation (M):1000.00;E11:Sodium adduct:11.64;M15:Oxidation (M):1000.00	FALSE
GTEAAGAM(+15.99)FLEAIPM(+15.99)SIPPEVK	59.65	2290.12	22	-4.2	764.381	3	25.9524	37300000	195000000	6724	20210526_HS_Frac4-1.raw	10		Oxidation (M); Oxidation (M)		FALSE
GTFATLSELHC(+57.02)DK	57.14	1477.69	13	0.9	739.855	2	17.994	121000	1990000	4431	20210526_HS_Frac2-3.raw	3	P68871|HBB_HUMAN;A0A2R8Y7R2|A0A2R8Y7R2_HUMAN	Carbamidomethylation	C11:Carbamidomethylation:1000.00	FALSE
GTWTQPFDLASTR	39.42	1478.72	13	-1.3	740.366	2	22.13	244000	2460000	5520	20210526_HS_Frac3-1.raw	1	P08185|CBG_HUMAN			FALSE
GVALHRPDVYLLPPAR	62.69	1773	16	4.4	444.26	4	21.623	607000	3770000	4383	20210526_HS_Frac1-2.raw	5	P01871|IGHM_HUMAN			FALSE
GVTSVSQIFHSPDLAIR	51.92	1825.97	17	-1.3	609.665	3	24.421	12700000	123000000	6819	20210526_HS_Frac2-1.raw	8	H9KV48|H9KV48_HUMAN;P05155|IC1_HUMAN;E9PGN7|E9PGN7_HUMAN			FALSE
GWVDLFVPK	43.4	1059.58	9	3.5	530.798	2	25.6959	149000	1430000	7255	20210526_HS_Frac2-1.raw	3	#CONTAM#cont|000072|;P05543|THBG_HUMAN			FALSE
GWVTDGFSSLK	52.8	1195.59	11	0.5	598.804	2	21.3781	460000	5340000	5742	20210526_HS_Frac2-3.raw	2	P02656|APOC3_HUMAN;B0YIW2|B0YIW2_HUMAN			FALSE
GYTQQLAFR	63.1	1082.55	9	1.2	542.285	2	16.4886	18200000	151000000	3561	20210526_HS_Frac3-3.raw	14	P01024|CO3_HUMAN			FALSE
HLSLLTTLSNR	74.47	1253.71	11	2.9	418.912	3	20.594	151000	1060000	4088	20210526_HS_Frac1-1.raw	2	D6RBJ7|D6RBJ7_HUMAN;P02774|VTDB_HUMAN;D6RF35|D6RF35_HUMAN			FALSE
HNVYIN(+0.98)GITYTPVSSTNEK	73.87	2137.03	19	-0.4	713.354	3	19.1627	9770000	82500000	4881	20210526_HS_Frac2-3.raw	11	P01023|A2MG_HUMAN	Deamidation (NQ)	N6:Deamidation (NQ):49.79	FALSE
HPDYSVVLLLR	58.88	1310.73	11	0	437.92	3	23.7116	1040000	8310000	6576	20210526_HS_Frac2-1.raw	6	A0A0C4DGB6|A0A0C4DGB6_HUMAN;P02768|ALBU_HUMAN;C9JKR2|C9JKR2_HUMAN;D6RHD5|D6RHD5_HUMAN;B7WNR0|B7WNR0_HUMAN;H0YA55|H0YA55_HUMAN			FALSE
HPYFYAPELLFFAK	66.31	1741.89	14	3.1	581.64	3	29.5694	599000	3040000	8344	20210526_HS_Frac2-1.raw	2	A0A0C4DGB6|A0A0C4DGB6_HUMAN;P02768|ALBU_HUMAN;H7C013|H7C013_HUMAN;D6RHD5|D6RHD5_HUMAN;B7WNR0|B7WNR0_HUMAN;H0YA55|H0YA55_HUMAN			FALSE
HQFLLTGDTQGR	53.26	1371.69	12	-0.2	458.237	3	15.075	92600	755000	2768	20210526_HS_Frac1-2.raw	2	P04217|A1BG_HUMAN;M0R009|M0R009_HUMAN			FALSE
HQPQEFPTYVEPTNDEIC(+57.02)EAFR	70.27	2706.2	22	0	903.079	3	23.5031	2150000	23900000	6527	20210526_HS_Frac2-3.raw	5	D6RBJ7|D6RBJ7_HUMAN;P02774|VTDB_HUMAN;D6RF35|D6RF35_HUMAN	Carbamidomethylation	C18:Carbamidomethylation:1000.00	FALSE
HSTIFENLANK	73.35	1272.65	11	3.3	637.332	2	17.16	27800000	188000000	3231	20210526_HS_Frac1-3.raw	35	C9JVG0|C9JVG0_HUMAN;P02787|TRFE_HUMAN			FALSE
HTFM(+15.99)GVVSLGSPSGEVSHPR	72.71	2096.01	20	0.8	699.678	3	18.8762	231000	2640000	3624	20210526_HS_Frac1-1.raw	2	P02765|FETUA_HUMAN;C9JV77|C9JV77_HUMAN	Oxidation (M)		FALSE
IAELSATAQEIIK	55.9	1385.78	13	2.5	693.9	2	20.7584	500000	6410000	5063	20210526_HS_Frac3-3.raw	6	P04114|APOB_HUMAN			FALSE
IAPQLSTEELVSLGEK	59.46	1712.92	16	3.6	857.473	2	23.0392	3050000	35300000	5886	20210526_HS_Frac3-3.raw	6	P43652|AFAM_HUMAN			FALSE
IAQWQSFQLEGGLK	66.33	1603.84	14	4	802.931	2	23.5058	4550000	47500000	5905	20210526_HS_Frac4-3.raw	17	P01023|A2MG_HUMAN			FALSE
IASFSQNC(+57.02)DIYPGK	71.12	1598.74	14	-0.6	800.38	2	17.9245	4650000	46000000	4053	20210526_HS_Frac3-3.raw	8	P01042|KNG1_HUMAN	Carbamidomethylation	C8:Carbamidomethylation:1000.00	FALSE
IAYGTQGSSGYSLR	42.83	1458.71	14	-0.6	730.364	2	15.4015	98200	1040000	3224	20210526_HS_Frac3-1.raw	3	H0YAC1|H0YAC1_HUMAN;E9PBC5|E9PBC5_HUMAN;P03952|KLKB1_HUMAN			FALSE
IDDIWNLEVK	52.11	1243.64	10	3.7	622.834	2	23.1475	2380000	23500000	5922	20210526_HS_Frac3-3.raw	5	P04114|APOB_HUMAN			FALSE
IDSLLENDR	45.86	1073.54	9	1.3	537.778	2	11.2317	1790000	3720000	2393	20210526_HS_Frac2-3.raw	5	H0YLK8|H0YLK8_HUMAN;P10909|CLUS_HUMAN;H0YC35|H0YC35_HUMAN;E7ETB4|E7ETB4_HUMAN;E7ERK6|E7ERK6_HUMAN			FALSE
IDTQDIEASHYR	41.03	1446.67	12	0.1	483.234	3	13.2282	524000	1590000	2917	20210526_HS_Frac2-3.raw	2	P01031|CO5_HUMAN			FALSE
IDVHLVPDR	54.19	1062.58	9	3.1	532.3	2	17.0206	716000	4370000	3202	20210526_HS_Frac1-3.raw	3	P08603|CFAH_HUMAN			FALSE
IEC(+57.02)VSAE(+21.98)TTEDC(+57.02)IAK	41.49	1746.74	15	3.2	874.384	2	15.3974	198000	2060000	3238	20210526_HS_Frac3-3.raw	1	P02787|TRFE_HUMAN	Carbamidomethylation; Sodium adduct; Carbamidomethylation	C3:Carbamidomethylation:1000.00;E7:Sodium adduct:0.00;C12:Carbamidomethylation:1000.00	FALSE
IEC(+57.02)VSAETTE(+21.98)DC(+57.02)IAK	50.42	1746.74	15	0.6	874.382	2	15.3553	1140000	8510000	3241	20210526_HS_Frac3-2.raw	2	P02787|TRFE_HUMAN	Carbamidomethylation; Sodium adduct; Carbamidomethylation	C3:Carbamidomethylation:1000.00;E10:Sodium adduct:11.06;C12:Carbamidomethylation:1000.00	FALSE
IEC(+57.02)VSAETTEDC(+57.02)IAK	65.95	1724.76	15	2	863.392	2	15.9393	23600000	135000000	3404	20210526_HS_Frac3-3.raw	22	P02787|TRFE_HUMAN	Carbamidomethylation; Carbamidomethylation	C3:Carbamidomethylation:1000.00;C12:Carbamidomethylation:1000.00	FALSE
IEDGFSLK	33.87	907.465	8	1.4	454.742	2	16.2964	7120000	30200000	3830	20210526_HS_Frac2-3.raw	6	P01008|ANT3_HUMAN			FALSE
IEGNLIFDPNNYLPK	60.77	1745.9	15	3.5	873.963	2	26.0849	2330000	18100000	6821	20210526_HS_Frac3-3.raw	7	A8MUN2|A8MUN2_HUMAN;P04114|APOB_HUMAN			FALSE
IEIPLPFGGK	47.36	1069.62	10	3.8	535.82	2	24.7442	8130000	50300000	6440	20210526_HS_Frac3-3.raw	10	P04114|APOB_HUMAN			FALSE
IFFYDSENPPASEVLR	54.43	1882.91	16	1	942.467	2	23.9981	2610000	20500000	6093	20210526_HS_Frac4-1.raw	4	P27169|PON1_HUMAN			FALSE
IGESIELTC(+57.02)PK	56.39	1245.63	11	-0.3	623.823	2	17.3061	233000	2390000	3835	20210526_HS_Frac3-3.raw	3	P13671|CO6_HUMAN	Carbamidomethylation	C9:Carbamidomethylation:1000.00	FALSE
IGQDGISTSATTNLK	61.29	1504.77	15	-0.4	753.396	2	15.1998	5530000	34200000	3157	20210526_HS_Frac3-3.raw	6	P04114|APOB_HUMAN			FALSE
IHSGSFQSQVELSNDQEK	61.96	2031.95	18	2.1	678.328	3	15.2872	1340000	11200000	3515	20210526_HS_Frac2-2.raw	3	P04114|APOB_HUMAN			FALSE
IITHPN(+0.98)FNGNTLDN(+0.98)DIM(+15.99)LIK	43.84	2300.14	20	-1.1	767.721	3	23.5879	436000	4040000	6562	20210526_HS_Frac2-1.raw	1	#CONTAM#cont|000144|;#CONTAM#cont|000142|;#CONTAM#cont|000023|;#CONTAM#cont|000143|;#CONTAM#cont|000141|;#CONTAM#cont|000040|;#CONTAM#cont|000032|	Deamidation (NQ); Deamidation (NQ); Oxidation (M)	N6:Deamidation (NQ):5.99;N14:Deamidation (NQ):82.63;M17:Oxidation (M):1000.00	FALSE
IITHPNFN(+0.98)GNTLDN(+0.98)DIM(+15.99)LIK	53.81	2300.14	20	0.2	767.722	3	23.5684	410000	4270000	6564	20210526_HS_Frac2-2.raw	2	#CONTAM#cont|000144|;#CONTAM#cont|000142|;#CONTAM#cont|000023|;#CONTAM#cont|000143|;#CONTAM#cont|000141|;#CONTAM#cont|000040|;#CONTAM#cont|000032|	Deamidation (NQ); Deamidation (NQ); Oxidation (M)	N8:Deamidation (NQ):20.41;N14:Deamidation (NQ):58.99;M17:Oxidation (M):1000.00	FALSE
IITHPNFN(+0.98)GNTLDNDIM(+15.99)LIK	55.12	2299.15	20	3	767.396	3	24.3403	7000000	47800000	6310	20210526_HS_Frac3-2.raw	10	#CONTAM#cont|000144|;#CONTAM#cont|000142|;#CONTAM#cont|000023|;#CONTAM#cont|000143|;#CONTAM#cont|000141|;#CONTAM#cont|000040|;#CONTAM#cont|000032|	Deamidation (NQ); Oxidation (M)	N8:Deamidation (NQ):7.32;M17:Oxidation (M):1000.00	FALSE
IITHPNFNGNTLDN(+0.98)DIM(+15.99)LIK	60.25	2299.15	20	2.5	767.396	3	23.3485	299000	4030000	6481	20210526_HS_Frac2-3.raw	3	#CONTAM#cont|000144|;#CONTAM#cont|000142|;#CONTAM#cont|000023|;#CONTAM#cont|000143|;#CONTAM#cont|000141|;#CONTAM#cont|000040|;#CONTAM#cont|000032|	Deamidation (NQ); Oxidation (M)	N14:Deamidation (NQ):49.79;M17:Oxidation (M):1000.00	FALSE
IITHPNFNGNTLDNDIM(+15.99)LIK	68.07	2298.17	20	4.4	767.07	3	24.0224	3150000	33900000	6709	20210526_HS_Frac2-3.raw	3	#CONTAM#cont|000144|;#CONTAM#cont|000142|;#CONTAM#cont|000023|;#CONTAM#cont|000143|;#CONTAM#cont|000141|;#CONTAM#cont|000040|;#CONTAM#cont|000032|	Oxidation (M)		FALSE
ILDDLSPR	36.07	927.503	8	2	464.761	2	12.9742	5380000	11600000	2853	20210526_HS_Frac2-2.raw	3	Q14624|ITIH4_HUMAN;B7ZKJ8|B7ZKJ8_HUMAN;H7C0L5|H7C0L5_HUMAN			FALSE
ILGGHLDAK	46.41	922.524	9	-1.2	462.269	2	6.6902	6930000	17900000	1240	20210526_HS_Frac1-2.raw	8	P00738|HPT_HUMAN;A0A0A0MRD9|A0A0A0MRD9_HUMAN;A0A087WU08|A0A087WU08_HUMAN;H0Y300|H0Y300_HUMAN;A0A0C4DGL8|A0A0C4DGL8_HUMAN;J3QR68|J3QR68_HUMAN;P00739|HPTR_HUMAN			FALSE
ILLQ(+0.98)GTPVAQM(+15.99)TEDAVDAER	43.05	2173.06	20	8	725.368	3	23.0475	104000	511000	5764	20210526_HS_Frac4-3.raw	1	P01024|CO3_HUMAN	Deamidation (NQ); Oxidation (M)	Q4:Deamidation (NQ):9.45;M11:Oxidation (M):1000.00	FALSE
ILLQGTPVAQ(+0.98)M(+15.99)TEDAVDAER	41.82	2173.06	20	7	725.367	3	20.9223	93500	1350000	5127	20210526_HS_Frac3-2.raw	1	P01024|CO3_HUMAN	Deamidation (NQ); Oxidation (M)	Q10:Deamidation (NQ):0.00;M11:Oxidation (M):1000.00	FALSE
ILLQGTPVAQM(+15.99)TE(+21.98)DAVDAER	58.9	2194.06	20	2.4	732.363	3	20.9726	8710000	90900000	4952	20210526_HS_Frac4-1.raw	8	P01024|CO3_HUMAN	Oxidation (M); Sodium adduct	M11:Oxidation (M):1000.00;E13:Sodium adduct:14.02	FALSE
ILLQGTPVAQM(+15.99)TEDAVDAER	71.84	2172.07	20	-2.1	725.03	3	21.0392	36000000	474000000	3602	20210526_HS_Frac5-3.raw	37	P01024|CO3_HUMAN	Oxidation (M)		FALSE
IM(+15.99)N(+0.98)GEADAM(+15.99)SLDGGFVYIAGK	57.2	2190.98	21	2.5	1096.5	2	21.6209	1530000	10300000	5200	20210526_HS_Frac4-1.raw	18	P02787|TRFE_HUMAN	Oxidation (M); Deamidation (NQ); Oxidation (M)		FALSE
IM(+15.99)NGEADAM(+15.99)SLDGGFVYIAGK	68.64	2190	21	1.6	731.01	3	22.4301	2000000	27300000	5501	20210526_HS_Frac4-1.raw	13	P02787|TRFE_HUMAN	Oxidation (M); Oxidation (M)		FALSE
IN(+0.98)NQLTLDSNTK	58.69	1360.68	12	-0.4	681.351	2	12.1131	1290000	1930000	2444	20210526_HS_Frac3-3.raw	2	P04114|APOB_HUMAN	Deamidation (NQ)	N2:Deamidation (NQ):14.02	FALSE
INNQLTLDSNTK	40.57	1359.7	12	4	680.862	2	11.0933	375000	665000	2284	20210526_HS_Frac3-3.raw	2	P04114|APOB_HUMAN			FALSE
IPGIFELGISSQSDR	45.5	1617.84	15	4.7	809.932	2	24.7286	179000	2140000	6442	20210526_HS_Frac3-1.raw	2	F5GY80|F5GY80_HUMAN;P07358|CO8B_HUMAN;F5H7G1|F5H7G1_HUMAN			FALSE
IPIE(+21.98)DGSGEVVLSR	47.44	1491.75	14	1.6	746.888	2	18.7205	332000	7440000	4329	20210526_HS_Frac3-3.raw	3	P01024|CO3_HUMAN	Sodium adduct	E4:Sodium adduct:40.00	FALSE
IPIED(+21.98)GSGEVVLSR	39.85	1491.75	14	0.2	498.261	3	18.4317	30900	339000	4239	20210526_HS_Frac3-3.raw	1	P01024|CO3_HUMAN	Sodium adduct	D5:Sodium adduct:17.01	FALSE
IPIEDGSGE(+21.98)VVLSR	51.46	1491.75	14	-0.1	498.26	3	18.7229	721000	7430000	4304	20210526_HS_Frac3-2.raw	1	P01024|CO3_HUMAN	Sodium adduct	E9:Sodium adduct:11.12	FALSE
IPIEDGSGEVVLSR	70.04	1469.77	14	-3.1	735.894	2	18.4317	15000000	114000000	4216	20210526_HS_Frac3-3.raw	39	P01024|CO3_HUMAN			FALSE
IPLDLVPK	37.63	893.559	8	-0.6	447.788	2	19.9494	2270000	20600000	5185	20210526_HS_Frac2-3.raw	3	P01031|CO5_HUMAN			FALSE
IPSVQINFK	54.87	1044.6	9	4.5	523.31	2	20.3876	6840000	59800000	5360	20210526_HS_Frac2-3.raw	7	P04114|APOB_HUMAN			FALSE
IPTTFEN(+0.98)GR	45.51	1034.5	9	1.4	518.261	2	8.143	2270000	6360000	1733	20210526_HS_Frac3-3.raw	6	C9JX71|C9JX71_HUMAN;P05090|APOD_HUMAN;C9JF17|C9JF17_HUMAN	Deamidation (NQ)		FALSE
IQNILTEEPK	52.49	1183.64	10	2.1	592.833	2	16.2413	7930000	49300000	3798	20210526_HS_Frac2-2.raw	7	P27169|PON1_HUMAN			FALSE
IQPSGGTNIN(+0.98)EALLR	45.55	1582.83	15	0.4	792.426	2	18.956	162000	2390000	4378	20210526_HS_Frac3-1.raw	3	#CONTAM#cont|000108|;Q5T985|Q5T985_HUMAN;P19823|ITIH2_HUMAN	Deamidation (NQ)	N10:Deamidation (NQ):18.53	FALSE
IQPSGGTNINEALLR	65.98	1581.85	15	-2.1	791.932	2	19.2619	8440000	135000000	4496	20210526_HS_Frac3-3.raw	10	#CONTAM#cont|000108|;Q5T985|Q5T985_HUMAN;P19823|ITIH2_HUMAN			FALSE
ISLPESLK	41.69	885.517	8	0.2	443.767	2	18.1891	28100000	207000000	4130	20210526_HS_Frac3-2.raw	18	P01024|CO3_HUMAN			FALSE
ITEN(+0.98)DIQIALDDAK	58.29	1558.77	14	4.7	780.4	2	20.1628	323000	4240000	4849	20210526_HS_Frac3-3.raw	4	P04114|APOB_HUMAN	Deamidation (NQ)	N4:Deamidation (NQ):38.16	FALSE
ITENDIQIALDDAK	58.97	1557.79	14	2.5	779.906	2	21.2827	2310000	48800000	5240	20210526_HS_Frac3-3.raw	3	P04114|APOB_HUMAN			FALSE
ITHYNYLILSK	53.93	1363.75	11	1.9	455.591	3	19.9627	165000	1830000	3952	20210526_HS_Frac1-3.raw	3	P01031|CO5_HUMAN			FALSE
ITLLSALVETR	56.18	1214.72	11	1.5	608.372	2	25.179	9450000	81300000	6553	20210526_HS_Frac3-3.raw	10	G3V3A0|G3V3A0_HUMAN;P01011|AACT_HUMAN			FALSE
ITLPDFR	39.57	860.476	7	0	431.247	2	20.2698	1580000	28300000	5320	20210526_HS_Frac2-3.raw	5	P04114|APOB_HUMAN			FALSE
ITLPDFTGDLR	40.75	1246.66	11	4.4	624.34	2	23.9297	403000	3930000	6182	20210526_HS_Frac3-1.raw	3	P18428|LBP_HUMAN			FALSE
ITPNLAEFAFSLYR	48.18	1640.86	14	4.7	821.442	2	29.3165	72600	758000	7687	20210526_HS_Frac3-1.raw	1				FALSE
ITQVLHFTK	46.16	1085.62	9	3.2	543.821	2	16.3721	640000	4590000	3016	20210526_HS_Frac1-1.raw	3				FALSE
IVIEYVDR	34.87	1005.55	8	-0.2	503.784	2	16.8543	1080000	6410000	4081	20210526_HS_Frac2-2.raw	3	G3XAM2|G3XAM2_HUMAN;A0A2R8Y3M9|A0A2R8Y3M9_HUMAN;E7ETH0|E7ETH0_HUMAN;P05156|CFAI_HUMAN			FALSE
IVLGQEQDSYGGK	61.6	1392.69	13	1.1	697.355	2	11.7265	3940000	8970000	2495	20210526_HS_Frac3-3.raw	15	P02743|SAMP_HUMAN			FALSE
IVQILPWEQNEQVK	52.27	1722.93	14	4.2	862.479	2	23.5795	3160000	27500000	6084	20210526_HS_Frac3-2.raw	4	A8MUN2|A8MUN2_HUMAN;P04114|APOB_HUMAN			FALSE
IVSSAM(+15.99)EPDREYHFGQAVR	62.95	2207.04	19	4.3	552.77	4	17.0288	901000	9110000	3183	20210526_HS_Frac1-1.raw	2	A0A0D9SG88|A0A0D9SG88_HUMAN;P08603|CFAH_HUMAN	Oxidation (M)		FALSE
IWDVVEK	40.83	887.475	7	-1.9	444.746	2	15.6199	11400000	98700000	3576	20210526_HS_Frac2-3.raw	8	P01024|CO3_HUMAN			FALSE
IYLQPGR	39.22	845.476	7	-3.8	423.745	2	7.0581	151000	482000	1502	20210526_HS_Frac2-2.raw	2	Q5T985|Q5T985_HUMAN;Q5T987|Q5T987_HUMAN;P19823|ITIH2_HUMAN			FALSE
IYSGILNLSDITK	42.88	1435.79	13	-3.3	718.903	2	24.5824	108000	1730000	6417	20210526_HS_Frac3-1.raw	3	H0YAC1|H0YAC1_HUMAN;E9PBC5|E9PBC5_HUMAN;P03952|KLKB1_HUMAN			FALSE
KAADDTWEPFASGK	64.6	1521.71	14	0.2	508.246	3	17.5948	5750000	38300000	4285	20210526_HS_Frac2-3.raw	9	P02766|TTHY_HUMAN;A0A087WT59|A0A087WT59_HUMAN			FALSE
KADGSYAAWLSR	62.81	1323.66	12	3.9	442.228	3	18.4259	202000	1380000	3602	20210526_HS_Frac1-2.raw	2				FALSE
KC(+57.02)STSSLLEAC(+57.02)TFR	53.62	1658.78	14	1.9	553.936	3	18.6759	1220000	18700000	4673	20210526_HS_Frac2-2.raw	6	P02787|TRFE_HUMAN	Carbamidomethylation; Carbamidomethylation	C2:Carbamidomethylation:1000.00;C11:Carbamidomethylation:1000.00	FALSE
KC(+57.02)SYTEDAQC(+57.02)IDGTIEVPK	61.05	2213	19	1.1	738.677	3	19.0503	284000	3010000	4802	20210526_HS_Frac2-1.raw	1	P02749|APOH_HUMAN	Carbamidomethylation; Carbamidomethylation	C2:Carbamidomethylation:1000.00;C10:Carbamidomethylation:1000.00	FALSE
KDTVIKPLLVEPEGLEK	61.73	1907.1	17	4.5	477.784	4	21.7359	1350000	14200000	4409	20210526_HS_Frac1-2.raw	6	P01023|A2MG_HUMAN			FALSE
KEAGIPEFYDYDVALIK	41.66	1970	17	-6.8	657.674	3	25.5476			7217	20210526_HS_Frac2-3.raw	1	H7C5H1|H7C5H1_HUMAN;E7ETN3|E7ETN3_HUMAN;P00751|CFAB_HUMAN;A0A0G2JH38|A0A0G2JH38_HUMAN;B4E1Z4|B4E1Z4_HUMAN			FALSE
KFPSGTFEQVSQLVK	62.73	1693.9	15	4.1	847.966	2	22.8122	10500000	47500000	6286	20210526_HS_Frac2-3.raw	10	D6RBJ7|D6RBJ7_HUMAN;P02774|VTDB_HUMAN;D6RF20|D6RF20_HUMAN;D6RF35|D6RF35_HUMAN			FALSE
KGDTFSC(+57.02)M(+15.99)VGHEALPLAFTQK	74.73	2352.12	21	-0.3	785.051	3	22.3087	1700000	26800000	6058	20210526_HS_Frac2-1.raw	3	P01876|IGHA1_HUMAN;A0A286YEY1|A0A286YEY1_HUMAN	Carbamidomethylation; Oxidation (M)	C7:Carbamidomethylation:1000.00	FALSE
KGEWVALNPLR	60.85	1281.72	11	3.6	428.249	3	21.2824	397000	4060000	4296	20210526_HS_Frac1-2.raw	5	A0A0D9SG88|A0A0D9SG88_HUMAN;P08603|CFAH_HUMAN;Q5TFM2|Q5TFM2_HUMAN			FALSE
KGISTSAASPAVGTVGM(+15.99)DM(+15.99)DEDDDFSK	67.61	2762.19	27	1.9	921.742	3	17.5393	325000	5680000	3910	20210526_HS_Frac3-2.raw	3	P04114|APOB_HUMAN	Oxidation (M); Oxidation (M)		FALSE
KGYTQQLAFR	47.6	1210.65	10	2.2	606.332	2	15.0687	1130000	5020000	2755	20210526_HS_Frac1-2.raw	3	P01024|CO3_HUMAN			FALSE
KLGQSLDC(+57.02)NAEVYVVPWEK	50.22	2234.1	19	0.7	745.712	3	23.6265	171000	2660000	6561	20210526_HS_Frac2-1.raw	3	P01042|KNG1_HUMAN	Carbamidomethylation	C8:Carbamidomethylation:1000.00	FALSE
KLISVDTEHSNIYLQN(+0.98)GPDR	44.4	2299.14	20	0.1	767.391	3	19.3634	33400	782000	4928	20210526_HS_Frac2-1.raw	2	E9PFZ2|E9PFZ2_HUMAN;P00450|CERU_HUMAN	Deamidation (NQ)	N16:Deamidation (NQ):17.01	FALSE
KLSSWVLLM(+15.99)K	46.52	1219.7	10	5.2	610.86	2	21.2436	1360000	10200000	4288	20210526_HS_Frac1-2.raw	3		Oxidation (M)		FALSE
KLTISEQNIQR	57.02	1328.74	11	2.4	443.922	3	13.7115	430000	1810000	2461	20210526_HS_Frac1-3.raw	2	A8MUN2|A8MUN2_HUMAN;P04114|APOB_HUMAN			FALSE
KLVAASQAALGL	57.41	1140.69	12	-6.9	571.349	2	19.5306	59700000	668000000	5001	20210526_HS_Frac2-2.raw	26	A0A087WWT3|A0A087WWT3_HUMAN;P02768|ALBU_HUMAN;C9JKR2|C9JKR2_HUMAN;D6RHD5|D6RHD5_HUMAN;B7WNR0|B7WNR0_HUMAN;H0YA55|H0YA55_HUMAN			FALSE
KM(+15.99)TSNFPVDLSDYPK	45.95	1756.83	15	3.7	586.623	3	20.3314	700000	7310000	5323	20210526_HS_Frac2-2.raw	3	P04114|APOB_HUMAN	Oxidation (M)		FALSE
KPVEEYANC(+57.02)HLAR	58.99	1585.77	13	0.1	529.599	3	7.2029	3940000	20800000	1490	20210526_HS_Frac2-3.raw	8	P02787|TRFE_HUMAN	Carbamidomethylation	C9:Carbamidomethylation:1000.00	FALSE
KQISNLQQSISDAEQR	49.01	1843.94	16	3.2	615.658	3	16.183	141000	1860000	3787	20210526_HS_Frac2-3.raw	2	#CONTAM#cont|000132|;#CONTAM#cont|000135|;#CONTAM#cont|000134|;P04264|K2C1_HUMAN			FALSE
KQTALVELVK	47.91	1127.69	10	3.9	564.855	2	21.6401	132000000	1320000000	3569	20210526_HS_Frac1-2.raw	52	A0A0C4DGB6|A0A0C4DGB6_HUMAN;A0A087WWT3|A0A087WWT3_HUMAN;P02768|ALBU_HUMAN;C9JKR2|C9JKR2_HUMAN;D6RHD5|D6RHD5_HUMAN;B7WNR0|B7WNR0_HUMAN;H0YA55|H0YA55_HUMAN			FALSE
KSASDLTWDNLK	57.59	1376.69	12	3.4	459.907	3	17.9315	2790000	23700000	3445	20210526_HS_Frac1-3.raw	10	H7C5E8|H7C5E8_HUMAN;P02787|TRFE_HUMAN			FALSE
KSDVGFLPPFPTLDPEEK	46.9	2015.03	18	-0.7	672.684	3	26.4227	249000	3390000	7485	20210526_HS_Frac2-2.raw	2	P43652|AFAM_HUMAN			FALSE
KSPQELLC(+57.02)GASLISDR	41.98	1772.91	16	-1	887.464	2	21.3018	25500	652000	5681	20210526_HS_Frac2-1.raw	1	P00734|THRB_HUMAN;E9PIT3|E9PIT3_HUMAN	Carbamidomethylation	C8:Carbamidomethylation:1000.00	FALSE
KTLLSNLEEAK	52.87	1244.7	11	1.3	415.907	3	17.4783	277000	3150000	3335	20210526_HS_Frac1-3.raw	6	E5RGB0|E5RGB0_HUMAN;H0YLK8|H0YLK8_HUMAN;P10909|CLUS_HUMAN;E5RH61|E5RH61_HUMAN;E7ETB4|E7ETB4_HUMAN;E5RG36|E5RG36_HUMAN;E5RJZ5|E5RJZ5_HUMAN;E7ERK6|E7ERK6_HUMAN			FALSE
KVPQ(+0.98)VSTPTLVEVSR	46.82	1639.91	15	9.4	547.652	3	19.3205	226000000	1880000000	5120	20210526_HS_Frac2-1.raw	6	A0A0C4DGB6|A0A0C4DGB6_HUMAN;#CONTAM#cont|000097|;#CONTAM#cont|000035|;A0A087WWT3|A0A087WWT3_HUMAN;P02768|ALBU_HUMAN;#CONTAM#cont|000017|;C9JKR2|C9JKR2_HUMAN;D6RHD5|D6RHD5_HUMAN;B7WNR0|B7WNR0_HUMAN;H0YA55|H0YA55_HUMAN	Deamidation (NQ)		FALSE
KVPQVSTPTLVE(+21.98)VSR	40.49	1660.91	15	-0.3	554.647	3	19.2251	68200000	283000000	4922	20210526_HS_Frac2-3.raw	14	A0A0C4DGB6|A0A0C4DGB6_HUMAN;#CONTAM#cont|000097|;#CONTAM#cont|000035|;A0A087WWT3|A0A087WWT3_HUMAN;P02768|ALBU_HUMAN;#CONTAM#cont|000017|;C9JKR2|C9JKR2_HUMAN;D6RHD5|D6RHD5_HUMAN;B7WNR0|B7WNR0_HUMAN;H0YA55|H0YA55_HUMAN	Sodium adduct	E12:Sodium adduct:26.52	FALSE
KVPQVSTPTLVEVSR	73.99	1638.93	15	-4.2	820.472	2	19.2686	989000000	11700000000	4924	20210526_HS_Frac2-2.raw	375	A0A0C4DGB6|A0A0C4DGB6_HUMAN;#CONTAM#cont|000097|;#CONTAM#cont|000035|;A0A087WWT3|A0A087WWT3_HUMAN;P02768|ALBU_HUMAN;#CONTAM#cont|000017|;C9JKR2|C9JKR2_HUMAN;D6RHD5|D6RHD5_HUMAN;B7WNR0|B7WNR0_HUMAN;H0YA55|H0YA55_HUMAN			FALSE
KVPQVSTPTLVEVSRN(+0.98)LGK	63.27	2052.16	19	1.4	685.063	3	20.7962	271000	5070000	5480	20210526_HS_Frac2-1.raw	2	A0A0C4DGB6|A0A0C4DGB6_HUMAN;A0A087WWT3|A0A087WWT3_HUMAN;P02768|ALBU_HUMAN;C9JKR2|C9JKR2_HUMAN;D6RHD5|D6RHD5_HUMAN;B7WNR0|B7WNR0_HUMAN;H0YA55|H0YA55_HUMAN	Deamidation (NQ)	N16:Deamidation (NQ):71.31	FALSE
KVPQVSTPTLVEVSRNLGK	39.4	2051.17	19	2.2	684.733	3	20.9462	157000	1920000	4224	20210526_HS_Frac1-2.raw	2	A0A0C4DGB6|A0A0C4DGB6_HUMAN;A0A087WWT3|A0A087WWT3_HUMAN;P02768|ALBU_HUMAN;C9JKR2|C9JKR2_HUMAN;D6RHD5|D6RHD5_HUMAN;B7WNR0|B7WNR0_HUMAN;H0YA55|H0YA55_HUMAN			FALSE
KYLYEIAR	52.16	1054.58	8	2	528.299	2	15.5319	59300000	381000000	2956	20210526_HS_Frac1-3.raw	48	A0A0C4DGB6|A0A0C4DGB6_HUMAN;P02768|ALBU_HUMAN;H7C013|H7C013_HUMAN			FALSE
KYTYNYEAESSSGVPGTADSR	59.57	2281.01	21	-2.9	761.345	3	15.2646	1570000	17200000	3479	20210526_HS_Frac2-1.raw	3	A8MUN2|A8MUN2_HUMAN;A0A669KB70|A0A669KB70_HUMAN;P04114|APOB_HUMAN			FALSE
KYVLPNFEVK	45.54	1235.69	10	6.3	618.857	2	20.7892	383000	4290000	4144	20210526_HS_Frac1-3.raw	3				FALSE
LAAC(+57.02)LEGNC(+57.02)AEGLGTNYR	84.77	1967.88	18	2.9	984.955	2	18.7229	357000	5790000	4323	20210526_HS_Frac3-2.raw	3	C9JV37|C9JV37_HUMAN;P00734|THRB_HUMAN;E9PIT3|E9PIT3_HUMAN	Carbamidomethylation; Carbamidomethylation	C4:Carbamidomethylation:1000.00;C9:Carbamidomethylation:1000.00	FALSE
LAEGFPLPLLK	43.28	1196.72	11	0.7	599.369	2	26.6286	467000	5190000	7550	20210526_HS_Frac2-3.raw	6	P18428|LBP_HUMAN			FALSE
LAELPADALGPLQR	55.12	1462.81	14	4.1	732.42	2	22.4627	500000	7370000	5689	20210526_HS_Frac3-2.raw	4	P35858|ALS_HUMAN			FALSE
LAKTYETTLEK	38.93	1295.7	11	0.8	432.907	3	7.5381	1230000	3950000	1383	20210526_HS_Frac1-2.raw	4	A0A0C4DGB6|A0A0C4DGB6_HUMAN;P02768|ALBU_HUMAN;C9JKR2|C9JKR2_HUMAN;D6RHD5|D6RHD5_HUMAN;B7WNR0|B7WNR0_HUMAN;H0YA55|H0YA55_HUMAN			FALSE
LALDN(+0.98)GGLAR	44.09	999.535	10	0.4	500.777	2	14.6048	1530000	5420000	3028	20210526_HS_Frac3-3.raw	4	Q14624|ITIH4_HUMAN;B7ZKJ8|B7ZKJ8_HUMAN;H7C0L5|H7C0L5_HUMAN	Deamidation (NQ)		FALSE
LALWGEHTGQLYSK	50.81	1601.82	14	2.9	534.951	3	20.7759	1090000	10300000	5486	20210526_HS_Frac2-2.raw	3	P04114|APOB_HUMAN			FALSE
LATALSLSNK	44.77	1016.59	10	0.2	509.303	2	14.5555	2540000	17000000	3285	20210526_HS_Frac2-2.raw	3	P04114|APOB_HUMAN			FALSE
LC(+57.02)M(+15.99)GSGLN(+0.98)LC(+57.02)EPNNK	45.35	1722.74	15	0.9	862.379	2	16.2959	3340000	19700000	3552	20210526_HS_Frac3-1.raw	2	H7C5E8|H7C5E8_HUMAN;P02787|TRFE_HUMAN	Carbamidomethylation; Oxidation (M); Deamidation (NQ); Carbamidomethylation	C2:Carbamidomethylation:1000.00;M3:Oxidation (M):1000.00;N8:Deamidation (NQ):56.99;C10:Carbamidomethylation:1000.00	FALSE
LC(+57.02)M(+15.99)GSGLNLC(+57.02)EPNNK	71.12	1721.75	15	-1.8	861.885	2	16.119	18100000	103000000	3452	20210526_HS_Frac3-3.raw	7	H7C5E8|H7C5E8_HUMAN;P02787|TRFE_HUMAN	Carbamidomethylation; Oxidation (M); Carbamidomethylation	C2:Carbamidomethylation:1000.00;C10:Carbamidomethylation:1000.00	FALSE
LC(+57.02)TVATLR	57.21	932.511	8	-1.3	467.264	2	11.9201	723000000	2250000000	2571	20210526_HS_Frac3-3.raw	155	A0A0C4DGB6|A0A0C4DGB6_HUMAN;A0A087WWT3|A0A087WWT3_HUMAN;P02768|ALBU_HUMAN;H7C013|H7C013_HUMAN	Carbamidomethylation	C2:Carbamidomethylation:1000.00	FALSE
LDAQASFLPK	49.35	1088.59	10	4.2	545.305	2	18.4038	4340000	28400000	4209	20210526_HS_Frac3-3.raw	4	P19827|ITIH1_HUMAN			FALSE
LDELRDEGK	47.81	1073.54	9	6.1	537.778	2	8.4409	97400000	305000000	1972	20210526_HS_Frac1-1.raw	71	A0A0C4DGB6|A0A0C4DGB6_HUMAN;P02768|ALBU_HUMAN;D6RHD5|D6RHD5_HUMAN;B7WNR0|B7WNR0_HUMAN;H0YA55|H0YA55_HUMAN			FALSE
LDTLAQEVALLK	50.44	1312.76	12	1.7	657.391	2	24.0369	1160000	12500000	6731	20210526_HS_Frac2-3.raw	5	P05452|TETN_HUMAN;E9PHK0|E9PHK0_HUMAN			FALSE
LDVTTSIGR	42.71	960.524	9	2.1	481.272	2	12.4462	2230000	9600000	2741	20210526_HS_Frac2-1.raw	3	P04114|APOB_HUMAN			FALSE
LEALPNSLLAPLGR	45.13	1462.85	14	-2.8	732.433	2	25.6749	237000	3260000	6698	20210526_HS_Frac3-3.raw	3	P35858|ALS_HUMAN			FALSE
LEDM(+15.99)EQALSPSVFK	65.46	1608.77	14	1.4	805.396	2	19.7086	10000000	110000000	4680	20210526_HS_Frac3-3.raw	8	P05155|IC1_HUMAN;E9PGN7|E9PGN7_HUMAN	Oxidation (M)		FALSE
LEIQSQVDSQHVGHSVLTAK	59.67	2175.13	20	4	544.794	4	18.0028	1460000	22600000	4431	20210526_HS_Frac2-2.raw	9	P04114|APOB_HUMAN			FALSE
LELHVDGPPPRPQLR	47.52	1722.95	15	1	431.746	4	19.5316	586000	2720000	3790	20210526_HS_Frac1-1.raw	3	P04217|A1BG_HUMAN			FALSE
LELLSLSK	36.68	901.548	8	-3.1	451.782	2	20.0546	926000	6100000	5309	20210526_HS_Frac2-1.raw	2	P22792|CPN2_HUMAN			FALSE
LELSVDGAK	37.73	930.502	9	-0.7	466.26	2	13.7522	3440000	10400000	3029	20210526_HS_Frac2-3.raw	3				FALSE
LENEIQTYR	48.13	1164.58	9	1.4	583.299	2	8.1702	2860000	7510000	1808	20210526_HS_Frac2-3.raw	3	#CONTAM#cont|000133|;#CONTAM#cont|000131|;P13645|K1C10_HUMAN;#CONTAM#cont|000129|;#CONTAM#cont|000136|;#CONTAM#cont|000122|;#CONTAM#cont|000130|			FALSE
LEQGENVFLQATDK	56.53	1590.79	14	1.1	796.405	2	19.086	1410000	14600000	4453	20210526_HS_Frac3-2.raw	1	A0A0A0MSV6|A0A0A0MSV6_HUMAN;P02746|C1QB_HUMAN;D6R934|D6R934_HUMAN			FALSE
LESEETM(+15.99)VLEAHDAQGDVPVTVTVHDFPGK	68.39	3265.54	30	2.8	1089.53	3	22.5291	9630000	87800000	6178	20210526_HS_Frac2-3.raw	11	P01024|CO3_HUMAN	Oxidation (M)		FALSE
LFLEPTR	35.22	874.491	7	-1.3	438.254	2	15.5934	3090000	8180000	3591	20210526_HS_Frac2-1.raw	3	P00747|PLMN_HUMAN			FALSE
LFTFHADIC(+57.02)TLPDTEK	41.32	1906.91	16	3	636.647	3	23.6838	105000	957000	4765	20210526_HS_Frac1-1.raw	1	#CONTAM#cont|000097|;#CONTAM#cont|000035|;#CONTAM#cont|000017|	Carbamidomethylation	C9:Carbamidomethylation:1000.00	FALSE
LGEHNIDVLEGN(+0.98)EQFINAAK	62.91	2211.08	20	4.4	738.041	3	22.3313			6113	20210526_HS_Frac2-3.raw	1	#CONTAM#cont|000144|;#CONTAM#cont|000142|;#CONTAM#cont|000023|;#CONTAM#cont|000143|;#CONTAM#cont|000141|;#CONTAM#cont|000040|;#CONTAM#cont|000032|	Deamidation (NQ)	N12:Deamidation (NQ):11.22	FALSE
LGEHNIDVLEGNEQFIN(+0.98)AAK	72.18	2211.08	20	3.9	738.04	3	21.6736	2100000	21600000	5855	20210526_HS_Frac2-3.raw	4	#CONTAM#cont|000144|;#CONTAM#cont|000142|;#CONTAM#cont|000023|;#CONTAM#cont|000143|;#CONTAM#cont|000141|;#CONTAM#cont|000040|;#CONTAM#cont|000032|	Deamidation (NQ)	N17:Deamidation (NQ):26.52	FALSE
LGEHNIDVLEGNEQFINAAK	82.32	2210.1	20	-4.2	737.706	3	22.1146	21300000	279000000	5397	20210526_HS_Frac4-3.raw	31	#CONTAM#cont|000144|;#CONTAM#cont|000142|;#CONTAM#cont|000023|;#CONTAM#cont|000143|;#CONTAM#cont|000141|;#CONTAM#cont|000040|;#CONTAM#cont|000032|			FALSE
LGEVNTYAGDLQK	56.35	1406.7	13	-2.7	704.36	2	16.443	1020000	11500000	3551	20210526_HS_Frac3-3.raw	3	P06727|APOA4_HUMAN			FALSE
LGEYGFQNALIVR	61.7	1478.79	13	5.2	740.405	2	23.2815	333000	2610000	4196	20210526_HS_Frac5-1.raw	3	#CONTAM#cont|000097|;#CONTAM#cont|000035|;#CONTAM#cont|000017|			FALSE
LGFTDLFSK	49.77	1026.54	9	2.1	514.279	2	23.829	1730000	16300000	6609	20210526_HS_Frac2-1.raw	6	P29622|KAIN_HUMAN			FALSE
LGM(+15.99)FNIQHC(+57.02)K	39.71	1262.59	10	1.3	632.306	2	13.2572	472000	928000	2913	20210526_HS_Frac2-3.raw	2		Oxidation (M); Carbamidomethylation	C9:Carbamidomethylation:1000.00	FALSE
LGSLGAAC(+57.02)EQTQTEGAK	36.36	1719.81	17	2.6	860.917	2	7.9989	350000	2210000	1706	20210526_HS_Frac3-3.raw	3	P07357|CO8A_HUMAN	Carbamidomethylation	C8:Carbamidomethylation:1000.00	FALSE
LGVYELLLK	50.45	1046.64	9	1.8	524.329	2	24.7073	9040000	70700000	6932	20210526_HS_Frac2-3.raw	10	Q14624|ITIH4_HUMAN;B7ZKJ8|B7ZKJ8_HUMAN;H7C0L5|H7C0L5_HUMAN			FALSE
LGYVTADGETSGSITC(+57.02)GK	59.26	1814.84	18	1.7	908.43	2	16.4434	2060000	15500000	3546	20210526_HS_Frac3-2.raw	3	P08603|CFAH_HUMAN	Carbamidomethylation	C16:Carbamidomethylation:1000.00	FALSE
LHTEAQIQEEGTVVELTGR	72.27	2109.07	19	1.8	704.034	3	19.7469	6040000	58400000	5084	20210526_HS_Frac2-1.raw	10	P01023|A2MG_HUMAN			FALSE
LIC(+57.02)QATGFSPR	59.99	1248.63	11	-0.1	625.324	2	15.7312	18100000	140000000	3612	20210526_HS_Frac2-3.raw	10	P01871|IGHM_HUMAN	Carbamidomethylation	C3:Carbamidomethylation:1000.00	FALSE
LIDQYGTHYLQSGSLGGEYR	63.92	2256.08	20	2.9	753.039	3	20.595	287000	4760000	5436	20210526_HS_Frac2-2.raw	3	P10643|CO7_HUMAN			FALSE
LIDVISM(+15.99)YR	43.72	1124.59	9	4.3	563.307	2	19.6776	16800000	75600000	5074	20210526_HS_Frac2-3.raw	5	P04114|APOB_HUMAN	Oxidation (M)		FALSE
LISVDTEHSN(+0.98)IYLQNGPDR	36.59	2171.05	19	3.3	724.696	3	19.7501	2330000	18000000	5067	20210526_HS_Frac2-3.raw	1	E9PFZ2|E9PFZ2_HUMAN;P00450|CERU_HUMAN	Deamidation (NQ)	N10:Deamidation (NQ):61.69	FALSE
LISVDTEHSNIYLQN(+0.98)GPDR	61.2	2171.05	19	-1.8	724.692	3	19.7874	869000	13800000	4700	20210526_HS_Frac3-2.raw	6	E9PFZ2|E9PFZ2_HUMAN;P00450|CERU_HUMAN	Deamidation (NQ)	N15:Deamidation (NQ):12.28	FALSE
LISVDTEHSNIYLQNGPDR	66.05	2170.07	19	0.8	724.366	3	19.6693	1020000	14400000	5067	20210526_HS_Frac2-3.raw	3	E9PFZ2|E9PFZ2_HUMAN;P00450|CERU_HUMAN			FALSE
LIYAASSLQSGVPSR	66.31	1547.83	15	3.9	774.928	2	18.954	626000	7840000	4405	20210526_HS_Frac3-3.raw	3				FALSE
LKC(+57.02)DEWSVNSVGK	55.86	1520.73	13	2.6	761.377	2	15.8447	6070000	35800000	3678	20210526_HS_Frac2-3.raw	5	P02787|TRFE_HUMAN	Carbamidomethylation	C3:Carbamidomethylation:1000.00	FALSE
LKEC(+57.02)C(+57.02)EKPLLEK	49.78	1545.79	12	1	516.273	3	7.3036	7710000	29600000	1513	20210526_HS_Frac2-3.raw	4	A0A0C4DGB6|A0A0C4DGB6_HUMAN;P02768|ALBU_HUMAN;C9JKR2|C9JKR2_HUMAN;D6RHD5|D6RHD5_HUMAN;B7WNR0|B7WNR0_HUMAN;H0YA55|H0YA55_HUMAN	Carbamidomethylation; Carbamidomethylation	C4:Carbamidomethylation:1000.00;C5:Carbamidomethylation:1000.00	FALSE
LLATLC(+57.02)SAEVC(+57.02)QC(+57.02)AEGK	68.42	1908.87	17	2.9	955.451	2	19.2126	1660000	20300000	4485	20210526_HS_Frac3-2.raw	3		Carbamidomethylation; Carbamidomethylation; Carbamidomethylation	C6:Carbamidomethylation:1000.00;C11:Carbamidomethylation:1000.00;C13:Carbamidomethylation:1000.00	FALSE
LLDNWDSVTSTFSK	66.19	1611.78	14	-0.8	806.898	2	23.3496	25200000	435000000	6232	20210526_HS_Frac3-3.raw	33	F8W696|F8W696_HUMAN;P02647|APOA1_HUMAN			FALSE
LLDSLPSDTR	46.06	1115.58	10	1.2	558.801	2	14.8381	20900000	151000000	3327	20210526_HS_Frac2-1.raw	13	H9KV48|H9KV48_HUMAN;P05155|IC1_HUMAN;E9PGN7|E9PGN7_HUMAN			FALSE
LLELTGPK	36.07	869.522	8	-2.2	435.769	2	15.5972	4050000	23800000	3595	20210526_HS_Frac2-1.raw	5	P04217|A1BG_HUMAN;M0R009|M0R009_HUMAN			FALSE
LLGEVDHYQLALGK	55.87	1554.84	14	2.2	519.291	3	21.2485	575000	9320000	5707	20210526_HS_Frac2-3.raw	3				FALSE
LLIYAVLPTGDVIGDSAK	54.97	1844.03	18	1.6	923.026	2	27.3471	1000000	10300000	7217	20210526_HS_Frac3-1.raw	7	P01023|A2MG_HUMAN			FALSE
LLIYDASNLETGVPSR	65.48	1746.92	16	3.5	874.471	2	22.2927	1380000	13200000	5618	20210526_HS_Frac3-3.raw	6	A0A2Q2TTZ9|A0A2Q2TTZ9_HUMAN			FALSE
LLIYDASNR	44.18	1063.57	9	0.3	532.793	2	15.3582	13900000	60500000	3484	20210526_HS_Frac2-3.raw	6				FALSE
LLIYDASSR	38.4	1036.56	9	0.9	519.288	2	15.5657	2560000	10100000	3540	20210526_HS_Frac2-3.raw	3				FALSE
LLIYDNNK	35.84	991.534	8	-0.1	496.776	2	12.1018	232000	402000	2603	20210526_HS_Frac2-3.raw	1				FALSE
LLIYGASTR	43.28	992.565	9	-2	497.291	2	15.6044	18000000	164000000	3592	20210526_HS_Frac2-3.raw	11				FALSE
LLIYWASTR	38.51	1121.62	9	2.7	561.822	2	22.7642	1020000	6010000	6265	20210526_HS_Frac2-1.raw	2				FALSE
LLLQM(+15.99)DSSATAYGSTVSK	73.66	1886.93	18	1.2	944.477	2	18.3243	499000	7870000	4047	20210526_HS_Frac4-2.raw	6	P04114|APOB_HUMAN	Oxidation (M)		FALSE
LLLQQVSLPE(+21.98)LPGEYSM(+15.99)K	43.29	2082.07	18	-3.7	695.03	3	26.6766	1060000	11200000	6953	20210526_HS_Frac4-1.raw	4	P01023|A2MG_HUMAN	Sodium adduct; Oxidation (M)	E10:Sodium adduct:67.69;M17:Oxidation (M):1000.00	FALSE
LLLQQVSLPELPGEYSM(+15.99)K	60.09	2060.09	18	-4.3	687.702	3	26.5916	13800000	123000000	6889	20210526_HS_Frac4-3.raw	14	P01023|A2MG_HUMAN	Oxidation (M)		FALSE
LLQDEFPGIPSPLDAAVEC(+57.02)HR	57.48	2363.16	21	1	788.73	3	26.3637	15100000	169000000	6926	20210526_HS_Frac3-2.raw	11	P02790|HEMO_HUMAN;Q9BS19|Q9BS19_HUMAN	Carbamidomethylation	C19:Carbamidomethylation:1000.00	FALSE
LLSGGNTLHLVSTTK	58.93	1539.86	15	0	514.297	3	18.7002	2960000	34300000	4699	20210526_HS_Frac2-3.raw	10	P04114|APOB_HUMAN			FALSE
LM(+15.99)NIFLK	41.8	893.505	7	-1	447.761	2	18.984	21700000	113000000	4742	20210526_HS_Frac2-3.raw	14	P01024|CO3_HUMAN	Oxidation (M)		FALSE
LM(+15.99)QC(+57.02)LPNPEDVK	54.68	1458.68	12	-2	730.351	2	17.2297	1220000	12600000	3798	20210526_HS_Frac3-3.raw	5	P04003|C4BPA_HUMAN	Oxidation (M); Carbamidomethylation	C4:Carbamidomethylation:1000.00	FALSE
LN(+0.98)DLEDALQQAK	47.18	1357.67	12	4.6	679.849	2	19.0259	54500	963000	4404	20210526_HS_Frac3-1.raw	1	#CONTAM#cont|000132|;#CONTAM#cont|000135|;#CONTAM#cont|000134|;P04264|K2C1_HUMAN	Deamidation (NQ)	N2:Deamidation (NQ):80.47	FALSE
LN(+0.98)GEIQALELPQK	66.79	1452.78	13	2.8	727.403	2	20.8338	2060000	18000000	4905	20210526_HS_Frac4-1.raw	5	P04114|APOB_HUMAN	Deamidation (NQ)	N2:Deamidation (NQ):46.21	FALSE
LNDLEDALQQAK	63.87	1356.69	12	-3.7	679.351	2	18.8835	3850000	56600000	4368	20210526_HS_Frac3-3.raw	3	#CONTAM#cont|000132|;#CONTAM#cont|000135|;#CONTAM#cont|000134|;P04264|K2C1_HUMAN			FALSE
LNGEIQALELPQK	65.94	1451.8	13	5.4	726.913	2	20.4342	272000	4620000	4954	20210526_HS_Frac3-3.raw	3	P04114|APOB_HUMAN			FALSE
LNM(+15.99)GITDLQGLR	64.61	1345.7	12	0.8	673.861	2	19.442	17000000	164000000	4568	20210526_HS_Frac3-3.raw	13		Oxidation (M)		FALSE
LPDATPTELAK	60.34	1154.62	11	2	578.319	2	14.7053	6300000	30500000	3305	20210526_HS_Frac2-1.raw	9	P02774|VTDB_HUMAN;D6RF35|D6RF35_HUMAN			FALSE
LPGIVAEGR	46.58	910.524	9	0.7	456.271	2	13.4619	2240000	8630000	2934	20210526_HS_Frac2-3.raw	6	P01008|ANT3_HUMAN			FALSE
LPLEYSYGEYR	53.52	1388.66	11	-0.7	695.34	2	19.4352	729000	10500000	4952	20210526_HS_Frac2-1.raw	6	F5GY80|F5GY80_HUMAN;P07358|CO8B_HUMAN;F5H7G1|F5H7G1_HUMAN			FALSE
LPPNVVEESAR	62.85	1209.64	11	2.7	605.829	2	10.5876	95900000	354000000	2331	20210526_HS_Frac2-1.raw	55	P01023|A2MG_HUMAN			FALSE
LPQQANDYLNSFNWER	57.15	1993.93	16	3.7	997.979	2	23.9411	1100000	10500000	6194	20210526_HS_Frac3-2.raw	3	P04114|APOB_HUMAN			FALSE
LPTDSELAPR	50	1097.57	10	1.4	549.796	2	12.7307	598000	1380000	2799	20210526_HS_Frac2-3.raw	2	A0A182DWH7|A0A182DWH7_HUMAN;P49908|SEPP1_HUMAN			FALSE
LPYSVVR	38.09	832.481	7	0.2	417.249	2	11.9763	9940000	63900000	2663	20210526_HS_Frac2-1.raw	18	P01024|CO3_HUMAN			FALSE
LPYTIITTPPLK	47.44	1355.81	12	1.9	678.915	2	23.5964	158000	1880000	6000	20210526_HS_Frac4-2.raw	4	P04114|APOB_HUMAN			FALSE
LQAILGVPWK	46.76	1123.68	10	4.6	562.85	2	24.2862	1180000	12100000	6797	20210526_HS_Frac2-3.raw	5	P01019|ANGT_HUMAN			FALSE
LQDED(+21.98)LGFL	40.76	1070.49	9	0.2	536.254	2	22.7138	1330000	10300000	5669	20210526_HS_Frac4-2.raw	3	H7C5H1|H7C5H1_HUMAN;E7ETN3|E7ETN3_HUMAN;P00751|CFAB_HUMAN;B4E1Z4|B4E1Z4_HUMAN	Sodium adduct	D5:Sodium adduct:20.26	FALSE
LQDFSDQLSDYYEK	63.97	1749.77	14	2.6	875.899	2	20.6335	3340000	25700000	5003	20210526_HS_Frac3-3.raw	6	P04114|APOB_HUMAN			FALSE
LQGTLPVEAR	40.1	1082.61	10	1.8	542.315	2	13.6887	1300000	4160000	3102	20210526_HS_Frac2-2.raw	2	P01031|CO5_HUMAN			FALSE
LQHLEN(+0.98)ELTHDIITK	64.02	1803.94	15	5.7	602.323	3	19.1956	849000	10500000	3751	20210526_HS_Frac1-3.raw	5		Deamidation (NQ)	N6:Deamidation (NQ):35.82	FALSE
LQHLENELTHDIITK	68.73	1802.95	15	5.4	601.995	3	19.7915	23500000	234000000	3901	20210526_HS_Frac1-3.raw	28				FALSE
LQPLDFK	39.25	859.48	7	-2.2	430.748	2	17.1795	7770000	42000000	4296	20210526_HS_Frac2-1.raw	8	P01008|ANT3_HUMAN			FALSE
LQPLDFKEN(+0.98)AEQSR	41.45	1674.82	14	6.4	559.286	3	16.9082	30800	1220000	4025	20210526_HS_Frac2-1.raw	1	P01008|ANT3_HUMAN	Deamidation (NQ)	N9:Deamidation (NQ):0.00	FALSE
LQSLFDSPDFSK	53.7	1382.67	12	1.4	692.347	2	21.4948	1480000	14000000	5338	20210526_HS_Frac3-3.raw	3	P36955|PEDF_HUMAN			FALSE
LRTEGDGVYTLNDK	50.57	1579.78	14	2	527.605	3	13.8039	1620000	5640000	3039	20210526_HS_Frac2-3.raw	4	P00738|HPT_HUMAN;J3QLC9|J3QLC9_HUMAN;H0Y300|H0Y300_HUMAN;A0A0C4DGL8|A0A0C4DGL8_HUMAN;J3KRH2|J3KRH2_HUMAN;J3QR68|J3QR68_HUMAN;P00739|HPTR_HUMAN			FALSE
LRTEGDGVYTLNNEK	27.08	1707.84	15	0.3	854.933	2	13.668			3021	20210526_HS_Frac2-3.raw	1	P00738|HPT_HUMAN;H3BMJ7|H3BMJ7_HUMAN;J3QLC9|J3QLC9_HUMAN;H3BS21|H3BS21_HUMAN;J3KSV1|J3KSV1_HUMAN;J3QQI8|J3QQI8_HUMAN;J3KRH2|J3KRH2_HUMAN			FALSE
LSFYYLIM(+15.99)AK	49.86	1263.66	10	2.1	632.839	2	25.4354	654000	5670000	7152	20210526_HS_Frac2-1.raw	3	H0YFH1|H0YFH1_HUMAN;P01023|A2MG_HUMAN	Oxidation (M)		FALSE
LSINTHPSQKPLSITVR	65.16	1890.07	17	1.5	473.525	4	19.5316	4060000	47600000	3794	20210526_HS_Frac1-1.raw	12	P01024|CO3_HUMAN			FALSE
LSITGTYDLK	48.56	1109.6	10	3.2	555.81	2	20.1416	124000000	889000000	4771	20210526_HS_Frac2-3.raw	77				FALSE
LSLEIEQLELQR	50.61	1469.81	12	-3	735.912	2	23.9597	1790000	27400000	6198	20210526_HS_Frac3-2.raw	7	P04003|C4BPA_HUMAN			FALSE
LSM(+15.99)DIDVSYK	45.24	1185.56	10	2.5	593.791	2	15.4345	413000	2600000	3518	20210526_HS_Frac2-3.raw	3	P01031|CO5_HUMAN	Oxidation (M)		FALSE
LSNNALSGLPQGVFGK	61.16	1600.86	16	3.9	801.442	2	22.9033	761000	9200000	5842	20210526_HS_Frac3-3.raw	3	P22792|CPN2_HUMAN			FALSE
LSNVLQQVK	49.44	1027.6	9	1.4	514.812	2	15.0298	3770000	16200000	3406	20210526_HS_Frac2-3.raw	4	P04114|APOB_HUMAN			FALSE
LSPIYNLVPVK	51.77	1241.74	11	2.6	621.88	2	23.6	4180000	37200000	6085	20210526_HS_Frac3-2.raw	6	P02748|CO9_HUMAN			FALSE
LSSGLVTAALYGR	40.46	1306.72	13	2.2	654.373	2	21.5165	110000	2100000	5330	20210526_HS_Frac3-2.raw	2				FALSE
LSSPATLNSR	48.94	1044.56	10	0	523.288	2	6.4685	11600000	42500000	1335	20210526_HS_Frac2-2.raw	30	#CONTAM#cont|000142|;#CONTAM#cont|000023|;#CONTAM#cont|000143|;#CONTAM#cont|000141|;#CONTAM#cont|000040|;#CONTAM#cont|000032|			FALSE
LSSPAVITDK	49.65	1029.57	10	-0.1	515.795	2	11.7494	5660000	14800000	2478	20210526_HS_Frac2-3.raw	8	P00747|PLMN_HUMAN			FALSE
LSSVTAADTAVYYC(+57.02)AR	46.3	1746.82	16	3.6	874.425	2	18.119	1080000	12500000	4086	20210526_HS_Frac3-1.raw	5		Carbamidomethylation	C14:Carbamidomethylation:1000.00	FALSE
LSSWVLLM(+15.99)K	48.16	1091.6	9	3.9	546.814	2	21.7879	33100000	245000000	5436	20210526_HS_Frac3-2.raw	9		Oxidation (M)		FALSE
LSSWVLLMK	35.37	1075.61	9	2	538.816	2	24.8321	26800	330000	6985	20210526_HS_Frac2-2.raw	1				FALSE
LSYTC(+57.02)EGGFR	47.95	1188.52	10	1.7	595.272	2	13.8804	3510000	17100000	3108	20210526_HS_Frac2-2.raw	9	P08603|CFAH_HUMAN	Carbamidomethylation	C5:Carbamidomethylation:1000.00	FALSE
LTISEQNIQR	42.75	1200.65	10	1.6	601.334	2	13.7051	5250000	42500000	3038	20210526_HS_Frac2-2.raw	9	A8MUN2|A8MUN2_HUMAN;P04114|APOB_HUMAN			FALSE
LTLDIQNK	40.69	943.534	8	-0.5	472.776	2	15.0426	3050000	14100000	3397	20210526_HS_Frac2-3.raw	3	P04114|APOB_HUMAN			FALSE
LTPLYELVK	44.71	1074.63	9	1.9	538.326	2	22.6912	592000	5080000	6200	20210526_HS_Frac2-1.raw	2	P10643|CO7_HUMAN			FALSE
LVAASQAALGL	57.39	1012.59	11	2.3	507.304	2	21.0842	79100000	469000000	3622	20210526_HS_Frac5-3.raw	115	A0A087WWT3|A0A087WWT3_HUMAN;P02768|ALBU_HUMAN;C9JKR2|C9JKR2_HUMAN;D6RHD5|D6RHD5_HUMAN;B7WNR0|B7WNR0_HUMAN;H0YA55|H0YA55_HUMAN			FALSE
LVAASQAALGL(+21.98)	35.62	1034.57	11	2	518.297	2	21.9367	182000	2190000	5323	20210526_HS_Frac4-1.raw	35	A0A087WWT3|A0A087WWT3_HUMAN;P02768|ALBU_HUMAN;C9JKR2|C9JKR2_HUMAN;D6RHD5|D6RHD5_HUMAN;B7WNR0|B7WNR0_HUMAN;H0YA55|H0YA55_HUMAN	Sodium adduct		FALSE
LVAYYTLIGASGQR	58.76	1510.81	14	3.2	756.419	2	22.309	8220000	100000000	5616	20210526_HS_Frac3-3.raw	8	P01024|CO3_HUMAN			FALSE
LVDKFLEDVK	55.59	1204.67	10	5.2	603.346	2	19.2282	1200000	14600000	3794	20210526_HS_Frac1-2.raw	4				FALSE
LVGFIDDAVK	48.39	1075.59	10	1.6	538.806	2	19.9494	2250000	21800000	5196	20210526_HS_Frac2-3.raw	3	P04114|APOB_HUMAN			FALSE
LVHVEEPHTETVR	59.91	1544.79	13	1.7	515.94	3	7.589	4470000	16600000	1439	20210526_HS_Frac1-1.raw	8	P01023|A2MG_HUMAN			FALSE
LVLLNAIYLSAK	42.48	1316.81	12	6.7	659.417	2	26.3575	37700	644000	7477	20210526_HS_Frac2-1.raw	1	H9KV48|H9KV48_HUMAN;P05155|IC1_HUMAN			FALSE
LVN(+0.98)EVTE(+21.98)FAK	37.69	1171.57	10	1.4	586.797	2	16.6335	2000000	15300000	3603	20210526_HS_Frac3-2.raw	4	A0A0C4DGB6|A0A0C4DGB6_HUMAN;A0A087WWT3|A0A087WWT3_HUMAN;P02768|ALBU_HUMAN;H7C013|H7C013_HUMAN	Deamidation (NQ); Sodium adduct	N3:Deamidation (NQ):1000.00;E7:Sodium adduct:12.16	FALSE
LVN(+0.98)EVTEFAK	58.82	1149.59	10	-7.4	575.801	2	16.6546	107000000	709000000	3610	20210526_HS_Frac3-3.raw	18	A0A0C4DGB6|A0A0C4DGB6_HUMAN;A0A087WWT3|A0A087WWT3_HUMAN;P02768|ALBU_HUMAN;H7C013|H7C013_HUMAN	Deamidation (NQ)		FALSE
LVN(+0.98)GQSHISLSK	40.61	1282.69	12	2.4	642.355	2	7.6332	581000	2460000	1711	20210526_HS_Frac2-1.raw	2		Deamidation (NQ)	N3:Deamidation (NQ):8.22	FALSE
LVNE(+21.98)VTEFAK	39.39	1170.59	10	1.6	586.305	2	32.3607	100000	472000	8865	20210526_HS_Frac2-2.raw	4	A0A0C4DGB6|A0A0C4DGB6_HUMAN;A0A087WWT3|A0A087WWT3_HUMAN;P02768|ALBU_HUMAN;H7C013|H7C013_HUMAN	Sodium adduct	E4:Sodium adduct:47.09	FALSE
LVNELTEFAK	41.99	1162.62	10	0.9	582.322	2	17.4366	8010000	72100000	4298	20210526_HS_Frac2-3.raw	7	#CONTAM#cont|000097|;#CONTAM#cont|000035|;#CONTAM#cont|000017|			FALSE
LVNEVTE(+21.98)FAK	56.78	1170.59	10	-2.9	586.303	2	16.9728	83900000	396000000	4048	20210526_HS_Frac2-3.raw	20	A0A0C4DGB6|A0A0C4DGB6_HUMAN;A0A087WWT3|A0A087WWT3_HUMAN;P02768|ALBU_HUMAN;H7C013|H7C013_HUMAN	Sodium adduct	E7:Sodium adduct:32.46	FALSE
LVNEVTEFAK	68.74	1148.61	10	-5	575.311	2	17.7253	510000000	2350000000	4332	20210526_HS_Frac2-3.raw	278	A0A0C4DGB6|A0A0C4DGB6_HUMAN;A0A087WWT3|A0A087WWT3_HUMAN;P02768|ALBU_HUMAN;H7C013|H7C013_HUMAN			FALSE
LVNEVTEFAKTC(+57.02)VADESAENC(+57.02)DK	62.86	2628.17	23	4.7	877.071	3	20.2824	286000	4910000	5324	20210526_HS_Frac2-3.raw	3	A0A0C4DGB6|A0A0C4DGB6_HUMAN;A0A087WWT3|A0A087WWT3_HUMAN;P02768|ALBU_HUMAN;H7C013|H7C013_HUMAN	Carbamidomethylation; Carbamidomethylation	C12:Carbamidomethylation:1000.00;C21:Carbamidomethylation:1000.00	FALSE
LVNGQ(+0.98)SHISLSK	39.8	1282.69	12	0.8	642.354	2	8.0831	390000	1640000	1778	20210526_HS_Frac2-2.raw	1		Deamidation (NQ)	Q5:Deamidation (NQ):0.00	FALSE
LVPFATELHER	43.6	1310.7	11	-0.9	437.906	3	19.7262	29500	446000	3871	20210526_HS_Frac1-1.raw	1	P06727|APOA4_HUMAN			FALSE
LVRPE(+21.98)VD(+21.98)VMC(+57.02)TAFHDNEETFLK	35.63	2693.22	22	7.9	898.758	3	24.7299	34400000	208000000	6973	20210526_HS_Frac2-1.raw	4	A0A0C4DGB6|A0A0C4DGB6_HUMAN;A0A087WWT3|A0A087WWT3_HUMAN;P02768|ALBU_HUMAN;H7C013|H7C013_HUMAN	Sodium adduct; Sodium adduct; Carbamidomethylation	E5:Sodium adduct:47.07;D7:Sodium adduct:53.45;C10:Carbamidomethylation:1000.00	FALSE
LVRPE(+21.98)VD(+21.98)VMC(+57.02)TAFHDNEETFLKK	61.16	2821.32	23	2.3	706.341	4	23.4813	3400000	40300000	6518	20210526_HS_Frac2-3.raw	2	A0A0C4DGB6|A0A0C4DGB6_HUMAN;A0A087WWT3|A0A087WWT3_HUMAN;P02768|ALBU_HUMAN;H7C013|H7C013_HUMAN	Sodium adduct; Sodium adduct; Carbamidomethylation	E5:Sodium adduct:74.64;D7:Sodium adduct:81.34;C10:Carbamidomethylation:1000.00	FALSE
LVRPEVD(+21.98)VM(+15.99)C(+57.02)TAFHDNEETFLK	56.08	2687.23	22	6.7	672.823	4	22.2716	732000	7250000	6154	20210526_HS_Frac2-3.raw	1	A0A0C4DGB6|A0A0C4DGB6_HUMAN;A0A087WWT3|A0A087WWT3_HUMAN;P02768|ALBU_HUMAN;H7C013|H7C013_HUMAN	Sodium adduct; Oxidation (M); Carbamidomethylation	D7:Sodium adduct:22.20;M9:Oxidation (M):1000.00;C10:Carbamidomethylation:1000.00	FALSE
LVRPEVD(+21.98)VMC(+57.02)TAFHDNEETFLK	40.49	2671.24	22	0.1	891.424	3	23.3447	142000	1300000	6458	20210526_HS_Frac2-3.raw	1	A0A0C4DGB6|A0A0C4DGB6_HUMAN;A0A087WWT3|A0A087WWT3_HUMAN;P02768|ALBU_HUMAN;H7C013|H7C013_HUMAN	Sodium adduct; Carbamidomethylation	D7:Sodium adduct:26.31;C10:Carbamidomethylation:1000.00	FALSE
LVRPEVDVM(+15.99)C(+57.02)TAFHD(+21.98)N(+0.98)EETFLK	41.8	2688.22	22	-6.3	897.077	3	23.1251	320000	2870000	6382	20210526_HS_Frac2-1.raw	1	A0A0C4DGB6|A0A0C4DGB6_HUMAN;A0A087WWT3|A0A087WWT3_HUMAN;P02768|ALBU_HUMAN;H7C013|H7C013_HUMAN	Oxidation (M); Carbamidomethylation; Sodium adduct; Deamidation (NQ)	M9:Oxidation (M):1000.00;C10:Carbamidomethylation:1000.00;D15:Sodium adduct:0.00;N16:Deamidation (NQ):1000.00	FALSE
LVRPEVDVM(+15.99)C(+57.02)TAFHD(+21.98)NE(+21.98)ETFLK	36.38	2709.22	22	2.8	904.085	3	22.3087	52400	845000	6074	20210526_HS_Frac2-1.raw	1	A0A0C4DGB6|A0A0C4DGB6_HUMAN;A0A087WWT3|A0A087WWT3_HUMAN;P02768|ALBU_HUMAN;H7C013|H7C013_HUMAN	Oxidation (M); Carbamidomethylation; Sodium adduct; Sodium adduct	M9:Oxidation (M):1000.00;C10:Carbamidomethylation:1000.00;D15:Sodium adduct:7.77;E17:Sodium adduct:0.00	FALSE
LVRPEVDVM(+15.99)C(+57.02)TAFHD(+21.98)NEETFLK	43.58	2687.23	22	1	896.756	3	24.4382	621000	6110000	6870	20210526_HS_Frac2-1.raw	6	A0A0C4DGB6|A0A0C4DGB6_HUMAN;A0A087WWT3|A0A087WWT3_HUMAN;P02768|ALBU_HUMAN;H7C013|H7C013_HUMAN	Oxidation (M); Carbamidomethylation; Sodium adduct	M9:Oxidation (M):1000.00;C10:Carbamidomethylation:1000.00;D15:Sodium adduct:13.33	FALSE
LVRPEVDVM(+15.99)C(+57.02)TAFHDN(+0.98)EETFLK	51.79	2666.24	22	7.4	667.573	4	22.377	9980000	354000000	5640	20210526_HS_Frac3-2.raw	6	A0A0C4DGB6|A0A0C4DGB6_HUMAN;A0A087WWT3|A0A087WWT3_HUMAN;P02768|ALBU_HUMAN;H7C013|H7C013_HUMAN	Oxidation (M); Carbamidomethylation; Deamidation (NQ)	C10:Carbamidomethylation:1000.00	FALSE
LVRPEVDVM(+15.99)C(+57.02)TAFHDNE(+21.98)ETFLK	70.74	2687.23	22	-0.8	896.755	3	22.2468	2610000	37800000	6081	20210526_HS_Frac2-3.raw	3	A0A0C4DGB6|A0A0C4DGB6_HUMAN;A0A087WWT3|A0A087WWT3_HUMAN;P02768|ALBU_HUMAN;H7C013|H7C013_HUMAN	Oxidation (M); Carbamidomethylation; Sodium adduct	M9:Oxidation (M):1000.00;C10:Carbamidomethylation:1000.00;E17:Sodium adduct:17.01	FALSE
LVRPEVDVM(+15.99)C(+57.02)TAFHDNEETFLK	90.4	2665.25	22	0.4	667.323	4	25.8561	114000000	1110000000	7317	20210526_HS_Frac2-2.raw	180	A0A0C4DGB6|A0A0C4DGB6_HUMAN;A0A087WWT3|A0A087WWT3_HUMAN;P02768|ALBU_HUMAN;H7C013|H7C013_HUMAN	Oxidation (M); Carbamidomethylation	C10:Carbamidomethylation:1000.00	FALSE
LVRPEVDVM(+15.99)C(+57.02)TAFHDNEETFLKK	80.97	2793.35	23	0.8	699.347	4	21.2784	7200000	65900000	5698	20210526_HS_Frac2-3.raw	11	A0A0C4DGB6|A0A0C4DGB6_HUMAN;A0A087WWT3|A0A087WWT3_HUMAN;P02768|ALBU_HUMAN;H7C013|H7C013_HUMAN	Oxidation (M); Carbamidomethylation	C10:Carbamidomethylation:1000.00	FALSE
LVRPEVDVMC(+57.02)TAFHDNEETFLK	76.96	2649.26	22	1.4	663.325	4	24.6954	1710000	21800000	6907	20210526_HS_Frac2-1.raw	6	A0A0C4DGB6|A0A0C4DGB6_HUMAN;A0A087WWT3|A0A087WWT3_HUMAN;P02768|ALBU_HUMAN;H7C013|H7C013_HUMAN	Carbamidomethylation	C10:Carbamidomethylation:1000.00	FALSE
LWWLDLK	38.72	972.543	7	-0.9	487.281	2	27.1093	892000	5450000	7669	20210526_HS_Frac2-3.raw	3	P02790|HEMO_HUMAN			FALSE
LYGSEAFATDFQDSAAAK	69.34	1890.86	18	1.5	946.444	2	20.8629	13100000	133000000	4961	20210526_HS_Frac4-2.raw	13	G3V595|G3V595_HUMAN;P01011|AACT_HUMAN			FALSE
LYHSEAFTVN(+0.98)FGDTEEAK	41.91	2057.92	18	3.1	686.986	3	20.4255	421000	5650000	5383	20210526_HS_Frac2-3.raw	4		Deamidation (NQ)		FALSE
LYHSEAFTVNFGDTEEAK	70.88	2056.94	18	0.1	1029.48	2	20.8747	14400000	80500000	5550	20210526_HS_Frac2-3.raw	10				FALSE
LYHSEAFTVNFGDTEEAKK	76.1	2185.03	19	2.3	547.267	4	20.3182	2570000	21400000	4016	20210526_HS_Frac1-1.raw	6				FALSE
M(+15.99)C(+57.02)PQLQQYEM(+15.99)HGPEGLR	70.52	2104.91	17	1.4	702.649	3	17.5762	11500000	90500000	4251	20210526_HS_Frac2-2.raw	6	P01023|A2MG_HUMAN	Oxidation (M); Carbamidomethylation; Oxidation (M)	C2:Carbamidomethylation:1000.00	FALSE
M(+15.99)EEVE(+21.98)AM(+15.99)LLPETLK	42.2	1685.79	14	3	562.94	3	21.584	426000	6300000	5371	20210526_HS_Frac3-3.raw	3	G3V595|G3V595_HUMAN;G3V3A0|G3V3A0_HUMAN;A0A087WY93|A0A087WY93_HUMAN;P01011|AACT_HUMAN	Oxidation (M); Sodium adduct; Oxidation (M)	M1:Oxidation (M):1000.00;E5:Sodium adduct:5.99;M7:Oxidation (M):1000.00	FALSE
M(+15.99)EEVEAM(+15.99)LLPETLK	66.76	1663.8	14	1	832.913	2	21.6053	9830000	131000000	5361	20210526_HS_Frac3-2.raw	10	G3V595|G3V595_HUMAN;G3V3A0|G3V3A0_HUMAN;A0A087WY93|A0A087WY93_HUMAN;P01011|AACT_HUMAN	Oxidation (M); Oxidation (M)		FALSE
M(+15.99)EEVEAM(+15.99)LLPETLKR	60.74	1819.91	15	2.6	607.647	3	20.4399	2090000	22600000	5378	20210526_HS_Frac2-3.raw	4	G3V595|G3V595_HUMAN;G3V3A0|G3V3A0_HUMAN;A0A087WY93|A0A087WY93_HUMAN;P01011|AACT_HUMAN	Oxidation (M); Oxidation (M)		FALSE
M(+15.99)FLSFPTTK	53.29	1086.54	9	5	544.283	2	20.5702	415000	4770000	4992	20210526_HS_Frac3-3.raw	5	P69905|HBA_HUMAN;A0A2R8Y7C0|A0A2R8Y7C0_HUMAN	Oxidation (M)		FALSE
M(+15.99)FTTAPDQVDKEDEDFQESNK	82.27	2489.05	21	2.6	830.697	3	16.7597	12300000	104000000	3980	20210526_HS_Frac2-2.raw	8	E9PFZ2|E9PFZ2_HUMAN;H7C5R1|H7C5R1_HUMAN;P00450|CERU_HUMAN	Oxidation (M)		FALSE
M(+15.99)LEVPYVDR	36.24	1136.55	9	-1	569.285	2	18.4688	534000	7570000	4563	20210526_HS_Frac2-1.raw	5	P00742|FA10_HUMAN	Oxidation (M)		FALSE
M(+15.99)NTVIAALSR	59.88	1090.58	10	3.2	546.302	2	16.76	2140000	11900000	3977	20210526_HS_Frac2-3.raw	4	P08185|CBG_HUMAN	Oxidation (M)		FALSE
M(+15.99)PGTVATLR	47.33	960.506	9	-2.7	481.261	2	19.165	16000000	105000000	4281	20210526_HS_Frac4-3.raw	12		Oxidation (M)		FALSE
M(+15.99)SAVEGIC(+57.02)TSESPVIDHQGTK	64.72	2261.03	21	1.4	754.688	3	17.0963	251000	7970000	4108	20210526_HS_Frac2-2.raw	4	P01031|CO5_HUMAN	Oxidation (M); Carbamidomethylation	C8:Carbamidomethylation:1000.00	FALSE
M(+15.99)TLDDFR	36.3	912.401	7	1.4	457.21	2	8.0602	865000	2100000	1763	20210526_HS_Frac2-3.raw	4	K7EQQ3|K7EQQ3_HUMAN;P35527|K1C9_HUMAN	Oxidation (M)		FALSE
M(+15.99)TSNFPVDLSDYPK	60.7	1628.74	14	2.2	815.381	2	21.1989	4760000	46900000	5206	20210526_HS_Frac3-3.raw	3	P04114|APOB_HUMAN	Oxidation (M)		FALSE
M(+15.99)TVSTLVLGEGATEAEISM(+15.99)TSTR	39.66	2415.15	23	1.3	806.062	3	21.9101	118000	1550000	5309	20210526_HS_Frac4-1.raw	1	P02760|AMBP_HUMAN;S4R3Y4|S4R3Y4_HUMAN	Oxidation (M); Oxidation (M)		FALSE
M(+15.99)VSGFIPLKPTVK	58	1431.82	13	5	716.919	2	20.724	21700000	141000000	4109	20210526_HS_Frac1-1.raw	21	P01023|A2MG_HUMAN;P20742|PZP_HUMAN	Oxidation (M)		FALSE
M(+15.99)YLGYE(+21.98)YVTAIR	44.92	1515.7	12	-1	506.243	3	21.9432	217000	1800000	5491	20210526_HS_Frac3-2.raw	3	P02787|TRFE_HUMAN	Oxidation (M); Sodium adduct	M1:Oxidation (M):1000.00;E6:Sodium adduct:72.73	FALSE
M(+15.99)YLGYEYVTAIR	65.06	1493.72	12	-5.2	747.867	2	21.8964	54800000	549000000	5303	20210526_HS_Frac4-3.raw	58	P02787|TRFE_HUMAN	Oxidation (M)		FALSE
M(+15.99)YQM(+15.99)DIQQELQR	52.55	1613.72	12	0.7	807.87	2	16.3969	2390000	11600000	3512	20210526_HS_Frac3-3.raw	4	P04114|APOB_HUMAN	Oxidation (M); Oxidation (M)		FALSE
M(+15.99)YYSAVDPTKDIFTGLIGPM(+15.99)K	40.15	2378.15	21	-5.2	793.725	3	25.7672	169000	2640000	7293	20210526_HS_Frac2-3.raw	3	P00450|CERU_HUMAN	Oxidation (M); Oxidation (M)		FALSE
MPGTVATLR	41.75	944.511	9	-2.6	473.264	2	19.4279	8270000	27300000	4954	20210526_HS_Frac2-2.raw	18				FALSE
MYLGYEYVTAIR	53.89	1477.73	12	1.6	739.874	2	23.4794	319000	3760000	6032	20210526_HS_Frac3-1.raw	3	P02787|TRFE_HUMAN			FALSE
N(+0.98)EC(+57.02)FLQHK	38	1075.48	8	-0.7	538.747	2	6.6656	851000	5630000	1355	20210526_HS_Frac2-3.raw	7	A0A0C4DGB6|A0A0C4DGB6_HUMAN;A0A087WWT3|A0A087WWT3_HUMAN;P02768|ALBU_HUMAN;H7C013|H7C013_HUMAN	Deamidation (NQ); Carbamidomethylation	N1:Deamidation (NQ):58.00;C3:Carbamidomethylation:1000.00	FALSE
N(+0.98)EC(+57.02)FLQHKDDNPNLPR	36.23	1996.91	16	2.3	666.647	3	16.8389	126000	1960000	4011	20210526_HS_Frac2-3.raw	1	A0A0C4DGB6|A0A0C4DGB6_HUMAN;A0A087WWT3|A0A087WWT3_HUMAN;P02768|ALBU_HUMAN;H7C013|H7C013_HUMAN	Deamidation (NQ); Carbamidomethylation	N1:Deamidation (NQ):23.70;C3:Carbamidomethylation:1000.00	FALSE
N(+0.98)EDSLVFVQTDK	53.68	1394.66	12	-2	698.337	2	18.7966	71400	1020000	4157	20210526_HS_Frac4-1.raw	1	P01023|A2MG_HUMAN;F8W7L3|F8W7L3_HUMAN	Deamidation (NQ)	N1:Deamidation (NQ):81.34	FALSE
N(+0.98)FPSPVDAAFR	48.39	1220.58	11	-0.1	611.301	2	21.5279	460000	6030000	5178	20210526_HS_Frac4-3.raw	3	P02790|HEMO_HUMAN;Q9BS19|Q9BS19_HUMAN	Deamidation (NQ)		FALSE
N(+0.98)GIDIYSLTVDSR	52.54	1452.71	13	0.2	727.365	2	22.6517	279000	2720000	5596	20210526_HS_Frac4-3.raw	3	Q14624|ITIH4_HUMAN;B7ZKJ8|B7ZKJ8_HUMAN	Deamidation (NQ)		FALSE
N(+0.98)GVAQEPVHLDSPAIK	65.93	1674.86	16	5	838.443	2	18.6019	2480000	30400000	4276	20210526_HS_Frac3-3.raw	13	P04217|A1BG_HUMAN;M0R009|M0R009_HUMAN	Deamidation (NQ)	N1:Deamidation (NQ):16.51	FALSE
N(+0.98)NALDFVTK	46.08	1021.51	9	1.8	511.764	2	17.3581	29300	271000	3818	20210526_HS_Frac3-1.raw	1	P04114|APOB_HUMAN	Deamidation (NQ)	N1:Deamidation (NQ):0.00	FALSE
N(+0.98)NEGTYYSPNYNPQSR	40.52	1903.8	16	2.5	952.912	2	13.9711	503000	1440000	2795	20210526_HS_Frac4-3.raw	2	E9PFZ2|E9PFZ2_HUMAN;H7C5R1|H7C5R1_HUMAN;P00450|CERU_HUMAN	Deamidation (NQ)	N1:Deamidation (NQ):0.00	FALSE
N(+0.98)QVSLTC(+57.02)LVK	42.4	1161.61	10	5.2	581.816	2	19.5222	1600000	18400000	5026	20210526_HS_Frac2-3.raw	5	P01859|IGHG2_HUMAN;A0A4W9A917|A0A4W9A917_HUMAN;P01857|IGHG1_HUMAN;P01861|IGHG4_HUMAN;P01860|IGHG3_HUMAN;A0A286YEY4|A0A286YEY4_HUMAN;A0A0A0MS08|A0A0A0MS08_HUMAN;A0A286YFJ8|A0A286YFJ8_HUMAN;A0A0A0MS07|A0A0A0MS07_HUMAN;A0A286YES1|A0A286YES1_HUMAN	Deamidation (NQ); Carbamidomethylation	N1:Deamidation (NQ):0.00;C7:Carbamidomethylation:1000.00	FALSE
N(+0.98)SLYLQM(+15.99)N(+0.98)SLR	47.16	1355.64	11	-0.8	678.829	2	18.0323	144000	1770000	3884	20210526_HS_Frac4-1.raw	3		Deamidation (NQ); Oxidation (M); Deamidation (NQ)	N1:Deamidation (NQ):56.51;M7:Oxidation (M):1000.00;N8:Deamidation (NQ):22.85	FALSE
N(+0.98)SLYLQM(+15.99)NSLR	41.06	1354.66	11	-1.3	678.336	2	17.5179	541000	2560000	3847	20210526_HS_Frac3-2.raw	1		Deamidation (NQ); Oxidation (M)	N1:Deamidation (NQ):53.92;M7:Oxidation (M):1000.00	FALSE
NADYSYSVWK	40.33	1231.55	10	5.2	616.789	2	17.5948	115000	1500000	4287	20210526_HS_Frac2-3.raw	1	P01031|CO5_HUMAN			FALSE
NALALFVLPK	54.54	1084.66	10	2.5	543.343	2	25.9883	585000	5560000	7348	20210526_HS_Frac2-2.raw	3	#CONTAM#cont|000072|;P05543|THBG_HUMAN			FALSE
NEC(+57.02)FLQHK	37.03	1074.49	8	-4.5	538.253	2	5.8466	207000	1350000	1141	20210526_HS_Frac2-2.raw	2	A0A0C4DGB6|A0A0C4DGB6_HUMAN;A0A087WWT3|A0A087WWT3_HUMAN;P02768|ALBU_HUMAN;H7C013|H7C013_HUMAN	Carbamidomethylation	C3:Carbamidomethylation:1000.00	FALSE
NEC(+57.02)FLQHKDDNPNLPR	61.23	1995.92	16	3.4	499.99	4	16.3982	2210000	21300000	3065	20210526_HS_Frac1-3.raw	15	A0A0C4DGB6|A0A0C4DGB6_HUMAN;A0A087WWT3|A0A087WWT3_HUMAN;P02768|ALBU_HUMAN;H7C013|H7C013_HUMAN	Carbamidomethylation	C3:Carbamidomethylation:1000.00	FALSE
NEDSLVFVQTDK	65.22	1393.67	12	-8.5	697.84	2	18.024	24600000	186000000	4122	20210526_HS_Frac3-3.raw	19	P01023|A2MG_HUMAN;F8W7L3|F8W7L3_HUMAN			FALSE
NFGYTLR	36.33	869.439	7	0.8	435.729	2	15.2601	423000	1610000	3489	20210526_HS_Frac2-3.raw	2	P05546|HEP2_HUMAN			FALSE
NFPSPVDAAFR	64.47	1219.6	11	-2.4	610.808	2	20.7076	48800000	435000000	5476	20210526_HS_Frac2-3.raw	34	P02790|HEMO_HUMAN;Q9BS19|Q9BS19_HUMAN			FALSE
NGVAQEPVHLDSPAIK	57.25	1673.87	16	5	558.97	3	17.9784	1260000	12200000	4420	20210526_HS_Frac2-2.raw	3	P04217|A1BG_HUMAN;M0R009|M0R009_HUMAN			FALSE
NIILPVYDK	52.89	1073.61	9	3.4	537.817	2	20.1887	5240000	46800000	5270	20210526_HS_Frac2-3.raw	6	P04114|APOB_HUMAN			FALSE
NILTSN(+0.98)NIDVK	48.2	1230.65	11	2.4	616.334	2	17.2131	872000	9130000	3794	20210526_HS_Frac3-3.raw	4	P05090|APOD_HUMAN;C9JF17|C9JF17_HUMAN	Deamidation (NQ)	N6:Deamidation (NQ):11.06	FALSE
NILTSNNIDVK	52.28	1229.66	11	-4.4	615.838	2	17.0327			4091	20210526_HS_Frac2-3.raw	6	P05090|APOD_HUMAN;C9JF17|C9JF17_HUMAN			FALSE
NIQEYLSILTDPDGK	49.3	1704.86	15	6.9	853.444	2	26.658	33300	515000	7058	20210526_HS_Frac3-1.raw	1	P04114|APOB_HUMAN			FALSE
NLAVSQVVHK	58.22	1093.62	10	5.6	547.822	2	11.9015	5890000	13100000	2140	20210526_HS_Frac1-3.raw	9	G3V3A0|G3V3A0_HUMAN;P01011|AACT_HUMAN			FALSE
NLNEKDYELLC(+57.02)LDGTR	73.4	1951.93	16	0.9	976.977	2	21.4215	30600000	350000000	5750	20210526_HS_Frac2-2.raw	18	P02787|TRFE_HUMAN	Carbamidomethylation	C11:Carbamidomethylation:1000.00	FALSE
NLQNNAEWVYQGAIR	61.95	1774.88	15	4.4	888.452	2	21.3643	476000	5510000	5286	20210526_HS_Frac3-2.raw	4	P04114|APOB_HUMAN			FALSE
NM(+15.99)EQFQVSVSVAPNAK	60.51	1763.85	16	2.2	882.937	2	18.9204	262000	1760000	4342	20210526_HS_Frac3-1.raw	1	Q14624|ITIH4_HUMAN;B7ZKJ8|B7ZKJ8_HUMAN	Oxidation (M)		FALSE
NN(+0.98)ALDFVTK	57.23	1021.51	9	3.2	511.765	2	17.8737	180000	2480000	3825	20210526_HS_Frac4-1.raw	3	P04114|APOB_HUMAN	Deamidation (NQ)	N2:Deamidation (NQ):7.65	FALSE
NNALDFVTK	49.89	1020.52	9	2.2	511.272	2	16.9068	3040000	17000000	3701	20210526_HS_Frac3-2.raw	5	P04114|APOB_HUMAN			FALSE
NNEGTYYSPNYNPQSR	44.56	1902.81	16	1.4	952.419	2	13.5626	2950000	8150000	2766	20210526_HS_Frac3-2.raw	4	E9PFZ2|E9PFZ2_HUMAN;H7C5R1|H7C5R1_HUMAN;P00450|CERU_HUMAN			FALSE
NPDADKGPWC(+57.02)FTTDPSVR	41.92	2061.92	18	3	688.319	3	20.5764			5387	20210526_HS_Frac2-1.raw	1	P00747|PLMN_HUMAN	Carbamidomethylation	C10:Carbamidomethylation:1000.00	FALSE
NPDGDVGGPWC(+57.02)YTTNPR	77.65	1904.81	17	1.8	953.418	2	18.9188	1240000	8630000	4389	20210526_HS_Frac3-3.raw	3	P00747|PLMN_HUMAN	Carbamidomethylation	C11:Carbamidomethylation:1000.00	FALSE
NPN(+0.98)GYSFSIPVK	58.88	1322.65	12	4.1	662.338	2	20.7443	2450000	20600000	5051	20210526_HS_Frac3-3.raw	3	P04114|APOB_HUMAN	Deamidation (NQ)	N3:Deamidation (NQ):22.85	FALSE
NPNLPPETVDSLK	48.96	1422.74	13	-2.5	712.376	2	17.9079	2550000	11800000	3990	20210526_HS_Frac3-3.raw	3	P05090|APOD_HUMAN;C9JF17|C9JF17_HUMAN			FALSE
NQ(+0.98)VSLTC(+57.02)LVK	51.55	1161.61	10	2.6	581.814	2	19.6409	9950000	117000000	4666	20210526_HS_Frac3-3.raw	11	P01859|IGHG2_HUMAN;A0A4W9A917|A0A4W9A917_HUMAN;P01857|IGHG1_HUMAN;P01861|IGHG4_HUMAN;P01860|IGHG3_HUMAN;A0A286YEY4|A0A286YEY4_HUMAN;A0A0A0MS08|A0A0A0MS08_HUMAN;A0A286YFJ8|A0A286YFJ8_HUMAN;A0A0A0MS07|A0A0A0MS07_HUMAN;A0A286YES1|A0A286YES1_HUMAN	Deamidation (NQ); Carbamidomethylation	Q2:Deamidation (NQ):0.00;C7:Carbamidomethylation:1000.00	FALSE
NQGNTWLTAFVLK	60.72	1490.79	13	-0.2	746.404	2	27.1858	1400000	14000000	7105	20210526_HS_Frac3-3.raw	6	P01023|A2MG_HUMAN;P20742|PZP_HUMAN			FALSE
NQVSLTC(+57.02)LVK	61.94	1160.62	10	-8.3	581.316	2	18.9903	128000000	946000000	4806	20210526_HS_Frac2-2.raw	91	P01859|IGHG2_HUMAN;A0A4W9A917|A0A4W9A917_HUMAN;P01857|IGHG1_HUMAN;P01861|IGHG4_HUMAN;P01860|IGHG3_HUMAN;A0A286YEY4|A0A286YEY4_HUMAN;A0A0A0MS08|A0A0A0MS08_HUMAN;A0A286YFJ8|A0A286YFJ8_HUMAN;A0A0A0MS07|A0A0A0MS07_HUMAN;A0A286YES1|A0A286YES1_HUMAN	Carbamidomethylation	C7:Carbamidomethylation:1000.00	FALSE
NSLYLQ(+0.98)M(+15.99)NSLR	37.41	1354.66	11	7	678.342	2	17.0044	101000	1790000	3551	20210526_HS_Frac4-1.raw	4		Deamidation (NQ); Oxidation (M)	Q6:Deamidation (NQ):20.41;M7:Oxidation (M):1000.00	FALSE
NSLYLQM(+15.99)N(+0.98)SLK	37.08	1326.65	11	8.6	664.34	2	16.8736	354000	4440000	4039	20210526_HS_Frac2-2.raw	2		Oxidation (M); Deamidation (NQ)	M7:Oxidation (M):1000.00;N8:Deamidation (NQ):20.41	FALSE
NSLYLQM(+15.99)N(+0.98)SLR	42.75	1354.66	11	0	678.337	2	17.1795	897000	6940000	4122	20210526_HS_Frac2-1.raw	3		Oxidation (M); Deamidation (NQ)	M7:Oxidation (M):1000.00;N8:Deamidation (NQ):22.85	FALSE
NSLYLQM(+15.99)NSLR	53.12	1353.67	11	2.5	677.847	2	16.784	3720000	23600000	3981	20210526_HS_Frac2-3.raw	7		Oxidation (M)		FALSE
NTEILTGSWSD(+21.98)QTYPEGTQAIYK	38.03	2623.21	23	6.5	875.418	3	23.0273			5791	20210526_HS_Frac4-2.raw	1	A0A0D9SG88|A0A0D9SG88_HUMAN;P08603|CFAH_HUMAN;Q5TFM2|Q5TFM2_HUMAN	Sodium adduct	D11:Sodium adduct:23.70	FALSE
NTEILTGSWSDQTYPEGTQAIYK	38.32	2601.22	23	1.6	868.086	3	23.1192	515000	5000000	5762	20210526_HS_Frac4-1.raw	3	A0A0D9SG88|A0A0D9SG88_HUMAN;P08603|CFAH_HUMAN;Q5TFM2|Q5TFM2_HUMAN			FALSE
NTEQEEGGEAVHEVEVVIK	48.03	2095.01	19	3.3	699.348	3	20.3142	126000	2560000	5327	20210526_HS_Frac2-2.raw	3	P00742|FA10_HUMAN			FALSE
NTLELSN(+0.98)GVIVK	52.86	1286.71	12	2.8	644.365	2	19.597	2100000	30000000	4645	20210526_HS_Frac3-3.raw	5	P04114|APOB_HUMAN	Deamidation (NQ)	N7:Deamidation (NQ):76.27	FALSE
NTLIIYLDK	43.47	1091.62	9	1.7	546.821	2	21.2105			5195	20210526_HS_Frac3-1.raw	1	P01024|CO3_HUMAN;M0QYC8|M0QYC8_HUMAN			FALSE
NTLYLQ(+0.98)M(+15.99)NSLR	43.06	1368.67	11	8.3	685.351	2	17.3302	259000	2860000	3647	20210526_HS_Frac4-1.raw	2		Deamidation (NQ); Oxidation (M)	Q6:Deamidation (NQ):10.42;M7:Oxidation (M):1000.00	FALSE
NTLYLQM(+15.99)N(+0.98)SLR	48.05	1368.67	11	0.7	685.346	2	17.3414	2180000	23900000	3828	20210526_HS_Frac3-2.raw	8		Oxidation (M); Deamidation (NQ)	M7:Oxidation (M):1000.00;N8:Deamidation (NQ):32.28	FALSE
NTLYLQM(+15.99)NSLR	44.43	1367.69	11	-0.9	684.853	2	17.0565	1600000	19100000	4093	20210526_HS_Frac2-3.raw	3		Oxidation (M)		FALSE
NVPLPVIAELPPK	63.09	1385.83	13	0.4	693.924	2	24.78	20700000	102000000	6566	20210526_HS_Frac3-3.raw	22	P01871|IGHM_HUMAN			FALSE
NVQDAIADAEQR	63.9	1328.63	12	3.2	665.328	2	14.1788	744000	3140000	2906	20210526_HS_Frac3-3.raw	4	P35908|K22E_HUMAN			FALSE
NVSTGDVNVEM(+15.99)NAAPGVDLTQLLNNM(+15.99)R	41.43	2903.38	27	4	968.806	3	25.2054	345000	3990000	6490	20210526_HS_Frac4-1.raw	2	#CONTAM#cont|000133|;P13645|K1C10_HUMAN;#CONTAM#cont|000129|;#CONTAM#cont|000136|;#CONTAM#cont|000122|;#CONTAM#cont|000130|	Oxidation (M); Oxidation (M)		FALSE
NVVFVIDK	48.28	932.533	8	5.3	467.278	2	18.3433	227000	4860000	4557	20210526_HS_Frac2-3.raw	2	Q14624|ITIH4_HUMAN;B7ZKJ8|B7ZKJ8_HUMAN;H7C0L5|H7C0L5_HUMAN			FALSE
NWETEITAQPDGGK	52.23	1544.71	14	4.1	773.368	2	17.7969	122000	1790000	3966	20210526_HS_Frac3-1.raw	2	P05452|TETN_HUMAN;E9PHK0|E9PHK0_HUMAN			FALSE
NWGLSVYADKPETTK	64.09	1707.85	15	1.9	854.936	2	19.4422	2340000	37800000	4983	20210526_HS_Frac2-2.raw	8	P02763|A1AG1_HUMAN			FALSE
NYNLVESLK	54.4	1078.57	9	5.4	540.295	2	18.605	2060000	24500000	4273	20210526_HS_Frac3-2.raw	8	P05546|HEP2_HUMAN			FALSE
Q(+0.98)EPSQGTTTFAVTSILR	49.78	1835.93	17	0.8	918.975	2	24.6747	486000	6490000	6344	20210526_HS_Frac4-1.raw	2	P01876|IGHA1_HUMAN;A0A286YEY1|A0A286YEY1_HUMAN	Deamidation (NQ)	Q1:Deamidation (NQ):25.70	FALSE
Q(+0.98)GLLPVLESFK	36.83	1230.69	11	2.7	616.354	2	27.3902	48400	416000	7163	20210526_HS_Frac4-1.raw	1	F8W696|F8W696_HUMAN;P02647|APOA1_HUMAN	Deamidation (NQ)		FALSE
Q(+0.98)N(+0.98)C(+57.02)ELFEQLGEYK	41.88	1658.71	13	1.8	830.369	2	22.9786	19600000	97500000	5803	20210526_HS_Frac4-1.raw	2	A0A0C4DGB6|A0A0C4DGB6_HUMAN;A0A087WWT3|A0A087WWT3_HUMAN;P02768|ALBU_HUMAN;C9JKR2|C9JKR2_HUMAN;D6RHD5|D6RHD5_HUMAN;B7WNR0|B7WNR0_HUMAN;H0YA55|H0YA55_HUMAN	Deamidation (NQ); Deamidation (NQ); Carbamidomethylation	Q1:Deamidation (NQ):50.34;N2:Deamidation (NQ):53.33;C3:Carbamidomethylation:1000.00	FALSE
Q(+0.98)NC(+57.02)E(+21.98)LFEQLGEYK	35.64	1679.71	13	7	840.871	2	24.8167	802000	880000	6480	20210526_HS_Frac3-1.raw	2	A0A0C4DGB6|A0A0C4DGB6_HUMAN;A0A087WWT3|A0A087WWT3_HUMAN;P02768|ALBU_HUMAN;C9JKR2|C9JKR2_HUMAN;D6RHD5|D6RHD5_HUMAN;B7WNR0|B7WNR0_HUMAN;H0YA55|H0YA55_HUMAN	Deamidation (NQ); Carbamidomethylation; Sodium adduct	Q1:Deamidation (NQ):0.00;C3:Carbamidomethylation:1000.00;E4:Sodium adduct:38.16	FALSE
Q(+0.98)NC(+57.02)ELFE(+21.98)QLGEYK	34.22	1679.71	13	-3.2	840.863	2	26.8361	1260000	1240000	6945	20210526_HS_Frac4-1.raw	2	A0A0C4DGB6|A0A0C4DGB6_HUMAN;A0A087WWT3|A0A087WWT3_HUMAN;P02768|ALBU_HUMAN;C9JKR2|C9JKR2_HUMAN;D6RHD5|D6RHD5_HUMAN;B7WNR0|B7WNR0_HUMAN;H0YA55|H0YA55_HUMAN	Deamidation (NQ); Carbamidomethylation; Sodium adduct	Q1:Deamidation (NQ):0.00;C3:Carbamidomethylation:1000.00;E7:Sodium adduct:13.03	FALSE
Q(+0.98)NC(+57.02)ELFEQLGEYK	51.76	1657.73	13	-8.4	829.865	2	23.9104	3420000	26100000	4374	20210526_HS_Frac5-1.raw	10	A0A0C4DGB6|A0A0C4DGB6_HUMAN;A0A087WWT3|A0A087WWT3_HUMAN;P02768|ALBU_HUMAN;C9JKR2|C9JKR2_HUMAN;D6RHD5|D6RHD5_HUMAN;B7WNR0|B7WNR0_HUMAN;H0YA55|H0YA55_HUMAN	Deamidation (NQ); Carbamidomethylation	Q1:Deamidation (NQ):0.00;C3:Carbamidomethylation:1000.00	FALSE
Q(+0.98)TALVELVK	29.37	1000.58	9	1.5	501.3	2	19.3829	46700	1590000	4369	20210526_HS_Frac4-1.raw	2	A0A0C4DGB6|A0A0C4DGB6_HUMAN;A0A087WWT3|A0A087WWT3_HUMAN;P02768|ALBU_HUMAN;C9JKR2|C9JKR2_HUMAN;D6RHD5|D6RHD5_HUMAN;B7WNR0|B7WNR0_HUMAN;H0YA55|H0YA55_HUMAN	Deamidation (NQ)		FALSE
Q(-17.03)APGQELGWM(+15.99)GR	37.21	1327.6	12	2.1	664.81	2	18.03	601000	7380000	3896	20210526_HS_Frac4-3.raw	3		Pyro-glu from Q; Oxidation (M)		FALSE
Q(-17.03)AVD(+21.98)TAVDGVFIR	58.2	1394.68	13	-1.2	698.349	2	22.6336	1360000	18500000	5576	20210526_HS_Frac4-1.raw	3	P19827|ITIH1_HUMAN;F8WAS2|F8WAS2_HUMAN	Pyro-glu from Q; Sodium adduct	Q1:Pyro-glu from Q:1000.00;D4:Sodium adduct:19.46	FALSE
Q(-17.03)AVDTAVDGVFIR	68.07	1372.7	13	-5	687.356	2	22.5505	3870000	48400000	5556	20210526_HS_Frac4-3.raw	9	P19827|ITIH1_HUMAN;F8WAS2|F8WAS2_HUMAN	Pyro-glu from Q		FALSE
Q(-17.03)DPPSVVVTSHQAPGEK	67.92	1757.86	17	0.4	879.94	2	16.095	4470000	34500000	3276	20210526_HS_Frac4-1.raw	10	P25311|ZA2G_HUMAN	Pyro-glu from Q		FALSE
Q(-17.03)E(+21.98)PERNEC(+57.02)FLQ(+0.98)HKDDNPNLPR	48.61	2641.16	21	-7.3	881.391	3	18.4022	51600	751000	4584	20210526_HS_Frac2-3.raw	1	A0A0C4DGB6|A0A0C4DGB6_HUMAN;A0A087WWT3|A0A087WWT3_HUMAN;P02768|ALBU_HUMAN;H7C013|H7C013_HUMAN	Pyro-glu from Q; Sodium adduct; Carbamidomethylation; Deamidation (NQ)	Q1:Pyro-glu from Q:1000.00;E2:Sodium adduct:0.00;C8:Carbamidomethylation:1000.00;Q11:Deamidation (NQ):0.00	FALSE
Q(-17.03)E(+21.98)PERNEC(+57.02)FLQHKDDNPNLPR	48.1	2640.18	21	3	881.072	3	17.4307	76500	1320000	4228	20210526_HS_Frac2-3.raw	1	A0A0C4DGB6|A0A0C4DGB6_HUMAN;A0A087WWT3|A0A087WWT3_HUMAN;P02768|ALBU_HUMAN;H7C013|H7C013_HUMAN	Pyro-glu from Q; Sodium adduct; Carbamidomethylation	Q1:Pyro-glu from Q:1000.00;E2:Sodium adduct:0.00;C8:Carbamidomethylation:1000.00	FALSE
Q(-17.03)E(+21.98)PSQGTTTFAVTSILR	46.99	1839.9	17	2.8	920.962	2	24.605	6380000	67400000	6405	20210526_HS_Frac3-1.raw	8	P01876|IGHA1_HUMAN;A0A286YEY1|A0A286YEY1_HUMAN	Pyro-glu from Q; Sodium adduct	Q1:Pyro-glu from Q:1000.00;E2:Sodium adduct:87.32	FALSE
Q(-17.03)E(+21.98)PSQGTTTYAVTSILR	38.76	1855.89	17	1.6	928.959	2	22.7138	195000	2010000	5670	20210526_HS_Frac4-2.raw	1		Pyro-glu from Q; Sodium adduct	Q1:Pyro-glu from Q:1000.00;E2:Sodium adduct:66.48	FALSE
Q(-17.03)EDDLANINQWVK	62.97	1554.73	13	2.8	778.378	2	23.7621	285000	2150000	5999	20210526_HS_Frac4-3.raw	1	A0A0G2JPA8|A0A0G2JPA8_HUMAN;P08697|A2AP_HUMAN	Pyro-glu from Q		FALSE
Q(-17.03)ELSE(+21.98)AEQATR	39.41	1265.55	11	2	633.786	2	11.3321	4370000	5490000	2245	20210526_HS_Frac4-2.raw	2	P01024|CO3_HUMAN	Pyro-glu from Q; Sodium adduct	Q1:Pyro-glu from Q:1000.00;E5:Sodium adduct:12.33	FALSE
Q(-17.03)ELSEAEQATR	49.55	1243.57	11	-0.5	622.793	2	13.5404	1810000	3990000	2835	20210526_HS_Frac4-1.raw	6	P01024|CO3_HUMAN	Pyro-glu from Q		FALSE
Q(-17.03)EPERN(+0.98)EC(+57.02)FLQHK	60.64	1697.75	13	5.1	566.928	3	12.8246	46300000	128000000	2880	20210526_HS_Frac2-2.raw	13	A0A0C4DGB6|A0A0C4DGB6_HUMAN;A0A087WWT3|A0A087WWT3_HUMAN;P02768|ALBU_HUMAN;H7C013|H7C013_HUMAN	Pyro-glu from Q; Deamidation (NQ); Carbamidomethylation	Q1:Pyro-glu from Q:1000.00;N6:Deamidation (NQ):90.99;C8:Carbamidomethylation:1000.00	FALSE
Q(-17.03)EPERN(+0.98)EC(+57.02)FLQHKDDNPNLPR	56.86	2619.18	21	4.6	655.807	4	17.8129	1920000	17900000	4008	20210526_HS_Frac3-2.raw	3	A0A0C4DGB6|A0A0C4DGB6_HUMAN;A0A087WWT3|A0A087WWT3_HUMAN;P02768|ALBU_HUMAN;H7C013|H7C013_HUMAN	Pyro-glu from Q; Deamidation (NQ); Carbamidomethylation	Q1:Pyro-glu from Q:1000.00;N6:Deamidation (NQ):35.03;C8:Carbamidomethylation:1000.00	FALSE
Q(-17.03)EPERNE(+21.98)C(+57.02)FLQHK	44.82	1718.74	13	-0.8	573.924	3	12.749	538000	1860000	2819	20210526_HS_Frac2-3.raw	1	A0A0C4DGB6|A0A0C4DGB6_HUMAN;A0A087WWT3|A0A087WWT3_HUMAN;P02768|ALBU_HUMAN;H7C013|H7C013_HUMAN	Pyro-glu from Q; Sodium adduct; Carbamidomethylation	Q1:Pyro-glu from Q:1000.00;E7:Sodium adduct:14.84;C8:Carbamidomethylation:1000.00	FALSE
Q(-17.03)EPERNEC(+57.02)FLQ(+0.98)HKDDNPNLPR	65.25	2619.18	21	-5	655.801	4	17.705	1580000	21300000	4302	20210526_HS_Frac2-3.raw	2	A0A0C4DGB6|A0A0C4DGB6_HUMAN;A0A087WWT3|A0A087WWT3_HUMAN;P02768|ALBU_HUMAN;H7C013|H7C013_HUMAN	Pyro-glu from Q; Carbamidomethylation; Deamidation (NQ)	Q1:Pyro-glu from Q:1000.00;C8:Carbamidomethylation:1000.00;Q11:Deamidation (NQ):10.19	FALSE
Q(-17.03)EPERNEC(+57.02)FLQHK	65.01	1696.76	13	-8.7	566.592	3	12.7846	383000000	1670000000	2835	20210526_HS_Frac2-3.raw	124	A0A0C4DGB6|A0A0C4DGB6_HUMAN;A0A087WWT3|A0A087WWT3_HUMAN;P02768|ALBU_HUMAN;H7C013|H7C013_HUMAN	Pyro-glu from Q; Carbamidomethylation	C8:Carbamidomethylation:1000.00	FALSE
Q(-17.03)EPERNEC(+57.02)FLQHKDDNPNLPR	97.01	2618.19	21	-5.2	655.554	4	17.5416	44800000	444000000	4234	20210526_HS_Frac2-1.raw	30	A0A0C4DGB6|A0A0C4DGB6_HUMAN;A0A087WWT3|A0A087WWT3_HUMAN;P02768|ALBU_HUMAN;H7C013|H7C013_HUMAN	Pyro-glu from Q; Carbamidomethylation	C8:Carbamidomethylation:1000.00	FALSE
Q(-17.03)EPSQGTTTFAVTSILR	81.1	1817.92	17	-4.6	909.964	2	24.6747	40000000	349000000	6322	20210526_HS_Frac4-1.raw	21	P01876|IGHA1_HUMAN;A0A286YEY1|A0A286YEY1_HUMAN	Pyro-glu from Q		FALSE
Q(-17.03)EPSQGTTTYAVTSILR	46.28	1833.91	17	-6.2	917.96	2	21.1802	29200000	73700000	6344	20210526_HS_Frac4-1.raw	5		Pyro-glu from Q		FALSE
Q(-17.03)EYE(+21.98)QLIAK	39.33	1125.53	9	1.1	563.776	2	18.3832	739000	6390000	4002	20210526_HS_Frac4-1.raw	3	K7EQQ3|K7EQQ3_HUMAN;P35527|K1C9_HUMAN	Pyro-glu from Q; Sodium adduct	Q1:Pyro-glu from Q:1000.00;E4:Sodium adduct:43.57	FALSE
Q(-17.03)EYEQLIAK	63.63	1103.55	9	-0.1	552.784	2	18.3832	1070000	8420000	3989	20210526_HS_Frac4-1.raw	3	K7EQQ3|K7EQQ3_HUMAN;P35527|K1C9_HUMAN	Pyro-glu from Q		FALSE
Q(-17.03)FPILLDFK	60.72	1102.61	9	3.5	552.315	2	30.2844	524000	4010000	7830	20210526_HS_Frac4-2.raw	3	P05546|HEP2_HUMAN	Pyro-glu from Q		FALSE
Q(-17.03)FSFPLSSE(+21.98)PFQGSYK	58.93	1852.83	16	3.1	927.428	2	26.958	2550000	20500000	7072	20210526_HS_Frac4-2.raw	6	P01023|A2MG_HUMAN	Pyro-glu from Q; Sodium adduct	Q1:Pyro-glu from Q:1000.00;E9:Sodium adduct:33.89	FALSE
Q(-17.03)FSFPLSSEPFQGSYK	66.92	1830.85	16	0.8	916.435	2	27.0683	14900000	100000000	7047	20210526_HS_Frac4-1.raw	9	P01023|A2MG_HUMAN	Pyro-glu from Q		FALSE
Q(-17.03)FSSSYLSR	52.44	1056.49	9	2.5	529.254	2	18.0925	74400	1040000	3903	20210526_HS_Frac4-1.raw	2	P35527|K1C9_HUMAN	Pyro-glu from Q		FALSE
Q(-17.03)GHN(+0.98)SVFLIK	44.87	1125.58	10	3.5	563.802	2	19.4273	2850000	24500000	4388	20210526_HS_Frac4-1.raw	5	P02790|HEMO_HUMAN;Q9BS19|Q9BS19_HUMAN	Pyro-glu from Q; Deamidation (NQ)		FALSE
Q(-17.03)GHNSVFLIK	57.25	1124.6	10	4.3	563.311	2	18.9789	24500000	213000000	4239	20210526_HS_Frac4-3.raw	11	P02790|HEMO_HUMAN;Q9BS19|Q9BS19_HUMAN	Pyro-glu from Q		FALSE
Q(-17.03)GIPFFGQVR	55.22	1130.59	10	3.5	566.305	2	25.2235	9120000	128000000	6497	20210526_HS_Frac4-1.raw	24	P01023|A2MG_HUMAN	Pyro-glu from Q		FALSE
Q(-17.03)GLLPVLE(+21.98)SFK	26.03	1234.66	11	-0.3	618.338	2	29.1039	1550000	10900000	7528	20210526_HS_Frac4-1.raw	1	F8W696|F8W696_HUMAN;P02647|APOA1_HUMAN	Pyro-glu from Q; Sodium adduct	Q1:Pyro-glu from Q:1000.00;E8:Sodium adduct:19.05	FALSE
Q(-17.03)GLLPVLESFK	58.07	1212.68	11	0	607.347	2	31.6339	8120000	64600000	7669	20210526_HS_Frac4-1.raw	23	F8W696|F8W696_HUMAN;P02647|APOA1_HUMAN	Pyro-glu from Q		FALSE
Q(-17.03)GPVNLLSD(+21.98)PE(+21.98)QGVEVTGQYER	56.49	2441.11	22	4.9	814.714	3	24.1885	33300	470000	4368	20210526_HS_Frac5-2.raw	1	Q14624|ITIH4_HUMAN;B7ZKJ8|B7ZKJ8_HUMAN	Pyro-glu from Q; Sodium adduct; Sodium adduct	Q1:Pyro-glu from Q:1000.00;D9:Sodium adduct:36.87;E11:Sodium adduct:19.86	FALSE
Q(-17.03)GPVNLLSD(+21.98)PEQGVEVTGQYER	69.05	2419.13	22	4.9	807.387	3	24.1957	785000	8100000	4428	20210526_HS_Frac5-1.raw	4	Q14624|ITIH4_HUMAN;B7ZKJ8|B7ZKJ8_HUMAN	Pyro-glu from Q; Sodium adduct	Q1:Pyro-glu from Q:1000.00;D9:Sodium adduct:9.40	FALSE
Q(-17.03)GPVNLLSDPEQGVEVTGQYER	76.29	2397.14	22	4.4	800.059	3	24.1978	3910000	36500000	4384	20210526_HS_Frac5-3.raw	7	Q14624|ITIH4_HUMAN;B7ZKJ8|B7ZKJ8_HUMAN	Pyro-glu from Q		FALSE
Q(-17.03)GSFQGGFR	42.32	965.436	9	0.8	483.727	2	13.1298	2410000	3730000	2583	20210526_HS_Frac4-1.raw	5		Pyro-glu from Q		FALSE
Q(-17.03)GVD(+21.98)ADIN(+0.98)GLR	45.28	1162.52	11	3.3	582.273	2	16.3283	566000	3460000	3363	20210526_HS_Frac4-3.raw	3	K7EQQ3|K7EQQ3_HUMAN;P35527|K1C9_HUMAN	Pyro-glu from Q; Sodium adduct; Deamidation (NQ)	Q1:Pyro-glu from Q:1000.00;D4:Sodium adduct:32.28;N8:Deamidation (NQ):1000.00	FALSE
Q(-17.03)GVD(+21.98)ADINGLR	46.22	1161.54	11	1.7	581.78	2	17.634	363000	4420000	3789	20210526_HS_Frac4-2.raw	3	K7EQQ3|K7EQQ3_HUMAN;P35527|K1C9_HUMAN	Pyro-glu from Q; Sodium adduct	Q1:Pyro-glu from Q:1000.00;D4:Sodium adduct:54.01	FALSE
Q(-17.03)GVDADIN(+0.98)GLR	47.44	1140.54	11	3	571.282	2	16.3283	383000	2570000	3372	20210526_HS_Frac4-3.raw	2	K7EQQ3|K7EQQ3_HUMAN;P35527|K1C9_HUMAN	Pyro-glu from Q; Deamidation (NQ)		FALSE
Q(-17.03)GVDADINGLR	59.84	1139.56	11	1.7	570.789	2	17.5536	493000	5620000	3714	20210526_HS_Frac4-1.raw	3	K7EQQ3|K7EQQ3_HUMAN;P35527|K1C9_HUMAN	Pyro-glu from Q		FALSE
Q(-17.03)GYFVE(+21.98)AQPK	46.26	1170.53	10	2.7	586.277	2	17.2044	1750000	9310000	3649	20210526_HS_Frac4-2.raw	3	P02743|SAMP_HUMAN	Pyro-glu from Q; Sodium adduct	Q1:Pyro-glu from Q:1000.00;E6:Sodium adduct:48.28	FALSE
Q(-17.03)GYFVEAQPK	52.4	1148.55	10	2.6	575.286	2	17.0395	2180000	12300000	3541	20210526_HS_Frac4-1.raw	3	P02743|SAMP_HUMAN	Pyro-glu from Q		FALSE
Q(-17.03)HIEAIDVR	51.4	1062.55	9	0.4	532.282	2	16.449	5100000	17600000	3558	20210526_HS_Frac3-3.raw	3	P04114|APOB_HUMAN	Pyro-glu from Q		FALSE
Q(-17.03)ID(+21.98)DIDVR	36.73	977.443	8	-0.1	489.731	2	17.0929	841000	4740000	3557	20210526_HS_Frac4-1.raw	2	P04114|APOB_HUMAN	Pyro-glu from Q; Sodium adduct	Q1:Pyro-glu from Q:1000.00;D3:Sodium adduct:30.46	FALSE
Q(-17.03)IDDIDVR	44.11	955.461	8	0.4	478.74	2	17.0929	2960000	22500000	3584	20210526_HS_Frac4-1.raw	6	P04114|APOB_HUMAN	Pyro-glu from Q		FALSE
Q(-17.03)INDYVEK	47.66	990.466	8	-0.1	496.242	2	12.0886	11200000	42200000	3053	20210526_HS_Frac4-1.raw	25		Pyro-glu from Q		FALSE
Q(-17.03)ISNLQQSISDAEQR	68.77	1698.82	15	2.4	850.421	2	20.8678	2760000	42900000	4913	20210526_HS_Frac4-1.raw	10	#CONTAM#cont|000132|;#CONTAM#cont|000135|;#CONTAM#cont|000134|;P04264|K2C1_HUMAN	Pyro-glu from Q		FALSE
Q(-17.03)KPDGVFQEDAPVIHQEM(+15.99)IGGLR	71.42	2562.25	23	0.4	855.095	3	22.355	17400000	162000000	6081	20210526_HS_Frac2-1.raw	7	P01024|CO3_HUMAN	Pyro-glu from Q; Oxidation (M)		FALSE
Q(-17.03)KWEAEPVYVQR	63.47	1514.75	12	5.3	758.39	2	18.8958	573000	6030000	4390	20210526_HS_Frac3-3.raw	5	C9JEV0|C9JEV0_HUMAN;P25311|ZA2G_HUMAN	Pyro-glu from Q		FALSE
Q(-17.03)LGAGSIE(+21.98)EC(+57.02)AAK	46.35	1337.59	13	1.4	669.806	2	16.6888	199000	2200000	3455	20210526_HS_Frac4-1.raw	3	A6PVI2|A6PVI2_HUMAN;Q5TEH5|Q5TEH5_HUMAN;P00747|PLMN_HUMAN	Pyro-glu from Q; Sodium adduct; Carbamidomethylation	Q1:Pyro-glu from Q:1000.00;E8:Sodium adduct:0.00;C10:Carbamidomethylation:1000.00	FALSE
Q(-17.03)LGAGSIEEC(+57.02)AAK	59.09	1315.61	13	-1.8	658.812	2	16.6824	309000	2990000	3459	20210526_HS_Frac4-1.raw	3	A6PVI2|A6PVI2_HUMAN;Q5TEH5|Q5TEH5_HUMAN;P00747|PLMN_HUMAN	Pyro-glu from Q; Carbamidomethylation	C10:Carbamidomethylation:1000.00	FALSE
Q(-17.03)LN(+0.98)EINYEDHK	50.54	1385.61	11	0.6	693.815	2	15.8807	355000	2400000	3386	20210526_HS_Frac3-3.raw	4	E7ETN3|E7ETN3_HUMAN;P00751|CFAB_HUMAN;A0A0G2JH38|A0A0G2JH38_HUMAN;B4E1Z4|B4E1Z4_HUMAN	Pyro-glu from Q; Deamidation (NQ)	Q1:Pyro-glu from Q:1000.00;N3:Deamidation (NQ):51.69	FALSE
Q(-17.03)LNEINYEDHK	51.59	1384.63	11	2.9	693.325	2	16.4421	6150000	43000000	3424	20210526_HS_Frac4-2.raw	16	E7ETN3|E7ETN3_HUMAN;P00751|CFAB_HUMAN;A0A0G2JH38|A0A0G2JH38_HUMAN;B4E1Z4|B4E1Z4_HUMAN	Pyro-glu from Q		FALSE
Q(-17.03)LYGDTGVLGR	54.8	1160.58	11	5.2	581.304	2	19.6001	43900	1450000	4516	20210526_HS_Frac4-2.raw	3	P07360|CO8G_HUMAN	Pyro-glu from Q		FALSE
Q(-17.03)N(+0.98)C(+57.02)ELFE(+21.98)QLGEYK	38.63	1662.68	13	4.3	832.353	2	23.8909	2580000	18900000	4458	20210526_HS_Frac5-2.raw	1	A0A0C4DGB6|A0A0C4DGB6_HUMAN;A0A087WWT3|A0A087WWT3_HUMAN;P02768|ALBU_HUMAN;C9JKR2|C9JKR2_HUMAN;D6RHD5|D6RHD5_HUMAN;B7WNR0|B7WNR0_HUMAN;H0YA55|H0YA55_HUMAN	Pyro-glu from Q; Deamidation (NQ); Carbamidomethylation; Sodium adduct	Q1:Pyro-glu from Q:1000.00;N2:Deamidation (NQ):27.70;C3:Carbamidomethylation:1000.00;E7:Sodium adduct:25.70	FALSE
Q(-17.03)N(+0.98)C(+57.02)ELFEQLGEYK	79.54	1640.7	13	7	821.364	2	23.7257	71900000	503000000	4350	20210526_HS_Frac5-1.raw	8	A0A0C4DGB6|A0A0C4DGB6_HUMAN;A0A087WWT3|A0A087WWT3_HUMAN;P02768|ALBU_HUMAN;C9JKR2|C9JKR2_HUMAN;D6RHD5|D6RHD5_HUMAN;B7WNR0|B7WNR0_HUMAN;H0YA55|H0YA55_HUMAN	Pyro-glu from Q; Deamidation (NQ); Carbamidomethylation	Q1:Pyro-glu from Q:1000.00;N2:Deamidation (NQ):109.28;C3:Carbamidomethylation:1000.00	FALSE
Q(-17.03)NC(+57.02)E(+21.98)LFE(+21.98)QLGEYK	36.33	1683.68	13	-0.4	842.851	2	23.7229	437000	6720000	5982	20210526_HS_Frac4-1.raw	6	A0A0C4DGB6|A0A0C4DGB6_HUMAN;A0A087WWT3|A0A087WWT3_HUMAN;P02768|ALBU_HUMAN;C9JKR2|C9JKR2_HUMAN;D6RHD5|D6RHD5_HUMAN;B7WNR0|B7WNR0_HUMAN;H0YA55|H0YA55_HUMAN	Pyro-glu from Q; Carbamidomethylation; Sodium adduct; Sodium adduct	Q1:Pyro-glu from Q:1000.00;C3:Carbamidomethylation:1000.00;E4:Sodium adduct:20.02;E7:Sodium adduct:28.70	FALSE
Q(-17.03)NC(+57.02)E(+21.98)LFEQ(+0.98)LGEYK	34.99	1662.68	13	8.9	555.24	3	23.6731	326000	506000	4291	20210526_HS_Frac5-1.raw	4	A0A0C4DGB6|A0A0C4DGB6_HUMAN;A0A087WWT3|A0A087WWT3_HUMAN;P02768|ALBU_HUMAN;C9JKR2|C9JKR2_HUMAN;D6RHD5|D6RHD5_HUMAN;B7WNR0|B7WNR0_HUMAN;H0YA55|H0YA55_HUMAN	Pyro-glu from Q; Carbamidomethylation; Sodium adduct; Deamidation (NQ)	Q1:Pyro-glu from Q:1000.00;C3:Carbamidomethylation:1000.00;E4:Sodium adduct:9.42;Q8:Deamidation (NQ):41.57	FALSE
Q(-17.03)NC(+57.02)E(+21.98)LFEQLGEYK	61.74	1661.7	13	4.1	831.861	2	23.6861	21900000	148000000	4220	20210526_HS_Frac5-2.raw	18	A0A0C4DGB6|A0A0C4DGB6_HUMAN;A0A087WWT3|A0A087WWT3_HUMAN;P02768|ALBU_HUMAN;C9JKR2|C9JKR2_HUMAN;D6RHD5|D6RHD5_HUMAN;B7WNR0|B7WNR0_HUMAN;H0YA55|H0YA55_HUMAN	Pyro-glu from Q; Carbamidomethylation; Sodium adduct	Q1:Pyro-glu from Q:1000.00;C3:Carbamidomethylation:1000.00;E4:Sodium adduct:0.00	FALSE
Q(-17.03)NC(+57.02)ELFE(+21.98)Q(+0.98)LGEYK	37.19	1662.68	13	5.5	832.357	2	24.1958	105000	908000	6328	20210526_HS_Frac3-3.raw	1	A0A0C4DGB6|A0A0C4DGB6_HUMAN;A0A087WWT3|A0A087WWT3_HUMAN;P02768|ALBU_HUMAN;C9JKR2|C9JKR2_HUMAN;D6RHD5|D6RHD5_HUMAN;B7WNR0|B7WNR0_HUMAN;H0YA55|H0YA55_HUMAN	Pyro-glu from Q; Carbamidomethylation; Sodium adduct; Deamidation (NQ)	Q1:Pyro-glu from Q:1000.00;C3:Carbamidomethylation:1000.00;E7:Sodium adduct:12.33;Q8:Deamidation (NQ):34.90	FALSE
Q(-17.03)NC(+57.02)ELFE(+21.98)QLGEYK	80.18	1661.7	13	-1.1	831.86	2	23.7229	31900000	314000000	5965	20210526_HS_Frac4-1.raw	29	A0A0C4DGB6|A0A0C4DGB6_HUMAN;A0A087WWT3|A0A087WWT3_HUMAN;P02768|ALBU_HUMAN;C9JKR2|C9JKR2_HUMAN;D6RHD5|D6RHD5_HUMAN;B7WNR0|B7WNR0_HUMAN;H0YA55|H0YA55_HUMAN	Pyro-glu from Q; Carbamidomethylation; Sodium adduct	Q1:Pyro-glu from Q:1000.00;C3:Carbamidomethylation:1000.00;E7:Sodium adduct:67.82	FALSE
Q(-17.03)NC(+57.02)ELFEQ(+0.98)LGEYK	53.32	1640.7	13	5.8	821.366	2	23.7229	36800000	137000000	6236	20210526_HS_Frac4-1.raw	1	A0A0C4DGB6|A0A0C4DGB6_HUMAN;A0A087WWT3|A0A087WWT3_HUMAN;P02768|ALBU_HUMAN;C9JKR2|C9JKR2_HUMAN;D6RHD5|D6RHD5_HUMAN;B7WNR0|B7WNR0_HUMAN;H0YA55|H0YA55_HUMAN	Pyro-glu from Q; Carbamidomethylation; Deamidation (NQ)	Q1:Pyro-glu from Q:1000.00;C3:Carbamidomethylation:1000.00;Q8:Deamidation (NQ):42.24	FALSE
Q(-17.03)NC(+57.02)ELFEQLGEYK	85.18	1639.72	13	-9.6	820.862	2	23.6176	184000000	2500000000	5933	20210526_HS_Frac4-3.raw	139	A0A0C4DGB6|A0A0C4DGB6_HUMAN;A0A087WWT3|A0A087WWT3_HUMAN;P02768|ALBU_HUMAN;C9JKR2|C9JKR2_HUMAN;D6RHD5|D6RHD5_HUMAN;B7WNR0|B7WNR0_HUMAN;H0YA55|H0YA55_HUMAN	Pyro-glu from Q; Carbamidomethylation	C3:Carbamidomethylation:1000.00	FALSE
Q(-17.03)PQFISR	50.15	857.439	7	0.3	429.729	2	14.1204	334000	818000	2824	20210526_HS_Frac4-1.raw	3	P04004|VTNC_HUMAN	Pyro-glu from Q		FALSE
Q(-17.03)PSSAFAAFVK	73	1134.57	11	-2.4	568.293	2	23.0115	18500000	129000000	5717	20210526_HS_Frac4-1.raw	17	P01024|CO3_HUMAN	Pyro-glu from Q		FALSE
Q(-17.03)PVPGQQM(+15.99)TLK	54.06	1224.62	11	-0.3	613.318	2	12.2966	7360000	18600000	2453	20210526_HS_Frac4-2.raw	6	P01024|CO3_HUMAN	Pyro-glu from Q; Oxidation (M)		FALSE
Q(-17.03)QNAQGGFSSTQD(+21.98)TVVALHALSK	66.17	2391.14	23	3.9	798.058	3	22.4244	1430000	30400000	3980	20210526_HS_Frac5-1.raw	7	P01023|A2MG_HUMAN	Pyro-glu from Q; Sodium adduct	Q1:Pyro-glu from Q:1000.00;D13:Sodium adduct:35.88	FALSE
Q(-17.03)QNAQGGFSSTQDTVVALHALSK	80.62	2369.16	23	-0.5	1185.59	2	22.304	6800000	128000000	5463	20210526_HS_Frac4-3.raw	12	P01023|A2MG_HUMAN	Pyro-glu from Q		FALSE
Q(-17.03)QTHM(+15.99)LDVM(+15.99)QDHFSR	43.1	1886.8	15	2.2	629.946	3	15.1054	3090000	14000000	3399	20210526_HS_Frac2-3.raw	4	H0YLK8|H0YLK8_HUMAN;P10909|CLUS_HUMAN;H0YC35|H0YC35_HUMAN;E7ETB4|E7ETB4_HUMAN;E7ERK6|E7ERK6_HUMAN	Pyro-glu from Q; Oxidation (M); Oxidation (M)		FALSE
Q(-17.03)RQEELC(+57.02)LAR	54.34	1284.62	10	1.9	643.323	2	13.9401	1460000	5840000	3095	20210526_HS_Frac2-3.raw	3	Q5VY30|Q5VY30_HUMAN;P02753|RET4_HUMAN	Pyro-glu from Q; Carbamidomethylation	C7:Carbamidomethylation:1000.00	FALSE
Q(-17.03)SED(+21.98)STFYLGER	55.36	1435.59	12	1	718.804	2	18.4965	2710000	15900000	4090	20210526_HS_Frac4-2.raw	3	E9PFZ2|E9PFZ2_HUMAN;H7C5R1|H7C5R1_HUMAN;P00450|CERU_HUMAN	Pyro-glu from Q; Sodium adduct	Q1:Pyro-glu from Q:1000.00;D4:Sodium adduct:17.01	FALSE
Q(-17.03)SEDSTFYLGER	61.98	1413.6	12	0.6	707.813	2	18.4875	4060000	24400000	4020	20210526_HS_Frac4-1.raw	5	E9PFZ2|E9PFZ2_HUMAN;H7C5R1|H7C5R1_HUMAN;P00450|CERU_HUMAN	Pyro-glu from Q		FALSE
Q(-17.03)SFDLSVK	49.11	905.449	8	-0.2	453.734	2	18.7163	1730000	11200000	4130	20210526_HS_Frac4-1.raw	4	P04114|APOB_HUMAN	Pyro-glu from Q		FALSE
Q(-17.03)SLE(+21.98)ASLAETEGR	52.23	1394.63	13	0	698.325	2	18.674	801000	10000000	4167	20210526_HS_Frac4-2.raw	3	#CONTAM#cont|000133|;#CONTAM#cont|000131|;P13645|K1C10_HUMAN;#CONTAM#cont|000129|;#CONTAM#cont|000136|;#CONTAM#cont|000122|;#CONTAM#cont|000130|	Pyro-glu from Q; Sodium adduct	Q1:Pyro-glu from Q:1000.00;E4:Sodium adduct:38.86	FALSE
Q(-17.03)SLEASLAETEGR	69.75	1372.65	13	-4	687.331	2	18.6808	1320000	14200000	4111	20210526_HS_Frac4-1.raw	3	#CONTAM#cont|000133|;#CONTAM#cont|000131|;P13645|K1C10_HUMAN;#CONTAM#cont|000129|;#CONTAM#cont|000136|;#CONTAM#cont|000122|;#CONTAM#cont|000130|	Pyro-glu from Q		FALSE
Q(-17.03)SSSYSFFK	55.45	1062.47	9	2.9	532.244	2	19.3013	498000	3780000	4334	20210526_HS_Frac4-1.raw	3	P04003|C4BPA_HUMAN	Pyro-glu from Q		FALSE
Q(-17.03)SVE(+21.98)ADIN(+0.98)GLR	44.41	1206.55	11	2.5	604.286	2	17.1465	749000	6140000	3631	20210526_HS_Frac4-2.raw	5	#CONTAM#cont|000133|;#CONTAM#cont|000131|;P13645|K1C10_HUMAN;#CONTAM#cont|000129|;#CONTAM#cont|000136|;#CONTAM#cont|000122|;#CONTAM#cont|000130|	Pyro-glu from Q; Sodium adduct; Deamidation (NQ)	Q1:Pyro-glu from Q:1000.00;E4:Sodium adduct:26.31;N8:Deamidation (NQ):1000.00	FALSE
Q(-17.03)SVEADIN(+0.98)GLR	49.12	1184.57	11	3.7	593.295	2	17.1465	925000	8050000	3630	20210526_HS_Frac4-2.raw	4	#CONTAM#cont|000133|;#CONTAM#cont|000131|;P13645|K1C10_HUMAN;#CONTAM#cont|000129|;#CONTAM#cont|000136|;#CONTAM#cont|000122|;#CONTAM#cont|000130|	Pyro-glu from Q; Deamidation (NQ)		FALSE
Q(-17.03)SVEADIN(+0.98)GLRR	46.12	1340.67	12	-1.6	671.343	2	15.9654	568000	4730000	3411	20210526_HS_Frac3-3.raw	2	#CONTAM#cont|000133|;#CONTAM#cont|000131|;P13645|K1C10_HUMAN;#CONTAM#cont|000129|;#CONTAM#cont|000136|;#CONTAM#cont|000122|;#CONTAM#cont|000130|	Pyro-glu from Q; Deamidation (NQ)		FALSE
Q(-17.03)SVEADINGLR	55.08	1183.58	11	4.1	592.804	2	18.7795	634000	6880000	4217	20210526_HS_Frac4-2.raw	3	#CONTAM#cont|000133|;#CONTAM#cont|000131|;P13645|K1C10_HUMAN;#CONTAM#cont|000129|;#CONTAM#cont|000136|;#CONTAM#cont|000122|;#CONTAM#cont|000130|	Pyro-glu from Q		FALSE
Q(-17.03)TALVE(+21.98)LVK	43.59	1004.55	9	-0.5	503.285	2	22.604	65400000	502000000	5572	20210526_HS_Frac4-1.raw	47	A0A0C4DGB6|A0A0C4DGB6_HUMAN;A0A087WWT3|A0A087WWT3_HUMAN;P02768|ALBU_HUMAN;C9JKR2|C9JKR2_HUMAN;D6RHD5|D6RHD5_HUMAN;B7WNR0|B7WNR0_HUMAN;H0YA55|H0YA55_HUMAN	Pyro-glu from Q; Sodium adduct	Q1:Pyro-glu from Q:1000.00;E6:Sodium adduct:48.45	FALSE
Q(-17.03)TALVELVK	53.2	982.57	9	-1	492.294	2	22.2155	138000000	1680000000	6045	20210526_HS_Frac2-3.raw	92	A0A0C4DGB6|A0A0C4DGB6_HUMAN;A0A087WWT3|A0A087WWT3_HUMAN;P02768|ALBU_HUMAN;C9JKR2|C9JKR2_HUMAN;D6RHD5|D6RHD5_HUMAN;B7WNR0|B7WNR0_HUMAN;H0YA55|H0YA55_HUMAN	Pyro-glu from Q		FALSE
Q(-17.03)THQPPAPNSLIR	59.64	1440.75	13	2.3	721.385	2	16.5358	2270000	24000000	3891	20210526_HS_Frac2-1.raw	7	P02747|C1QC_HUMAN	Pyro-glu from Q		FALSE
Q(-17.03)TQVSVLPEGGETPLFK	67.64	1811.93	17	3.1	906.979	2	24.316	1990000	18400000	6243	20210526_HS_Frac4-2.raw	7	A0A0A0MS51|A0A0A0MS51_HUMAN;P06396|GELS_HUMAN;A0A0A0MT01|A0A0A0MT01_HUMAN	Pyro-glu from Q		FALSE
Q(-17.03)TVSWAVTPK	67.19	1098.57	10	3.4	550.297	2	19.3829	6460000	101000000	4350	20210526_HS_Frac4-1.raw	7	P01023|A2MG_HUMAN	Pyro-glu from Q		FALSE
Q(-17.03)TVSWAVTPK(+21.98)	35.36	1120.55	10	1.7	561.287	2	19.3829	4030000	38000000	4358	20210526_HS_Frac4-1.raw	3	P01023|A2MG_HUMAN	Pyro-glu from Q; Sodium adduct		FALSE
Q(-17.03)VGSGVTTD(+21.98)QVQAEAK	49.06	1621.76	16	1.2	811.889	2	14.3279	5490000	42100000	2981	20210526_HS_Frac4-1.raw	9	P01871|IGHM_HUMAN	Pyro-glu from Q; Sodium adduct	Q1:Pyro-glu from Q:1000.00;D9:Sodium adduct:61.30	FALSE
Q(-17.03)VGSGVTTDQVQAEAK	70.31	1599.77	16	0.9	800.898	2	14.3346	12600000	107000000	2975	20210526_HS_Frac4-1.raw	12	P01871|IGHM_HUMAN	Pyro-glu from Q		FALSE
Q(-17.03)VLDNLTM(+15.99)EK	54.3	1188.57	10	2.2	595.295	2	18.0275	650000	8510000	3895	20210526_HS_Frac4-3.raw	3	K7EQQ3|K7EQQ3_HUMAN;P35527|K1C9_HUMAN	Pyro-glu from Q; Oxidation (M)		FALSE
Q(-17.03)VVAGLN(+0.98)FR	44.75	986.519	9	1.3	494.269	2	20.6282	130000	806000	4849	20210526_HS_Frac4-1.raw	2	P01042|KNG1_HUMAN	Pyro-glu from Q; Deamidation (NQ)		FALSE
Q(-17.03)VVAGLNFR	53.88	985.534	9	-1.2	493.776	2	21.3129	2430000	25800000	5102	20210526_HS_Frac4-3.raw	8	P01042|KNG1_HUMAN	Pyro-glu from Q		FALSE
Q(-17.03)YYE(+21.98)GSEIVVAGR	55.56	1474.67	13	2.8	738.348	2	19.4627	330000	2840000	4470	20210526_HS_Frac4-2.raw	1	P19827|ITIH1_HUMAN;H7C0N0|H7C0N0_HUMAN	Pyro-glu from Q; Sodium adduct	Q1:Pyro-glu from Q:1000.00;E4:Sodium adduct:22.69	FALSE
Q(-17.03)YYEGSEIVVAGR	72.94	1452.69	13	3.1	727.356	2	19.5287	2020000	18600000	4423	20210526_HS_Frac4-1.raw	9	P19827|ITIH1_HUMAN;H7C0N0|H7C0N0_HUMAN	Pyro-glu from Q		FALSE
QAVDTAVDGVFIR	63.3	1389.73	13	4.7	695.875	2	20.5253	751000	12000000	4969	20210526_HS_Frac3-3.raw	3	P19827|ITIH1_HUMAN;F8WAS2|F8WAS2_HUMAN			FALSE
QEPERNEC(+57.02)FLQHKDDNPNLPR	51.02	2635.22	21	-5.2	879.412	3	17.1926			4112	20210526_HS_Frac2-1.raw	2	A0A0C4DGB6|A0A0C4DGB6_HUMAN;A0A087WWT3|A0A087WWT3_HUMAN;P02768|ALBU_HUMAN;H7C013|H7C013_HUMAN	Carbamidomethylation	C8:Carbamidomethylation:1000.00	FALSE
QEPSQ(+0.98)GTTTFAVTSILR	46.42	1835.93	17	-5	918.969	2	24.9016	336000	950000	6457	20210526_HS_Frac4-3.raw	1	P01876|IGHA1_HUMAN;A0A286YEY1|A0A286YEY1_HUMAN	Deamidation (NQ)	Q5:Deamidation (NQ):0.00	FALSE
QEPSQGTTTFAVTSILR	66.88	1834.94	17	2.8	918.484	2	23.3496	22600000	181000000	5993	20210526_HS_Frac3-3.raw	19	P01876|IGHA1_HUMAN;A0A286YEY1|A0A286YEY1_HUMAN			FALSE
QEPSQGTTTYAVTSILR	49.78	1850.94	17	1.2	926.48	2	21.3978	132000	2270000	5290	20210526_HS_Frac3-2.raw	3				FALSE
QFPILLDFK	50.9	1119.63	9	4	560.828	2	27.0484	437000	4640000	7684	20210526_HS_Frac2-1.raw	3	P05546|HEP2_HUMAN			FALSE
QFSFPLSSEPFQGSYK	64.09	1847.87	16	1.6	924.948	2	25.0137	4960000	44300000	6511	20210526_HS_Frac3-2.raw	11	P01023|A2MG_HUMAN			FALSE
QGIPFFGQVR	52.62	1147.61	10	3	574.818	2	25.3333	1880000	9970000	6522	20210526_HS_Frac4-1.raw	6	P01023|A2MG_HUMAN			FALSE
QGLLPVLESFK	66.06	1229.7	11	0.5	615.861	2	26.0608	8400000	64600000	6813	20210526_HS_Frac3-3.raw	10	F8W696|F8W696_HUMAN;P02647|APOA1_HUMAN			FALSE
QGPVNLLSDPEQ(+0.98)GVEVTGQYER	36.81	2415.16	22	4.3	806.066	3	22.5643	95500	1010000	5573	20210526_HS_Frac4-1.raw	1	Q14624|ITIH4_HUMAN;B7ZKJ8|B7ZKJ8_HUMAN	Deamidation (NQ)	Q12:Deamidation (NQ):12.53	FALSE
QGPVNLLSDPEQGVEVTGQYER	39.74	2414.17	22	-0.7	805.733	3	22.6065	286000	3280000	5573	20210526_HS_Frac4-1.raw	5	Q14624|ITIH4_HUMAN;B7ZKJ8|B7ZKJ8_HUMAN			FALSE
QGYFVEAQPK	55	1165.58	10	2.2	583.799	2	12.3279	638000	1930000	2729	20210526_HS_Frac2-2.raw	3	P02743|SAMP_HUMAN			FALSE
QIQVSWLR	42.03	1028.58	8	2.2	515.299	2	20.967	3140000	28600000	5560	20210526_HS_Frac2-2.raw	5	P01871|IGHM_HUMAN			FALSE
QISNLQQSISDAEQR	56.87	1715.84	15	-0.1	572.957	3	17.6851	149000	2620000	3978	20210526_HS_Frac3-3.raw	4	#CONTAM#cont|000132|;#CONTAM#cont|000135|;#CONTAM#cont|000134|;P04264|K2C1_HUMAN			FALSE
QN(+0.98)C(+57.02)ELFEQLGEYK	59.58	1657.73	13	0.8	829.876	2	22.2689	3220000	20300000	5429	20210526_HS_Frac4-1.raw	6	A0A0C4DGB6|A0A0C4DGB6_HUMAN;A0A087WWT3|A0A087WWT3_HUMAN;P02768|ALBU_HUMAN;C9JKR2|C9JKR2_HUMAN;D6RHD5|D6RHD5_HUMAN;B7WNR0|B7WNR0_HUMAN;H0YA55|H0YA55_HUMAN	Deamidation (NQ); Carbamidomethylation	N2:Deamidation (NQ):0.00;C3:Carbamidomethylation:1000.00	FALSE
QNC(+57.02)E(+21.98)LFEQLGEYK	54.6	1678.73	13	0.7	560.585	3	21.8811	3240000	29600000	5467	20210526_HS_Frac3-3.raw	5	A0A0C4DGB6|A0A0C4DGB6_HUMAN;A0A087WWT3|A0A087WWT3_HUMAN;P02768|ALBU_HUMAN;C9JKR2|C9JKR2_HUMAN;D6RHD5|D6RHD5_HUMAN;B7WNR0|B7WNR0_HUMAN;H0YA55|H0YA55_HUMAN	Carbamidomethylation; Sodium adduct	C3:Carbamidomethylation:1000.00;E4:Sodium adduct:0.00	FALSE
QNC(+57.02)ELFE(+21.98)QLGEYK	52.24	1678.73	13	4.3	840.377	2	21.8811	1410000	14500000	5461	20210526_HS_Frac3-3.raw	4	A0A0C4DGB6|A0A0C4DGB6_HUMAN;A0A087WWT3|A0A087WWT3_HUMAN;P02768|ALBU_HUMAN;C9JKR2|C9JKR2_HUMAN;D6RHD5|D6RHD5_HUMAN;B7WNR0|B7WNR0_HUMAN;H0YA55|H0YA55_HUMAN	Carbamidomethylation; Sodium adduct	C3:Carbamidomethylation:1000.00;E7:Sodium adduct:27.77	FALSE
QNC(+57.02)ELFEQ(+0.98)LGEYK	40.99	1657.73	13	8.7	829.882	2	22.2504	156000	1410000	6006	20210526_HS_Frac2-1.raw	1	A0A0C4DGB6|A0A0C4DGB6_HUMAN;A0A087WWT3|A0A087WWT3_HUMAN;P02768|ALBU_HUMAN;C9JKR2|C9JKR2_HUMAN;D6RHD5|D6RHD5_HUMAN;B7WNR0|B7WNR0_HUMAN;H0YA55|H0YA55_HUMAN	Carbamidomethylation; Deamidation (NQ)	C3:Carbamidomethylation:1000.00;Q8:Deamidation (NQ):0.00	FALSE
QNC(+57.02)ELFEQLGEYK	63.7	1656.75	13	3.1	553.259	3	21.8226	97500000	840000000	5449	20210526_HS_Frac3-2.raw	119	A0A0C4DGB6|A0A0C4DGB6_HUMAN;A0A087WWT3|A0A087WWT3_HUMAN;P02768|ALBU_HUMAN;C9JKR2|C9JKR2_HUMAN;D6RHD5|D6RHD5_HUMAN;B7WNR0|B7WNR0_HUMAN;H0YA55|H0YA55_HUMAN	Carbamidomethylation	C3:Carbamidomethylation:1000.00	FALSE
QQN(+0.98)AQGGFSSTQDTVVALHALSK	38.93	2387.17	23	0.3	796.734	3	21.4978	135000	1740000	5757	20210526_HS_Frac2-1.raw	1	P01023|A2MG_HUMAN	Deamidation (NQ)	N3:Deamidation (NQ):0.00	FALSE
QQNAQGGFSSTQDTVVALHALSK	73.45	2386.19	23	1.1	796.408	3	21.207	5600000	66800000	5663	20210526_HS_Frac2-3.raw	8	P01023|A2MG_HUMAN			FALSE
QSEDSTFYLGER	51.33	1430.63	12	-2.9	716.323	2	16.6077	983000	8210000	3600	20210526_HS_Frac3-3.raw	6	E9PFZ2|E9PFZ2_HUMAN;H7C5R1|H7C5R1_HUMAN;P00450|CERU_HUMAN			FALSE
QSLEASLAETEGR	47.37	1389.67	13	3.2	695.849	2	16.4434	916000	8140000	3548	20210526_HS_Frac3-2.raw	5	#CONTAM#cont|000133|;#CONTAM#cont|000131|;P13645|K1C10_HUMAN;#CONTAM#cont|000129|;#CONTAM#cont|000136|;#CONTAM#cont|000122|;#CONTAM#cont|000130|			FALSE
QSVEADIN(+0.98)GLR	45.92	1201.59	11	0.4	601.807	2	13.8802	81200	460000	2852	20210526_HS_Frac3-3.raw	2	#CONTAM#cont|000133|;#CONTAM#cont|000131|;P13645|K1C10_HUMAN;#CONTAM#cont|000129|;#CONTAM#cont|000136|;#CONTAM#cont|000122|;#CONTAM#cont|000130|	Deamidation (NQ)	N8:Deamidation (NQ):67.12	FALSE
QSVEADINGLR	51.39	1200.61	11	1	601.315	2	16.3898	112000	2450000	3860	20210526_HS_Frac2-3.raw	2	#CONTAM#cont|000133|;#CONTAM#cont|000131|;P13645|K1C10_HUMAN;#CONTAM#cont|000129|;#CONTAM#cont|000136|;#CONTAM#cont|000122|;#CONTAM#cont|000130|			FALSE
QTALVE(+21.98)LVK	42.86	1021.58	9	-2	511.797	2	18.576	3050000	29800000	4585	20210526_HS_Frac2-1.raw	3	A0A0C4DGB6|A0A0C4DGB6_HUMAN;A0A087WWT3|A0A087WWT3_HUMAN;P02768|ALBU_HUMAN;C9JKR2|C9JKR2_HUMAN;D6RHD5|D6RHD5_HUMAN;B7WNR0|B7WNR0_HUMAN;H0YA55|H0YA55_HUMAN	Sodium adduct	E6:Sodium adduct:39.30	FALSE
QTALVELVK	51.62	999.596	9	0.6	500.808	2	21.1503	39800000	422000000	5659	20210526_HS_Frac2-3.raw	97	A0A0C4DGB6|A0A0C4DGB6_HUMAN;A0A087WWT3|A0A087WWT3_HUMAN;P02768|ALBU_HUMAN;C9JKR2|C9JKR2_HUMAN;D6RHD5|D6RHD5_HUMAN;B7WNR0|B7WNR0_HUMAN;H0YA55|H0YA55_HUMAN			FALSE
QTIIVVLENVQR	51.74	1410.82	12	-1.1	706.418	2	23.2341	57600	1220000	5964	20210526_HS_Frac3-1.raw	1	P04114|APOB_HUMAN			FALSE
QTQVSVLPEGGETPLFK	54.36	1828.96	17	4.3	915.493	2	23.0132	508000	7100000	5877	20210526_HS_Frac3-2.raw	4	A0A0A0MS51|A0A0A0MS51_HUMAN;P06396|GELS_HUMAN;A0A0A0MT01|A0A0A0MT01_HUMAN			FALSE
QTVSWAVTPK	53.29	1115.6	10	1.5	558.809	2	19.3829	7070000	49800000	4371	20210526_HS_Frac4-1.raw	9	P01023|A2MG_HUMAN			FALSE
QVGSGVTTDQVQAEAK	62.77	1616.8	16	2.5	809.413	2	14.2686	2350000	13700000	2853	20210526_HS_Frac4-3.raw	5	P01871|IGHM_HUMAN			FALSE
QVLDNLTM(+15.99)EK	36.48	1205.6	10	1.6	603.809	2	13.2508	157000	712000	2908	20210526_HS_Frac2-3.raw	1	K7EQQ3|K7EQQ3_HUMAN;P35527|K1C9_HUMAN	Oxidation (M)		FALSE
QVVAGLNFR	49.51	1002.56	9	0.7	502.29	2	18.2748	2500000	15500000	4515	20210526_HS_Frac2-3.raw	3	P01042|KNG1_HUMAN			FALSE
RHPDYSVVLLLR	68.3	1466.84	12	3.3	489.954	3	23.1537	5700000	24600000	4645	20210526_HS_Frac1-1.raw	11	A0A0C4DGB6|A0A0C4DGB6_HUMAN;P02768|ALBU_HUMAN;C9JKR2|C9JKR2_HUMAN;D6RHD5|D6RHD5_HUMAN;B7WNR0|B7WNR0_HUMAN;H0YA55|H0YA55_HUMAN			FALSE
RHPYFYAPELLFFAK	62.7	1897.99	15	1.6	633.671	3	28.7367	242000	931000	5690	20210526_HS_Frac1-1.raw	1	A0A0C4DGB6|A0A0C4DGB6_HUMAN;P02768|ALBU_HUMAN;H7C013|H7C013_HUMAN;D6RHD5|D6RHD5_HUMAN;B7WNR0|B7WNR0_HUMAN;H0YA55|H0YA55_HUMAN			FALSE
RHPYFYAPELLYYANK	61.02	2044.02	16	2.6	682.349	3	24.9662	59000	550000	5017	20210526_HS_Frac1-1.raw	1	#CONTAM#cont|000097|;#CONTAM#cont|000035|;#CONTAM#cont|000017|			FALSE
RIPIEDGSGEVVLSR	77.59	1625.87	15	3	542.969	3	18.7959	7460000	100000000	4159	20210526_HS_Frac4-1.raw	16	P01024|CO3_HUMAN			FALSE
RPC(+57.02)FSALE(+21.98)VDETYVPK	51.15	1931.91	16	1.9	644.98	3	21.5044	13500000	79600000	5801	20210526_HS_Frac2-3.raw	6	A0A0C4DGB6|A0A0C4DGB6_HUMAN;A0A087WWT3|A0A087WWT3_HUMAN;P02768|ALBU_HUMAN;C9JKR2|C9JKR2_HUMAN;D6RHD5|D6RHD5_HUMAN;B7WNR0|B7WNR0_HUMAN;H0YA55|H0YA55_HUMAN	Carbamidomethylation; Sodium adduct	C3:Carbamidomethylation:1000.00;E8:Sodium adduct:13.45	FALSE
RPC(+57.02)FSALEVD(+21.98)ETYVPK	47.8	1931.91	16	-7.8	483.982	4	21.618	6660000	47000000	5786	20210526_HS_Frac2-1.raw	2	A0A0C4DGB6|A0A0C4DGB6_HUMAN;A0A087WWT3|A0A087WWT3_HUMAN;P02768|ALBU_HUMAN;C9JKR2|C9JKR2_HUMAN;D6RHD5|D6RHD5_HUMAN;B7WNR0|B7WNR0_HUMAN;H0YA55|H0YA55_HUMAN	Carbamidomethylation; Sodium adduct	C3:Carbamidomethylation:1000.00;D10:Sodium adduct:0.00	FALSE
RPC(+57.02)FSALEVDE(+21.98)TYVPK	43.88	1931.91	16	-0.7	966.964	2	21.5044	4200000	30800000	5803	20210526_HS_Frac2-3.raw	5	A0A0C4DGB6|A0A0C4DGB6_HUMAN;A0A087WWT3|A0A087WWT3_HUMAN;P02768|ALBU_HUMAN;C9JKR2|C9JKR2_HUMAN;D6RHD5|D6RHD5_HUMAN;B7WNR0|B7WNR0_HUMAN;H0YA55|H0YA55_HUMAN	Carbamidomethylation; Sodium adduct	C3:Carbamidomethylation:1000.00;E11:Sodium adduct:22.57	FALSE
RPC(+57.02)FSALEVDETYVPK	68.83	1909.92	16	-8.5	637.646	3	23.5439	210000000	3070000000	6556	20210526_HS_Frac2-3.raw	210	A0A0C4DGB6|A0A0C4DGB6_HUMAN;A0A087WWT3|A0A087WWT3_HUMAN;P02768|ALBU_HUMAN;C9JKR2|C9JKR2_HUMAN;D6RHD5|D6RHD5_HUMAN;B7WNR0|B7WNR0_HUMAN;H0YA55|H0YA55_HUMAN	Carbamidomethylation	C3:Carbamidomethylation:1000.00	FALSE
RPWNVASLIYETK	49.86	1575.84	13	1.1	526.29	3	23.6173	43200	944000	6550	20210526_HS_Frac2-1.raw	2	P02748|CO9_HUMAN			FALSE
RQEC(+57.02)SIPVC(+57.02)GQ(+0.98)DQVTVAM(+15.99)TPR	44.5	2448.12	21	9.8	817.058	3	17.6859	34800	611000	3961	20210526_HS_Frac3-2.raw	1	C9JV37|C9JV37_HUMAN;P00734|THRB_HUMAN;E9PIT3|E9PIT3_HUMAN	Carbamidomethylation; Carbamidomethylation; Deamidation (NQ); Oxidation (M)	C4:Carbamidomethylation:1000.00;C9:Carbamidomethylation:1000.00;Q11:Deamidation (NQ):14.04;M18:Oxidation (M):1000.00	FALSE
RQEC(+57.02)SIPVC(+57.02)GQDQVTVAM(+15.99)TPR	61.94	2447.14	21	-0.3	816.722	3	17.5856	1060000	20000000	4262	20210526_HS_Frac2-3.raw	5	C9JV37|C9JV37_HUMAN;P00734|THRB_HUMAN;E9PIT3|E9PIT3_HUMAN	Carbamidomethylation; Carbamidomethylation; Oxidation (M)	C4:Carbamidomethylation:1000.00;C9:Carbamidomethylation:1000.00	FALSE
RQSEDSTFYLGER	39.44	1586.73	13	1.1	529.921	3	15.048	523000	2710000	3479	20210526_HS_Frac2-2.raw	2	E9PFZ2|E9PFZ2_HUMAN;H7C5R1|H7C5R1_HUMAN;P00450|CERU_HUMAN			FALSE
RTHLPEVFLSK	61.76	1325.75	11	4.3	442.924	3	19.0982	793000	8960000	3722	20210526_HS_Frac1-3.raw	6	P02774|VTDB_HUMAN;D6RF35|D6RF35_HUMAN			FALSE
RTVAAPSVFIFPPSDEQLK	40.6	2101.12	19	1.8	701.385	3	25.0218	2060000	10400000	7161	20210526_HS_Frac2-3.raw	4	P01834|IGKC_HUMAN			FALSE
RVAEGTQVLELPFK	47.55	1585.88	14	4	529.639	3	22.7025	48700	525000	6252	20210526_HS_Frac2-3.raw	2	P01008|ANT3_HUMAN			FALSE
RVDTVDPPYPR	70.2	1313.67	11	2.6	438.899	3	13.6416	592000	1450000	2432	20210526_HS_Frac1-3.raw	4	P04004|VTNC_HUMAN			FALSE
RYLQ(+0.98)FDIK	31.28	1082.58	8	3.7	542.297	2	19.3412	15000000	91200000	3881	20210526_HS_Frac1-2.raw	10		Deamidation (NQ)		FALSE
RYTIAALLSPYSYSTTAVVTNPK	67.95	2515.33	23	0.8	839.455	3	26.4775	77200	1030000	7514	20210526_HS_Frac2-1.raw	1	P02766|TTHY_HUMAN;A0A087WT59|A0A087WT59_HUMAN			FALSE
SASDLTWD(+21.98)NLK	48.76	1270.58	11	-0.8	636.3	2	18.7572	786000	11100000	4739	20210526_HS_Frac2-3.raw	5	H7C5E8|H7C5E8_HUMAN;P02787|TRFE_HUMAN	Sodium adduct	D8:Sodium adduct:34.30	FALSE
SASDLTWDNLK	65.45	1248.6	11	-4.8	625.306	2	18.8835	27000000	330000000	4378	20210526_HS_Frac3-3.raw	36	H7C5E8|H7C5E8_HUMAN;P02787|TRFE_HUMAN			FALSE
SASLHLPK	45.35	851.486	8	4.1	426.752	2	8.8222	2600000	3130000	1722	20210526_HS_Frac1-2.raw	4				FALSE
SASNM(+15.99)AIVDVK	41.04	1149.57	11	2.4	575.796	2	7.4049	110000	473000	1538	20210526_HS_Frac3-3.raw	2	P01023|A2MG_HUMAN	Oxidation (M)		FALSE
SC(+57.02)AVAEYGVYVK	64.6	1344.64	12	-1.4	673.328	2	17.6826	90900000	938000000	3753	20210526_HS_Frac4-1.raw	34	P00738|HPT_HUMAN;A0A0A0MRD9|A0A0A0MRD9_HUMAN;J3QLC9|J3QLC9_HUMAN;A0A087WU08|A0A087WU08_HUMAN;H0Y300|H0Y300_HUMAN;A0A0C4DGL8|A0A0C4DGL8_HUMAN;J3QR68|J3QR68_HUMAN;P00739|HPTR_HUMAN	Carbamidomethylation	C2:Carbamidomethylation:1000.00	FALSE
SC(+57.02)DNPYIPN(+0.98)GDYSPLR	69.35	1867.8	16	2.7	934.915	2	20.4323	956000	11100000	4928	20210526_HS_Frac3-2.raw	7	A0A0D9SG88|A0A0D9SG88_HUMAN;P08603|CFAH_HUMAN;Q5TFM2|Q5TFM2_HUMAN	Carbamidomethylation; Deamidation (NQ)	C2:Carbamidomethylation:1000.00;N9:Deamidation (NQ):96.93	FALSE
SC(+57.02)ESNSPFPVHPGTAEC(+57.02)C(+57.02)TK	75.88	2263.93	20	2.7	755.656	3	16.2635	1550000	13800000	3814	20210526_HS_Frac2-3.raw	3	D6RBJ7|D6RBJ7_HUMAN;P02774|VTDB_HUMAN;D6RF20|D6RF20_HUMAN;D6RF35|D6RF35_HUMAN	Carbamidomethylation; Carbamidomethylation; Carbamidomethylation	C2:Carbamidomethylation:1000.00;C17:Carbamidomethylation:1000.00;C18:Carbamidomethylation:1000.00	FALSE
SC(+57.02)VGETTESTQC(+57.02)EDEELEHLR	61.7	2508.04	21	5.8	837.028	3	17.7919	79000	1470000	4353	20210526_HS_Frac2-3.raw	1	P10643|CO7_HUMAN	Carbamidomethylation; Carbamidomethylation	C2:Carbamidomethylation:1000.00;C12:Carbamidomethylation:1000.00	FALSE
SDDKVTLEER	36.89	1190.58	10	2.6	596.298	2	5.6562	555000	832000	999	20210526_HS_Frac1-3.raw	2	P01024|CO3_HUMAN;M0QXZ3|M0QXZ3_HUMAN			FALSE
SDDTAVYYC(+57.02)AR	58.24	1319.55	11	-1.8	660.781	2	7.6611	1530000	5570000	1664	20210526_HS_Frac3-3.raw	4	P23083|HV102_HUMAN	Carbamidomethylation	C9:Carbamidomethylation:1000.00	FALSE
SDVGFLPPFPTLDPEEK	56.87	1886.93	17	1.9	944.477	2	27.6625	1270000	10500000	7161	20210526_HS_Frac4-3.raw	5	P43652|AFAM_HUMAN			FALSE
SDVM(+15.99)YTDWK	48.93	1159.49	9	1.2	580.753	2	13.6051	6120000	28200000	3159	20210526_HS_Frac2-3.raw	10	P19652|A1AG2_HUMAN	Oxidation (M)		FALSE
SDVVYTDWK	51.35	1111.52	9	1.4	556.769	2	15.8884	15900000	92600000	3645	20210526_HS_Frac2-1.raw	15	P02763|A1AG1_HUMAN			FALSE
SEDTAVYYC(+57.02)AR	51.45	1333.56	11	-1.1	667.789	2	7.263	3050000	8980000	1675	20210526_HS_Frac3-3.raw	7	P01742|HV169_HUMAN	Carbamidomethylation	C9:Carbamidomethylation:1000.00	FALSE
SEETKENEGFTVTAEGK	46.12	1854.85	17	0.4	619.293	3	7.4466	3000000	12700000	1585	20210526_HS_Frac2-2.raw	5	P01024|CO3_HUMAN;M0QYC8|M0QYC8_HUMAN			FALSE
SEGSSVNLSPPLEQC(+57.02)VPDR	45.85	2069.97	19	1.4	1036	2	19.9379	326000	4250000	4583	20210526_HS_Frac4-1.raw	3	C9JV37|C9JV37_HUMAN;P00734|THRB_HUMAN;E9PIT3|E9PIT3_HUMAN	Carbamidomethylation	C15:Carbamidomethylation:1000.00	FALSE
SEILAHWSPAK	47.54	1237.65	11	3.7	619.832	2	17.8726	151000	1440000	3460	20210526_HS_Frac1-2.raw	2	P04114|APOB_HUMAN			FALSE
SELEEQLTPVAEETR	64.52	1729.84	15	0.6	865.929	2	18.3375	1000000	12100000	4011	20210526_HS_Frac4-3.raw	5	E7ERP7|E7ERP7_HUMAN;E9PEV4|E9PEV4_HUMAN;P02649|APOE_HUMAN;H0Y7L5|H0Y7L5_HUMAN			FALSE
SELTQQLNALFQDK	59.19	1633.83	14	4.7	817.93	2	25.4738	314000	3630000	6658	20210526_HS_Frac3-2.raw	3	P06727|APOA4_HUMAN			FALSE
SEYQADYESLR	53.83	1359.59	11	0.7	680.808	2	13.6494	5300000	25100000	3053	20210526_HS_Frac2-2.raw	10	P04114|APOB_HUMAN			FALSE
SFDYHQFVDETNDK	47.31	1743.74	14	0.5	872.88	2	19.1513	116000	2930000	4895	20210526_HS_Frac2-3.raw	1	P04114|APOB_HUMAN			FALSE
SGAQATWTELPWPHEK	56.36	1836.88	16	0	919.451	2	23.1076	12200000	99900000	6369	20210526_HS_Frac2-2.raw	12	P02790|HEMO_HUMAN			FALSE
SGFSFGFK	53.33	875.418	8	0.3	438.718	2	20.5308	313000	2990000	5420	20210526_HS_Frac2-2.raw	3	F5GY80|F5GY80_HUMAN;P07358|CO8B_HUMAN;F5H7G1|F5H7G1_HUMAN			FALSE
SGGGFSSGSAGIINYQR	74.3	1656.79	17	3.5	829.406	2	18.164	257000	3160000	4130	20210526_HS_Frac3-3.raw	3	#CONTAM#cont|000132|;#CONTAM#cont|000135|;#CONTAM#cont|000134|;P04264|K2C1_HUMAN			FALSE
SGIPIVTSPYQIHFTK	68.08	1786.96	16	1	894.493	2	24.0497	15100000	152000000	6717	20210526_HS_Frac2-2.raw	14	P01024|CO3_HUMAN			FALSE
SGLSTGWTQLSK	51.7	1263.65	12	1.3	632.834	2	18.6274	7020000	74300000	4660	20210526_HS_Frac2-3.raw	6	P04217|A1BG_HUMAN;M0R009|M0R009_HUMAN			FALSE
SGQSEDRQPVPGQQM(+15.99)TLK	51.43	2000.96	18	0.1	667.996	3	6.6039	1100000	5740000	1316	20210526_HS_Frac2-3.raw	3	P01024|CO3_HUMAN	Oxidation (M)		FALSE
SGSDEVQVGQQR	41.38	1288.6	12	-7.2	645.305	2	4.8373	164000	776000	826	20210526_HS_Frac3-2.raw	6	P01024|CO3_HUMAN;M0QXZ3|M0QXZ3_HUMAN			FALSE
SGSSTASWIQNVDTK	67.8	1579.75	15	5.1	790.888	2	18.0655	1840000	17300000	4095	20210526_HS_Frac3-3.raw	3	P04114|APOB_HUMAN			FALSE
SGTASVVC(+57.02)LLN(+0.98)NFYPR	69.58	1797.87	16	1.9	899.948	2	24.522	53600000	560000000	6259	20210526_HS_Frac4-3.raw	41	A0A5H1ZRQ3|A0A5H1ZRQ3_HUMAN;P01834|IGKC_HUMAN	Carbamidomethylation; Deamidation (NQ)	C8:Carbamidomethylation:1000.00;N11:Deamidation (NQ):12.28	FALSE
SGTASVVC(+57.02)LLNN(+0.98)FYPR	74.34	1797.87	16	2.2	899.948	2	25.9707	2290000	19800000	6720	20210526_HS_Frac4-1.raw	7	A0A5H1ZRQ3|A0A5H1ZRQ3_HUMAN;P01834|IGKC_HUMAN	Carbamidomethylation; Deamidation (NQ)	C8:Carbamidomethylation:1000.00;N12:Deamidation (NQ):17.01	FALSE
SGTASVVC(+57.02)LLNNFYPR	72.93	1796.89	16	-1.9	899.453	2	27.3738	45100000	294000000	7149	20210526_HS_Frac3-3.raw	29	A0A5H1ZRQ3|A0A5H1ZRQ3_HUMAN;P01834|IGKC_HUMAN	Carbamidomethylation	C8:Carbamidomethylation:1000.00	FALSE
SGTASVVC(+57.02)LLNNFYPR(+21.98)	35.4	1818.87	16	0.9	607.3	3	27.3776	3550000	25600000	7230	20210526_HS_Frac3-1.raw	3	A0A5H1ZRQ3|A0A5H1ZRQ3_HUMAN;P01834|IGKC_HUMAN	Carbamidomethylation; Sodium adduct	C8:Carbamidomethylation:1000.00	FALSE
SGTSASLAISGLR	66.04	1218.66	13	3.3	610.34	2	17.9688	7860000	53800000	4392	20210526_HS_Frac2-3.raw	6				FALSE
SHC(+57.02)IAE(+21.98)VE(+21.98)NDEM(+15.99)PADLPSLAADFVESK	58.07	3033.3	27	2.7	1012.11	3	25.989	17000000	88400000	6878	20210526_HS_Frac3-2.raw	4	A0A0C4DGB6|A0A0C4DGB6_HUMAN;P02768|ALBU_HUMAN;C9JKR2|C9JKR2_HUMAN;D6RHD5|D6RHD5_HUMAN;B7WNR0|B7WNR0_HUMAN;H0YA55|H0YA55_HUMAN	Carbamidomethylation; Sodium adduct; Sodium adduct; Oxidation (M)	C3:Carbamidomethylation:1000.00;E6:Sodium adduct:0.00;E8:Sodium adduct:0.00;M12:Oxidation (M):1000.00	FALSE
SHC(+57.02)IAEVE(+21.98)N(+0.98)DEM(+15.99)PADLPSLAADFVESK	48.42	3012.3	27	9.1	1005.12	3	26.0215	152000	1460000	7410	20210526_HS_Frac2-1.raw	1	A0A0C4DGB6|A0A0C4DGB6_HUMAN;P02768|ALBU_HUMAN;C9JKR2|C9JKR2_HUMAN;D6RHD5|D6RHD5_HUMAN;B7WNR0|B7WNR0_HUMAN;H0YA55|H0YA55_HUMAN	Carbamidomethylation; Sodium adduct; Deamidation (NQ); Oxidation (M)	C3:Carbamidomethylation:1000.00;E8:Sodium adduct:0.00;N9:Deamidation (NQ):1000.00;M12:Oxidation (M):1000.00	FALSE
SHC(+57.02)IAEVE(+21.98)NDE(+21.98)MPADLPSLAADFVESK	50.42	3017.3	27	8.4	1006.79	3	26.3293	28100	396000	6965	20210526_HS_Frac3-1.raw	1	A0A0C4DGB6|A0A0C4DGB6_HUMAN;P02768|ALBU_HUMAN;C9JKR2|C9JKR2_HUMAN;D6RHD5|D6RHD5_HUMAN;B7WNR0|B7WNR0_HUMAN;H0YA55|H0YA55_HUMAN	Carbamidomethylation; Sodium adduct; Sodium adduct	C3:Carbamidomethylation:1000.00;E8:Sodium adduct:0.00;E11:Sodium adduct:0.00	FALSE
SHC(+57.02)IAEVE(+21.98)NDEM(+15.99)PADLPSLAADFVESK	68.17	3011.31	27	0.3	753.839	4	26.0921	259000	2870000	7373	20210526_HS_Frac2-2.raw	3	A0A0C4DGB6|A0A0C4DGB6_HUMAN;P02768|ALBU_HUMAN;C9JKR2|C9JKR2_HUMAN;D6RHD5|D6RHD5_HUMAN;B7WNR0|B7WNR0_HUMAN;H0YA55|H0YA55_HUMAN	Carbamidomethylation; Sodium adduct; Oxidation (M)	C3:Carbamidomethylation:1000.00;E8:Sodium adduct:0.00;M12:Oxidation (M):1000.00	FALSE
SHC(+57.02)IAEVEN(+0.98)D(+21.98)EM(+15.99)PADLPSLAADFVESK	49.21	3012.3	27	3.7	603.471	5	26.0194	47900	501000	6866	20210526_HS_Frac3-1.raw	1	A0A0C4DGB6|A0A0C4DGB6_HUMAN;P02768|ALBU_HUMAN;C9JKR2|C9JKR2_HUMAN;D6RHD5|D6RHD5_HUMAN;B7WNR0|B7WNR0_HUMAN;H0YA55|H0YA55_HUMAN	Carbamidomethylation; Deamidation (NQ); Sodium adduct; Oxidation (M)	C3:Carbamidomethylation:1000.00;N9:Deamidation (NQ):1000.00;D10:Sodium adduct:0.00;M12:Oxidation (M):1000.00	FALSE
SHC(+57.02)IAEVEN(+0.98)DE(+21.98)M(+15.99)PADLPSLAADFVESK	63.29	3012.3	27	4.3	754.088	4	26.0047			7369	20210526_HS_Frac2-3.raw	1	A0A0C4DGB6|A0A0C4DGB6_HUMAN;P02768|ALBU_HUMAN;C9JKR2|C9JKR2_HUMAN;D6RHD5|D6RHD5_HUMAN;B7WNR0|B7WNR0_HUMAN;H0YA55|H0YA55_HUMAN	Carbamidomethylation; Deamidation (NQ); Sodium adduct; Oxidation (M)	C3:Carbamidomethylation:1000.00;N9:Deamidation (NQ):1000.00;E11:Sodium adduct:0.00;M12:Oxidation (M):1000.00	FALSE
SHC(+57.02)IAEVEN(+0.98)DEM(+15.99)PADLPSLAADFVESK	86	2990.32	27	8.5	997.791	3	23.503	43600000	615000000	6056	20210526_HS_Frac3-2.raw	20	A0A0C4DGB6|A0A0C4DGB6_HUMAN;P02768|ALBU_HUMAN;C9JKR2|C9JKR2_HUMAN;D6RHD5|D6RHD5_HUMAN;B7WNR0|B7WNR0_HUMAN;H0YA55|H0YA55_HUMAN	Carbamidomethylation; Deamidation (NQ); Oxidation (M)	C3:Carbamidomethylation:1000.00	FALSE
SHC(+57.02)IAEVEN(+0.98)DEM(+15.99)PADLPSLAADFVESKDVC(+57.02)K	36.88	3492.54	31	8.1	874.152	4	25.8744	23800	563000	7329	20210526_HS_Frac2-1.raw	1	A0A0C4DGB6|A0A0C4DGB6_HUMAN;P02768|ALBU_HUMAN;C9JKR2|C9JKR2_HUMAN;D6RHD5|D6RHD5_HUMAN;B7WNR0|B7WNR0_HUMAN;H0YA55|H0YA55_HUMAN	Carbamidomethylation; Deamidation (NQ); Oxidation (M); Carbamidomethylation	C3:Carbamidomethylation:1000.00;C30:Carbamidomethylation:1000.00	FALSE
SHC(+57.02)IAEVEN(+0.98)DEMPADLPSLAADFVESK	38.95	2974.32	27	-3.2	992.447	3	26.0194	510000	3270000	6861	20210526_HS_Frac3-1.raw	1	A0A0C4DGB6|A0A0C4DGB6_HUMAN;P02768|ALBU_HUMAN;C9JKR2|C9JKR2_HUMAN;D6RHD5|D6RHD5_HUMAN;B7WNR0|B7WNR0_HUMAN;H0YA55|H0YA55_HUMAN	Carbamidomethylation; Deamidation (NQ)	C3:Carbamidomethylation:1000.00	FALSE
SHC(+57.02)IAEVEND(+21.98)E(+21.98)M(+15.99)PADLPSLAADFVESK	38.06	3033.3	27	6.6	1012.12	3	26.5856	7650000	38500000	7079	20210526_HS_Frac4-2.raw	1	A0A0C4DGB6|A0A0C4DGB6_HUMAN;P02768|ALBU_HUMAN;C9JKR2|C9JKR2_HUMAN;D6RHD5|D6RHD5_HUMAN;B7WNR0|B7WNR0_HUMAN;H0YA55|H0YA55_HUMAN	Carbamidomethylation; Sodium adduct; Sodium adduct; Oxidation (M)	C3:Carbamidomethylation:1000.00;D10:Sodium adduct:0.00;E11:Sodium adduct:0.00;M12:Oxidation (M):1000.00	FALSE
SHC(+57.02)IAEVEND(+21.98)EM(+15.99)PAD(+21.98)LPSLAADFVESK	58.31	3033.3	27	9.7	1012.12	3	26.6359	2780000	14000000	6942	20210526_HS_Frac3-3.raw	1	A0A0C4DGB6|A0A0C4DGB6_HUMAN;P02768|ALBU_HUMAN;C9JKR2|C9JKR2_HUMAN;D6RHD5|D6RHD5_HUMAN;B7WNR0|B7WNR0_HUMAN;H0YA55|H0YA55_HUMAN	Carbamidomethylation; Sodium adduct; Oxidation (M); Sodium adduct	C3:Carbamidomethylation:1000.00;D10:Sodium adduct:0.00;M12:Oxidation (M):1000.00;D15:Sodium adduct:0.00	FALSE
SHC(+57.02)IAEVEND(+21.98)EM(+15.99)PADLPSLAADFVESK	52.47	3011.31	27	5.8	1004.79	3	26.7247	89500	391000	7053	20210526_HS_Frac3-3.raw	1	A0A0C4DGB6|A0A0C4DGB6_HUMAN;P02768|ALBU_HUMAN;C9JKR2|C9JKR2_HUMAN;D6RHD5|D6RHD5_HUMAN;B7WNR0|B7WNR0_HUMAN;H0YA55|H0YA55_HUMAN	Carbamidomethylation; Sodium adduct; Oxidation (M)	C3:Carbamidomethylation:1000.00;D10:Sodium adduct:0.00;M12:Oxidation (M):1000.00	FALSE
SHC(+57.02)IAEVENDE(+21.98)M(+15.99)PADLPSLAADFVESK	65.6	3011.31	27	-1.9	753.837	4	26.0194	2980000	21700000	6847	20210526_HS_Frac3-1.raw	2	A0A0C4DGB6|A0A0C4DGB6_HUMAN;P02768|ALBU_HUMAN;C9JKR2|C9JKR2_HUMAN;D6RHD5|D6RHD5_HUMAN;B7WNR0|B7WNR0_HUMAN;H0YA55|H0YA55_HUMAN	Carbamidomethylation; Sodium adduct; Oxidation (M)	C3:Carbamidomethylation:1000.00;E11:Sodium adduct:25.70;M12:Oxidation (M):1000.00	FALSE
SHC(+57.02)IAEVENDEM(+15.99)PAD(+21.98)LPSLAADFVESK	85.08	3011.31	27	-0.4	753.838	4	25.9985	1050000	17600000	6826	20210526_HS_Frac3-2.raw	2	A0A0C4DGB6|A0A0C4DGB6_HUMAN;P02768|ALBU_HUMAN;C9JKR2|C9JKR2_HUMAN;D6RHD5|D6RHD5_HUMAN;B7WNR0|B7WNR0_HUMAN;H0YA55|H0YA55_HUMAN	Carbamidomethylation; Oxidation (M); Sodium adduct	C3:Carbamidomethylation:1000.00;M12:Oxidation (M):1000.00;D15:Sodium adduct:8.64	FALSE
SHC(+57.02)IAEVENDEM(+15.99)PADLPSLAADFVESK	103.12	2989.33	27	1.8	997.457	3	24.8824	74100000	1020000000	6481	20210526_HS_Frac3-3.raw	62	A0A0C4DGB6|A0A0C4DGB6_HUMAN;P02768|ALBU_HUMAN;C9JKR2|C9JKR2_HUMAN;D6RHD5|D6RHD5_HUMAN;B7WNR0|B7WNR0_HUMAN;H0YA55|H0YA55_HUMAN	Carbamidomethylation; Oxidation (M)	C3:Carbamidomethylation:1000.00	FALSE
SHC(+57.02)IAEVENDEM(+15.99)PADLPSLAADFVESKDVC(+57.02)K	48.12	3491.55	31	4.4	873.903	4	25.8269			7315	20210526_HS_Frac2-3.raw	3	A0A0C4DGB6|A0A0C4DGB6_HUMAN;P02768|ALBU_HUMAN;C9JKR2|C9JKR2_HUMAN;D6RHD5|D6RHD5_HUMAN;B7WNR0|B7WNR0_HUMAN;H0YA55|H0YA55_HUMAN	Carbamidomethylation; Oxidation (M); Carbamidomethylation	C3:Carbamidomethylation:1000.00;C30:Carbamidomethylation:1000.00	FALSE
SIAQYWLGC(+57.02)PAPGHL	59.61	1668.81	15	1	835.415	2	25.179	925000	8320000	6572	20210526_HS_Frac3-3.raw	3	P04004|VTNC_HUMAN	Carbamidomethylation	C9:Carbamidomethylation:1000.00	FALSE
SIDVAC(+57.02)HPGYALPK	56.63	1526.76	14	1	509.928	3	18.0366	2370000	26600000	4446	20210526_HS_Frac2-3.raw	3	A0A0D9SG88|A0A0D9SG88_HUMAN;P08603|CFAH_HUMAN;Q5TFM2|Q5TFM2_HUMAN	Carbamidomethylation	C6:Carbamidomethylation:1000.00	FALSE
SIEVFGQFN(+0.98)GK	49.15	1225.6	11	0.8	613.809	2	20.2041	406000	5940000	4864	20210526_HS_Frac3-3.raw	3	P02748|CO9_HUMAN	Deamidation (NQ)	N9:Deamidation (NQ):22.85	FALSE
SISTAYLQWSSLK	58.79	1482.77	13	4.7	742.399	2	23.6317	480000	6260000	6100	20210526_HS_Frac3-3.raw	6	A0A0C4DH38|HV551_HUMAN			FALSE
SITC(+57.02)IHGVWTQLPQC(+57.02)VAIDK	60.07	2325.16	20	3.3	776.067	3	24.4503	539000	7190000	6868	20210526_HS_Frac2-3.raw	3	P08603|CFAH_HUMAN	Carbamidomethylation; Carbamidomethylation	C4:Carbamidomethylation:1000.00;C15:Carbamidomethylation:1000.00	FALSE
SKEFQLFSSPHGK	52.29	1490.75	13	4.7	497.927	3	17.5586	2050000	10800000	3341	20210526_HS_Frac1-3.raw	5	P02787|TRFE_HUMAN			FALSE
SKLPGIVAEGR	38.66	1125.65	11	3.6	563.835	2	14.4486	479000	2250000	2608	20210526_HS_Frac1-2.raw	3	P01008|ANT3_HUMAN			FALSE
SLDFTELDVAAEK	61.29	1436.7	13	-4.5	719.358	2	22.1441	2610000	28400000	5562	20210526_HS_Frac3-3.raw	5	P01019|ANGT_HUMAN			FALSE
SLDLDSIIAEVK	47.88	1301.71	12	-1.6	651.862	2	26.2304	2150000	24200000	6874	20210526_HS_Frac3-3.raw	3	#CONTAM#cont|000132|;#CONTAM#cont|000135|;#CONTAM#cont|000134|;P04264|K2C1_HUMAN			FALSE
SLGEC(+57.02)C(+57.02)DVEDSTTC(+57.02)FNAK	86.56	2091.82	18	1.2	1046.92	2	16.8718	749000	8360000	3691	20210526_HS_Frac3-3.raw	3	P02774|VTDB_HUMAN;D6RF35|D6RF35_HUMAN	Carbamidomethylation; Carbamidomethylation; Carbamidomethylation	C5:Carbamidomethylation:1000.00;C6:Carbamidomethylation:1000.00;C14:Carbamidomethylation:1000.00	FALSE
SLGNVIM(+15.99)VC(+57.02)R	42.25	1163.58	10	3.3	582.801	2	16.9994	22100	324000	4049	20210526_HS_Frac2-1.raw	2	A0A0D9SG88|A0A0D9SG88_HUMAN;P08603|CFAH_HUMAN;Q5TFM2|Q5TFM2_HUMAN	Oxidation (M); Carbamidomethylation	C9:Carbamidomethylation:1000.00	FALSE
SLHTLFGDK	66.45	1016.53	9	-2.1	509.271	2	15.571	274000000	1220000000	2993	20210526_HS_Frac1-3.raw	163	A0A0C4DGB6|A0A0C4DGB6_HUMAN;A0A087WWT3|A0A087WWT3_HUMAN;P02768|ALBU_HUMAN;H7C013|H7C013_HUMAN			FALSE
SLIYAASSLQSGVPSK	50.53	1606.86	16	-0.1	804.438	2	19.963	47500	1070000	4782	20210526_HS_Frac3-2.raw	1				FALSE
SLIYAASSLQSGVPSR	58.75	1634.86	16	5.6	818.446	2	20.3235	45700	593000	4913	20210526_HS_Frac3-3.raw	1				FALSE
SLNNQFASFIDK	58.89	1382.68	12	0.9	692.352	2	21.9193	3500000	54500000	5957	20210526_HS_Frac2-3.raw	11	#CONTAM#cont|000132|;#CONTAM#cont|000135|;#CONTAM#cont|000134|;P04264|K2C1_HUMAN			FALSE
SLPEGVAN(+0.98)GIEVYSTK	57.44	1663.83	16	4.9	832.929	2	19.607	343000	4140000	4660	20210526_HS_Frac3-3.raw	4	E7ET33|E7ET33_HUMAN;A0A087WW43|A0A087WW43_HUMAN;Q06033|ITIH3_HUMAN	Deamidation (NQ)		FALSE
SLPVSDSVLSGFEQR	44.02	1619.82	15	3.2	540.949	3	22.8887	1220000	13500000	5832	20210526_HS_Frac3-1.raw	5	P07360|CO8G_HUMAN			FALSE
SLVNLGGSK	35.3	873.492	9	2	437.756	2	8.3569	259000	1030000	1860	20210526_HS_Frac2-2.raw	3	#CONTAM#cont|000132|;#CONTAM#cont|000135|;#CONTAM#cont|000134|;P04264|K2C1_HUMAN			FALSE
SLWDFLK	39.9	907.48	7	-1.1	454.749	2	25.7672	682000	5560000	7283	20210526_HS_Frac2-3.raw	4	P04114|APOB_HUMAN			FALSE
SN(+0.98)LDEDIIAEENIVSR	57.56	1816.87	16	4.8	909.45	2	22.8425	65100	1160000	5722	20210526_HS_Frac4-2.raw	3	P01024|CO3_HUMAN	Deamidation (NQ)	N2:Deamidation (NQ):102.06	FALSE
SNLDED(+21.98)IIAEENIVSR	66.82	1837.87	16	-0.2	613.632	3	22.2255	4070000	42900000	5421	20210526_HS_Frac4-1.raw	6	P01024|CO3_HUMAN	Sodium adduct	D6:Sodium adduct:11.06	FALSE
SNLDEDIIAEENIVSR	73.67	1815.88	16	0.8	908.954	2	22.144	36400000	382000000	5460	20210526_HS_Frac4-2.raw	21	P01024|CO3_HUMAN			FALSE
SPAFTDLHLR	61.58	1155.6	10	5.4	578.812	2	19.1109	622000	5820000	3753	20210526_HS_Frac1-2.raw	3	P04114|APOB_HUMAN			FALSE
SPDVIN(+0.98)GSPISQK	60.95	1341.68	13	1.1	671.849	2	14.4063	10300000	66100000	2965	20210526_HS_Frac3-3.raw	27	A0A0D9SG88|A0A0D9SG88_HUMAN;P08603|CFAH_HUMAN;Q5TFM2|Q5TFM2_HUMAN	Deamidation (NQ)	N6:Deamidation (NQ):25.69	FALSE
SPEQQE(+21.98)TVLDGNLIIR	58.72	1832.92	16	-3.4	611.982	3	22.1646	363000	2520000	5532	20210526_HS_Frac3-1.raw	2	Q14624|ITIH4_HUMAN;B7ZKJ8|B7ZKJ8_HUMAN;H7C0L5|H7C0L5_HUMAN	Sodium adduct	E6:Sodium adduct:47.36	FALSE
SPEQQETVLDGNLIIR	68.54	1810.94	16	3.5	906.485	2	22.1372	4830000	43400000	5553	20210526_HS_Frac3-3.raw	12	Q14624|ITIH4_HUMAN;B7ZKJ8|B7ZKJ8_HUMAN;H7C0L5|H7C0L5_HUMAN			FALSE
SPLFM(+15.99)GK	36.07	794.4	7	2.5	795.412	1	6.7282	2050000	2650000	1509	20210526_HS_Frac2-3.raw	2		Oxidation (M)		FALSE
SPPEISHGVVAHM(+15.99)SDSYQYGEEVTYK	64.79	2925.31	26	0.1	732.339	4	18.3775	1490000	21300000	4577	20210526_HS_Frac2-3.raw	5	P08603|CFAH_HUMAN	Oxidation (M)		FALSE
SPQELLC(+57.02)GASLISDR	50.27	1644.81	15	4.4	549.283	3	22.2461	1180000	11100000	5619	20210526_HS_Frac3-3.raw	4	P00734|THRB_HUMAN;E9PIT3|E9PIT3_HUMAN	Carbamidomethylation	C7:Carbamidomethylation:1000.00	FALSE
SPVGVQ(+0.98)PILNEHTFC(+57.02)AGM(+15.99)SK	35.43	2188.03	20	9.7	730.361	3	24.2246	466000	1260000	6763	20210526_HS_Frac2-3.raw	2	P00738|HPT_HUMAN;J3QLC9|J3QLC9_HUMAN;A0A087WU08|A0A087WU08_HUMAN;H0Y300|H0Y300_HUMAN;A0A0C4DGL8|A0A0C4DGL8_HUMAN;J3QR68|J3QR68_HUMAN	Deamidation (NQ); Carbamidomethylation; Oxidation (M)	Q6:Deamidation (NQ):4.08;C15:Carbamidomethylation:1000.00;M18:Oxidation (M):1000.00	FALSE
SPVGVQPILN(+0.98)EHTFC(+57.02)AGM(+15.99)SK	57.7	2188.03	20	4.2	730.356	3	20.702	1590000	9940000	5438	20210526_HS_Frac2-1.raw	4	P00738|HPT_HUMAN;J3QLC9|J3QLC9_HUMAN;A0A087WU08|A0A087WU08_HUMAN;H0Y300|H0Y300_HUMAN;A0A0C4DGL8|A0A0C4DGL8_HUMAN;J3QR68|J3QR68_HUMAN	Deamidation (NQ); Carbamidomethylation; Oxidation (M)	N10:Deamidation (NQ):61.69;C15:Carbamidomethylation:1000.00;M18:Oxidation (M):1000.00	FALSE
SPVGVQPILNE(+21.98)HTFC(+57.02)AGM(+15.99)SK	63.12	2209.03	20	2.2	737.354	3	20.8039	818000	11600000	5476	20210526_HS_Frac2-1.raw	3	P00738|HPT_HUMAN;J3QLC9|J3QLC9_HUMAN;A0A087WU08|A0A087WU08_HUMAN;H0Y300|H0Y300_HUMAN;A0A0C4DGL8|A0A0C4DGL8_HUMAN;J3QR68|J3QR68_HUMAN	Sodium adduct; Carbamidomethylation; Oxidation (M)	E11:Sodium adduct:71.36;C15:Carbamidomethylation:1000.00;M18:Oxidation (M):1000.00	FALSE
SPVGVQPILNEHTFC(+57.02)AGM(+15.99)SK	72.3	2187.05	20	-6	730.021	3	20.7076	36700000	477000000	5477	20210526_HS_Frac2-3.raw	28	P00738|HPT_HUMAN;J3QLC9|J3QLC9_HUMAN;A0A087WU08|A0A087WU08_HUMAN;H0Y300|H0Y300_HUMAN;A0A0C4DGL8|A0A0C4DGL8_HUMAN;J3QR68|J3QR68_HUMAN	Carbamidomethylation; Oxidation (M)	C15:Carbamidomethylation:1000.00	FALSE
SQYEQLAEQNR	35.65	1364.63	11	1.4	683.327	2	6.7585	5790	237000	1382	20210526_HS_Frac3-3.raw	1	#CONTAM#cont|000133|;#CONTAM#cont|000131|;P13645|K1C10_HUMAN;#CONTAM#cont|000129|;#CONTAM#cont|000136|;#CONTAM#cont|000122|;#CONTAM#cont|000130|			FALSE
SSALDM(+15.99)ENFR	56.72	1184.51	10	3.1	593.268	2	8.2474	7650000	21400000	1906	20210526_HS_Frac2-3.raw	5	Q5T985|Q5T985_HUMAN;Q5T987|Q5T987_HUMAN;P19823|ITIH2_HUMAN	Oxidation (M)		FALSE
SSGLVSNAPGVQIR	59.49	1383.75	14	-0.7	692.883	2	17.6172	148000	1510000	3955	20210526_HS_Frac3-3.raw	2				FALSE
SSGSLLN(+0.98)NAIK	59.63	1103.58	11	2.8	552.802	2	13.3414	4400000	18600000	2904	20210526_HS_Frac2-3.raw	5	P01023|A2MG_HUMAN;P20742|PZP_HUMAN	Deamidation (NQ)	N7:Deamidation (NQ):14.02	FALSE
SSGSLLNN(+0.98)AIK	51.82	1103.58	11	2.2	552.802	2	15.7823	3690000	17200000	3669	20210526_HS_Frac2-3.raw	5	P01023|A2MG_HUMAN;P20742|PZP_HUMAN	Deamidation (NQ)	N8:Deamidation (NQ):17.01	FALSE
SSGSLLNNAIK	60.93	1102.6	11	4.8	552.312	2	16.1089	28900000	225000000	3782	20210526_HS_Frac2-3.raw	11	P01023|A2MG_HUMAN;P20742|PZP_HUMAN			FALSE
SSIDIEN(+0.98)GFISESQYTYALK	40.71	2265.07	20	3.1	1133.55	2	24.3515	52100	1060000	6276	20210526_HS_Frac4-2.raw	1	P08603|CFAH_HUMAN	Deamidation (NQ)	N7:Deamidation (NQ):8.82	FALSE
SSIDIENGFISESQ(+0.98)YTYALK	37.54	2265.07	20	2.3	1133.55	2	24.4461	109000	1540000	6254	20210526_HS_Frac4-1.raw	1	P08603|CFAH_HUMAN	Deamidation (NQ)	Q14:Deamidation (NQ):9.25	FALSE
SSLSVPYVIVPLK	54.94	1400.83	13	-7.8	701.418	2	25.8754	18000000	173000000	6788	20210526_HS_Frac3-3.raw	22	P01024|CO3_HUMAN			FALSE
SSNLIILEEHLK	58.54	1394.78	12	4.5	465.935	3	21.843	1100000	11900000	4389	20210526_HS_Frac1-3.raw	6	P08603|CFAH_HUMAN			FALSE
SSSNE(+21.98)EVM(+15.99)FLTVQVK	50.86	1734.81	15	5.8	579.283	3	21.5543	43600	1190000	5373	20210526_HS_Frac3-3.raw	1	P01023|A2MG_HUMAN;F8W7L3|F8W7L3_HUMAN	Sodium adduct; Oxidation (M)	E5:Sodium adduct:0.00;M8:Oxidation (M):1000.00	FALSE
SSSNEE(+21.98)VM(+15.99)FLTVQVK	46.91	1734.81	15	4	579.282	3	21.6074	292000	3490000	5364	20210526_HS_Frac3-2.raw	2	P01023|A2MG_HUMAN;F8W7L3|F8W7L3_HUMAN	Sodium adduct; Oxidation (M)	E6:Sodium adduct:0.00;M8:Oxidation (M):1000.00	FALSE
SSSNEEVM(+15.99)FLTVQVK	65.46	1712.83	15	4.4	571.955	3	21.584	5910000	87400000	5360	20210526_HS_Frac3-3.raw	10	P01023|A2MG_HUMAN;F8W7L3|F8W7L3_HUMAN	Oxidation (M)		FALSE
STSESTAALGC(+57.02)LVK	59.33	1422.7	14	-1.6	712.36	2	18.0593	9530000	93000000	4094	20210526_HS_Frac3-3.raw	34	P01859|IGHG2_HUMAN;P01861|IGHG4_HUMAN;A0A286YEY4|A0A286YEY4_HUMAN;A0A286YFJ8|A0A286YFJ8_HUMAN	Carbamidomethylation	C11:Carbamidomethylation:1000.00	FALSE
STSGGTAALGC(+57.02)LVK	63.24	1320.67	14	-1.4	661.344	2	20.0275	73400000	406000000	4806	20210526_HS_Frac3-3.raw	41	A0A4W9A917|A0A4W9A917_HUMAN;P01857|IGHG1_HUMAN;P01860|IGHG3_HUMAN;A0A0A0MS08|A0A0A0MS08_HUMAN;A0A0A0MS07|A0A0A0MS07_HUMAN;A0A286YES1|A0A286YES1_HUMAN	Carbamidomethylation	C11:Carbamidomethylation:1000.00	FALSE
STSTAYM(+15.99)ELSSLR	38.73	1460.68	13	2.4	731.352	2	18.7105			4664	20210526_HS_Frac2-1.raw	1	P01742|HV169_HUMAN	Oxidation (M)		FALSE
SVGFHLPSR	46.83	998.53	9	0.4	500.272	2	17.2575	97600	911000	3300	20210526_HS_Frac1-2.raw	2	P04114|APOB_HUMAN			FALSE
SVIPSD(+21.98)GPSVAC(+57.02)VK	49.33	1436.69	14	-0.2	719.357	2	17.4604	1140000	11400000	3889	20210526_HS_Frac3-3.raw	3	F8WCI6|F8WCI6_HUMAN;P02787|TRFE_HUMAN;F8WEK9|F8WEK9_HUMAN;C9JB55|C9JB55_HUMAN	Sodium adduct; Carbamidomethylation	D6:Sodium adduct:51.58;C12:Carbamidomethylation:1000.00	FALSE
SVIPSDGPSVAC(+57.02)VK	62.96	1414.71	14	4.1	708.369	2	18.1564	13900000	157000000	4122	20210526_HS_Frac3-2.raw	30	F8WCI6|F8WCI6_HUMAN;P02787|TRFE_HUMAN;F8WEK9|F8WEK9_HUMAN;C9JB55|C9JB55_HUMAN	Carbamidomethylation	C12:Carbamidomethylation:1000.00	FALSE
SVLGQLGITK	54.86	1014.61	10	-4.9	508.311	2	19.5215	6560000	187000000	5025	20210526_HS_Frac2-3.raw	59				FALSE
SVNDLYIQK	39.31	1078.57	9	2.5	540.294	2	11.5504	1540000	5300000	2660	20210526_HS_Frac2-2.raw	7	P05546|HEP2_HUMAN			FALSE
SVPPSASHVAPTETFTYEWTVPK	39.8	2530.24	23	3	844.426	3	23.7555	4790000	17900000	6593	20210526_HS_Frac2-2.raw	3	E9PFZ2|E9PFZ2_HUMAN;H7C5R1|H7C5R1_HUMAN;P00450|CERU_HUMAN			FALSE
SVSDGIAALDLNAVANK	39.05	1656.87	17	7.9	553.303	3	22.4034	288000	3270000	5648	20210526_HS_Frac3-1.raw	2	P04114|APOB_HUMAN			FALSE
SVSLPSLDPASAK	55.48	1270.68	13	1.7	636.349	2	19.7986	3510000	31400000	4692	20210526_HS_Frac3-2.raw	6	A8MUN2|A8MUN2_HUMAN;P04114|APOB_HUMAN			FALSE
SYSC(+57.02)QVTHEGSTVEK	68.26	1710.75	15	-2.2	856.385	2	5.4098	29600000	106000000	1031	20210526_HS_Frac2-2.raw	20	P0DOY2|IGLC2_HUMAN;A0A0B4J231|A0A0B4J231_HUMAN;P0DOY3|IGLC3_HUMAN;B9A064|IGLL5_HUMAN	Carbamidomethylation	C4:Carbamidomethylation:1000.00	FALSE
SYTVAIAGYALAQM(+15.99)GR	53.75	1686.84	16	5.2	844.435	2	22.0839	3390000	26000000	5534	20210526_HS_Frac3-2.raw	7	M0R0Q9|M0R0Q9_HUMAN;P01024|CO3_HUMAN	Oxidation (M)		FALSE
TAAENDFVTLK	58.42	1207.61	11	1.6	604.815	2	16.884	2660000	15600000	3692	20210526_HS_Frac3-3.raw	7	P35908|K22E_HUMAN			FALSE
TAGWNIPM(+15.99)GLLYNK	59.95	1592.8	14	3.4	797.414	2	24.4703	45500000	262000000	6231	20210526_HS_Frac4-1.raw	30	H7C5E8|H7C5E8_HUMAN;P02787|TRFE_HUMAN	Oxidation (M)		FALSE
TATSEYQTFFNPR	57.6	1560.72	13	-1.7	781.369	2	20.2884	260000	3760000	4907	20210526_HS_Frac3-2.raw	2	C9JV37|C9JV37_HUMAN;P00734|THRB_HUMAN;E9PIT3|E9PIT3_HUMAN			FALSE
TC(+57.02)PKPDDLPFSTVVPLK	43.22	1913	17	4.8	638.678	3	24.0745	756000	6570000	6233	20210526_HS_Frac3-1.raw	4	J3QRN2|J3QRN2_HUMAN;P02749|APOH_HUMAN	Carbamidomethylation	C2:Carbamidomethylation:1000.00	FALSE
TC(+57.02)VAD(+21.98)ESAEN(+0.98)C(+57.02)DK	38.68	1520.54	13	0.1	761.279	2	2.117	190000	901000	330	20210526_HS_Frac3-2.raw	2	A0A0C4DGB6|A0A0C4DGB6_HUMAN;A0A087WWT3|A0A087WWT3_HUMAN;P02768|ALBU_HUMAN;H7C013|H7C013_HUMAN	Carbamidomethylation; Sodium adduct; Deamidation (NQ); Carbamidomethylation	C2:Carbamidomethylation:1000.00;D5:Sodium adduct:12.28;N10:Deamidation (NQ):1000.00;C11:Carbamidomethylation:1000.00	FALSE
TC(+57.02)VAD(+21.98)ESAENC(+57.02)DK	70.73	1519.55	13	-3.3	760.784	2	5.1573	3990000	18100000	942	20210526_HS_Frac3-3.raw	18	A0A0C4DGB6|A0A0C4DGB6_HUMAN;A0A087WWT3|A0A087WWT3_HUMAN;P02768|ALBU_HUMAN;H7C013|H7C013_HUMAN	Carbamidomethylation; Sodium adduct; Carbamidomethylation	C2:Carbamidomethylation:1000.00;D5:Sodium adduct:15.91;C11:Carbamidomethylation:1000.00	FALSE
TC(+57.02)VADE(+21.98)SAEN(+0.98)C(+57.02)DK	44.19	1520.54	13	6.5	761.283	2	2.7497	172000	2190000	459	20210526_HS_Frac3-2.raw	4	A0A0C4DGB6|A0A0C4DGB6_HUMAN;A0A087WWT3|A0A087WWT3_HUMAN;P02768|ALBU_HUMAN;H7C013|H7C013_HUMAN	Carbamidomethylation; Sodium adduct; Deamidation (NQ); Carbamidomethylation	C2:Carbamidomethylation:1000.00;E6:Sodium adduct:0.00;N10:Deamidation (NQ):1000.00;C11:Carbamidomethylation:1000.00	FALSE
TC(+57.02)VADE(+21.98)SAENC(+57.02)DK	62.62	1519.55	13	-6.7	760.781	2	4.2817	1690000	8900000	721	20210526_HS_Frac3-3.raw	9	A0A0C4DGB6|A0A0C4DGB6_HUMAN;A0A087WWT3|A0A087WWT3_HUMAN;P02768|ALBU_HUMAN;H7C013|H7C013_HUMAN	Carbamidomethylation; Sodium adduct; Carbamidomethylation	C2:Carbamidomethylation:1000.00;E6:Sodium adduct:0.00;C11:Carbamidomethylation:1000.00	FALSE
TC(+57.02)VADESAE(+21.98)N(+0.98)C(+57.02)DK	44.04	1520.54	13	6	761.283	2	5.4541	227000	1630000	1052	20210526_HS_Frac3-2.raw	2	A0A0C4DGB6|A0A0C4DGB6_HUMAN;A0A087WWT3|A0A087WWT3_HUMAN;P02768|ALBU_HUMAN;H7C013|H7C013_HUMAN	Carbamidomethylation; Sodium adduct; Deamidation (NQ); Carbamidomethylation	C2:Carbamidomethylation:1000.00;E9:Sodium adduct:0.00;N10:Deamidation (NQ):1000.00;C11:Carbamidomethylation:1000.00	FALSE
TC(+57.02)VADESAE(+21.98)NC(+57.02)DK	73.21	1519.55	13	-2.3	760.785	2	3.421	1410000	8630000	593	20210526_HS_Frac3-2.raw	8	A0A0C4DGB6|A0A0C4DGB6_HUMAN;A0A087WWT3|A0A087WWT3_HUMAN;P02768|ALBU_HUMAN;H7C013|H7C013_HUMAN	Carbamidomethylation; Sodium adduct; Carbamidomethylation	C2:Carbamidomethylation:1000.00;E9:Sodium adduct:9.42;C11:Carbamidomethylation:1000.00	FALSE
TC(+57.02)VADESAEN(+0.98)C(+57.02)DK	55.47	1498.56	13	7	750.293	2	12.9524	2020000	14700000	2649	20210526_HS_Frac3-3.raw	9	A0A0C4DGB6|A0A0C4DGB6_HUMAN;A0A087WWT3|A0A087WWT3_HUMAN;P02768|ALBU_HUMAN;H7C013|H7C013_HUMAN	Carbamidomethylation; Deamidation (NQ); Carbamidomethylation	C2:Carbamidomethylation:1000.00;C11:Carbamidomethylation:1000.00	FALSE
TC(+57.02)VADESAENC(+57.02)DK	89.15	1497.57	13	-4.8	749.792	2	3.8946	30700000	113000000	671	20210526_HS_Frac3-3.raw	78	A0A0C4DGB6|A0A0C4DGB6_HUMAN;A0A087WWT3|A0A087WWT3_HUMAN;P02768|ALBU_HUMAN;H7C013|H7C013_HUMAN	Carbamidomethylation; Carbamidomethylation	C2:Carbamidomethylation:1000.00;C11:Carbamidomethylation:1000.00	FALSE
TEDSSSFLIDK	42.77	1240.58	11	0.5	621.301	2	15.5841	426000	2260000	3281	20210526_HS_Frac3-3.raw	3	P05543|THBG_HUMAN			FALSE
TEDTIFLR	53.17	993.513	8	-2.1	497.765	2	17.0432	34200000	408000000	4072	20210526_HS_Frac2-3.raw	23	P02763|A1AG1_HUMAN;P19652|A1AG2_HUMAN			FALSE
TEGDGVYTLNDK	59.78	1310.6	12	-0.8	656.308	2	8.0086	25400000	228000000	1857	20210526_HS_Frac3-3.raw	35	P00738|HPT_HUMAN;J3QLC9|J3QLC9_HUMAN;H0Y300|H0Y300_HUMAN;A0A0C4DGL8|A0A0C4DGL8_HUMAN;J3KRH2|J3KRH2_HUMAN;J3QR68|J3QR68_HUMAN;P00739|HPTR_HUMAN			FALSE
TEGDGVYTLNNEK	63.38	1438.66	13	-4	720.336	2	7.9787	29700000	52500000	1702	20210526_HS_Frac3-3.raw	3	P00738|HPT_HUMAN;H3BMJ7|H3BMJ7_HUMAN;J3QLC9|J3QLC9_HUMAN;H3BS21|H3BS21_HUMAN;J3KSV1|J3KSV1_HUMAN;J3QQI8|J3QQI8_HUMAN;J3KRH2|J3KRH2_HUMAN			FALSE
TEHGSEM(+15.99)LFFGNAIEGK	49.46	1881.86	17	4.5	628.298	3	20.905	2810000	18200000	5515	20210526_HS_Frac2-1.raw	2	P04114|APOB_HUMAN	Oxidation (M)		FALSE
TEHPFTVEEFVLPK	70.08	1671.85	14	4.5	558.295	3	24.2094	24000000	235000000	6168	20210526_HS_Frac4-1.raw	16	P01023|A2MG_HUMAN			FALSE
TEIDKPSQM(+15.99)QVTDVQDNSISVK	50.72	2477.2	22	2.2	826.744	3	17.1873	185000	2870000	3787	20210526_HS_Frac3-2.raw	3	P02751|FINC_HUMAN;H0Y7Z1|H0Y7Z1_HUMAN	Oxidation (M)		FALSE
TELRPGETLNVNFLLR	63.81	1871.03	16	0.4	624.685	3	25.498	508000	8040000	7171	20210526_HS_Frac2-1.raw	2	P01024|CO3_HUMAN			FALSE
TEQWSTLPPETK	56.72	1415.69	12	1.8	708.858	2	16.6453	991000	3750000	3624	20210526_HS_Frac3-3.raw	5				FALSE
TEVIPPLIENR	58.37	1279.71	11	1.6	640.868	2	20.6807	6730000	42000000	5451	20210526_HS_Frac2-3.raw	7	P04114|APOB_HUMAN			FALSE
TEVNVLPGAK	53.84	1026.57	10	2.4	514.296	2	11.5881	5490000	6360000	2575	20210526_HS_Frac2-2.raw	6	Q5T985|Q5T985_HUMAN;Q5T987|Q5T987_HUMAN;P19823|ITIH2_HUMAN			FALSE
TEVSSN(+0.98)HVLIYLDK	65.92	1617.83	14	2.8	809.926	2	19.6776	151000	2260000	5093	20210526_HS_Frac2-3.raw	3	P01023|A2MG_HUMAN	Deamidation (NQ)		FALSE
TEVSSNHVLIYLDK	78.54	1616.84	14	3.2	809.434	2	19.8099	25000000	181000000	5132	20210526_HS_Frac2-3.raw	16	P01023|A2MG_HUMAN			FALSE
TFTC(+57.02)TAAYPE(+21.98)SK	35.98	1396.59	12	2.7	699.309	2	7.6844	123000	595000	1738	20210526_HS_Frac2-1.raw	1	P01876|IGHA1_HUMAN;A0A286YEY1|A0A286YEY1_HUMAN	Carbamidomethylation; Sodium adduct	C4:Carbamidomethylation:1000.00;E10:Sodium adduct:33.18	FALSE
TFTC(+57.02)TAAYPESK	63.47	1374.61	12	3.1	688.319	2	10.4358	8960000	15500000	2209	20210526_HS_Frac2-3.raw	4	P01876|IGHA1_HUMAN;A0A286YEY1|A0A286YEY1_HUMAN	Carbamidomethylation	C4:Carbamidomethylation:1000.00	FALSE
TFTPQPPGLER	41.45	1241.64	11	3.9	621.833	2	17.4533	2780000	11400000	4229	20210526_HS_Frac2-3.raw	4	P35858|ALS_HUMAN			FALSE
TFYEPGEEITYSC(+57.02)KPGYVSR	64.17	2382.08	20	3	795.041	3	20.1819	2530000	19900000	5266	20210526_HS_Frac2-2.raw	3	J3QRN2|J3QRN2_HUMAN;P02749|APOH_HUMAN	Carbamidomethylation	C13:Carbamidomethylation:1000.00	FALSE
TGAQELLR	39.16	886.487	8	0.1	444.253	2	7.5552	189000	548000	1605	20210526_HS_Frac2-3.raw	1	A0A0A0MS51|A0A0A0MS51_HUMAN;P06396|GELS_HUMAN;A0A0A0MT01|A0A0A0MT01_HUMAN			FALSE
TGESVEFVC(+57.02)K	37.18	1154.53	10	2.9	578.275	2	9.7586	1780000	3740000	2330	20210526_HS_Frac2-2.raw	3	P08603|CFAH_HUMAN	Carbamidomethylation	C9:Carbamidomethylation:1000.00	FALSE
TGISPLALIK	51.95	1011.63	10	1.3	506.827	2	23.2335	4590000	44700000	6423	20210526_HS_Frac2-3.raw	6	A8MUN2|A8MUN2_HUMAN;P04114|APOB_HUMAN			FALSE
TGLLLLSDPDK	57.27	1170.65	11	3.3	586.336	2	21.1002	356000	5080000	5196	20210526_HS_Frac3-3.raw	4	Q14624|ITIH4_HUMAN;B7ZKJ8|B7ZKJ8_HUMAN;H7C0L5|H7C0L5_HUMAN			FALSE
TGLQEVEVK	56.52	1001.54	9	-0.5	501.779	2	9.4262	26500000	133000000	2010	20210526_HS_Frac2-3.raw	15	P01024|CO3_HUMAN			FALSE
THLAPYSDELR	57.61	1300.64	11	0.4	434.555	3	15.1045	18600000	103000000	3138	20210526_HS_Frac1-3.raw	36	F8W696|F8W696_HUMAN;P02647|APOA1_HUMAN			FALSE
THLPEVFLSK	59.97	1169.64	10	4.6	585.832	2	19.9666	1400000	13000000	3922	20210526_HS_Frac1-1.raw	5	P02774|VTDB_HUMAN;D6RF35|D6RF35_HUMAN			FALSE
THTC(+57.02)PPC(+57.02)PAPELLGGPSVFLFPPKPK	65.59	2843.45	26	1.5	948.829	3	27.5168	3990000	20700000	7761	20210526_HS_Frac2-2.raw	14	P01857|IGHG1_HUMAN;A0A0A0MS08|A0A0A0MS08_HUMAN;A0A0A0MS07|A0A0A0MS07_HUMAN	Carbamidomethylation; Carbamidomethylation	C4:Carbamidomethylation:1000.00;C7:Carbamidomethylation:1000.00	FALSE
TILDDLR	39.32	844.465	7	-0.3	423.242	2	17.4035	3570000	28000000	4207	20210526_HS_Frac2-3.raw	5	#CONTAM#cont|000108|;Q5T985|Q5T985_HUMAN;P19823|ITIH2_HUMAN			FALSE
TIYTPGSTVLYR	60.78	1369.72	12	-9	685.866	2	19.505	24700000	223000000	4575	20210526_HS_Frac3-2.raw	15	P01024|CO3_HUMAN			FALSE
TLADLTLLDSPIK	62.86	1398.8	13	2.2	700.41	2	25.3722	2600000	26600000	6546	20210526_HS_Frac4-1.raw	10	P04114|APOB_HUMAN			FALSE
TLEAQLTPR	46.01	1027.57	9	2	514.793	2	11.4934	7740000	21100000	2618	20210526_HS_Frac2-1.raw	9	P05546|HEP2_HUMAN			FALSE
TLLPVSKPEIR	55.44	1251.76	11	2.7	418.26	3	18.742	264000	2590000	3591	20210526_HS_Frac1-1.raw	4	P01031|CO5_HUMAN			FALSE
TLLSNLEEAK	48.07	1116.6	10	3.9	559.313	2	18.791	4400000	35400000	4715	20210526_HS_Frac2-3.raw	3	E5RGB0|E5RGB0_HUMAN;H0YLK8|H0YLK8_HUMAN;P10909|CLUS_HUMAN;E5RH61|E5RH61_HUMAN;E7ETB4|E7ETB4_HUMAN;E5RG36|E5RG36_HUMAN;E5RJZ5|E5RJZ5_HUMAN;E7ERK6|E7ERK6_HUMAN			FALSE
TLM(+15.99)FGSYLDDEK	56.82	1433.64	12	4	717.832	2	20.5702	1480000	19500000	5008	20210526_HS_Frac3-3.raw	4	P19652|A1AG2_HUMAN	Oxidation (M)		FALSE
TLNQPD(+21.98)SQLQLTTGN(+0.98)GLFLSEGLK	55.1	2596.3	24	2.1	866.445	3	26.2737	166000	1590000	6830	20210526_HS_Frac4-1.raw	1		Sodium adduct; Deamidation (NQ)	D6:Sodium adduct:60.32;N15:Deamidation (NQ):38.32	FALSE
TLNQPDSQLQLTTGN(+0.98)GLFLSEGLK	47.72	2574.32	24	2.5	859.118	3	26.2737	1060000	8340000	6815	20210526_HS_Frac4-1.raw	3		Deamidation (NQ)	N15:Deamidation (NQ):56.99	FALSE
TLNQPDSQLQLTTGNGLFLSEGLK	59.48	2573.33	24	2.1	858.79	3	26.2215			6815	20210526_HS_Frac4-1.raw	3				FALSE
TLQGIPQM(+15.99)IGEVIR	55.49	1569.85	14	5.2	524.297	3	23.4025	110000	2850000	6024	20210526_HS_Frac3-3.raw	4	P04114|APOB_HUMAN	Oxidation (M)		FALSE
TM(+15.99)EQFTIHLTVNPQSK	38.68	1888.94	16	-0.2	630.654	3	20.9537	450000	3300000	5543	20210526_HS_Frac2-1.raw	1	P19827|ITIH1_HUMAN;F8WAS2|F8WAS2_HUMAN	Oxidation (M)		FALSE
TM(+15.99)GYQDFADVVC(+57.02)YTQK	50.99	1940.83	16	3.6	971.428	2	21.4893	207000	3160000	5297	20210526_HS_Frac3-1.raw	3	G3XAM2|G3XAM2_HUMAN;A0A2R8Y3M9|A0A2R8Y3M9_HUMAN;A0A087X0I2|A0A087X0I2_HUMAN;E7ETH0|E7ETH0_HUMAN;P05156|CFAI_HUMAN	Oxidation (M); Carbamidomethylation	C12:Carbamidomethylation:1000.00	FALSE
TM(+15.99)QALPYSTVGN(+0.98)SNNYLHLSVLR	42.16	2594.28	23	5.1	865.774	3	24.5824	303000	2610000	6408	20210526_HS_Frac3-1.raw	2	P01024|CO3_HUMAN	Oxidation (M); Deamidation (NQ)	M2:Oxidation (M):1000.00;N12:Deamidation (NQ):0.00	FALSE
TM(+15.99)QALPYSTVGNSN(+0.98)NYLHLSVLR	53.63	2594.28	23	3.8	865.774	3	24.5918	395000	4170000	6396	20210526_HS_Frac3-3.raw	4	P01024|CO3_HUMAN	Oxidation (M); Deamidation (NQ)	M2:Oxidation (M):1000.00;N14:Deamidation (NQ):17.01	FALSE
TM(+15.99)QALPYSTVGNSNNYLHLSVLR	30.44	2593.3	23	3.2	865.445	3	24.7407	85800	958000	6452	20210526_HS_Frac3-2.raw	1	P01024|CO3_HUMAN	Oxidation (M)		FALSE
TM(+15.99)SGLEC(+57.02)QAWDSQSPHAHGYIPSK	56.21	2702.19	24	2.3	676.557	4	18.4101	207000	4380000	4545	20210526_HS_Frac2-1.raw	2	P00747|PLMN_HUMAN	Oxidation (M); Carbamidomethylation	C7:Carbamidomethylation:1000.00	FALSE
TNAENEFVTIK	56.8	1264.63	11	1.7	633.326	2	16.5027	3580000	32300000	3893	20210526_HS_Frac2-3.raw	5	#CONTAM#cont|000132|;#CONTAM#cont|000135|;#CONTAM#cont|000134|;P04264|K2C1_HUMAN			FALSE
TNFDNDIALVR	57.22	1276.64	11	2.7	639.332	2	19.646			4668	20210526_HS_Frac3-3.raw	1				FALSE
TNLESILSYPK	55.9	1263.67	11	3	632.847	2	22.3649	5300000	35500000	5627	20210526_HS_Frac3-3.raw	7	H9KV48|H9KV48_HUMAN;P05155|IC1_HUMAN;E9PGN7|E9PGN7_HUMAN			FALSE
TNQVN(+0.98)SGGVLLR	43.03	1257.67	12	4.1	629.846	2	13.7766	406000	1090000	2844	20210526_HS_Frac3-2.raw	2	P02747|C1QC_HUMAN	Deamidation (NQ)	N5:Deamidation (NQ):55.98	FALSE
TNQVNSGGVLLR	55.66	1256.68	12	1.5	629.353	2	13.7064	2180000	5310000	3019	20210526_HS_Frac2-3.raw	5	P02747|C1QC_HUMAN			FALSE
TPENYPNAGLTM(+15.99)NYC(+57.02)R	42.69	1915.82	16	1.4	958.922	2	16.6077	1020000	8870000	3602	20210526_HS_Frac3-3.raw	5	P00747|PLMN_HUMAN	Oxidation (M); Carbamidomethylation	C15:Carbamidomethylation:1000.00	FALSE
TPEVTC(+57.02)VVVD(+21.98)VSHEDPEVK	72.46	2160	19	4.7	721.014	3	20.8142	4850000	44700000	5519	20210526_HS_Frac2-3.raw	6	P01857|IGHG1_HUMAN;A0A0A0MS08|A0A0A0MS08_HUMAN;A0A0A0MS07|A0A0A0MS07_HUMAN	Carbamidomethylation; Sodium adduct	C6:Carbamidomethylation:1000.00;D10:Sodium adduct:69.90	FALSE
TPEVTC(+57.02)VVVDVSHE(+21.98)DPEVK	63.95	2160	19	1.5	1081.01	2	20.8142	90200	1220000	5526	20210526_HS_Frac2-3.raw	1	P01857|IGHG1_HUMAN;A0A0A0MS08|A0A0A0MS08_HUMAN;A0A0A0MS07|A0A0A0MS07_HUMAN	Carbamidomethylation; Sodium adduct	C6:Carbamidomethylation:1000.00;E14:Sodium adduct:0.00	FALSE
TPEVTC(+57.02)VVVDVSHEDPEVK	77.61	2138.02	19	2.3	713.685	3	20.7955	71900000	461000000	5475	20210526_HS_Frac2-1.raw	82	P01857|IGHG1_HUMAN;A0A0A0MS08|A0A0A0MS08_HUMAN;A0A0A0MS07|A0A0A0MS07_HUMAN	Carbamidomethylation	C6:Carbamidomethylation:1000.00	FALSE
TPEVTC(+57.02)VVVDVSHEDPEVQFK	77.34	2413.15	21	3.4	805.396	3	23.358	2370000	25500000	6477	20210526_HS_Frac2-3.raw	3	A0A4W9A917|A0A4W9A917_HUMAN;P01860|IGHG3_HUMAN;A0A286YES1|A0A286YES1_HUMAN	Carbamidomethylation	C6:Carbamidomethylation:1000.00	FALSE
TPLTATLSK	69.22	930.539	9	0.2	466.279	2	10.3856	54700000	139000000	2257	20210526_HS_Frac2-3.raw	7	P01876|IGHA1_HUMAN;A0A286YEY1|A0A286YEY1_HUMAN			FALSE
TPSAAYLWVGTGASEAEK	66.77	1836.89	18	1.1	919.456	2	21.5397	515000	9790000	5339	20210526_HS_Frac3-2.raw	2	A0A0A0MS51|A0A0A0MS51_HUMAN;P06396|GELS_HUMAN;A0A0A0MT01|A0A0A0MT01_HUMAN			FALSE
TPSC(+57.02)GDIC(+57.02)NFPPK	42.92	1491.65	13	3.8	746.837	2	16.2997	282000	1450000	3523	20210526_HS_Frac3-3.raw	6	P04003|C4BPA_HUMAN	Carbamidomethylation; Carbamidomethylation	C4:Carbamidomethylation:1000.00;C8:Carbamidomethylation:1000.00	FALSE
TQFN(+0.98)NNEYSQDLDAYNTK	39.68	2164.92	18	2.7	1083.47	2	17.9006	78200	996000	3849	20210526_HS_Frac4-3.raw	1	P04114|APOB_HUMAN	Deamidation (NQ)	N4:Deamidation (NQ):0.00	FALSE
TQFNN(+0.98)NEYSQDLDAYNTK	64.67	2164.92	18	6.7	1083.48	2	17.9449			3853	20210526_HS_Frac4-1.raw	1	P04114|APOB_HUMAN	Deamidation (NQ)	N5:Deamidation (NQ):0.00	FALSE
TQFNNNE(+21.98)YSQDLDAYNTK	51.74	2185.92	18	-0.2	729.649	3	18.0604	123000	1070000	3934	20210526_HS_Frac4-2.raw	2	P04114|APOB_HUMAN	Sodium adduct	E7:Sodium adduct:33.81	FALSE
TQFNNNEYSQ(+0.98)DLDAYNTK	40.11	2164.92	18	1.1	1083.47	2	17.9165	80100	1150000	3895	20210526_HS_Frac4-2.raw	1	P04114|APOB_HUMAN	Deamidation (NQ)	Q10:Deamidation (NQ):9.45	FALSE
TQFNNNEYSQDLDAYNTK	81.77	2163.93	18	0.2	1082.98	2	18.0439	922000	11000000	4078	20210526_HS_Frac3-2.raw	5	P04114|APOB_HUMAN			FALSE
TSDQIHFFFAK	50.66	1339.66	11	2.8	447.56	3	22.2728	2350000	17100000	4472	20210526_HS_Frac1-3.raw	8	P01008|ANT3_HUMAN;Q8TCE1|Q8TCE1_HUMAN			FALSE
TSE(+21.98)SGELHGLTTEEEFVEGIYK	36.92	2476.13	22	2.2	826.388	3	24.2259	66100	993000	6768	20210526_HS_Frac2-2.raw	1	P02766|TTHY_HUMAN;A0A087WT59|A0A087WT59_HUMAN	Sodium adduct	E3:Sodium adduct:0.00	FALSE
TSESGELHGLTTEEEFVEGIYK	72.55	2454.14	22	-2.1	819.056	3	24.2192	14600000	136000000	6749	20210526_HS_Frac2-1.raw	7	P02766|TTHY_HUMAN;A0A087WT59|A0A087WT59_HUMAN			FALSE
TSLEDFYLDEER	47.33	1515.67	12	-1.1	758.846	2	21.2547	111000	1590000	5240	20210526_HS_Frac3-2.raw	2	I3L4N7|I3L4N7_HUMAN;P36955|PEDF_HUMAN			FALSE
TSQNSELNNM(+15.99)QDLVEDYKK	53.73	2271.03	19	2.7	758.023	3	16.2337	932000	7390000	3784	20210526_HS_Frac2-3.raw	3	P35908|K22E_HUMAN	Oxidation (M)		FALSE
TSSFALNLPTLPEVK	67.53	1615.88	15	5.1	808.956	2	26.476	3750000	33100000	6945	20210526_HS_Frac4-2.raw	7	P04114|APOB_HUMAN			FALSE
TTNIQGINLLFSSR	70.99	1562.84	14	4.7	782.435	2	24.9366	5030000	62900000	6400	20210526_HS_Frac4-1.raw	13				FALSE
TTPPM(+15.99)LDSD(+21.98)GSFFLYSK	48.54	1942.86	17	-0.1	648.631	3	23.6621	2270000	11500000	6095	20210526_HS_Frac3-3.raw	6	P01859|IGHG2_HUMAN;A0A286YEY4|A0A286YEY4_HUMAN	Oxidation (M); Sodium adduct	M5:Oxidation (M):1000.00;D9:Sodium adduct:22.85	FALSE
TTPPM(+15.99)LDSDGSFFLYSK	52.02	1920.88	17	-0.8	961.45	2	23.6956	78300000	944000000	6222	20210526_HS_Frac3-1.raw	41	P01859|IGHG2_HUMAN;A0A286YEY4|A0A286YEY4_HUMAN	Oxidation (M)		FALSE
TTPPVLD(+21.98)SDGSFFLYSK	31.33	1894.9	17	-3.4	474.731	4	25.0534	15200	499000	6439	20210526_HS_Frac4-1.raw	1	P01857|IGHG1_HUMAN;A0A0A0MS08|A0A0A0MS08_HUMAN;A0A0A0MS07|A0A0A0MS07_HUMAN	Sodium adduct	D7:Sodium adduct:0.00	FALSE
TTPPVLDSD(+21.98)GSFFLYSK	59.78	1894.9	17	-2.2	632.64	3	24.9402	8600000	62500000	6488	20210526_HS_Frac3-3.raw	14	P01857|IGHG1_HUMAN;A0A0A0MS08|A0A0A0MS08_HUMAN;A0A0A0MS07|A0A0A0MS07_HUMAN	Sodium adduct	D9:Sodium adduct:22.85	FALSE
TTPPVLDSDGSFFLYSK	63.98	1872.91	17	3.6	937.471	2	24.6843	99000000	1290000000	6334	20210526_HS_Frac4-1.raw	82	P01857|IGHG1_HUMAN;A0A0A0MS08|A0A0A0MS08_HUMAN;A0A0A0MS07|A0A0A0MS07_HUMAN			FALSE
TTPPVLDSDGSFFLYSR	62.71	1900.92	17	3.5	951.474	2	25.2193	4660000	39600000	6601	20210526_HS_Frac3-2.raw	9	P01861|IGHG4_HUMAN;A0A286YFJ8|A0A286YFJ8_HUMAN			FALSE
TVAAC(+57.02)NLPIVR	55.45	1212.66	11	4	607.344	2	18.471	7480000	60200000	4227	20210526_HS_Frac3-3.raw	6	P02760|AMBP_HUMAN	Carbamidomethylation	C5:Carbamidomethylation:1000.00	FALSE
TVAAPSVFIFPPSD(+21.98)EQLK	52.99	1967	18	-7.7	656.672	3	26.5927	62400000	294000000	6990	20210526_HS_Frac4-2.raw	26	A0A5H1ZRQ3|A0A5H1ZRQ3_HUMAN;P01834|IGKC_HUMAN	Sodium adduct	D14:Sodium adduct:12.28	FALSE
TVAAPSVFIFPPSDE(+21.98)QLK	28.59	1967	18	-8.1	492.755	4	26.2242	295000	874000	6847	20210526_HS_Frac3-3.raw	1	A0A5H1ZRQ3|A0A5H1ZRQ3_HUMAN;P01834|IGKC_HUMAN	Sodium adduct	E15:Sodium adduct:0.00	FALSE
TVAAPSVFIFPPSDEQLK	71.75	1945.02	18	1.9	973.523	2	26.1747	521000000	6630000000	6951	20210526_HS_Frac4-1.raw	166	A0A5H1ZRQ3|A0A5H1ZRQ3_HUMAN;P01834|IGKC_HUMAN			FALSE
TVGSDTFYSFK	32.88	1250.58	11	6.1	626.304	2	18.9608	2070000	26200000	4418	20210526_HS_Frac3-3.raw	3	P01042|KNG1_HUMAN			FALSE
TVM(+15.99)VNIE(+21.98)NPEGIPVK	59.39	1676.84	15	5.2	559.959	3	20.4672	2850000	25600000	4950	20210526_HS_Frac3-3.raw	4	P01024|CO3_HUMAN	Oxidation (M); Sodium adduct	M3:Oxidation (M):1000.00;E7:Sodium adduct:50.22	FALSE
TVM(+15.99)VNIENPE(+21.98)GIPVK	50.16	1676.84	15	2.9	839.434	2	20.4549	253000	3180000	4946	20210526_HS_Frac3-2.raw	2	P01024|CO3_HUMAN	Oxidation (M); Sodium adduct	M3:Oxidation (M):1000.00;E10:Sodium adduct:0.00	FALSE
TVM(+15.99)VNIENPEGIPVK	64.2	1654.86	15	2.5	828.442	2	20.392	14400000	142000000	4926	20210526_HS_Frac3-2.raw	19	P01024|CO3_HUMAN	Oxidation (M)		FALSE
TVQAVLTVPK	51.17	1054.64	10	2.5	528.33	2	17.3973	1600000	6280000	4189	20210526_HS_Frac2-3.raw	3	I3L4N7|I3L4N7_HUMAN;P36955|PEDF_HUMAN			FALSE
TWNAVLLR	32.36	971.555	8	1.6	486.788	2	22.7682			6275	20210526_HS_Frac2-3.raw	1				FALSE
TWYPEVPK	35.87	1018.51	8	-1.5	510.265	2	18.5575	1800000	20700000	4687	20210526_HS_Frac2-3.raw	6	P04003|C4BPA_HUMAN			FALSE
TYE(+21.98)TTLEK	35.11	1005.46	8	-4.5	503.739	2	5.8248	48000000	117000000	1237	20210526_HS_Frac2-3.raw	10	A0A0C4DGB6|A0A0C4DGB6_HUMAN;P02768|ALBU_HUMAN;C9JKR2|C9JKR2_HUMAN;D6RHD5|D6RHD5_HUMAN;B7WNR0|B7WNR0_HUMAN;H0YA55|H0YA55_HUMAN	Sodium adduct	E3:Sodium adduct:26.36	FALSE
TYETTLE(+21.98)K	31.89	1005.46	8	-4.5	503.739	2	5.8248	48000000	51900000	1806	20210526_HS_Frac2-3.raw	4	A0A0C4DGB6|A0A0C4DGB6_HUMAN;P02768|ALBU_HUMAN;C9JKR2|C9JKR2_HUMAN;D6RHD5|D6RHD5_HUMAN;B7WNR0|B7WNR0_HUMAN;H0YA55|H0YA55_HUMAN	Sodium adduct	E7:Sodium adduct:20.00	FALSE
TYETTLEK	51.58	983.481	8	-1.5	492.749	2	11.7937	415000000	1630000000	1955	20210526_HS_Frac2-3.raw	142	A0A0C4DGB6|A0A0C4DGB6_HUMAN;P02768|ALBU_HUMAN;C9JKR2|C9JKR2_HUMAN;D6RHD5|D6RHD5_HUMAN;B7WNR0|B7WNR0_HUMAN;H0YA55|H0YA55_HUMAN			FALSE
TYM(+15.99)LAFDVNDEK	59.58	1460.65	12	-1.2	731.334	2	19.8658	5190000	42300000	4568	20210526_HS_Frac4-3.raw	10	P02763|A1AG1_HUMAN	Oxidation (M)		FALSE
VAEGTQVLELPFK	62.96	1429.78	13	-2.5	715.899	2	23.6071	1810000	22900000	6094	20210526_HS_Frac3-2.raw	12	P01008|ANT3_HUMAN			FALSE
VATVSLPR	37.08	841.502	8	-1.9	421.759	2	13.8802	47600000	251000000	2831	20210526_HS_Frac3-3.raw	26	#CONTAM#cont|000144|;#CONTAM#cont|000142|;#CONTAM#cont|000023|;#CONTAM#cont|000143|;#CONTAM#cont|000141|;#CONTAM#cont|000040|;#CONTAM#cont|000032|			FALSE
VC(+57.02)PFAGILEN(+0.98)GAVR	50.41	1502.76	14	2.8	501.929	3	23.2932	2020000	15600000	5978	20210526_HS_Frac3-2.raw	3	J3QLI0|J3QLI0_HUMAN;J3QRN2|J3QRN2_HUMAN;P02749|APOH_HUMAN	Carbamidomethylation; Deamidation (NQ)	C2:Carbamidomethylation:1000.00	FALSE
VC(+57.02)PFAGILENGAVR	44.06	1501.77	14	1.2	501.6	3	23.705	353000	2090000	6126	20210526_HS_Frac3-1.raw	3	J3QLI0|J3QLI0_HUMAN;J3QRN2|J3QRN2_HUMAN;P02749|APOH_HUMAN	Carbamidomethylation	C2:Carbamidomethylation:1000.00	FALSE
VC(+57.02)SQYAAYGEK	45.83	1274.56	11	-3.7	638.288	2	6.3419	444000	1660000	1199	20210526_HS_Frac2-3.raw	3	D6RBJ7|D6RBJ7_HUMAN;P02774|VTDB_HUMAN;D6RF35|D6RF35_HUMAN	Carbamidomethylation	C2:Carbamidomethylation:1000.00	FALSE
VD(+21.98)NALQSGNSQESVTEQDSK	41.86	2156.94	20	1.7	719.992	3	10.0773	141000	384000	2052	20210526_HS_Frac4-1.raw	2	A0A5H1ZRQ3|A0A5H1ZRQ3_HUMAN;P01834|IGKC_HUMAN	Sodium adduct	D2:Sodium adduct:0.00	FALSE
VDFTLSSER	45.71	1052.51	9	-0.4	527.266	2	15.4039	19100000	74000000	3502	20210526_HS_Frac2-2.raw	10				FALSE
VDLLNQEIEFLK	59.07	1459.79	12	2.1	730.908	2	25.9516	807000	8490000	6808	20210526_HS_Frac3-2.raw	3	P35908|K22E_HUMAN			FALSE
VDLSFSPSQSLPASHAHLR	66.22	2048.04	19	1.1	513.021	4	20.7265	3420000	35900000	5484	20210526_HS_Frac2-2.raw	10	P01023|A2MG_HUMAN			FALSE
VDNALQ(+0.98)SGN(+0.98)SQ(+0.98)ESVTEQDSK	57.5	2137.91	20	3.3	1069.97	2	15.5902	51000	767000	3175	20210526_HS_Frac4-2.raw	1	A0A5H1ZRQ3|A0A5H1ZRQ3_HUMAN;P01834|IGKC_HUMAN	Deamidation (NQ); Deamidation (NQ); Deamidation (NQ)	Q6:Deamidation (NQ):32.97;N9:Deamidation (NQ):16.36;Q11:Deamidation (NQ):13.99	FALSE
VDNALQ(+0.98)SGN(+0.98)SQESVTEQDSK	44.36	2136.93	20	9.4	713.326	3	6.1397	83500	407000	1207	20210526_HS_Frac4-1.raw	3	A0A5H1ZRQ3|A0A5H1ZRQ3_HUMAN;P01834|IGKC_HUMAN	Deamidation (NQ); Deamidation (NQ)	Q6:Deamidation (NQ):0.00;N9:Deamidation (NQ):0.00	FALSE
VDNALQ(+0.98)SGNSQ(+0.98)ESVTEQDSK	49.27	2136.93	20	8.2	713.326	3	14.2756	141000	480000	3042	20210526_HS_Frac4-3.raw	2	A0A5H1ZRQ3|A0A5H1ZRQ3_HUMAN;P01834|IGKC_HUMAN	Deamidation (NQ); Deamidation (NQ)	Q6:Deamidation (NQ):0.00;Q11:Deamidation (NQ):0.00	FALSE
VDNALQ(+0.98)SGNSQE(+21.98)SVTEQDSK	40.22	2157.93	20	7.1	720.324	3	15.8935	1190000	1860000	3316	20210526_HS_Frac4-2.raw	4	A0A5H1ZRQ3|A0A5H1ZRQ3_HUMAN;P01834|IGKC_HUMAN	Deamidation (NQ); Sodium adduct	Q6:Deamidation (NQ):12.33;E12:Sodium adduct:12.11	FALSE
VDNALQ(+0.98)SGNSQESVTEQDSKDSTYSLSSTLTLSK	38.87	3619.69	34	-0.8	1207.57	3	21.361			5281	20210526_HS_Frac3-2.raw	1	A0A5H1ZRQ3|A0A5H1ZRQ3_HUMAN;P01834|IGKC_HUMAN	Deamidation (NQ)	Q6:Deamidation (NQ):0.00	FALSE
VDNALQSGN(+0.98)SQE(+21.98)SVTEQDSK	35.83	2157.93	20	7.1	720.324	3	10.6252	552000	1340000	2198	20210526_HS_Frac4-3.raw	4	A0A5H1ZRQ3|A0A5H1ZRQ3_HUMAN;P01834|IGKC_HUMAN	Deamidation (NQ); Sodium adduct	N9:Deamidation (NQ):0.00;E12:Sodium adduct:9.21	FALSE
VDNALQSGN(+0.98)SQESVTEQDSK	39.37	2135.95	20	5.3	712.995	3	14.1175	444000	1050000	2701	20210526_HS_Frac4-1.raw	3	A0A5H1ZRQ3|A0A5H1ZRQ3_HUMAN;P01834|IGKC_HUMAN	Deamidation (NQ)	N9:Deamidation (NQ):0.00	FALSE
VDNALQSGNSQ(+0.98)E(+21.98)SVTEQDSK	35.93	2157.93	20	7.1	720.324	3	15.8935	671000	920000	3519	20210526_HS_Frac4-2.raw	2	A0A5H1ZRQ3|A0A5H1ZRQ3_HUMAN;P01834|IGKC_HUMAN	Deamidation (NQ); Sodium adduct	Q11:Deamidation (NQ):0.00;E12:Sodium adduct:0.00	FALSE
VDNALQSGNSQE(+21.98)SVTEQDSK	81.19	2156.94	20	-2.9	1079.48	2	6.963	84600000	800000000	1349	20210526_HS_Frac4-2.raw	55	A0A5H1ZRQ3|A0A5H1ZRQ3_HUMAN;P01834|IGKC_HUMAN	Sodium adduct	E12:Sodium adduct:38.67	FALSE
VDNALQSGNSQESVTEQDSK	91.71	2134.96	20	-2.9	1068.49	2	6.1638	115000000	1010000000	1678	20210526_HS_Frac4-1.raw	108	A0A5H1ZRQ3|A0A5H1ZRQ3_HUMAN;P01834|IGKC_HUMAN			FALSE
VDNALQSGNSQESVTEQDSKDSTYSLSSTLTLSK	42.22	3618.7	34	7.2	905.692	4	21.3735			5257	20210526_HS_Frac3-1.raw	2	A0A5H1ZRQ3|A0A5H1ZRQ3_HUMAN;P01834|IGKC_HUMAN			FALSE
VDTVDPPYPR	38.29	1157.57	10	2	579.796	2	13.4892	1530000	3450000	2797	20210526_HS_Frac3-2.raw	5	P04004|VTNC_HUMAN			FALSE
VEAEDVGVYYC(+57.02)M(+15.99)QR	48.55	1733.74	14	3.1	867.882	2	16.8143	240000	2410000	3633	20210526_HS_Frac3-1.raw	3		Carbamidomethylation; Oxidation (M)	C11:Carbamidomethylation:1000.00	FALSE
VEDIPLAR	36.48	911.508	8	0.9	456.763	2	12.9874	3120000	14100000	2881	20210526_HS_Frac2-2.raw	11	P04114|APOB_HUMAN			FALSE
VELLHNPAFC(+57.02)SLATTK	70.41	1799.92	16	-0.4	600.984	3	21.9357	15700000	150000000	5959	20210526_HS_Frac2-3.raw	15	P01024|CO3_HUMAN	Carbamidomethylation	C10:Carbamidomethylation:1000.00	FALSE
VEYGFQVK	42.93	968.497	8	-0.5	485.257	2	14.9302	9510000	56000000	3389	20210526_HS_Frac2-2.raw	13				FALSE
VFAIPPSFASIFLTK	37.23	1636.92	15	0.8	819.472	2	31.6463	143000	692000	8158	20210526_HS_Frac3-1.raw	1	P01871|IGHM_HUMAN			FALSE
VFD(+21.98)EFKPLVEEPQNLIK	41.82	2066.07	17	6.2	689.705	3	24.9673	637000	489000	7032	20210526_HS_Frac2-3.raw	2	A0A0C4DGB6|A0A0C4DGB6_HUMAN;A0A087WWT3|A0A087WWT3_HUMAN;P02768|ALBU_HUMAN;C9JKR2|C9JKR2_HUMAN;D6RHD5|D6RHD5_HUMAN;B7WNR0|B7WNR0_HUMAN;H0YA55|H0YA55_HUMAN	Sodium adduct	D3:Sodium adduct:0.00	FALSE
VFDE(+21.98)FKPLVEEPQNLIK	42.66	2066.07	17	-0.2	689.7	3	28.7851	880000	490000	8115	20210526_HS_Frac2-2.raw	3	A0A0C4DGB6|A0A0C4DGB6_HUMAN;A0A087WWT3|A0A087WWT3_HUMAN;P02768|ALBU_HUMAN;C9JKR2|C9JKR2_HUMAN;D6RHD5|D6RHD5_HUMAN;B7WNR0|B7WNR0_HUMAN;H0YA55|H0YA55_HUMAN	Sodium adduct	E4:Sodium adduct:14.02	FALSE
VFDEFKPLVE(+21.98)EPQN(+0.98)LIK	41.92	2067.05	17	1.2	690.029	3	25.4654	333000	4520000	7170	20210526_HS_Frac2-2.raw	2	A0A0C4DGB6|A0A0C4DGB6_HUMAN;A0A087WWT3|A0A087WWT3_HUMAN;P02768|ALBU_HUMAN;C9JKR2|C9JKR2_HUMAN;D6RHD5|D6RHD5_HUMAN;B7WNR0|B7WNR0_HUMAN;H0YA55|H0YA55_HUMAN	Sodium adduct; Deamidation (NQ)	E10:Sodium adduct:0.00;N14:Deamidation (NQ):11.06	FALSE
VFDEFKPLVE(+21.98)EPQNLIK	66.23	2066.07	17	1.9	689.701	3	25.576	5890000	60100000	7235	20210526_HS_Frac2-1.raw	5	A0A0C4DGB6|A0A0C4DGB6_HUMAN;A0A087WWT3|A0A087WWT3_HUMAN;P02768|ALBU_HUMAN;C9JKR2|C9JKR2_HUMAN;D6RHD5|D6RHD5_HUMAN;B7WNR0|B7WNR0_HUMAN;H0YA55|H0YA55_HUMAN	Sodium adduct	E10:Sodium adduct:0.00	FALSE
VFDEFKPLVEE(+21.98)PQNLIK	60.89	2066.07	17	3.8	689.703	3	25.648	4130000	48100000	7253	20210526_HS_Frac2-3.raw	13	A0A0C4DGB6|A0A0C4DGB6_HUMAN;A0A087WWT3|A0A087WWT3_HUMAN;P02768|ALBU_HUMAN;C9JKR2|C9JKR2_HUMAN;D6RHD5|D6RHD5_HUMAN;B7WNR0|B7WNR0_HUMAN;H0YA55|H0YA55_HUMAN	Sodium adduct	E11:Sodium adduct:27.96	FALSE
VFDEFKPLVEEPQ(+0.98)N(+0.98)LIK	37.26	2046.06	17	5	683.032	3	25.4354	4900000	66800000	7154	20210526_HS_Frac2-1.raw	2	A0A0C4DGB6|A0A0C4DGB6_HUMAN;A0A087WWT3|A0A087WWT3_HUMAN;P02768|ALBU_HUMAN;C9JKR2|C9JKR2_HUMAN;D6RHD5|D6RHD5_HUMAN;B7WNR0|B7WNR0_HUMAN;H0YA55|H0YA55_HUMAN	Deamidation (NQ); Deamidation (NQ)		FALSE
VFDEFKPLVEEPQ(+0.98)NLIK	43.98	2045.07	17	4.8	682.703	3	34.1795	146000000	398000000	9313	20210526_HS_Frac2-1.raw	38	A0A0C4DGB6|A0A0C4DGB6_HUMAN;A0A087WWT3|A0A087WWT3_HUMAN;P02768|ALBU_HUMAN;C9JKR2|C9JKR2_HUMAN;D6RHD5|D6RHD5_HUMAN;B7WNR0|B7WNR0_HUMAN;H0YA55|H0YA55_HUMAN	Deamidation (NQ)	Q13:Deamidation (NQ):7.65	FALSE
VFDEFKPLVEEPQN(+0.98)LIK	70.96	2045.07	17	-5.7	682.697	3	25.3918	63400000	80300000	7167	20210526_HS_Frac2-3.raw	12	A0A0C4DGB6|A0A0C4DGB6_HUMAN;A0A087WWT3|A0A087WWT3_HUMAN;P02768|ALBU_HUMAN;C9JKR2|C9JKR2_HUMAN;D6RHD5|D6RHD5_HUMAN;B7WNR0|B7WNR0_HUMAN;H0YA55|H0YA55_HUMAN	Deamidation (NQ)	N14:Deamidation (NQ):11.06	FALSE
VFDEFKPLVEEPQNLIK	77.13	2044.09	17	1	1023.06	2	27.814	396000000	3050000000	7870	20210526_HS_Frac2-3.raw	235	A0A0C4DGB6|A0A0C4DGB6_HUMAN;A0A087WWT3|A0A087WWT3_HUMAN;P02768|ALBU_HUMAN;C9JKR2|C9JKR2_HUMAN;D6RHD5|D6RHD5_HUMAN;B7WNR0|B7WNR0_HUMAN;H0YA55|H0YA55_HUMAN			FALSE
VFQFLEK	41.08	909.496	7	-0.8	455.757	2	19.4757	1000000	8410000	5011	20210526_HS_Frac2-3.raw	3	P01031|CO5_HUMAN			FALSE
VFSLQWGEVK	51.94	1191.63	10	4.1	596.826	2	23.072	934000	9440000	6339	20210526_HS_Frac2-1.raw	3	G3XAM2|G3XAM2_HUMAN;A0A2R8Y3M9|A0A2R8Y3M9_HUMAN;E7ETH0|E7ETH0_HUMAN;P05156|CFAI_HUMAN			FALSE
VFSN(+0.98)GADLSGVTE(+21.98)EAPLK	49.51	1855.88	18	2	928.953	2	21.0163	3420000	23100000	4934	20210526_HS_Frac4-3.raw	3		Deamidation (NQ); Sodium adduct	N4:Deamidation (NQ):1000.00;E13:Sodium adduct:0.00	FALSE
VFSN(+0.98)GADLSGVTEEAPLK	66.62	1833.9	18	0.6	917.961	2	21.0527	146000000	1310000000	5237	20210526_HS_Frac3-3.raw	86		Deamidation (NQ)		FALSE
VFSNGAD(+21.98)LSGVTEEAPLK	56.77	1854.9	18	3.2	619.311	3	20.6637	1330000	14600000	4839	20210526_HS_Frac4-1.raw	6		Sodium adduct	D7:Sodium adduct:34.80	FALSE
VFSNGADLSGVTEEAPLK	74.03	1832.92	18	0.9	917.469	2	20.6637	24500000	209000000	4851	20210526_HS_Frac4-1.raw	15				FALSE
VGAHAGEYGAEALER	49.49	1528.73	15	1	510.586	3	12.5174	2530000	6850000	2694	20210526_HS_Frac2-3.raw	5	P69905|HBA_HUMAN;A0A2R8Y7C0|A0A2R8Y7C0_HUMAN			FALSE
VGDTLN(+0.98)LNLR	39.28	1114.6	10	4.3	558.31	2	18.503	29200	378000	4208	20210526_HS_Frac3-1.raw	1		Deamidation (NQ)	N6:Deamidation (NQ):26.31	FALSE
VGDTLNLNLR	59.11	1113.61	10	2.2	557.818	2	18.9551	23000000	162000000	4798	20210526_HS_Frac2-3.raw	7				FALSE
VGEYSLYIGR	53.04	1155.59	10	0.1	578.806	2	18.823	6910000	56900000	4725	20210526_HS_Frac2-3.raw	10	P02743|SAMP_HUMAN			FALSE
VGFYESDVM(+15.99)GR	49.17	1274.56	11	-0.5	638.29	2	14.2076	39200000	149000000	3122	20210526_HS_Frac2-3.raw	19	P01023|A2MG_HUMAN	Oxidation (M)		FALSE
VGSALFLSHNLK	35.93	1284.72	12	1	429.247	3	19.4633			3852	20210526_HS_Frac1-2.raw	1	P29622|KAIN_HUMAN			FALSE
VGYVSGWGQSDNFK	69.3	1542.71	14	3.8	772.368	2	19.3948	1120000	7110000	4572	20210526_HS_Frac3-3.raw	3	A0A0A0MRD9|A0A0A0MRD9_HUMAN;P00739|HPTR_HUMAN			FALSE
VGYVSGWGR	64.73	979.487	9	-1.8	490.752	2	15.2538	67000000	425000000	3500	20210526_HS_Frac2-3.raw	21	P00738|HPT_HUMAN;J3QLC9|J3QLC9_HUMAN;H3BS21|H3BS21_HUMAN;A0A087WU08|A0A087WU08_HUMAN;H0Y300|H0Y300_HUMAN;A0A0C4DGL8|A0A0C4DGL8_HUMAN;J3QR68|J3QR68_HUMAN			FALSE
VHQYFNVE(+21.98)LIQPGAVK	39.77	1862.97	16	-2.2	621.996	3	23.4112	138000	1610000	6478	20210526_HS_Frac2-1.raw	2	P01024|CO3_HUMAN;M0QYC8|M0QYC8_HUMAN	Sodium adduct	E8:Sodium adduct:0.00	FALSE
VHQYFNVELIQPGAVK	73.76	1840.98	16	4	921.506	2	23.4139	10700000	87500000	6483	20210526_HS_Frac2-2.raw	10	P01024|CO3_HUMAN;M0QYC8|M0QYC8_HUMAN			FALSE
VHTE(+21.98)C(+57.02)C(+57.02)HGD(+21.98)LLEC(+57.02)ADDR	42.78	2129.79	17	8.8	710.947	3	16.1233	18700000	82800000	3532	20210526_HS_Frac3-2.raw	6	A0A0C4DGB6|A0A0C4DGB6_HUMAN;P02768|ALBU_HUMAN;C9JKR2|C9JKR2_HUMAN;D6RHD5|D6RHD5_HUMAN;B7WNR0|B7WNR0_HUMAN;H0YA55|H0YA55_HUMAN	Sodium adduct; Carbamidomethylation; Carbamidomethylation; Sodium adduct; Carbamidomethylation	E4:Sodium adduct:24.34;C5:Carbamidomethylation:1000.00;C6:Carbamidomethylation:1000.00;D9:Sodium adduct:38.16;C13:Carbamidomethylation:1000.00	FALSE
VHTEC(+57.02)C(+57.02)HGDLLEC(+57.02)ADDR	80.23	2085.83	17	4.7	696.287	3	13.8849	26800000	111000000	2497	20210526_HS_Frac1-3.raw	64	A0A0C4DGB6|A0A0C4DGB6_HUMAN;P02768|ALBU_HUMAN;C9JKR2|C9JKR2_HUMAN;D6RHD5|D6RHD5_HUMAN;B7WNR0|B7WNR0_HUMAN;H0YA55|H0YA55_HUMAN	Carbamidomethylation; Carbamidomethylation; Carbamidomethylation	C5:Carbamidomethylation:1000.00;C6:Carbamidomethylation:1000.00;C13:Carbamidomethylation:1000.00	FALSE
VHTEC(+57.02)C(+57.02)HGDLLEC(+57.02)ADDRADLAK	75.79	2584.11	22	0	517.831	5	17.2385	9990000	126000000	4156	20210526_HS_Frac2-2.raw	20	A0A0C4DGB6|A0A0C4DGB6_HUMAN;P02768|ALBU_HUMAN;C9JKR2|C9JKR2_HUMAN;D6RHD5|D6RHD5_HUMAN;B7WNR0|B7WNR0_HUMAN;H0YA55|H0YA55_HUMAN	Carbamidomethylation; Carbamidomethylation; Carbamidomethylation	C5:Carbamidomethylation:1000.00;C6:Carbamidomethylation:1000.00;C13:Carbamidomethylation:1000.00	FALSE
VIGNM(+15.99)GQTM(+15.99)EQLTPELK	53.66	1919.93	17	2	960.98	2	17.9331	1620000	14600000	3920	20210526_HS_Frac4-2.raw	4	A8MUN2|A8MUN2_HUMAN;P04114|APOB_HUMAN	Oxidation (M); Oxidation (M)		FALSE
VILGAHQEVNLEPHVQEIEVSR	71.17	2495.31	22	0.8	624.838	4	21.7956	1740000	22900000	5858	20210526_HS_Frac2-1.raw	2	P00747|PLMN_HUMAN			FALSE
VIPAC(+57.02)LPSPNYVVADR	56.63	1769.91	16	3.2	885.97	2	22.1793	1970000	14800000	5576	20210526_HS_Frac3-3.raw	3	P00747|PLMN_HUMAN	Carbamidomethylation	C5:Carbamidomethylation:1000.00	FALSE
VKDLATVYVDVLK	54.38	1461.84	13	-2.1	731.93	2	22.6912	342000	4320000	6201	20210526_HS_Frac2-1.raw	2	P02647|APOA1_HUMAN			FALSE
VLDELTLAR	41.41	1028.59	9	-0.9	515.302	2	18.6206	286000	3160000	4653	20210526_HS_Frac2-3.raw	3				FALSE
VLDELTLTK	46.58	1030.59	9	1.5	516.306	2	17.8675			4386	20210526_HS_Frac2-3.raw	1	#CONTAM#cont|000133|;#CONTAM#cont|000131|;P13645|K1C10_HUMAN;#CONTAM#cont|000129|;#CONTAM#cont|000136|;#CONTAM#cont|000122|;#CONTAM#cont|000130|			FALSE
VLFYVDSEK	42.52	1098.56	9	2.9	550.29	2	17.9145	239000	2150000	4382	20210526_HS_Frac2-1.raw	1	P10643|CO7_HUMAN			FALSE
VLGAFSDGLAHLDNLK	57.24	1668.88	16	4.4	557.307	3	23.9384	1130000	12600000	6687	20210526_HS_Frac2-3.raw	3	F8W6P5|F8W6P5_HUMAN;P02042|HBD_HUMAN;P68871|HBB_HUMAN;A0A2R8Y7R2|A0A2R8Y7R2_HUMAN			FALSE
VLLDGVQNPR	52.08	1109.62	10	0.9	555.82	2	14.5823	41600000	260000000	3438	20210526_HS_Frac2-3.raw	22	P01024|CO3_HUMAN			FALSE
VLM(+15.99)SVLNDNSR	49.27	1262.63	11	2.4	632.326	2	12.1246	104000	315000	2623	20210526_HS_Frac2-3.raw	1		Oxidation (M)		FALSE
VLQGLLSPIFK	44.79	1213.74	11	0.5	607.881	2	26.2935	358000	4390000	6838	20210526_HS_Frac4-1.raw	7				FALSE
VLSALQAVQGLLVAQGR	53.12	1722.02	17	3.3	862.02	2	28.7953	39700	549000	7571	20210526_HS_Frac3-1.raw	1	P01019|ANGT_HUMAN			FALSE
VLSLAQE(+21.98)QVGGSPEK	46.34	1562.79	15	1.3	521.94	3	16.7459	453000	4100000	3636	20210526_HS_Frac3-2.raw	2		Sodium adduct	E7:Sodium adduct:13.94	FALSE
VLSLAQEQVGGSPE(+21.98)K	43.01	1562.79	15	0.6	521.94	3	16.7378	230000	2310000	3650	20210526_HS_Frac3-3.raw	1		Sodium adduct	E14:Sodium adduct:11.94	FALSE
VLSLAQEQVGGSPEK	69.4	1540.81	15	1.5	771.416	2	16.8547	9230000	106000000	3546	20210526_HS_Frac4-2.raw	20				FALSE
VM(+15.99)DKYTFELSR	42.33	1403.68	11	3.5	468.901	3	17.578	680000	5360000	3378	20210526_HS_Frac1-2.raw	4	P02774|VTDB_HUMAN;D6RF35|D6RF35_HUMAN	Oxidation (M)		FALSE
VM(+15.99)PIC(+57.02)LPSK	56.31	1059.55	9	-2.4	530.781	2	16.0772	94600000	613000000	3721	20210526_HS_Frac2-3.raw	24	P00738|HPT_HUMAN;A0A0A0MRD9|A0A0A0MRD9_HUMAN;J3QLC9|J3QLC9_HUMAN;H3BS21|H3BS21_HUMAN;A0A087WU08|A0A087WU08_HUMAN;H0Y300|H0Y300_HUMAN;A0A0C4DGL8|A0A0C4DGL8_HUMAN;J3QR68|J3QR68_HUMAN;P00739|HPTR_HUMAN	Oxidation (M); Carbamidomethylation	C5:Carbamidomethylation:1000.00	FALSE
VM(+15.99)PIC(+57.02)LPSKDYAEVGR	49.66	1849.91	16	2.8	617.647	3	19.6209	7540000	67500000	5046	20210526_HS_Frac2-3.raw	6	P00738|HPT_HUMAN;J3QLC9|J3QLC9_HUMAN;H3BS21|H3BS21_HUMAN;A0A087WU08|A0A087WU08_HUMAN;H0Y300|H0Y300_HUMAN;A0A0C4DGL8|A0A0C4DGL8_HUMAN;J3QR68|J3QR68_HUMAN	Oxidation (M); Carbamidomethylation	C5:Carbamidomethylation:1000.00	FALSE
VNIPLVTNEEC(+57.02)QK	51.03	1542.77	13	3.6	772.398	2	19.1581	267000	2420000	4437	20210526_HS_Frac3-1.raw	1	H0YAC1|H0YAC1_HUMAN;P03952|KLKB1_HUMAN	Carbamidomethylation	C11:Carbamidomethylation:1000.00	FALSE
VNQNLVYESGSLNFSK	55.86	1797.89	16	4.1	899.959	2	20.424	905000	11300000	4928	20210526_HS_Frac3-3.raw	4	P04114|APOB_HUMAN			FALSE
VNSFFSTFK	41.96	1075.53	9	4.6	538.779	2	21.1125	219000	3030000	5627	20210526_HS_Frac2-2.raw	2	P06727|APOA4_HUMAN			FALSE
VNVDEVGGEALGR	57.96	1313.66	13	1	657.839	2	16.205	10800000	166000000	3778	20210526_HS_Frac2-1.raw	12	F8W6P5|F8W6P5_HUMAN;P68871|HBB_HUMAN;A0A2R8Y7R2|A0A2R8Y7R2_HUMAN			FALSE
VPAPPSPQPATYTC(+57.02)VVSHEDSR	61.39	2394.13	22	0.4	799.053	3	18.5514	838000	11300000	4596	20210526_HS_Frac2-1.raw	6	A0A0A0MS09|A0A0A0MS09_HUMAN;P01880|IGHD_HUMAN	Carbamidomethylation	C14:Carbamidomethylation:1000.00	FALSE
VPFDAATLHTSTAM(+15.99)AAQHGM(+15.99)DDDGTGQK	46.78	2904.27	28	-0.2	969.099	3	17.3381	2130000	27800000	4155	20210526_HS_Frac2-1.raw	4	A0A0A0MS51|A0A0A0MS51_HUMAN;P06396|GELS_HUMAN;A0A0A0MT01|A0A0A0MT01_HUMAN	Oxidation (M); Oxidation (M)		FALSE
VPGTSTSATLTGLTR	50.19	1460.78	15	2.1	731.403	2	17.6648	97800	1950000	3967	20210526_HS_Frac3-3.raw	2	P02751|FINC_HUMAN;H0Y7Z1|H0Y7Z1_HUMAN			FALSE
VPQVSTPTLVE(+21.98)VSR	48.88	1532.82	14	-2.8	511.947	3	19.963	62800000	752000000	4747	20210526_HS_Frac3-2.raw	30	A0A0C4DGB6|A0A0C4DGB6_HUMAN;#CONTAM#cont|000097|;#CONTAM#cont|000035|;A0A087WWT3|A0A087WWT3_HUMAN;P02768|ALBU_HUMAN;#CONTAM#cont|000017|;C9JKR2|C9JKR2_HUMAN;D6RHD5|D6RHD5_HUMAN;B7WNR0|B7WNR0_HUMAN;H0YA55|H0YA55_HUMAN	Sodium adduct	E11:Sodium adduct:26.52	FALSE
VPQVSTPTLVEVSR	72.9	1510.84	14	4	756.431	2	20.0207	135000000	1150000000	4609	20210526_HS_Frac4-1.raw	167	A0A0C4DGB6|A0A0C4DGB6_HUMAN;#CONTAM#cont|000097|;#CONTAM#cont|000035|;A0A087WWT3|A0A087WWT3_HUMAN;P02768|ALBU_HUMAN;#CONTAM#cont|000017|;C9JKR2|C9JKR2_HUMAN;D6RHD5|D6RHD5_HUMAN;B7WNR0|B7WNR0_HUMAN;H0YA55|H0YA55_HUMAN			FALSE
VPTGGVEEGLLER	54.3	1354.71	13	0.8	678.365	2	18.3131	2030000	19600000	4157	20210526_HS_Frac3-2.raw	3	A0A0A0MS09|A0A0A0MS09_HUMAN;P01880|IGHD_HUMAN			FALSE
VPVAVQ(+0.98)GE(+21.98)DTVQSLTQGDGVAK	31.95	2220.09	22	6.7	556.035	4	20.5459			4864	20210526_HS_Frac4-2.raw	1	P01024|CO3_HUMAN	Deamidation (NQ); Sodium adduct	Q6:Deamidation (NQ):0.00;E8:Sodium adduct:0.00	FALSE
VPVAVQGE(+21.98)DTVQSLTQGD(+21.98)GVAK	46.03	2241.09	22	1.5	748.04	3	20.5409	163000	2110000	4856	20210526_HS_Frac4-2.raw	1	P01024|CO3_HUMAN	Sodium adduct; Sodium adduct	E8:Sodium adduct:0.00;D18:Sodium adduct:17.67	FALSE
VPVAVQGE(+21.98)DTVQSLTQGDGVAK	53.79	2219.1	22	2.9	1110.57	2	20.5388	239000	2940000	4855	20210526_HS_Frac4-2.raw	3	P01024|CO3_HUMAN	Sodium adduct	E8:Sodium adduct:0.00	FALSE
VPVAVQGED(+21.98)TVQ(+0.98)SLTQGDGVAK	36.99	2220.09	22	5.8	556.035	4	20.5626	141000	1710000	4823	20210526_HS_Frac4-3.raw	2	P01024|CO3_HUMAN	Sodium adduct; Deamidation (NQ)	D9:Sodium adduct:0.00;Q12:Deamidation (NQ):2.36	FALSE
VPVAVQGED(+21.98)TVQSLTQGD(+21.98)GVAK	58.58	2241.09	22	2.4	748.041	3	20.6277	300000	4130000	4827	20210526_HS_Frac4-1.raw	2	P01024|CO3_HUMAN	Sodium adduct; Sodium adduct	D9:Sodium adduct:0.00;D18:Sodium adduct:19.86	FALSE
VPVAVQGED(+21.98)TVQSLTQGDGVAK	69.04	2219.1	22	-5.5	740.707	3	20.2399	1170000	17300000	4694	20210526_HS_Frac4-1.raw	11	P01024|CO3_HUMAN	Sodium adduct	D9:Sodium adduct:0.00	FALSE
VPVAVQGEDTVQ(+0.98)SLTQ(+0.98)GDGVAK	51.74	2199.09	22	9.3	734.047	3	20.8834	38000	1180000	4937	20210526_HS_Frac4-1.raw	1	P01024|CO3_HUMAN	Deamidation (NQ); Deamidation (NQ)	Q12:Deamidation (NQ):33.98;Q16:Deamidation (NQ):37.01	FALSE
VPVAVQGEDTVQ(+0.98)SLTQGDGVAK	40.13	2198.11	22	8.9	733.719	3	19.1883	64800	427000	4369	20210526_HS_Frac4-2.raw	1	P01024|CO3_HUMAN	Deamidation (NQ)	Q12:Deamidation (NQ):14.32	FALSE
VPVAVQGEDTVQSLTQGD(+21.98)GVAK	53.69	2219.1	22	1.7	1110.57	2	20.5653	190000	2760000	4816	20210526_HS_Frac4-3.raw	1	P01024|CO3_HUMAN	Sodium adduct	D18:Sodium adduct:6.76	FALSE
VPVAVQGEDTVQSLTQGDGVAK	81.11	2197.12	22	-3.3	733.379	3	20.6862	41500000	548000000	3519	20210526_HS_Frac5-3.raw	43	P01024|CO3_HUMAN			FALSE
VQALEEANNDLENK	55.99	1585.76	14	1.4	793.89	2	14.4523	1640000	8330000	2979	20210526_HS_Frac3-2.raw	4	P35527|K1C9_HUMAN			FALSE
VQEAHLTEDQIFYFPK	59.33	1963.97	16	0.6	655.666	3	23.6299	590000	6890000	6582	20210526_HS_Frac2-2.raw	3	P07360|CO8G_HUMAN			FALSE
VQFELHYQEVK	47.51	1418.72	11	1.5	473.914	3	19.2598	2050000	23000000	3718	20210526_HS_Frac1-1.raw	11	#CONTAM#cont|000108|;Q5T985|Q5T985_HUMAN;Q5T987|Q5T987_HUMAN;P19823|ITIH2_HUMAN			FALSE
VQPYLDDFQK	54.34	1251.61	10	-6.3	626.813	2	17.6383	56700000	308000000	4284	20210526_HS_Frac2-3.raw	20	F8W696|F8W696_HUMAN;P02647|APOA1_HUMAN			FALSE
VQPYLDDFQKK	47.87	1379.71	11	2.8	460.911	3	16.404	246000	2140000	3031	20210526_HS_Frac1-1.raw	4	F8W696|F8W696_HUMAN;P02647|APOA1_HUMAN			FALSE
VQSTELC(+57.02)AGHLAGGTDSC(+57.02)Q(+0.98)GDSGGPLVC(+57.02)FEK	61.48	3237.4	31	8	1080.15	3	21.747			5428	20210526_HS_Frac3-3.raw	1	P00747|PLMN_HUMAN	Carbamidomethylation; Carbamidomethylation; Deamidation (NQ); Carbamidomethylation	C7:Carbamidomethylation:1000.00;C18:Carbamidomethylation:1000.00;Q19:Deamidation (NQ):8.30;C28:Carbamidomethylation:1000.00	FALSE
VQSTELC(+57.02)AGHLAGGTDSC(+57.02)QGDSGGPLVC(+57.02)FEK	59.39	3236.42	31	6.6	1079.82	3	21.7546	178000	5090000	5434	20210526_HS_Frac3-3.raw	3	P00747|PLMN_HUMAN	Carbamidomethylation; Carbamidomethylation; Carbamidomethylation	C7:Carbamidomethylation:1000.00;C18:Carbamidomethylation:1000.00;C28:Carbamidomethylation:1000.00	FALSE
VQWKVDNALQSGNSQESVTEQDSK	54.33	2676.26	24	4.2	893.102	3	18.3292	286000	4570000	4527	20210526_HS_Frac2-1.raw	5	A0A5H1ZRQ3|A0A5H1ZRQ3_HUMAN;P01834|IGKC_HUMAN			FALSE
VSALLTPAEQTGTWK	25.89	1600.85	15	3.7	801.436	2	20.424	1020000	10800000	4989	20210526_HS_Frac3-3.raw	1	P04114|APOB_HUMAN			FALSE
VSEADSSNADWVTK	47.19	1507.68	14	3.1	754.852	2	10.0261	1640000	2380000	2092	20210526_HS_Frac3-2.raw	3	E7ETN3|E7ETN3_HUMAN;P00751|CFAB_HUMAN;A0A0G2JH38|A0A0G2JH38_HUMAN;B4E1Z4|B4E1Z4_HUMAN			FALSE
VSFLSALEEYTK	61.63	1385.71	12	0.9	693.862	2	26.7222	21500000	207000000	5008	20210526_HS_Frac5-1.raw	15	F8W696|F8W696_HUMAN;P02647|APOA1_HUMAN			FALSE
VSITSITVENVFVK	45.38	1534.86	14	0.1	768.44	2	25.2927	35900	558000	6624	20210526_HS_Frac3-1.raw	1	P01031|CO5_HUMAN			FALSE
VSTAFVYTK	48.95	1014.54	9	-1.5	508.278	2	14.2076	4420000	11600000	3166	20210526_HS_Frac2-3.raw	3	P04114|APOB_HUMAN			FALSE
VSVFVPPR	63.34	899.523	8	0.7	450.771	2	16.9649	17700000	117000000	3710	20210526_HS_Frac3-2.raw	12	P01871|IGHM_HUMAN			FALSE
VSVQLE(+21.98)ASPAFLAVPVEK	46.34	1905.02	18	-0.5	636.017	3	25.6978	338000	4690000	6696	20210526_HS_Frac4-2.raw	4	P01023|A2MG_HUMAN	Sodium adduct	E6:Sodium adduct:81.27	FALSE
VSVQLEASPAFLAVPVEK	62.07	1883.04	18	1.8	942.533	2	25.7907	5650000	64600000	6650	20210526_HS_Frac4-1.raw	14	P01023|A2MG_HUMAN			FALSE
VTAAPQSVC(+57.02)ALR	57.24	1271.67	12	-6.5	636.838	2	14.717	25400000	126000000	3040	20210526_HS_Frac3-3.raw	16	P01023|A2MG_HUMAN	Carbamidomethylation	C9:Carbamidomethylation:1000.00	FALSE
VTASDPLDTLGSEGALSPGGVASLLR	37.95	2482.29	26	1.7	1242.16	2	28.5817	126000	1640000	7430	20210526_HS_Frac4-1.raw	2				FALSE
VTEPISAESGEQVER	49.71	1629.78	15	4.3	815.906	2	12.7075	1230000	4870000	2569	20210526_HS_Frac3-3.raw	5				FALSE
VTGEGC(+57.02)VYLQTSLK	64.71	1553.78	14	-2.5	777.896	2	18.6969	2060000	27600000	4301	20210526_HS_Frac3-3.raw	10	P01023|A2MG_HUMAN	Carbamidomethylation	C6:Carbamidomethylation:1000.00	FALSE
VTLTC(+57.02)VAPLSGVDFQLR	57.75	1874.99	17	2.8	626.009	3	26.5857	772000	10500000	6998	20210526_HS_Frac3-2.raw	5	P04217|A1BG_HUMAN;M0R009|M0R009_HUMAN	Carbamidomethylation	C5:Carbamidomethylation:1000.00	FALSE
VTSIQD(+21.98)WVQK	47.45	1224.61	10	0.5	613.316	2	18.3442	925000	15000000	4548	20210526_HS_Frac2-3.raw	4	P00738|HPT_HUMAN;J3QLC9|J3QLC9_HUMAN;A0A087WU08|A0A087WU08_HUMAN;H0Y300|H0Y300_HUMAN;A0A0C4DGL8|A0A0C4DGL8_HUMAN;J3QR68|J3QR68_HUMAN	Sodium adduct	D6:Sodium adduct:47.31	FALSE
VTSIQDWVQK	52.3	1202.63	10	1.3	602.325	2	18.4541	64400000	424000000	4049	20210526_HS_Frac4-3.raw	27	P00738|HPT_HUMAN;J3QLC9|J3QLC9_HUMAN;A0A087WU08|A0A087WU08_HUMAN;H0Y300|H0Y300_HUMAN;A0A0C4DGL8|A0A0C4DGL8_HUMAN;J3QR68|J3QR68_HUMAN			FALSE
VTTSQDM(+15.99)LSIM(+15.99)EK	53.35	1513.7	13	-0.2	757.86	2	12.09	6230000	18600000	2527	20210526_HS_Frac3-3.raw	8	H9KV48|H9KV48_HUMAN;P05155|IC1_HUMAN;E9PGN7|E9PGN7_HUMAN	Oxidation (M); Oxidation (M)		FALSE
VTTVASHTSDSDVPSGVTEVVVK	65.74	2313.17	23	-0.7	772.067	3	18.7599	10900000	129000000	4713	20210526_HS_Frac2-3.raw	11	H0YAS8|H0YAS8_HUMAN;P10909|CLUS_HUMAN;H0YC35|H0YC35_HUMAN			FALSE
VTVLGQPK	41.59	840.507	8	-1.4	421.262	2	6.8047	2870000	7830000	1499	20210526_HS_Frac2-3.raw	6	A0A0B4J231|A0A0B4J231_HUMAN;B9A064|IGLL5_HUMAN			FALSE
VVAEGFDFAN(+0.98)GINISPDGK	66.63	1949.94	19	1.5	975.981	2	24.1677	841000	11600000	6146	20210526_HS_Frac4-1.raw	3	P27169|PON1_HUMAN	Deamidation (NQ)	N10:Deamidation (NQ):38.16	FALSE
VVAGVANALAHK	50.93	1148.67	12	4.7	575.343	2	14.0365	106000	720000	2539	20210526_HS_Frac1-2.raw	2	P02042|HBD_HUMAN;P68871|HBB_HUMAN			FALSE
VVAQGVGIPEDSIFTM(+15.99)ADR	64.62	2019.99	19	-2.8	674.339	3	23.1295	2150000	25000000	5770	20210526_HS_Frac4-1.raw	11	P02760|AMBP_HUMAN;S4R471|S4R471_HUMAN;S4R3Y4|S4R3Y4_HUMAN	Oxidation (M)		FALSE
VVGGLVALR	43.94	882.565	9	-0.5	442.291	2	17.8227	797000	6310000	4367	20210526_HS_Frac2-2.raw	3				FALSE
VVLHPNYSQVDIGLIK	72.07	1794	16	0.9	599.012	3	22.8241	5770000	58400000	6288	20210526_HS_Frac2-3.raw	10	P00738|HPT_HUMAN;J3QLC9|J3QLC9_HUMAN;H3BS21|H3BS21_HUMAN;A0A087WU08|A0A087WU08_HUMAN;H0Y300|H0Y300_HUMAN;A0A0C4DGL8|A0A0C4DGL8_HUMAN;J3QR68|J3QR68_HUMAN			FALSE
VVNNSPQPQNVVFDVQIPK	71.19	2121.12	19	0.7	1061.57	2	23.652	1280000	22400000	5962	20210526_HS_Frac4-3.raw	10	Q5T985|Q5T985_HUMAN;Q5T987|Q5T987_HUMAN;P19823|ITIH2_HUMAN			FALSE
VVSVLTVLHQDWLN(+0.98)GK	68.3	1807.98	16	1.6	905.004	2	27.3753	19700000	152000000	7741	20210526_HS_Frac2-3.raw	18	A0A4W9A917|A0A4W9A917_HUMAN;P01857|IGHG1_HUMAN;P01861|IGHG4_HUMAN;P01860|IGHG3_HUMAN;A0A0A0MS08|A0A0A0MS08_HUMAN;A0A286YFJ8|A0A286YFJ8_HUMAN;A0A286YES1|A0A286YES1_HUMAN	Deamidation (NQ)	N14:Deamidation (NQ):61.69	FALSE
VVSVLTVVHQ(+0.98)DWLNGK	45.82	1793.97	16	3.2	897.997	2	25.4654	381000	3660000	7191	20210526_HS_Frac2-2.raw	2	P01859|IGHG2_HUMAN;A0A286YEY4|A0A286YEY4_HUMAN	Deamidation (NQ)	Q10:Deamidation (NQ):21.87	FALSE
VVSVLTVVHQDWLN(+0.98)GK	76.04	1793.97	16	2	897.996	2	25.2851	26000000	235000000	7116	20210526_HS_Frac2-1.raw	17	P01859|IGHG2_HUMAN;A0A286YEY4|A0A286YEY4_HUMAN	Deamidation (NQ)	N14:Deamidation (NQ):97.69	FALSE
VWVYPPEK	47.09	1016.53	8	-5.2	509.273	2	14.747	127000000	204000000	4054	20210526_HS_Frac2-2.raw	10	P02790|HEMO_HUMAN;Q9BS19|Q9BS19_HUMAN			FALSE
VYAC(+57.02)E(+21.98)VTHQGLSSPVTK	67.6	1896.9	17	0.4	633.311	3	16.2506	3230000	27300000	3826	20210526_HS_Frac2-2.raw	4	A0A5H1ZRQ3|A0A5H1ZRQ3_HUMAN;P01834|IGKC_HUMAN	Carbamidomethylation; Sodium adduct	C4:Carbamidomethylation:1000.00;E5:Sodium adduct:105.75	FALSE
VYAC(+57.02)EVTHQ(+0.98)GLSSPVTK	48.57	1875.9	17	5.3	626.314	3	17.0875	5980000	16600000	3984	20210526_HS_Frac2-1.raw	2	A0A5H1ZRQ3|A0A5H1ZRQ3_HUMAN;P01834|IGKC_HUMAN	Carbamidomethylation; Deamidation (NQ)	C4:Carbamidomethylation:1000.00	FALSE
VYAC(+57.02)EVTHQGLSSPVTK	77.96	1874.92	17	-0.2	938.471	2	16.3063	98400000	892000000	3881	20210526_HS_Frac2-3.raw	43	A0A5H1ZRQ3|A0A5H1ZRQ3_HUMAN;P01834|IGKC_HUMAN	Carbamidomethylation	C4:Carbamidomethylation:1000.00	FALSE
VYAYYN(+0.98)LEESC(+57.02)TR	38.09	1667.71	13	2	834.869	2	17.7498	18600	323000	3996	20210526_HS_Frac3-2.raw	1	P01024|CO3_HUMAN	Deamidation (NQ); Carbamidomethylation	C11:Carbamidomethylation:1000.00	FALSE
VYAYYNLE(+21.98)ESC(+57.02)TR	47.47	1688.71	13	2.9	563.915	3	18.3331	448000	5240000	4173	20210526_HS_Frac3-2.raw	3	P01024|CO3_HUMAN	Sodium adduct; Carbamidomethylation	E8:Sodium adduct:17.01;C11:Carbamidomethylation:1000.00	FALSE
VYAYYNLEESC(+57.02)TR	66.33	1666.73	13	3.9	834.378	2	18.3331	7340000	90300000	4164	20210526_HS_Frac3-2.raw	12	P01024|CO3_HUMAN	Carbamidomethylation	C11:Carbamidomethylation:1000.00	FALSE
WELLQQVDTSTR	57.37	1474.74	12	3.4	738.383	2	21.528	851000	9400000	5319	20210526_HS_Frac3-3.raw	3	#CONTAM#cont|000132|;#CONTAM#cont|000135|;#CONTAM#cont|000134|;P04264|K2C1_HUMAN			FALSE
WFYIASAFR	51.75	1159.58	9	1.7	580.801	2	25.6447			7243	20210526_HS_Frac2-2.raw	5	P02763|A1AG1_HUMAN;P19652|A1AG2_HUMAN			FALSE
WLQGSQELPR	52.73	1212.63	10	-1.6	607.321	2	17.0257	9580000	67700000	4100	20210526_HS_Frac2-2.raw	6	P01876|IGHA1_HUMAN;A0A286YEY1|A0A286YEY1_HUMAN			FALSE
WQSIPLC(+57.02)VEK	36.96	1258.64	10	2.5	630.33	2	20.7794	347000	3690000	5062	20210526_HS_Frac3-2.raw	5	P08603|CFAH_HUMAN	Carbamidomethylation	C7:Carbamidomethylation:1000.00	FALSE
WSAGLTSSQVDLYIPK	36.26	1763.91	16	5.1	882.969	2	24.5084	80100	1150000	6373	20210526_HS_Frac3-1.raw	1	P08185|CBG_HUMAN			FALSE
WTPYQGC(+57.02)EALC(+57.02)C(+57.02)PEPK	50.18	1994.83	16	2	998.429	2	19.6664	109000	2410000	4684	20210526_HS_Frac3-3.raw	3	P04003|C4BPA_HUMAN	Carbamidomethylation; Carbamidomethylation; Carbamidomethylation	C7:Carbamidomethylation:1000.00;C11:Carbamidomethylation:1000.00;C12:Carbamidomethylation:1000.00	FALSE
WYVDGVEVHNAK	59.83	1415.68	12	2.6	472.903	3	17.8538	204000	1840000	3455	20210526_HS_Frac1-2.raw	2	A0A4W9A917|A0A4W9A917_HUMAN;P01860|IGHG3_HUMAN;A0A286YES1|A0A286YES1_HUMAN			FALSE
YAASSYLSLTPE(+21.98)QWK	40.14	1764.83	15	1.5	589.288	3	23.531	847000	16600000	6061	20210526_HS_Frac3-2.raw	4	P0DOY2|IGLC2_HUMAN;A0A0B4J231|A0A0B4J231_HUMAN;P0DOY3|IGLC3_HUMAN;B9A064|IGLL5_HUMAN	Sodium adduct	E12:Sodium adduct:20.75	FALSE
YAASSYLSLTPEQWK	73.51	1742.85	15	1.4	872.437	2	23.6197	26100000	274000000	5938	20210526_HS_Frac4-1.raw	52	P0DOY2|IGLC2_HUMAN;A0A0B4J231|A0A0B4J231_HUMAN;P0DOY3|IGLC3_HUMAN;B9A064|IGLL5_HUMAN			FALSE
YAATSQVLLPSK	63.96	1276.7	12	0	639.361	2	16.9329	11500000	126000000	4040	20210526_HS_Frac2-3.raw	15	P01871|IGHM_HUMAN			FALSE
YDVENC(+57.02)LANK	61.23	1224.54	10	-0.8	613.282	2	11.5063	12300000	69200000	2561	20210526_HS_Frac2-3.raw	16	P01023|A2MG_HUMAN	Carbamidomethylation	C6:Carbamidomethylation:1000.00	FALSE
YEDGTLSLTSTSDLQSGIIK	62.49	2127.06	20	0.3	1064.54	2	23.0115	411000	5060000	5720	20210526_HS_Frac4-1.raw	3	P04114|APOB_HUMAN			FALSE
YEELQITAGR	49.45	1178.59	10	-0.4	590.306	2	15.3896	7730000	33400000	3495	20210526_HS_Frac2-1.raw	9	#CONTAM#cont|000132|;#CONTAM#cont|000135|;#CONTAM#cont|000134|;P04264|K2C1_HUMAN			FALSE
YEELQVTVGR	46.25	1192.61	10	0.5	597.314	2	16.6665	296000	1340000	3575	20210526_HS_Frac3-1.raw	1	P35908|K22E_HUMAN			FALSE
YEFLN(+0.98)GR	44.8	898.418	7	-0.6	450.218	2	14.1931	3190000	10900000	3166	20210526_HS_Frac2-1.raw	13	P00747|PLMN_HUMAN	Deamidation (NQ)		FALSE
YEITTIHNLFR	53.65	1405.74	11	2.8	469.587	3	22.7133	1030000	10500000	4568	20210526_HS_Frac1-1.raw	6	P05546|HEP2_HUMAN			FALSE
YENYELTLK	53.94	1171.58	9	1.6	586.799	2	17.6586	4380000	34500000	4310	20210526_HS_Frac2-3.raw	5	P04114|APOB_HUMAN			FALSE
YEVDQQIQVLM(+15.99)DK	53.84	1623.78	13	2.5	812.903	2	19.3744	1470000	11100000	4554	20210526_HS_Frac3-2.raw	3	P04114|APOB_HUMAN	Oxidation (M)		FALSE
YFIDFVAR	54.99	1029.53	8	2.3	515.775	2	22.5459	4990000	71800000	6169	20210526_HS_Frac2-2.raw	7	P01042|KNG1_HUMAN			FALSE
YGAATFTR	42.37	885.434	8	-1	443.726	2	6.3827	2490000	10500000	1429	20210526_HS_Frac2-2.raw	8	P01023|A2MG_HUMAN;P20742|PZP_HUMAN			FALSE
YGLVTYATYPK	58.49	1274.65	11	0.9	638.337	2	19.4302	1360000	16100000	4389	20210526_HS_Frac4-1.raw	4	E7ETN3|E7ETN3_HUMAN;P00751|CFAB_HUMAN;A0A0G2JH38|A0A0G2JH38_HUMAN;B4E1Z4|B4E1Z4_HUMAN			FALSE
YGM(+15.99)VAQVTQTLK	64.54	1353.7	12	-1	677.857	2	16.34	4160000	20900000	3478	20210526_HS_Frac3-3.raw	6	A8MUN2|A8MUN2_HUMAN;P04114|APOB_HUMAN	Oxidation (M)		FALSE
YGQTIRPIC(+57.02)LPC(+57.02)TEGTTR	66.73	2122.03	18	1.8	708.355	3	20.0861	956000	13800000	5242	20210526_HS_Frac2-3.raw	3	H7C5H1|H7C5H1_HUMAN;E7ETN3|E7ETN3_HUMAN;P00751|CFAB_HUMAN;B4E1Z4|B4E1Z4_HUMAN	Carbamidomethylation; Carbamidomethylation	C9:Carbamidomethylation:1000.00;C12:Carbamidomethylation:1000.00	FALSE
YIC(+57.02)E(+21.98)NQDSISSK	37.68	1464.62	12	-8.6	733.312	2	5.3958	2090000	2710000	1020	20210526_HS_Frac2-2.raw	3	A0A0C4DGB6|A0A0C4DGB6_HUMAN;P02768|ALBU_HUMAN;C9JKR2|C9JKR2_HUMAN;D6RHD5|D6RHD5_HUMAN;B7WNR0|B7WNR0_HUMAN;H0YA55|H0YA55_HUMAN	Carbamidomethylation; Sodium adduct	C3:Carbamidomethylation:1000.00;E4:Sodium adduct:0.00	FALSE
YIC(+57.02)EN(+0.98)QDSISSK	44.69	1443.62	12	6.1	722.823	2	5.9452	53300000	6130000	1231	20210526_HS_Frac2-1.raw	5	A0A0C4DGB6|A0A0C4DGB6_HUMAN;P02768|ALBU_HUMAN;C9JKR2|C9JKR2_HUMAN;D6RHD5|D6RHD5_HUMAN;B7WNR0|B7WNR0_HUMAN;H0YA55|H0YA55_HUMAN	Carbamidomethylation; Deamidation (NQ)	C3:Carbamidomethylation:1000.00;N5:Deamidation (NQ):12.28	FALSE
YIC(+57.02)ENQ(+0.98)DSISSK	33.62	1443.62	12	9.9	722.826	2	15.473			3555	20210526_HS_Frac2-1.raw	1	A0A0C4DGB6|A0A0C4DGB6_HUMAN;P02768|ALBU_HUMAN;C9JKR2|C9JKR2_HUMAN;D6RHD5|D6RHD5_HUMAN;B7WNR0|B7WNR0_HUMAN;H0YA55|H0YA55_HUMAN	Carbamidomethylation; Deamidation (NQ)	C3:Carbamidomethylation:1000.00;Q6:Deamidation (NQ):0.00	FALSE
YIC(+57.02)ENQD(+21.98)SISSK	53.71	1464.62	12	-1.4	733.317	2	6.2609	46700000	173000000	1304	20210526_HS_Frac3-3.raw	20	A0A0C4DGB6|A0A0C4DGB6_HUMAN;P02768|ALBU_HUMAN;C9JKR2|C9JKR2_HUMAN;D6RHD5|D6RHD5_HUMAN;B7WNR0|B7WNR0_HUMAN;H0YA55|H0YA55_HUMAN	Carbamidomethylation; Sodium adduct	C3:Carbamidomethylation:1000.00;D7:Sodium adduct:32.97	FALSE
YIC(+57.02)ENQDSISSK	57.73	1442.63	12	0.8	722.328	2	15.3451	574000000	2590000000	3225	20210526_HS_Frac3-3.raw	182	A0A0C4DGB6|A0A0C4DGB6_HUMAN;P02768|ALBU_HUMAN;C9JKR2|C9JKR2_HUMAN;D6RHD5|D6RHD5_HUMAN;B7WNR0|B7WNR0_HUMAN;H0YA55|H0YA55_HUMAN	Carbamidomethylation	C3:Carbamidomethylation:1000.00	FALSE
YIYGKPVQGVAYVR	54.76	1611.88	14	3.2	538.303	3	18.4688	1420000	15600000	4576	20210526_HS_Frac2-1.raw	6				FALSE
YLGEEYVK	54.41	999.491	8	-3.9	500.753	2	14.2798	144000000	698000000	3310	20210526_HS_Frac2-3.raw	27	P02787|TRFE_HUMAN			FALSE
YLTWASR	49.85	895.455	7	-1.5	448.736	2	15.0795	25200000	149000000	3825	20210526_HS_Frac2-3.raw	31	P01876|IGHA1_HUMAN;A0A286YEY1|A0A286YEY1_HUMAN			FALSE
YLYEIAR	54.85	926.486	7	-1.3	464.252	2	17.6334	678000000	3040000000	4043	20210526_HS_Frac2-3.raw	312	A0A0C4DGB6|A0A0C4DGB6_HUMAN;#CONTAM#cont|000097|;#CONTAM#cont|000035|;P02768|ALBU_HUMAN;H7C013|H7C013_HUMAN;#CONTAM#cont|000017|;H0YA55|H0YA55_HUMAN			FALSE
YNALDLTNN(+0.98)GK	59.29	1222.58	11	0.6	612.301	2	14.3142	4590000	15600000	2922	20210526_HS_Frac3-3.raw	8	P04114|APOB_HUMAN	Deamidation (NQ)	N9:Deamidation (NQ):10.11	FALSE
YNSQNQSN(+0.98)NQFVLYR	54.28	1874.85	15	1.3	938.439	2	18.0877	35600	559000	4065	20210526_HS_Frac3-1.raw	2	P01042|KNG1_HUMAN	Deamidation (NQ)	N8:Deamidation (NQ):17.01	FALSE
YNSQNQSNN(+0.98)QFVLYR	60.55	1874.85	15	0.5	938.438	2	18.1667	50600	765000	4120	20210526_HS_Frac3-2.raw	1	P01042|KNG1_HUMAN	Deamidation (NQ)	N9:Deamidation (NQ):12.28	FALSE
YNSQNQSNNQ(+0.98)FVLYR	46.78	1874.85	15	3.9	938.442	2	18.1386	44400	480000	4127	20210526_HS_Frac3-3.raw	3	P01042|KNG1_HUMAN	Deamidation (NQ)	Q10:Deamidation (NQ):9.74	FALSE
YNSQNQSNNQFVLYR	67.61	1873.87	15	2.1	937.948	2	18.2855	2990000	21700000	4156	20210526_HS_Frac3-2.raw	10	P01042|KNG1_HUMAN			FALSE
YPLYVLK	36.98	894.521	7	-2.9	448.269	2	19.4422	59600	1120000	4998	20210526_HS_Frac2-2.raw	1	A0A087WSY5|A0A087WSY5_HUMAN;Q96IY4|CBPB2_HUMAN			FALSE
YSLTYIYTGLSK	55.92	1407.73	12	-3	704.872	2	23.0132	1290000	15600000	5871	20210526_HS_Frac3-2.raw	4	C9JEV0|C9JEV0_HUMAN;P25311|ZA2G_HUMAN			FALSE
YSPSFQGQVTISADK	65.45	1626.79	15	2.7	814.407	2	18.3377	791000	7680000	4193	20210526_HS_Frac3-3.raw	3	A0A0C4DH38|HV551_HUMAN			FALSE
YSSDYFQAPSDYR	44.08	1597.67	13	-2.8	799.842	2	18.3043	24900	443000	4180	20210526_HS_Frac3-3.raw	1				FALSE
YTC(+57.02)LPGYVR	51.74	1127.54	9	3.6	564.783	2	16.3691	3440000	21800000	3854	20210526_HS_Frac2-3.raw	5	P04003|C4BPA_HUMAN	Carbamidomethylation	C3:Carbamidomethylation:1000.00	FALSE
YTFELSR	45.98	914.45	7	-0.1	458.234	2	16.8578	12900000	158000000	4010	20210526_HS_Frac2-3.raw	10	P02774|VTDB_HUMAN;D6RF35|D6RF35_HUMAN			FALSE
YTIAALLSPYSYSTTAVVTNPK	65.33	2359.23	22	-0.4	787.42	3	27.5213	153000	2010000	7178	20210526_HS_Frac4-1.raw	2	P02766|TTHY_HUMAN;A0A087WT59|A0A087WT59_HUMAN			FALSE
YTYNYEAESSSGVPGTADSR	79.39	2152.92	20	-0.4	1077.47	2	16.4149	1230000	11100000	3374	20210526_HS_Frac4-1.raw	3	A8MUN2|A8MUN2_HUMAN;A0A669KB70|A0A669KB70_HUMAN;P04114|APOB_HUMAN			FALSE
YVLPNFEVK	58.22	1107.6	9	1.8	554.809	2	21.7393	6340000	53300000	5867	20210526_HS_Frac2-3.raw	10				FALSE
YVLSPYK	51.08	868.469	7	-2	435.243	2	13.5625	72500	401000	2981	20210526_HS_Frac2-3.raw	1	P01031|CO5_HUMAN			FALSE
YVM(+15.99)LPVAD(+21.98)QDQC(+57.02)IR	60.21	1744.79	14	3.6	582.608	3	19.5079	7130000	57900000	4618	20210526_HS_Frac3-3.raw	10	P00738|HPT_HUMAN;J3QLC9|J3QLC9_HUMAN;H3BS21|H3BS21_HUMAN;A0A087WU08|A0A087WU08_HUMAN;H0Y300|H0Y300_HUMAN;A0A0C4DGL8|A0A0C4DGL8_HUMAN;J3QR68|J3QR68_HUMAN	Oxidation (M); Sodium adduct; Carbamidomethylation	M3:Oxidation (M):1000.00;D8:Sodium adduct:26.31;C12:Carbamidomethylation:1000.00	FALSE
YVM(+15.99)LPVADQDQC(+57.02)IR	69.38	1722.81	14	2.8	862.416	2	19.5331	56000000	665000000	4434	20210526_HS_Frac4-1.raw	58	P00738|HPT_HUMAN;J3QLC9|J3QLC9_HUMAN;H3BS21|H3BS21_HUMAN;A0A087WU08|A0A087WU08_HUMAN;H0Y300|H0Y300_HUMAN;A0A0C4DGL8|A0A0C4DGL8_HUMAN;J3QR68|J3QR68_HUMAN	Oxidation (M); Carbamidomethylation	C12:Carbamidomethylation:1000.00	FALSE
YVM(+15.99)LPVADQYDC(+57.02)ITHYEGSTC(+57.02)PK	44.7	2762.2	23	0.7	921.746	3	22.7074	274000	4480000	6253	20210526_HS_Frac2-3.raw	5	A0A0A0MRD9|A0A0A0MRD9_HUMAN;P00739|HPTR_HUMAN	Oxidation (M); Carbamidomethylation; Carbamidomethylation	C12:Carbamidomethylation:1000.00;C21:Carbamidomethylation:1000.00	FALSE
YVTSAPM(+15.99)PEPQAPGR	61.8	1615.77	15	1.1	808.894	2	12.9475	33400000	120000000	2748	20210526_HS_Frac3-3.raw	30	P01871|IGHM_HUMAN	Oxidation (M)		FALSE
YWGVASFLQK	55.93	1197.62	10	4.5	599.821	2	24.2862	2900000	25000000	6300	20210526_HS_Frac3-3.raw	6	Q5VY30|Q5VY30_HUMAN;P02753|RET4_HUMAN			FALSE
YYC(+57.02)FQGN(+0.98)QFLR	53.54	1495.66	11	3.6	748.84	2	20.9072	10400	442000	5112	20210526_HS_Frac3-2.raw	3	P02790|HEMO_HUMAN;Q9BS19|Q9BS19_HUMAN	Carbamidomethylation; Deamidation (NQ)	C3:Carbamidomethylation:1000.00;N7:Deamidation (NQ):17.01	FALSE
YYC(+57.02)FQGNQFLR	61.25	1494.67	11	2.7	748.347	2	21.3912	7090000	64800000	5696	20210526_HS_Frac2-1.raw	12	P02790|HEMO_HUMAN;Q9BS19|Q9BS19_HUMAN	Carbamidomethylation	C3:Carbamidomethylation:1000.00	FALSE
YYQENFC(+57.02)EQIC(+57.02)SK	47.42	1767.72	13	2.3	884.874	2	17.4877			3861	20210526_HS_Frac3-1.raw	1	P13671|CO6_HUMAN	Carbamidomethylation; Carbamidomethylation	C7:Carbamidomethylation:1000.00;C11:Carbamidomethylation:1000.00	FALSE
YYTYLIM(+15.99)NK	51.71	1223.59	9	2	612.806	2	17.743	13400000	80100000	4323	20210526_HS_Frac2-3.raw	10	P01024|CO3_HUMAN	Oxidation (M)		FALSE
