# Supplementary material for: Preparative capillary electrophoresis (CE) fractionation of protein digests improves protein and peptide identification in bottom-up proteomics
Source: Royal Society of Chemistry journal article supplement (doi:10.1039/d1ay02145a), 2022-01-01
Supplement: d1ay02145a4.xlsx [file d1ay02145a4.xlsx]

## Sheet: SI_Fractions_repB_peptides_and_
Peptide	-10LgP	Mass	Length	ppm	m/z	z	RT	Area B_Combined_Fractions	Intensity B_Combined_Fractions	Scan	Source File	#Spec	Accession	PTM	AScore	Decoy
AADDTWEPFASGK	67.23	1393.62	13	1.3	697.816	2	19.1247	19400000	129000000	3602	20210614_HS_50ng_F4-3.raw	16	P02766|TTHY_HUMAN;A0A087WT59|A0A087WT59_HUMAN			FALSE
AAFTE(+21.98)C(+57.02)C(+57.02)QAADK	56.22	1392.54	12	-6.9	697.273	2	6.0829	15000000	63100000	1052	20210614_HS_50ng_F3-3.raw	39	A0A0C4DGB6|A0A0C4DGB6_HUMAN;P02768|ALBU_HUMAN;D6RHD5|D6RHD5_HUMAN;B7WNR0|B7WNR0_HUMAN;H0YA55|H0YA55_HUMAN	Sodium adduct; Carbamidomethylation; Carbamidomethylation	E5:Sodium adduct:60.13;C6:Carbamidomethylation:1000.00;C7:Carbamidomethylation:1000.00	FALSE
AAFTEC(+57.02)C(+57.02)Q(+0.98)AADK	25.46	1371.54	12	6.5	686.783	2	7.4658	165000	1780000	1442	20210614_HS_50ng_F2-2.raw	1	A0A0C4DGB6|A0A0C4DGB6_HUMAN;P02768|ALBU_HUMAN;D6RHD5|D6RHD5_HUMAN;B7WNR0|B7WNR0_HUMAN;H0YA55|H0YA55_HUMAN	Carbamidomethylation; Carbamidomethylation; Deamidation (NQ)	C6:Carbamidomethylation:1000.00;C7:Carbamidomethylation:1000.00	FALSE
AAFTEC(+57.02)C(+57.02)QAADK	69.53	1370.56	12	-7	686.282	2	7.03	91700000	416000000	1633	20210614_HS_50ng_F2-2.raw	131	A0A0C4DGB6|A0A0C4DGB6_HUMAN;P02768|ALBU_HUMAN;D6RHD5|D6RHD5_HUMAN;B7WNR0|B7WNR0_HUMAN;H0YA55|H0YA55_HUMAN	Carbamidomethylation; Carbamidomethylation	C6:Carbamidomethylation:1000.00;C7:Carbamidomethylation:1000.00	FALSE
AAISGENAGLVR	55.79	1156.62	12	-0.2	579.317	2	9.435	4960000	23300000	1862	20210614_HS_50ng_F2-2.raw	6	P19827|ITIH1_HUMAN;F8WAS2|F8WAS2_HUMAN			FALSE
AAM(+15.99)VGM(+15.99)LANFLGFR	51.48	1528.75	14	0.5	765.384	2	26.1152	83100	651000	6316	20210614_HS_50ng_F3-1.raw	1	P01019|ANGT_HUMAN	Oxidation (M); Oxidation (M)		FALSE
AAPSVTLFPPSSE(+21.98)ELQANK	47.51	2006.99	19	-1.3	670.004	3	22.2213	9470000	34500000	5159	20210614_HS_50ng_F4-1.raw	6	P0DOY2|IGLC2_HUMAN;P0DOY3|IGLC3_HUMAN	Sodium adduct	E13:Sodium adduct:11.06	FALSE
AAPSVTLFPPSSEELQANK	59.02	1985.01	19	-0.3	993.512	2	22.3006	120000000	576000000	5121	20210614_HS_50ng_F4-1.raw	32	P0DOY2|IGLC2_HUMAN;P0DOY3|IGLC3_HUMAN			FALSE
AAQVTIQSSGTFSSK	73.63	1510.76	15	-0.1	756.389	2	10.0217	13700000	33400000	2293	20210614_HS_50ng_F3-1.raw	29	P01023|A2MG_HUMAN			FALSE
AATVGSLAGQPLQER	56.85	1496.79	15	3.1	749.407	2	17.5009	282000	2630000	3353	20210614_HS_50ng_F3-2.raw	3	P02649|APOE_HUMAN;H0Y7L5|H0Y7L5_HUMAN			FALSE
AAVYHHFISDGVR	60.69	1470.74	13	-1.9	491.252	3	15.4293	6920000	33200000	2876	20210614_HS_50ng_F1-3b.raw	9	P01024|CO3_HUMAN			FALSE
AC(+57.02)EPGVDYVYK	62.04	1299.58	11	-3.9	650.795	2	15.8456	9760000	52600000	2978	20210614_HS_50ng_F3-3.raw	7	P01024|CO3_HUMAN;M0QXZ3|M0QXZ3_HUMAN	Carbamidomethylation	C2:Carbamidomethylation:1000.00	FALSE
ADDKETC(+57.02)FAE(+21.98)EGK	59.04	1520.61	13	-3.3	761.308	2	5.9911	5940000	13400000	1046	20210614_HS_50ng_F2-3.raw	17	A0A087WWT3|A0A087WWT3_HUMAN;P02768|ALBU_HUMAN;C9JKR2|C9JKR2_HUMAN;D6RHD5|D6RHD5_HUMAN;B7WNR0|B7WNR0_HUMAN;H0YA55|H0YA55_HUMAN	Carbamidomethylation; Sodium adduct	C7:Carbamidomethylation:1000.00;E10:Sodium adduct:15.91	FALSE
ADDKETC(+57.02)FAEEGK	75.15	1498.62	13	-4.7	500.546	3	5.8627	58900000	224000000	1005	20210614_HS_50ng_F2-2.raw	53	A0A087WWT3|A0A087WWT3_HUMAN;P02768|ALBU_HUMAN;C9JKR2|C9JKR2_HUMAN;D6RHD5|D6RHD5_HUMAN;B7WNR0|B7WNR0_HUMAN;H0YA55|H0YA55_HUMAN	Carbamidomethylation	C7:Carbamidomethylation:1000.00	FALSE
ADDKETC(+57.02)FAEEGKK	63.09	1626.72	14	1.2	543.246	3	5.5336	19500000	37700000	1047	20210614_HS_50ng_F1-2.raw	24	A0A087WWT3|A0A087WWT3_HUMAN;P02768|ALBU_HUMAN;C9JKR2|C9JKR2_HUMAN;D6RHD5|D6RHD5_HUMAN;B7WNR0|B7WNR0_HUMAN;H0YA55|H0YA55_HUMAN	Carbamidomethylation	C7:Carbamidomethylation:1000.00	FALSE
ADGSYAAWLSR	52.87	1195.56	11	1.2	598.789	2	18.9642	1030000	14600000	4700	20210614_HS_50ng_F2-1.raw	6	A0A140TA32|A0A140TA32_HUMAN;A0A140TA29|A0A140TA29_HUMAN;P0C0L4|CO4A_HUMAN;P0C0L5|CO4B_HUMAN;A0A0G2JPR0|A0A0G2JPR0_HUMAN;A0A140TA49|A0A140TA49_HUMAN;F5GXS0|F5GXS0_HUMAN;A0A140TA44|A0A140TA44_HUMAN;A0A3B3ISA6|A0A3B3ISA6_HUMAN;A0A0G2JL54|A0A0G2JL54_HUMAN			FALSE
ADLAKYIC(+57.02)ENQDSISSK	39.26	1940.91	17	2.7	971.467	2	18.905	16700	521000	4440	20210614_HS_50ng_F2-3.raw	3	A0A0C4DGB6|A0A0C4DGB6_HUMAN;P02768|ALBU_HUMAN;C9JKR2|C9JKR2_HUMAN;D6RHD5|D6RHD5_HUMAN;B7WNR0|B7WNR0_HUMAN;H0YA55|H0YA55_HUMAN	Carbamidomethylation	C8:Carbamidomethylation:1000.00	FALSE
ADLSGITGAR	47.12	959.504	10	-2.1	480.758	2	10.6537	13900000	37400000	2090	20210614_HS_50ng_F2-3.raw	11	G3V3A0|G3V3A0_HUMAN;P01011|AACT_HUMAN			FALSE
ADRDQYELLC(+57.02)LD(+21.98)NTR	53.97	1902.85	15	-1.1	635.29	3	19.854	495000	4810000	5033	20210614_HS_50ng_F2-1.raw	1	C9JVG0|C9JVG0_HUMAN;P02787|TRFE_HUMAN	Carbamidomethylation; Sodium adduct	C10:Carbamidomethylation:1000.00;D12:Sodium adduct:0.00	FALSE
ADRDQYELLC(+57.02)LDNTR	67.51	1880.87	15	-4.4	627.961	3	20.5355	31100000	250000000	4801	20210614_HS_50ng_F2-2.raw	32	C9JVG0|C9JVG0_HUMAN;P02787|TRFE_HUMAN	Carbamidomethylation	C10:Carbamidomethylation:1000.00	FALSE
ADSVVDLLSYNVQGSGETTYDHK	59.12	2497.16	23	3.7	833.397	3	23.3544	547000	7140000	5308	20210614_HS_50ng_F3-3.raw	4	P04114|APOB_HUMAN			FALSE
ADVQAHGEGQ(+0.98)EFSITC(+57.02)LVDEEEM(+15.99)K	43.78	2738.17	24	9.8	913.739	3	23.1708			5444	20210614_HS_50ng_F3-1.raw	1	P19827|ITIH1_HUMAN;H7C0N0|H7C0N0_HUMAN	Deamidation (NQ); Carbamidomethylation; Oxidation (M)	Q10:Deamidation (NQ):13.13;C16:Carbamidomethylation:1000.00;M23:Oxidation (M):1000.00	FALSE
ADVQAHGEGQ(+0.98)EFSITC(+57.02)LVDEEEM(+15.99)KK	51.38	2866.26	25	6.8	717.578	4	22.6151	141000	1780000	6038	20210614_HS_50ng_F2-1.raw	1	P19827|ITIH1_HUMAN;H7C0N0|H7C0N0_HUMAN	Deamidation (NQ); Carbamidomethylation; Oxidation (M)	Q10:Deamidation (NQ):5.30;C16:Carbamidomethylation:1000.00;M23:Oxidation (M):1000.00	FALSE
ADVQAHGEGQEFSITC(+57.02)LVDEEEM(+15.99)K	52.59	2737.18	24	4.5	913.406	3	23.2119	723000	9370000	5444	20210614_HS_50ng_F3-1.raw	5	P19827|ITIH1_HUMAN;H7C0N0|H7C0N0_HUMAN	Carbamidomethylation; Oxidation (M)	C16:Carbamidomethylation:1000.00	FALSE
ADVQAHGEGQEFSITC(+57.02)LVDEEEM(+15.99)KK	61.05	2865.28	25	0.6	717.328	4	22.6078	238000	3080000	6038	20210614_HS_50ng_F2-1.raw	3	P19827|ITIH1_HUMAN;H7C0N0|H7C0N0_HUMAN	Carbamidomethylation; Oxidation (M)	C16:Carbamidomethylation:1000.00	FALSE
AE(+21.98)MADQAAAWLTR	41.35	1454.66	13	9.4	728.343	2	18.8352	12800	407000	3974	20210614_HS_50ng_F3-1.raw	1	A0A140TA32|A0A140TA32_HUMAN;A0A140TA29|A0A140TA29_HUMAN;P0C0L5|CO4B_HUMAN;A0A0G2JPR0|A0A0G2JPR0_HUMAN;A0A140TA49|A0A140TA49_HUMAN;F5GXS0|F5GXS0_HUMAN;A0A140TA44|A0A140TA44_HUMAN;A0A3B3ISA6|A0A3B3ISA6_HUMAN;A0A0G2JL54|A0A0G2JL54_HUMAN	Sodium adduct	E2:Sodium adduct:22.45	FALSE
AEAQAQYSAAVAK	51.85	1306.65	13	-1.5	654.332	2	6.4051	193000	1190000	1127	20210614_HS_50ng_F3-3.raw	3	Q14624|ITIH4_HUMAN;B7ZKJ8|B7ZKJ8_HUMAN			FALSE
AEATTLHVAPQGTAM(+15.99)AVSTFR	55.68	2174.08	21	-1.2	725.699	3	19.8531	789000	10400000	4585	20210614_HS_50ng_F2-2.raw	3	P07360|CO8G_HUMAN	Oxidation (M)		FALSE
AEDHFSVIDFNQNIR	68.27	1803.85	15	1.3	602.293	3	22.5175	4190000	31500000	5444	20210614_HS_50ng_F2-2.raw	6	Q5T985|Q5T985_HUMAN;P19823|ITIH2_HUMAN			FALSE
AEDTAVYYC(+57.02)AK	54.36	1289.56	11	-4.5	645.784	2	7.7636	243000	1050000	1459	20210614_HS_50ng_F3-3.raw	2		Carbamidomethylation	C9:Carbamidomethylation:1000.00	FALSE
AEDTAVYYC(+57.02)AR	46.39	1317.57	11	2	659.792	2	6.4003	1790000	3900000	1310	20210614_HS_50ng_F3-1.raw	7		Carbamidomethylation	C9:Carbamidomethylation:1000.00	FALSE
AEDTAVYYC(+57.02)VR	40.43	1345.6	11	-9	673.8	2	15.4637	171000	1130000	2892	20210614_HS_50ng_F3-3.raw	2		Carbamidomethylation	C9:Carbamidomethylation:1000.00	FALSE
AEEEHLGILGPQLHADVGDK	65.44	2127.06	20	3.9	710.03	3	20.6178	816000	10400000	5038	20210614_HS_50ng_F2-3.raw	7	E9PFZ2|E9PFZ2_HUMAN;H7C5R1|H7C5R1_HUMAN;P00450|CERU_HUMAN			FALSE
AEFAE(+21.98)VSK	46.49	901.416	8	-1.2	451.715	2	5.3852	70600000	243000000	1041	20210614_HS_50ng_F2-1.raw	27	A0A0C4DGB6|A0A0C4DGB6_HUMAN;P02768|ALBU_HUMAN;C9JKR2|C9JKR2_HUMAN;D6RHD5|D6RHD5_HUMAN;B7WNR0|B7WNR0_HUMAN;H0YA55|H0YA55_HUMAN	Sodium adduct	E5:Sodium adduct:50.58	FALSE
AEFAEVSK	50.29	879.434	8	2.6	880.443	1	5.2218	235000000	1250000000	1817	20210614_HS_50ng_F2-1.raw	89	A0A0C4DGB6|A0A0C4DGB6_HUMAN;P02768|ALBU_HUMAN;C9JKR2|C9JKR2_HUMAN;D6RHD5|D6RHD5_HUMAN;B7WNR0|B7WNR0_HUMAN;H0YA55|H0YA55_HUMAN			FALSE
AEFAEVSKLVTDLTK	68.07	1649.89	15	-1	550.969	3	26.2211	1770000	23700000	6335	20210614_HS_50ng_F2-2.raw	6	A0A0C4DGB6|A0A0C4DGB6_HUMAN;P02768|ALBU_HUMAN;C9JKR2|C9JKR2_HUMAN;D6RHD5|D6RHD5_HUMAN;B7WNR0|B7WNR0_HUMAN;H0YA55|H0YA55_HUMAN			FALSE
AEFQDALEK	49.21	1049.5	9	-2.7	525.757	2	11.4718	7830000	30200000	2374	20210614_HS_50ng_F2-2.raw	11	A0A140TA32|A0A140TA32_HUMAN;A0A140TA29|A0A140TA29_HUMAN;P0C0L4|CO4A_HUMAN;P0C0L5|CO4B_HUMAN;A0A0G2JPR0|A0A0G2JPR0_HUMAN;A0A140TA49|A0A140TA49_HUMAN;F5GXS0|F5GXS0_HUMAN;A0A140TA44|A0A140TA44_HUMAN;A0A0G2JL54|A0A0G2JL54_HUMAN			FALSE
AEM(+15.99)ADQAAAWLTR	63.32	1448.67	13	-3.4	725.341	2	19.1031	4090000	31000000	3880	20210614_HS_50ng_F3-3.raw	13	A0A140TA32|A0A140TA32_HUMAN;A0A140TA29|A0A140TA29_HUMAN;P0C0L5|CO4B_HUMAN;A0A0G2JPR0|A0A0G2JPR0_HUMAN;A0A140TA49|A0A140TA49_HUMAN;F5GXS0|F5GXS0_HUMAN;A0A140TA44|A0A140TA44_HUMAN;A0A3B3ISA6|A0A3B3ISA6_HUMAN;A0A0G2JL54|A0A0G2JL54_HUMAN	Oxidation (M)		FALSE
AEPLAFTFSHDYK	62.87	1524.72	13	1.3	763.371	2	21.3875	448000	4270000	5311	20210614_HS_50ng_F2-3.raw	4	P04114|APOB_HUMAN			FALSE
AEQC(+57.02)C(+57.02)EETASSISLHGK	53.7	1905.82	17	-0.2	636.28	3	12.5186	159000	942000	2515	20210614_HS_50ng_F2-3.raw	1	P02748|CO9_HUMAN	Carbamidomethylation; Carbamidomethylation	C4:Carbamidomethylation:1000.00;C5:Carbamidomethylation:1000.00	FALSE
AESPEVC(+57.02)FNEESPK	61.49	1621.69	14	2.1	811.856	2	16.0452	675000	5600000	3034	20210614_HS_50ng_F3-3.raw	3	P43652|AFAM_HUMAN	Carbamidomethylation	C7:Carbamidomethylation:1000.00	FALSE
AFDIC(+57.02)PLVK	49.86	1061.56	9	0	531.786	2	21.7285	93900	1240000	5174	20210614_HS_50ng_F2-2.raw	2	P01031|CO5_HUMAN	Carbamidomethylation	C5:Carbamidomethylation:1000.00	FALSE
AGALN(+0.98)SNDAFVLK	44.22	1319.67	13	1.2	660.844	2	19.7401	117000	1110000	3949	20210614_HS_50ng_F3-2.raw	2	A0A0A0MS51|A0A0A0MS51_HUMAN;P06396|GELS_HUMAN;A0A0A0MT01|A0A0A0MT01_HUMAN	Deamidation (NQ)	N5:Deamidation (NQ):26.31	FALSE
AGALNSNDAFVLK	68.85	1318.69	13	0.4	660.352	2	19.8699	1530000	19100000	3949	20210614_HS_50ng_F3-2.raw	6	A0A0A0MS51|A0A0A0MS51_HUMAN;P06396|GELS_HUMAN;A0A0A0MT01|A0A0A0MT01_HUMAN			FALSE
AGDFLEANYM(+15.99)NLQR	61.87	1656.76	14	-1.1	829.385	2	20.1816	25300000	228000000	3916	20210614_HS_50ng_F4-3.raw	17	M0R0Q9|M0R0Q9_HUMAN;P01024|CO3_HUMAN	Oxidation (M)		FALSE
AGEQVTYTC(+57.02)ATYYK	62.82	1653.73	14	0.2	827.875	2	14.5425	812000	5150000	2856	20210614_HS_50ng_F3-1.raw	3	P08603|CFAH_HUMAN	Carbamidomethylation	C9:Carbamidomethylation:1000.00	FALSE
AGEVQEPELR	50.78	1126.56	10	1.4	564.289	2	9.8628	2940000	9580000	1987	20210614_HS_50ng_F2-3.raw	7	P25311|ZA2G_HUMAN			FALSE
AGGSWDLAVQER	35.49	1287.62	12	1.2	644.818	2	18.1864	80500	724000	4081	20210614_HS_50ng_F2-2.raw	1	P22792|CPN2_HUMAN			FALSE
AGLLRPDYALLGHR	75.18	1550.87	14	3.5	517.964	3	21.7158	363000	3060000	4291	20210614_HS_50ng_F1-2.raw	3	Q96PD5|PGRP2_HUMAN			FALSE
AGVETTTPSK	46.52	989.503	10	-0.1	495.759	2	2.5299	3770000	4830000	318	20210614_HS_50ng_F2-1.raw	13	P0DOY2|IGLC2_HUMAN;P0DOY3|IGLC3_HUMAN			FALSE
AHLDIAGSLEGHLR	70.93	1487.78	14	1.8	496.935	3	20.748	509000	3180000	4069	20210614_HS_50ng_F1-2.raw	3	P04114|APOB_HUMAN			FALSE
AIEDYINEFSVR	63.92	1454.7	12	3.8	728.362	2	23.7399	1250000	12300000	5016	20210614_HS_50ng_F3-2.raw	3	P02748|CO9_HUMAN			FALSE
AIGYLN(+0.98)TGYQR	50.86	1255.62	11	-1.5	628.816	2	14.6367	1050000	5350000	2921	20210614_HS_50ng_F3-1.raw	4	P01023|A2MG_HUMAN	Deamidation (NQ)	N6:Deamidation (NQ):25.11	FALSE
AIGYLNTGYQR	59.58	1254.64	11	-3.5	628.323	2	15.5267	29100000	190000000	3548	20210614_HS_50ng_F2-1.raw	14	P01023|A2MG_HUMAN			FALSE
AIPVTQYLK	47.58	1031.6	9	1.3	516.809	2	18.9751			4721	20210614_HS_50ng_F2-1.raw	2	P43652|AFAM_HUMAN			FALSE
AKLPDATPTELAK	36.79	1353.75	13	-3.8	452.256	3	16.0958	58900	741000	3424	20210614_HS_50ng_F2-2.raw	3	P02774|VTDB_HUMAN;D6RF35|D6RF35_HUMAN			FALSE
AKPALEDLR	44.89	1011.57	9	-1.3	506.791	2	8.6386	5800000	22500000	1644	20210614_HS_50ng_F1-2.raw	7	F8W696|F8W696_HUMAN;P02647|APOA1_HUMAN			FALSE
ALEEANADLEVK	54.98	1300.65	12	-0.5	651.332	2	15.8886	239000	1510000	2962	20210614_HS_50ng_F3-2.raw	2	P02533|K1C14_HUMAN;P08779|K1C16_HUMAN			FALSE
ALEESNYELEGK	59.19	1380.64	12	-7	691.323	2	13.9447	936000	3810000	2550	20210614_HS_50ng_F3-2.raw	5	#CONTAM#cont|000133|;#CONTAM#cont|000131|;P13645|K1C10_HUMAN;#CONTAM#cont|000129|;#CONTAM#cont|000136|;#CONTAM#cont|000122|			FALSE
ALEILQEEDLIDEDDIPVR	40.91	2224.11	19	-0.4	742.377	3	26.255	8600	223000	6071	20210614_HS_50ng_F4-1.raw	1	A0A140TA32|A0A140TA32_HUMAN;A0A140TA29|A0A140TA29_HUMAN;P0C0L4|CO4A_HUMAN;P0C0L5|CO4B_HUMAN;A0A0G2JPR0|A0A0G2JPR0_HUMAN;A0A140TA49|A0A140TA49_HUMAN;F5GXS0|F5GXS0_HUMAN;A0A140TA44|A0A140TA44_HUMAN;A0A3B3ISA6|A0A3B3ISA6_HUMAN;A0A0G2JL54|A0A0G2JL54_HUMAN			FALSE
ALFVSEEEK	35.47	1050.52	9	-5.9	526.266	2	12.3388	78300	463000	2517	20210614_HS_50ng_F2-2.raw	1	H7C5H1|H7C5H1_HUMAN;E7ETN3|E7ETN3_HUMAN;P00751|CFAB_HUMAN;B4E1Z4|B4E1Z4_HUMAN			FALSE
ALLAFQESK	47.03	1005.55	9	-0.9	503.782	2	17.4049	250000	2480000	3774	20210614_HS_50ng_F2-2.raw	1				FALSE
ALLAYAFALAGNQDK	69.02	1564.83	15	1.7	783.421	2	25.7379	78400	956000	5941	20210614_HS_50ng_F3-3.raw	1	P01023|A2MG_HUMAN			FALSE
ALNHLPLEYNSALYSR	51.38	1859.95	16	2.9	620.993	3	22.3101	243000	2500000	5358	20210614_HS_50ng_F2-2.raw	2	P13671|CO6_HUMAN			FALSE
ALPAPIEK	40.31	837.496	8	-2.2	419.754	2	7.4764	47500000	400000000	1605	20210614_HS_50ng_F2-1.raw	21	A0A4W9A917|A0A4W9A917_HUMAN;P01857|IGHG1_HUMAN;P01860|IGHG3_HUMAN;A0A0A0MS08|A0A0A0MS08_HUMAN;A0A0A0MS07|A0A0A0MS07_HUMAN;A0A286YES1|A0A286YES1_HUMAN			FALSE
ALQDQLVLVAAK	59.61	1267.75	12	-0.3	634.882	2	20.6433	3400000	33100000	4554	20210614_HS_50ng_F3-1.raw	6	P01019|ANGT_HUMAN			FALSE
ALVEQGFTVPEIK	64.25	1429.78	13	-1.6	715.897	2	23.2801	3010000	28200000	4897	20210614_HS_50ng_F3-2.raw	9	P04114|APOB_HUMAN			FALSE
ALVQQM(+15.99)EQLR	38.05	1230.64	10	1.4	616.328	2	8.1116	34100	514000	1612	20210614_HS_50ng_F2-2.raw	1	P06727|APOA4_HUMAN	Oxidation (M)		FALSE
ALYLQYTDETFR	64.02	1518.74	12	-8	760.369	2	21.7095	1650000	22400000	4777	20210614_HS_50ng_F3-3.raw	12	E9PFZ2|E9PFZ2_HUMAN;P00450|CERU_HUMAN			FALSE
ALYWVN(+0.98)GQVPDGVSK	56.34	1632.81	15	-5.3	817.41	2	21.3112	450000	7040000	4775	20210614_HS_50ng_F3-1.raw	2	A8MUN2|A8MUN2_HUMAN;P04114|APOB_HUMAN	Deamidation (NQ)	N6:Deamidation (NQ):8.22	FALSE
ALYWVNGQ(+0.98)VPDGVSK	63.49	1632.81	15	0.5	817.415	2	22.0887	162000	1490000	4583	20210614_HS_50ng_F3-2.raw	1	A8MUN2|A8MUN2_HUMAN;P04114|APOB_HUMAN	Deamidation (NQ)	Q8:Deamidation (NQ):0.00	FALSE
ALYYDLISSPDIHGTYK	55	1954.97	17	0.1	652.663	3	23.7333	179000	2600000	5783	20210614_HS_50ng_F2-2.raw	2	I3L4Z0|I3L4Z0_HUMAN;P36955|PEDF_HUMAN;I3L2R7|I3L2R7_HUMAN			FALSE
AM(+15.99)AVEDIISR	46.08	1119.56	10	1.6	560.788	2	15.7937	1490000	6100000	3363	20210614_HS_50ng_F2-3.raw	3		Oxidation (M)		FALSE
AN(+0.98)PTVTLFPPSSEELQANK	32.48	2043.02	19	2.3	682.014	3	23.7765	119000	581000	5536	20210614_HS_50ng_F4-1.raw	1	A0A0B4J231|A0A0B4J231_HUMAN;B9A064|IGLL5_HUMAN	Deamidation (NQ)	N2:Deamidation (NQ):25.66	FALSE
ANPTVTLFPPSSEELQANK	51.14	2042.03	19	-0.9	1022.02	2	22.1779	16300000	35800000	5127	20210614_HS_50ng_F4-1.raw	5	A0A0B4J231|A0A0B4J231_HUMAN;B9A064|IGLL5_HUMAN			FALSE
ANTVQEATFQM(+15.99)ELPK	64.91	1721.83	15	0.7	861.923	2	18.8846	5260000	46700000	3831	20210614_HS_50ng_F3-3.raw	6	Q14624|ITIH4_HUMAN;B7ZKJ8|B7ZKJ8_HUMAN	Oxidation (M)		FALSE
APDVFPIISGC(+57.02)R	41.86	1330.67	12	2.2	666.344	2	22.8671	198000	1540000	4814	20210614_HS_50ng_F3-2.raw	2	A0A0A0MS09|A0A0A0MS09_HUMAN;P01880|IGHD_HUMAN	Carbamidomethylation	C11:Carbamidomethylation:1000.00	FALSE
APSTWLTAYVVK	34.42	1334.72	12	2.1	668.37	2	23.5451	76700	1500000	5594	20210614_HS_50ng_F3-1.raw	1	P01024|CO3_HUMAN			FALSE
AQLGDLPWQVAIK	56.38	1437.8	13	-0.3	719.906	2	25.0397	338000	3910000	6012	20210614_HS_50ng_F3-1.raw	4	G3XAM2|G3XAM2_HUMAN;A0A2R8Y3M9|A0A2R8Y3M9_HUMAN;E7ETH0|E7ETH0_HUMAN;P05156|CFAI_HUMAN			FALSE
AQPVQVAEGSEPDGFWEALGGK	28.39	2271.08	22	-0.2	758.034	3	24.7755	70600	598000	5739	20210614_HS_50ng_F4-1.raw	1	A0A0A0MS51|A0A0A0MS51_HUMAN;P06396|GELS_HUMAN;A0A0A0MT01|A0A0A0MT01_HUMAN			FALSE
AQTTVTC(+57.02)M(+15.99)EN(+0.98)GWSPTPR	49.98	1951.84	17	2.5	976.93	2	16.7235			3162	20210614_HS_50ng_F3-2.raw	2	A0A0D9SG88|A0A0D9SG88_HUMAN;P08603|CFAH_HUMAN;Q5TFM2|Q5TFM2_HUMAN	Carbamidomethylation; Oxidation (M); Deamidation (NQ)	C7:Carbamidomethylation:1000.00;M8:Oxidation (M):1000.00;N10:Deamidation (NQ):13.99	FALSE
AQTTVTC(+57.02)M(+15.99)ENGWSPTPR	47.52	1950.86	17	-0.5	976.435	2	16.3541	136000	1560000	3109	20210614_HS_50ng_F3-3.raw	2	A0A0D9SG88|A0A0D9SG88_HUMAN;P08603|CFAH_HUMAN;Q5TFM2|Q5TFM2_HUMAN	Carbamidomethylation; Oxidation (M)	C7:Carbamidomethylation:1000.00	FALSE
AREDIFM(+15.99)ETLK	50.77	1367.68	11	1.8	456.9	3	18.1075	638000	4640000	3594	20210614_HS_50ng_F1-3b.raw	4	C9JEV0|C9JEV0_HUMAN;P25311|ZA2G_HUMAN	Oxidation (M)		FALSE
ASGSLPYTQTLQDHLNSLK	65.6	2072.05	19	2.1	691.693	3	22.1382	1100000	10400000	5875	20210614_HS_50ng_F2-1.raw	3	P04114|APOB_HUMAN			FALSE
ASLENSLEETK	38.63	1219.59	11	2.1	610.805	2	12.6409	84300	401000	2527	20210614_HS_50ng_F2-3.raw	1	P02533|K1C14_HUMAN;P08779|K1C16_HUMAN			FALSE
ASQSVSSNLAWYQQKPGQAPR	63.59	2302.15	21	0.7	768.39	3	18.8839	348000	4540000	4428	20210614_HS_50ng_F2-3.raw	3				FALSE
ASQSVSSSYLAWYQQKPGQAPR	40.35	2438.2	22	-1.8	813.738	3	20.7451	26500	473000	5350	20210614_HS_50ng_F2-1.raw	2	P01619|KV320_HUMAN			FALSE
ASSIIDELFQDR	57.4	1392.69	12	-8.3	697.346	2	25.5937	2200000	27100000	5899	20210614_HS_50ng_F3-3.raw	6	H0YLK8|H0YLK8_HUMAN;P10909|CLUS_HUMAN;H0YC35|H0YC35_HUMAN;E7ERK6|E7ERK6_HUMAN			FALSE
ASSLESGVPSR	35.97	1088.55	11	-1.6	545.279	2	7.0485	251000	1290000	1295	20210614_HS_50ng_F2-3.raw	2				FALSE
ASYLDC(+57.02)IR	50.5	996.47	8	-1.6	499.241	2	14.4874	12100000	39200000	3262	20210614_HS_50ng_F2-1.raw	9	F8WCI6|F8WCI6_HUMAN;P02787|TRFE_HUMAN;F8WEK9|F8WEK9_HUMAN;C9JB55|C9JB55_HUMAN	Carbamidomethylation	C6:Carbamidomethylation:1000.00	FALSE
ATEDEGSEQKIPEATNR	38.18	1873.87	17	-1.6	625.628	3	6.8502	56300	845000	1247	20210614_HS_50ng_F2-3.raw	1	P01008|ANT3_HUMAN;Q8TCE1|Q8TCE1_HUMAN			FALSE
ATEHLSTLSEK	51.1	1214.61	11	1.3	608.314	2	6.4998	1580000	3320000	1053	20210614_HS_50ng_F1-2.raw	3	F8W696|F8W696_HUMAN;P02647|APOA1_HUMAN			FALSE
ATFGC(+57.02)HDGYSLDGPEEIEC(+57.02)TK	90.13	2384.99	21	-2.3	796.002	3	19.9194	5030000	41500000	4605	20210614_HS_50ng_F2-2.raw	3	J3QLI0|J3QLI0_HUMAN;P02749|APOH_HUMAN	Carbamidomethylation; Carbamidomethylation	C5:Carbamidomethylation:1000.00;C19:Carbamidomethylation:1000.00	FALSE
ATFQTPDFIVPLTDLR	55.09	1832.97	16	2.8	917.493	2	28.6149	183000	1860000	6860	20210614_HS_50ng_F3-1.raw	2	P04114|APOB_HUMAN			FALSE
ATGVLYDYVNK	58.07	1241.63	11	1	621.822	2	17.2799	2350000	13400000	4121	20210614_HS_50ng_F2-1.raw	5	P04114|APOB_HUMAN			FALSE
ATLLDIYK	41.32	935.533	8	1.4	468.774	2	20.2646	101000	719000	4720	20210614_HS_50ng_F2-2.raw	1	P01031|CO5_HUMAN			FALSE
ATLYALSHAVNNYHK	50.74	1700.86	15	7	567.966	3	18.4835	350000	3810000	3689	20210614_HS_50ng_F1-3b.raw	4	A8MUN2|A8MUN2_HUMAN;P04114|APOB_HUMAN			FALSE
ATTVTGTPC(+57.02)QDWAAQEPHR	56.97	2124.96	19	2.4	709.331	3	16.1314	2090000	18800000	3766	20210614_HS_50ng_F2-1.raw	3	P00747|PLMN_HUMAN	Carbamidomethylation	C9:Carbamidomethylation:1000.00	FALSE
ATVLN(+0.98)YLPK	39.72	1018.57	9	3.3	510.294	2	18.4784	136000	981000	4182	20210614_HS_50ng_F2-2.raw	2	P01023|A2MG_HUMAN;P20742|PZP_HUMAN	Deamidation (NQ)		FALSE
ATVLNYLPK	52.55	1017.59	9	0.2	509.8	2	19.854	17500000	103000000	5022	20210614_HS_50ng_F2-1.raw	3	P01023|A2MG_HUMAN;P20742|PZP_HUMAN			FALSE
ATVVYQGER	41.86	1021.52	9	-0.7	511.767	2	6.1936	27400	269000	1077	20210614_HS_50ng_F2-3.raw	3	P02749|APOH_HUMAN			FALSE
ATWSGAVLAGR	60.02	1087.58	11	0.3	544.796	2	17.7555	5120000	25500000	3517	20210614_HS_50ng_F3-3.raw	6	P04217|A1BG_HUMAN			FALSE
AVGDKLPEC(+57.02)EADDGC(+57.02)PKPPEIAHGYVEHSVR	52.06	3431.59	31	-2.8	858.902	4	18.8128	140000	1320000	3957	20210614_HS_50ng_F1-1.raw	2	P00738|HPT_HUMAN;J3QLC9|J3QLC9_HUMAN;H0Y300|H0Y300_HUMAN;J3KRH2|J3KRH2_HUMAN;J3QR68|J3QR68_HUMAN	Carbamidomethylation; Carbamidomethylation	C9:Carbamidomethylation:1000.00;C15:Carbamidomethylation:1000.00	FALSE
AVGDKLPEC(+57.02)EAVC(+57.02)GKPK	42.5	1856.91	17	-2.8	465.234	4	13.2606	322000	1640000	2396	20210614_HS_50ng_F1-3b.raw	3	P00738|HPT_HUMAN;H0Y300|H0Y300_HUMAN;A0A0C4DGL8|A0A0C4DGL8_HUMAN;J3QR68|J3QR68_HUMAN;P00739|HPTR_HUMAN	Carbamidomethylation; Carbamidomethylation	C9:Carbamidomethylation:1000.00;C13:Carbamidomethylation:1000.00	FALSE
AVISPGFDVFAK	52.86	1249.67	12	1.7	625.844	2	23.4212	419000	4920000	5338	20210614_HS_50ng_F3-3.raw	5	E7ETN3|E7ETN3_HUMAN;B4E1Z4|B4E1Z4_HUMAN			FALSE
AVLDVFEEGTEASAATAVK	77.74	1906.95	19	0.7	954.484	2	22.7951	7590000	56000000	4629	20210614_HS_50ng_F4-3.raw	11	G3V3A0|G3V3A0_HUMAN;P01011|AACT_HUMAN			FALSE
AVLTIDEK	42.47	887.496	8	-1.4	444.755	2	7.5859	53400000	214000000	1832	20210614_HS_50ng_F2-1.raw	19				FALSE
AVLYNYR	43.71	897.471	7	-4.5	449.741	2	10.1385	7570000	25100000	2026	20210614_HS_50ng_F2-2.raw	13	P01024|CO3_HUMAN			FALSE
AVM(+15.99)D(+21.98)DFAAFVEK	51.02	1379.6	12	-3.2	460.874	3	21.4609	275000	1700000	4843	20210614_HS_50ng_F3-1.raw	4	A0A0C4DGB6|A0A0C4DGB6_HUMAN;A0A087WWT3|A0A087WWT3_HUMAN;P02768|ALBU_HUMAN;C9JKR2|C9JKR2_HUMAN;D6RHD5|D6RHD5_HUMAN;B7WNR0|B7WNR0_HUMAN;H0YA55|H0YA55_HUMAN	Oxidation (M); Sodium adduct	M3:Oxidation (M):1000.00;D4:Sodium adduct:0.00	FALSE
AVM(+15.99)DD(+21.98)FAAFVEK	56.68	1379.6	12	1.5	690.811	2	21.44	10600000	43000000	4835	20210614_HS_50ng_F3-1.raw	13	A0A0C4DGB6|A0A0C4DGB6_HUMAN;A0A087WWT3|A0A087WWT3_HUMAN;P02768|ALBU_HUMAN;C9JKR2|C9JKR2_HUMAN;D6RHD5|D6RHD5_HUMAN;B7WNR0|B7WNR0_HUMAN;H0YA55|H0YA55_HUMAN	Oxidation (M); Sodium adduct	M3:Oxidation (M):1000.00;D5:Sodium adduct:0.00	FALSE
AVM(+15.99)DDFAAFVEK	73.15	1357.62	12	-5.3	679.815	2	21.8027	301000000	1520000000	3476	20210614_HS_50ng_F5-2.raw	208	A0A0C4DGB6|A0A0C4DGB6_HUMAN;A0A087WWT3|A0A087WWT3_HUMAN;P02768|ALBU_HUMAN;C9JKR2|C9JKR2_HUMAN;D6RHD5|D6RHD5_HUMAN;B7WNR0|B7WNR0_HUMAN;H0YA55|H0YA55_HUMAN	Oxidation (M)		FALSE
AVMD(+21.98)DFAAFVEK	50.72	1363.61	12	4.4	682.815	2	23.8942	390000	3260000	5487	20210614_HS_50ng_F3-3.raw	3	A0A0C4DGB6|A0A0C4DGB6_HUMAN;A0A087WWT3|A0A087WWT3_HUMAN;P02768|ALBU_HUMAN;C9JKR2|C9JKR2_HUMAN;D6RHD5|D6RHD5_HUMAN;B7WNR0|B7WNR0_HUMAN;H0YA55|H0YA55_HUMAN	Sodium adduct	D4:Sodium adduct:12.28	FALSE
AVMDD(+21.98)FAAFVEK	52.84	1363.61	12	4.2	682.815	2	23.6664	117000	1240000	5614	20210614_HS_50ng_F3-1.raw	1	A0A0C4DGB6|A0A0C4DGB6_HUMAN;A0A087WWT3|A0A087WWT3_HUMAN;P02768|ALBU_HUMAN;C9JKR2|C9JKR2_HUMAN;D6RHD5|D6RHD5_HUMAN;B7WNR0|B7WNR0_HUMAN;H0YA55|H0YA55_HUMAN	Sodium adduct	D5:Sodium adduct:8.69	FALSE
AVMDDFAAFVEK	71.68	1341.63	12	-2.2	671.819	2	24.4204	24500000	369000000	3933	20210614_HS_50ng_F5-2.raw	19	A0A0C4DGB6|A0A0C4DGB6_HUMAN;A0A087WWT3|A0A087WWT3_HUMAN;P02768|ALBU_HUMAN;C9JKR2|C9JKR2_HUMAN;D6RHD5|D6RHD5_HUMAN;B7WNR0|B7WNR0_HUMAN;H0YA55|H0YA55_HUMAN			FALSE
AVSM(+15.99)PSFSILGSDVR	48.56	1580.79	15	2.6	791.403	2	22.2573	2970000	45700000	5098	20210614_HS_50ng_F3-1.raw	7	P04114|APOB_HUMAN	Oxidation (M)		FALSE
AYLEEEC(+57.02)PATLR	54.3	1450.68	12	-0.6	726.345	2	17.2553	1400000	10400000	3363	20210614_HS_50ng_F3-3.raw	3	C9JEV0|C9JEV0_HUMAN;P25311|ZA2G_HUMAN	Carbamidomethylation	C7:Carbamidomethylation:1000.00	FALSE
AYSLFSYNTQGR	57.73	1405.66	12	-4.5	703.835	2	19.5986	686000	13300000	4211	20210614_HS_50ng_F3-1.raw	4	P02743|SAMP_HUMAN			FALSE
AYYENSPQQVFSTEFEVK	56.66	2165	18	-0.6	722.672	3	23.3809	696000	7090000	5340	20210614_HS_50ng_F4-1.raw	6	P01024|CO3_HUMAN			FALSE
C(+57.02)C(+57.02)TESLVNR	66.02	1137.49	9	-2.9	569.751	2	7.8981	14900000	57700000	1588	20210614_HS_50ng_F2-2.raw	36	A0A0C4DGB6|A0A0C4DGB6_HUMAN;#CONTAM#cont|000097|;#CONTAM#cont|000035|;A0A087WWT3|A0A087WWT3_HUMAN;P02768|ALBU_HUMAN;#CONTAM#cont|000017|;C9JKR2|C9JKR2_HUMAN;D6RHD5|D6RHD5_HUMAN;B7WNR0|B7WNR0_HUMAN;H0YA55|H0YA55_HUMAN	Carbamidomethylation; Carbamidomethylation	C1:Carbamidomethylation:1000.00;C2:Carbamidomethylation:1000.00	FALSE
C(+57.02)C(+57.02)VEC(+57.02)PPC(+57.02)PAPPVAGPSVFLFPPKPK	26.79	2907.39	26	-2.1	970.137	3	26.4021	138000	564000	6089	20210614_HS_50ng_F3-3.raw	1	P01859|IGHG2_HUMAN;A0A286YEY4|A0A286YEY4_HUMAN	Carbamidomethylation; Carbamidomethylation; Carbamidomethylation; Carbamidomethylation	C1:Carbamidomethylation:1000.00;C2:Carbamidomethylation:1000.00;C5:Carbamidomethylation:1000.00;C8:Carbamidomethylation:1000.00	FALSE
C(+57.02)DEWSVNSVGK	51.55	1279.55	11	2.6	640.784	2	14.7306	839000	3020000	2721	20210614_HS_50ng_F3-3.raw	4	P02787|TRFE_HUMAN	Carbamidomethylation	C1:Carbamidomethylation:1000.00	FALSE
C(+57.02)PAPELLGGPSVFLFPPKPK	54.97	2150.16	20	-3.4	717.725	3	27.5418	241000	1610000	7526	20210614_HS_50ng_F2-1.raw	3	A0A4W9A917|A0A4W9A917_HUMAN;P01860|IGHG3_HUMAN;A0A286YES1|A0A286YES1_HUMAN	Carbamidomethylation	C1:Carbamidomethylation:1000.00	FALSE
C(+57.02)PNPPVQENFDVNK	49.91	1656.76	14	-1.5	829.384	2	16.7348	344000	2360000	3229	20210614_HS_50ng_F3-3.raw	3	C9JX71|C9JX71_HUMAN;P05090|APOD_HUMAN;C9JF17|C9JF17_HUMAN	Carbamidomethylation	C1:Carbamidomethylation:1000.00	FALSE
C(+57.02)STSSLLEAC(+57.02)TFR	60.84	1530.68	13	-0.3	766.347	2	19.688	227000	6470000	4225	20210614_HS_50ng_F3-1.raw	3	P02787|TRFE_HUMAN	Carbamidomethylation; Carbamidomethylation	C1:Carbamidomethylation:1000.00;C10:Carbamidomethylation:1000.00	FALSE
C(+57.02)SYTEDAQC(+57.02)IDGTIEVPK	50.3	2084.9	18	-1.7	1043.46	2	21.5313	137000	1470000	3531	20210614_HS_50ng_F5-3.raw	2	P02749|APOH_HUMAN	Carbamidomethylation; Carbamidomethylation	C1:Carbamidomethylation:1000.00;C9:Carbamidomethylation:1000.00	FALSE
D(+21.98)IQM(+15.99)TQSPSSLSASVGDR	59.27	1915.86	18	-1	639.625	3	16.5768	7110000	63100000	2854	20210614_HS_50ng_F4-2.raw	5	A0A2Q2TTZ9|A0A2Q2TTZ9_HUMAN	Sodium adduct; Oxidation (M)	D1:Sodium adduct:61.78;M4:Oxidation (M):1000.00	FALSE
DADPDTFFAK	49.82	1125.5	10	0.3	563.756	2	16.1177	2290000	7780000	3200	20210614_HS_50ng_F3-1.raw	3	P43652|AFAM_HUMAN			FALSE
DAEAWFNEK	51.83	1108.48	9	1.1	555.249	2	17.2141	308000	1600000	3348	20210614_HS_50ng_F3-3.raw	3	#CONTAM#cont|000133|;P13645|K1C10_HUMAN;#CONTAM#cont|000129|;#CONTAM#cont|000136|;#CONTAM#cont|000122|;#CONTAM#cont|000130|			FALSE
DALSSVQE(+21.98)SQVAQQAR	57.33	1737.83	16	3.4	580.284	3	15.9821	365000	1960000	2869	20210614_HS_50ng_F4-3.raw	2	P02656|APOC3_HUMAN;B0YIW2|B0YIW2_HUMAN	Sodium adduct	E8:Sodium adduct:67.12	FALSE
DALSSVQESQVAQQAR	69	1715.84	16	1.3	858.93	2	15.9756	2160000	15400000	2862	20210614_HS_50ng_F4-3.raw	8	P02656|APOC3_HUMAN;B0YIW2|B0YIW2_HUMAN			FALSE
DASGATFTWTPSSGK	77.17	1511.69	15	2.6	756.854	2	18.4595	4260000	29000000	3431	20210614_HS_50ng_F4-3.raw	9				FALSE
DASGVTFTWTPSSGK	77.42	1539.72	15	0.6	770.868	2	20.3709	25300000	282000000	3305	20210614_HS_50ng_F5-3.raw	25	P01876|IGHA1_HUMAN;A0A286YEY1|A0A286YEY1_HUMAN			FALSE
DC(+57.02)HLAQVPSHTVVAR	77.13	1688.84	15	-0.1	563.954	3	14.9966	22100000	165000000	2768	20210614_HS_50ng_F1-3b.raw	28	P02787|TRFE_HUMAN	Carbamidomethylation	C2:Carbamidomethylation:1000.00	FALSE
DD(+21.98)NPNLPR	43.32	961.423	8	-8.4	481.715	2	3.515	164000000	873000000	1369	20210614_HS_50ng_F3-2.raw	44	A0A0C4DGB6|A0A0C4DGB6_HUMAN;A0A087WWT3|A0A087WWT3_HUMAN;P02768|ALBU_HUMAN;H7C013|H7C013_HUMAN	Sodium adduct	D2:Sodium adduct:17.01	FALSE
DDFLIYDR	56.49	1055.49	8	1.2	528.754	2	18.8352	124000	853000	3966	20210614_HS_50ng_F3-1.raw	2	A0A182DWH7|A0A182DWH7_HUMAN;P49908|SEPP1_HUMAN			FALSE
DDLYVSDAFHK	60.69	1308.6	11	-2.8	437.206	3	17.4523	4570000	44800000	3817	20210614_HS_50ng_F2-2.raw	7	P01008|ANT3_HUMAN			FALSE
DDNPNLPR	58	939.441	8	-4.7	470.726	2	6.1126	334000000	1850000000	1565	20210614_HS_50ng_F2-2.raw	133	A0A0C4DGB6|A0A0C4DGB6_HUMAN;A0A087WWT3|A0A087WWT3_HUMAN;P02768|ALBU_HUMAN;H7C013|H7C013_HUMAN			FALSE
DDTVC(+57.02)LAK	44.85	920.427	8	-5.4	461.218	2	6.2393	3560000	11000000	1132	20210614_HS_50ng_F2-2.raw	19	P02787|TRFE_HUMAN	Carbamidomethylation	C5:Carbamidomethylation:1000.00	FALSE
DEELSC(+57.02)TVVELK	51.82	1420.68	12	1.4	711.346	2	19.509	217000	2200000	3864	20210614_HS_50ng_F3-2.raw	2	G3V595|G3V595_HUMAN;G3V3A0|G3V3A0_HUMAN;P01011|AACT_HUMAN	Carbamidomethylation	C6:Carbamidomethylation:1000.00	FALSE
DEPTYILNIK	56.25	1204.63	10	0.2	603.324	2	20.4859	503000	6690000	4498	20210614_HS_50ng_F3-1.raw	3	A8MUN2|A8MUN2_HUMAN;P04114|APOB_HUMAN			FALSE
DFALLSLQVPLK	52.42	1342.79	12	0.5	672.401	2	27.9371	157000	1060000	6725	20210614_HS_50ng_F3-1.raw	1	A0A140TA32|A0A140TA32_HUMAN;A0A140TA29|A0A140TA29_HUMAN;P0C0L4|CO4A_HUMAN;P0C0L5|CO4B_HUMAN;A0A0G2JPR0|A0A0G2JPR0_HUMAN;A0A140TA49|A0A140TA49_HUMAN;F5GXS0|F5GXS0_HUMAN;A0A140TA44|A0A140TA44_HUMAN;A0A0G2JL54|A0A0G2JL54_HUMAN			FALSE
DFD(+21.98)FVPPVVR	37.23	1211.6	10	0.6	606.805	2	23.756	154000	1150000	5637	20210614_HS_50ng_F3-1.raw	1	P01024|CO3_HUMAN	Sodium adduct	D3:Sodium adduct:14.04	FALSE
DFDFVPPVVR	70.47	1189.61	10	4.5	595.817	2	24.4984	11700000	58100000	4556	20210614_HS_50ng_F4-2.raw	15	P01024|CO3_HUMAN			FALSE
DFLQSLK	35.54	849.46	7	-2	425.736	2	18.621	40100	597000	4343	20210614_HS_50ng_F2-3.raw	1	A0A0G2JPA8|A0A0G2JPA8_HUMAN;P08697|A2AP_HUMAN			FALSE
DFVQPPTK	53.2	930.481	8	-1.5	466.247	2	8.5277	355000	555000	1740	20210614_HS_50ng_F2-3.raw	2	P01042|KNG1_HUMAN			FALSE
DFYVDENTTVR	42.16	1357.62	11	1.3	679.816	2	16.5371	39100	420000	3195	20210614_HS_50ng_F3-3.raw	1	P29622|KAIN_HUMAN			FALSE
DGAGD(+21.98)VAFVK	45.91	999.464	10	-1.2	500.738	2	7.5415	3820000	11300000	1550	20210614_HS_50ng_F3-1.raw	4	C9JVG0|C9JVG0_HUMAN;P02787|TRFE_HUMAN	Sodium adduct	D5:Sodium adduct:14.77	FALSE
DGAGDVAFVK	63.71	977.482	10	-3.2	489.747	2	11.6523	44900000	269000000	2063	20210614_HS_50ng_F3-3.raw	54	C9JVG0|C9JVG0_HUMAN;P02787|TRFE_HUMAN			FALSE
DGFFGNPR	49.36	908.414	8	-4.4	455.212	2	13.2046	5220000	11600000	2635	20210614_HS_50ng_F2-2.raw	9	P01871|IGHM_HUMAN			FALSE
DGFVQDEGTM(+15.99)FPVGK	56.2	1641.73	15	3	821.877	2	19.6943	273000	1890000	3521	20210614_HS_50ng_F4-2.raw	2	P10643|CO7_HUMAN	Oxidation (M)		FALSE
DGSPD(+21.98)VTTADIGANTPDATK	46.01	1966.87	20	-0.5	656.631	3	15.7316	89200	667000	3205	20210614_HS_50ng_F4-1.raw	1	Q96PD5|PGRP2_HUMAN	Sodium adduct	D5:Sodium adduct:4.08	FALSE
DGSPDVTTADIGANTPDATK	54.89	1944.89	20	-0.5	973.452	2	16.2572	631000	4630000	2919	20210614_HS_50ng_F4-3.raw	3	Q96PD5|PGRP2_HUMAN			FALSE
DGWSAQPTC(+57.02)IK	54.18	1261.58	11	-1.6	631.794	2	15.422	366000	1920000	2879	20210614_HS_50ng_F3-3.raw	2	P08603|CFAH_HUMAN	Carbamidomethylation	C9:Carbamidomethylation:1000.00	FALSE
DGYLFQLLR	59.88	1123.6	9	3.3	562.81	2	25.762	2680000	18900000	6194	20210614_HS_50ng_F3-1.raw	7	P04196|HRG_HUMAN			FALSE
DHAVDLIQK	47.7	1037.55	9	-1.3	519.78	2	7.8651	1830000	6770000	1500	20210614_HS_50ng_F1-2.raw	6	A0A140TA32|A0A140TA32_HUMAN;A0A140TA29|A0A140TA29_HUMAN;P0C0L4|CO4A_HUMAN;P0C0L5|CO4B_HUMAN;A0A0G2JPR0|A0A0G2JPR0_HUMAN;A0A140TA49|A0A140TA49_HUMAN;F5GXS0|F5GXS0_HUMAN;A0A140TA44|A0A140TA44_HUMAN;A0A3B3ISA6|A0A3B3ISA6_HUMAN;A0A0G2JL54|A0A0G2JL54_HUMAN			FALSE
DIAPTLTLYVGK	58.14	1289.72	12	1.8	645.87	2	24.0656	7840000	58800000	5539	20210614_HS_50ng_F3-3.raw	20	P00738|HPT_HUMAN;A0A0A0MRD9|A0A0A0MRD9_HUMAN;J3QLC9|J3QLC9_HUMAN;H3BS21|H3BS21_HUMAN;A0A087WU08|A0A087WU08_HUMAN;H0Y300|H0Y300_HUMAN;A0A0C4DGL8|A0A0C4DGL8_HUMAN;J3QR68|J3QR68_HUMAN;P00739|HPTR_HUMAN			FALSE
DIASGLIGPLIIC(+57.02)K	71.91	1468.83	14	2	735.425	2	26.629	685000	5370000	6132	20210614_HS_50ng_F3-3.raw	4	E9PFZ2|E9PFZ2_HUMAN;P00450|CERU_HUMAN	Carbamidomethylation	C13:Carbamidomethylation:1000.00	FALSE
DIC(+57.02)EEQVN(+0.98)SLPGSITK	27.59	1789.84	16	2.9	895.93	2	18.7028	60700	462000	3512	20210614_HS_50ng_F4-3.raw	1	M0R0Q9|M0R0Q9_HUMAN;P01024|CO3_HUMAN	Carbamidomethylation; Deamidation (NQ)	C3:Carbamidomethylation:1000.00;N8:Deamidation (NQ):32.28	FALSE
DIC(+57.02)EEQVNSLPGSITK	71.23	1788.86	16	1.9	895.437	2	19.0174	3340000	26100000	3568	20210614_HS_50ng_F4-3.raw	8	M0R0Q9|M0R0Q9_HUMAN;P01024|CO3_HUMAN	Carbamidomethylation	C3:Carbamidomethylation:1000.00	FALSE
DIFTGLIGPM(+15.99)K	60.63	1206.63	11	1.7	604.324	2	23.039	6940000	46600000	4710	20210614_HS_50ng_F4-3.raw	8	E9PFZ2|E9PFZ2_HUMAN;H7C5R1|H7C5R1_HUMAN;P00450|CERU_HUMAN	Oxidation (M)		FALSE
DINYVNPVIK	56.43	1173.64	10	2.4	587.828	2	18.9057	1080000	8250000	3840	20210614_HS_50ng_F3-3.raw	3	P01031|CO5_HUMAN			FALSE
DIPM(+15.99)NPM(+15.99)C(+57.02)IYR	44.4	1440.62	11	-0.3	721.317	2	17.0933	1990000	8320000	3305	20210614_HS_50ng_F3-3.raw	3	P01008|ANT3_HUMAN;Q8TCE1|Q8TCE1_HUMAN	Oxidation (M); Oxidation (M); Carbamidomethylation	C8:Carbamidomethylation:1000.00	FALSE
DIPTNSPELEETLTHTITK	67.46	2138.07	19	-9	713.692	3	22.564	4860000	66200000	6014	20210614_HS_50ng_F2-1.raw	5	P01042|KNG1_HUMAN			FALSE
DIQ(+0.98)MTQ(+0.98)SPSSLSASVGDR	38.25	1879.85	18	5.7	627.626	3	14.0371	2590000	8990000	2702	20210614_HS_50ng_F4-3.raw	7	A0A2Q2TTZ9|A0A2Q2TTZ9_HUMAN	Deamidation (NQ); Deamidation (NQ)		FALSE
DIQM(+15.99)TQSPSSLSASVGDR	80.39	1893.87	18	-2.8	947.942	2	16.251	33800000	264000000	2965	20210614_HS_50ng_F4-3.raw	26	A0A2Q2TTZ9|A0A2Q2TTZ9_HUMAN	Oxidation (M)		FALSE
DIQMTQSPSSLSASVGDR	31.41	1877.88	18	-2.6	939.944	2	16.6122	229000	1560000	3400	20210614_HS_50ng_F4-1.raw	3	A0A2Q2TTZ9|A0A2Q2TTZ9_HUMAN			FALSE
DISEVVTPR	46.29	1014.53	9	-0.3	508.274	2	12.9082	3200000	9510000	2444	20210614_HS_50ng_F3-3.raw	8	H7C5H1|H7C5H1_HUMAN;E7ETN3|E7ETN3_HUMAN;P00751|CFAB_HUMAN;B4E1Z4|B4E1Z4_HUMAN			FALSE
DIVM(+15.99)TQSPLSLPVTPGEPASISC(+57.02)R	44.49	2570.27	24	1.8	857.766	3	24.4214	503000	4500000	5064	20210614_HS_50ng_F4-3.raw	3	A0A5H1ZRS2|A0A5H1ZRS2_HUMAN	Oxidation (M); Carbamidomethylation	C23:Carbamidomethylation:1000.00	FALSE
DKDQEVLLQTFLDDASPGDK	67.48	2233.07	20	1.6	745.367	3	26.035	612000	5640000	6010	20210614_HS_50ng_F3-3.raw	3	A8MUN2|A8MUN2_HUMAN;P04114|APOB_HUMAN			FALSE
DKDQEVLLQTFLDDASPGDKR	70.99	2389.18	21	2.5	797.401	3	26.0055	247000	3770000	6285	20210614_HS_50ng_F2-2.raw	3	A8MUN2|A8MUN2_HUMAN;P04114|APOB_HUMAN			FALSE
DLATVYVD(+21.98)VLK	41.13	1256.66	11	4.8	629.342	2	23.7016	64000	540000	5623	20210614_HS_50ng_F3-1.raw	1	P02647|APOA1_HUMAN	Sodium adduct	D8:Sodium adduct:40.63	FALSE
DLATVYVDVLK	58.08	1234.68	11	-0.9	618.347	2	23.8712	8550000	75400000	5470	20210614_HS_50ng_F3-3.raw	5	P02647|APOA1_HUMAN			FALSE
DLC(+57.02)GC(+57.02)YSVSSVLPGC(+57.02)AEPWNHGK	40.83	2592.12	23	3	865.05	3	23.3241	109000	1440000	5492	20210614_HS_50ng_F3-1.raw	1	P01876|IGHA1_HUMAN;A0A286YEY1|A0A286YEY1_HUMAN	Carbamidomethylation; Carbamidomethylation; Carbamidomethylation	C3:Carbamidomethylation:1000.00;C5:Carbamidomethylation:1000.00;C15:Carbamidomethylation:1000.00	FALSE
DLGEE(+21.98)NFK	43.87	972.416	8	-0.7	487.215	2	6.2064	78500000	311000000	1240	20210614_HS_50ng_F2-1.raw	22	A0A0C4DGB6|A0A0C4DGB6_HUMAN;A0A087WWT3|A0A087WWT3_HUMAN;P02768|ALBU_HUMAN;H7C013|H7C013_HUMAN;C9JKR2|C9JKR2_HUMAN;B7WNR0|B7WNR0_HUMAN	Sodium adduct	E5:Sodium adduct:9.34	FALSE
DLGEENFK	46.92	950.434	8	-0.2	476.224	2	13.1177	202000000	1270000000	2590	20210614_HS_50ng_F3-1.raw	105	A0A0C4DGB6|A0A0C4DGB6_HUMAN;A0A087WWT3|A0A087WWT3_HUMAN;P02768|ALBU_HUMAN;H7C013|H7C013_HUMAN;C9JKR2|C9JKR2_HUMAN;B7WNR0|B7WNR0_HUMAN			FALSE
DLKVEDIPLAR	45.12	1267.71	11	0.2	423.579	3	20.4285	454000	4550000	4774	20210614_HS_50ng_F2-2.raw	5	P04114|APOB_HUMAN			FALSE
DLLFRDDTVC(+57.02)LAK	57.32	1564.79	13	4.2	783.407	2	21.998	4260000	38700000	5528	20210614_HS_50ng_F2-3.raw	6	P02787|TRFE_HUMAN	Carbamidomethylation	C10:Carbamidomethylation:1000.00	FALSE
DLTGFPGPLN(+0.98)DQDN(+0.98)EDC(+57.02)INR	79.37	2290.96	20	5.2	764.666	3	21.7699	33300	864000	4340	20210614_HS_50ng_F4-3.raw	4	P01023|A2MG_HUMAN	Deamidation (NQ); Deamidation (NQ); Carbamidomethylation	N10:Deamidation (NQ):0.00;N14:Deamidation (NQ):32.28;C17:Carbamidomethylation:1000.00	FALSE
DLTGFPGPLNDQDN(+0.98)EDC(+57.02)INR	65.83	2289.98	20	0.4	764.335	3	21.6254	3140000	21500000	4828	20210614_HS_50ng_F4-1.raw	8	P01023|A2MG_HUMAN	Deamidation (NQ); Carbamidomethylation	N14:Deamidation (NQ):20.41;C17:Carbamidomethylation:1000.00	FALSE
DM(+15.99)YSFLEDM(+15.99)GLK	58.84	1479.63	12	-2.9	740.818	2	20.8749	15900000	132000000	4468	20210614_HS_50ng_F3-3.raw	18	P01023|A2MG_HUMAN	Oxidation (M); Oxidation (M)		FALSE
DNELLVYK	55.79	992.518	8	-2	497.265	2	14.6367	1040000	2870000	2876	20210614_HS_50ng_F3-1.raw	4	P02743|SAMP_HUMAN			FALSE
DNVFDGLVR	48.31	1033.52	9	2.7	517.768	2	19.6973	1740000	10700000	4962	20210614_HS_50ng_F2-1.raw	5	P04114|APOB_HUMAN			FALSE
DPN(+0.98)GLPPEAQK	38.14	1165.56	11	-6.7	583.784	2	6.6655	180000	546000	1183	20210614_HS_50ng_F3-2.raw	3	Q5VY30|Q5VY30_HUMAN;P02753|RET4_HUMAN	Deamidation (NQ)	N3:Deamidation (NQ):43.57	FALSE
DPNGLPPEAQK	47.49	1164.58	11	-1.2	583.295	2	6.668			1184	20210614_HS_50ng_F3-2.raw	1	Q5VY30|Q5VY30_HUMAN;P02753|RET4_HUMAN			FALSE
DPTFIPAPIQAK	70.34	1296.71	12	1.2	649.362	2	20.6735	3350000	28300000	4425	20210614_HS_50ng_F3-3.raw	4	P01019|ANGT_HUMAN			FALSE
DQIVDLTVGNNK	43.96	1314.68	12	-2.3	658.345	2	17.5241	231000	2030000	3428	20210614_HS_50ng_F3-3.raw	1	P35527|K1C9_HUMAN			FALSE
DQYELLC(+57.02)LDNTR	70.22	1538.7	12	-0.7	770.359	2	20.9714	3910000	44900000	4119	20210614_HS_50ng_F4-3.raw	8	C9JVG0|C9JVG0_HUMAN;P02787|TRFE_HUMAN	Carbamidomethylation	C7:Carbamidomethylation:1000.00	FALSE
DSAHGFLK	46.92	873.434	8	-1.7	437.723	2	6.6342	3080000	3320000	1151	20210614_HS_50ng_F1-2.raw	4	P02787|TRFE_HUMAN			FALSE
DSC(+57.02)VGSLVVK	55.26	1062.54	10	-1.4	532.275	2	13.884	7430000	14000000	2829	20210614_HS_50ng_F2-2.raw	9	P01024|CO3_HUMAN	Carbamidomethylation	C3:Carbamidomethylation:1000.00	FALSE
DSFHLDEQFTVPVEM(+15.99)M(+15.99)QAR	45.69	2311.02	19	6.4	771.354	3	23.4485	74500	750000	4967	20210614_HS_50ng_F3-2.raw	1	A0A0G2JPA8|A0A0G2JPA8_HUMAN;C9JPV4|C9JPV4_HUMAN;A0A0J9YWQ3|A0A0J9YWQ3_HUMAN;P08697|A2AP_HUMAN	Oxidation (M); Oxidation (M)		FALSE
DSGFQM(+15.99)NQLR	56.7	1210.54	10	-1.7	606.276	2	7.1078	31500000	236000000	1320	20210614_HS_50ng_F3-3.raw	44	P02787|TRFE_HUMAN	Oxidation (M)		FALSE
DSGRDYVSQFEGSALGK	41.16	1814.84	17	1.2	605.956	3	19.5989	442000	4240000	4680	20210614_HS_50ng_F2-3.raw	3	P02647|APOA1_HUMAN			FALSE
DSPVLIDFFEDTER	61.23	1681.78	14	3.4	841.902	2	27.507	552000	3790000	5669	20210614_HS_50ng_F4-3.raw	4	P04196|HRG_HUMAN			FALSE
DSTYSLSSTLTLSK	73.46	1501.75	14	-0.8	751.882	2	20.2241	44800000	296000000	3314	20210614_HS_50ng_F5-1.raw	27	A0A5H1ZRQ3|A0A5H1ZRQ3_HUMAN;P01834|IGKC_HUMAN			FALSE
DTDTGALLFIGK	57.35	1249.66	12	0.6	625.835	2	22.226	569000	4150000	4934	20210614_HS_50ng_F3-3.raw	2	P36955|PEDF_HUMAN			FALSE
DTEEED(+21.98)FHVDQVTTVK	48.68	1912.83	16	0.5	638.618	3	17.4116	131000	4080000	4185	20210614_HS_50ng_F2-1.raw	2		Sodium adduct	D6:Sodium adduct:0.00	FALSE
DTEEEDFHVD(+21.98)QVTTVK	49.18	1912.83	16	0.2	957.423	2	17.3657	87200	2930000	4158	20210614_HS_50ng_F2-1.raw	1		Sodium adduct	D10:Sodium adduct:11.94	FALSE
DTEEEDFHVDQATTVK	79.3	1862.82	16	0.7	932.416	2	16.0217	43100000	242000000	3437	20210614_HS_50ng_F2-3.raw	17				FALSE
DTEEEDFHVDQVTTVK	75.88	1890.85	16	0.6	946.432	2	18.0516	29800000	390000000	4008	20210614_HS_50ng_F2-2.raw	29				FALSE
DTSC(+57.02)VNPPTVQNAYIVSR	35.3	2019.97	18	0.7	1010.99	2	19.2512	59400	560000	3653	20210614_HS_50ng_F4-3.raw	1	P08603|CFAH_HUMAN	Carbamidomethylation	C4:Carbamidomethylation:1000.00	FALSE
DTSISTAYM(+15.99)ELSR	46.73	1488.68	13	0.3	745.346	2	18.9595	523000	3210000	3963	20210614_HS_50ng_F3-1.raw	4	P23083|HV102_HUMAN	Oxidation (M)		FALSE
DTVIKPLLVEPEGLEK	66.37	1779	16	-2.8	594.007	3	22.9202	14500000	117000000	6129	20210614_HS_50ng_F2-1.raw	10	P01023|A2MG_HUMAN			FALSE
DTWVEHWPEEDEC(+57.02)QDEENQK	67.71	2602.02	20	-0.3	868.347	3	19.4959	2230000	19200000	4169	20210614_HS_50ng_F3-1.raw	4	P01024|CO3_HUMAN	Carbamidomethylation	C13:Carbamidomethylation:1000.00	FALSE
DVFLGM(+15.99)FLYEYAR	62.56	1638.78	13	5.1	820.399	2	28.3945	2210000	14000000	6457	20210614_HS_50ng_F3-3.raw	4	A0A0C4DGB6|A0A0C4DGB6_HUMAN;P02768|ALBU_HUMAN;C9JKR2|C9JKR2_HUMAN;D6RHD5|D6RHD5_HUMAN;B7WNR0|B7WNR0_HUMAN;H0YA55|H0YA55_HUMAN	Oxidation (M)		FALSE
DVM(+15.99)QGTDEHVVC(+57.02)K	44.4	1532.66	13	-2	767.336	2	5.7554	228000	988000	949	20210614_HS_50ng_F2-3.raw	3	P01871|IGHM_HUMAN	Oxidation (M); Carbamidomethylation	C12:Carbamidomethylation:1000.00	FALSE
DVVLFEK	33.12	848.464	7	0.6	425.24	2	16.8704	1070000	3160000	3700	20210614_HS_50ng_F2-3.raw	3	A6PVI2|A6PVI2_HUMAN;Q5TEH5|Q5TEH5_HUMAN;P00747|PLMN_HUMAN			FALSE
DVWGIEGPIDAAFTR	66.48	1645.81	15	-0.7	823.912	2	26.3415	310000	2110000	6093	20210614_HS_50ng_F4-1.raw	2	P04004|VTNC_HUMAN			FALSE
DWHGVPGQVDAAM(+15.99)AGR	64.06	1681.76	16	1.9	561.596	3	16.2269	6900000	37200000	3789	20210614_HS_50ng_F2-1.raw	4	P04004|VTNC_HUMAN	Oxidation (M)		FALSE
DYELLC(+57.02)LDGTR	63.47	1353.62	11	1	677.82	2	20.8241	577000	4840000	4542	20210614_HS_50ng_F4-1.raw	5	P02787|TRFE_HUMAN	Carbamidomethylation	C6:Carbamidomethylation:1000.00	FALSE
DYFM(+15.99)PC(+57.02)PGR	52.38	1157.46	9	2.1	579.74	2	13.9216	11000000	65800000	2833	20210614_HS_50ng_F2-3.raw	23	P02790|HEMO_HUMAN;Q9BS19|Q9BS19_HUMAN	Oxidation (M); Carbamidomethylation	C6:Carbamidomethylation:1000.00	FALSE
DYIEFNK	37.75	927.434	7	-0.9	464.724	2	14.9549	391000	1770000	3132	20210614_HS_50ng_F2-3.raw	2	C9JEV0|C9JEV0_HUMAN;P25311|ZA2G_HUMAN			FALSE
DYVSQ(+0.98)FEGSALGK	49.89	1400.65	13	-7.6	701.325	2	21.2915	256000	3300000	4622	20210614_HS_50ng_F3-3.raw	3	P02647|APOA1_HUMAN	Deamidation (NQ)		FALSE
DYVSQFEGSALGK	71.77	1399.66	13	-2.2	700.837	2	20.3315	8600000	97100000	3649	20210614_HS_50ng_F4-2.raw	17	P02647|APOA1_HUMAN			FALSE
E(+21.98)DIPPADLSDQ(+0.98)VPDTESETR	37.2	2235.96	20	6	746.333	3	19.912	322000	882000	4199	20210614_HS_50ng_F4-1.raw	1	P01024|CO3_HUMAN	Sodium adduct; Deamidation (NQ)	E1:Sodium adduct:0.00;Q11:Deamidation (NQ):1000.00	FALSE
E(+21.98)PQVYTLPPSR	39.42	1307.65	11	-3.3	436.889	3	15.4391	5270000	17200000	3072	20210614_HS_50ng_F3-1.raw	7	P01859|IGHG2_HUMAN;A0A4W9A917|A0A4W9A917_HUMAN;P01857|IGHG1_HUMAN;P01860|IGHG3_HUMAN;A0A286YEY4|A0A286YEY4_HUMAN;A0A0A0MS08|A0A0A0MS08_HUMAN;A0A0A0MS07|A0A0A0MS07_HUMAN;A0A286YES1|A0A286YES1_HUMAN	Sodium adduct	E1:Sodium adduct:51.38	FALSE
E(-18.01)ATLQD(+21.98)C(+57.02)PSGPWGK	37.04	1548.66	14	0.7	775.34	2	17.3454	9060	248000	3406	20210614_HS_50ng_F3-3.raw	1		Pyro-glu from E; Sodium adduct; Carbamidomethylation	E1:Pyro-glu from E:1000.00;D6:Sodium adduct:36.20;C7:Carbamidomethylation:1000.00	FALSE
E(-18.01)D(+21.98)PQ(+0.98)TFYYAVAVVK	46.05	1633.76	14	-3.7	817.886	2	23.2031	13700	588000	5465	20210614_HS_50ng_F3-1.raw	1	P02787|TRFE_HUMAN	Pyro-glu from E; Sodium adduct; Deamidation (NQ)	E1:Pyro-glu from E:1000.00;D2:Sodium adduct:96.93;Q4:Deamidation (NQ):1000.00	FALSE
E(-18.01)DPQ(+0.98)TFYYAVAVVK	44.07	1611.78	14	9.1	806.906	2	25.1834	80400	665000	5815	20210614_HS_50ng_F3-3.raw	1	P02787|TRFE_HUMAN	Pyro-glu from E; Deamidation (NQ)		FALSE
E(-18.01)DPQTFYYAVAVVK	67.62	1610.8	14	4	806.409	2	25.1844	138000	1160000	5815	20210614_HS_50ng_F3-3.raw	2	P02787|TRFE_HUMAN	Pyro-glu from E		FALSE
E(-18.01)FQLFSSPHGK	60.33	1257.61	11	2.1	629.816	2	21.8414	2200000	17600000	4808	20210614_HS_50ng_F3-3.raw	11	P02787|TRFE_HUMAN	Pyro-glu from E		FALSE
E(-18.01)GYYGYTGAFR	58.64	1264.55	11	2.8	633.285	2	20.393	338000	3220000	3663	20210614_HS_50ng_F4-2.raw	3	H7C5E8|H7C5E8_HUMAN;P02787|TRFE_HUMAN	Pyro-glu from E		FALSE
E(-18.01)HAVEGDC(+57.02)DFQ(+0.98)LLK	41.16	1642.73	14	7.9	822.379	2	20.3043			4449	20210614_HS_50ng_F3-1.raw	1	P02765|FETUA_HUMAN;C9JV77|C9JV77_HUMAN	Pyro-glu from E; Carbamidomethylation; Deamidation (NQ)	C8:Carbamidomethylation:1000.00	FALSE
E(-18.01)HAVEGDC(+57.02)DFQLLK	39.95	1641.75	14	2.5	821.882	2	20.5311	359000	4210000	4384	20210614_HS_50ng_F3-3.raw	3	P02765|FETUA_HUMAN;C9JV77|C9JV77_HUMAN	Pyro-glu from E; Carbamidomethylation	C8:Carbamidomethylation:1000.00	FALSE
E(-18.01)IGELYLPK	36.51	1042.57	9	1.7	522.293	2	22.9424	27900	328000	4691	20210614_HS_50ng_F4-3.raw	1	G3V3A0|G3V3A0_HUMAN;P01011|AACT_HUMAN	Pyro-glu from E		FALSE
E(-18.01)PQVYTLPPSR	62.58	1267.66	11	6.2	634.839	2	18.5189	1600000	3750000	3456	20210614_HS_50ng_F4-3.raw	5	P01859|IGHG2_HUMAN;A0A4W9A917|A0A4W9A917_HUMAN;P01857|IGHG1_HUMAN;P01860|IGHG3_HUMAN;A0A286YEY4|A0A286YEY4_HUMAN;A0A0A0MS08|A0A0A0MS08_HUMAN;A0A0A0MS07|A0A0A0MS07_HUMAN;A0A286YES1|A0A286YES1_HUMAN	Pyro-glu from E		FALSE
E(-18.01)QLSLLDR	41.32	954.513	8	1.6	478.265	2	19.5705	39000	350000	3744	20210614_HS_50ng_F4-3.raw	1	G3V595|G3V595_HUMAN;P01011|AACT_HUMAN	Pyro-glu from E		FALSE
E(-18.01)TAASLLQAGYK	43.87	1232.64	12	-2.4	617.326	2	19.8246			4241	20210614_HS_50ng_F4-1.raw	2	P00734|THRB_HUMAN	Pyro-glu from E		FALSE
E(-18.01)VQLVE(+21.98)SGGGLVQPGGSLR	48.36	1884.97	19	-1.7	943.489	2	23.2098	202000	2010000	3884	20210614_HS_50ng_F5-1.raw	2		Pyro-glu from E; Sodium adduct	E1:Pyro-glu from E:1000.00;E6:Sodium adduct:38.29	FALSE
E(-18.01)VQLVESGGGLVQPGGSLR	92.93	1862.98	19	0.1	932.5	2	23.8466	2020000	16800000	3840	20210614_HS_50ng_F5-2.raw	9		Pyro-glu from E		FALSE
EAGIPEFYDYDVALIK	58.33	1841.91	16	1.9	921.963	2	26.5474	1290000	8000000	6411	20210614_HS_50ng_F3-1.raw	3	H7C5H1|H7C5H1_HUMAN;E7ETN3|E7ETN3_HUMAN;P00751|CFAB_HUMAN;A0A0G2JH38|A0A0G2JH38_HUMAN;B4E1Z4|B4E1Z4_HUMAN			FALSE
EAQLPVIENK	51.04	1139.62	10	1.1	570.817	2	15.9185	7090000	31400000	3320	20210614_HS_50ng_F2-2.raw	7	P00747|PLMN_HUMAN			FALSE
EATLQDC(+57.02)PSGPWGK	58.76	1544.69	14	2	773.355	2	17.4054	89400	1050000	3406	20210614_HS_50ng_F3-3.raw	2		Carbamidomethylation	C7:Carbamidomethylation:1000.00	FALSE
ED(+21.98)PQTFYYAVAVVK	48.5	1650.79	14	0.8	551.271	3	23.0692	175000	3140000	5399	20210614_HS_50ng_F3-1.raw	2	P02787|TRFE_HUMAN	Sodium adduct	D2:Sodium adduct:0.00	FALSE
EDIFM(+15.99)ETLK	37.51	1140.54	9	3.3	571.278	2	19.1212	1930000	13400000	4546	20210614_HS_50ng_F2-3.raw	4	C9JEV0|C9JEV0_HUMAN;P25311|ZA2G_HUMAN	Oxidation (M)		FALSE
EDIPPAD(+21.98)LSDQVPDTESETR	35.94	2234.98	20	0.2	746	3	20.4462			4427	20210614_HS_50ng_F4-1.raw	1	P01024|CO3_HUMAN	Sodium adduct	D7:Sodium adduct:0.00	FALSE
EDIPPADLSD(+21.98)QVPDTESETR	83.03	2234.98	20	-4.8	745.997	3	18.5979	2820000	11200000	4004	20210614_HS_50ng_F4-1.raw	5	P01024|CO3_HUMAN	Sodium adduct	D10:Sodium adduct:14.84	FALSE
EDIPPADLSDQ(+0.98)VPDTESETR	50.66	2213.98	20	5.9	739.005	3	18.8917	2040000	13000000	3599	20210614_HS_50ng_F4-3.raw	3	P01024|CO3_HUMAN	Deamidation (NQ)		FALSE
EDIPPADLSDQVPDTESETR	89.98	2213	20	-2.2	738.671	3	18.5979	25200000	100000000	3997	20210614_HS_50ng_F4-1.raw	20	P01024|CO3_HUMAN			FALSE
EDPQTFYYAVAVVK	69.48	1628.81	14	4.1	815.415	2	24.5704	18800000	256000000	5666	20210614_HS_50ng_F3-3.raw	31	P02787|TRFE_HUMAN			FALSE
EDTPNSVWEPAK	64.81	1371.63	12	-3.4	686.82	2	15.3205	219000	1190000	2868	20210614_HS_50ng_F3-3.raw	2	A0A087X232|A0A087X232_HUMAN;F8WCZ6|F8WCZ6_HUMAN;P09871|C1S_HUMAN			FALSE
EDVYVVGTVLR	71.1	1248.67	11	-5.1	625.34	2	20.6418	3420000	35600000	4396	20210614_HS_50ng_F3-3.raw	10	P04003|C4BPA_HUMAN			FALSE
EELLPAQDIK	53.94	1154.62	10	3.4	578.318	2	17.4224	1410000	7760000	3404	20210614_HS_50ng_F3-3.raw	3	H7C5H1|H7C5H1_HUMAN;E7ETN3|E7ETN3_HUMAN;P00751|CFAB_HUMAN;B4E1Z4|B4E1Z4_HUMAN			FALSE
EENFYVDETTVVK	59.43	1571.74	13	2.1	786.877	2	18.696	568000	6250000	3910	20210614_HS_50ng_F3-1.raw	2	P08185|CBG_HUMAN			FALSE
EESSSGSSHAVM(+15.99)DISLPTGISANEEDLK	71.3	2905.31	28	0.5	969.446	3	21.7194	1000000	12200000	4770	20210614_HS_50ng_F3-3.raw	3	P01031|CO5_HUMAN	Oxidation (M)		FALSE
EFN(+0.98)AETFTFHADIC(+57.02)TLSEK	37.35	2260	19	8.8	754.347	3	26.4441	364000	546000	7281	20210614_HS_50ng_F2-1.raw	1	A0A0C4DGB6|A0A0C4DGB6_HUMAN;A0A087WWT3|A0A087WWT3_HUMAN;P02768|ALBU_HUMAN;C9JKR2|C9JKR2_HUMAN;D6RHD5|D6RHD5_HUMAN;B7WNR0|B7WNR0_HUMAN;H0YA55|H0YA55_HUMAN	Deamidation (NQ); Carbamidomethylation	C14:Carbamidomethylation:1000.00	FALSE
EFNAETFTFHADIC(+57.02)TLSEK	73.5	2259.02	19	-3.7	754.01	3	24.3762	8580000	50200000	6661	20210614_HS_50ng_F2-1.raw	15	A0A0C4DGB6|A0A0C4DGB6_HUMAN;A0A087WWT3|A0A087WWT3_HUMAN;P02768|ALBU_HUMAN;C9JKR2|C9JKR2_HUMAN;D6RHD5|D6RHD5_HUMAN;B7WNR0|B7WNR0_HUMAN;H0YA55|H0YA55_HUMAN	Carbamidomethylation	C14:Carbamidomethylation:1000.00	FALSE
EFQLFSSPHGK	58.17	1275.62	11	-0.6	638.819	2	18.6701	17400000	161000000	3894	20210614_HS_50ng_F1-1.raw	25	P02787|TRFE_HUMAN			FALSE
EFQVPTFTIPK	54.11	1305.7	11	3.7	653.858	2	24.6132	2330000	16000000	5881	20210614_HS_50ng_F3-1.raw	5	P04114|APOB_HUMAN			FALSE
EFTPPVQAAYQK	59.9	1377.69	12	-0.2	689.854	2	17.8678	1640000	11500000	3425	20210614_HS_50ng_F3-2.raw	4	P68871|HBB_HUMAN			FALSE
EGM(+15.99)LSIM(+15.99)SYR	44.11	1217.54	10	2.6	609.78	2	15.6346	707000	2970000	3317	20210614_HS_50ng_F2-3.raw	3	P01031|CO5_HUMAN	Oxidation (M); Oxidation (M)		FALSE
EGTC(+57.02)PE(+21.98)APTDEC(+57.02)KPVK	48.4	1838.78	16	-3.6	613.931	3	7.0771	364000	4000000	1302	20210614_HS_50ng_F2-3.raw	2	P02787|TRFE_HUMAN	Carbamidomethylation; Sodium adduct; Carbamidomethylation	C4:Carbamidomethylation:1000.00;E6:Sodium adduct:7.38;C12:Carbamidomethylation:1000.00	FALSE
EGTC(+57.02)PEAPTDEC(+57.02)KPVK	58.59	1816.8	16	-1.2	606.606	3	7.0628	12800000	60000000	1293	20210614_HS_50ng_F2-3.raw	6	P02787|TRFE_HUMAN	Carbamidomethylation; Carbamidomethylation	C4:Carbamidomethylation:1000.00;C12:Carbamidomethylation:1000.00	FALSE
EGVQKEDIPPADLSDQVPDTESETR	68.18	2754.28	25	-0.4	919.101	3	18.8078	10100000	26200000	3958	20210614_HS_50ng_F3-3.raw	5	P01024|CO3_HUMAN			FALSE
EGYYGYTGAFR	61.23	1282.56	11	-5.7	642.284	2	18.4281	83000000	394000000	4285	20210614_HS_50ng_F2-3.raw	71	H7C5E8|H7C5E8_HUMAN;P02787|TRFE_HUMAN			FALSE
EHAVEGDC(+57.02)DFQLLK	71.29	1659.76	14	-0.8	554.259	3	19.6922	3770000	51600000	4542	20210614_HS_50ng_F2-2.raw	8	P02765|FETUA_HUMAN;C9JV77|C9JV77_HUMAN	Carbamidomethylation	C8:Carbamidomethylation:1000.00	FALSE
EHLVQATPENLQEAR	66.11	1733.87	15	1.6	578.965	3	15.6727	570000	2810000	3295	20210614_HS_50ng_F2-2.raw	3	E7ET33|E7ET33_HUMAN;A0A087WW43|A0A087WW43_HUMAN;Q06033|ITIH3_HUMAN			FALSE
EIEEVLTPEM(+15.99)LM(+15.99)R	37.68	1620.77	13	0.2	811.394	2	20.6395	428000	4150000	4188	20210614_HS_50ng_F3-2.raw	4	P29622|KAIN_HUMAN	Oxidation (M); Oxidation (M)		FALSE
EIETYHNLLEGGQ(+0.98)EDFESSGAGK	61.08	2510.11	23	9.2	837.718	3	21.0198			5182	20210614_HS_50ng_F2-3.raw	1	K7EQQ3|K7EQQ3_HUMAN;P35527|K1C9_HUMAN	Deamidation (NQ)	Q13:Deamidation (NQ):9.45	FALSE
EIETYHNLLEGGQEDFESSGAGK	70.42	2509.12	23	3	837.385	3	20.7451	2410000	22000000	5344	20210614_HS_50ng_F2-1.raw	3	K7EQQ3|K7EQQ3_HUMAN;P35527|K1C9_HUMAN			FALSE
EIGELYLPK	50.12	1060.58	9	1.9	531.298	2	19.3714	14600000	84700000	4985	20210614_HS_50ng_F2-1.raw	7	G3V3A0|G3V3A0_HUMAN;P01011|AACT_HUMAN			FALSE
EILSVDC(+57.02)STNNPSQAK	58.7	1761.82	16	-0.2	881.917	2	15.3179	721000	3290000	2820	20210614_HS_50ng_F3-2.raw	3	P10909|CLUS_HUMAN;H0YC35|H0YC35_HUMAN	Carbamidomethylation	C7:Carbamidomethylation:1000.00	FALSE
EIM(+15.99)ENYNIALR	58.32	1380.67	11	-4.1	691.34	2	18.2768	4660000	37400000	3817	20210614_HS_50ng_F4-1.raw	10	P08603|CFAH_HUMAN	Oxidation (M)		FALSE
EIPAWVPFDPAAQITK	29.38	1781.94	16	2.7	891.977	2	27.0758	265000	2180000	6544	20210614_HS_50ng_F3-1.raw	2	C9JEV0|C9JEV0_HUMAN;P25311|ZA2G_HUMAN			FALSE
EKLQDEDLGFL	29.72	1305.65	11	0.9	653.83	2	21.9589	341000	2170000	5018	20210614_HS_50ng_F3-1.raw	2	H7C5H1|H7C5H1_HUMAN;E7ETN3|E7ETN3_HUMAN;P00751|CFAB_HUMAN;B4E1Z4|B4E1Z4_HUMAN			FALSE
ELDESLQVAER	53.07	1287.63	11	-2.4	644.821	2	13.4928	5630000	32900000	2695	20210614_HS_50ng_F3-1.raw	10	H0YAS8|H0YAS8_HUMAN;P10909|CLUS_HUMAN;H0YC35|H0YC35_HUMAN			FALSE
ELLDTVTAPQK	53.06	1213.66	11	-0.4	607.835	2	14.6367	824000	3950000	2887	20210614_HS_50ng_F3-1.raw	3	I3L4Z0|I3L4Z0_HUMAN;P36955|PEDF_HUMAN			FALSE
ELLESYIDGR	42.7	1193.59	10	1.9	597.805	2	18.6763	125000	1450000	3788	20210614_HS_50ng_F3-3.raw	4	P00734|THRB_HUMAN;E9PIT3|E9PIT3_HUMAN			FALSE
ELSHLPSLYDYSAYR	46.74	1812.87	15	2.4	605.298	3	23.0605	59600	537000	5603	20210614_HS_50ng_F2-2.raw	1	P10643|CO7_HUMAN			FALSE
ELSYYSLEDLNNK	53.67	1586.75	13	-0.1	794.38	2	20.8316	95400	1520000	4608	20210614_HS_50ng_F3-1.raw	2	P01031|CO5_HUMAN			FALSE
ELTTEIDNNIEQISSYK	49.5	1995.96	17	1.9	998.991	2	22.4103	283000	3710000	4525	20210614_HS_50ng_F4-3.raw	5	#CONTAM#cont|000133|;#CONTAM#cont|000131|;P13645|K1C10_HUMAN;#CONTAM#cont|000129|;#CONTAM#cont|000136|;#CONTAM#cont|000122|;#CONTAM#cont|000130|			FALSE
EM(+15.99)SGSPASGIPVK	47.46	1274.62	13	-2.2	638.315	2	10.3375	4040000	18500000	2003	20210614_HS_50ng_F2-3.raw	8	A0A140TA32|A0A140TA32_HUMAN;A0A140TA29|A0A140TA29_HUMAN;P0C0L4|CO4A_HUMAN;P0C0L5|CO4B_HUMAN;A0A0G2JPR0|A0A0G2JPR0_HUMAN;A0A140TA49|A0A140TA49_HUMAN;F5GXS0|F5GXS0_HUMAN;A0A140TA44|A0A140TA44_HUMAN;A0A0G2JL54|A0A0G2JL54_HUMAN	Oxidation (M)		FALSE
ENEGFTVTAEGK	52.67	1280.59	12	-0.9	641.301	2	8.5168	279000	700000	1580	20210614_HS_50ng_F3-3.raw	1	P01024|CO3_HUMAN;M0QYC8|M0QYC8_HUMAN			FALSE
ENFAGEATLQR	51.93	1234.59	11	-2.1	618.303	2	13.3937	1940000	9760000	2722	20210614_HS_50ng_F2-2.raw	6	P04114|APOB_HUMAN			FALSE
ENFLFLTPDC(+57.02)K	57.32	1382.65	11	2.1	692.336	2	23.4724	1110000	13000000	6024	20210614_HS_50ng_F2-3.raw	5	P01042|KNG1_HUMAN	Carbamidomethylation	C10:Carbamidomethylation:1000.00	FALSE
EPFLSC(+57.02)C(+57.02)QFAESLR	35.76	1742.78	14	-0.2	872.395	2	23.0109	161000	1010000	5193	20210614_HS_50ng_F3-3.raw	1	A0A140TA32|A0A140TA32_HUMAN;A0A140TA29|A0A140TA29_HUMAN;P0C0L4|CO4A_HUMAN;P0C0L5|CO4B_HUMAN;A0A0G2JPR0|A0A0G2JPR0_HUMAN;A0A140TA49|A0A140TA49_HUMAN;F5GXS0|F5GXS0_HUMAN;A0A140TA44|A0A140TA44_HUMAN;A0A3B3ISA6|A0A3B3ISA6_HUMAN;A0A0G2JL54|A0A0G2JL54_HUMAN	Carbamidomethylation; Carbamidomethylation	C6:Carbamidomethylation:1000.00;C7:Carbamidomethylation:1000.00	FALSE
EPQ(+0.98)VYTLPPSR	36.7	1286.65	11	0	644.333	2	21.0115	170000	836000	4378	20210614_HS_50ng_F3-2.raw	1	P01859|IGHG2_HUMAN;A0A4W9A917|A0A4W9A917_HUMAN;P01857|IGHG1_HUMAN;P01860|IGHG3_HUMAN;A0A286YEY4|A0A286YEY4_HUMAN;A0A0A0MS08|A0A0A0MS08_HUMAN;A0A0A0MS07|A0A0A0MS07_HUMAN;A0A286YES1|A0A286YES1_HUMAN	Deamidation (NQ)		FALSE
EPQVYTLPPSR	60.89	1285.67	11	1.5	643.842	2	16.7962	56300000	217000000	3724	20210614_HS_50ng_F2-2.raw	57	P01859|IGHG2_HUMAN;A0A4W9A917|A0A4W9A917_HUMAN;P01857|IGHG1_HUMAN;P01860|IGHG3_HUMAN;A0A286YEY4|A0A286YEY4_HUMAN;A0A0A0MS08|A0A0A0MS08_HUMAN;A0A0A0MS07|A0A0A0MS07_HUMAN;A0A286YES1|A0A286YES1_HUMAN			FALSE
EPQVYTLPPSRDELTK	56.35	1871.96	16	1.7	624.996	3	18.3781	32400000	154000000	4441	20210614_HS_50ng_F2-1.raw	11	P01857|IGHG1_HUMAN;A0A0A0MS08|A0A0A0MS08_HUMAN;A0A0A0MS07|A0A0A0MS07_HUMAN			FALSE
EPQVYTLPPSREEM(+15.99)TK	52.36	1919.93	16	-3.1	640.982	3	16.2831	47100000	154000000	3576	20210614_HS_50ng_F2-2.raw	8	P01859|IGHG2_HUMAN;A0A4W9A917|A0A4W9A917_HUMAN;P01860|IGHG3_HUMAN;A0A286YEY4|A0A286YEY4_HUMAN;A0A286YES1|A0A286YES1_HUMAN	Oxidation (M)		FALSE
EQHLFLPFSYK	56.25	1407.72	11	-0.1	470.247	3	23.659	57600	501000	5235	20210614_HS_50ng_F1-1.raw	1	A8MUN2|A8MUN2_HUMAN;P04114|APOB_HUMAN			FALSE
EQLGEFYEALDC(+57.02)LR	54.67	1741.8	14	1.3	871.908	2	25.8686	654000	6920000	5963	20210614_HS_50ng_F3-3.raw	3	P02763|A1AG1_HUMAN	Carbamidomethylation	C12:Carbamidomethylation:1000.00	FALSE
EQLGPVTQEFWDNLEK	54.13	1931.93	16	1.3	966.972	2	25.8808	813000	6120000	5964	20210614_HS_50ng_F3-3.raw	3	F8W696|F8W696_HUMAN;P02647|APOA1_HUMAN			FALSE
EQLKAVM(+15.99)DDFAAFVEK	35.84	1855.9	16	1.2	619.642	3	23.8173	251000	4970000	5795	20210614_HS_50ng_F2-2.raw	4	A0A0C4DGB6|A0A0C4DGB6_HUMAN;A0A087WWT3|A0A087WWT3_HUMAN;P02768|ALBU_HUMAN;C9JKR2|C9JKR2_HUMAN;D6RHD5|D6RHD5_HUMAN;B7WNR0|B7WNR0_HUMAN;H0YA55|H0YA55_HUMAN	Oxidation (M)		FALSE
EQLQDM(+15.99)GLVDLFSPEK	65.54	1863.89	16	2.9	932.956	2	25.0552	4700000	26500000	5199	20210614_HS_50ng_F4-3.raw	10	P01008|ANT3_HUMAN	Oxidation (M)		FALSE
EQLSLLDR	41.09	972.524	8	-0.3	487.269	2	16.3434	23500000	84700000	3631	20210614_HS_50ng_F2-2.raw	7	G3V595|G3V595_HUMAN;P01011|AACT_HUMAN			FALSE
EQQALQTVC(+57.02)LK	47.55	1316.68	11	-1.8	659.344	2	16.0262	53300	412000	3038	20210614_HS_50ng_F3-3.raw	1	P05452|TETN_HUMAN;E9PHK0|E9PHK0_HUMAN	Carbamidomethylation	C9:Carbamidomethylation:1000.00	FALSE
EQVQSC(+57.02)GPPPELLN(+0.98)GNVK	24.02	1965.95	18	-2.1	983.979	2	18.785	40800	424000	3326	20210614_HS_50ng_F4-2.raw	1	P08603|CFAH_HUMAN	Carbamidomethylation; Deamidation (NQ)	C6:Carbamidomethylation:1000.00;N14:Deamidation (NQ):14.04	FALSE
ESQLPTVM(+15.99)DFR	42.87	1337.63	11	-1.7	669.82	2	18.6521	2380000	16900000	3856	20210614_HS_50ng_F3-1.raw	3	A8MUN2|A8MUN2_HUMAN;P04114|APOB_HUMAN	Oxidation (M)		FALSE
ETAASLLQAGYK	61.66	1250.65	12	0.7	626.333	2	18.5101	1530000	17200000	4155	20210614_HS_50ng_F2-2.raw	5	P00734|THRB_HUMAN			FALSE
ETC(+57.02)FAEEGK	44.04	1069.44	9	3.4	535.728	2	8.9445	4780000	8220000	1692	20210614_HS_50ng_F2-2.raw	15	A0A087WWT3|A0A087WWT3_HUMAN;P02768|ALBU_HUMAN;C9JKR2|C9JKR2_HUMAN;D6RHD5|D6RHD5_HUMAN;B7WNR0|B7WNR0_HUMAN;H0YA55|H0YA55_HUMAN	Carbamidomethylation	C3:Carbamidomethylation:1000.00	FALSE
ETLFSVM(+15.99)PGLK	47.52	1236.64	11	1.1	619.329	2	20.7068	3700000	33600000	4573	20210614_HS_50ng_F3-1.raw	5	Q14624|ITIH4_HUMAN;B7ZKJ8|B7ZKJ8_HUMAN;H7C0L5|H7C0L5_HUMAN	Oxidation (M)		FALSE
ETLLQDFR	48.94	1020.52	8	-0.8	511.269	2	18.9084	492000	8310000	4711	20210614_HS_50ng_F2-1.raw	2	P02760|AMBP_HUMAN;S4R471|S4R471_HUMAN;S4R3Y4|S4R3Y4_HUMAN			FALSE
ETYGE(+21.98)M(+15.99)ADC(+57.02)C(+57.02)AK	52.5	1471.5	12	0.3	736.759	2	4.9065	6760000	15200000	802	20210614_HS_50ng_F3-3.raw	19	A0A0C4DGB6|A0A0C4DGB6_HUMAN;A0A087WWT3|A0A087WWT3_HUMAN;P02768|ALBU_HUMAN;H7C013|H7C013_HUMAN	Sodium adduct; Oxidation (M); Carbamidomethylation; Carbamidomethylation	E5:Sodium adduct:9.42;M6:Oxidation (M):1000.00;C9:Carbamidomethylation:1000.00;C10:Carbamidomethylation:1000.00	FALSE
ETYGEM(+15.99)AD(+21.98)C(+57.02)C(+57.02)AK	56.4	1471.5	12	-5.1	736.755	2	6.3111	4080000	6910000	1136	20210614_HS_50ng_F3-2.raw	8	A0A0C4DGB6|A0A0C4DGB6_HUMAN;A0A087WWT3|A0A087WWT3_HUMAN;P02768|ALBU_HUMAN;H7C013|H7C013_HUMAN	Oxidation (M); Sodium adduct; Carbamidomethylation; Carbamidomethylation	M6:Oxidation (M):1000.00;D8:Sodium adduct:0.00;C9:Carbamidomethylation:1000.00;C10:Carbamidomethylation:1000.00	FALSE
ETYGEM(+15.99)ADC(+57.02)C(+57.02)AK	73.87	1449.52	12	-7.5	725.762	2	11.151	50900000	125000000	1909	20210614_HS_50ng_F3-3.raw	112	A0A0C4DGB6|A0A0C4DGB6_HUMAN;A0A087WWT3|A0A087WWT3_HUMAN;P02768|ALBU_HUMAN;H7C013|H7C013_HUMAN	Oxidation (M); Carbamidomethylation; Carbamidomethylation	C9:Carbamidomethylation:1000.00;C10:Carbamidomethylation:1000.00	FALSE
EVAFDLEIPK	50.63	1159.61	10	1.5	580.814	2	22.7788	5600000	27000000	5290	20210614_HS_50ng_F3-1.raw	6	P19827|ITIH1_HUMAN;F8WAS2|F8WAS2_HUMAN			FALSE
EVGPTN(+0.98)ADPVC(+57.02)LAK	61.15	1470.7	14	-7.6	736.353	2	16.8859			3282	20210614_HS_50ng_F3-3.raw	1	E9PFZ2|E9PFZ2_HUMAN;H7C5R1|H7C5R1_HUMAN;P00450|CERU_HUMAN	Deamidation (NQ); Carbamidomethylation	C11:Carbamidomethylation:1000.00	FALSE
EVGPTNADPVC(+57.02)LAK	60.43	1469.72	14	-2.7	735.865	2	16.2318	2860000	17900000	3269	20210614_HS_50ng_F3-1.raw	6	E9PFZ2|E9PFZ2_HUMAN;H7C5R1|H7C5R1_HUMAN;P00450|CERU_HUMAN	Carbamidomethylation	C11:Carbamidomethylation:1000.00	FALSE
EVGTPHGIILDSVDAAFIC(+57.02)PGSSR	67.44	2497.23	24	0.1	833.416	3	26.3462	6590000	44000000	6372	20210614_HS_50ng_F2-2.raw	8	P02790|HEMO_HUMAN	Carbamidomethylation	C19:Carbamidomethylation:1000.00	FALSE
EVGTVLSQVYSK	54.34	1308.69	12	-3	655.352	2	18.4404	1460000	10000000	3711	20210614_HS_50ng_F3-3.raw	3	P04114|APOB_HUMAN			FALSE
EVIITGIQTQGAK	35.46	1356.76	13	-3.9	679.385	2	17.6208	6240	172000	3480	20210614_HS_50ng_F3-3.raw	1				FALSE
EVPLNTIIFM(+15.99)GR	44.67	1404.74	12	-5	703.375	2	23.3824	1320000	23700000	5512	20210614_HS_50ng_F3-1.raw	7	P01008|ANT3_HUMAN;Q8TCE1|Q8TCE1_HUMAN	Oxidation (M)		FALSE
EVQ(+0.98)GFESATFLGYFK	46.63	1722.81	15	6.4	862.42	2	26.4609	153000	588000	6392	20210614_HS_50ng_F3-1.raw	1	A0A0A0MS51|A0A0A0MS51_HUMAN;P06396|GELS_HUMAN;A0A0A0MT01|A0A0A0MT01_HUMAN	Deamidation (NQ)		FALSE
EVQGFESATFLGYFK	55.88	1721.83	15	2.3	861.924	2	26.4477	105000	568000	6392	20210614_HS_50ng_F3-1.raw	1	A0A0A0MS51|A0A0A0MS51_HUMAN;P06396|GELS_HUMAN;A0A0A0MT01|A0A0A0MT01_HUMAN			FALSE
EVQLVE(+21.98)SGGGLVQPGGSLR	61.13	1902.98	19	1.2	635.334	3	21.1029	937000	8990000	4151	20210614_HS_50ng_F4-3.raw	3		Sodium adduct	E6:Sodium adduct:46.80	FALSE
EVQLVESGGGLVQ(+0.98)PGGSLR	31.92	1881.98	19	8.8	628.339	3	21.3558	154000	1250000	4228	20210614_HS_50ng_F4-3.raw	3		Deamidation (NQ)	Q13:Deamidation (NQ):22.96	FALSE
EVQLVESGGGLVQPGGSLR	71.1	1881	19	-0.1	941.505	2	20.9233	20000000	136000000	4559	20210614_HS_50ng_F4-1.raw	20				FALSE
EVQPVELPNC(+57.02)NLVK	47.06	1637.84	14	1.3	819.931	2	20.5311	1080000	11000000	4373	20210614_HS_50ng_F3-3.raw	3	P27169|PON1_HUMAN	Carbamidomethylation	C10:Carbamidomethylation:1000.00	FALSE
EVVADSVWVDVK	54.3	1344.69	12	-4.7	673.35	2	20.6805	4440000	41400000	4562	20210614_HS_50ng_F3-1.raw	12	P01024|CO3_HUMAN			FALSE
EVVSLTE(+21.98)AC(+57.02)C(+57.02)AEGADPDC(+57.02)YDTR	47.19	2538.99	22	-0.2	847.338	3	18.8876	40600	644000	3990	20210614_HS_50ng_F4-1.raw	1	D6RBJ7|D6RBJ7_HUMAN;P02774|VTDB_HUMAN;D6RF20|D6RF20_HUMAN;D6RF35|D6RF35_HUMAN	Sodium adduct; Carbamidomethylation; Carbamidomethylation; Carbamidomethylation	E7:Sodium adduct:0.00;C9:Carbamidomethylation:1000.00;C10:Carbamidomethylation:1000.00;C18:Carbamidomethylation:1000.00	FALSE
EVVSLTEAC(+57.02)C(+57.02)AEGADPDC(+57.02)YDTR	55.39	2517.01	22	2.2	840.012	3	18.8876	260000	3140000	3975	20210614_HS_50ng_F4-1.raw	3	D6RBJ7|D6RBJ7_HUMAN;P02774|VTDB_HUMAN;D6RF20|D6RF20_HUMAN;D6RF35|D6RF35_HUMAN	Carbamidomethylation; Carbamidomethylation; Carbamidomethylation	C9:Carbamidomethylation:1000.00;C10:Carbamidomethylation:1000.00;C18:Carbamidomethylation:1000.00	FALSE
EVYGFNPEGK	49.34	1138.53	10	0.2	570.272	2	15.1973	2860000	9030000	3201	20210614_HS_50ng_F2-3.raw	3	A8MUN2|A8MUN2_HUMAN;A0A669KB70|A0A669KB70_HUMAN;P04114|APOB_HUMAN			FALSE
EWFSETFQK	42.89	1200.55	9	5.7	601.283	2	20.7257	212000	1960000	4872	20210614_HS_50ng_F2-2.raw	2				FALSE
EWFWDLATGTM(+15.99)K	44.14	1499.68	12	0.8	750.846	2	25.8152	1300000	6600000	6211	20210614_HS_50ng_F3-1.raw	3	P02790|HEMO_HUMAN;Q9BS19|Q9BS19_HUMAN	Oxidation (M)		FALSE
EYC(+57.02)GVPGDGDEELLR	54.26	1707.74	15	-1.5	854.876	2	18.7251	215000	2190000	3938	20210614_HS_50ng_F3-1.raw	2	P02760|AMBP_HUMAN	Carbamidomethylation	C3:Carbamidomethylation:1000.00	FALSE
EYESYSDFER	40.77	1323.53	10	-0.4	662.77	2	14.7109	83600	557000	2749	20210614_HS_50ng_F3-3.raw	2	F5GY80|F5GY80_HUMAN;P07358|CO8B_HUMAN;F5H7G1|F5H7G1_HUMAN			FALSE
EYSGTIASEANTYLN(+0.98)SK	53.67	1847.84	17	2.3	924.931	2	19.6458	269000	2640000	3748	20210614_HS_50ng_F4-3.raw	3	P04114|APOB_HUMAN	Deamidation (NQ)	N15:Deamidation (NQ):49.79	FALSE
EYSGTIASEANTYLNSK	71.51	1846.86	17	-0.3	924.436	2	19.4954	264000	6720000	4030	20210614_HS_50ng_F3-3.raw	4	P04114|APOB_HUMAN			FALSE
EYTDASFTNR	54.93	1202.52	10	-4.4	602.265	2	7.7165	1460000	4810000	1482	20210614_HS_50ng_F2-2.raw	4	E9PFZ2|E9PFZ2_HUMAN;H7C5R1|H7C5R1_HUMAN;P00450|CERU_HUMAN			FALSE
EYVLPSFEVIVEPTEK	45.96	1877.97	16	2.8	939.993	2	26.5923	123000	1110000	6434	20210614_HS_50ng_F3-1.raw	1	P01024|CO3_HUMAN			FALSE
FAC(+57.02)YYPR	56.61	975.427	7	-2.8	488.719	2	13.8184	438000	3070000	2822	20210614_HS_50ng_F2-2.raw	3	A0A140TA32|A0A140TA32_HUMAN;A0A140TA29|A0A140TA29_HUMAN;P0C0L4|CO4A_HUMAN;P0C0L5|CO4B_HUMAN;A0A0G2JPR0|A0A0G2JPR0_HUMAN;A0A140TA49|A0A140TA49_HUMAN;F5GXS0|F5GXS0_HUMAN;A0A140TA44|A0A140TA44_HUMAN;A0A3B3ISA6|A0A3B3ISA6_HUMAN;A0A0G2JL54|A0A0G2JL54_HUMAN	Carbamidomethylation	C3:Carbamidomethylation:1000.00	FALSE
FAFNLYR	41.6	929.476	7	0.5	465.745	2	21.9174	614000	5640000	5293	20210614_HS_50ng_F2-2.raw	3	P05546|HEP2_HUMAN			FALSE
FAHYVVTSQVVNTANEAR	72.42	2005	18	1.5	669.342	3	19.0774	3720000	34600000	4320	20210614_HS_50ng_F2-2.raw	6	P19827|ITIH1_HUMAN;F8WAS2|F8WAS2_HUMAN			FALSE
FATTFYQHLADSK	73.15	1527.74	13	1.1	764.876	2	19.948	1860000	18100000	4640	20210614_HS_50ng_F2-2.raw	5	P01008|ANT3_HUMAN;Q8TCE1|Q8TCE1_HUMAN			FALSE
FC(+57.02)GQLGSPLGNPPGK	68.83	1527.75	15	-0.2	764.882	2	18.6367	48400	571000	3784	20210614_HS_50ng_F3-3.raw	1		Carbamidomethylation	C2:Carbamidomethylation:1000.00	FALSE
FDEFFSE(+21.98)GC(+57.02)APGSK	59.27	1598.63	14	-0.4	533.885	3	19.2025	454000	4520000	4068	20210614_HS_50ng_F3-1.raw	3	H7C5E8|H7C5E8_HUMAN;P02787|TRFE_HUMAN	Sodium adduct; Carbamidomethylation	E7:Sodium adduct:22.71;C9:Carbamidomethylation:1000.00	FALSE
FDEFFSEGC(+57.02)APGSK	81.77	1576.65	14	3.3	789.335	2	19.5705	19400000	131000000	3721	20210614_HS_50ng_F4-3.raw	35	H7C5E8|H7C5E8_HUMAN;P02787|TRFE_HUMAN	Carbamidomethylation	C9:Carbamidomethylation:1000.00	FALSE
FDHVITNM(+15.99)N(+0.98)NNYEPR	37.75	1879.82	15	2.1	627.614	3	15.8157	116000	823000	3413	20210614_HS_50ng_F2-3.raw	1	A0A0A0MSV6|A0A0A0MSV6_HUMAN;P02746|C1QB_HUMAN;D6R934|D6R934_HUMAN	Oxidation (M); Deamidation (NQ)	M8:Oxidation (M):1000.00;N9:Deamidation (NQ):8.22	FALSE
FDHVITNM(+15.99)NNNYEPR	61.75	1878.83	15	0.2	627.285	3	15.5355	502000	4160000	3310	20210614_HS_50ng_F2-3.raw	1	A0A0A0MSV6|A0A0A0MSV6_HUMAN;P02746|C1QB_HUMAN;D6R934|D6R934_HUMAN	Oxidation (M)		FALSE
FDPSLTQR	51.1	962.482	8	-1.2	482.248	2	11.7926	237000	1450000	2349	20210614_HS_50ng_F2-3.raw	3	A0A0J9YY65|A0A0J9YY65_HUMAN;A0A0G2JPA8|A0A0G2JPA8_HUMAN;C9JMH6|C9JMH6_HUMAN;C9JPV4|C9JPV4_HUMAN;A0A0J9YWQ3|A0A0J9YWQ3_HUMAN;P08697|A2AP_HUMAN			FALSE
FDPVRGEVPPR	36.35	1267.67	11	-5	423.561	3	14.3809	1730000	3690000	2977	20210614_HS_50ng_F1-1.raw	9	P02790|HEMO_HUMAN;Q9BS19|Q9BS19_HUMAN			FALSE
FEDGVLDPDYPR	67.04	1421.65	12	0.4	711.831	2	19.3512	4540000	33200000	3670	20210614_HS_50ng_F4-3.raw	13	P04004|VTNC_HUMAN			FALSE
FEVQVTVPK	56.98	1045.58	9	2.2	523.799	2	18.9726	6370000	53700000	4720	20210614_HS_50ng_F2-1.raw	5	P01023|A2MG_HUMAN			FALSE
FFESFGDLSTPDAVM(+15.99)GNPK	60.05	2073.94	19	0.3	1037.98	2	23.4349	251000	2000000	4811	20210614_HS_50ng_F4-3.raw	2	F8W6P5|F8W6P5_HUMAN;P68871|HBB_HUMAN;A0A2R8Y7R2|A0A2R8Y7R2_HUMAN	Oxidation (M)		FALSE
FGLLDEDGK	55.55	992.481	9	0.7	497.248	2	17.0031	575000	2710000	3781	20210614_HS_50ng_F2-3.raw	3	A0A140TA32|A0A140TA32_HUMAN;A0A140TA29|A0A140TA29_HUMAN;P0C0L4|CO4A_HUMAN;P0C0L5|CO4B_HUMAN;A0A0G2JPR0|A0A0G2JPR0_HUMAN;A0A140TA49|A0A140TA49_HUMAN;F5GXS0|F5GXS0_HUMAN;A0A140TA44|A0A140TA44_HUMAN;A0A0G2JL54|A0A0G2JL54_HUMAN			FALSE
FKDLGEE(+21.98)NFK	42.14	1247.58	10	-2.6	624.795	2	13.5919	2960000	9640000	2693	20210614_HS_50ng_F1-1.raw	3	A0A0C4DGB6|A0A0C4DGB6_HUMAN;A0A087WWT3|A0A087WWT3_HUMAN;P02768|ALBU_HUMAN;H7C013|H7C013_HUMAN;C9JKR2|C9JKR2_HUMAN;B7WNR0|B7WNR0_HUMAN	Sodium adduct	E7:Sodium adduct:11.06	FALSE
FKDLGEENFK	56.35	1225.6	10	-0.5	613.806	2	14.843	118000000	679000000	3185	20210614_HS_50ng_F2-2.raw	66	A0A0C4DGB6|A0A0C4DGB6_HUMAN;A0A087WWT3|A0A087WWT3_HUMAN;P02768|ALBU_HUMAN;H7C013|H7C013_HUMAN;C9JKR2|C9JKR2_HUMAN;B7WNR0|B7WNR0_HUMAN			FALSE
FLC(+57.02)TGGVSPYADPNTC(+57.02)R	40.48	1913.84	17	0.9	957.928	2	18.743	394000	4000000	3798	20210614_HS_50ng_F3-3.raw	3	H7C5H1|H7C5H1_HUMAN;E7ETN3|E7ETN3_HUMAN;P00751|CFAB_HUMAN;B4E1Z4|B4E1Z4_HUMAN	Carbamidomethylation; Carbamidomethylation	C3:Carbamidomethylation:1000.00;C16:Carbamidomethylation:1000.00	FALSE
FLEQQNQVLQTK	61.57	1474.78	12	0.3	738.396	2	15.163	4510000	34500000	3131	20210614_HS_50ng_F3-1.raw	11	#CONTAM#cont|000132|;P35908|K22E_HUMAN;#CONTAM#cont|000135|;#CONTAM#cont|000134|;P04264|K2C1_HUMAN			FALSE
FLVNLVK	35.6	831.522	7	-0.3	416.768	2	20.5828	333000	3180000	5279	20210614_HS_50ng_F2-1.raw	3	P43652|AFAM_HUMAN			FALSE
FM(+15.99)QAVTGWK	53.98	1082.52	9	0.6	542.269	2	15.9181	1150000	3820000	3416	20210614_HS_50ng_F2-3.raw	2	P01019|ANGT_HUMAN	Oxidation (M)		FALSE
FN(+0.98)WYVDGVEVHNAK	48.28	1677.78	14	4.7	560.269	3	21.5084	495000	5110000	5088	20210614_HS_50ng_F2-2.raw	5	P01857|IGHG1_HUMAN;A0A0A0MS08|A0A0A0MS08_HUMAN	Deamidation (NQ)	N2:Deamidation (NQ):74.64	FALSE
FNAVLTNPQGDYDTSTGK	73.94	1926.9	18	-0.4	964.455	2	18.2914	1340000	12400000	3381	20210614_HS_50ng_F4-3.raw	6	P02747|C1QC_HUMAN			FALSE
FNKPFVFLM(+15.99)IEQNTK	44.55	1870.97	15	0.9	624.663	3	24.5798	713000	3900000	6695	20210614_HS_50ng_F2-1.raw	1		Oxidation (M)		FALSE
FNWYVDGVEVHN(+0.98)AK	62.95	1677.78	14	6.3	560.27	3	22.3119	1750000	15900000	5361	20210614_HS_50ng_F2-2.raw	3	P01857|IGHG1_HUMAN;A0A0A0MS08|A0A0A0MS08_HUMAN	Deamidation (NQ)	N12:Deamidation (NQ):23.48	FALSE
FNWYVDGVEVHNAK	69.72	1676.79	14	1.8	839.406	2	22.0026	15600000	101000000	5242	20210614_HS_50ng_F2-2.raw	53	P01857|IGHG1_HUMAN;A0A0A0MS08|A0A0A0MS08_HUMAN			FALSE
FPEVDVLTK	58.75	1046.56	9	1.9	524.291	2	20.1693	5340000	48000000	4885	20210614_HS_50ng_F2-3.raw	3	P04114|APOB_HUMAN			FALSE
FPKAEFAEVSK	61.33	1251.65	11	-2.9	418.222	3	17.4492	341000	2600000	3272	20210614_HS_50ng_F1-2.raw	3	A0A0C4DGB6|A0A0C4DGB6_HUMAN;P02768|ALBU_HUMAN;C9JKR2|C9JKR2_HUMAN;D6RHD5|D6RHD5_HUMAN;B7WNR0|B7WNR0_HUMAN;H0YA55|H0YA55_HUMAN			FALSE
FPSGTFEQVSQLVK	65.85	1565.81	14	2.7	783.914	2	24.3067	2210000	17600000	5156	20210614_HS_50ng_F3-2.raw	3	D6RBJ7|D6RBJ7_HUMAN;P02774|VTDB_HUMAN;D6RF20|D6RF20_HUMAN;D6RF35|D6RF35_HUMAN			FALSE
FQFPGKPGIYTR	61.34	1409.75	12	-0.3	470.922	3	20.3119	333000	2900000	4172	20210614_HS_50ng_F1-3b.raw	3	P04114|APOB_HUMAN			FALSE
FQN(+0.98)ALLVR	50.8	960.539	8	1.5	481.278	2	18.5521	9330000	109000000	4184	20210614_HS_50ng_F2-2.raw	8	A0A0C4DGB6|A0A0C4DGB6_HUMAN;A0A087WWT3|A0A087WWT3_HUMAN;P02768|ALBU_HUMAN;C9JKR2|C9JKR2_HUMAN;D6RHD5|D6RHD5_HUMAN;B7WNR0|B7WNR0_HUMAN;H0YA55|H0YA55_HUMAN	Deamidation (NQ)	N3:Deamidation (NQ):40.00	FALSE
FQNALLVR	65.89	959.555	8	-3.1	480.783	2	17.1765	686000000	2650000000	3837	20210614_HS_50ng_F4-1.raw	188	A0A0C4DGB6|A0A0C4DGB6_HUMAN;A0A087WWT3|A0A087WWT3_HUMAN;P02768|ALBU_HUMAN;C9JKR2|C9JKR2_HUMAN;D6RHD5|D6RHD5_HUMAN;B7WNR0|B7WNR0_HUMAN;H0YA55|H0YA55_HUMAN			FALSE
FQNSAILTIQPK	61.14	1358.76	12	-3.1	680.383	2	20.4108	95100	1660000	4125	20210614_HS_50ng_F3-2.raw	3	P01031|CO5_HUMAN			FALSE
FQPTLLTLPR	60.21	1184.69	10	1.3	593.354	2	24.2266	8880000	64300000	5138	20210614_HS_50ng_F3-2.raw	9	H9KV48|H9KV48_HUMAN;P05155|IC1_HUMAN;E9PGN7|E9PGN7_HUMAN			FALSE
FQSVFTVTR	53.63	1083.57	9	2.1	542.794	2	18.7552	1290000	10700000	4624	20210614_HS_50ng_F2-1.raw	3	P02747|C1QC_HUMAN			FALSE
FSAIC(+57.02)Q(+0.98)GDGTWSPR	61.3	1581.69	14	9.4	791.859	2	18.8004	9020	207000	3825	20210614_HS_50ng_F3-3.raw	2	P04003|C4BPA_HUMAN	Carbamidomethylation; Deamidation (NQ)	C5:Carbamidomethylation:1000.00	FALSE
FSAIC(+57.02)QGDGTWSPR	63.29	1580.7	14	-0.6	791.359	2	19.2869	539000	5230000	3803	20210614_HS_50ng_F3-2.raw	3	P04003|C4BPA_HUMAN	Carbamidomethylation	C5:Carbamidomethylation:1000.00	FALSE
FSDASYQSINIPVTQNM(+15.99)VPSSR	39.64	2456.16	22	1.5	819.73	3	21.5805	43400	497000	4296	20210614_HS_50ng_F4-3.raw	1	P01031|CO5_HUMAN	Oxidation (M)		FALSE
FSGQLNSHGC(+57.02)FYQQVK	65.28	1898.87	16	2.7	633.967	3	17.5899	4990000	39100000	4231	20210614_HS_50ng_F2-1.raw	5	P01023|A2MG_HUMAN	Carbamidomethylation	C10:Carbamidomethylation:1000.00	FALSE
FSGSGAGTDFTLK	53.77	1286.61	13	-0.4	644.314	2	17.7237	170000	1420000	3916	20210614_HS_50ng_F2-2.raw	2				FALSE
FSGSGSGTDFTLK	62.98	1302.61	13	1.2	652.313	2	16.9231	16300000	96000000	3652	20210614_HS_50ng_F2-2.raw	11	A0A5H1ZRS2|A0A5H1ZRS2_HUMAN			FALSE
FSGSGSGTDFTLTISR	73.47	1631.78	16	3.3	816.899	2	21.2379	3430000	19000000	4325	20210614_HS_50ng_F3-2.raw	7	P01619|KV320_HUMAN			FALSE
FSGSN(+0.98)SGNTATLTISR	73.76	1612.77	16	0.8	807.393	2	16.3738	446000	2130000	2825	20210614_HS_50ng_F4-2.raw	3		Deamidation (NQ)	N5:Deamidation (NQ):47.09	FALSE
FSGSNSGNTATLTISR	73.51	1611.79	16	-0.8	806.899	2	16.1337	3880000	18700000	2999	20210614_HS_50ng_F3-2.raw	6				FALSE
FSGTWYAM(+15.99)AK	46.53	1176.53	10	3.1	589.273	2	17.1507	1080000	8120000	3818	20210614_HS_50ng_F2-3.raw	3	Q5VY30|Q5VY30_HUMAN;P02753|RET4_HUMAN	Oxidation (M)		FALSE
FSPATHPSEGLEENYC(+57.02)R	58.14	1992.86	17	0.8	665.296	3	16.4473	3080000	23300000	3583	20210614_HS_50ng_F2-3.raw	4	P00747|PLMN_HUMAN	Carbamidomethylation	C16:Carbamidomethylation:1000.00	FALSE
FTC(+57.02)TVTHTDLPSPLK	72.56	1715.86	15	0.2	858.935	2	19.4652	6030000	51800000	4891	20210614_HS_50ng_F2-1.raw	6	P01871|IGHM_HUMAN	Carbamidomethylation	C3:Carbamidomethylation:1000.00	FALSE
FVTWIEGVM(+15.99)R	36.64	1252.63	10	2.4	627.322	2	22.1566	1190000	9480000	5598	20210614_HS_50ng_F2-3.raw	2	P00747|PLMN_HUMAN	Oxidation (M)		FALSE
FYN(+0.98)QVSTPLLR	47.79	1337.7	11	5.9	669.86	2	20.6518	28100	530000	4430	20210614_HS_50ng_F3-3.raw	1	#CONTAM#cont|000108|;Q5T985|Q5T985_HUMAN;P19823|ITIH2_HUMAN	Deamidation (NQ)	N3:Deamidation (NQ):0.00	FALSE
FYNQVSTPLLR	64.56	1336.71	11	2.6	669.366	2	21.0019	2590000	20100000	4269	20210614_HS_50ng_F3-2.raw	7	#CONTAM#cont|000108|;Q5T985|Q5T985_HUMAN;P19823|ITIH2_HUMAN			FALSE
FYYIYNEK	55.63	1138.53	8	2.2	570.275	2	18.4191	10700000	59000000	4124	20210614_HS_50ng_F2-2.raw	8	P01024|CO3_HUMAN			FALSE
GAYPLSIEPIGVR	58.68	1370.76	13	2.1	686.387	2	22.7265	7730000	61300000	5268	20210614_HS_50ng_F3-1.raw	9	E9PFZ2|E9PFZ2_HUMAN;H7C5R1|H7C5R1_HUMAN;P00450|CERU_HUMAN			FALSE
GC(+57.02)PDVQASLPDAK	64.52	1356.63	13	-0.2	679.324	2	15.4909	472000	2220000	2890	20210614_HS_50ng_F3-3.raw	3	Q96PD5|PGRP2_HUMAN	Carbamidomethylation	C2:Carbamidomethylation:1000.00	FALSE
GDATVFFILPNQGK	61.41	1505.79	14	3.5	753.904	2	24.8857	331000	3100000	5740	20210614_HS_50ng_F3-3.raw	3	P29622|KAIN_HUMAN			FALSE
GDAVC(+57.02)TESGWRPLPSC(+57.02)EEK	63.71	2176.95	19	1.2	726.659	3	18.4575	1330000	12400000	4142	20210614_HS_50ng_F2-2.raw	3	A0A0D9SG88|A0A0D9SG88_HUMAN;P08603|CFAH_HUMAN;Q5TFM2|Q5TFM2_HUMAN	Carbamidomethylation; Carbamidomethylation	C5:Carbamidomethylation:1000.00;C16:Carbamidomethylation:1000.00	FALSE
GDDITM(+15.99)VLILPKPEK	57.33	1683.91	15	4.3	842.967	2	22.836	1370000	12400000	5814	20210614_HS_50ng_F2-3.raw	4	P01008|ANT3_HUMAN	Oxidation (M)		FALSE
GDM(+15.99)FLVANLGTK	35.83	1280.64	12	1.1	641.33	2	20.2536	24700	314000	4306	20210614_HS_50ng_F3-3.raw	1	P43251|BTD_HUMAN	Oxidation (M)		FALSE
GDTFSC(+57.02)M(+15.99)VGHEALPLAFTQK	57.45	2224.03	20	1.8	742.352	3	22.9874	2440000	22800000	6150	20210614_HS_50ng_F2-1.raw	4	P01876|IGHA1_HUMAN;A0A286YEY1|A0A286YEY1_HUMAN	Carbamidomethylation; Oxidation (M)	C6:Carbamidomethylation:1000.00	FALSE
GEC(+57.02)Q(+0.98)AEGVLFFQGDR	49.86	1712.75	15	5	857.385	2	22.5441	911000	6440000	4764	20210614_HS_50ng_F3-2.raw	3	P02790|HEMO_HUMAN;Q9BS19|Q9BS19_HUMAN	Carbamidomethylation; Deamidation (NQ)	C3:Carbamidomethylation:1000.00;Q4:Deamidation (NQ):81.34	FALSE
GEC(+57.02)QAE(+21.98)GVLFFQGDR	43.81	1733.74	15	5.1	578.925	3	21.286			4783	20210614_HS_50ng_F3-1.raw	1	P02790|HEMO_HUMAN;Q9BS19|Q9BS19_HUMAN	Carbamidomethylation; Sodium adduct	C3:Carbamidomethylation:1000.00;E6:Sodium adduct:3.13	FALSE
GEC(+57.02)QAEGVLFFQGDR	66.3	1711.76	15	0	856.888	2	21.4763	2040000	18800000	4693	20210614_HS_50ng_F3-3.raw	15	P02790|HEMO_HUMAN;Q9BS19|Q9BS19_HUMAN	Carbamidomethylation	C3:Carbamidomethylation:1000.00	FALSE
GEC(+57.02)VPGEQEPEPILIPR	54.58	1918.95	17	0.9	960.481	2	21.4564	243000	2950000	4840	20210614_HS_50ng_F3-1.raw	4	P02760|AMBP_HUMAN;S4R471|S4R471_HUMAN	Carbamidomethylation	C3:Carbamidomethylation:1000.00	FALSE
GEFYIGSK	41.88	899.439	8	-2.1	450.726	2	13.0383	373000	1720000	2627	20210614_HS_50ng_F2-3.raw	3	E9PFZ2|E9PFZ2_HUMAN;H7C5R1|H7C5R1_HUMAN;P00450|CERU_HUMAN			FALSE
GEVLDNSFTGGIC(+57.02)K	52.79	1495.7	14	-2	748.855	2	18.7797	23800	349000	3813	20210614_HS_50ng_F3-3.raw	1	P13671|CO6_HUMAN	Carbamidomethylation	C13:Carbamidomethylation:1000.00	FALSE
GEVQAM(+15.99)LGQSTEELR	70.29	1662.79	15	-0.3	832.401	2	16.7961	1140000	9610000	3238	20210614_HS_50ng_F3-3.raw	6	E7ERP7|E7ERP7_HUMAN;E9PEV4|E9PEV4_HUMAN;P02649|APOE_HUMAN;H0Y7L5|H0Y7L5_HUMAN	Oxidation (M)		FALSE
GFEPTLEALFGK	61.54	1307.68	12	3.4	654.847	2	27.3341	1830000	13000000	6574	20210614_HS_50ng_F2-2.raw	6	A8MUN2|A8MUN2_HUMAN;P04114|APOB_HUMAN			FALSE
GFSLDEATNLN(+0.98)GGLLR	55.82	1676.84	16	4.7	839.43	2	24.1425	151000	1630000	5564	20210614_HS_50ng_F3-3.raw	2	P19827|ITIH1_HUMAN	Deamidation (NQ)	N11:Deamidation (NQ):26.31	FALSE
GFYPSDIAVEWESNGQPENNYK	28.05	2543.12	22	0.3	848.716	3	24.1149	244000	673000	5662	20210614_HS_50ng_F4-1.raw	1	P01857|IGHG1_HUMAN;A0A0A0MS08|A0A0A0MS08_HUMAN;A0A0A0MS07|A0A0A0MS07_HUMAN			FALSE
GFYPSDISVEWESNGQ(+0.98)PENNYK	36.02	2560.1	22	2.2	854.377	3	21.3431	96900	703000	4221	20210614_HS_50ng_F4-3.raw	1	P01859|IGHG2_HUMAN;A0A286YEY4|A0A286YEY4_HUMAN	Deamidation (NQ)	Q16:Deamidation (NQ):0.00	FALSE
GGEGTGYFVDFSVR	33.75	1489.68	14	1.9	745.851	2	22.7539	89700	736000	5253	20210614_HS_50ng_F3-1.raw	1	P04196|HRG_HUMAN			FALSE
GGETAQSADPQWEQLNNK	48.49	1971.89	18	-0.3	986.953	2	16.8659	167000	1760000	3197	20210614_HS_50ng_F3-2.raw	2	P05546|HEP2_HUMAN			FALSE
GGYTLVSGYPK	55.73	1140.58	11	-4.7	571.295	2	17.3292	16700000	106000000	3867	20210614_HS_50ng_F2-3.raw	10	P02790|HEMO_HUMAN			FALSE
GHFSISIPVK	71.16	1083.61	10	3.4	542.813	2	20.5105	2800000	20700000	4225	20210614_HS_50ng_F1-3b.raw	6	H0YFH1|H0YFH1_HUMAN;P01023|A2MG_HUMAN			FALSE
GHLFLQTDQPIYNPGQR	70.89	1983	17	-2.1	662.005	3	21.1041	2600000	31500000	5216	20210614_HS_50ng_F2-3.raw	7	A0A140TA32|A0A140TA32_HUMAN;A0A140TA29|A0A140TA29_HUMAN;P0C0L4|CO4A_HUMAN;P0C0L5|CO4B_HUMAN;A0A0G2JPR0|A0A0G2JPR0_HUMAN;A0A140TA49|A0A140TA49_HUMAN;F5GXS0|F5GXS0_HUMAN;A0A140TA44|A0A140TA44_HUMAN;A0A0G2JL54|A0A0G2JL54_HUMAN			FALSE
GIISALLVPPETEEAK	71.81	1665.92	16	2.8	556.315	3	24.987	3320000	26000000	5758	20210614_HS_50ng_F3-3.raw	7	A8MUN2|A8MUN2_HUMAN;P04114|APOB_HUMAN			FALSE
GISTSAASPAVGTVGM(+15.99)D(+21.98)M(+15.99)DEDDDFSK	54.64	2656.08	26	1.5	886.368	3	18.2931	443000	4460000	3391	20210614_HS_50ng_F4-3.raw	2	P04114|APOB_HUMAN	Oxidation (M); Sodium adduct; Oxidation (M)	M16:Oxidation (M):1000.00;D17:Sodium adduct:32.28;M18:Oxidation (M):1000.00	FALSE
GISTSAASPAVGTVGM(+15.99)DM(+15.99)DEDDDFSK	52.75	2634.09	26	-1.6	879.038	3	18.0823	1630000	15300000	3746	20210614_HS_50ng_F4-1.raw	3	P04114|APOB_HUMAN	Oxidation (M); Oxidation (M)		FALSE
GLC(+57.02)VATPVQLR	60.9	1212.66	11	4.4	607.342	2	20.2709	1270000	13200000	4727	20210614_HS_50ng_F2-2.raw	2	A0A140TA32|A0A140TA32_HUMAN;A0A140TA29|A0A140TA29_HUMAN;P0C0L4|CO4A_HUMAN;P0C0L5|CO4B_HUMAN;A0A0G2JPR0|A0A0G2JPR0_HUMAN;A0A140TA49|A0A140TA49_HUMAN;F5GXS0|F5GXS0_HUMAN;A0A140TA44|A0A140TA44_HUMAN;A0A3B3ISA6|A0A3B3ISA6_HUMAN;A0A0G2JL54|A0A0G2JL54_HUMAN	Carbamidomethylation	C3:Carbamidomethylation:1000.00	FALSE
GLETSLAEC(+57.02)TFTK	66.2	1455.69	13	5.1	728.857	2	19.8605	161000	2260000	3952	20210614_HS_50ng_F3-2.raw	2	G3XAM2|G3XAM2_HUMAN;A0A2R8Y3M9|A0A2R8Y3M9_HUMAN;A0A087X0I2|A0A087X0I2_HUMAN;E7ETH0|E7ETH0_HUMAN;P05156|CFAI_HUMAN	Carbamidomethylation	C9:Carbamidomethylation:1000.00	FALSE
GLEVTITAR	52.52	958.545	9	-1.4	480.279	2	15.6369	5530000	18300000	3595	20210614_HS_50ng_F2-1.raw	3	P01024|CO3_HUMAN			FALSE
GLEWLGR	35.49	829.445	7	0.2	415.73	2	18.278	241000	1350000	4182	20210614_HS_50ng_F2-3.raw	4				FALSE
GLEWM(+15.99)GIIYPGDSDTR	48.68	1824.84	16	6.5	913.431	2	24.1423	161000	1680000	5554	20210614_HS_50ng_F3-3.raw	2	A0A0C4DH38|HV551_HUMAN	Oxidation (M)		FALSE
GLEWVANIK	36.97	1028.57	9	1.7	515.291	2	21.3654	400000	5400000	5323	20210614_HS_50ng_F2-3.raw	2				FALSE
GLEWVGFIR	49.01	1075.58	9	3	538.8	2	25.4364	340000	2300000	6555	20210614_HS_50ng_F2-3.raw	3				FALSE
GLPAPIEK	38.85	823.48	8	1.1	824.489	1	7.6366	516000	1050000	1661	20210614_HS_50ng_F2-1.raw	1	P01859|IGHG2_HUMAN;A0A286YEY4|A0A286YEY4_HUMAN			FALSE
GM(+15.99)ADQDGLKPTIDKPSEDSPPLEM(+15.99)LGPR	55.38	3025.44	28	-0.8	757.366	4	20.2306	3150000	24200000	5168	20210614_HS_50ng_F2-1.raw	3	P19827|ITIH1_HUMAN	Oxidation (M); Oxidation (M)		FALSE
GM(+15.99)ALFGEGK	38.54	924.438	9	-4.8	463.224	2	8.1041	78600	180000	1611	20210614_HS_50ng_F2-2.raw	2	P04114|APOB_HUMAN	Oxidation (M)		FALSE
GM(+15.99)TNINDGLLR	40.24	1218.6	11	5.8	610.312	2	16.0068	196000	4040000	3457	20210614_HS_50ng_F2-3.raw	3	E7ET33|E7ET33_HUMAN;A0A087WW43|A0A087WW43_HUMAN;Q06033|ITIH3_HUMAN	Oxidation (M)		FALSE
GM(+15.99)TRPLSTLISSSQSC(+57.02)QYTLDAK	56.32	2559.23	23	1.8	854.086	3	21.8781	498000	6470000	5221	20210614_HS_50ng_F2-2.raw	3	A8MUN2|A8MUN2_HUMAN;P04114|APOB_HUMAN	Oxidation (M); Carbamidomethylation	C16:Carbamidomethylation:1000.00	FALSE
GPDVLTATVSGK	66.03	1143.61	12	1.8	572.815	2	15.5328	1740000	5620000	2880	20210614_HS_50ng_F3-2.raw	5	Q14624|ITIH4_HUMAN;B7ZKJ8|B7ZKJ8_HUMAN;H7C0L5|H7C0L5_HUMAN			FALSE
GPEVQLVAHSPWLK	72.68	1559.85	14	2.4	780.932	2	22.4699	1810000	20100000	5695	20210614_HS_50ng_F2-3.raw	8	A0A140TA32|A0A140TA32_HUMAN;A0A140TA29|A0A140TA29_HUMAN;P0C0L4|CO4A_HUMAN;P0C0L5|CO4B_HUMAN;A0A0G2JPR0|A0A0G2JPR0_HUMAN;A0A140TA49|A0A140TA49_HUMAN;F5GXS0|F5GXS0_HUMAN;A0A140TA44|A0A140TA44_HUMAN;A0A0G2JL54|A0A0G2JL54_HUMAN			FALSE
GPLDQLEK	50.79	898.476	8	-3	450.244	2	11.3049	1180000	2950000	2303	20210614_HS_50ng_F2-2.raw	4	P05546|HEP2_HUMAN			FALSE
GPSVFPLAPC(+57.02)SR	66.58	1286.64	12	-3.7	644.327	2	20.3843	46600000	414000000	3308	20210614_HS_50ng_F5-3.raw	16	P01859|IGHG2_HUMAN;A0A4W9A917|A0A4W9A917_HUMAN;P01860|IGHG3_HUMAN;A0A286YEY4|A0A286YEY4_HUMAN;A0A286YES1|A0A286YES1_HUMAN	Carbamidomethylation	C10:Carbamidomethylation:1000.00	FALSE
GPSVFPLAPSSK	79.23	1185.64	12	4.5	593.83	2	19.5286	79900000	661000000	3706	20210614_HS_50ng_F4-3.raw	48	P01857|IGHG1_HUMAN;A0A0A0MS08|A0A0A0MS08_HUMAN;A0A0A0MS07|A0A0A0MS07_HUMAN			FALSE
GPSVFPLAPSSK(+21.98)	41.96	1207.62	12	-0.9	604.817	2	18.948			4710	20210614_HS_50ng_F2-1.raw	1	P01857|IGHG1_HUMAN;A0A0A0MS08|A0A0A0MS08_HUMAN;A0A0A0MS07|A0A0A0MS07_HUMAN	Sodium adduct		FALSE
GQELC(+57.02)ADYSENTFTEYK	72.32	2053.86	17	-1.3	1027.93	2	19.3646	108000	1530000	3993	20210614_HS_50ng_F3-3.raw	2	P02774|VTDB_HUMAN;D6RF35|D6RF35_HUMAN	Carbamidomethylation	C5:Carbamidomethylation:1000.00	FALSE
GQGTLSVVTM(+15.99)YHAK	57.26	1506.75	14	3.8	754.385	2	16.4943	3620000	13300000	3611	20210614_HS_50ng_F2-3.raw	5	P01024|CO3_HUMAN;M0QYC8|M0QYC8_HUMAN	Oxidation (M)		FALSE
GQPSVLQVVNLPIVERPVC(+57.02)K	45.46	2231.25	20	-4.9	744.752	3	26.0638	852000	9840000	6735	20210614_HS_50ng_F2-3.raw	4	P00734|THRB_HUMAN;E9PIT3|E9PIT3_HUMAN	Carbamidomethylation	C19:Carbamidomethylation:1000.00	FALSE
GQYC(+57.02)YELDEK	54.53	1303.54	10	-0.6	652.776	2	13.7584	730000	2670000	2800	20210614_HS_50ng_F2-3.raw	1	P04004|VTNC_HUMAN	Carbamidomethylation	C4:Carbamidomethylation:1000.00	FALSE
GSFEFPVGDAVSK	62.13	1338.65	13	-7.4	670.325	2	20.8055	4410000	44200000	4450	20210614_HS_50ng_F3-3.raw	7	A0A140TA32|A0A140TA32_HUMAN;A0A140TA29|A0A140TA29_HUMAN;P0C0L4|CO4A_HUMAN;P0C0L5|CO4B_HUMAN;A0A0G2JPR0|A0A0G2JPR0_HUMAN;A0A140TA49|A0A140TA49_HUMAN;F5GXS0|F5GXS0_HUMAN;A0A140TA44|A0A140TA44_HUMAN;A0A3B3ISA6|A0A3B3ISA6_HUMAN;A0A0G2JL54|A0A0G2JL54_HUMAN			FALSE
GSFPWQAK	59.14	919.455	8	0.8	460.735	2	17.6616	20800000	214000000	4267	20210614_HS_50ng_F2-1.raw	16	P00738|HPT_HUMAN;A0A0A0MRD9|A0A0A0MRD9_HUMAN;A0A087WU08|A0A087WU08_HUMAN;H0Y300|H0Y300_HUMAN;A0A0C4DGL8|A0A0C4DGL8_HUMAN;J3QR68|J3QR68_HUMAN;P00739|HPTR_HUMAN			FALSE
GSLGGGFSSGGFSGGSFSR	61.02	1706.76	19	-2.4	854.388	2	19.8671	289000	4510000	4302	20210614_HS_50ng_F3-1.raw	3	#CONTAM#cont|000133|;P13645|K1C10_HUMAN;#CONTAM#cont|000129|;#CONTAM#cont|000136|;#CONTAM#cont|000122|			FALSE
GSLVQASEANLQAAQDFVR	66.79	2003.01	19	1	1002.51	2	23.6064	339000	4740000	5399	20210614_HS_50ng_F3-3.raw	7	P19827|ITIH1_HUMAN			FALSE
GSPAINVAVHVFR	83.13	1365.75	13	0.9	683.882	2	21.864	5790000	66500000	4314	20210614_HS_50ng_F1-2.raw	10	P02766|TTHY_HUMAN;A0A087WT59|A0A087WT59_HUMAN			FALSE
GSSTWLTAFVLK	53.88	1308.71	12	3.1	655.363	2	27.2805	166000	2030000	7030	20210614_HS_50ng_F2-3.raw	2	A0A140TA29|A0A140TA29_HUMAN;P0C0L5|CO4B_HUMAN;F5GXS0|F5GXS0_HUMAN;A0A3B3ISA6|A0A3B3ISA6_HUMAN;A0A0G2JL54|A0A0G2JL54_HUMAN			FALSE
GTEAAGAM(+15.99)FLE(+21.98)AIPM(+15.99)SIPPEVK	46.49	2312.1	22	-1.6	771.707	3	25.8627	89200	631000	5969	20210614_HS_50ng_F4-1.raw	1		Oxidation (M); Sodium adduct; Oxidation (M)	M8:Oxidation (M):1000.00;E11:Sodium adduct:1.33;M15:Oxidation (M):1000.00	FALSE
GTEAAGAM(+15.99)FLEAIPM(+15.99)SIPPEVK	40.49	2290.12	22	-1.2	764.38	3	25.896	2820000	10200000	6104	20210614_HS_50ng_F4-1.raw	4		Oxidation (M); Oxidation (M)		FALSE
GTWTQPFDLASTR	52.28	1478.72	13	4.2	740.368	2	21.9733	393000	4420000	5026	20210614_HS_50ng_F3-1.raw	3	P08185|CBG_HUMAN			FALSE
GVALHRPDVYLLPPAR	70.8	1773	16	1.1	444.258	4	22.1785	3640000	18600000	4380	20210614_HS_50ng_F1-2.raw	7	P01871|IGHM_HUMAN			FALSE
GVTSVSQIFHSPDLAIR	66.28	1825.97	17	0.7	913.992	2	24.2032	3440000	15000000	6566	20210614_HS_50ng_F2-1.raw	7	H9KV48|H9KV48_HUMAN;P05155|IC1_HUMAN;E9PGN7|E9PGN7_HUMAN			FALSE
GWVDLFVPK	36.77	1059.58	9	0.7	530.795	2	25.7843	61300	877000	6671	20210614_HS_50ng_F2-3.raw	2	#CONTAM#cont|000072|;P05543|THBG_HUMAN			FALSE
GWVTDGFSSLK	50.24	1195.59	11	3.1	598.803	2	21.6214	239000	2750000	5394	20210614_HS_50ng_F2-3.raw	3	P02656|APOC3_HUMAN;B0YIW2|B0YIW2_HUMAN			FALSE
GYILVGQAK	39.79	947.544	9	-2.1	474.778	2	14.5618	140000	646000	3074	20210614_HS_50ng_F2-2.raw	1	P04003|C4BPA_HUMAN			FALSE
GYTQQLAFR	62.83	1082.55	9	0.9	542.283	2	16.7362	13100000	114000000	3789	20210614_HS_50ng_F2-2.raw	11	P01024|CO3_HUMAN			FALSE
HLSLLTTLSNR	85.9	1253.71	11	2.9	418.911	3	20.9849	1490000	9200000	4129	20210614_HS_50ng_F1-2.raw	7	D6RBJ7|D6RBJ7_HUMAN;P02774|VTDB_HUMAN;D6RF35|D6RF35_HUMAN			FALSE
HNVYIN(+0.98)GITYTPVSSTNEK	73.51	2137.03	19	-0.4	713.351	3	19.0905	8230000	43600000	4768	20210614_HS_50ng_F2-1.raw	15	P01023|A2MG_HUMAN	Deamidation (NQ)	N6:Deamidation (NQ):49.79	FALSE
HPDYSVVLLLR	66.76	1310.73	11	-0.3	656.373	2	24.3939	8530000	93900000	4786	20210614_HS_50ng_F1-2.raw	19	A0A0C4DGB6|A0A0C4DGB6_HUMAN;P02768|ALBU_HUMAN;C9JKR2|C9JKR2_HUMAN;D6RHD5|D6RHD5_HUMAN;B7WNR0|B7WNR0_HUMAN;H0YA55|H0YA55_HUMAN			FALSE
HPYFYAPELLFFAK	75.88	1741.89	14	3.6	581.638	3	30.262	3550000	6840000	7086	20210614_HS_50ng_F2-2.raw	9	A0A0C4DGB6|A0A0C4DGB6_HUMAN;P02768|ALBU_HUMAN;H7C013|H7C013_HUMAN;D6RHD5|D6RHD5_HUMAN;B7WNR0|B7WNR0_HUMAN;H0YA55|H0YA55_HUMAN			FALSE
HQFLLTGDTQGR	57.63	1371.69	12	-1.8	458.236	3	14.8953	739000	3240000	2755	20210614_HS_50ng_F1-3b.raw	7	P04217|A1BG_HUMAN;M0R009|M0R009_HUMAN			FALSE
HQPQEFPTYVEPTNDEIC(+57.02)EAFR	80.35	2706.2	22	2.3	903.077	3	23.7017	1730000	13100000	6109	20210614_HS_50ng_F2-3.raw	6	D6RBJ7|D6RBJ7_HUMAN;P02774|VTDB_HUMAN;D6RF35|D6RF35_HUMAN	Carbamidomethylation	C18:Carbamidomethylation:1000.00	FALSE
HQQTVTIPPK	42.84	1147.63	10	0.2	574.823	2	9.3371	808000	619000	1238	20210614_HS_50ng_F1-2.raw	2	P01024|CO3_HUMAN			FALSE
HRLEDM(+15.99)EQALSPSVFK	55.37	1901.93	16	0.6	634.985	3	18.7307	253000	2740000	3923	20210614_HS_50ng_F1-1.raw	3	P05155|IC1_HUMAN;E9PGN7|E9PGN7_HUMAN	Oxidation (M)		FALSE
HSIFTPETNPR	52.09	1297.64	11	1.3	649.827	2	13.53	403000	1620000	2402	20210614_HS_50ng_F1-2.raw	4	P00747|PLMN_HUMAN			FALSE
HSTIFENLANK	73.24	1272.65	11	-3.4	637.328	2	17.0497	37400000	253000000	3463	20210614_HS_50ng_F1-3b.raw	33	C9JVG0|C9JVG0_HUMAN;P02787|TRFE_HUMAN			FALSE
HTFM(+15.99)GVVSLGSPSGEVSHPR	86.89	2096.01	20	3.5	525.012	4	18.8667	3050000	30400000	3784	20210614_HS_50ng_F1-3b.raw	7	P02765|FETUA_HUMAN;C9JV77|C9JV77_HUMAN	Oxidation (M)		FALSE
HTLNQIDEVK	54.53	1195.62	10	0	598.817	2	7.2867	3220000	17600000	1286	20210614_HS_50ng_F1-3b.raw	4	P02765|FETUA_HUMAN;C9JV77|C9JV77_HUMAN			FALSE
IADVTSGLIGGEDGR	62.54	1458.73	15	-2.7	730.371	2	18.3212	190000	1880000	3678	20210614_HS_50ng_F3-3.raw	3				FALSE
IAELSATAQEIIK	53.03	1385.78	13	0.1	693.896	2	21.322	2080000	20200000	4357	20210614_HS_50ng_F3-2.raw	6	P04114|APOB_HUMAN			FALSE
IAPANADFAFR	37.17	1191.6	11	3.3	596.811	2	19.7245	290000	3630000	4565	20210614_HS_50ng_F2-2.raw	2	P29622|KAIN_HUMAN			FALSE
IAPQLSTEELVSLGEK	62.68	1712.92	16	2.9	857.47	2	22.8715	1770000	16600000	5328	20210614_HS_50ng_F3-1.raw	5	P43652|AFAM_HUMAN			FALSE
IAQWQSFQLEGGLK	69.6	1603.84	14	1.4	802.926	2	23.3539	5300000	61400000	5517	20210614_HS_50ng_F3-1.raw	12	P01023|A2MG_HUMAN			FALSE
IASFSQNC(+57.02)DIYPGK	66.26	1598.74	14	2	800.379	2	18.0619	1550000	12500000	3599	20210614_HS_50ng_F3-3.raw	3	P01042|KNG1_HUMAN	Carbamidomethylation	C8:Carbamidomethylation:1000.00	FALSE
IAYGTQGSSGYSLR	58.59	1458.71	14	-3.2	730.36	2	16.0004	323000	2360000	3030	20210614_HS_50ng_F3-3.raw	3	H0YAC1|H0YAC1_HUMAN;E9PBC5|E9PBC5_HUMAN;P03952|KLKB1_HUMAN			FALSE
IDDIWNLEVK	52.55	1243.64	10	3.4	622.832	2	23.2348	1790000	15000000	5944	20210614_HS_50ng_F2-3.raw	7	P04114|APOB_HUMAN			FALSE
IDSLLENDR	45.97	1073.54	9	-1.7	537.774	2	11.0727	1760000	6950000	2316	20210614_HS_50ng_F2-2.raw	4	H0YLK8|H0YLK8_HUMAN;P10909|CLUS_HUMAN;H0YC35|H0YC35_HUMAN;E7ETB4|E7ETB4_HUMAN;E7ERK6|E7ERK6_HUMAN			FALSE
IDTQDIEASHYR	42.66	1446.67	12	-2.1	483.231	3	14.4456	262000	1400000	2993	20210614_HS_50ng_F2-3.raw	2	P01031|CO5_HUMAN			FALSE
IDVHLVPDR	56.76	1062.58	9	2.1	532.298	2	17.3446	926000	4210000	3235	20210614_HS_50ng_F1-2.raw	3	P08603|CFAH_HUMAN			FALSE
IEC(+57.02)VSAE(+21.98)TTEDC(+57.02)IAK	47.04	1746.74	15	1	583.255	3	15.6168	1800000	5430000	2930	20210614_HS_50ng_F3-3.raw	2	P02787|TRFE_HUMAN	Carbamidomethylation; Sodium adduct; Carbamidomethylation	C3:Carbamidomethylation:1000.00;E7:Sodium adduct:11.27;C12:Carbamidomethylation:1000.00	FALSE
IEC(+57.02)VSAETTED(+21.98)C(+57.02)IAK	35.63	1746.74	15	-0.2	874.378	2	13.6268	1960000	4160000	2666	20210614_HS_50ng_F3-1.raw	3	P02787|TRFE_HUMAN	Carbamidomethylation; Sodium adduct; Carbamidomethylation	C3:Carbamidomethylation:1000.00;D11:Sodium adduct:0.00;C12:Carbamidomethylation:1000.00	FALSE
IEC(+57.02)VSAETTEDC(+57.02)IAK	66.13	1724.76	15	1.9	863.389	2	16.0525	28000000	241000000	2761	20210614_HS_50ng_F4-2.raw	27	P02787|TRFE_HUMAN	Carbamidomethylation; Carbamidomethylation	C3:Carbamidomethylation:1000.00;C12:Carbamidomethylation:1000.00	FALSE
IEDGFSLK	40.93	907.465	8	-2.7	454.739	2	15.6397	4640000	17400000	3267	20210614_HS_50ng_F2-2.raw	3	P01008|ANT3_HUMAN			FALSE
IEGNLIFDPNNYLPK	57.66	1745.9	15	1.8	873.958	2	26.1169	1850000	12200000	6021	20210614_HS_50ng_F3-3.raw	4	A8MUN2|A8MUN2_HUMAN;P04114|APOB_HUMAN			FALSE
IEIPLPFGGK	50.97	1069.62	10	3.4	535.818	2	24.7952	3660000	22700000	6382	20210614_HS_50ng_F2-3.raw	4	P04114|APOB_HUMAN			FALSE
IEISELNR	36.78	972.524	8	-1	487.269	2	13.7244	13100000	42400000	3183	20210614_HS_50ng_F2-1.raw	5	#CONTAM#cont|000132|;P35908|K22E_HUMAN;#CONTAM#cont|000135|;#CONTAM#cont|000134|;P04264|K2C1_HUMAN			FALSE
IFFYDSENPPASEVLR	62.76	1882.91	16	-0.8	942.462	2	23.7466	1540000	9580000	5629	20210614_HS_50ng_F3-1.raw	6	P27169|PON1_HUMAN			FALSE
IGESIELTC(+57.02)PK	57.65	1245.63	11	0.1	623.821	2	17.4247	136000	1280000	3412	20210614_HS_50ng_F3-3.raw	3	P13671|CO6_HUMAN	Carbamidomethylation	C9:Carbamidomethylation:1000.00	FALSE
IGQDGISTSATTNLK	71.83	1504.77	15	-1.6	753.393	2	15.8283	3450000	20500000	2938	20210614_HS_50ng_F3-2.raw	5	P04114|APOB_HUMAN			FALSE
IHSGSFQSQVELSNDQEK	68.8	2031.95	18	-0.4	678.324	3	16.0217	1060000	7630000	3454	20210614_HS_50ng_F2-3.raw	3	P04114|APOB_HUMAN			FALSE
IITHPN(+0.98)FNGNTLDNDIM(+15.99)LIK	41.86	2299.15	20	1.8	767.393	3	25.5204			6585	20210614_HS_50ng_F2-3.raw	1	#CONTAM#cont|000144|;#CONTAM#cont|000142|;#CONTAM#cont|000023|;#CONTAM#cont|000143|;#CONTAM#cont|000141|;#CONTAM#cont|000040|;#CONTAM#cont|000032|	Deamidation (NQ); Oxidation (M)	N6:Deamidation (NQ):9.40;M17:Oxidation (M):1000.00	FALSE
IITHPNFN(+0.98)GNTLDN(+0.98)DIM(+15.99)LIK	41.7	2300.14	20	2.6	767.721	3	23.6293	10000	446000	5405	20210614_HS_50ng_F3-3.raw	1	#CONTAM#cont|000144|;#CONTAM#cont|000142|;#CONTAM#cont|000023|;#CONTAM#cont|000143|;#CONTAM#cont|000141|;#CONTAM#cont|000040|;#CONTAM#cont|000032|	Deamidation (NQ); Deamidation (NQ); Oxidation (M)	N8:Deamidation (NQ):0.00;N14:Deamidation (NQ):42.68;M17:Oxidation (M):1000.00	FALSE
IITHPNFN(+0.98)GNTLDNDIM(+15.99)LIK	67.2	2299.15	20	2.1	767.393	3	24.9843	8170000	51200000	6134	20210614_HS_50ng_F2-2.raw	8	#CONTAM#cont|000144|;#CONTAM#cont|000142|;#CONTAM#cont|000023|;#CONTAM#cont|000143|;#CONTAM#cont|000141|;#CONTAM#cont|000040|;#CONTAM#cont|000032|	Deamidation (NQ); Oxidation (M)	N8:Deamidation (NQ):18.53;M17:Oxidation (M):1000.00	FALSE
IITHPNFN(+0.98)GNTLDNDIMLIK	24.94	2283.16	20	1.8	762.061	3	25.177	35800	627000	6866	20210614_HS_50ng_F2-1.raw	1	#CONTAM#cont|000144|;#CONTAM#cont|000142|;#CONTAM#cont|000023|;#CONTAM#cont|000143|;#CONTAM#cont|000141|;#CONTAM#cont|000040|;#CONTAM#cont|000032|	Deamidation (NQ)	N8:Deamidation (NQ):0.00	FALSE
IITHPNFNGNTLDN(+0.98)DIM(+15.99)LIK	51.75	2299.15	20	3.7	767.394	3	23.945	239000	2950000	5826	20210614_HS_50ng_F2-2.raw	2	#CONTAM#cont|000144|;#CONTAM#cont|000142|;#CONTAM#cont|000023|;#CONTAM#cont|000143|;#CONTAM#cont|000141|;#CONTAM#cont|000040|;#CONTAM#cont|000032|	Deamidation (NQ); Oxidation (M)	N14:Deamidation (NQ):33.81;M17:Oxidation (M):1000.00	FALSE
IITHPNFNGNTLDNDIM(+15.99)LIK	67.26	2298.17	20	-2.5	767.061	3	24.5945	6410000	58900000	5990	20210614_HS_50ng_F2-2.raw	6	#CONTAM#cont|000144|;#CONTAM#cont|000142|;#CONTAM#cont|000023|;#CONTAM#cont|000143|;#CONTAM#cont|000141|;#CONTAM#cont|000040|;#CONTAM#cont|000032|	Oxidation (M)		FALSE
ILDDLSPR	35.51	927.503	8	-0.9	464.758	2	14.6921	2030000	7230000	3054	20210614_HS_50ng_F2-3.raw	2	Q14624|ITIH4_HUMAN;B7ZKJ8|B7ZKJ8_HUMAN;H7C0L5|H7C0L5_HUMAN			FALSE
ILGGHLDAK	50.33	922.524	9	-3.4	462.267	2	6.8457	7080000	25600000	1258	20210614_HS_50ng_F1-3b.raw	9	P00738|HPT_HUMAN;A0A0A0MRD9|A0A0A0MRD9_HUMAN;A0A087WU08|A0A087WU08_HUMAN;H0Y300|H0Y300_HUMAN;A0A0C4DGL8|A0A0C4DGL8_HUMAN;J3QR68|J3QR68_HUMAN;P00739|HPTR_HUMAN			FALSE
ILIGTVFHK	37.61	1026.62	9	-0.2	514.318	2	20.0918	227000	1930000	4329	20210614_HS_50ng_F1-1.raw	3				FALSE
ILLQGTPVAQ(+0.98)M(+15.99)TEDAVDAER	50.38	2173.06	20	8.5	725.366	3	22.3672	125000	6060000	4500	20210614_HS_50ng_F4-3.raw	2	P01024|CO3_HUMAN	Deamidation (NQ); Oxidation (M)	Q10:Deamidation (NQ):6.67;M11:Oxidation (M):1000.00	FALSE
ILLQGTPVAQM(+15.99)TE(+21.98)DAVDAER	57.24	2194.06	20	-9.3	732.352	3	20.8064	1260000	24400000	4551	20210614_HS_50ng_F4-1.raw	3	P01024|CO3_HUMAN	Oxidation (M); Sodium adduct	M11:Oxidation (M):1000.00;E13:Sodium adduct:17.01	FALSE
ILLQGTPVAQM(+15.99)TEDAVDAER	72.08	2172.07	20	-6.3	725.027	3	20.8485	22300000	238000000	4540	20210614_HS_50ng_F4-1.raw	22	P01024|CO3_HUMAN	Oxidation (M)		FALSE
IM(+15.99)N(+0.98)GEADAM(+15.99)SLDGGFVYIAGK	59.17	2190.98	21	-0.5	731.334	3	22.5052	4680000	21100000	5221	20210614_HS_50ng_F4-1.raw	3	P02787|TRFE_HUMAN	Oxidation (M); Deamidation (NQ); Oxidation (M)		FALSE
IM(+15.99)NGEADAM(+15.99)SLDGGFVYIAGK	72.68	2190	21	-2.1	731.005	3	22.9103	1740000	16500000	4241	20210614_HS_50ng_F4-2.raw	9	P02787|TRFE_HUMAN	Oxidation (M); Oxidation (M)		FALSE
IN(+0.98)NQLTLDSNTK	55.12	1360.68	12	0	681.349	2	12.5623	679000	1640000	2288	20210614_HS_50ng_F3-3.raw	2	P04114|APOB_HUMAN	Deamidation (NQ)	N2:Deamidation (NQ):0.00	FALSE
INNQLTLDSNTK	51.78	1359.7	12	-2.6	680.855	2	11.5638	155000	441000	2130	20210614_HS_50ng_F3-3.raw	1	P04114|APOB_HUMAN			FALSE
IPGIFELGISSQSDR	62.83	1617.84	15	4.2	809.929	2	24.7563	235000	2110000	5710	20210614_HS_50ng_F3-3.raw	2	F5GY80|F5GY80_HUMAN;P07358|CO8B_HUMAN;F5H7G1|F5H7G1_HUMAN			FALSE
IPIE(+21.98)DGSGEVVLSR	43.03	1491.75	14	-0.8	746.884	2	18.5155	462000	4930000	3862	20210614_HS_50ng_F3-1.raw	2	P01024|CO3_HUMAN	Sodium adduct	E4:Sodium adduct:24.44	FALSE
IPIEDGSGE(+21.98)VVLSR	58.55	1491.75	14	-1.1	498.258	3	18.7789	1540000	11200000	3809	20210614_HS_50ng_F3-3.raw	4	P01024|CO3_HUMAN	Sodium adduct	E9:Sodium adduct:17.65	FALSE
IPIEDGSGEVVLSR	69.38	1469.77	14	-6.3	735.889	2	18.799	7590000	58300000	3959	20210614_HS_50ng_F3-1.raw	26	P01024|CO3_HUMAN			FALSE
IPLDLVPK	42.65	893.559	8	-0.5	447.786	2	19.8165	1070000	8930000	5009	20210614_HS_50ng_F2-1.raw	3	P01031|CO5_HUMAN			FALSE
IPSVQINFK	57.27	1044.6	9	4.3	523.308	2	20.2513	4710000	36200000	5167	20210614_HS_50ng_F2-1.raw	3	P04114|APOB_HUMAN			FALSE
IPTTFEN(+0.98)GR	47.61	1034.5	9	-1.5	518.258	2	12.1089	1910000	5730000	2400	20210614_HS_50ng_F2-3.raw	4	C9JX71|C9JX71_HUMAN;P05090|APOD_HUMAN;C9JF17|C9JF17_HUMAN	Deamidation (NQ)		FALSE
IQNILTEEPK	52.17	1183.64	10	2.1	592.831	2	16.8329	4600000	29400000	3697	20210614_HS_50ng_F2-3.raw	5	P27169|PON1_HUMAN			FALSE
IQPSGGTNINEALLR	60.64	1581.85	15	-0.9	528.289	3	19.0955	8090000	83400000	4038	20210614_HS_50ng_F3-1.raw	13	#CONTAM#cont|000108|;Q5T985|Q5T985_HUMAN;P19823|ITIH2_HUMAN			FALSE
ISLPESLK	42.96	885.517	8	-1.2	443.765	2	17.7247	16100000	99300000	4243	20210614_HS_50ng_F2-1.raw	6	P01024|CO3_HUMAN			FALSE
ITENDIQIALDDAK	62.63	1557.79	14	1.1	779.902	2	21.337	1660000	22500000	4627	20210614_HS_50ng_F3-3.raw	5	P04114|APOB_HUMAN			FALSE
ITHYNYLILSK	51.25	1363.75	11	-2.1	455.59	3	19.7325	32700	417000	4227	20210614_HS_50ng_F1-1.raw	1	P01031|CO5_HUMAN			FALSE
ITLLSALVETR	57.18	1214.72	11	0.5	608.369	2	25.1456	7540000	58900000	5794	20210614_HS_50ng_F3-3.raw	7	G3V3A0|G3V3A0_HUMAN;P01011|AACT_HUMAN			FALSE
ITLPDFR	39.59	860.476	7	2	431.246	2	20.9044	2880000	27600000	4901	20210614_HS_50ng_F2-2.raw	4	P04114|APOB_HUMAN			FALSE
ITLPDFTGDLR	46.86	1246.66	11	2.3	624.337	2	23.9385	126000	1290000	5498	20210614_HS_50ng_F3-3.raw	2	P18428|LBP_HUMAN			FALSE
ITQVLHFTK	49.89	1085.62	9	1.4	543.82	2	16.6939	661000	3710000	3192	20210614_HS_50ng_F1-3b.raw	3	A0A140TA32|A0A140TA32_HUMAN;A0A140TA29|A0A140TA29_HUMAN;P0C0L4|CO4A_HUMAN;P0C0L5|CO4B_HUMAN;A0A0G2JPR0|A0A0G2JPR0_HUMAN;A0A140TA49|A0A140TA49_HUMAN;F5GXS0|F5GXS0_HUMAN;A0A140TA44|A0A140TA44_HUMAN;A0A3B3ISA6|A0A3B3ISA6_HUMAN;A0A0G2JL54|A0A0G2JL54_HUMAN			FALSE
IVIEYVDR	42.11	1005.55	8	1	503.783	2	17.3413	1130000	7700000	3884	20210614_HS_50ng_F2-3.raw	3	G3XAM2|G3XAM2_HUMAN;A0A2R8Y3M9|A0A2R8Y3M9_HUMAN;E7ETH0|E7ETH0_HUMAN;P05156|CFAI_HUMAN			FALSE
IVLGQEQDSYGGK	54.04	1392.69	13	-1.5	697.351	2	12.459	1950000	2940000	2251	20210614_HS_50ng_F3-3.raw	3	P02743|SAMP_HUMAN			FALSE
IVQILPWEQNEQVK	55.78	1722.93	14	-0.7	862.472	2	23.4417	1030000	15200000	5521	20210614_HS_50ng_F3-1.raw	3	A8MUN2|A8MUN2_HUMAN;P04114|APOB_HUMAN			FALSE
IVSSAM(+15.99)EPDREYHFGQAVR	78.7	2207.04	19	3.2	552.77	4	17.1657	1590000	15200000	3338	20210614_HS_50ng_F1-3b.raw	5	A0A0D9SG88|A0A0D9SG88_HUMAN;P08603|CFAH_HUMAN	Oxidation (M)		FALSE
IWDVVEK	38.93	887.475	7	-2.7	444.744	2	14.7682	5790000	45200000	3323	20210614_HS_50ng_F2-1.raw	6	P01024|CO3_HUMAN			FALSE
KAADDTWEPFASGK	63.77	1521.71	14	2.5	761.864	2	18.0291	1200000	9590000	4127	20210614_HS_50ng_F2-3.raw	5	P02766|TTHY_HUMAN;A0A087WT59|A0A087WT59_HUMAN			FALSE
KADGSYAAWLSR	64.25	1323.66	12	1.3	442.227	3	18.5028	216000	1230000	3703	20210614_HS_50ng_F1-3b.raw	2	A0A140TA32|A0A140TA32_HUMAN;A0A140TA29|A0A140TA29_HUMAN;P0C0L4|CO4A_HUMAN;P0C0L5|CO4B_HUMAN;A0A0G2JPR0|A0A0G2JPR0_HUMAN;A0A140TA49|A0A140TA49_HUMAN;F5GXS0|F5GXS0_HUMAN;A0A140TA44|A0A140TA44_HUMAN;A0A3B3ISA6|A0A3B3ISA6_HUMAN;A0A0G2JL54|A0A0G2JL54_HUMAN			FALSE
KAEEEHLGILGPQLHADVGDK	79.62	2255.15	21	2.6	564.797	4	19.718	2670000	21900000	4221	20210614_HS_50ng_F1-1.raw	6	E9PFZ2|E9PFZ2_HUMAN;H7C5R1|H7C5R1_HUMAN;P00450|CERU_HUMAN			FALSE
KC(+57.02)SYTEDAQC(+57.02)IDGTIEVPK	57.79	2213	19	2.1	738.675	3	19.5116	273000	3890000	4481	20210614_HS_50ng_F2-2.raw	3	P02749|APOH_HUMAN	Carbamidomethylation; Carbamidomethylation	C2:Carbamidomethylation:1000.00;C10:Carbamidomethylation:1000.00	FALSE
KDSGFQM(+15.99)NQLR	49.91	1338.63	11	-2.2	447.218	3	6.2796	636000	987000	1075	20210614_HS_50ng_F1-3b.raw	2	P02787|TRFE_HUMAN	Oxidation (M)		FALSE
KDTVIKPLLVEPEGLEK	73.47	1907.1	17	3.7	477.782	4	22.2638	1520000	13900000	4400	20210614_HS_50ng_F1-2.raw	6	P01023|A2MG_HUMAN			FALSE
KEAGIPEFYDYDVALIK	63.09	1970	17	-5.6	657.671	3	25.6657	19900	710000	6634	20210614_HS_50ng_F2-3.raw	2	H7C5H1|H7C5H1_HUMAN;E7ETN3|E7ETN3_HUMAN;P00751|CFAB_HUMAN;A0A0G2JH38|A0A0G2JH38_HUMAN;B4E1Z4|B4E1Z4_HUMAN			FALSE
KEDSC(+57.02)QLGYSAGPC(+57.02)M(+15.99)GM(+15.99)TSR	47.21	2265.91	20	-1.7	756.31	3	8.0786			1603	20210614_HS_50ng_F2-2.raw	1	P02760|AMBP_HUMAN;S4R471|S4R471_HUMAN	Carbamidomethylation; Carbamidomethylation; Oxidation (M); Oxidation (M)	C5:Carbamidomethylation:1000.00;C14:Carbamidomethylation:1000.00	FALSE
KFPSGTFEQVSQLVK	58.47	1693.9	15	3	565.644	3	23.3835	3260000	16300000	5645	20210614_HS_50ng_F2-2.raw	6	D6RBJ7|D6RBJ7_HUMAN;P02774|VTDB_HUMAN;D6RF20|D6RF20_HUMAN;D6RF35|D6RF35_HUMAN			FALSE
KGDTFSC(+57.02)M(+15.99)VGHEALPLAFTQK	72.39	2352.12	21	3.8	785.052	3	22.4447	2460000	23700000	4695	20210614_HS_50ng_F1-3b.raw	8	P01876|IGHA1_HUMAN;A0A286YEY1|A0A286YEY1_HUMAN	Carbamidomethylation; Oxidation (M)	C7:Carbamidomethylation:1000.00	FALSE
KGEWVALNPLR	66.54	1281.72	11	1.1	428.248	3	21.0272	584000	4760000	4569	20210614_HS_50ng_F1-1.raw	5	A0A0D9SG88|A0A0D9SG88_HUMAN;P08603|CFAH_HUMAN;Q5TFM2|Q5TFM2_HUMAN			FALSE
KLSSWVLLM(+15.99)K	47.76	1219.7	10	3.8	610.858	2	21.7886	1740000	8250000	4295	20210614_HS_50ng_F1-2.raw	3		Oxidation (M)		FALSE
KLTISEQNIQR	60.12	1328.74	11	-2.2	443.919	3	13.5956	76100	442000	2417	20210614_HS_50ng_F1-2.raw	1	A8MUN2|A8MUN2_HUMAN;P04114|APOB_HUMAN			FALSE
KLVAASQAALGL	57.5	1140.69	12	-0.7	571.35	2	19.3507	41700000	538000000	4849	20210614_HS_50ng_F2-1.raw	13	A0A087WWT3|A0A087WWT3_HUMAN;P02768|ALBU_HUMAN;C9JKR2|C9JKR2_HUMAN;D6RHD5|D6RHD5_HUMAN;B7WNR0|B7WNR0_HUMAN;H0YA55|H0YA55_HUMAN			FALSE
KM(+15.99)TSNFPVDLSDYPK	37.54	1756.83	15	3.2	586.62	3	20.5154	100000	1120000	5005	20210614_HS_50ng_F2-3.raw	2	P04114|APOB_HUMAN	Oxidation (M)		FALSE
KPDVSHGEM(+15.99)VSGFGPIYNYK	72.02	2240.06	20	4.8	561.024	4	19.8821	913000	8460000	4073	20210614_HS_50ng_F1-3b.raw	5	P04003|C4BPA_HUMAN	Oxidation (M)		FALSE
KPVAFSDYIHPVC(+57.02)LPDR	71.11	2013.01	17	-1.5	504.26	4	22.8743	73000	990000	5055	20210614_HS_50ng_F1-1.raw	2	P00734|THRB_HUMAN	Carbamidomethylation	C13:Carbamidomethylation:1000.00	FALSE
KPVDEYKDC(+57.02)HLAQ(+0.98)VPSHTVVAR	59.96	2549.27	22	5.5	510.864	5	17.0749			3301	20210614_HS_50ng_F1-3b.raw	1	P02787|TRFE_HUMAN	Carbamidomethylation; Deamidation (NQ)	C9:Carbamidomethylation:1000.00	FALSE
KPVDEYKDC(+57.02)HLAQVPSHTVVAR	72.97	2548.29	22	0.7	510.663	5	17.4958	3930000	32800000	3290	20210614_HS_50ng_F1-2.raw	6	P02787|TRFE_HUMAN	Carbamidomethylation	C9:Carbamidomethylation:1000.00	FALSE
KPVEEYAN(+0.98)C(+57.02)HLAR	46.84	1586.75	13	9.1	529.928	3	7.6278			1351	20210614_HS_50ng_F1-2.raw	1	P02787|TRFE_HUMAN	Deamidation (NQ); Carbamidomethylation	C9:Carbamidomethylation:1000.00	FALSE
KPVEEYANC(+57.02)HLAR	48.55	1585.77	13	-2.3	529.595	3	8.1614	5730000	36700000	1544	20210614_HS_50ng_F3-2.raw	11	P02787|TRFE_HUMAN	Carbamidomethylation	C9:Carbamidomethylation:1000.00	FALSE
KQTALVELVK	51.61	1127.69	10	-2.8	564.851	2	17.1016	162000000	810000000	3477	20210614_HS_50ng_F1-3b.raw	36	A0A0C4DGB6|A0A0C4DGB6_HUMAN;A0A087WWT3|A0A087WWT3_HUMAN;P02768|ALBU_HUMAN;C9JKR2|C9JKR2_HUMAN;D6RHD5|D6RHD5_HUMAN;B7WNR0|B7WNR0_HUMAN;H0YA55|H0YA55_HUMAN			FALSE
KSASDLTWDNLK	57.76	1376.69	12	0	459.905	3	17.9523	1690000	10700000	3553	20210614_HS_50ng_F1-3b.raw	7	H7C5E8|H7C5E8_HUMAN;P02787|TRFE_HUMAN			FALSE
KSDVGFLPPFPTLDPEEK	48.71	2015.03	18	0.2	672.682	3	26.4607	152000	1560000	6851	20210614_HS_50ng_F2-3.raw	2	P43652|AFAM_HUMAN			FALSE
KVPQ(+0.98)VSTPTLVE(+21.98)VSR	39.12	1661.9	15	1.8	416.482	4	19.1351			4786	20210614_HS_50ng_F2-1.raw	1	A0A0C4DGB6|A0A0C4DGB6_HUMAN;#CONTAM#cont|000097|;#CONTAM#cont|000035|;A0A087WWT3|A0A087WWT3_HUMAN;P02768|ALBU_HUMAN;#CONTAM#cont|000017|;C9JKR2|C9JKR2_HUMAN;D6RHD5|D6RHD5_HUMAN;B7WNR0|B7WNR0_HUMAN;H0YA55|H0YA55_HUMAN	Deamidation (NQ); Sodium adduct	Q4:Deamidation (NQ):1000.00;E12:Sodium adduct:38.16	FALSE
KVPQVSTPTLVE(+21.98)VSR	38.43	1660.91	15	-0.2	554.645	3	19.4601	24200000	95300000	4638	20210614_HS_50ng_F2-3.raw	10	A0A0C4DGB6|A0A0C4DGB6_HUMAN;#CONTAM#cont|000097|;#CONTAM#cont|000035|;A0A087WWT3|A0A087WWT3_HUMAN;P02768|ALBU_HUMAN;#CONTAM#cont|000017|;C9JKR2|C9JKR2_HUMAN;D6RHD5|D6RHD5_HUMAN;B7WNR0|B7WNR0_HUMAN;H0YA55|H0YA55_HUMAN	Sodium adduct	E12:Sodium adduct:20.70	FALSE
KVPQVSTPTLVEVSR	86.88	1638.93	15	-2.3	547.316	3	20.047	449000000	3860000000	3193	20210614_HS_50ng_F5-2.raw	168	A0A0C4DGB6|A0A0C4DGB6_HUMAN;#CONTAM#cont|000097|;#CONTAM#cont|000035|;A0A087WWT3|A0A087WWT3_HUMAN;P02768|ALBU_HUMAN;#CONTAM#cont|000017|;C9JKR2|C9JKR2_HUMAN;D6RHD5|D6RHD5_HUMAN;B7WNR0|B7WNR0_HUMAN;H0YA55|H0YA55_HUMAN			FALSE
KYLYEIAR	53.01	1054.58	8	-3	528.296	2	14.3809	28000000	146000000	2867	20210614_HS_50ng_F1-1.raw	18	A0A0C4DGB6|A0A0C4DGB6_HUMAN;P02768|ALBU_HUMAN;H7C013|H7C013_HUMAN			FALSE
KYPVAHFIDQTLK	46.38	1558.85	13	1.1	520.625	3	20.1588	1140000	2890000	4324	20210614_HS_50ng_F1-1.raw	2	H9KV48|H9KV48_HUMAN;P05155|IC1_HUMAN;E9PGN7|E9PGN7_HUMAN			FALSE
KYTYNYEAESSSGVPGTADSR	51.56	2281.01	21	1.1	761.346	3	15.9924	304000	3300000	3438	20210614_HS_50ng_F2-3.raw	2	A8MUN2|A8MUN2_HUMAN;A0A669KB70|A0A669KB70_HUMAN;P04114|APOB_HUMAN			FALSE
KYVLPNFEVK	35	1235.69	10	0.3	618.853	2	20.8179	101000	1120000	4305	20210614_HS_50ng_F1-3b.raw	2	A0A140TA32|A0A140TA32_HUMAN;A0A140TA29|A0A140TA29_HUMAN;P0C0L4|CO4A_HUMAN;P0C0L5|CO4B_HUMAN;A0A0G2JPR0|A0A0G2JPR0_HUMAN;A0A140TA49|A0A140TA49_HUMAN;F5GXS0|F5GXS0_HUMAN;A0A140TA44|A0A140TA44_HUMAN;A0A0G2JL54|A0A0G2JL54_HUMAN			FALSE
LAAAVSNFGYDLYR	62.17	1558.78	14	3.6	780.399	2	22.7303	689000	5900000	5110	20210614_HS_50ng_F3-3.raw	3	I3L4Z0|I3L4Z0_HUMAN;P36955|PEDF_HUMAN;I3L2R7|I3L2R7_HUMAN			FALSE
LAEGFPLPLLK	46.35	1196.72	11	1.5	599.367	2	26.7097	78700	828000	6908	20210614_HS_50ng_F2-3.raw	1	P18428|LBP_HUMAN			FALSE
LAELPADALGPLQR	54.19	1462.81	14	2.2	732.416	2	22.5078	210000	3380000	5034	20210614_HS_50ng_F3-3.raw	3	P35858|ALS_HUMAN			FALSE
LAKTYETTLEK	38.24	1295.7	11	1	648.855	2	7.9111	244000	1310000	1407	20210614_HS_50ng_F1-2.raw	2	A0A0C4DGB6|A0A0C4DGB6_HUMAN;P02768|ALBU_HUMAN;C9JKR2|C9JKR2_HUMAN;D6RHD5|D6RHD5_HUMAN;B7WNR0|B7WNR0_HUMAN;H0YA55|H0YA55_HUMAN			FALSE
LALDN(+0.98)GGLAR	40.99	999.535	10	-1.8	500.774	2	15.3274	1280000	4080000	2819	20210614_HS_50ng_F3-2.raw	4	Q14624|ITIH4_HUMAN;B7ZKJ8|B7ZKJ8_HUMAN;H7C0L5|H7C0L5_HUMAN	Deamidation (NQ)		FALSE
LALDNGGLAR	36.5	998.551	10	0.1	500.283	2	15.0363	1060000	6390000	3137	20210614_HS_50ng_F2-3.raw	2	Q14624|ITIH4_HUMAN;B7ZKJ8|B7ZKJ8_HUMAN;H7C0L5|H7C0L5_HUMAN			FALSE
LALWGEHTGQLYSK	48.6	1601.82	14	2.6	534.949	3	20.6115	650000	5480000	5294	20210614_HS_50ng_F2-1.raw	3	P04114|APOB_HUMAN			FALSE
LATALSLSNK	46.39	1016.59	10	-1.3	509.3	2	15.1737	2070000	10400000	3147	20210614_HS_50ng_F2-2.raw	3	P04114|APOB_HUMAN			FALSE
LC(+57.02)M(+15.99)GSGLNLC(+57.02)EPNNK	66.34	1721.75	15	-0.6	861.884	2	16.3146	6980000	37500000	3105	20210614_HS_50ng_F3-3.raw	6	H7C5E8|H7C5E8_HUMAN;P02787|TRFE_HUMAN	Carbamidomethylation; Oxidation (M); Carbamidomethylation	C2:Carbamidomethylation:1000.00;C10:Carbamidomethylation:1000.00	FALSE
LC(+57.02)TVATLR	59.32	932.511	8	-2.1	467.262	2	14.5277	481000000	2940000000	3293	20210614_HS_50ng_F2-1.raw	95	A0A0C4DGB6|A0A0C4DGB6_HUMAN;A0A087WWT3|A0A087WWT3_HUMAN;P02768|ALBU_HUMAN;H7C013|H7C013_HUMAN	Carbamidomethylation	C2:Carbamidomethylation:1000.00	FALSE
LDAQASFLPK	56.04	1088.59	10	4.1	545.303	2	18.7394	7170000	41700000	4224	20210614_HS_50ng_F2-2.raw	6	P19827|ITIH1_HUMAN			FALSE
LDELRDEGK	50.07	1073.54	9	1.3	537.776	2	5.0819	82300000	259000000	865	20210614_HS_50ng_F1-3b.raw	65	A0A0C4DGB6|A0A0C4DGB6_HUMAN;P02768|ALBU_HUMAN;D6RHD5|D6RHD5_HUMAN;B7WNR0|B7WNR0_HUMAN;H0YA55|H0YA55_HUMAN			FALSE
LDFSSQADLR	48.25	1150.56	10	2.3	576.289	2	17.1088	1610000	15800000	3806	20210614_HS_50ng_F2-3.raw	3	P04114|APOB_HUMAN			FALSE
LDTLAQEVALLK	50.26	1312.76	12	1.4	657.388	2	23.9208	549000	4950000	5685	20210614_HS_50ng_F3-1.raw	3	P05452|TETN_HUMAN;E9PHK0|E9PHK0_HUMAN			FALSE
LDVTTSIGR	48.99	960.524	9	0.9	481.27	2	14.5778	792000	1210000	3030	20210614_HS_50ng_F2-3.raw	3	P04114|APOB_HUMAN			FALSE
LEALPNSLLAPLGR	57.73	1462.85	14	4.1	732.436	2	25.6515	103000	1050000	5924	20210614_HS_50ng_F3-3.raw	2	P35858|ALS_HUMAN			FALSE
LEDM(+15.99)EQALSPSVFK	68.14	1608.77	14	-0.5	805.392	2	19.77	7260000	69500000	4115	20210614_HS_50ng_F3-3.raw	11	P05155|IC1_HUMAN;E9PGN7|E9PGN7_HUMAN	Oxidation (M)		FALSE
LEIQSQVDSQHVGHSVLTAK	57.18	2175.13	20	5.1	544.792	4	18.2241	1520000	16500000	3623	20210614_HS_50ng_F1-3b.raw	6	P04114|APOB_HUMAN			FALSE
LELHVDGPPPRPQLR	59.03	1722.95	15	-2.2	431.745	4	19.4848	3480000	15700000	3930	20210614_HS_50ng_F1-3b.raw	7	P04217|A1BG_HUMAN			FALSE
LELSVDGAK	38.03	930.502	9	-1.7	466.258	2	13.8571	1520000	10800000	2862	20210614_HS_50ng_F2-2.raw	4	A0A140TA32|A0A140TA32_HUMAN;A0A140TA29|A0A140TA29_HUMAN;P0C0L4|CO4A_HUMAN;P0C0L5|CO4B_HUMAN;A0A0G2JPR0|A0A0G2JPR0_HUMAN;A0A140TA49|A0A140TA49_HUMAN;F5GXS0|F5GXS0_HUMAN;A0A140TA44|A0A140TA44_HUMAN;A0A3B3ISA6|A0A3B3ISA6_HUMAN;A0A0G2JL54|A0A0G2JL54_HUMAN			FALSE
LENEIQTYR	42.07	1164.58	9	1.3	583.297	2	11.4802	1940000	8560000	2248	20210614_HS_50ng_F2-3.raw	5	#CONTAM#cont|000133|;#CONTAM#cont|000131|;P13645|K1C10_HUMAN;#CONTAM#cont|000129|;#CONTAM#cont|000136|;#CONTAM#cont|000122|;#CONTAM#cont|000130|			FALSE
LEQEIATYR	38.21	1121.57	9	1.2	561.794	2	12.5059	104000	505000	2502	20210614_HS_50ng_F2-3.raw	1	P02533|K1C14_HUMAN;P08779|K1C16_HUMAN			FALSE
LEQGENVFLQATDK	60.14	1590.79	14	-0.8	796.401	2	18.8523	853000	6710000	3979	20210614_HS_50ng_F3-1.raw	2	A0A0A0MSV6|A0A0A0MSV6_HUMAN;P02746|C1QB_HUMAN;D6R934|D6R934_HUMAN			FALSE
LESEETM(+15.99)VLEAHDAQGDVPVTVTVHDFPGK	61.07	3265.54	30	2.6	817.396	4	22.7391	5780000	48300000	5773	20210614_HS_50ng_F2-3.raw	9	P01024|CO3_HUMAN	Oxidation (M)		FALSE
LFLEPTR	35.42	874.491	7	-2.4	438.252	2	16.2991	2050000	4750000	3479	20210614_HS_50ng_F2-2.raw	3	P00747|PLMN_HUMAN			FALSE
LGEHNIDVLE(+21.98)GNEQFINAAK	53.09	2232.08	20	1.4	745.034	3	22.2657	32700	805000	5634	20210614_HS_50ng_F2-3.raw	1	#CONTAM#cont|000144|;#CONTAM#cont|000142|;#CONTAM#cont|000023|;#CONTAM#cont|000143|;#CONTAM#cont|000141|;#CONTAM#cont|000040|;#CONTAM#cont|000032|	Sodium adduct	E10:Sodium adduct:0.00	FALSE
LGEHNIDVLEGN(+0.98)EQFINAAK	38.76	2211.08	20	4	738.037	3	26.1191	167000	1210000	7149	20210614_HS_50ng_F2-1.raw	2	#CONTAM#cont|000144|;#CONTAM#cont|000142|;#CONTAM#cont|000023|;#CONTAM#cont|000143|;#CONTAM#cont|000141|;#CONTAM#cont|000040|;#CONTAM#cont|000032|	Deamidation (NQ)	N12:Deamidation (NQ):7.32	FALSE
LGEHNIDVLEGNE(+21.98)QFINAAK	59.57	2232.08	20	4.1	745.037	3	21.9452	421000	6320000	5794	20210614_HS_50ng_F2-1.raw	1	#CONTAM#cont|000144|;#CONTAM#cont|000142|;#CONTAM#cont|000023|;#CONTAM#cont|000143|;#CONTAM#cont|000141|;#CONTAM#cont|000040|;#CONTAM#cont|000032|	Sodium adduct	E13:Sodium adduct:7.07	FALSE
LGEHNIDVLEGNEQFIN(+0.98)AAK	72.86	2211.08	20	2.8	738.036	3	22.2538	1500000	14800000	5350	20210614_HS_50ng_F2-2.raw	3	#CONTAM#cont|000144|;#CONTAM#cont|000142|;#CONTAM#cont|000023|;#CONTAM#cont|000143|;#CONTAM#cont|000141|;#CONTAM#cont|000040|;#CONTAM#cont|000032|	Deamidation (NQ)	N17:Deamidation (NQ):29.32	FALSE
LGEHNIDVLEGNEQFINAAK	72.88	2210.1	20	1.3	737.707	3	23.4801	26100000	321000000	5736	20210614_HS_50ng_F2-2.raw	26	#CONTAM#cont|000144|;#CONTAM#cont|000142|;#CONTAM#cont|000023|;#CONTAM#cont|000143|;#CONTAM#cont|000141|;#CONTAM#cont|000040|;#CONTAM#cont|000032|			FALSE
LGEVNTYAGDLQK	58.14	1406.7	13	-4.6	704.356	2	16.5928	541000	4930000	3188	20210614_HS_50ng_F3-3.raw	4	P06727|APOA4_HUMAN			FALSE
LGFTDLFSK	49.37	1026.54	9	3	514.278	2	23.9241	578000	4720000	6149	20210614_HS_50ng_F2-3.raw	2	P29622|KAIN_HUMAN			FALSE
LGM(+15.99)FNIQHC(+57.02)K	61.6	1262.59	10	-3.5	421.869	3	13.5461	2070000	3930000	2412	20210614_HS_50ng_F1-3b.raw	5		Oxidation (M); Carbamidomethylation	C9:Carbamidomethylation:1000.00	FALSE
LGPLVEQGR	41.22	967.545	9	-1.2	484.779	2	11.6172	90900	305000	2316	20210614_HS_50ng_F2-3.raw	1	E7ERP7|E7ERP7_HUMAN;E9PEV4|E9PEV4_HUMAN;P02649|APOE_HUMAN;H0Y7L5|H0Y7L5_HUMAN			FALSE
LGVYELLLK	46.52	1046.64	9	1.6	524.327	2	24.8187	4770000	46300000	6388	20210614_HS_50ng_F2-3.raw	6	Q14624|ITIH4_HUMAN;B7ZKJ8|B7ZKJ8_HUMAN;H7C0L5|H7C0L5_HUMAN			FALSE
LGYVTADGETSGSITC(+57.02)GK	70.14	1814.84	18	-1.4	908.424	2	15.6583	1000000	6440000	3114	20210614_HS_50ng_F3-1.raw	3	P08603|CFAH_HUMAN	Carbamidomethylation	C16:Carbamidomethylation:1000.00	FALSE
LHTEAQIQ(+0.98)EEGTVVELTGR	36.02	2110.05	19	9.4	704.365	3	21.2809			5555	20210614_HS_50ng_F2-1.raw	1	P01023|A2MG_HUMAN	Deamidation (NQ)	Q8:Deamidation (NQ):12.81	FALSE
LHTEAQIQEEGTVVELTGR	76.47	2109.07	19	2.9	704.033	3	20.2051	4610000	20800000	4702	20210614_HS_50ng_F2-2.raw	9	P01023|A2MG_HUMAN			FALSE
LIC(+57.02)QATGFSPR	62.09	1248.63	11	0.2	625.322	2	14.8641	11200000	81500000	3543	20210614_HS_50ng_F2-1.raw	8	P01871|IGHM_HUMAN	Carbamidomethylation	C3:Carbamidomethylation:1000.00	FALSE
LIDQYGTHYLQSGSLGGEYR	53.87	2256.08	20	2.4	753.036	3	20.8206	88800	2290000	5109	20210614_HS_50ng_F2-3.raw	3	P10643|CO7_HUMAN			FALSE
LIDVISM(+15.99)YR	43.01	1124.59	9	4.5	563.305	2	20.2399	1180000	7040000	4729	20210614_HS_50ng_F2-2.raw	2	P04114|APOB_HUMAN	Oxidation (M)		FALSE
LISVDTEHSNIYLQN(+0.98)GPDR	56.73	2171.05	19	3.8	724.693	3	19.6558	6170000	38400000	5164	20210614_HS_50ng_F2-1.raw	12	E9PFZ2|E9PFZ2_HUMAN;P00450|CERU_HUMAN	Deamidation (NQ)	N15:Deamidation (NQ):17.01	FALSE
LISVDTEHSNIYLQNGPDR	65.7	2170.07	19	1.1	724.363	3	20.2184	2260000	29100000	4704	20210614_HS_50ng_F2-2.raw	5	E9PFZ2|E9PFZ2_HUMAN;P00450|CERU_HUMAN			FALSE
LIYAASSLQSGVPSR	60.14	1547.83	15	1.2	774.924	2	19.4674	404000	4270000	3848	20210614_HS_50ng_F3-2.raw	3				FALSE
LKC(+57.02)DEWSVNSVGK	55.92	1520.73	13	-3.3	761.369	2	16.3542	704000	5890000	3564	20210614_HS_50ng_F2-3.raw	3	P02787|TRFE_HUMAN	Carbamidomethylation	C3:Carbamidomethylation:1000.00	FALSE
LLATLC(+57.02)SAEVC(+57.02)QC(+57.02)AEGK	58.87	1908.87	17	-0.6	955.444	2	19.0469	269000	3190000	4023	20210614_HS_50ng_F3-1.raw	3	A0A140TA32|A0A140TA32_HUMAN;A0A140TA29|A0A140TA29_HUMAN;P0C0L4|CO4A_HUMAN;P0C0L5|CO4B_HUMAN;A0A0G2JPR0|A0A0G2JPR0_HUMAN;A0A140TA49|A0A140TA49_HUMAN;F5GXS0|F5GXS0_HUMAN;A0A140TA44|A0A140TA44_HUMAN;A0A3B3ISA6|A0A3B3ISA6_HUMAN;A0A0G2JL54|A0A0G2JL54_HUMAN	Carbamidomethylation; Carbamidomethylation; Carbamidomethylation	C6:Carbamidomethylation:1000.00;C11:Carbamidomethylation:1000.00;C13:Carbamidomethylation:1000.00	FALSE
LLDNWDSVTSTFSK	72.56	1611.78	14	3.4	806.899	2	23.4159	9620000	77500000	4800	20210614_HS_50ng_F4-3.raw	19	F8W696|F8W696_HUMAN;P02647|APOA1_HUMAN			FALSE
LLDSLPSDTR	49.09	1115.58	10	1	558.799	2	15.978	12200000	71400000	3423	20210614_HS_50ng_F2-3.raw	11	H9KV48|H9KV48_HUMAN;P05155|IC1_HUMAN;E9PGN7|E9PGN7_HUMAN			FALSE
LLEGEDAHLSSSQFSSGSQSSR	47.83	2308.06	22	2.1	770.361	3	17.5732			3865	20210614_HS_50ng_F2-2.raw	2	P02533|K1C14_HUMAN			FALSE
LLGEVDHYQLALGK	55.24	1554.84	14	0.5	519.288	3	21.8672	424000	5160000	5215	20210614_HS_50ng_F2-2.raw	3	O75636|FCN3_HUMAN			FALSE
LLIGTVFHK	37.61	1026.62	9	-0.2	514.318	2	20.0918	227000	1930000	4329	20210614_HS_50ng_F1-1.raw	3	P27169|PON1_HUMAN			FALSE
LLIYAVLPTGDVIGDSAK	47.5	1844.03	18	0.3	923.022	2	27.1441	46600	539000	6558	20210614_HS_50ng_F3-1.raw	1	P01023|A2MG_HUMAN			FALSE
LLIYDASNLETGVPSR	61.92	1746.92	16	1.8	874.466	2	22.3155	790000	7370000	4972	20210614_HS_50ng_F3-3.raw	4	A0A2Q2TTZ9|A0A2Q2TTZ9_HUMAN			FALSE
LLIYDASNR	53.36	1063.57	9	-0.4	532.79	2	15.7195	6540000	25700000	3286	20210614_HS_50ng_F2-2.raw	5				FALSE
LLIYDASSR	40.7	1036.56	9	0.9	519.285	2	16.1533	1440000	6640000	3483	20210614_HS_50ng_F2-3.raw	4				FALSE
LLIYDNNK	35.94	991.534	8	-1.8	496.773	2	13.5045	251000	897000	2752	20210614_HS_50ng_F2-3.raw	2				FALSE
LLIYGASSR	35.2	978.55	9	-0.2	490.282	2	13.6668	5500000	16700000	3101	20210614_HS_50ng_F2-1.raw	3	P01619|KV320_HUMAN			FALSE
LLIYGASTR	38.92	992.565	9	-2.8	497.289	2	14.7682	8420000	68400000	3347	20210614_HS_50ng_F2-1.raw	7				FALSE
LLIYWASTR	45.14	1121.62	9	4.9	561.822	2	23.3408	479000	3540000	5675	20210614_HS_50ng_F2-2.raw	2				FALSE
LLLQQVSLPELPGEYSM(+15.99)K	55.55	2060.09	18	-1.5	687.702	3	26.6128	863000	7360000	6140	20210614_HS_50ng_F3-3.raw	6	P01023|A2MG_HUMAN	Oxidation (M)		FALSE
LLQDEFPGIPSPLDAAVEC(+57.02)HR	58.94	2363.16	21	2.5	788.729	3	27.1122	15400000	148000000	5711	20210614_HS_50ng_F3-2.raw	10	P02790|HEMO_HUMAN;Q9BS19|Q9BS19_HUMAN	Carbamidomethylation	C19:Carbamidomethylation:1000.00	FALSE
LLSGGNTLHLVSTTK	60.22	1539.86	15	-0.6	514.294	3	18.6013	2480000	22400000	4572	20210614_HS_50ng_F2-1.raw	4	P04114|APOB_HUMAN			FALSE
LLVVYPWTQR	29.24	1273.72	10	-1.3	637.866	2	24.7472	246000	1770000	6036	20210614_HS_50ng_F2-2.raw	1	F8W6P5|F8W6P5_HUMAN;E9PFT6|E9PFT6_HUMAN;P02042|HBD_HUMAN;P68871|HBB_HUMAN;A0A2R8Y7R2|A0A2R8Y7R2_HUMAN;E9PEW8|E9PEW8_HUMAN			FALSE
LM(+15.99)NIFLK	42.84	893.505	7	-1.8	447.759	2	19.2089	6260000	24000000	4813	20210614_HS_50ng_F2-1.raw	9	P01024|CO3_HUMAN	Oxidation (M)		FALSE
LM(+15.99)QC(+57.02)LPNPEDVK	56.28	1458.68	12	3.3	730.352	2	17.7439	310000	2790000	3406	20210614_HS_50ng_F3-2.raw	3	P04003|C4BPA_HUMAN	Oxidation (M); Carbamidomethylation	C4:Carbamidomethylation:1000.00	FALSE
LN(+0.98)GEIQALELPQK	59.48	1452.78	13	2	727.4	2	20.878	336000	3030000	4091	20210614_HS_50ng_F4-3.raw	3	P04114|APOB_HUMAN	Deamidation (NQ)	N2:Deamidation (NQ):19.86	FALSE
LN(+0.98)M(+15.99)GITDLQGLR	38.32	1346.69	12	-1.8	674.349	2	20.3409	89400	905000	4096	20210614_HS_50ng_F3-2.raw	2	A0A140TA32|A0A140TA32_HUMAN;A0A140TA29|A0A140TA29_HUMAN;P0C0L4|CO4A_HUMAN;P0C0L5|CO4B_HUMAN;A0A0G2JPR0|A0A0G2JPR0_HUMAN;A0A140TA49|A0A140TA49_HUMAN;F5GXS0|F5GXS0_HUMAN;A0A140TA44|A0A140TA44_HUMAN;A0A0G2JL54|A0A0G2JL54_HUMAN	Deamidation (NQ); Oxidation (M)	N2:Deamidation (NQ):83.89;M3:Oxidation (M):1000.00	FALSE
LNDLEDALQQAK	70.83	1356.69	12	-9.8	679.345	2	18.9469	3180000	39600000	3865	20210614_HS_50ng_F3-3.raw	6	#CONTAM#cont|000132|;#CONTAM#cont|000135|;#CONTAM#cont|000134|;P04264|K2C1_HUMAN			FALSE
LNGEIQALELPQK	68.79	1451.8	13	0.6	726.907	2	20.4572	329000	3640000	4346	20210614_HS_50ng_F3-3.raw	3	P04114|APOB_HUMAN			FALSE
LNM(+15.99)GITDLQGLR	64.61	1345.7	12	-1.9	673.857	2	19.2432	7090000	78000000	4078	20210614_HS_50ng_F3-1.raw	12	A0A140TA32|A0A140TA32_HUMAN;A0A140TA29|A0A140TA29_HUMAN;P0C0L4|CO4A_HUMAN;P0C0L5|CO4B_HUMAN;A0A0G2JPR0|A0A0G2JPR0_HUMAN;A0A140TA49|A0A140TA49_HUMAN;F5GXS0|F5GXS0_HUMAN;A0A140TA44|A0A140TA44_HUMAN;A0A0G2JL54|A0A0G2JL54_HUMAN	Oxidation (M)		FALSE
LPDATPTELAK	59.58	1154.62	11	3	578.318	2	14.1465	5440000	25600000	3172	20210614_HS_50ng_F2-1.raw	7	P02774|VTDB_HUMAN;D6RF35|D6RF35_HUMAN			FALSE
LPEC(+57.02)EADDGC(+57.02)PKPPEIAHGYVEHSVR	64.52	2961.34	26	5.7	741.344	4	18.896	680000	5020000	3643	20210614_HS_50ng_F1-2.raw	3	P00738|HPT_HUMAN;J3QLC9|J3QLC9_HUMAN;H0Y300|H0Y300_HUMAN;J3KRH2|J3KRH2_HUMAN;J3QR68|J3QR68_HUMAN	Carbamidomethylation; Carbamidomethylation	C4:Carbamidomethylation:1000.00;C10:Carbamidomethylation:1000.00	FALSE
LPGIVAEGR	49.77	910.524	9	-3	456.268	2	13.5868	5350000	32900000	2756	20210614_HS_50ng_F2-2.raw	10	P01008|ANT3_HUMAN			FALSE
LPLEYSYGEYR	55.57	1388.66	11	-6.7	695.333	2	19.3233	122000	1490000	4122	20210614_HS_50ng_F3-1.raw	6	F5GY80|F5GY80_HUMAN;P07358|CO8B_HUMAN;F5H7G1|F5H7G1_HUMAN			FALSE
LPPNVVEESAR	65.01	1209.64	11	-3.3	605.823	2	12.5188	66800000	335000000	2574	20210614_HS_50ng_F2-2.raw	35	P01023|A2MG_HUMAN			FALSE
LPQQANDYLNSFNWER	62.59	1993.93	16	1.8	997.973	2	23.8096	671000	5080000	5659	20210614_HS_50ng_F3-1.raw	3	P04114|APOB_HUMAN			FALSE
LPTDSELAPR	49.31	1097.57	10	2.4	549.794	2	14.0215	356000	1550000	2864	20210614_HS_50ng_F2-3.raw	2	A0A182DWH7|A0A182DWH7_HUMAN;P49908|SEPP1_HUMAN			FALSE
LPYSVVR	40.7	832.481	7	-0.6	417.247	2	14.374	9090000	47200000	2952	20210614_HS_50ng_F2-3.raw	14	P01024|CO3_HUMAN			FALSE
LPYTIITTPPLK	54.69	1355.81	12	0.6	678.911	2	24.2394	535000	4170000	5159	20210614_HS_50ng_F3-2.raw	1	P04114|APOB_HUMAN			FALSE
LQAILGVPWK	43.9	1123.68	10	3.1	562.847	2	24.1068	498000	4120000	6533	20210614_HS_50ng_F2-1.raw	3	P01019|ANGT_HUMAN			FALSE
LQDED(+21.98)LGFL	44.37	1070.49	9	-0.6	536.252	2	22.6191	325000	2180000	5117	20210614_HS_50ng_F4-1.raw	2	H7C5H1|H7C5H1_HUMAN;E7ETN3|E7ETN3_HUMAN;P00751|CFAB_HUMAN;B4E1Z4|B4E1Z4_HUMAN	Sodium adduct	D5:Sodium adduct:21.87	FALSE
LQDEDLGFL	35.65	1048.51	9	-0.9	525.261	2	23.244	315000	2760000	4317	20210614_HS_50ng_F4-2.raw	2	H7C5H1|H7C5H1_HUMAN;E7ETN3|E7ETN3_HUMAN;P00751|CFAB_HUMAN;B4E1Z4|B4E1Z4_HUMAN			FALSE
LQDFSDQLSDYYEK	60.71	1749.77	14	2.8	875.896	2	20.7348	648000	6130000	4440	20210614_HS_50ng_F3-3.raw	4	P04114|APOB_HUMAN			FALSE
LQGTLPVEAR	51.69	1082.61	10	-0.2	542.311	2	15.0363	1430000	5590000	3140	20210614_HS_50ng_F2-3.raw	3	P01031|CO5_HUMAN			FALSE
LQHLEN(+0.98)ELTHDIITK	57.46	1803.94	15	0.6	602.32	3	18.9998	760000	8210000	4018	20210614_HS_50ng_F1-1.raw	5		Deamidation (NQ)	N6:Deamidation (NQ):18.33	FALSE
LQHLENELTHDIITK	76.45	1802.95	15	-3.8	601.989	3	19.5419	53900000	782000000	4344	20210614_HS_50ng_F1-1.raw	41				FALSE
LQPLDFK	44.15	859.48	7	-2.3	430.747	2	17.7456	3380000	20600000	3885	20210614_HS_50ng_F2-2.raw	6	P01008|ANT3_HUMAN			FALSE
LQPLDFKENAEQSR	45.92	1673.84	14	-2.1	558.952	3	17.5086			3846	20210614_HS_50ng_F2-2.raw	2	P01008|ANT3_HUMAN			FALSE
LQSLFDSPDFSK	55.65	1382.67	12	0.5	692.343	2	21.5369	226000	3200000	4719	20210614_HS_50ng_F3-3.raw	2	P36955|PEDF_HUMAN			FALSE
LRTEGDGVYTLNNEK	54.03	1707.84	15	2.2	570.289	3	14.7233	970000	7480000	3060	20210614_HS_50ng_F2-3.raw	4	P00738|HPT_HUMAN;H3BMJ7|H3BMJ7_HUMAN;J3QLC9|J3QLC9_HUMAN;H3BS21|H3BS21_HUMAN;J3KSV1|J3KSV1_HUMAN;J3QQI8|J3QQI8_HUMAN;J3KRH2|J3KRH2_HUMAN			FALSE
LSFYYLIM(+15.99)AK	45.7	1263.66	10	-2.1	632.835	2	25.9976	425000	5210000	6274	20210614_HS_50ng_F2-2.raw	4	H0YFH1|H0YFH1_HUMAN;P01023|A2MG_HUMAN	Oxidation (M)		FALSE
LSINTHPSQKPLSITVR	74.87	1890.07	17	-3.1	473.523	4	19.4705	8170000	108000000	3939	20210614_HS_50ng_F1-3b.raw	11	P01024|CO3_HUMAN			FALSE
LSITGTYDLK	48.54	1109.6	10	-2.9	555.804	2	18.6182	73400000	493000000	4559	20210614_HS_50ng_F2-1.raw	32				FALSE
LSLEIEQLELQR	55.76	1469.81	12	-2.6	735.91	2	23.8096	1600000	18800000	5647	20210614_HS_50ng_F3-1.raw	6	P04003|C4BPA_HUMAN			FALSE
LSM(+15.99)DIDVSYK	43.73	1185.56	10	0.2	593.787	2	15.9492	248000	1760000	3424	20210614_HS_50ng_F2-3.raw	2	P01031|CO5_HUMAN	Oxidation (M)		FALSE
LSNNALSGLPQGVFGK	63.39	1600.86	16	4.3	801.439	2	22.7265	429000	4060000	5280	20210614_HS_50ng_F3-1.raw	3	P22792|CPN2_HUMAN			FALSE
LSNVLQQVK	45.81	1027.6	9	0.5	514.809	2	14.0605	1940000	11600000	3275	20210614_HS_50ng_F2-1.raw	5	P04114|APOB_HUMAN			FALSE
LSPIYNLVPVK	56.73	1241.74	11	2	621.878	2	23.3712	1720000	16800000	6284	20210614_HS_50ng_F2-1.raw	6	P02748|CO9_HUMAN			FALSE
LSSGLVTAALYGR	42.28	1306.72	13	2.2	654.371	2	21.5153	33700	670000	4702	20210614_HS_50ng_F3-3.raw	1	P43251|BTD_HUMAN			FALSE
LSSPATLN(+0.98)SR	47.68	1045.54	10	0.2	523.778	2	7.1266	306000	1160000	1308	20210614_HS_50ng_F3-3.raw	2	#CONTAM#cont|000142|;#CONTAM#cont|000023|;#CONTAM#cont|000143|;#CONTAM#cont|000141|;#CONTAM#cont|000040|;#CONTAM#cont|000032|	Deamidation (NQ)		FALSE
LSSPATLNSR	51.92	1044.56	10	2.9	523.287	2	5.9817	19400000	67900000	1249	20210614_HS_50ng_F2-1.raw	25	#CONTAM#cont|000142|;#CONTAM#cont|000023|;#CONTAM#cont|000143|;#CONTAM#cont|000141|;#CONTAM#cont|000040|;#CONTAM#cont|000032|			FALSE
LSSPAVITDK	48.54	1029.57	10	-1.1	515.792	2	7.8398	3690000	9620000	1765	20210614_HS_50ng_F2-1.raw	4	P00747|PLMN_HUMAN			FALSE
LSSVTAADTAVYYC(+57.02)AR	67.99	1746.82	16	0.4	874.42	2	18.5364	1160000	11200000	3870	20210614_HS_50ng_F3-1.raw	5		Carbamidomethylation	C14:Carbamidomethylation:1000.00	FALSE
LSSWVLLM(+15.99)K	51.56	1091.6	9	0.8	546.81	2	22.3664	13000000	95300000	5379	20210614_HS_50ng_F2-2.raw	5		Oxidation (M)		FALSE
LSSWVLLMK	34.94	1075.61	9	3.6	538.814	2	24.6061	72100	814000	6692	20210614_HS_50ng_F2-1.raw	2				FALSE
LSYTC(+57.02)EGGFR	46.69	1188.52	10	0	595.269	2	12.9726	2210000	10300000	2859	20210614_HS_50ng_F2-1.raw	5	P08603|CFAH_HUMAN	Carbamidomethylation	C5:Carbamidomethylation:1000.00	FALSE
LTGSSGFVTDGPGNYK	48.83	1598.76	16	0.9	800.387	2	17.2564	275000	2290000	3282	20210614_HS_50ng_F3-2.raw	3	O75882|ATRN_HUMAN			FALSE
LTISEQNIQR	60.54	1200.65	10	-1.1	601.33	2	14.4601	5780000	43700000	2988	20210614_HS_50ng_F2-2.raw	9	A8MUN2|A8MUN2_HUMAN;P04114|APOB_HUMAN			FALSE
LTLDIQNK	42.75	943.534	8	-0.4	472.774	2	14.0011	2200000	9420000	3153	20210614_HS_50ng_F2-1.raw	3	P04114|APOB_HUMAN			FALSE
LTLTPWVGLR	45.82	1154.68	10	4	578.35	2	25.4502	99400	995000	6564	20210614_HS_50ng_F2-3.raw	2	O75882|ATRN_HUMAN			FALSE
LTPLYELVK	45.27	1074.63	9	4	538.326	2	23.1856	389000	3240000	5630	20210614_HS_50ng_F2-2.raw	3	P10643|CO7_HUMAN			FALSE
LTPYADEFK	48.03	1082.53	9	0	542.271	2	16.5415	200000	1560000	3637	20210614_HS_50ng_F2-3.raw	1	P06727|APOA4_HUMAN			FALSE
LVAASQAALGL	60.4	1012.59	11	1.6	507.304	2	27.3796	342000000	2670000000	5648	20210614_HS_50ng_F4-3.raw	65	A0A087WWT3|A0A087WWT3_HUMAN;P02768|ALBU_HUMAN;C9JKR2|C9JKR2_HUMAN;D6RHD5|D6RHD5_HUMAN;B7WNR0|B7WNR0_HUMAN;H0YA55|H0YA55_HUMAN			FALSE
LVAASQAALGL(+21.98)	44.33	1034.57	11	-2.1	518.293	2	20.0997	127000000	728000000	3874	20210614_HS_50ng_F4-3.raw	24	A0A087WWT3|A0A087WWT3_HUMAN;P02768|ALBU_HUMAN;C9JKR2|C9JKR2_HUMAN;D6RHD5|D6RHD5_HUMAN;B7WNR0|B7WNR0_HUMAN;H0YA55|H0YA55_HUMAN	Sodium adduct		FALSE
LVAYYTLIGASGQR	58.41	1510.81	14	3	756.417	2	22.4055	4350000	34000000	5668	20210614_HS_50ng_F2-3.raw	5	P01024|CO3_HUMAN			FALSE
LVDKFLEDVK	51.44	1204.67	10	0.4	603.343	2	18.9932	765000	6180000	3996	20210614_HS_50ng_F1-1.raw	3				FALSE
LVDKFLEDVKK	54.94	1332.77	11	-1.2	445.262	3	17.8435	526000	4150000	3691	20210614_HS_50ng_F1-1.raw	3				FALSE
LVGITSWGEGC(+57.02)AR	34.86	1404.68	13	0.7	703.349	2	20.1299	33600	603000	4258	20210614_HS_50ng_F3-3.raw	1	H0YAC1|H0YAC1_HUMAN;P03952|KLKB1_HUMAN	Carbamidomethylation	C11:Carbamidomethylation:1000.00	FALSE
LVHVEEPHTETVR	73.01	1544.79	13	-1.2	515.938	3	11.1505	5880000	21100000	2073	20210614_HS_50ng_F1-3b.raw	8	P01023|A2MG_HUMAN			FALSE
LVN(+0.98)EVTEFAK	58.45	1149.59	10	-2.8	575.802	2	16.7961	46000000	243000000	3242	20210614_HS_50ng_F3-3.raw	12	A0A0C4DGB6|A0A0C4DGB6_HUMAN;A0A087WWT3|A0A087WWT3_HUMAN;P02768|ALBU_HUMAN;H7C013|H7C013_HUMAN	Deamidation (NQ)		FALSE
LVNELTEFAK	51.83	1162.62	10	-1.6	582.318	2	16.5226	15000000	113000000	4091	20210614_HS_50ng_F2-1.raw	9	#CONTAM#cont|000097|;#CONTAM#cont|000035|;#CONTAM#cont|000017|			FALSE
LVNEVTE(+21.98)FAK	59.86	1170.59	10	-2.5	586.301	2	16.6482	42100000	210000000	4104	20210614_HS_50ng_F2-1.raw	11	A0A0C4DGB6|A0A0C4DGB6_HUMAN;A0A087WWT3|A0A087WWT3_HUMAN;P02768|ALBU_HUMAN;H7C013|H7C013_HUMAN	Sodium adduct	E7:Sodium adduct:27.77	FALSE
LVNEVTEFAK	68.33	1148.61	10	-8.8	575.306	2	17.4041	455000000	1580000000	3819	20210614_HS_50ng_F2-2.raw	178	A0A0C4DGB6|A0A0C4DGB6_HUMAN;A0A087WWT3|A0A087WWT3_HUMAN;P02768|ALBU_HUMAN;H7C013|H7C013_HUMAN			FALSE
LVPFATELHER	45.74	1310.7	11	-2.4	437.906	3	19.4104	28100	414000	4141	20210614_HS_50ng_F1-1.raw	1	P06727|APOA4_HUMAN			FALSE
LVRPE(+21.98)VD(+21.98)VMC(+57.02)TAFHDNEETFLK	59.91	2693.22	22	8.7	898.755	3	24.5392	12100000	115000000	6716	20210614_HS_50ng_F2-1.raw	2	A0A0C4DGB6|A0A0C4DGB6_HUMAN;A0A087WWT3|A0A087WWT3_HUMAN;P02768|ALBU_HUMAN;H7C013|H7C013_HUMAN	Sodium adduct; Sodium adduct; Carbamidomethylation	E5:Sodium adduct:47.07;D7:Sodium adduct:53.45;C10:Carbamidomethylation:1000.00	FALSE
LVRPE(+21.98)VD(+21.98)VMC(+57.02)TAFHDNEETFLKK	40.16	2821.32	23	1.7	706.337	4	23.3856	1110000	11900000	5169	20210614_HS_50ng_F1-1.raw	5	A0A0C4DGB6|A0A0C4DGB6_HUMAN;A0A087WWT3|A0A087WWT3_HUMAN;P02768|ALBU_HUMAN;H7C013|H7C013_HUMAN	Sodium adduct; Sodium adduct; Carbamidomethylation	E5:Sodium adduct:36.31;D7:Sodium adduct:47.82;C10:Carbamidomethylation:1000.00	FALSE
LVRPEVD(+21.98)VM(+15.99)C(+57.02)TAFHDNEETFLK	55.58	2687.23	22	9	672.822	4	22.5321	257000	3360000	5745	20210614_HS_50ng_F2-3.raw	2	A0A0C4DGB6|A0A0C4DGB6_HUMAN;A0A087WWT3|A0A087WWT3_HUMAN;P02768|ALBU_HUMAN;H7C013|H7C013_HUMAN	Sodium adduct; Oxidation (M); Carbamidomethylation	D7:Sodium adduct:18.95;M9:Oxidation (M):1000.00;C10:Carbamidomethylation:1000.00	FALSE
LVRPEVDVM(+15.99)C(+57.02)TAFHD(+21.98)N(+0.98)EETFLK	40.43	2688.22	22	4.3	897.084	3	22.9741	863000	6410000	6179	20210614_HS_50ng_F2-1.raw	2	A0A0C4DGB6|A0A0C4DGB6_HUMAN;A0A087WWT3|A0A087WWT3_HUMAN;P02768|ALBU_HUMAN;H7C013|H7C013_HUMAN	Oxidation (M); Carbamidomethylation; Sodium adduct; Deamidation (NQ)	M9:Oxidation (M):1000.00;C10:Carbamidomethylation:1000.00;D15:Sodium adduct:0.00;N16:Deamidation (NQ):1000.00	FALSE
LVRPEVDVM(+15.99)C(+57.02)TAFHD(+21.98)NEETFLK	54.23	2687.23	22	2.1	896.754	3	22.1382	6920000	26300000	5846	20210614_HS_50ng_F2-1.raw	4	A0A0C4DGB6|A0A0C4DGB6_HUMAN;A0A087WWT3|A0A087WWT3_HUMAN;P02768|ALBU_HUMAN;H7C013|H7C013_HUMAN	Oxidation (M); Carbamidomethylation; Sodium adduct	M9:Oxidation (M):1000.00;C10:Carbamidomethylation:1000.00;D15:Sodium adduct:6.59	FALSE
LVRPEVDVM(+15.99)C(+57.02)TAFHDN(+0.98)EETFLK	55.25	2666.24	22	6.6	667.571	4	30.4879	98900000	1160000000	6914	20210614_HS_50ng_F2-2.raw	22	A0A0C4DGB6|A0A0C4DGB6_HUMAN;A0A087WWT3|A0A087WWT3_HUMAN;P02768|ALBU_HUMAN;H7C013|H7C013_HUMAN	Oxidation (M); Carbamidomethylation; Deamidation (NQ)	C10:Carbamidomethylation:1000.00	FALSE
LVRPEVDVM(+15.99)C(+57.02)TAFHDN(+0.98)EETFLKK	43.91	2794.33	23	7.4	559.878	5	23.7849	12900000	41900000	4973	20210614_HS_50ng_F1-1.raw	6	A0A0C4DGB6|A0A0C4DGB6_HUMAN;A0A087WWT3|A0A087WWT3_HUMAN;P02768|ALBU_HUMAN;H7C013|H7C013_HUMAN	Oxidation (M); Carbamidomethylation; Deamidation (NQ)	C10:Carbamidomethylation:1000.00	FALSE
LVRPEVDVM(+15.99)C(+57.02)TAFHDNE(+21.98)ETFLK	43.52	2687.23	22	1.7	896.753	3	22.4706	767000	5300000	5689	20210614_HS_50ng_F2-3.raw	2	A0A0C4DGB6|A0A0C4DGB6_HUMAN;A0A087WWT3|A0A087WWT3_HUMAN;P02768|ALBU_HUMAN;H7C013|H7C013_HUMAN	Oxidation (M); Carbamidomethylation; Sodium adduct	M9:Oxidation (M):1000.00;C10:Carbamidomethylation:1000.00;E17:Sodium adduct:0.00	FALSE
LVRPEVDVM(+15.99)C(+57.02)TAFHDNEETFLK	89.18	2665.25	22	-1.3	667.319	4	26.6395	171000000	1170000000	6252	20210614_HS_50ng_F2-2.raw	135	A0A0C4DGB6|A0A0C4DGB6_HUMAN;A0A087WWT3|A0A087WWT3_HUMAN;P02768|ALBU_HUMAN;H7C013|H7C013_HUMAN	Oxidation (M); Carbamidomethylation	C10:Carbamidomethylation:1000.00	FALSE
LVRPEVDVM(+15.99)C(+57.02)TAFHDNEETFLKK	103.37	2793.35	23	-7.7	699.339	4	21.2442	34100000	227000000	4617	20210614_HS_50ng_F1-1.raw	43	A0A0C4DGB6|A0A0C4DGB6_HUMAN;A0A087WWT3|A0A087WWT3_HUMAN;P02768|ALBU_HUMAN;H7C013|H7C013_HUMAN	Oxidation (M); Carbamidomethylation	C10:Carbamidomethylation:1000.00	FALSE
LVRPEVDVMC(+57.02)TAFHDN(+0.98)EETFLK	26.9	2650.24	22	-5.6	884.416	3	22.1218	121000	1520000	5870	20210614_HS_50ng_F2-1.raw	1	A0A0C4DGB6|A0A0C4DGB6_HUMAN;A0A087WWT3|A0A087WWT3_HUMAN;P02768|ALBU_HUMAN;H7C013|H7C013_HUMAN	Carbamidomethylation; Deamidation (NQ)	C10:Carbamidomethylation:1000.00	FALSE
LVRPEVDVMC(+57.02)TAFHDNEETFLK	76.13	2649.26	22	2.3	663.323	4	25.2617	7990000	85800000	6115	20210614_HS_50ng_F2-2.raw	11	A0A0C4DGB6|A0A0C4DGB6_HUMAN;A0A087WWT3|A0A087WWT3_HUMAN;P02768|ALBU_HUMAN;H7C013|H7C013_HUMAN	Carbamidomethylation	C10:Carbamidomethylation:1000.00	FALSE
LVRPEVDVMC(+57.02)TAFHDNEETFLKK	27.44	2777.35	23	6.6	556.481	5	23.5727	40300	524000	5217	20210614_HS_50ng_F1-1.raw	1	A0A0C4DGB6|A0A0C4DGB6_HUMAN;A0A087WWT3|A0A087WWT3_HUMAN;P02768|ALBU_HUMAN;H7C013|H7C013_HUMAN	Carbamidomethylation	C10:Carbamidomethylation:1000.00	FALSE
LWWLDLK	39.64	972.543	7	-0.5	487.279	2	26.9434	1390000	6380000	7386	20210614_HS_50ng_F2-1.raw	3	P02790|HEMO_HUMAN			FALSE
LYGSEAFATDFQDSAAAK	65.9	1890.86	18	-0.1	946.439	2	21.037	2660000	28700000	4120	20210614_HS_50ng_F4-3.raw	8	G3V595|G3V595_HUMAN;P01011|AACT_HUMAN			FALSE
LYHSEAFTVN(+0.98)FGDTEEAK	51.49	2057.92	18	3.9	686.984	3	20.6905	232000	2820000	5068	20210614_HS_50ng_F2-3.raw	3		Deamidation (NQ)		FALSE
LYHSEAFTVNFGDTEEAK	71.03	2056.94	18	-7.3	686.648	3	21.4961	12300000	62400000	5095	20210614_HS_50ng_F2-2.raw	21				FALSE
LYHSEAFTVNFGDTEEAKK	82.19	2185.03	19	1.5	547.266	4	20.0348	8960000	46000000	4303	20210614_HS_50ng_F1-1.raw	8				FALSE
M(+15.99)C(+57.02)PQLQQYEM(+15.99)HGPEGLR	62.07	2104.91	17	-1.1	702.644	3	17.7452	7130000	47800000	4032	20210614_HS_50ng_F2-3.raw	7	P01023|A2MG_HUMAN	Oxidation (M); Carbamidomethylation; Oxidation (M)	C2:Carbamidomethylation:1000.00	FALSE
M(+15.99)EEVE(+21.98)AM(+15.99)LLPETLK	34.93	1685.79	14	3.2	562.938	3	21.433	239000	1700000	4825	20210614_HS_50ng_F3-1.raw	2	G3V595|G3V595_HUMAN;G3V3A0|G3V3A0_HUMAN;A0A087WY93|A0A087WY93_HUMAN;P01011|AACT_HUMAN	Oxidation (M); Sodium adduct; Oxidation (M)	M1:Oxidation (M):1000.00;E5:Sodium adduct:4.52;M7:Oxidation (M):1000.00	FALSE
M(+15.99)EEVEAM(+15.99)LLPETLK	73.64	1663.8	14	2.6	832.912	2	22.0821	11700000	95300000	4052	20210614_HS_50ng_F4-2.raw	11	G3V595|G3V595_HUMAN;G3V3A0|G3V3A0_HUMAN;A0A087WY93|A0A087WY93_HUMAN;P01011|AACT_HUMAN	Oxidation (M); Oxidation (M)		FALSE
M(+15.99)EEVEAM(+15.99)LLPETLKR	60.19	1819.91	15	4.4	607.645	3	20.6579	1090000	11400000	5047	20210614_HS_50ng_F2-3.raw	3	G3V595|G3V595_HUMAN;G3V3A0|G3V3A0_HUMAN;A0A087WY93|A0A087WY93_HUMAN;P01011|AACT_HUMAN	Oxidation (M); Oxidation (M)		FALSE
M(+15.99)FLSFPTTK	51.05	1086.54	9	-0.2	544.278	2	20.2607	1250000	8400000	5178	20210614_HS_50ng_F2-1.raw	2	P69905|HBA_HUMAN;G3V1N2|G3V1N2_HUMAN;A0A2R8Y7C0|A0A2R8Y7C0_HUMAN	Oxidation (M)		FALSE
M(+15.99)FTTAPDQVDKEDEDFQESNK	71.02	2489.05	21	2.5	830.694	3	17.0427	6380000	53500000	3766	20210614_HS_50ng_F2-3.raw	6	E9PFZ2|E9PFZ2_HUMAN;H7C5R1|H7C5R1_HUMAN;P00450|CERU_HUMAN	Oxidation (M)		FALSE
M(+15.99)GLAFESTK	38.12	998.474	9	-2.1	500.243	2	11.7862	2090000	2870000	2309	20210614_HS_50ng_F2-3.raw	2	A8MUN2|A8MUN2_HUMAN;P04114|APOB_HUMAN	Oxidation (M)		FALSE
M(+15.99)NTVIAALSR	54.12	1090.58	10	2.4	546.299	2	17.1069	1610000	7570000	3800	20210614_HS_50ng_F2-3.raw	3	P08185|CBG_HUMAN	Oxidation (M)		FALSE
M(+15.99)PGTVATLR	50.52	960.506	9	-1.2	481.26	2	19.0184	2140000	11400000	3998	20210614_HS_50ng_F4-1.raw	5		Oxidation (M)		FALSE
M(+15.99)RPSTDTITVM(+15.99)VENSHGLR	63.54	2175.04	19	4	544.768	4	18.1575	2330000	14100000	3452	20210614_HS_50ng_F1-2.raw	5	A0A140TA32|A0A140TA32_HUMAN;A0A140TA29|A0A140TA29_HUMAN;P0C0L4|CO4A_HUMAN;P0C0L5|CO4B_HUMAN;A0A0G2JPR0|A0A0G2JPR0_HUMAN;A0A140TA49|A0A140TA49_HUMAN;F5GXS0|F5GXS0_HUMAN;A0A140TA44|A0A140TA44_HUMAN;A0A0G2JL54|A0A0G2JL54_HUMAN	Oxidation (M); Oxidation (M)		FALSE
M(+15.99)SAVEGIC(+57.02)TSESPVIDHQGTK	63.98	2261.03	21	3.1	754.686	3	16.9104	306000	7510000	4005	20210614_HS_50ng_F2-1.raw	4	P01031|CO5_HUMAN	Oxidation (M); Carbamidomethylation	C8:Carbamidomethylation:1000.00	FALSE
M(+15.99)TLDDFR	41.67	912.401	7	-2.2	457.207	2	10.7867	1060000	3150000	2161	20210614_HS_50ng_F2-3.raw	4	K7EQQ3|K7EQQ3_HUMAN;P35527|K1C9_HUMAN	Oxidation (M)		FALSE
M(+15.99)TSNFPVDLSDYPK	63.04	1628.74	14	0.4	815.377	2	21.7971	2420000	19700000	4495	20210614_HS_50ng_F3-2.raw	3	P04114|APOB_HUMAN	Oxidation (M)		FALSE
M(+15.99)VSGFIPLKPTVK	63.57	1431.82	13	4.2	716.918	2	20.6467	10300000	75300000	4257	20210614_HS_50ng_F1-3b.raw	14	P01023|A2MG_HUMAN;P20742|PZP_HUMAN	Oxidation (M)		FALSE
M(+15.99)YLGYEYVTAIR	68.27	1493.72	12	2	747.87	2	21.9663	20100000	182000000	4863	20210614_HS_50ng_F3-3.raw	42	P02787|TRFE_HUMAN	Oxidation (M)		FALSE
M(+15.99)YQM(+15.99)DIQQELQR	51.8	1613.72	12	1.1	538.914	3	16.5113	907000	4630000	3175	20210614_HS_50ng_F3-3.raw	4	P04114|APOB_HUMAN	Oxidation (M); Oxidation (M)		FALSE
M(+15.99)YYSAVDPTK	59.95	1189.53	10	-0.5	595.773	2	9.9417	601000	2150000	1957	20210614_HS_50ng_F2-3.raw	2	P00450|CERU_HUMAN	Oxidation (M)		FALSE
MPGTVATLR	44.89	944.511	9	0	473.263	2	12.1501	15600000	34500000	2704	20210614_HS_50ng_F2-1.raw	29				FALSE
MYLGYEYVTAIR	53.89	1477.73	12	3.5	739.874	2	23.3241	113000	1480000	5489	20210614_HS_50ng_F3-1.raw	1	P02787|TRFE_HUMAN			FALSE
N(+0.98)EC(+57.02)FLQHK	37.88	1075.48	8	-1	538.745	2	7.595	900000	2560000	1429	20210614_HS_50ng_F2-3.raw	3	A0A0C4DGB6|A0A0C4DGB6_HUMAN;A0A087WWT3|A0A087WWT3_HUMAN;P02768|ALBU_HUMAN;H7C013|H7C013_HUMAN	Deamidation (NQ); Carbamidomethylation	N1:Deamidation (NQ):53.48;C3:Carbamidomethylation:1000.00	FALSE
N(+0.98)EC(+57.02)FLQHKDDNPNLPR	48.92	1996.91	16	1.9	666.644	3	17.1597			3832	20210614_HS_50ng_F2-3.raw	1	A0A0C4DGB6|A0A0C4DGB6_HUMAN;A0A087WWT3|A0A087WWT3_HUMAN;P02768|ALBU_HUMAN;H7C013|H7C013_HUMAN	Deamidation (NQ); Carbamidomethylation	N1:Deamidation (NQ):8.19;C3:Carbamidomethylation:1000.00	FALSE
N(+0.98)EDSLVFVQTDK	66.73	1394.66	12	0.8	698.336	2	18.7692	119000	1270000	3539	20210614_HS_50ng_F4-3.raw	1	P01023|A2MG_HUMAN;F8W7L3|F8W7L3_HUMAN	Deamidation (NQ)	N1:Deamidation (NQ):99.62	FALSE
N(+0.98)FPSPVDAAFR	39.36	1220.58	11	1.7	611.3	2	21.6307	133000	1040000	4306	20210614_HS_50ng_F4-3.raw	1	P02790|HEMO_HUMAN;Q9BS19|Q9BS19_HUMAN	Deamidation (NQ)		FALSE
N(+0.98)GIDIYSLTVDSR	57.35	1452.71	13	-1.9	727.361	2	22.5644	155000	1680000	5101	20210614_HS_50ng_F4-1.raw	2	Q14624|ITIH4_HUMAN;B7ZKJ8|B7ZKJ8_HUMAN	Deamidation (NQ)		FALSE
N(+0.98)GSLFAFR	35.07	911.45	8	1.7	456.733	2	20.8057	13500	201000	4072	20210614_HS_50ng_F4-3.raw	2	P04004|VTNC_HUMAN	Deamidation (NQ)		FALSE
N(+0.98)GVAQEPVHLDSPAIK	68.19	1674.86	16	1.9	838.438	2	18.4287	6930000	78500000	3836	20210614_HS_50ng_F3-1.raw	10	P04217|A1BG_HUMAN;M0R009|M0R009_HUMAN	Deamidation (NQ)	N1:Deamidation (NQ):25.70	FALSE
N(+0.98)PNLPPETVDSLK	39.72	1423.72	13	0.9	712.868	2	18.5922	34400	715000	3626	20210614_HS_50ng_F3-2.raw	1	P05090|APOD_HUMAN;C9JF17|C9JF17_HUMAN	Deamidation (NQ)	N1:Deamidation (NQ):0.00	FALSE
N(+0.98)QVSLTC(+57.02)LVK	55.85	1161.61	10	-0.7	581.81	2	19.9846	1930000	20800000	3832	20210614_HS_50ng_F4-3.raw	3	P01859|IGHG2_HUMAN;A0A4W9A917|A0A4W9A917_HUMAN;P01857|IGHG1_HUMAN;P01860|IGHG3_HUMAN;A0A286YEY4|A0A286YEY4_HUMAN;A0A0A0MS08|A0A0A0MS08_HUMAN;A0A0A0MS07|A0A0A0MS07_HUMAN;A0A286YES1|A0A286YES1_HUMAN	Deamidation (NQ); Carbamidomethylation	N1:Deamidation (NQ):0.00;C7:Carbamidomethylation:1000.00	FALSE
N(+0.98)SLYLQM(+15.99)NSLR	46.39	1354.66	11	-1.2	678.334	2	17.6493	669000	4870000	3466	20210614_HS_50ng_F3-3.raw	4		Deamidation (NQ); Oxidation (M)	N1:Deamidation (NQ):23.70;M7:Oxidation (M):1000.00	FALSE
NALALFVLPK	55.54	1084.66	10	2.6	543.341	2	26.4977	180000	1910000	6420	20210614_HS_50ng_F2-2.raw	3	#CONTAM#cont|000072|;P05543|THBG_HUMAN			FALSE
NALFC(+57.02)LESAWK	45.31	1337.64	11	5.6	669.833	2	25.3786	78900	679000	6162	20210614_HS_50ng_F2-2.raw	1	P01023|A2MG_HUMAN	Carbamidomethylation	C5:Carbamidomethylation:1000.00	FALSE
NDFTWFK	35.66	956.439	7	0.5	479.227	2	21.3887	140000	2980000	5317	20210614_HS_50ng_F2-3.raw	3	P08603|CFAH_HUMAN			FALSE
NEC(+57.02)FLQHK	40.12	1074.49	8	-1.1	538.253	2	6.7379	11500000	21900000	1182	20210614_HS_50ng_F2-3.raw	19	A0A0C4DGB6|A0A0C4DGB6_HUMAN;A0A087WWT3|A0A087WWT3_HUMAN;P02768|ALBU_HUMAN;H7C013|H7C013_HUMAN	Carbamidomethylation	C3:Carbamidomethylation:1000.00	FALSE
NEC(+57.02)FLQHKDDNPNLPR	73.13	1995.92	16	-1.3	666.314	3	16.0041	7810000	55300000	3171	20210614_HS_50ng_F1-1.raw	15	A0A0C4DGB6|A0A0C4DGB6_HUMAN;A0A087WWT3|A0A087WWT3_HUMAN;P02768|ALBU_HUMAN;H7C013|H7C013_HUMAN	Carbamidomethylation	C3:Carbamidomethylation:1000.00	FALSE
NEDSLVFVQTDK	64.66	1393.67	12	1.9	697.845	2	18.5477	9960000	62200000	3260	20210614_HS_50ng_F4-2.raw	15	P01023|A2MG_HUMAN;F8W7L3|F8W7L3_HUMAN			FALSE
NFEITIK	34.95	863.475	7	0.1	432.745	2	18.8732	18200	286000	4274	20210614_HS_50ng_F2-2.raw	1	P01031|CO5_HUMAN			FALSE
NFPSPVDAAFR	64.67	1219.6	11	0.3	610.807	2	20.7056	26700000	171000000	4507	20210614_HS_50ng_F4-1.raw	25	P02790|HEMO_HUMAN;Q9BS19|Q9BS19_HUMAN			FALSE
NGIDIYSLTVDSR	52.47	1451.73	13	0.7	726.871	2	22.292	94000	1370000	4975	20210614_HS_50ng_F3-3.raw	2	Q14624|ITIH4_HUMAN;B7ZKJ8|B7ZKJ8_HUMAN			FALSE
NGVAQEPVHLDSPAIK	59.55	1673.87	16	3.4	558.967	3	18.1553	1490000	14700000	4167	20210614_HS_50ng_F2-3.raw	4	P04217|A1BG_HUMAN;M0R009|M0R009_HUMAN			FALSE
NHM(+15.99)QYEIVIK	46.71	1289.64	10	-0.3	430.887	3	16.6304	886000	1730000	3076	20210614_HS_50ng_F1-2.raw	3	P19827|ITIH1_HUMAN;F8WAS2|F8WAS2_HUMAN	Oxidation (M)		FALSE
NIILPVYDK	58.98	1073.61	9	6	537.817	2	20.7389	2230000	16100000	4879	20210614_HS_50ng_F2-2.raw	4	P04114|APOB_HUMAN			FALSE
NILTSN(+0.98)NIDVK	48.35	1230.65	11	0.6	616.33	2	17.3165	229000	1790000	3388	20210614_HS_50ng_F3-3.raw	2	P05090|APOD_HUMAN;C9JF17|C9JF17_HUMAN	Deamidation (NQ)	N6:Deamidation (NQ):8.69	FALSE
NILTSNNIDVK	54.47	1229.66	11	-2.1	615.837	2	17.3675	3640000	14500000	3895	20210614_HS_50ng_F2-3.raw	7	P05090|APOD_HUMAN;C9JF17|C9JF17_HUMAN			FALSE
NLAVSQVVHK	55.54	1093.62	10	-4	547.816	2	9.2465	5730000	11000000	2005	20210614_HS_50ng_F1-2.raw	13	G3V3A0|G3V3A0_HUMAN;P01011|AACT_HUMAN			FALSE
NLNEKDYELLC(+57.02)LDGTR	67.64	1951.93	16	2.4	651.653	3	21.9883	4270000	48100000	5251	20210614_HS_50ng_F2-2.raw	6	P02787|TRFE_HUMAN	Carbamidomethylation	C11:Carbamidomethylation:1000.00	FALSE
NLQNNAEWVYQGAIR	62.23	1774.88	15	0.4	888.445	2	21.4794	358000	4650000	4684	20210614_HS_50ng_F3-3.raw	3	P04114|APOB_HUMAN			FALSE
NM(+15.99)EQFQVSVSVAPNAK	67.72	1763.85	16	1.2	882.934	2	18.7251	197000	1920000	3927	20210614_HS_50ng_F3-1.raw	2	Q14624|ITIH4_HUMAN;B7ZKJ8|B7ZKJ8_HUMAN	Oxidation (M)		FALSE
NM(+15.99)EVSVATTTK	44.63	1195.58	11	-1.4	598.794	2	6.085	8710	302000	1040	20210614_HS_50ng_F2-3.raw	1	P04114|APOB_HUMAN	Oxidation (M)		FALSE
NN(+0.98)LELSTPLK	38.71	1128.6	10	3.7	565.311	2	18.4696	18900	229000	3453	20210614_HS_50ng_F4-3.raw	1	A0A3B3ISJ1|A0A3B3ISJ1_HUMAN;G5E9F8|G5E9F8_HUMAN;P07225|PROS_HUMAN;A0A0S2Z4L3|A0A0S2Z4L3_HUMAN	Deamidation (NQ)	N2:Deamidation (NQ):0.00	FALSE
NNALDFVTK	54.4	1020.52	9	1.8	511.27	2	17.0892	1480000	8270000	3807	20210614_HS_50ng_F2-3.raw	3	P04114|APOB_HUMAN			FALSE
NNEGTYYSPNYNPQSR	45.51	1902.81	16	-0.5	952.413	2	14.3248	1190000	4940000	2636	20210614_HS_50ng_F3-3.raw	2	E9PFZ2|E9PFZ2_HUMAN;H7C5R1|H7C5R1_HUMAN;P00450|CERU_HUMAN			FALSE
NNLELSTPLK	50.25	1127.62	10	1.6	564.817	2	18.0938	418000	2890000	4033	20210614_HS_50ng_F2-2.raw	3	A0A3B3ISJ1|A0A3B3ISJ1_HUMAN;G5E9F8|G5E9F8_HUMAN;P07225|PROS_HUMAN;A0A0S2Z4L3|A0A0S2Z4L3_HUMAN			FALSE
NPDGDVGGPWC(+57.02)YTTNPR	83.45	1904.81	17	-1	953.412	2	19.5359	630000	4740000	3869	20210614_HS_50ng_F3-2.raw	3	P00747|PLMN_HUMAN	Carbamidomethylation	C11:Carbamidomethylation:1000.00	FALSE
NPLVWVHASPEHVVVTR	69.14	1939.04	17	2.1	485.769	4	21.5969	501000	4850000	4499	20210614_HS_50ng_F1-3b.raw	5	Q14624|ITIH4_HUMAN;B7ZKJ8|B7ZKJ8_HUMAN;H7C0L5|H7C0L5_HUMAN			FALSE
NPN(+0.98)GYSFSIPVK	63.31	1322.65	12	1.5	662.334	2	21.322	1690000	11500000	4358	20210614_HS_50ng_F3-2.raw	4	P04114|APOB_HUMAN	Deamidation (NQ)	N3:Deamidation (NQ):22.85	FALSE
NPN(+0.98)LPPETVDSLK	37.56	1423.72	13	6.3	712.871	2	18.1684	48000	1070000	3635	20210614_HS_50ng_F3-3.raw	1	P05090|APOD_HUMAN;C9JF17|C9JF17_HUMAN	Deamidation (NQ)	N3:Deamidation (NQ):14.04	FALSE
NPNLPPETVDSLK	43.95	1422.74	13	-1.9	712.374	2	17.5884	2010000	10400000	3575	20210614_HS_50ng_F3-1.raw	4	P05090|APOD_HUMAN;C9JF17|C9JF17_HUMAN			FALSE
NQ(+0.98)VSLTC(+57.02)LVK	45.92	1161.61	10	2.7	581.812	2	20.1804	2980000	16700000	4090	20210614_HS_50ng_F3-2.raw	5	P01859|IGHG2_HUMAN;A0A4W9A917|A0A4W9A917_HUMAN;P01857|IGHG1_HUMAN;P01860|IGHG3_HUMAN;A0A286YEY4|A0A286YEY4_HUMAN;A0A0A0MS08|A0A0A0MS08_HUMAN;A0A0A0MS07|A0A0A0MS07_HUMAN;A0A286YES1|A0A286YES1_HUMAN	Deamidation (NQ); Carbamidomethylation	Q2:Deamidation (NQ):0.00;C7:Carbamidomethylation:1000.00	FALSE
NQGNTWLTAFVLK	65.12	1490.79	13	4.8	746.405	2	27.9051	857000	6710000	5857	20210614_HS_50ng_F3-2.raw	5	P01023|A2MG_HUMAN;P20742|PZP_HUMAN			FALSE
NQVSLTC(+57.02)LVK	70.13	1160.62	10	1.2	581.319	2	19.6713	44800000	301000000	3142	20210614_HS_50ng_F5-2.raw	36	P01859|IGHG2_HUMAN;A0A4W9A917|A0A4W9A917_HUMAN;P01857|IGHG1_HUMAN;P01860|IGHG3_HUMAN;A0A286YEY4|A0A286YEY4_HUMAN;A0A0A0MS08|A0A0A0MS08_HUMAN;A0A0A0MS07|A0A0A0MS07_HUMAN;A0A286YES1|A0A286YES1_HUMAN	Carbamidomethylation	C7:Carbamidomethylation:1000.00	FALSE
NSLYLQ(+0.98)M(+15.99)NSLR	35.58	1354.66	11	4.7	678.338	2	16.8792	205000	2170000	3990	20210614_HS_50ng_F2-1.raw	1		Deamidation (NQ); Oxidation (M)	Q6:Deamidation (NQ):20.41;M7:Oxidation (M):1000.00	FALSE
NSLYLQM(+15.99)N(+0.98)SLR	45.37	1354.66	11	0.8	678.335	2	17.5672	868000	6500000	3360	20210614_HS_50ng_F3-2.raw	5		Oxidation (M); Deamidation (NQ)	M7:Oxidation (M):1000.00;N8:Deamidation (NQ):15.21	FALSE
NSLYLQM(+15.99)NSLR	54.69	1353.67	11	1.3	677.844	2	17.2554	2710000	18900000	3755	20210614_HS_50ng_F2-2.raw	4		Oxidation (M)		FALSE
NSLYLQMNSLR	23.67	1337.68	11	2.4	669.847	2	19.5743	101000	1310000	4675	20210614_HS_50ng_F2-3.raw	1				FALSE
NTEILTGSWSDQTYPEGTQAIYK	29.26	2601.22	23	3.1	868.085	3	22.9369	44000	490000	5226	20210614_HS_50ng_F4-1.raw	1	A0A0D9SG88|A0A0D9SG88_HUMAN;P08603|CFAH_HUMAN;Q5TFM2|Q5TFM2_HUMAN			FALSE
NTLELSN(+0.98)GVIVK	51.94	1286.71	12	3.2	644.363	2	19.4253	840000	10600000	4150	20210614_HS_50ng_F3-1.raw	3	P04114|APOB_HUMAN	Deamidation (NQ)	N7:Deamidation (NQ):76.27	FALSE
NTLELSNGVIVK	59.89	1285.72	12	1.6	643.87	2	19.3108	114000	3320000	4601	20210614_HS_50ng_F2-3.raw	2	P04114|APOB_HUMAN			FALSE
NTLYLQM(+15.99)N(+0.98)SLR	48.02	1368.67	11	0.8	685.343	2	17.4026	729000	6220000	3568	20210614_HS_50ng_F3-1.raw	4		Oxidation (M); Deamidation (NQ)	M7:Oxidation (M):1000.00;N8:Deamidation (NQ):27.16	FALSE
NTLYLQM(+15.99)NSLR	46.42	1367.69	11	-2	684.849	2	17.3879	994000	11700000	3899	20210614_HS_50ng_F2-3.raw	1		Oxidation (M)		FALSE
NTLYLQMNSLR	23.16	1351.69	11	-1	676.852	2	19.4008	151000	1500000	4873	20210614_HS_50ng_F2-1.raw	1				FALSE
NVPLPVIAELPPK	59.06	1385.83	13	0	693.921	2	24.6132	9030000	28600000	5823	20210614_HS_50ng_F3-1.raw	9	P01871|IGHM_HUMAN			FALSE
NVQDAIADAEQR	62.71	1328.63	12	0.5	665.324	2	14.5878	187000	980000	2697	20210614_HS_50ng_F3-3.raw	2	P35908|K22E_HUMAN			FALSE
NVVFVIDK	50.48	932.533	8	2.1	467.275	2	18.621	525000	7330000	4330	20210614_HS_50ng_F2-3.raw	2	Q14624|ITIH4_HUMAN;B7ZKJ8|B7ZKJ8_HUMAN;H7C0L5|H7C0L5_HUMAN			FALSE
NWGLSFYADKPETTK	39.15	1755.85	15	2.1	586.291	3	22.1836	633000	8720000	5314	20210614_HS_50ng_F2-2.raw	3	P19652|A1AG2_HUMAN			FALSE
NWGLSVYADKPETTK	63.57	1707.85	15	2.3	854.933	2	19.2877	2050000	23500000	4834	20210614_HS_50ng_F2-1.raw	4	P02763|A1AG1_HUMAN			FALSE
NYNLVESLK	50.01	1078.57	9	0	540.29	2	18.6787	1510000	8060000	4323	20210614_HS_50ng_F2-3.raw	3	P05546|HEP2_HUMAN			FALSE
NYSPYYNTIDDLK	62.19	1604.74	13	1.1	803.376	2	20.174	66000	1240000	4263	20210614_HS_50ng_F3-3.raw	2	P35527|K1C9_HUMAN			FALSE
NYVDWIM(+15.99)K	40.56	1083.51	8	3.2	542.762	2	19.1212	48000	528000	4518	20210614_HS_50ng_F2-3.raw	1	A0A087X232|A0A087X232_HUMAN;F8WCZ6|F8WCZ6_HUMAN;P09871|C1S_HUMAN	Oxidation (M)		FALSE
Q(+0.98)EPSQGTTTFAVTSILR	43.66	1835.93	17	-7.9	918.963	2	24.2512	135000	856000	5648	20210614_HS_50ng_F4-1.raw	2	P01876|IGHA1_HUMAN;A0A286YEY1|A0A286YEY1_HUMAN	Deamidation (NQ)	Q1:Deamidation (NQ):0.00	FALSE
Q(+0.98)N(+0.98)C(+57.02)ELFE(+21.98)QLGEYK	37.08	1680.7	13	7.2	841.361	2	25.1744	9860	165000	5819	20210614_HS_50ng_F4-1.raw	1	A0A0C4DGB6|A0A0C4DGB6_HUMAN;A0A087WWT3|A0A087WWT3_HUMAN;P02768|ALBU_HUMAN;C9JKR2|C9JKR2_HUMAN;D6RHD5|D6RHD5_HUMAN;B7WNR0|B7WNR0_HUMAN;H0YA55|H0YA55_HUMAN	Deamidation (NQ); Deamidation (NQ); Carbamidomethylation; Sodium adduct	Q1:Deamidation (NQ):26.08;N2:Deamidation (NQ):28.13;C3:Carbamidomethylation:1000.00;E7:Sodium adduct:0.00	FALSE
Q(+0.98)NC(+57.02)E(+21.98)LFEQLGEYK	37.84	1679.71	13	-5.1	840.859	2	24.0893	374000	890000	5672	20210614_HS_50ng_F4-1.raw	1	A0A0C4DGB6|A0A0C4DGB6_HUMAN;A0A087WWT3|A0A087WWT3_HUMAN;P02768|ALBU_HUMAN;C9JKR2|C9JKR2_HUMAN;D6RHD5|D6RHD5_HUMAN;B7WNR0|B7WNR0_HUMAN;H0YA55|H0YA55_HUMAN	Deamidation (NQ); Carbamidomethylation; Sodium adduct	Q1:Deamidation (NQ):0.00;C3:Carbamidomethylation:1000.00;E4:Sodium adduct:16.03	FALSE
Q(+0.98)NC(+57.02)ELFE(+21.98)QLGEYK	42.33	1679.71	13	-5.1	840.859	2	24.0893	374000	890000	5486	20210614_HS_50ng_F4-1.raw	1	A0A0C4DGB6|A0A0C4DGB6_HUMAN;A0A087WWT3|A0A087WWT3_HUMAN;P02768|ALBU_HUMAN;C9JKR2|C9JKR2_HUMAN;D6RHD5|D6RHD5_HUMAN;B7WNR0|B7WNR0_HUMAN;H0YA55|H0YA55_HUMAN	Deamidation (NQ); Carbamidomethylation; Sodium adduct	Q1:Deamidation (NQ):0.00;C3:Carbamidomethylation:1000.00;E7:Sodium adduct:16.03	FALSE
Q(+0.98)NC(+57.02)ELFEQLGEYK	48.9	1657.73	13	-0.8	829.871	2	24.5862	5550000	54800000	4964	20210614_HS_50ng_F4-3.raw	8	A0A0C4DGB6|A0A0C4DGB6_HUMAN;A0A087WWT3|A0A087WWT3_HUMAN;P02768|ALBU_HUMAN;C9JKR2|C9JKR2_HUMAN;D6RHD5|D6RHD5_HUMAN;B7WNR0|B7WNR0_HUMAN;H0YA55|H0YA55_HUMAN	Deamidation (NQ); Carbamidomethylation	Q1:Deamidation (NQ):7.21;C3:Carbamidomethylation:1000.00	FALSE
Q(+0.98)TALVELVK	39.45	1000.58	9	-0.2	501.297	2	19.4222	48900	500000	3693	20210614_HS_50ng_F4-3.raw	1	A0A0C4DGB6|A0A0C4DGB6_HUMAN;A0A087WWT3|A0A087WWT3_HUMAN;P02768|ALBU_HUMAN;C9JKR2|C9JKR2_HUMAN;D6RHD5|D6RHD5_HUMAN;B7WNR0|B7WNR0_HUMAN;H0YA55|H0YA55_HUMAN	Deamidation (NQ)		FALSE
Q(-17.03)APGQELGWM(+15.99)GR	43.52	1327.6	12	-5.1	664.803	2	18.6679	652000	4350000	3287	20210614_HS_50ng_F4-2.raw	4		Pyro-glu from Q; Oxidation (M)		FALSE
Q(-17.03)AVD(+21.98)TAVDGVFIR	48.87	1394.68	13	1.7	698.349	2	22.4855	206000	3130000	5083	20210614_HS_50ng_F4-1.raw	2	P19827|ITIH1_HUMAN;F8WAS2|F8WAS2_HUMAN	Pyro-glu from Q; Sodium adduct	Q1:Pyro-glu from Q:1000.00;D4:Sodium adduct:27.80	FALSE
Q(-17.03)AVDTAVDGVFIR	68.31	1372.7	13	-1.1	687.356	2	23.0842	2320000	20700000	4270	20210614_HS_50ng_F4-2.raw	7	P19827|ITIH1_HUMAN;F8WAS2|F8WAS2_HUMAN	Pyro-glu from Q		FALSE
Q(-17.03)DPPSVVVTSHQAPGEK	66.88	1757.86	17	0.1	879.937	2	16.2772	1990000	13200000	3099	20210614_HS_50ng_F3-3.raw	9	P25311|ZA2G_HUMAN	Pyro-glu from Q		FALSE
Q(-17.03)E(+21.98)PERNEC(+57.02)FLQHKDDNPNLPR	38.25	2640.18	21	2.3	881.068	3	17.4709	24700	445000	3583	20210614_HS_50ng_F1-1.raw	1	A0A0C4DGB6|A0A0C4DGB6_HUMAN;A0A087WWT3|A0A087WWT3_HUMAN;P02768|ALBU_HUMAN;H7C013|H7C013_HUMAN	Pyro-glu from Q; Sodium adduct; Carbamidomethylation	Q1:Pyro-glu from Q:1000.00;E2:Sodium adduct:0.00;C8:Carbamidomethylation:1000.00	FALSE
Q(-17.03)E(+21.98)PSQGTTTFAVTSILR	55.63	1839.9	17	0	920.956	2	24.4557	2330000	15500000	5827	20210614_HS_50ng_F3-1.raw	6	P01876|IGHA1_HUMAN;A0A286YEY1|A0A286YEY1_HUMAN	Pyro-glu from Q; Sodium adduct	Q1:Pyro-glu from Q:1000.00;E2:Sodium adduct:50.98	FALSE
Q(-17.03)EDDLANINQWVK	68.25	1554.73	13	3.5	778.376	2	23.8126	160000	1440000	4924	20210614_HS_50ng_F4-3.raw	4	A0A0J9YY65|A0A0J9YY65_HUMAN;A0A0G2JPA8|A0A0G2JPA8_HUMAN;C9JMH6|C9JMH6_HUMAN;P08697|A2AP_HUMAN	Pyro-glu from Q		FALSE
Q(-17.03)ELSEAEQATR	57.02	1243.57	11	-1.2	622.79	2	11.9051	363000	1130000	2023	20210614_HS_50ng_F4-2.raw	2	P01024|CO3_HUMAN	Pyro-glu from Q		FALSE
Q(-17.03)EPERN(+0.98)EC(+57.02)FLQHK	60.51	1697.75	13	6.5	566.927	3	11.0002	20000000	48900000	2450	20210614_HS_50ng_F2-1.raw	13	A0A0C4DGB6|A0A0C4DGB6_HUMAN;A0A087WWT3|A0A087WWT3_HUMAN;P02768|ALBU_HUMAN;H7C013|H7C013_HUMAN	Pyro-glu from Q; Deamidation (NQ); Carbamidomethylation	Q1:Pyro-glu from Q:1000.00;N6:Deamidation (NQ):76.17;C8:Carbamidomethylation:1000.00	FALSE
Q(-17.03)EPERN(+0.98)EC(+57.02)FLQHKDDNPNLPR	63.96	2619.18	21	-8.3	655.796	4	18.4735	236000	1810000	4156	20210614_HS_50ng_F2-2.raw	3	A0A0C4DGB6|A0A0C4DGB6_HUMAN;A0A087WWT3|A0A087WWT3_HUMAN;P02768|ALBU_HUMAN;H7C013|H7C013_HUMAN	Pyro-glu from Q; Deamidation (NQ); Carbamidomethylation	Q1:Pyro-glu from Q:1000.00;N6:Deamidation (NQ):30.64;C8:Carbamidomethylation:1000.00	FALSE
Q(-17.03)EPERNE(+21.98)C(+57.02)FLQHK	39.73	1718.74	13	-2.2	573.921	3	9.3584	529000	1850000	1872	20210614_HS_50ng_F1-1.raw	6	A0A0C4DGB6|A0A0C4DGB6_HUMAN;A0A087WWT3|A0A087WWT3_HUMAN;P02768|ALBU_HUMAN;H7C013|H7C013_HUMAN	Pyro-glu from Q; Sodium adduct; Carbamidomethylation	Q1:Pyro-glu from Q:1000.00;E7:Sodium adduct:9.42;C8:Carbamidomethylation:1000.00	FALSE
Q(-17.03)EPERNEC(+57.02)FLQ(+0.98)HK	37.79	1697.75	13	2.6	566.924	3	14.0232	515000	4420000	2881	20210614_HS_50ng_F2-2.raw	1	A0A0C4DGB6|A0A0C4DGB6_HUMAN;A0A087WWT3|A0A087WWT3_HUMAN;P02768|ALBU_HUMAN;H7C013|H7C013_HUMAN	Pyro-glu from Q; Carbamidomethylation; Deamidation (NQ)	Q1:Pyro-glu from Q:1000.00;C8:Carbamidomethylation:1000.00;Q11:Deamidation (NQ):0.00	FALSE
Q(-17.03)EPERNEC(+57.02)FLQ(+0.98)HKDDNPNLPR	50.4	2619.18	21	2.1	874.068	3	17.8191	104000	1730000	4299	20210614_HS_50ng_F2-1.raw	3	A0A0C4DGB6|A0A0C4DGB6_HUMAN;A0A087WWT3|A0A087WWT3_HUMAN;P02768|ALBU_HUMAN;H7C013|H7C013_HUMAN	Pyro-glu from Q; Carbamidomethylation; Deamidation (NQ)	Q1:Pyro-glu from Q:1000.00;C8:Carbamidomethylation:1000.00;Q11:Deamidation (NQ):12.60	FALSE
Q(-17.03)EPERNEC(+57.02)FLQHK	65.77	1696.76	13	1.4	566.596	3	15.3169	106000000	612000000	3208	20210614_HS_50ng_F2-2.raw	50	A0A0C4DGB6|A0A0C4DGB6_HUMAN;A0A087WWT3|A0A087WWT3_HUMAN;P02768|ALBU_HUMAN;H7C013|H7C013_HUMAN	Pyro-glu from Q; Carbamidomethylation	C8:Carbamidomethylation:1000.00	FALSE
Q(-17.03)EPERNEC(+57.02)FLQHKDDNPNLPR	110.7	2618.19	21	-9.2	655.55	4	17.7437	17200000	209000000	3502	20210614_HS_50ng_F1-3b.raw	27	A0A0C4DGB6|A0A0C4DGB6_HUMAN;A0A087WWT3|A0A087WWT3_HUMAN;P02768|ALBU_HUMAN;H7C013|H7C013_HUMAN	Pyro-glu from Q; Carbamidomethylation	C8:Carbamidomethylation:1000.00	FALSE
Q(-17.03)EPSQGTTTFAVTSILR	98.49	1817.92	17	-3.4	909.962	2	24.6106	19700000	178000000	4078	20210614_HS_50ng_F5-3.raw	18	P01876|IGHA1_HUMAN;A0A286YEY1|A0A286YEY1_HUMAN	Pyro-glu from Q		FALSE
Q(-17.03)EPSQGTTTYAVTSILR	39.57	1833.91	17	-2.8	917.96	2	22.6235	115000	959000	3784	20210614_HS_50ng_F5-1.raw	2		Pyro-glu from Q		FALSE
Q(-17.03)EYEQLIAK	61.92	1103.55	9	1.2	552.783	2	18.1558	865000	7580000	3767	20210614_HS_50ng_F4-1.raw	5	K7EQQ3|K7EQQ3_HUMAN;P35527|K1C9_HUMAN	Pyro-glu from Q		FALSE
Q(-17.03)FSFPLSSE(+21.98)PFQGSYK	50.41	1852.83	16	3.5	927.425	2	26.8179	191000	1410000	6488	20210614_HS_50ng_F3-1.raw	2	P01023|A2MG_HUMAN	Pyro-glu from Q; Sodium adduct	Q1:Pyro-glu from Q:1000.00;E9:Sodium adduct:38.64	FALSE
Q(-17.03)FSFPLSSEPFQGSYK	79.8	1830.85	16	2.1	916.432	2	27.7508	4360000	25000000	5828	20210614_HS_50ng_F3-2.raw	8	P01023|A2MG_HUMAN	Pyro-glu from Q		FALSE
Q(-17.03)GFFPD(+21.98)SVNK	40.17	1142.5	10	1.5	572.259	2	19.1478	142000	788000	4042	20210614_HS_50ng_F4-1.raw	1	A8MUN2|A8MUN2_HUMAN;P04114|APOB_HUMAN	Pyro-glu from Q; Sodium adduct	Q1:Pyro-glu from Q:1000.00;D6:Sodium adduct:40.19	FALSE
Q(-17.03)GHN(+0.98)SVFLIK	51.34	1125.58	10	2.3	563.799	2	19.4405	1820000	13200000	3999	20210614_HS_50ng_F3-3.raw	5	P02790|HEMO_HUMAN;Q9BS19|Q9BS19_HUMAN	Pyro-glu from Q; Deamidation (NQ)		FALSE
Q(-17.03)GHNSVFLIK	57.17	1124.6	10	1.9	563.307	2	18.7435	7260000	32400000	3916	20210614_HS_50ng_F1-1.raw	5	P02790|HEMO_HUMAN;Q9BS19|Q9BS19_HUMAN	Pyro-glu from Q		FALSE
Q(-17.03)GIPFFGQVR	58.42	1130.59	10	1.7	566.302	2	25.2984	5630000	43300000	4203	20210614_HS_50ng_F5-3.raw	12	P01023|A2MG_HUMAN	Pyro-glu from Q		FALSE
Q(-17.03)GLLPVLE(+21.98)SFK	42.51	1234.66	11	0.4	618.336	2	28.8086	305000	2330000	6567	20210614_HS_50ng_F4-1.raw	3	F8W696|F8W696_HUMAN;P02647|APOA1_HUMAN	Pyro-glu from Q; Sodium adduct	Q1:Pyro-glu from Q:1000.00;E8:Sodium adduct:53.53	FALSE
Q(-17.03)GLLPVLESFK	59.62	1212.68	11	0.2	607.345	2	28.9923	5520000	39200000	5906	20210614_HS_50ng_F4-3.raw	12	F8W696|F8W696_HUMAN;P02647|APOA1_HUMAN	Pyro-glu from Q		FALSE
Q(-17.03)GPVNLLSDPE(+21.98)QGVEVTGQYER	85.05	2419.13	22	-3.5	807.38	3	24.0198	96100	830000	4031	20210614_HS_50ng_F5-1.raw	1	Q14624|ITIH4_HUMAN;B7ZKJ8|B7ZKJ8_HUMAN	Pyro-glu from Q; Sodium adduct	Q1:Pyro-glu from Q:1000.00;E11:Sodium adduct:14.04	FALSE
Q(-17.03)GPVNLLSDPEQGVEVTGQYER	81.26	2397.14	22	1	800.056	3	24.1915	747000	5360000	4017	20210614_HS_50ng_F5-3.raw	4	Q14624|ITIH4_HUMAN;B7ZKJ8|B7ZKJ8_HUMAN	Pyro-glu from Q		FALSE
Q(-17.03)GVD(+21.98)ADIN(+0.98)GLR	48.96	1162.52	11	1.7	582.27	2	16.6222	176000	887000	2999	20210614_HS_50ng_F4-3.raw	3	K7EQQ3|K7EQQ3_HUMAN;P35527|K1C9_HUMAN	Pyro-glu from Q; Sodium adduct; Deamidation (NQ)	Q1:Pyro-glu from Q:1000.00;D4:Sodium adduct:9.40;N8:Deamidation (NQ):1000.00	FALSE
Q(-17.03)GVD(+21.98)ADINGLR	48.41	1161.54	11	-4.4	581.774	2	17.3267	130000	1860000	3536	20210614_HS_50ng_F4-1.raw	2	K7EQQ3|K7EQQ3_HUMAN;P35527|K1C9_HUMAN	Pyro-glu from Q; Sodium adduct	Q1:Pyro-glu from Q:1000.00;D4:Sodium adduct:32.28	FALSE
Q(-17.03)GVDADIN(+0.98)GLR	58.58	1140.54	11	0.3	571.278	2	16.6297	455000	2930000	3000	20210614_HS_50ng_F4-3.raw	6	K7EQQ3|K7EQQ3_HUMAN;P35527|K1C9_HUMAN	Pyro-glu from Q; Deamidation (NQ)		FALSE
Q(-17.03)GVDADINGLR	63.53	1139.56	11	3.8	570.788	2	18.0278	453000	4890000	3140	20210614_HS_50ng_F4-2.raw	3	K7EQQ3|K7EQQ3_HUMAN;P35527|K1C9_HUMAN	Pyro-glu from Q		FALSE
Q(-17.03)GYFVEAQPK	57.41	1148.55	10	5.1	575.285	2	17.7044	538000	3100000	3077	20210614_HS_50ng_F4-2.raw	3	P02743|SAMP_HUMAN	Pyro-glu from Q		FALSE
Q(-17.03)HIEAIDVR	47.12	1062.55	9	2.3	532.28	2	16.8797	208000	1200000	3164	20210614_HS_50ng_F1-2.raw	2	P04114|APOB_HUMAN	Pyro-glu from Q		FALSE
Q(-17.03)ID(+21.98)DIDVR	46.5	977.443	8	0	489.729	2	16.7223	290000	1140000	3401	20210614_HS_50ng_F4-1.raw	2	P04114|APOB_HUMAN	Pyro-glu from Q; Sodium adduct	Q1:Pyro-glu from Q:1000.00;D3:Sodium adduct:30.46	FALSE
Q(-17.03)IDDIDVR	53.08	955.461	8	0.2	478.738	2	17.2863	301000	1820000	3149	20210614_HS_50ng_F4-3.raw	3	P04114|APOB_HUMAN	Pyro-glu from Q		FALSE
Q(-17.03)IND(+21.98)YVEK	38.13	1012.45	8	0.2	507.231	2	13.3632	8680000	13600000	2441	20210614_HS_50ng_F4-3.raw	6		Pyro-glu from Q; Sodium adduct	Q1:Pyro-glu from Q:1000.00;D4:Sodium adduct:54.79	FALSE
Q(-17.03)INDYVE(+21.98)K	38.06	1012.45	8	-1.7	507.23	2	10.3986	5730000	2900000	2449	20210614_HS_50ng_F4-1.raw	1		Pyro-glu from Q; Sodium adduct	Q1:Pyro-glu from Q:1000.00;E7:Sodium adduct:0.00	FALSE
Q(-17.03)INDYVEK	55.46	990.466	8	-1	496.24	2	13.3567	2830000	10200000	2357	20210614_HS_50ng_F4-3.raw	6		Pyro-glu from Q		FALSE
Q(-17.03)IQVSWLR	46.33	1011.55	8	2.9	506.784	2	23.8151	235000	2670000	6437	20210614_HS_50ng_F2-1.raw	3	P01871|IGHM_HUMAN	Pyro-glu from Q		FALSE
Q(-17.03)ISNLQQSISD(+21.98)AEQR	36.57	1720.8	15	2.9	861.409	2	20.8845	282000	2870000	4095	20210614_HS_50ng_F4-3.raw	2	#CONTAM#cont|000132|;#CONTAM#cont|000135|;#CONTAM#cont|000134|;P04264|K2C1_HUMAN	Pyro-glu from Q; Sodium adduct	Q1:Pyro-glu from Q:1000.00;D11:Sodium adduct:32.28	FALSE
Q(-17.03)ISNLQQSISDAEQR	75.11	1698.82	15	-2.8	850.413	2	20.8921	2600000	29200000	3412	20210614_HS_50ng_F5-3.raw	10	#CONTAM#cont|000132|;#CONTAM#cont|000135|;#CONTAM#cont|000134|;P04264|K2C1_HUMAN	Pyro-glu from Q		FALSE
Q(-17.03)KPDGVFQEDAPVIHQEM(+15.99)IGGLR	71.37	2562.25	23	1.6	855.093	3	23.0826	6870000	61800000	4863	20210614_HS_50ng_F3-2.raw	6	P01024|CO3_HUMAN	Pyro-glu from Q; Oxidation (M)		FALSE
Q(-17.03)KVEPLRAELQEGAR	38.13	1705.91	15	3.4	569.646	3	17.8401	45800	557000	3535	20210614_HS_50ng_F1-3b.raw	1	F8W696|F8W696_HUMAN;P02647|APOA1_HUMAN	Pyro-glu from Q		FALSE
Q(-17.03)KWEAEPVYVQR	47.98	1514.75	12	4.4	758.386	2	18.7092	88100	1730000	3931	20210614_HS_50ng_F3-1.raw	4	C9JEV0|C9JEV0_HUMAN;P25311|ZA2G_HUMAN	Pyro-glu from Q		FALSE
Q(-17.03)LGAGSIEEC(+57.02)AAK	61.48	1315.61	13	0.2	658.811	2	16.875	62600	730000	3068	20210614_HS_50ng_F4-3.raw	2	A6PVI2|A6PVI2_HUMAN;Q5TEH5|Q5TEH5_HUMAN;P00747|PLMN_HUMAN	Pyro-glu from Q; Carbamidomethylation	C10:Carbamidomethylation:1000.00	FALSE
Q(-17.03)LNEINYEDHK	53.88	1384.63	11	0.1	693.32	2	15.0952	2770000	18300000	2971	20210614_HS_50ng_F3-1.raw	7	E7ETN3|E7ETN3_HUMAN;P00751|CFAB_HUMAN;A0A0G2JH38|A0A0G2JH38_HUMAN;B4E1Z4|B4E1Z4_HUMAN	Pyro-glu from Q		FALSE
Q(-17.03)LYGDTGVLGR	61.41	1160.58	11	3	581.3	2	19.7243	58500	929000	3771	20210614_HS_50ng_F4-3.raw	3	P07360|CO8G_HUMAN	Pyro-glu from Q		FALSE
Q(-17.03)N(+0.98)C(+57.02)ELFE(+21.98)QLGEYK	40.75	1662.68	13	7.1	832.356	2	24.2664			4076	20210614_HS_50ng_F5-1.raw	1	A0A0C4DGB6|A0A0C4DGB6_HUMAN;A0A087WWT3|A0A087WWT3_HUMAN;P02768|ALBU_HUMAN;C9JKR2|C9JKR2_HUMAN;D6RHD5|D6RHD5_HUMAN;B7WNR0|B7WNR0_HUMAN;H0YA55|H0YA55_HUMAN	Pyro-glu from Q; Deamidation (NQ); Carbamidomethylation; Sodium adduct	Q1:Pyro-glu from Q:1000.00;N2:Deamidation (NQ):0.00;C3:Carbamidomethylation:1000.00;E7:Sodium adduct:34.87	FALSE
Q(-17.03)N(+0.98)C(+57.02)ELFEQLGEYK	51.85	1640.7	13	8.5	821.366	2	23.5575	16000000	70800000	5584	20210614_HS_50ng_F4-1.raw	1	A0A0C4DGB6|A0A0C4DGB6_HUMAN;A0A087WWT3|A0A087WWT3_HUMAN;P02768|ALBU_HUMAN;C9JKR2|C9JKR2_HUMAN;D6RHD5|D6RHD5_HUMAN;B7WNR0|B7WNR0_HUMAN;H0YA55|H0YA55_HUMAN	Pyro-glu from Q; Deamidation (NQ); Carbamidomethylation	Q1:Pyro-glu from Q:1000.00;N2:Deamidation (NQ):31.24;C3:Carbamidomethylation:1000.00	FALSE
Q(-17.03)NC(+57.02)E(+21.98)LFEQLGEYK	66.73	1661.7	13	-1.3	831.857	2	23.5575	4770000	23400000	5588	20210614_HS_50ng_F4-1.raw	6	A0A0C4DGB6|A0A0C4DGB6_HUMAN;A0A087WWT3|A0A087WWT3_HUMAN;P02768|ALBU_HUMAN;C9JKR2|C9JKR2_HUMAN;D6RHD5|D6RHD5_HUMAN;B7WNR0|B7WNR0_HUMAN;H0YA55|H0YA55_HUMAN	Pyro-glu from Q; Carbamidomethylation; Sodium adduct	Q1:Pyro-glu from Q:1000.00;C3:Carbamidomethylation:1000.00;E4:Sodium adduct:0.00	FALSE
Q(-17.03)NC(+57.02)ELFE(+21.98)QLGEYK	87.48	1661.7	13	-0.1	831.857	2	23.7292	9650000	61400000	3930	20210614_HS_50ng_F5-3.raw	14	A0A0C4DGB6|A0A0C4DGB6_HUMAN;A0A087WWT3|A0A087WWT3_HUMAN;P02768|ALBU_HUMAN;C9JKR2|C9JKR2_HUMAN;D6RHD5|D6RHD5_HUMAN;B7WNR0|B7WNR0_HUMAN;H0YA55|H0YA55_HUMAN	Pyro-glu from Q; Carbamidomethylation; Sodium adduct	Q1:Pyro-glu from Q:1000.00;C3:Carbamidomethylation:1000.00;E7:Sodium adduct:49.43	FALSE
Q(-17.03)NC(+57.02)ELFEQ(+0.98)LGEYK	50.14	1640.7	13	8.5	821.366	2	23.5575	16000000	70800000	5377	20210614_HS_50ng_F4-1.raw	1	A0A0C4DGB6|A0A0C4DGB6_HUMAN;A0A087WWT3|A0A087WWT3_HUMAN;P02768|ALBU_HUMAN;C9JKR2|C9JKR2_HUMAN;D6RHD5|D6RHD5_HUMAN;B7WNR0|B7WNR0_HUMAN;H0YA55|H0YA55_HUMAN	Pyro-glu from Q; Carbamidomethylation; Deamidation (NQ)	Q1:Pyro-glu from Q:1000.00;C3:Carbamidomethylation:1000.00;Q8:Deamidation (NQ):18.80	FALSE
Q(-17.03)NC(+57.02)ELFEQLGEYK	91.08	1639.72	13	-1.6	820.865	2	24.2264	82000000	704000000	3892	20210614_HS_50ng_F5-2.raw	48	A0A0C4DGB6|A0A0C4DGB6_HUMAN;A0A087WWT3|A0A087WWT3_HUMAN;P02768|ALBU_HUMAN;C9JKR2|C9JKR2_HUMAN;D6RHD5|D6RHD5_HUMAN;B7WNR0|B7WNR0_HUMAN;H0YA55|H0YA55_HUMAN	Pyro-glu from Q; Carbamidomethylation	C3:Carbamidomethylation:1000.00	FALSE
Q(-17.03)PQFISR	42.2	857.439	7	-0.5	429.727	2	14.8768	247000	632000	2906	20210614_HS_50ng_F4-3.raw	1	P04004|VTNC_HUMAN	Pyro-glu from Q		FALSE
Q(-17.03)PSSAFAAFVK	71.85	1134.57	11	2	568.294	2	23.4774	5000000	40600000	4351	20210614_HS_50ng_F4-2.raw	8	P01024|CO3_HUMAN	Pyro-glu from Q		FALSE
Q(-17.03)PVPGQQM(+15.99)TLK	46.05	1224.62	11	-0.1	613.316	2	13.1208	2020000	6230000	2604	20210614_HS_50ng_F2-3.raw	2	P01024|CO3_HUMAN	Pyro-glu from Q; Oxidation (M)		FALSE
Q(-17.03)QNAQGGFSSTQ(+0.98)D(+21.98)TVVALHALSK	45.88	2392.13	23	8.7	798.39	3	22.2051	8700	506000	5894	20210614_HS_50ng_F2-1.raw	1	P01023|A2MG_HUMAN	Pyro-glu from Q; Deamidation (NQ); Sodium adduct	Q1:Pyro-glu from Q:1000.00;Q12:Deamidation (NQ):8.52;D13:Sodium adduct:74.64	FALSE
Q(-17.03)QNAQGGFSSTQD(+21.98)TVVALHALSK	69.36	2391.14	23	-2.6	798.053	3	22.2555	44700	1690000	4998	20210614_HS_50ng_F4-1.raw	3	P01023|A2MG_HUMAN	Pyro-glu from Q; Sodium adduct	Q1:Pyro-glu from Q:1000.00;D13:Sodium adduct:72.22	FALSE
Q(-17.03)QNAQGGFSSTQDTVVALHALSK	69.54	2369.16	23	0.2	790.728	3	22.1722	2430000	24100000	5876	20210614_HS_50ng_F2-1.raw	10	P01023|A2MG_HUMAN	Pyro-glu from Q		FALSE
Q(-17.03)QTHM(+15.99)LDVM(+15.99)QDHFSR	34.84	1886.8	15	2	629.943	3	15.7046	966000	6020000	3334	20210614_HS_50ng_F2-3.raw	4	H0YLK8|H0YLK8_HUMAN;P10909|CLUS_HUMAN;H0YC35|H0YC35_HUMAN;E7ETB4|E7ETB4_HUMAN;E7ERK6|E7ERK6_HUMAN	Pyro-glu from Q; Oxidation (M); Oxidation (M)		FALSE
Q(-17.03)RQEELC(+57.02)LAR	55.33	1284.62	10	1.5	643.321	2	14.8996	378000	2160000	3118	20210614_HS_50ng_F2-3.raw	2	Q5VY30|Q5VY30_HUMAN;P02753|RET4_HUMAN	Pyro-glu from Q; Carbamidomethylation	C7:Carbamidomethylation:1000.00	FALSE
Q(-17.03)SED(+21.98)STFYLGER	52.29	1435.59	12	-0.3	718.8	2	18.2461	425000	2150000	3790	20210614_HS_50ng_F4-1.raw	2	E9PFZ2|E9PFZ2_HUMAN;H7C5R1|H7C5R1_HUMAN;P00450|CERU_HUMAN	Pyro-glu from Q; Sodium adduct	Q1:Pyro-glu from Q:1000.00;D4:Sodium adduct:26.02	FALSE
Q(-17.03)SEDSTFYLGER	68.08	1413.6	12	0.8	707.81	2	18.6108	1770000	11000000	3469	20210614_HS_50ng_F4-3.raw	6	E9PFZ2|E9PFZ2_HUMAN;H7C5R1|H7C5R1_HUMAN;P00450|CERU_HUMAN	Pyro-glu from Q		FALSE
Q(-17.03)SFDLSVK	53.61	905.449	8	-2.7	453.731	2	18.4679	41900	325000	3876	20210614_HS_50ng_F4-1.raw	1	P04114|APOB_HUMAN	Pyro-glu from Q		FALSE
Q(-17.03)SLEASLAETEGR	72.88	1372.65	13	-4.2	687.328	2	18.5063	467000	4500000	3870	20210614_HS_50ng_F4-1.raw	5	#CONTAM#cont|000133|;#CONTAM#cont|000131|;P13645|K1C10_HUMAN;#CONTAM#cont|000129|;#CONTAM#cont|000136|;#CONTAM#cont|000122|;#CONTAM#cont|000130|	Pyro-glu from Q		FALSE
Q(-17.03)STNAYPDLR	52.95	1146.53	10	1.1	574.273	2	13.96	94700	307000	2498	20210614_HS_50ng_F4-3.raw	1	A0A3B3ISJ1|A0A3B3ISJ1_HUMAN;G5E9F8|G5E9F8_HUMAN;P07225|PROS_HUMAN;A0A0S2Z4L3|A0A0S2Z4L3_HUMAN;A0A3B3IRK9|A0A3B3IRK9_HUMAN	Pyro-glu from Q		FALSE
Q(-17.03)SVE(+21.98)ADIN(+0.98)GLR	46.78	1206.55	11	1.3	604.283	2	16.7223	73100	405000	3425	20210614_HS_50ng_F4-1.raw	1	#CONTAM#cont|000133|;#CONTAM#cont|000131|;P13645|K1C10_HUMAN;#CONTAM#cont|000129|;#CONTAM#cont|000136|;#CONTAM#cont|000122|;#CONTAM#cont|000130|	Pyro-glu from Q; Sodium adduct; Deamidation (NQ)	Q1:Pyro-glu from Q:1000.00;E4:Sodium adduct:14.04;N8:Deamidation (NQ):1000.00	FALSE
Q(-17.03)SVEADIN(+0.98)GLR	55.3	1184.57	11	1.6	593.292	2	16.7223	255000	1560000	3417	20210614_HS_50ng_F4-1.raw	3	#CONTAM#cont|000133|;#CONTAM#cont|000131|;P13645|K1C10_HUMAN;#CONTAM#cont|000129|;#CONTAM#cont|000136|;#CONTAM#cont|000122|;#CONTAM#cont|000130|	Pyro-glu from Q; Deamidation (NQ)		FALSE
Q(-17.03)SVEADINGLR	51.38	1183.58	11	1.2	592.8	2	19.1931	69400	727000	3418	20210614_HS_50ng_F4-2.raw	1	#CONTAM#cont|000133|;#CONTAM#cont|000131|;P13645|K1C10_HUMAN;#CONTAM#cont|000129|;#CONTAM#cont|000136|;#CONTAM#cont|000122|;#CONTAM#cont|000130|	Pyro-glu from Q		FALSE
Q(-17.03)TALVE(+21.98)LVK	49.82	1004.55	9	-4.3	503.281	2	22.1364	42000000	353000000	4927	20210614_HS_50ng_F4-1.raw	16	A0A0C4DGB6|A0A0C4DGB6_HUMAN;A0A087WWT3|A0A087WWT3_HUMAN;P02768|ALBU_HUMAN;C9JKR2|C9JKR2_HUMAN;D6RHD5|D6RHD5_HUMAN;B7WNR0|B7WNR0_HUMAN;H0YA55|H0YA55_HUMAN	Pyro-glu from Q; Sodium adduct	Q1:Pyro-glu from Q:1000.00;E6:Sodium adduct:77.25	FALSE
Q(-17.03)TALVELLK	35.9	996.586	9	2.4	499.301	2	22.5954	217000	3070000	5756	20210614_HS_50ng_F2-3.raw	3	#CONTAM#cont|000097|;#CONTAM#cont|000035|;#CONTAM#cont|000017|	Pyro-glu from Q		FALSE
Q(-17.03)TALVELVK	57.66	982.57	9	1.9	492.293	2	22.033	66000000	449000000	4919	20210614_HS_50ng_F4-1.raw	52	A0A0C4DGB6|A0A0C4DGB6_HUMAN;A0A087WWT3|A0A087WWT3_HUMAN;P02768|ALBU_HUMAN;C9JKR2|C9JKR2_HUMAN;D6RHD5|D6RHD5_HUMAN;B7WNR0|B7WNR0_HUMAN;H0YA55|H0YA55_HUMAN	Pyro-glu from Q		FALSE
Q(-17.03)THQPPAPNSLIR	39.65	1440.75	13	-4.7	721.378	2	17.0134	439000	4100000	3305	20210614_HS_50ng_F3-3.raw	4	P02747|C1QC_HUMAN	Pyro-glu from Q		FALSE
Q(-17.03)TQVSVLPEGGETPLFK	71.63	1811.93	17	2.3	906.975	2	24.1967	710000	7180000	5592	20210614_HS_50ng_F4-1.raw	8	A0A0A0MS51|A0A0A0MS51_HUMAN;P06396|GELS_HUMAN;A0A0A0MT01|A0A0A0MT01_HUMAN	Pyro-glu from Q		FALSE
Q(-17.03)TVSWAVTPK	67.28	1098.57	10	0.7	550.293	2	19.1478	2170000	21200000	4037	20210614_HS_50ng_F4-1.raw	7	P01023|A2MG_HUMAN	Pyro-glu from Q		FALSE
Q(-17.03)VGSGVTTD(+21.98)QVQAEAK	52.72	1621.76	16	0.8	811.886	2	15.4626	1810000	8860000	2650	20210614_HS_50ng_F4-2.raw	5	P01871|IGHM_HUMAN	Pyro-glu from Q; Sodium adduct	Q1:Pyro-glu from Q:1000.00;D9:Sodium adduct:62.80	FALSE
Q(-17.03)VGSGVTTDQVQAEAK	76.99	1599.77	16	0.4	800.895	2	15.4757	4590000	24900000	2639	20210614_HS_50ng_F4-2.raw	7	P01871|IGHM_HUMAN	Pyro-glu from Q		FALSE
Q(-17.03)VLDNLTM(+15.99)EK	51.09	1188.57	10	0.1	595.292	2	17.8635	1700000	11500000	3681	20210614_HS_50ng_F4-1.raw	6	K7EQQ3|K7EQQ3_HUMAN;P35527|K1C9_HUMAN	Pyro-glu from Q; Oxidation (M)		FALSE
Q(-17.03)VQVEGLSGNIK	38.29	1253.66	12	2.3	627.84	2	15.5868	549000	2630000	2779	20210614_HS_50ng_F4-3.raw	3		Pyro-glu from Q		FALSE
Q(-17.03)VVAGLNFR	62.78	985.534	9	-0.3	493.774	2	21.469	1820000	14000000	4246	20210614_HS_50ng_F4-3.raw	6	P01042|KNG1_HUMAN	Pyro-glu from Q		FALSE
Q(-17.03)YYEGSEIVVAGR	73.44	1452.69	13	2.4	727.353	2	19.974	1010000	8180000	3581	20210614_HS_50ng_F4-2.raw	5	P19827|ITIH1_HUMAN;H7C0N0|H7C0N0_HUMAN	Pyro-glu from Q		FALSE
QAVDTAVDGVFIR	63.2	1389.73	13	2.6	695.872	2	21.0205	1150000	11500000	4277	20210614_HS_50ng_F3-2.raw	3	P19827|ITIH1_HUMAN;F8WAS2|F8WAS2_HUMAN			FALSE
QDPPSVVVTSHQAPGEK	46.11	1774.88	17	2.8	592.637	3	14.0426	812000	3480000	2867	20210614_HS_50ng_F2-3.raw	2	P25311|ZA2G_HUMAN			FALSE
QE(+21.98)PERNE(+21.98)C(+57.02)FLQHKDDNPNLPR	43.77	2679.18	21	7.4	670.808	4	17.0179	149000	1470000	3426	20210614_HS_50ng_F1-1.raw	1	A0A0C4DGB6|A0A0C4DGB6_HUMAN;A0A087WWT3|A0A087WWT3_HUMAN;P02768|ALBU_HUMAN;H7C013|H7C013_HUMAN	Sodium adduct; Sodium adduct; Carbamidomethylation	E2:Sodium adduct:0.00;E7:Sodium adduct:0.00;C8:Carbamidomethylation:1000.00	FALSE
QEDDLANINQWVK	35.57	1571.76	13	2.8	786.889	2	22.1887	217000	3120000	4947	20210614_HS_50ng_F3-3.raw	3	A0A0J9YY65|A0A0J9YY65_HUMAN;A0A0G2JPA8|A0A0G2JPA8_HUMAN;C9JMH6|C9JMH6_HUMAN;P08697|A2AP_HUMAN			FALSE
QEPERN(+0.98)EC(+57.02)FLQHKDDNPNLPR	43.55	2636.2	21	9.8	660.063	4	17.0245	792000	7450000	3157	20210614_HS_50ng_F1-2.raw	2	A0A0C4DGB6|A0A0C4DGB6_HUMAN;A0A087WWT3|A0A087WWT3_HUMAN;P02768|ALBU_HUMAN;H7C013|H7C013_HUMAN	Deamidation (NQ); Carbamidomethylation	N6:Deamidation (NQ):0.00;C8:Carbamidomethylation:1000.00	FALSE
QEPERNEC(+57.02)FLQHK	34.32	1713.79	13	1	572.269	3	7.4566	6110000	23800000	1379	20210614_HS_50ng_F1-2.raw	5	A0A0C4DGB6|A0A0C4DGB6_HUMAN;A0A087WWT3|A0A087WWT3_HUMAN;P02768|ALBU_HUMAN;H7C013|H7C013_HUMAN	Carbamidomethylation	C8:Carbamidomethylation:1000.00	FALSE
QEPERNEC(+57.02)FLQHKDDNPNLPR	72.37	2635.22	21	3.1	879.417	3	16.5986	12000000	76000000	3168	20210614_HS_50ng_F1-3b.raw	22	A0A0C4DGB6|A0A0C4DGB6_HUMAN;A0A087WWT3|A0A087WWT3_HUMAN;P02768|ALBU_HUMAN;H7C013|H7C013_HUMAN	Carbamidomethylation	C8:Carbamidomethylation:1000.00	FALSE
QEPSQGTTTFAVTSILR	75.68	1834.94	17	-1.5	918.477	2	24.6172	26700000	299000000	4085	20210614_HS_50ng_F5-3.raw	24	P01876|IGHA1_HUMAN;A0A286YEY1|A0A286YEY1_HUMAN			FALSE
QEPSQGTTTYAVTSILR	58.85	1850.94	17	2.2	926.478	2	21.1971	287000	3730000	4752	20210614_HS_50ng_F3-1.raw	3				FALSE
QEYEQLIAK	55.48	1120.58	9	-0.6	561.295	2	14.5105	1340000	6860000	2985	20210614_HS_50ng_F2-2.raw	4	K7EQQ3|K7EQQ3_HUMAN;P35527|K1C9_HUMAN			FALSE
QFPILLDFK	52.09	1119.63	9	5.2	560.827	2	27.1098	804000	5560000	6987	20210614_HS_50ng_F2-3.raw	3	P05546|HEP2_HUMAN			FALSE
QFSFPLSSEPFQGSYK	64.61	1847.87	16	1.9	924.946	2	25.0904	5630000	44800000	5782	20210614_HS_50ng_F3-3.raw	9	P01023|A2MG_HUMAN			FALSE
QGFFPDSVNK	37.42	1137.55	10	-1.5	569.779	2	16.51	480000	2370000	3865	20210614_HS_50ng_F2-1.raw	1	A8MUN2|A8MUN2_HUMAN;P04114|APOB_HUMAN			FALSE
QGIPFFGQVR	58.21	1147.61	10	2.4	574.816	2	23.5151	5520000	23000000	5725	20210614_HS_50ng_F2-2.raw	6	P01023|A2MG_HUMAN			FALSE
QGLLPVLESFK	63.23	1229.7	11	-1.9	615.857	2	25.7942	10100000	103000000	7050	20210614_HS_50ng_F2-1.raw	11	F8W696|F8W696_HUMAN;P02647|APOA1_HUMAN			FALSE
QGPVNLLSDPEQGVEVTGQYER	41.86	2414.17	22	2.2	805.733	3	22.4241	77900	1240000	5047	20210614_HS_50ng_F4-1.raw	2	Q14624|ITIH4_HUMAN;B7ZKJ8|B7ZKJ8_HUMAN			FALSE
QGVDADIN(+0.98)GLR	36.24	1157.57	11	1.1	579.792	2	16.7381	173000	786000	3173	20210614_HS_50ng_F3-2.raw	2	K7EQQ3|K7EQQ3_HUMAN;P35527|K1C9_HUMAN	Deamidation (NQ)	N8:Deamidation (NQ):31.93	FALSE
QGVDADINGLR	51.61	1156.58	11	4.4	579.302	2	15.3674	619000	3430000	3204	20210614_HS_50ng_F2-2.raw	3	K7EQQ3|K7EQQ3_HUMAN;P35527|K1C9_HUMAN			FALSE
QGYFVEAQPK	51.55	1165.58	10	0.3	583.796	2	13.5492	1400000	4950000	2762	20210614_HS_50ng_F2-2.raw	6	P02743|SAMP_HUMAN			FALSE
QINDYVEK	39.84	1007.49	8	1.6	504.754	2	9.6077	1230000	12100000	2193	20210614_HS_50ng_F2-1.raw	8				FALSE
QIQVSWLR	42.54	1028.58	8	2	515.297	2	20.8054	2760000	25100000	5356	20210614_HS_50ng_F2-1.raw	5	P01871|IGHM_HUMAN			FALSE
QISNLQQSISDAEQR	65.74	1715.84	15	0.4	858.93	2	17.7919	2740000	22400000	3516	20210614_HS_50ng_F3-3.raw	8	#CONTAM#cont|000132|;#CONTAM#cont|000135|;#CONTAM#cont|000134|;P04264|K2C1_HUMAN			FALSE
QKPDGVFQEDAPVIHQEM(+15.99)IGGLR	43.92	2579.28	23	1.4	860.769	3	21.1373	4880000	25300000	5501	20210614_HS_50ng_F2-1.raw	4	P01024|CO3_HUMAN	Oxidation (M)		FALSE
QLGAGSIEEC(+57.02)AAK	50.48	1332.63	13	-0.3	667.324	2	13.3124	239000	1290000	2444	20210614_HS_50ng_F3-2.raw	3	A6PVI2|A6PVI2_HUMAN;Q5TEH5|Q5TEH5_HUMAN;P00747|PLMN_HUMAN	Carbamidomethylation	C10:Carbamidomethylation:1000.00	FALSE
QN(+0.98)C(+57.02)ELFEQLGEYK	68.16	1657.73	13	-0.2	829.872	2	22.3208	2700000	17300000	4487	20210614_HS_50ng_F4-3.raw	4	A0A0C4DGB6|A0A0C4DGB6_HUMAN;A0A087WWT3|A0A087WWT3_HUMAN;P02768|ALBU_HUMAN;C9JKR2|C9JKR2_HUMAN;D6RHD5|D6RHD5_HUMAN;B7WNR0|B7WNR0_HUMAN;H0YA55|H0YA55_HUMAN	Deamidation (NQ); Carbamidomethylation	N2:Deamidation (NQ):0.00;C3:Carbamidomethylation:1000.00	FALSE
QNC(+57.02)E(+21.98)LFEQLGEYK	45.36	1678.73	13	3.6	560.585	3	22.3516	49900	445000	5157	20210614_HS_50ng_F3-1.raw	2	A0A0C4DGB6|A0A0C4DGB6_HUMAN;A0A087WWT3|A0A087WWT3_HUMAN;P02768|ALBU_HUMAN;C9JKR2|C9JKR2_HUMAN;D6RHD5|D6RHD5_HUMAN;B7WNR0|B7WNR0_HUMAN;H0YA55|H0YA55_HUMAN	Carbamidomethylation; Sodium adduct	C3:Carbamidomethylation:1000.00;E4:Sodium adduct:22.45	FALSE
QNC(+57.02)ELFE(+21.98)QLGEYK	54.06	1678.73	13	1	560.584	3	21.96	4050000	32800000	4841	20210614_HS_50ng_F3-3.raw	5	A0A0C4DGB6|A0A0C4DGB6_HUMAN;A0A087WWT3|A0A087WWT3_HUMAN;P02768|ALBU_HUMAN;C9JKR2|C9JKR2_HUMAN;D6RHD5|D6RHD5_HUMAN;B7WNR0|B7WNR0_HUMAN;H0YA55|H0YA55_HUMAN	Carbamidomethylation; Sodium adduct	C3:Carbamidomethylation:1000.00;E7:Sodium adduct:0.00	FALSE
QNC(+57.02)ELFEQLGEYK	72.17	1656.75	13	-4.7	829.376	2	24.2326	36700000	251000000	3909	20210614_HS_50ng_F5-2.raw	60	A0A0C4DGB6|A0A0C4DGB6_HUMAN;A0A087WWT3|A0A087WWT3_HUMAN;P02768|ALBU_HUMAN;C9JKR2|C9JKR2_HUMAN;D6RHD5|D6RHD5_HUMAN;B7WNR0|B7WNR0_HUMAN;H0YA55|H0YA55_HUMAN	Carbamidomethylation	C3:Carbamidomethylation:1000.00	FALSE
QPSSAFAAFVK	25.36	1151.6	11	2.7	576.808	2	20.5895	1060000	10600000	4821	20210614_HS_50ng_F2-2.raw	1	P01024|CO3_HUMAN			FALSE
QQNAQ(+0.98)GGFSSTQDTVVALHALSK	47.22	2387.17	23	7.4	796.737	3	22.5257			5716	20210614_HS_50ng_F2-3.raw	1	P01023|A2MG_HUMAN	Deamidation (NQ)	Q5:Deamidation (NQ):0.00	FALSE
QQNAQGGFSSTQDTVVALHALSK	61.03	2386.19	23	2.3	796.405	3	21.0856	6080000	60800000	5470	20210614_HS_50ng_F2-1.raw	10	P01023|A2MG_HUMAN			FALSE
QSEDSTFYLGER	57.54	1430.63	12	-6.4	716.318	2	16.8556	1900000	9430000	3270	20210614_HS_50ng_F3-3.raw	4	E9PFZ2|E9PFZ2_HUMAN;H7C5R1|H7C5R1_HUMAN;P00450|CERU_HUMAN			FALSE
QSFDLSVK	31.44	922.476	8	-1.6	462.245	2	15.8203	357000	2230000	3330	20210614_HS_50ng_F2-2.raw	2	P04114|APOB_HUMAN			FALSE
QSLEASLAETEGR	42.56	1389.67	13	-1.4	695.843	2	15.5175	791000	5400000	3087	20210614_HS_50ng_F3-1.raw	3	#CONTAM#cont|000133|;#CONTAM#cont|000131|;P13645|K1C10_HUMAN;#CONTAM#cont|000129|;#CONTAM#cont|000136|;#CONTAM#cont|000122|;#CONTAM#cont|000130|			FALSE
QSSSYSFFK	48.48	1079.49	9	0.6	540.754	2	17.3938	138000	1940000	3910	20210614_HS_50ng_F2-3.raw	2	P04003|C4BPA_HUMAN			FALSE
QSVEADIN(+0.98)GLR	51.3	1201.59	11	0.2	601.804	2	14.1921	182000	859000	2622	20210614_HS_50ng_F3-3.raw	2	#CONTAM#cont|000133|;#CONTAM#cont|000131|;P13645|K1C10_HUMAN;#CONTAM#cont|000129|;#CONTAM#cont|000136|;#CONTAM#cont|000122|;#CONTAM#cont|000130|	Deamidation (NQ)	N8:Deamidation (NQ):79.54	FALSE
QSVEADINGLR	58.13	1200.61	11	1.6	601.313	2	16.7438	367000	3350000	3678	20210614_HS_50ng_F2-3.raw	2	#CONTAM#cont|000133|;#CONTAM#cont|000131|;P13645|K1C10_HUMAN;#CONTAM#cont|000129|;#CONTAM#cont|000136|;#CONTAM#cont|000122|;#CONTAM#cont|000130|			FALSE
QTALVE(+21.98)LVK	49.06	1021.58	9	-1.9	511.796	2	18.2949	9790000	29600000	4442	20210614_HS_50ng_F2-1.raw	4	A0A0C4DGB6|A0A0C4DGB6_HUMAN;A0A087WWT3|A0A087WWT3_HUMAN;P02768|ALBU_HUMAN;C9JKR2|C9JKR2_HUMAN;D6RHD5|D6RHD5_HUMAN;B7WNR0|B7WNR0_HUMAN;H0YA55|H0YA55_HUMAN	Sodium adduct	E6:Sodium adduct:48.45	FALSE
QTALVELVK	53.15	999.596	9	0.4	500.806	2	19.4887	16000000	89200000	4913	20210614_HS_50ng_F2-1.raw	70	A0A0C4DGB6|A0A0C4DGB6_HUMAN;A0A087WWT3|A0A087WWT3_HUMAN;P02768|ALBU_HUMAN;C9JKR2|C9JKR2_HUMAN;D6RHD5|D6RHD5_HUMAN;B7WNR0|B7WNR0_HUMAN;H0YA55|H0YA55_HUMAN			FALSE
QTHQPPAPNSLIR	36.04	1457.77	13	-2.6	486.931	3	14.71	37800	289000	2708	20210614_HS_50ng_F1-3b.raw	1	P02747|C1QC_HUMAN			FALSE
QTQVSVLPEGGETPLFK	60.5	1828.96	17	1	915.487	2	22.8512	838000	8470000	5319	20210614_HS_50ng_F3-1.raw	6	A0A0A0MS51|A0A0A0MS51_HUMAN;P06396|GELS_HUMAN;A0A0A0MT01|A0A0A0MT01_HUMAN			FALSE
QTVSWAVTPK	59.72	1115.6	10	2.6	558.808	2	15.8968	10100000	66500000	3714	20210614_HS_50ng_F2-1.raw	9	P01023|A2MG_HUMAN			FALSE
QVGSGVTTDQVQAEAK	49.79	1616.8	16	-0.1	809.408	2	7.7541	1010000	5760000	1438	20210614_HS_50ng_F3-3.raw	1	P01871|IGHM_HUMAN			FALSE
QVVAGLNFR	53.43	1002.56	9	2.3	502.289	2	18.7628	2560000	16100000	4220	20210614_HS_50ng_F2-2.raw	3	P01042|KNG1_HUMAN			FALSE
QYYEGSEIVVAGR	53.26	1469.72	13	-3.6	735.862	2	17.4054	450000	4220000	3458	20210614_HS_50ng_F3-3.raw	2	P19827|ITIH1_HUMAN;H7C0N0|H7C0N0_HUMAN			FALSE
RHPDLSIPELLR	66.35	1444.82	12	1.6	482.613	3	22.7942	210000	1390000	4772	20210614_HS_50ng_F1-3b.raw	2	P43652|AFAM_HUMAN			FALSE
RHPDYSVVLLLR	81.4	1466.84	12	-4.5	489.95	3	22.8055	22700000	242000000	5012	20210614_HS_50ng_F1-1.raw	29	A0A0C4DGB6|A0A0C4DGB6_HUMAN;P02768|ALBU_HUMAN;C9JKR2|C9JKR2_HUMAN;D6RHD5|D6RHD5_HUMAN;B7WNR0|B7WNR0_HUMAN;H0YA55|H0YA55_HUMAN			FALSE
RHPYFYAPELLFFAK	64.71	1897.99	15	-4	633.667	3	29.0268	387000	399000	6139	20210614_HS_50ng_F1-1.raw	1	A0A0C4DGB6|A0A0C4DGB6_HUMAN;P02768|ALBU_HUMAN;H7C013|H7C013_HUMAN;D6RHD5|D6RHD5_HUMAN;B7WNR0|B7WNR0_HUMAN;H0YA55|H0YA55_HUMAN			FALSE
RIPIEDGSGEVVLSR	80.12	1625.87	15	0.6	542.966	3	19.1623	4690000	39700000	4368	20210614_HS_50ng_F2-2.raw	7	P01024|CO3_HUMAN			FALSE
RPASPISTIQPK	36.62	1293.74	12	-3.4	432.253	3	13.0972	62400	401000	2378	20210614_HS_50ng_F1-3b.raw	2	P07360|CO8G_HUMAN			FALSE
RPC(+57.02)FSALE(+21.98)VDETYVPK	50.83	1931.91	16	1.8	644.977	3	21.3797	8880000	60900000	5586	20210614_HS_50ng_F2-1.raw	2	A0A0C4DGB6|A0A0C4DGB6_HUMAN;A0A087WWT3|A0A087WWT3_HUMAN;P02768|ALBU_HUMAN;C9JKR2|C9JKR2_HUMAN;D6RHD5|D6RHD5_HUMAN;B7WNR0|B7WNR0_HUMAN;H0YA55|H0YA55_HUMAN	Carbamidomethylation; Sodium adduct	C3:Carbamidomethylation:1000.00;E8:Sodium adduct:0.00	FALSE
RPC(+57.02)FSALEVD(+21.98)ETYVPK	38.9	1931.91	16	0.3	644.976	3	21.7364	170000	1200000	4785	20210614_HS_50ng_F3-3.raw	1	A0A0C4DGB6|A0A0C4DGB6_HUMAN;A0A087WWT3|A0A087WWT3_HUMAN;P02768|ALBU_HUMAN;C9JKR2|C9JKR2_HUMAN;D6RHD5|D6RHD5_HUMAN;B7WNR0|B7WNR0_HUMAN;H0YA55|H0YA55_HUMAN	Carbamidomethylation; Sodium adduct	C3:Carbamidomethylation:1000.00;D10:Sodium adduct:0.00	FALSE
RPC(+57.02)FSALEVDE(+21.98)TYVPK	52.16	1931.91	16	2.6	644.978	3	21.7614	2940000	18800000	5440	20210614_HS_50ng_F2-3.raw	4	A0A0C4DGB6|A0A0C4DGB6_HUMAN;A0A087WWT3|A0A087WWT3_HUMAN;P02768|ALBU_HUMAN;C9JKR2|C9JKR2_HUMAN;D6RHD5|D6RHD5_HUMAN;B7WNR0|B7WNR0_HUMAN;H0YA55|H0YA55_HUMAN	Carbamidomethylation; Sodium adduct	C3:Carbamidomethylation:1000.00;E11:Sodium adduct:0.00	FALSE
RPC(+57.02)FSALEVDETYVPK	72.91	1909.92	16	1.6	637.65	3	23.3067	228000000	2560000000	5703	20210614_HS_50ng_F2-2.raw	130	A0A0C4DGB6|A0A0C4DGB6_HUMAN;A0A087WWT3|A0A087WWT3_HUMAN;P02768|ALBU_HUMAN;C9JKR2|C9JKR2_HUMAN;D6RHD5|D6RHD5_HUMAN;B7WNR0|B7WNR0_HUMAN;H0YA55|H0YA55_HUMAN	Carbamidomethylation	C3:Carbamidomethylation:1000.00	FALSE
RPYFPVAVGK	34.89	1132.64	10	6.2	567.329	2	18.6413	1370000	9530000	3578	20210614_HS_50ng_F1-2.raw	4	A0A0D9SG88|A0A0D9SG88_HUMAN;P08603|CFAH_HUMAN;Q5TFM2|Q5TFM2_HUMAN			FALSE
RQSEDSTFYLGER	50	1586.73	13	-0.9	529.918	3	15.8577	142000	918000	3348	20210614_HS_50ng_F2-2.raw	2	E9PFZ2|E9PFZ2_HUMAN;H7C5R1|H7C5R1_HUMAN;P00450|CERU_HUMAN			FALSE
RTHLPEVFLSK	59.38	1325.75	11	1.5	442.922	3	19.5556	684000	4550000	3775	20210614_HS_50ng_F1-2.raw	3	P02774|VTDB_HUMAN;D6RF35|D6RF35_HUMAN			FALSE
RTVAAPSVFIFPPSDEQLK	49.36	2101.12	19	1	701.381	3	25.6026	4330000	10900000	6171	20210614_HS_50ng_F2-2.raw	5	P01834|IGKC_HUMAN			FALSE
RVDTVDPPYPR	60.1	1313.67	11	-1.7	438.897	3	12.9946	1060000	2270000	2304	20210614_HS_50ng_F1-3b.raw	5	P04004|VTNC_HUMAN			FALSE
RYTIAALLSPYSYSTTAVVTNPK	44.02	2515.33	23	0.3	839.452	3	26.3092	33700	482000	7216	20210614_HS_50ng_F2-1.raw	1	P02766|TTHY_HUMAN;A0A087WT59|A0A087WT59_HUMAN			FALSE
SASDLTWD(+21.98)NLK	50.02	1270.58	11	-0.9	636.297	2	18.5618	823000	5280000	4560	20210614_HS_50ng_F2-1.raw	2	H7C5E8|H7C5E8_HUMAN;P02787|TRFE_HUMAN	Sodium adduct	D8:Sodium adduct:42.68	FALSE
SASDLTWDNLK	63.4	1248.6	11	-7.5	625.302	2	19.0104	38300000	232000000	3919	20210614_HS_50ng_F3-3.raw	23	H7C5E8|H7C5E8_HUMAN;P02787|TRFE_HUMAN			FALSE
SASLHLPK	54.45	851.486	8	-1.5	426.75	2	7.3321	5720000	12000000	1455	20210614_HS_50ng_F1-1.raw	6				FALSE
SASNM(+15.99)AIVDVK	30.5	1149.57	11	4.5	575.795	2	6.434	8420000	12200000	1217	20210614_HS_50ng_F2-1.raw	2	P01023|A2MG_HUMAN	Oxidation (M)		FALSE
SAVTALWGK	44.48	931.513	9	1.2	466.764	2	18.304			4230	20210614_HS_50ng_F2-3.raw	1	F8W6P5|F8W6P5_HUMAN;P68871|HBB_HUMAN;A0A2R8Y7R2|A0A2R8Y7R2_HUMAN			FALSE
SC(+57.02)AVAEYGVYVK	69.11	1344.64	12	-1.1	673.326	2	17.9974	35300000	330000000	4176	20210614_HS_50ng_F2-2.raw	19	P00738|HPT_HUMAN;A0A0A0MRD9|A0A0A0MRD9_HUMAN;J3QLC9|J3QLC9_HUMAN;A0A087WU08|A0A087WU08_HUMAN;H0Y300|H0Y300_HUMAN;A0A0C4DGL8|A0A0C4DGL8_HUMAN;J3QR68|J3QR68_HUMAN;P00739|HPTR_HUMAN	Carbamidomethylation	C2:Carbamidomethylation:1000.00	FALSE
SC(+57.02)DNPYIPN(+0.98)GDYSPLR	58.21	1867.8	16	0.6	934.91	2	20.3588	567000	4080000	4391	20210614_HS_50ng_F4-1.raw	3	A0A0D9SG88|A0A0D9SG88_HUMAN;P08603|CFAH_HUMAN;Q5TFM2|Q5TFM2_HUMAN	Carbamidomethylation; Deamidation (NQ)	C2:Carbamidomethylation:1000.00;N9:Deamidation (NQ):56.99	FALSE
SC(+57.02)DNPYIPNGDYSPLR	64.53	1866.82	16	0.5	934.418	2	20.4138	36900	618000	4343	20210614_HS_50ng_F3-3.raw	2	A0A0D9SG88|A0A0D9SG88_HUMAN;P08603|CFAH_HUMAN;Q5TFM2|Q5TFM2_HUMAN	Carbamidomethylation	C2:Carbamidomethylation:1000.00	FALSE
SC(+57.02)DTPPPC(+57.02)PR	58.68	1185.49	10	-3	593.751	2	5.3478	478000	1280000	867	20210614_HS_50ng_F2-2.raw	2	A0A4W9A917|A0A4W9A917_HUMAN;P01860|IGHG3_HUMAN;A0A286YES1|A0A286YES1_HUMAN	Carbamidomethylation; Carbamidomethylation	C2:Carbamidomethylation:1000.00;C8:Carbamidomethylation:1000.00	FALSE
SC(+57.02)ESNSPFPVHPGTAEC(+57.02)C(+57.02)TK	80.68	2263.93	20	0	755.65	3	16.6369	2000000	18000000	3645	20210614_HS_50ng_F2-3.raw	2	D6RBJ7|D6RBJ7_HUMAN;P02774|VTDB_HUMAN;D6RF20|D6RF20_HUMAN;D6RF35|D6RF35_HUMAN	Carbamidomethylation; Carbamidomethylation; Carbamidomethylation	C2:Carbamidomethylation:1000.00;C17:Carbamidomethylation:1000.00;C18:Carbamidomethylation:1000.00	FALSE
SC(+57.02)VGETTESTQC(+57.02)EDEELEHLR	72.02	2508.04	21	0.8	837.021	3	18.3098	614000	6630000	4105	20210614_HS_50ng_F2-2.raw	3	P10643|CO7_HUMAN	Carbamidomethylation; Carbamidomethylation	C2:Carbamidomethylation:1000.00;C12:Carbamidomethylation:1000.00	FALSE
SDDKVTLEER	35.31	1190.58	10	2.5	596.296	2	6.3077	564000	698000	1011	20210614_HS_50ng_F1-2.raw	2	P01024|CO3_HUMAN;M0QXZ3|M0QXZ3_HUMAN			FALSE
SDDTAVYYC(+57.02)AR	57.86	1319.55	11	-3.6	660.778	2	8.6235	347000	1330000	1619	20210614_HS_50ng_F3-2.raw	2	P23083|HV102_HUMAN	Carbamidomethylation	C9:Carbamidomethylation:1000.00	FALSE
SDVGFLPPFPTLDPEEK	42.84	1886.93	17	0.3	944.473	2	27.4413	254000	1940000	6314	20210614_HS_50ng_F4-1.raw	2	P43652|AFAM_HUMAN			FALSE
SDVM(+15.99)YTDWK	53.36	1159.49	9	1.2	580.751	2	11.4834	7150000	33100000	2697	20210614_HS_50ng_F2-1.raw	8	P19652|A1AG2_HUMAN	Oxidation (M)		FALSE
SDVVYTDWK	53.32	1111.52	9	1.8	556.768	2	16.6709	13300000	74700000	3553	20210614_HS_50ng_F2-2.raw	14	P02763|A1AG1_HUMAN			FALSE
SEETKENEGFTVTAEGK	46.74	1854.85	17	-1.5	619.289	3	11.6108	779000	3490000	2283	20210614_HS_50ng_F2-3.raw	2	P01024|CO3_HUMAN;M0QYC8|M0QYC8_HUMAN			FALSE
SEGSSVNLSPPLEQC(+57.02)VPDR	23.94	2069.97	19	-0.7	1035.99	2	19.9873	146000	1380000	3830	20210614_HS_50ng_F4-3.raw	1	C9JV37|C9JV37_HUMAN;P00734|THRB_HUMAN;E9PIT3|E9PIT3_HUMAN	Carbamidomethylation	C15:Carbamidomethylation:1000.00	FALSE
SEILAHWSPAK	63.99	1237.65	11	4	619.831	2	18.3247	208000	1750000	3519	20210614_HS_50ng_F1-2.raw	3	P04114|APOB_HUMAN			FALSE
SELEEQLTPVAEETR	67.19	1729.84	15	0.9	865.927	2	18.7943	1430000	14200000	3322	20210614_HS_50ng_F4-2.raw	7	E7ERP7|E7ERP7_HUMAN;E9PEV4|E9PEV4_HUMAN;P02649|APOE_HUMAN;H0Y7L5|H0Y7L5_HUMAN			FALSE
SELTQQLNALFQDK	64.77	1633.83	14	4	817.926	2	25.5065	117000	1290000	5893	20210614_HS_50ng_F3-3.raw	2	P06727|APOA4_HUMAN			FALSE
SEYQADYESLR	53.94	1359.59	11	-4.3	680.802	2	14.7557	1550000	8190000	2723	20210614_HS_50ng_F3-3.raw	4	P04114|APOB_HUMAN			FALSE
SGAQATWTELPWPHEK	67.88	1836.88	16	1.9	919.449	2	23.2777	9650000	62600000	5948	20210614_HS_50ng_F2-3.raw	8	P02790|HEMO_HUMAN			FALSE
SGFSFGFK	57.37	875.418	8	3.3	438.718	2	21.1009	96300	907000	4976	20210614_HS_50ng_F2-2.raw	2	F5GY80|F5GY80_HUMAN;P07358|CO8B_HUMAN;F5H7G1|F5H7G1_HUMAN			FALSE
SGGGFSSGSAGIINYQR	66.33	1656.79	17	-0.9	829.399	2	17.893	211000	1960000	3690	20210614_HS_50ng_F3-1.raw	2	#CONTAM#cont|000132|;#CONTAM#cont|000135|;#CONTAM#cont|000134|;P04264|K2C1_HUMAN			FALSE
SGIPIVTSPYQIHFTK	71.95	1786.96	16	-2.2	596.66	3	24.5945	12500000	135000000	5978	20210614_HS_50ng_F2-2.raw	11	P01024|CO3_HUMAN			FALSE
SGLSTGWTQLSK	50.63	1263.65	12	1.1	632.831	2	18.4593	6110000	46500000	4524	20210614_HS_50ng_F2-1.raw	6	P04217|A1BG_HUMAN;M0R009|M0R009_HUMAN			FALSE
SGQSEDRQPVPGQQM(+15.99)TLK	48.81	2000.96	18	-3.5	667.991	3	7.0153	462000	5020000	1303	20210614_HS_50ng_F2-2.raw	2	P01024|CO3_HUMAN	Oxidation (M)		FALSE
SGSDEVQVGQQR	47.71	1288.6	12	-2.3	645.306	2	6.7214	241000	733000	1201	20210614_HS_50ng_F3-2.raw	4	P01024|CO3_HUMAN;M0QXZ3|M0QXZ3_HUMAN			FALSE
SGSSTASWIQNVDTK	69.17	1579.75	15	1.1	790.882	2	18.1948	1160000	8320000	3634	20210614_HS_50ng_F3-3.raw	3	P04114|APOB_HUMAN			FALSE
SGTASVVC(+57.02)LLN(+0.98)NFYPR	69.86	1797.87	16	5	899.948	2	28.0539	13700000	148000000	6406	20210614_HS_50ng_F3-3.raw	19	A0A5H1ZRQ3|A0A5H1ZRQ3_HUMAN;P01834|IGKC_HUMAN	Carbamidomethylation; Deamidation (NQ)	C8:Carbamidomethylation:1000.00;N11:Deamidation (NQ):17.01	FALSE
SGTASVVC(+57.02)LLNN(+0.98)FYPR	67.23	1797.87	16	1.1	600.299	3	25.913	3540000	16400000	5985	20210614_HS_50ng_F3-3.raw	5	A0A5H1ZRQ3|A0A5H1ZRQ3_HUMAN;P01834|IGKC_HUMAN	Carbamidomethylation; Deamidation (NQ)	C8:Carbamidomethylation:1000.00;N12:Deamidation (NQ):17.01	FALSE
SGTASVVC(+57.02)LLNNFYPR	74.28	1796.89	16	-3.4	899.448	2	27.3775	29300000	245000000	6288	20210614_HS_50ng_F3-3.raw	14	A0A5H1ZRQ3|A0A5H1ZRQ3_HUMAN;P01834|IGKC_HUMAN	Carbamidomethylation	C8:Carbamidomethylation:1000.00	FALSE
SGTSASLAISGLR	71.65	1218.66	13	1.6	610.337	2	18.2266	7000000	34000000	3652	20210614_HS_50ng_F3-3.raw	6				FALSE
SHC(+57.02)IAEVEN(+0.98)DEM(+15.99)PADLPSLAADFVESK	76.93	2990.32	27	2.4	997.782	3	26.7533	7670000	88500000	5746	20210614_HS_50ng_F3-2.raw	3	A0A0C4DGB6|A0A0C4DGB6_HUMAN;P02768|ALBU_HUMAN;C9JKR2|C9JKR2_HUMAN;D6RHD5|D6RHD5_HUMAN;B7WNR0|B7WNR0_HUMAN;H0YA55|H0YA55_HUMAN	Carbamidomethylation; Deamidation (NQ); Oxidation (M)	C3:Carbamidomethylation:1000.00	FALSE
SHC(+57.02)IAEVEND(+21.98)EM(+15.99)PADLPSLAADFVESK	41.02	3011.31	27	0.3	1004.78	3	25.8061	39400	1120000	7071	20210614_HS_50ng_F2-1.raw	1	A0A0C4DGB6|A0A0C4DGB6_HUMAN;P02768|ALBU_HUMAN;C9JKR2|C9JKR2_HUMAN;D6RHD5|D6RHD5_HUMAN;B7WNR0|B7WNR0_HUMAN;H0YA55|H0YA55_HUMAN	Carbamidomethylation; Sodium adduct; Oxidation (M)	C3:Carbamidomethylation:1000.00;D10:Sodium adduct:0.00;M12:Oxidation (M):1000.00	FALSE
SHC(+57.02)IAEVENDE(+21.98)M(+15.99)PADLPSLAADFVESK	84.15	3011.31	27	-0.4	753.835	4	26.097	1060000	7560000	6022	20210614_HS_50ng_F3-3.raw	2	A0A0C4DGB6|A0A0C4DGB6_HUMAN;P02768|ALBU_HUMAN;C9JKR2|C9JKR2_HUMAN;D6RHD5|D6RHD5_HUMAN;B7WNR0|B7WNR0_HUMAN;H0YA55|H0YA55_HUMAN	Carbamidomethylation; Sodium adduct; Oxidation (M)	C3:Carbamidomethylation:1000.00;E11:Sodium adduct:0.00;M12:Oxidation (M):1000.00	FALSE
SHC(+57.02)IAEVENDEM(+15.99)PADLPSLAADFVESK	124.56	2989.33	27	-1	997.45	3	26.105	26800000	287000000	4327	20210614_HS_50ng_F5-3.raw	31	A0A0C4DGB6|A0A0C4DGB6_HUMAN;P02768|ALBU_HUMAN;C9JKR2|C9JKR2_HUMAN;D6RHD5|D6RHD5_HUMAN;B7WNR0|B7WNR0_HUMAN;H0YA55|H0YA55_HUMAN	Carbamidomethylation; Oxidation (M)	C3:Carbamidomethylation:1000.00	FALSE
SIAQYWLGC(+57.02)PAPGHL	52.22	1668.81	15	5.2	835.416	2	25.2396	685000	4830000	5818	20210614_HS_50ng_F3-3.raw	4	P04004|VTNC_HUMAN	Carbamidomethylation	C9:Carbamidomethylation:1000.00	FALSE
SIDVAC(+57.02)HPGYALPK	43.3	1526.76	14	2.4	509.927	3	18.2951	996000	9980000	4219	20210614_HS_50ng_F2-3.raw	3	A0A0D9SG88|A0A0D9SG88_HUMAN;P08603|CFAH_HUMAN;Q5TFM2|Q5TFM2_HUMAN	Carbamidomethylation	C6:Carbamidomethylation:1000.00	FALSE
SIEVFGQFN(+0.98)GK	51.59	1225.6	11	1.4	613.807	2	20.2978	489000	7120000	4293	20210614_HS_50ng_F3-3.raw	5	P02748|CO9_HUMAN	Deamidation (NQ)	N9:Deamidation (NQ):32.28	FALSE
SISTAYLQWSSLK	49.01	1482.77	13	-1	742.393	2	23.4731	111000	1430000	5551	20210614_HS_50ng_F3-1.raw	2	A0A0C4DH38|HV551_HUMAN			FALSE
SITC(+57.02)IHGVWTQLPQC(+57.02)VAIDK	36.6	2325.16	20	2.3	776.063	3	24.2852	66400	1090000	6609	20210614_HS_50ng_F2-1.raw	1	P08603|CFAH_HUMAN	Carbamidomethylation; Carbamidomethylation	C4:Carbamidomethylation:1000.00;C15:Carbamidomethylation:1000.00	FALSE
SKEFQLFSSPHGK	49.37	1490.75	13	-1.2	497.924	3	17.553	2080000	8540000	3434	20210614_HS_50ng_F1-3b.raw	3	P02787|TRFE_HUMAN			FALSE
SKLPGIVAEGR	40.96	1125.65	11	1.2	563.833	2	14.0905	342000	1320000	2573	20210614_HS_50ng_F1-3b.raw	3	P01008|ANT3_HUMAN			FALSE
SLDFTELDVAAEK	62.22	1436.7	13	1.2	719.36	2	21.9749	1490000	13500000	5023	20210614_HS_50ng_F3-1.raw	4	P01019|ANGT_HUMAN			FALSE
SLDLDSIIAEVK	58.5	1301.71	12	1.4	651.862	2	26.2624	2160000	18500000	6805	20210614_HS_50ng_F2-3.raw	4	#CONTAM#cont|000132|;#CONTAM#cont|000135|;#CONTAM#cont|000134|;P04264|K2C1_HUMAN			FALSE
SLGEC(+57.02)C(+57.02)DVEDSTTC(+57.02)FNAK	85.71	2091.82	18	0.3	1046.92	2	17.0481	176000	2220000	3106	20210614_HS_50ng_F4-3.raw	3	P02774|VTDB_HUMAN;D6RF35|D6RF35_HUMAN	Carbamidomethylation; Carbamidomethylation; Carbamidomethylation	C5:Carbamidomethylation:1000.00;C6:Carbamidomethylation:1000.00;C14:Carbamidomethylation:1000.00	FALSE
SLHTLFGD(+21.98)K	35.12	1038.51	9	-4.6	520.26	2	14.4504	5530000	11800000	3060	20210614_HS_50ng_F1-1.raw	3	A0A0C4DGB6|A0A0C4DGB6_HUMAN;A0A087WWT3|A0A087WWT3_HUMAN;P02768|ALBU_HUMAN;H7C013|H7C013_HUMAN	Sodium adduct	D8:Sodium adduct:20.92	FALSE
SLHTLFGDK	69.14	1016.53	9	-3	509.269	2	15.6962	275000000	1000000000	2944	20210614_HS_50ng_F1-2.raw	91	A0A0C4DGB6|A0A0C4DGB6_HUMAN;A0A087WWT3|A0A087WWT3_HUMAN;P02768|ALBU_HUMAN;H7C013|H7C013_HUMAN			FALSE
SLHTLFGDKLC(+57.02)TVATLR	74.09	1931.03	17	0.4	483.765	4	23.4971	204000	1950000	5199	20210614_HS_50ng_F1-1.raw	2	A0A0C4DGB6|A0A0C4DGB6_HUMAN;A0A087WWT3|A0A087WWT3_HUMAN;P02768|ALBU_HUMAN;H7C013|H7C013_HUMAN	Carbamidomethylation	C11:Carbamidomethylation:1000.00	FALSE
SLM(+15.99)LHYEFLQR	47.51	1451.72	11	0.1	484.915	3	21.7492	140000	1180000	4770	20210614_HS_50ng_F1-1.raw	2	F5GY80|F5GY80_HUMAN;P07358|CO8B_HUMAN;F5H7G1|F5H7G1_HUMAN	Oxidation (M)		FALSE
SLN(+0.98)NQFASFIDK	35.85	1383.67	12	2.7	692.843	2	22.3807	26800	341000	4672	20210614_HS_50ng_F3-2.raw	1	#CONTAM#cont|000132|;#CONTAM#cont|000135|;#CONTAM#cont|000134|;P04264|K2C1_HUMAN	Deamidation (NQ)	N3:Deamidation (NQ):0.00	FALSE
SLNNQFASFIDK	56.76	1382.68	12	-0.3	692.349	2	21.8507	2400000	29400000	5008	20210614_HS_50ng_F3-1.raw	8	#CONTAM#cont|000132|;#CONTAM#cont|000135|;#CONTAM#cont|000134|;P04264|K2C1_HUMAN			FALSE
SLPEGVAN(+0.98)GIEVYSTK	47.49	1663.83	16	-0.3	832.922	2	19.6855	73300	1130000	4101	20210614_HS_50ng_F3-3.raw	2	E7ET33|E7ET33_HUMAN;A0A087WW43|A0A087WW43_HUMAN;Q06033|ITIH3_HUMAN	Deamidation (NQ)		FALSE
SLPVSDSVLSGFEQR	62.97	1619.82	15	4.7	810.919	2	23.5143	875000	8020000	4963	20210614_HS_50ng_F3-2.raw	3	P07360|CO8G_HUMAN			FALSE
SLVNLGGSK	43.05	873.492	9	-1.4	437.753	2	11.8371	547000	1330000	2340	20210614_HS_50ng_F2-3.raw	3	#CONTAM#cont|000132|;#CONTAM#cont|000135|;#CONTAM#cont|000134|;P04264|K2C1_HUMAN			FALSE
SLWDFLK	42.61	907.48	7	-1.1	454.747	2	26.4136	496000	3540000	6392	20210614_HS_50ng_F2-2.raw	3	P04114|APOB_HUMAN			FALSE
SNLDED(+21.98)IIAEENIVSR	68.64	1837.87	16	-0.2	613.63	3	22.1027	821000	7580000	4934	20210614_HS_50ng_F4-1.raw	4	P01024|CO3_HUMAN	Sodium adduct	D6:Sodium adduct:8.69	FALSE
SNLDEDIIAEENIVSR	72.43	1815.88	16	0.9	908.951	2	22.2354	15000000	136000000	4963	20210614_HS_50ng_F3-3.raw	17	P01024|CO3_HUMAN			FALSE
SPAFTDLHLR	56.87	1155.6	10	3	578.811	2	19.1479	607000	4580000	3856	20210614_HS_50ng_F1-3b.raw	3	P04114|APOB_HUMAN			FALSE
SPDVIN(+0.98)GSPISQK	60.06	1341.68	13	-5.9	671.842	2	14.2196	5310000	26400000	2735	20210614_HS_50ng_F3-3.raw	15	A0A0D9SG88|A0A0D9SG88_HUMAN;P08603|CFAH_HUMAN;Q5TFM2|Q5TFM2_HUMAN	Deamidation (NQ)	N6:Deamidation (NQ):36.87	FALSE
SPEQQE(+21.98)TVLDGNLIIR	65.04	1832.92	16	1.6	611.983	3	21.9704	205000	1720000	5017	20210614_HS_50ng_F3-1.raw	1	Q14624|ITIH4_HUMAN;B7ZKJ8|B7ZKJ8_HUMAN;H7C0L5|H7C0L5_HUMAN	Sodium adduct	E6:Sodium adduct:13.38	FALSE
SPEQQETVLDGNLIIR	71.83	1810.94	16	1.6	906.48	2	22.1611	4160000	29300000	4907	20210614_HS_50ng_F3-3.raw	7	Q14624|ITIH4_HUMAN;B7ZKJ8|B7ZKJ8_HUMAN;H7C0L5|H7C0L5_HUMAN			FALSE
SPPEISHGVVAHM(+15.99)SDSYQYGEEVTYK	58.12	2925.31	26	-0.9	732.335	4	18.6749	1160000	14500000	4349	20210614_HS_50ng_F2-3.raw	5	P08603|CFAH_HUMAN	Oxidation (M)		FALSE
SPQELLC(+57.02)GASLISDR	59.26	1644.81	15	1.8	823.416	2	22.0972	745000	7200000	5055	20210614_HS_50ng_F3-1.raw	3	P00734|THRB_HUMAN;E9PIT3|E9PIT3_HUMAN	Carbamidomethylation	C7:Carbamidomethylation:1000.00	FALSE
SPVGVQPILN(+0.98)EHTFC(+57.02)AGM(+15.99)SK	67.01	2188.03	20	4.5	730.354	3	20.8372	131000	873000	5115	20210614_HS_50ng_F2-3.raw	4	P00738|HPT_HUMAN;J3QLC9|J3QLC9_HUMAN;A0A087WU08|A0A087WU08_HUMAN;H0Y300|H0Y300_HUMAN;A0A0C4DGL8|A0A0C4DGL8_HUMAN;J3QR68|J3QR68_HUMAN	Deamidation (NQ); Carbamidomethylation; Oxidation (M)	N10:Deamidation (NQ):61.69;C15:Carbamidomethylation:1000.00;M18:Oxidation (M):1000.00	FALSE
SPVGVQPILNE(+21.98)HTFC(+57.02)AGM(+15.99)SK	56.28	2209.03	20	1.7	737.351	3	20.6139	534000	6070000	5295	20210614_HS_50ng_F2-1.raw	3	P00738|HPT_HUMAN;J3QLC9|J3QLC9_HUMAN;A0A087WU08|A0A087WU08_HUMAN;H0Y300|H0Y300_HUMAN;A0A0C4DGL8|A0A0C4DGL8_HUMAN;J3QR68|J3QR68_HUMAN	Sodium adduct; Carbamidomethylation; Oxidation (M)	E11:Sodium adduct:58.98;C15:Carbamidomethylation:1000.00;M18:Oxidation (M):1000.00	FALSE
SPVGVQPILNEHTFC(+57.02)AGM(+15.99)SK	72.44	2187.05	20	-0.2	1094.53	2	20.5962	15900000	152000000	5293	20210614_HS_50ng_F2-1.raw	15	P00738|HPT_HUMAN;J3QLC9|J3QLC9_HUMAN;A0A087WU08|A0A087WU08_HUMAN;H0Y300|H0Y300_HUMAN;A0A0C4DGL8|A0A0C4DGL8_HUMAN;J3QR68|J3QR68_HUMAN	Carbamidomethylation; Oxidation (M)	C15:Carbamidomethylation:1000.00	FALSE
SPVGVQPILNEHTFC(+57.02)AGMSK	25.77	2171.05	20	4.7	724.694	3	22.1739	17100	284000	5590	20210614_HS_50ng_F2-3.raw	1	P00738|HPT_HUMAN;J3QLC9|J3QLC9_HUMAN;A0A087WU08|A0A087WU08_HUMAN;H0Y300|H0Y300_HUMAN;A0A0C4DGL8|A0A0C4DGL8_HUMAN;J3QR68|J3QR68_HUMAN	Carbamidomethylation	C15:Carbamidomethylation:1000.00	FALSE
SQYEQLAEQNR	48.28	1364.63	11	-7.1	683.318	2	7.6994	27000	411000	1500	20210614_HS_50ng_F2-3.raw	1	#CONTAM#cont|000133|;#CONTAM#cont|000131|;P13645|K1C10_HUMAN;#CONTAM#cont|000129|;#CONTAM#cont|000136|;#CONTAM#cont|000122|;#CONTAM#cont|000130|			FALSE
SSALDM(+15.99)ENFR	56.68	1184.51	10	1.5	593.265	2	11.3962	4860000	15500000	2243	20210614_HS_50ng_F2-3.raw	4	Q5T985|Q5T985_HUMAN;Q5T987|Q5T987_HUMAN;P19823|ITIH2_HUMAN	Oxidation (M)		FALSE
SSEDPNEDIVER	45.76	1388.61	12	2.7	695.312	2	7.0178	308000	2160000	1298	20210614_HS_50ng_F3-3.raw	2				FALSE
SSGLVSNAPGVQIR	63.54	1383.75	14	0.7	692.881	2	18.1088	128000	1580000	3513	20210614_HS_50ng_F3-2.raw	3				FALSE
SSGSLLN(+0.98)NAIK	61.15	1103.58	11	6.8	552.802	2	15.7267	1680000	6680000	3640	20210614_HS_50ng_F2-1.raw	4	P01023|A2MG_HUMAN;P20742|PZP_HUMAN	Deamidation (NQ)	N7:Deamidation (NQ):12.28	FALSE
SSGSLLNN(+0.98)AIK	61.05	1103.58	11	1.9	552.799	2	15.99	1040000	7030000	3386	20210614_HS_50ng_F2-2.raw	3	P01023|A2MG_HUMAN;P20742|PZP_HUMAN	Deamidation (NQ)	N8:Deamidation (NQ):17.01	FALSE
SSGSLLNNAIK	66.42	1102.6	11	1.6	552.307	2	14.2232	18600000	116000000	3322	20210614_HS_50ng_F2-1.raw	9	P01023|A2MG_HUMAN;P20742|PZP_HUMAN			FALSE
SSLSVPYVIVPLK	57.37	1400.83	13	0.4	701.422	2	25.8889	4280000	39100000	5361	20210614_HS_50ng_F4-3.raw	9	P01024|CO3_HUMAN			FALSE
SSNLIILEEHLK	64.66	1394.78	12	2.6	465.933	3	22.3757	1910000	14000000	4416	20210614_HS_50ng_F1-2.raw	3	P08603|CFAH_HUMAN			FALSE
SSSNEE(+21.98)VM(+15.99)FLTVQVK	50.65	1734.81	15	-1.7	579.277	3	21.5838	179000	1930000	4738	20210614_HS_50ng_F3-3.raw	2	P01023|A2MG_HUMAN;F8W7L3|F8W7L3_HUMAN	Sodium adduct; Oxidation (M)	E6:Sodium adduct:0.00;M8:Oxidation (M):1000.00	FALSE
SSSNEEVM(+15.99)FLTVQVK	66.29	1712.83	15	1.5	857.423	2	22.1613	6590000	62000000	4611	20210614_HS_50ng_F3-2.raw	7	P01023|A2MG_HUMAN;F8W7L3|F8W7L3_HUMAN	Oxidation (M)		FALSE
STSE(+21.98)STAALGC(+57.02)LVK	39.02	1444.68	14	-2.9	482.567	3	18.3067	693000	5800000	3684	20210614_HS_50ng_F3-3.raw	3	P01859|IGHG2_HUMAN;A0A286YEY4|A0A286YEY4_HUMAN	Sodium adduct; Carbamidomethylation	E4:Sodium adduct:36.11;C11:Carbamidomethylation:1000.00	FALSE
STSESTAALGC(+57.02)LVK	65.24	1422.7	14	0.7	712.359	2	18.755	11300000	83300000	3860	20210614_HS_50ng_F3-3.raw	16	P01859|IGHG2_HUMAN;A0A286YEY4|A0A286YEY4_HUMAN	Carbamidomethylation	C11:Carbamidomethylation:1000.00	FALSE
STSGGTAALGC(+57.02)LVK	63.67	1320.67	14	0.2	661.343	2	17.5411	54300000	233000000	4228	20210614_HS_50ng_F2-1.raw	31	A0A4W9A917|A0A4W9A917_HUMAN;P01857|IGHG1_HUMAN;P01860|IGHG3_HUMAN;A0A0A0MS08|A0A0A0MS08_HUMAN;A0A0A0MS07|A0A0A0MS07_HUMAN;A0A286YES1|A0A286YES1_HUMAN	Carbamidomethylation	C11:Carbamidomethylation:1000.00	FALSE
STSTAYM(+15.99)ELSSLR	47.61	1460.68	13	-0.7	731.348	2	19.2805	256000	3320000	3808	20210614_HS_50ng_F3-2.raw	3		Oxidation (M)		FALSE
SVGFHLPSR	44.74	998.53	9	0.6	500.272	2	17.2797	57600	389000	3359	20210614_HS_50ng_F1-3b.raw	1	P04114|APOB_HUMAN			FALSE
SVIPSD(+21.98)GPSVAC(+57.02)VK	47.1	1436.69	14	-2.4	719.353	2	17.5676	1140000	9150000	3452	20210614_HS_50ng_F3-3.raw	2	F8WCI6|F8WCI6_HUMAN;P02787|TRFE_HUMAN;F8WEK9|F8WEK9_HUMAN;C9JB55|C9JB55_HUMAN	Sodium adduct; Carbamidomethylation	D6:Sodium adduct:31.91;C12:Carbamidomethylation:1000.00	FALSE
SVIPSDGPSVAC(+57.02)VK	68.88	1414.71	14	-0.1	708.364	2	17.8194	14100000	81400000	3919	20210614_HS_50ng_F2-2.raw	26	F8WCI6|F8WCI6_HUMAN;P02787|TRFE_HUMAN;F8WEK9|F8WEK9_HUMAN;C9JB55|C9JB55_HUMAN	Carbamidomethylation	C12:Carbamidomethylation:1000.00	FALSE
SVLGQLGITK	51.35	1014.61	10	-3.8	508.309	2	19.3714	93800000	974000000	4846	20210614_HS_50ng_F2-1.raw	26				FALSE
SVNDLYIQK	52.09	1078.57	9	-1.7	540.289	2	12.8532	1130000	3190000	2607	20210614_HS_50ng_F2-2.raw	2	P05546|HEP2_HUMAN			FALSE
SVPPSASHVAPTETFTYEWTVPK	34.13	2530.24	23	2.6	844.422	3	23.5346	3470000	15500000	6334	20210614_HS_50ng_F2-1.raw	3	E9PFZ2|E9PFZ2_HUMAN;H7C5R1|H7C5R1_HUMAN;P00450|CERU_HUMAN			FALSE
SVSDGIAALDLNAVANK	32.32	1656.87	17	2.1	829.443	2	23.0077	317000	3180000	4838	20210614_HS_50ng_F3-2.raw	1	P04114|APOB_HUMAN			FALSE
SVSLPSLDPASAK	65.11	1270.68	13	0.2	636.346	2	19.8339	1150000	10100000	4140	20210614_HS_50ng_F3-3.raw	3	A8MUN2|A8MUN2_HUMAN;P04114|APOB_HUMAN			FALSE
SYSC(+57.02)QVTHEGSTVEK	60.99	1710.75	15	-4.8	856.379	2	6.2944	30100000	141000000	1184	20210614_HS_50ng_F2-2.raw	10	P0DOY2|IGLC2_HUMAN;A0A0B4J231|A0A0B4J231_HUMAN;P0DOY3|IGLC3_HUMAN;B9A064|IGLL5_HUMAN	Carbamidomethylation	C4:Carbamidomethylation:1000.00	FALSE
SYTITGLQPGTDYK	46.8	1542.76	14	1.2	772.386	2	19.5575	81500	1350000	3889	20210614_HS_50ng_F3-2.raw	2	P02751|FINC_HUMAN;H0Y7Z1|H0Y7Z1_HUMAN			FALSE
SYTVAIAGYALAQM(+15.99)GR	57.69	1686.84	16	4.4	844.431	2	21.9611	1020000	8090000	5000	20210614_HS_50ng_F3-1.raw	5	M0R0Q9|M0R0Q9_HUMAN;P01024|CO3_HUMAN	Oxidation (M)		FALSE
TAAENDFVTLK	53.28	1207.61	11	1.2	604.812	2	16.0121	1050000	4900000	3727	20210614_HS_50ng_F2-1.raw	5	P35908|K22E_HUMAN			FALSE
TAGWNIPM(+15.99)GLLYNK	62.42	1592.8	14	-0.3	797.408	2	25.107	20000000	274000000	5318	20210614_HS_50ng_F3-2.raw	19	H7C5E8|H7C5E8_HUMAN;P02787|TRFE_HUMAN	Oxidation (M)		FALSE
TATSEYQ(+0.98)TFFNPR	43.52	1561.7	13	-2.6	781.858	2	20.3082	20500	440000	4324	20210614_HS_50ng_F3-3.raw	1	C9JV37|C9JV37_HUMAN;P00734|THRB_HUMAN;E9PIT3|E9PIT3_HUMAN	Deamidation (NQ)	Q7:Deamidation (NQ):61.69	FALSE
TATSEYQTFFNPR	61.94	1560.72	13	2.1	781.369	2	20.3777	379000	3870000	4324	20210614_HS_50ng_F3-3.raw	3	C9JV37|C9JV37_HUMAN;P00734|THRB_HUMAN;E9PIT3|E9PIT3_HUMAN			FALSE
TC(+57.02)PKPDDLPFSTVVPLK	54.59	1913	17	-1	638.672	3	24.5563	1810000	17800000	5973	20210614_HS_50ng_F2-2.raw	3	J3QRN2|J3QRN2_HUMAN;P02749|APOH_HUMAN	Carbamidomethylation	C2:Carbamidomethylation:1000.00	FALSE
TC(+57.02)VAD(+21.98)ESAEN(+0.98)C(+57.02)DK	36.23	1520.54	13	9.7	761.283	2	5.2396	143000	288000	925	20210614_HS_50ng_F3-2.raw	1	A0A0C4DGB6|A0A0C4DGB6_HUMAN;A0A087WWT3|A0A087WWT3_HUMAN;P02768|ALBU_HUMAN;H7C013|H7C013_HUMAN	Carbamidomethylation; Sodium adduct; Deamidation (NQ); Carbamidomethylation	C2:Carbamidomethylation:1000.00;D5:Sodium adduct:14.02;N10:Deamidation (NQ):1000.00;C11:Carbamidomethylation:1000.00	FALSE
TC(+57.02)VAD(+21.98)ESAENC(+57.02)DK	65.66	1519.55	13	3	760.786	2	4.7369	691000	1840000	863	20210614_HS_50ng_F3-3.raw	5	A0A0C4DGB6|A0A0C4DGB6_HUMAN;A0A087WWT3|A0A087WWT3_HUMAN;P02768|ALBU_HUMAN;H7C013|H7C013_HUMAN	Carbamidomethylation; Sodium adduct; Carbamidomethylation	C2:Carbamidomethylation:1000.00;D5:Sodium adduct:9.86;C11:Carbamidomethylation:1000.00	FALSE
TC(+57.02)VADESAEN(+0.98)C(+57.02)DK	40.45	1498.56	13	5.4	750.289	2	6.5036	504000	1390000	1156	20210614_HS_50ng_F3-2.raw	3	A0A0C4DGB6|A0A0C4DGB6_HUMAN;A0A087WWT3|A0A087WWT3_HUMAN;P02768|ALBU_HUMAN;H7C013|H7C013_HUMAN	Carbamidomethylation; Deamidation (NQ); Carbamidomethylation	C2:Carbamidomethylation:1000.00;C11:Carbamidomethylation:1000.00	FALSE
TC(+57.02)VADESAENC(+57.02)DK	90.61	1497.57	13	-2.8	749.791	2	2.9405	8090000	18300000	422	20210614_HS_50ng_F3-2.raw	33	A0A0C4DGB6|A0A0C4DGB6_HUMAN;A0A087WWT3|A0A087WWT3_HUMAN;P02768|ALBU_HUMAN;H7C013|H7C013_HUMAN	Carbamidomethylation; Carbamidomethylation	C2:Carbamidomethylation:1000.00;C11:Carbamidomethylation:1000.00	FALSE
TEDSSSFLIDK	43.01	1240.58	11	-0.7	621.298	2	15.8499	315000	1320000	2985	20210614_HS_50ng_F3-3.raw	3	P05543|THBG_HUMAN			FALSE
TEDTIFLR	55.57	993.513	8	-1.4	497.763	2	17.6422	25700000	229000000	4260	20210614_HS_50ng_F2-1.raw	15	P02763|A1AG1_HUMAN;P19652|A1AG2_HUMAN			FALSE
TEGD(+21.98)GVYTLNDK	34.89	1332.58	12	-3.3	667.295	2	8.6162			1635	20210614_HS_50ng_F3-3.raw	1	P00738|HPT_HUMAN;J3QLC9|J3QLC9_HUMAN;H0Y300|H0Y300_HUMAN;A0A0C4DGL8|A0A0C4DGL8_HUMAN;J3KRH2|J3KRH2_HUMAN;J3QR68|J3QR68_HUMAN;P00739|HPTR_HUMAN	Sodium adduct	D4:Sodium adduct:9.25	FALSE
TEGDGVYTLN(+0.98)DK	34.38	1311.58	12	8.2	656.804	2	12.0478	279000	321000	2263	20210614_HS_50ng_F3-2.raw	1	P00738|HPT_HUMAN;J3QLC9|J3QLC9_HUMAN;H0Y300|H0Y300_HUMAN;A0A0C4DGL8|A0A0C4DGL8_HUMAN;J3KRH2|J3KRH2_HUMAN;J3QR68|J3QR68_HUMAN;P00739|HPTR_HUMAN	Deamidation (NQ)		FALSE
TEGDGVYTLN(+0.98)NEK	37.29	1439.64	13	3.8	720.831	2	11.5282	285000	180000	2138	20210614_HS_50ng_F3-2.raw	1	P00738|HPT_HUMAN;H3BMJ7|H3BMJ7_HUMAN;J3QLC9|J3QLC9_HUMAN;H3BS21|H3BS21_HUMAN;J3KSV1|J3KSV1_HUMAN;J3QQI8|J3QQI8_HUMAN;J3KRH2|J3KRH2_HUMAN	Deamidation (NQ)	N10:Deamidation (NQ):12.28	FALSE
TEGDGVYTLNDK	61.7	1310.6	12	-8	656.302	2	9.1309	9260000	71600000	1804	20210614_HS_50ng_F3-2.raw	28	P00738|HPT_HUMAN;J3QLC9|J3QLC9_HUMAN;H0Y300|H0Y300_HUMAN;A0A0C4DGL8|A0A0C4DGL8_HUMAN;J3KRH2|J3KRH2_HUMAN;J3QR68|J3QR68_HUMAN;P00739|HPTR_HUMAN			FALSE
TEGDGVYTLNNEK	64.18	1438.66	13	-3.4	720.334	2	8.3403	13800000	24000000	1560	20210614_HS_50ng_F3-3.raw	8	P00738|HPT_HUMAN;H3BMJ7|H3BMJ7_HUMAN;J3QLC9|J3QLC9_HUMAN;H3BS21|H3BS21_HUMAN;J3KSV1|J3KSV1_HUMAN;J3QQI8|J3QQI8_HUMAN;J3KRH2|J3KRH2_HUMAN			FALSE
TEHPFTVEEFVLPK	72.89	1671.85	14	1.6	558.292	3	24.6803	21900000	247000000	5993	20210614_HS_50ng_F2-2.raw	16	P01023|A2MG_HUMAN			FALSE
TEHYEEQIEAFK	51.86	1522.69	12	0.9	508.572	3	17.1706	104000	1610000	3837	20210614_HS_50ng_F2-3.raw	1	P02748|CO9_HUMAN			FALSE
TEIDKPSQM(+15.99)QVTDVQDNSISVK	49.03	2477.2	22	2.4	826.741	3	17.2775	144000	1740000	3378	20210614_HS_50ng_F3-3.raw	2	P02751|FINC_HUMAN;H0Y7Z1|H0Y7Z1_HUMAN	Oxidation (M)		FALSE
TELRPGETLNVNFLLR	68.88	1871.03	16	1.1	624.683	3	25.2677	1130000	10400000	6875	20210614_HS_50ng_F2-1.raw	3	P01024|CO3_HUMAN			FALSE
TEQWSTLPPETK	63.92	1415.69	12	-5	708.85	2	16.1687	2320000	5750000	3312	20210614_HS_50ng_F3-1.raw	6	A0A140TA32|A0A140TA32_HUMAN;A0A140TA29|A0A140TA29_HUMAN;P0C0L4|CO4A_HUMAN;P0C0L5|CO4B_HUMAN;A0A0G2JPR0|A0A0G2JPR0_HUMAN;A0A140TA49|A0A140TA49_HUMAN;F5GXS0|F5GXS0_HUMAN;A0A140TA44|A0A140TA44_HUMAN;A0A3B3ISA6|A0A3B3ISA6_HUMAN;A0A0G2JL54|A0A0G2JL54_HUMAN			FALSE
TEVIPPLIENR	58.81	1279.71	11	-2.6	640.862	2	20.5355	4600000	35100000	4566	20210614_HS_50ng_F3-1.raw	9	P04114|APOB_HUMAN			FALSE
TEVNVLPGAK	51.63	1026.57	10	0.2	514.293	2	13.8001	6290000	11400000	2795	20210614_HS_50ng_F2-3.raw	7	Q5T985|Q5T985_HUMAN;Q5T987|Q5T987_HUMAN;P19823|ITIH2_HUMAN			FALSE
TEVSSN(+0.98)HVLIYLDK	51.23	1617.83	14	-0.1	809.92	2	19.6264	29300	533000	4956	20210614_HS_50ng_F2-1.raw	1	P01023|A2MG_HUMAN	Deamidation (NQ)		FALSE
TEVSSNHVLIYLDK	72.47	1616.84	14	3.2	809.43	2	20.4151	16400000	104000000	4759	20210614_HS_50ng_F2-2.raw	11	P01023|A2MG_HUMAN			FALSE
TFISPIK	39.34	804.475	7	2.3	805.484	1	16.6869	467000	3130000	3655	20210614_HS_50ng_F2-3.raw	4	P01024|CO3_HUMAN;M0QXZ3|M0QXZ3_HUMAN			FALSE
TFTC(+57.02)TAAYPESK	64.6	1374.61	12	-1	688.313	2	13.778	6880000	15200000	2494	20210614_HS_50ng_F3-2.raw	15	P01876|IGHA1_HUMAN;A0A286YEY1|A0A286YEY1_HUMAN	Carbamidomethylation	C4:Carbamidomethylation:1000.00	FALSE
TFTPQPPGLER	47.55	1241.64	11	1.4	621.828	2	17.9409	62700	1340000	3985	20210614_HS_50ng_F2-2.raw	2	P35858|ALS_HUMAN			FALSE
TFYEPGEEITYSC(+57.02)KPGYVSR	52.29	2382.08	20	6.9	795.041	3	20.7487	1160000	8250000	4865	20210614_HS_50ng_F2-2.raw	3	J3QRN2|J3QRN2_HUMAN;P02749|APOH_HUMAN	Carbamidomethylation	C13:Carbamidomethylation:1000.00	FALSE
TGAQELLR	43.34	886.487	8	-5	444.249	2	7.8782	210000	863000	1547	20210614_HS_50ng_F2-2.raw	2	A0A0A0MS51|A0A0A0MS51_HUMAN;P06396|GELS_HUMAN;A0A0A0MT01|A0A0A0MT01_HUMAN			FALSE
TGESVEFVC(+57.02)K	38.4	1154.53	10	-0.5	578.271	2	12.4121	496000	1680000	2533	20210614_HS_50ng_F2-2.raw	2	P08603|CFAH_HUMAN	Carbamidomethylation	C9:Carbamidomethylation:1000.00	FALSE
TGISPLALIK	53.94	1011.63	10	2.9	506.825	2	23.052	2130000	16000000	6174	20210614_HS_50ng_F2-1.raw	3	A8MUN2|A8MUN2_HUMAN;P04114|APOB_HUMAN			FALSE
TGLLLLSDPDK	55.82	1170.65	11	-1.7	586.331	2	21.1504	165000	2480000	4574	20210614_HS_50ng_F3-3.raw	3	Q14624|ITIH4_HUMAN;B7ZKJ8|B7ZKJ8_HUMAN;H7C0L5|H7C0L5_HUMAN			FALSE
TGLQEVEVK	51.6	1001.54	9	-4.5	501.775	2	8.8865	18000000	88100000	1861	20210614_HS_50ng_F2-2.raw	15	P01024|CO3_HUMAN			FALSE
THLAPYSDELR	64.74	1300.64	11	-3.1	651.326	2	13.816	18900000	88200000	2724	20210614_HS_50ng_F1-1.raw	33	F8W696|F8W696_HUMAN;P02647|APOA1_HUMAN			FALSE
THLPEVFLSK	65.28	1169.64	10	5.5	585.831	2	20.4022	1760000	12200000	3994	20210614_HS_50ng_F1-2.raw	4	P02774|VTDB_HUMAN;D6RF35|D6RF35_HUMAN			FALSE
THTC(+57.02)PPC(+57.02)PAPELLGGPSVFLFPPKPK	72.77	2843.45	26	-6.4	711.865	4	28.0472	3170000	13300000	6691	20210614_HS_50ng_F2-2.raw	8	P01857|IGHG1_HUMAN;A0A0A0MS08|A0A0A0MS08_HUMAN;A0A0A0MS07|A0A0A0MS07_HUMAN	Carbamidomethylation; Carbamidomethylation	C4:Carbamidomethylation:1000.00;C7:Carbamidomethylation:1000.00	FALSE
TIYTPGSTVLYR	65.92	1369.72	12	-7.6	685.864	2	19.5744	8590000	66100000	4040	20210614_HS_50ng_F3-3.raw	13	P01024|CO3_HUMAN			FALSE
TLADLTLLDSPIK	67.76	1398.8	13	-1.6	700.405	2	25.9757	1980000	12100000	5501	20210614_HS_50ng_F3-2.raw	3	P04114|APOB_HUMAN			FALSE
TLEAQLTPR	57.89	1027.57	9	-0.4	514.79	2	13.0957	4570000	14200000	2755	20210614_HS_50ng_F2-2.raw	9	P05546|HEP2_HUMAN			FALSE
TLLDIDNTR	38	1059.56	9	-3.2	530.784	2	16.7375	3220000	17100000	3804	20210614_HS_50ng_F2-3.raw	1	P35527|K1C9_HUMAN			FALSE
TLLPVSKPEIR	55.9	1251.76	11	-0.1	418.259	3	18.4357	233000	1880000	3843	20210614_HS_50ng_F1-1.raw	3	P01031|CO5_HUMAN			FALSE
TLLSNLEEAK	51.25	1116.6	10	1	559.309	2	18.568	4010000	32200000	4562	20210614_HS_50ng_F2-1.raw	3	H0YLK8|H0YLK8_HUMAN;P10909|CLUS_HUMAN;E7ETB4|E7ETB4_HUMAN;E7ERK6|E7ERK6_HUMAN			FALSE
TLM(+15.99)FGSYLDDEK	57.51	1433.64	12	1.7	717.828	2	20.6117	4060000	30200000	4395	20210614_HS_50ng_F3-3.raw	7	P19652|A1AG2_HUMAN	Oxidation (M)		FALSE
TLQGIPQM(+15.99)IGEVIR	51.89	1569.85	14	1.3	524.293	3	23.3918	2280000	17300000	5337	20210614_HS_50ng_F3-3.raw	5	P04114|APOB_HUMAN	Oxidation (M)		FALSE
TM(+15.99)QALPYSTVGN(+0.98)SNNYLHLSVLR	67.55	2594.28	23	1.1	865.768	3	25.7347	162000	1670000	5461	20210614_HS_50ng_F3-2.raw	3	P01024|CO3_HUMAN	Oxidation (M); Deamidation (NQ)	M2:Oxidation (M):1000.00;N12:Deamidation (NQ):14.04	FALSE
TM(+15.99)QALPYSTVGNSNN(+0.98)YLHLSVLR	51.24	2594.28	23	2	865.769	3	24.6436	134000	1100000	5682	20210614_HS_50ng_F3-3.raw	1	P01024|CO3_HUMAN	Oxidation (M); Deamidation (NQ)	M2:Oxidation (M):1000.00;N15:Deamidation (NQ):0.00	FALSE
TM(+15.99)QALPYSTVGNSNNYLHLSVLR	54.71	2593.3	23	2.9	865.442	3	24.5392	3140000	21200000	6824	20210614_HS_50ng_F2-1.raw	4	P01024|CO3_HUMAN	Oxidation (M)		FALSE
TM(+15.99)SGLEC(+57.02)QAWDSQSPHAHGYIPSK	37.04	2702.19	24	1.6	676.555	4	18.5889	353000	4920000	4325	20210614_HS_50ng_F2-3.raw	3	P00747|PLMN_HUMAN	Oxidation (M); Carbamidomethylation	C7:Carbamidomethylation:1000.00	FALSE
TNAENEFVTIK	58.67	1264.63	11	0	633.322	2	16.8809	6560000	50300000	3643	20210614_HS_50ng_F2-2.raw	9	#CONTAM#cont|000132|;#CONTAM#cont|000135|;#CONTAM#cont|000134|;P04264|K2C1_HUMAN			FALSE
TNFDNDIALVR	51.38	1276.64	11	0.7	639.328	2	20.2069	128000	1300000	4062	20210614_HS_50ng_F3-2.raw	1	A0A087X232|A0A087X232_HUMAN;F8WCZ6|F8WCZ6_HUMAN;P09871|C1S_HUMAN			FALSE
TNLESILSYPK	57.7	1263.67	11	0.9	632.843	2	22.1047	2870000	34900000	5824	20210614_HS_50ng_F2-1.raw	6	H9KV48|H9KV48_HUMAN;P05155|IC1_HUMAN;E9PGN7|E9PGN7_HUMAN			FALSE
TNQVNSGGVLLR	34.38	1256.68	12	1.2	629.35	2	11.7093	1290000	3950000	2644	20210614_HS_50ng_F2-1.raw	2	P02747|C1QC_HUMAN			FALSE
TPENYPNAGLTM(+15.99)NYC(+57.02)R	54.16	1915.82	16	-1.1	958.916	2	16.8173	357000	3800000	3249	20210614_HS_50ng_F3-3.raw	3	P00747|PLMN_HUMAN	Oxidation (M); Carbamidomethylation	C15:Carbamidomethylation:1000.00	FALSE
TPEVTC(+57.02)VVVD(+21.98)VSHEDPEVK	74.98	2160	19	4.6	721.011	3	20.6908	2490000	20900000	5317	20210614_HS_50ng_F2-1.raw	4	P01857|IGHG1_HUMAN;A0A0A0MS08|A0A0A0MS08_HUMAN;A0A0A0MS07|A0A0A0MS07_HUMAN	Carbamidomethylation; Sodium adduct	C6:Carbamidomethylation:1000.00;D10:Sodium adduct:37.99	FALSE
TPEVTC(+57.02)VVVDVSHEDPEVK	77.08	2138.02	19	-0.1	713.681	3	21.888	44800000	354000000	5224	20210614_HS_50ng_F2-2.raw	53	P01857|IGHG1_HUMAN;A0A0A0MS08|A0A0A0MS08_HUMAN;A0A0A0MS07|A0A0A0MS07_HUMAN	Carbamidomethylation	C6:Carbamidomethylation:1000.00	FALSE
TPEVTC(+57.02)VVVDVSHEDPEVQFK	54.66	2413.15	21	-0.3	805.389	3	23.2208	499000	5420000	6240	20210614_HS_50ng_F2-1.raw	3	A0A4W9A917|A0A4W9A917_HUMAN;P01860|IGHG3_HUMAN;A0A286YES1|A0A286YES1_HUMAN	Carbamidomethylation	C6:Carbamidomethylation:1000.00	FALSE
TPLTATLSK	68.4	930.539	9	-5.7	466.274	2	9.621	60100000	143000000	1875	20210614_HS_50ng_F2-2.raw	9	P01876|IGHA1_HUMAN;A0A286YEY1|A0A286YEY1_HUMAN			FALSE
TPSAAYLWVGTGASEAEK	71.41	1836.89	18	2.3	919.454	2	21.3689	695000	9170000	4810	20210614_HS_50ng_F3-1.raw	3	A0A0A0MS51|A0A0A0MS51_HUMAN;P06396|GELS_HUMAN;A0A0A0MT01|A0A0A0MT01_HUMAN			FALSE
TQFNNNE(+21.98)YSQDLDAYNTK	63.73	2185.92	18	-3.8	729.643	3	17.9666	109000	926000	3724	20210614_HS_50ng_F4-1.raw	1	P04114|APOB_HUMAN	Sodium adduct	E7:Sodium adduct:19.86	FALSE
TQFNNNEYSQDLDAYNTK	79.34	2163.93	18	2	1082.98	2	18.535	1260000	9700000	3255	20210614_HS_50ng_F4-2.raw	7	P04114|APOB_HUMAN			FALSE
TSDQIHFFFAK	54.99	1339.66	11	1.2	447.56	3	22.3243	2020000	15400000	4663	20210614_HS_50ng_F1-3b.raw	5	P01008|ANT3_HUMAN;Q8TCE1|Q8TCE1_HUMAN			FALSE
TSESGELHGLTTEEEFVEGIYK	75.04	2454.14	22	-3.3	819.053	3	24.3198	19900000	197000000	6262	20210614_HS_50ng_F2-3.raw	9	P02766|TTHY_HUMAN;A0A087WT59|A0A087WT59_HUMAN			FALSE
TSLEDFYLDEER	53.68	1515.67	12	-2.1	758.842	2	21.3813	456000	3710000	4648	20210614_HS_50ng_F3-3.raw	3	I3L4N7|I3L4N7_HUMAN;P36955|PEDF_HUMAN			FALSE
TSNFNAAISLK	35.39	1164.61	11	-0.4	583.314	2	17.74	574000	2380000	4324	20210614_HS_50ng_F2-1.raw	1	P02748|CO9_HUMAN			FALSE
TSSFALNLPTLPEVK	65.72	1615.88	15	3.7	808.951	2	26.5151	1770000	13000000	6107	20210614_HS_50ng_F3-3.raw	4	P04114|APOB_HUMAN			FALSE
TSTSEEVC(+57.02)SFYLK	65.62	1549.7	13	-2.3	775.854	2	19.4119	286000	2890000	4002	20210614_HS_50ng_F3-3.raw	3	P01031|CO5_HUMAN	Carbamidomethylation	C8:Carbamidomethylation:1000.00	FALSE
TTNIQGINLLFSSR	73.84	1562.84	14	2.3	521.956	3	24.9004	4670000	38900000	5741	20210614_HS_50ng_F3-3.raw	7	A0A140TA32|A0A140TA32_HUMAN;A0A140TA29|A0A140TA29_HUMAN;P0C0L4|CO4A_HUMAN;P0C0L5|CO4B_HUMAN;A0A0G2JPR0|A0A0G2JPR0_HUMAN;A0A140TA49|A0A140TA49_HUMAN;F5GXS0|F5GXS0_HUMAN;A0A140TA44|A0A140TA44_HUMAN;A0A0G2JL54|A0A0G2JL54_HUMAN			FALSE
TTPPM(+15.99)LDSD(+21.98)GSFFLYSK	43.48	1942.86	17	-0.2	648.628	3	23.5006	253000	3120000	5535	20210614_HS_50ng_F3-1.raw	2	P01859|IGHG2_HUMAN;A0A286YEY4|A0A286YEY4_HUMAN	Oxidation (M); Sodium adduct	M5:Oxidation (M):1000.00;D9:Sodium adduct:14.04	FALSE
TTPPM(+15.99)LDSDGSFFLYSK	59.86	1920.88	17	1.9	961.45	2	24.6015	21100000	220000000	5890	20210614_HS_50ng_F3-1.raw	26	P01859|IGHG2_HUMAN;A0A286YEY4|A0A286YEY4_HUMAN	Oxidation (M)		FALSE
TTPPVLDSD(+21.98)GSFFLYSK	57.52	1894.9	17	0.4	632.64	3	24.987	2470000	14300000	5760	20210614_HS_50ng_F3-3.raw	5	P01857|IGHG1_HUMAN;A0A0A0MS08|A0A0A0MS08_HUMAN;A0A0A0MS07|A0A0A0MS07_HUMAN	Sodium adduct	D9:Sodium adduct:14.04	FALSE
TTPPVLDSDGSFFLYSK	67.58	1872.91	17	1.2	937.466	2	24.4583	67700000	768000000	5816	20210614_HS_50ng_F4-1.raw	39	P01857|IGHG1_HUMAN;A0A0A0MS08|A0A0A0MS08_HUMAN;A0A0A0MS07|A0A0A0MS07_HUMAN			FALSE
TTPPVLDSDGSFFLYSR	57.78	1900.92	17	1.5	951.469	2	25.2772	1220000	9020000	5831	20210614_HS_50ng_F3-3.raw	5				FALSE
TVAAC(+57.02)NLPIVR	48.36	1212.66	11	1.6	607.341	2	18.0714	2030000	16300000	4390	20210614_HS_50ng_F2-1.raw	3	P02760|AMBP_HUMAN	Carbamidomethylation	C5:Carbamidomethylation:1000.00	FALSE
TVAAPSVFIFPPSD(+21.98)EQLK	57.72	1967	18	-1.3	656.674	3	26.0366	10400000	55200000	6119	20210614_HS_50ng_F4-1.raw	7	A0A5H1ZRQ3|A0A5H1ZRQ3_HUMAN;P01834|IGKC_HUMAN	Sodium adduct	D14:Sodium adduct:10.11	FALSE
TVAAPSVFIFPPSDEQLK	77.34	1945.02	18	-2.6	973.515	2	26.2359	164000000	1300000000	5518	20210614_HS_50ng_F4-3.raw	60	A0A5H1ZRQ3|A0A5H1ZRQ3_HUMAN;P01834|IGKC_HUMAN			FALSE
TVM(+15.99)VNIE(+21.98)NPEGIPVK	55.38	1676.84	15	0.6	559.955	3	20.2972	1240000	10000000	4435	20210614_HS_50ng_F3-1.raw	2	P01024|CO3_HUMAN	Oxidation (M); Sodium adduct	M3:Oxidation (M):1000.00;E7:Sodium adduct:56.34	FALSE
TVM(+15.99)VNIENPE(+21.98)GIPVK	50.31	1676.84	15	0.3	839.428	2	20.2972	164000	1780000	4436	20210614_HS_50ng_F3-1.raw	1	P01024|CO3_HUMAN	Oxidation (M); Sodium adduct	M3:Oxidation (M):1000.00;E10:Sodium adduct:12.33	FALSE
TVM(+15.99)VNIENPEGIPVK	71.39	1654.86	15	2.1	828.439	2	20.5414	24000000	203000000	3989	20210614_HS_50ng_F4-3.raw	18	P01024|CO3_HUMAN	Oxidation (M)		FALSE
TVMVNIENPEGIPVK	54.46	1638.87	15	4.4	820.443	2	21.6745	102000	1340000	4755	20210614_HS_50ng_F3-3.raw	2	P01024|CO3_HUMAN			FALSE
TVQAVLTVPK	53.17	1054.64	10	2	528.328	2	17.5888	696000	3160000	3982	20210614_HS_50ng_F2-3.raw	3	I3L4N7|I3L4N7_HUMAN;P36955|PEDF_HUMAN			FALSE
TWNAVLLR	42.5	971.555	8	-0.7	486.784	2	33.3436	4610000	7840000	8679	20210614_HS_50ng_F2-1.raw	10				FALSE
TWYPEVPK	37.42	1018.51	8	-2.2	510.262	2	19.156	1970000	11000000	4396	20210614_HS_50ng_F2-2.raw	3	P04003|C4BPA_HUMAN			FALSE
TYE(+21.98)TTLEK	34.61	1005.46	8	-4.5	503.737	2	6.3101	66300000	214000000	1428	20210614_HS_50ng_F2-2.raw	20	A0A0C4DGB6|A0A0C4DGB6_HUMAN;P02768|ALBU_HUMAN;C9JKR2|C9JKR2_HUMAN;D6RHD5|D6RHD5_HUMAN;B7WNR0|B7WNR0_HUMAN;H0YA55|H0YA55_HUMAN	Sodium adduct	E3:Sodium adduct:0.00	FALSE
TYETTLE(+21.98)K	36.33	1005.46	8	-6.4	503.736	2	4.1447	66300000	71500000	1207	20210614_HS_50ng_F2-2.raw	7	A0A0C4DGB6|A0A0C4DGB6_HUMAN;P02768|ALBU_HUMAN;C9JKR2|C9JKR2_HUMAN;D6RHD5|D6RHD5_HUMAN;B7WNR0|B7WNR0_HUMAN;H0YA55|H0YA55_HUMAN	Sodium adduct	E7:Sodium adduct:19.86	FALSE
TYETTLEK	50.72	983.481	8	-3.8	492.746	2	12.2435	260000000	1630000000	3050	20210614_HS_50ng_F2-2.raw	82	A0A0C4DGB6|A0A0C4DGB6_HUMAN;P02768|ALBU_HUMAN;C9JKR2|C9JKR2_HUMAN;D6RHD5|D6RHD5_HUMAN;B7WNR0|B7WNR0_HUMAN;H0YA55|H0YA55_HUMAN			FALSE
TYFPHFDLSHGSAQVK	52.04	1832.88	16	0.5	459.229	4	21.4009	357000	2610000	4445	20210614_HS_50ng_F1-3b.raw	3	P69905|HBA_HUMAN;G3V1N2|G3V1N2_HUMAN;A0A2R8Y7C0|A0A2R8Y7C0_HUMAN			FALSE
TYLPAVDEK	42.68	1034.53	9	1.3	518.272	2	14.821	21000	273000	3090	20210614_HS_50ng_F2-3.raw	2				FALSE
TYM(+15.99)LAFDVNDEK	63.6	1460.65	12	0.1	731.332	2	19.9853	9820000	106000000	4186	20210614_HS_50ng_F3-3.raw	15	P02763|A1AG1_HUMAN	Oxidation (M)		FALSE
VAAGAFQGLR	47.39	988.545	10	1.5	495.281	2	15.8465	52300	410000	3397	20210614_HS_50ng_F2-3.raw	2				FALSE
VAEGTQVLELPFK	59.83	1429.78	13	-0.3	715.898	2	23.609	2440000	16200000	5400	20210614_HS_50ng_F3-3.raw	9	P01008|ANT3_HUMAN			FALSE
VATVSLPR	41.12	841.502	8	-3.9	421.757	2	13.7202	77100000	484000000	2844	20210614_HS_50ng_F2-2.raw	23	#CONTAM#cont|000144|;#CONTAM#cont|000142|;#CONTAM#cont|000023|;#CONTAM#cont|000143|;#CONTAM#cont|000141|;#CONTAM#cont|000040|;#CONTAM#cont|000032|			FALSE
VC(+57.02)PFAGILEN(+0.98)GAVR	65.04	1502.76	14	1.7	752.386	2	23.3254	1520000	12300000	5295	20210614_HS_50ng_F3-3.raw	3	J3QLI0|J3QLI0_HUMAN;J3QRN2|J3QRN2_HUMAN;P02749|APOH_HUMAN	Carbamidomethylation; Deamidation (NQ)	C2:Carbamidomethylation:1000.00	FALSE
VC(+57.02)PFAGILENGAVR	49.14	1501.77	14	1.5	751.894	2	23.7325	97700	1810000	5450	20210614_HS_50ng_F3-3.raw	1	J3QLI0|J3QLI0_HUMAN;J3QRN2|J3QRN2_HUMAN;P02749|APOH_HUMAN	Carbamidomethylation	C2:Carbamidomethylation:1000.00	FALSE
VC(+57.02)SQYAAYGEK	50.61	1274.56	11	-5.9	638.284	2	7.2114	33600	592000	1345	20210614_HS_50ng_F2-3.raw	1	D6RBJ7|D6RBJ7_HUMAN;P02774|VTDB_HUMAN;D6RF35|D6RF35_HUMAN	Carbamidomethylation	C2:Carbamidomethylation:1000.00	FALSE
VD(+21.98)NALQSGNSQESVTEQDSK	60.13	2156.94	20	-4.7	719.985	3	13.7959	1740000	892000	2873	20210614_HS_50ng_F4-1.raw	1	A0A5H1ZRQ3|A0A5H1ZRQ3_HUMAN;P01834|IGKC_HUMAN	Sodium adduct	D2:Sodium adduct:7.44	FALSE
VDFTLSSER	51.28	1052.51	9	-1	527.264	2	14.8641	11500000	60400000	3514	20210614_HS_50ng_F2-1.raw	12	A0A140TA32|A0A140TA32_HUMAN;A0A140TA29|A0A140TA29_HUMAN;P0C0L4|CO4A_HUMAN;P0C0L5|CO4B_HUMAN;A0A0G2JPR0|A0A0G2JPR0_HUMAN;A0A140TA49|A0A140TA49_HUMAN;F5GXS0|F5GXS0_HUMAN;A0A140TA44|A0A140TA44_HUMAN;A0A0G2JL54|A0A0G2JL54_HUMAN			FALSE
VDGALC(+57.02)M(+15.99)EK	35.27	1037.45	9	-2.3	519.732	2	5.2047	480000	1300000	976	20210614_HS_50ng_F2-3.raw	3	P02790|HEMO_HUMAN	Carbamidomethylation; Oxidation (M)	C6:Carbamidomethylation:1000.00	FALSE
VDLLNQEIEFLK	64.01	1459.79	12	2.3	730.905	2	26.0035	223000	2350000	6003	20210614_HS_50ng_F3-3.raw	2	P35908|K22E_HUMAN			FALSE
VDLSFSPSQSLPASHAHLR	76.4	2048.04	19	-0.8	513.018	4	20.6809	10400000	106000000	4466	20210614_HS_50ng_F1-1.raw	14	P01023|A2MG_HUMAN			FALSE
VDNALQ(+0.98)SGNSQ(+0.98)ESVTEQDSK	52.08	2136.93	20	9.5	1069.48	2	17.2077	69100	179000	3001	20210614_HS_50ng_F4-2.raw	1	A0A5H1ZRQ3|A0A5H1ZRQ3_HUMAN;P01834|IGKC_HUMAN	Deamidation (NQ); Deamidation (NQ)	Q6:Deamidation (NQ):5.08;Q11:Deamidation (NQ):0.00	FALSE
VDNALQ(+0.98)SGNSQE(+21.98)SVTEQDSK	57.78	2157.93	20	4	720.319	3	9.7489	1860000	2510000	1701	20210614_HS_50ng_F4-3.raw	5	A0A5H1ZRQ3|A0A5H1ZRQ3_HUMAN;P01834|IGKC_HUMAN	Deamidation (NQ); Sodium adduct	Q6:Deamidation (NQ):0.00;E12:Sodium adduct:16.72	FALSE
VDNALQ(+0.98)SGNSQESVTEQDSK	56.47	2135.95	20	6.7	712.994	3	15.7931	569000	1170000	3259	20210614_HS_50ng_F4-1.raw	3	A0A5H1ZRQ3|A0A5H1ZRQ3_HUMAN;P01834|IGKC_HUMAN	Deamidation (NQ)	Q6:Deamidation (NQ):0.00	FALSE
VDNALQSGN(+0.98)SQE(+21.98)SVTEQDSK	57.83	2157.93	20	9	720.323	3	9.3376	905000	2690000	1909	20210614_HS_50ng_F4-1.raw	4	A0A5H1ZRQ3|A0A5H1ZRQ3_HUMAN;P01834|IGKC_HUMAN	Deamidation (NQ); Sodium adduct	N9:Deamidation (NQ):0.00;E12:Sodium adduct:33.81	FALSE
VDNALQSGN(+0.98)SQESVTEQDSK	56.29	2135.95	20	7.3	712.994	3	18.7698	122000	426000	3920	20210614_HS_50ng_F4-1.raw	1	A0A5H1ZRQ3|A0A5H1ZRQ3_HUMAN;P01834|IGKC_HUMAN	Deamidation (NQ)	N9:Deamidation (NQ):0.00	FALSE
VDNALQSGNSQ(+0.98)E(+21.98)SVTEQDSK	47.63	2157.93	20	4	720.319	3	9.7489	781000	781000	2008	20210614_HS_50ng_F4-3.raw	2	A0A5H1ZRQ3|A0A5H1ZRQ3_HUMAN;P01834|IGKC_HUMAN	Deamidation (NQ); Sodium adduct	Q11:Deamidation (NQ):0.00;E12:Sodium adduct:14.19	FALSE
VDNALQSGNSQ(+0.98)ESVTEQDSK	54.27	2135.95	20	8.8	712.995	3	16.0664	158000	225000	2772	20210614_HS_50ng_F4-2.raw	1	A0A5H1ZRQ3|A0A5H1ZRQ3_HUMAN;P01834|IGKC_HUMAN	Deamidation (NQ)	Q11:Deamidation (NQ):0.00	FALSE
VDNALQSGNSQE(+21.98)SVTE(+21.98)QDSK	47.1	2178.93	20	-10	727.308	3	7.3232	2870000	11600000	1382	20210614_HS_50ng_F4-3.raw	3	A0A5H1ZRQ3|A0A5H1ZRQ3_HUMAN;P01834|IGKC_HUMAN	Sodium adduct; Sodium adduct	E12:Sodium adduct:37.82;E16:Sodium adduct:0.00	FALSE
VDNALQSGNSQE(+21.98)SVTEQDSK	84.81	2156.94	20	-4.2	719.985	3	7.2092	56600000	392000000	1351	20210614_HS_50ng_F4-3.raw	46	A0A5H1ZRQ3|A0A5H1ZRQ3_HUMAN;P01834|IGKC_HUMAN	Sodium adduct	E12:Sodium adduct:43.39	FALSE
VDNALQSGNSQESVTEQDSK	96.88	2134.96	20	-2.1	712.66	3	12.3664	39000000	236000000	2604	20210614_HS_50ng_F4-1.raw	61	A0A5H1ZRQ3|A0A5H1ZRQ3_HUMAN;P01834|IGKC_HUMAN			FALSE
VDTVDPPYPR	44.54	1157.57	10	0.4	579.793	2	14.601	3710000	7880000	2681	20210614_HS_50ng_F3-2.raw	8	P04004|VTNC_HUMAN			FALSE
VEDIPLAR	44.77	911.508	8	-6.2	456.758	2	13.8508	2360000	9220000	2845	20210614_HS_50ng_F2-2.raw	8	P04114|APOB_HUMAN			FALSE
VEDTAVYYC(+57.02)AR	46.32	1345.6	11	-2	673.805	2	13.3837	460000	1150000	2452	20210614_HS_50ng_F3-2.raw	2		Carbamidomethylation	C9:Carbamidomethylation:1000.00	FALSE
VELLHNPAFC(+57.02)SLATTK	71.45	1799.92	16	0.5	600.982	3	21.8012	8550000	59500000	5725	20210614_HS_50ng_F2-1.raw	9	P01024|CO3_HUMAN	Carbamidomethylation	C10:Carbamidomethylation:1000.00	FALSE
VEQAVETEPEPELR	47.45	1624.79	14	-1	813.404	2	16.2155	107000	1140000	3044	20210614_HS_50ng_F3-2.raw	2	E7ERP7|E7ERP7_HUMAN;E9PEV4|E9PEV4_HUMAN;P02649|APOE_HUMAN;H0Y7L5|H0Y7L5_HUMAN			FALSE
VEYGFQVK	48.69	968.497	8	-1.2	485.255	2	15.6698	5560000	19000000	3275	20210614_HS_50ng_F2-2.raw	3	A0A140TA32|A0A140TA32_HUMAN;A0A140TA29|A0A140TA29_HUMAN;P0C0L4|CO4A_HUMAN;P0C0L5|CO4B_HUMAN;A0A0G2JPR0|A0A0G2JPR0_HUMAN;A0A140TA49|A0A140TA49_HUMAN;F5GXS0|F5GXS0_HUMAN;A0A140TA44|A0A140TA44_HUMAN;A0A3B3ISA6|A0A3B3ISA6_HUMAN;A0A0G2JL54|A0A0G2JL54_HUMAN			FALSE
VFDEFKPLVE(+21.98)EPQNLIK	51.84	2066.07	17	-2.9	1034.04	2	25.6612	3430000	23000000	6619	20210614_HS_50ng_F2-3.raw	5	A0A0C4DGB6|A0A0C4DGB6_HUMAN;A0A087WWT3|A0A087WWT3_HUMAN;P02768|ALBU_HUMAN;C9JKR2|C9JKR2_HUMAN;D6RHD5|D6RHD5_HUMAN;B7WNR0|B7WNR0_HUMAN;H0YA55|H0YA55_HUMAN	Sodium adduct	E10:Sodium adduct:0.00	FALSE
VFDEFKPLVEE(+21.98)PQNLIK	66.15	2066.07	17	-2.5	1034.04	2	25.4127	2460000	16700000	6901	20210614_HS_50ng_F2-1.raw	6	A0A0C4DGB6|A0A0C4DGB6_HUMAN;A0A087WWT3|A0A087WWT3_HUMAN;P02768|ALBU_HUMAN;C9JKR2|C9JKR2_HUMAN;D6RHD5|D6RHD5_HUMAN;B7WNR0|B7WNR0_HUMAN;H0YA55|H0YA55_HUMAN	Sodium adduct	E11:Sodium adduct:26.02	FALSE
VFDEFKPLVEEPQ(+0.98)NLIK	43.06	2045.07	17	2.5	682.7	3	25.4999	17900000	130000000	6226	20210614_HS_50ng_F3-1.raw	6	A0A0C4DGB6|A0A0C4DGB6_HUMAN;A0A087WWT3|A0A087WWT3_HUMAN;P02768|ALBU_HUMAN;C9JKR2|C9JKR2_HUMAN;D6RHD5|D6RHD5_HUMAN;B7WNR0|B7WNR0_HUMAN;H0YA55|H0YA55_HUMAN	Deamidation (NQ)	Q13:Deamidation (NQ):7.65	FALSE
VFDEFKPLVEEPQN(+0.98)LIK	62.12	2045.07	17	-2.1	682.697	3	25.486			5888	20210614_HS_50ng_F3-3.raw	2	A0A0C4DGB6|A0A0C4DGB6_HUMAN;A0A087WWT3|A0A087WWT3_HUMAN;P02768|ALBU_HUMAN;C9JKR2|C9JKR2_HUMAN;D6RHD5|D6RHD5_HUMAN;B7WNR0|B7WNR0_HUMAN;H0YA55|H0YA55_HUMAN	Deamidation (NQ)	N14:Deamidation (NQ):17.01	FALSE
VFDEFKPLVEEPQNLIK	77.58	2044.09	17	-7.6	682.365	3	26.1397	371000000	2860000000	6616	20210614_HS_50ng_F2-2.raw	148	A0A0C4DGB6|A0A0C4DGB6_HUMAN;A0A087WWT3|A0A087WWT3_HUMAN;P02768|ALBU_HUMAN;C9JKR2|C9JKR2_HUMAN;D6RHD5|D6RHD5_HUMAN;B7WNR0|B7WNR0_HUMAN;H0YA55|H0YA55_HUMAN			FALSE
VFQFLEK	40.14	909.496	7	1.8	455.756	2	19.2877	311000	2650000	4835	20210614_HS_50ng_F2-1.raw	3	P01031|CO5_HUMAN			FALSE
VFSLQWGEVK	49.6	1191.63	10	4.1	596.824	2	23.6337	572000	5140000	5741	20210614_HS_50ng_F2-2.raw	3	G3XAM2|G3XAM2_HUMAN;A0A2R8Y3M9|A0A2R8Y3M9_HUMAN;E7ETH0|E7ETH0_HUMAN;P05156|CFAI_HUMAN			FALSE
VFSN(+0.98)GAD(+21.98)LSGVTEEAPLK	39.71	1855.88	18	1.1	928.949	2	21.1409	184000	1790000	4153	20210614_HS_50ng_F4-3.raw	1		Deamidation (NQ); Sodium adduct	N4:Deamidation (NQ):1000.00;D7:Sodium adduct:6.67	FALSE
VFSN(+0.98)GADLSGVTE(+21.98)EAPLK	23.16	1855.88	18	0.3	928.948	2	20.9666	773000	5580000	4677	20210614_HS_50ng_F4-1.raw	1		Deamidation (NQ); Sodium adduct	N4:Deamidation (NQ):1000.00;E13:Sodium adduct:0.00	FALSE
VFSN(+0.98)GADLSGVTEEAPLK	76.27	1833.9	18	-1.6	917.956	2	21.1267	89700000	691000000	4355	20210614_HS_50ng_F4-3.raw	36		Deamidation (NQ)		FALSE
VFSNGAD(+21.98)LSGVTEEAPLK	59.32	1854.9	18	-0.3	619.306	3	20.475	673000	8560000	4494	20210614_HS_50ng_F3-1.raw	4		Sodium adduct	D7:Sodium adduct:36.87	FALSE
VFSNGADLSGVTEEAPLK	69.3	1832.92	18	-2.6	917.463	2	20.7074	19200000	201000000	4021	20210614_HS_50ng_F4-3.raw	20				FALSE
VGAHAGEYGAEALER	55.08	1528.73	15	-0.3	510.583	3	14.0572	1870000	7490000	2882	20210614_HS_50ng_F2-3.raw	3	P69905|HBA_HUMAN;A0A2R8Y7C0|A0A2R8Y7C0_HUMAN			FALSE
VGDTLNLNLR	57.41	1113.61	10	1.7	557.815	2	18.7887	11900000	94200000	4648	20210614_HS_50ng_F2-1.raw	7	A0A140TA32|A0A140TA32_HUMAN;A0A140TA29|A0A140TA29_HUMAN;P0C0L4|CO4A_HUMAN;P0C0L5|CO4B_HUMAN;A0A0G2JPR0|A0A0G2JPR0_HUMAN;A0A140TA49|A0A140TA49_HUMAN;F5GXS0|F5GXS0_HUMAN;A0A140TA44|A0A140TA44_HUMAN;A0A3B3ISA6|A0A3B3ISA6_HUMAN;A0A0G2JL54|A0A0G2JL54_HUMAN			FALSE
VGEYSLYIGR	53.48	1155.59	10	1.1	578.804	2	18.6491	3510000	29400000	4586	20210614_HS_50ng_F2-1.raw	5	P02743|SAMP_HUMAN			FALSE
VGFYESDVM(+15.99)GR	50.17	1274.56	11	1.1	638.288	2	12.4553	23300000	104000000	2781	20210614_HS_50ng_F2-1.raw	26	P01023|A2MG_HUMAN	Oxidation (M)		FALSE
VGSALFLSHNLK	37.91	1284.72	12	-1.1	429.247	3	19.5017	43200	454000	3955	20210614_HS_50ng_F1-3b.raw	1	P29622|KAIN_HUMAN			FALSE
VGYVSGWGQSDNFK	64.18	1542.71	14	-1.7	772.361	2	19.272	708000	7040000	4084	20210614_HS_50ng_F3-1.raw	2	A0A0A0MRD9|A0A0A0MRD9_HUMAN;P00739|HPTR_HUMAN			FALSE
VGYVSGWGR	64.25	979.487	9	0.7	490.751	2	15.9497	46600000	338000000	2851	20210614_HS_50ng_F4-3.raw	24	P00738|HPT_HUMAN;J3QLC9|J3QLC9_HUMAN;H3BS21|H3BS21_HUMAN;A0A087WU08|A0A087WU08_HUMAN;H0Y300|H0Y300_HUMAN;A0A0C4DGL8|A0A0C4DGL8_HUMAN;J3QR68|J3QR68_HUMAN			FALSE
VHQYFNVELIQPGAVK	78.27	1840.98	16	-2.3	614.667	3	23.9588	6990000	52000000	5819	20210614_HS_50ng_F2-2.raw	10	P01024|CO3_HUMAN;M0QYC8|M0QYC8_HUMAN			FALSE
VHTE(+21.98)C(+57.02)C(+57.02)HGD(+21.98)LLEC(+57.02)ADDR	52.61	2129.79	17	7.8	710.944	3	16.2613	1240000	5600000	3139	20210614_HS_50ng_F1-3b.raw	1	A0A0C4DGB6|A0A0C4DGB6_HUMAN;P02768|ALBU_HUMAN;C9JKR2|C9JKR2_HUMAN;D6RHD5|D6RHD5_HUMAN;B7WNR0|B7WNR0_HUMAN;H0YA55|H0YA55_HUMAN	Sodium adduct; Carbamidomethylation; Carbamidomethylation; Sodium adduct; Carbamidomethylation	E4:Sodium adduct:29.57;C5:Carbamidomethylation:1000.00;C6:Carbamidomethylation:1000.00;D9:Sodium adduct:47.09;C13:Carbamidomethylation:1000.00	FALSE
VHTE(+21.98)C(+57.02)C(+57.02)HGDLLEC(+57.02)ADDR	75.58	2107.81	17	-1.4	703.61	3	12.1984	2300000	5360000	1887	20210614_HS_50ng_F1-1.raw	4	A0A0C4DGB6|A0A0C4DGB6_HUMAN;P02768|ALBU_HUMAN;C9JKR2|C9JKR2_HUMAN;D6RHD5|D6RHD5_HUMAN;B7WNR0|B7WNR0_HUMAN;H0YA55|H0YA55_HUMAN	Sodium adduct; Carbamidomethylation; Carbamidomethylation; Carbamidomethylation	E4:Sodium adduct:10.19;C5:Carbamidomethylation:1000.00;C6:Carbamidomethylation:1000.00;C13:Carbamidomethylation:1000.00	FALSE
VHTEC(+57.02)C(+57.02)HGD(+21.98)LLEC(+57.02)ADDR	76.29	2107.81	17	-3.1	703.609	3	13.2425	1830000	6580000	2395	20210614_HS_50ng_F1-3b.raw	4	A0A0C4DGB6|A0A0C4DGB6_HUMAN;P02768|ALBU_HUMAN;C9JKR2|C9JKR2_HUMAN;D6RHD5|D6RHD5_HUMAN;B7WNR0|B7WNR0_HUMAN;H0YA55|H0YA55_HUMAN	Carbamidomethylation; Carbamidomethylation; Sodium adduct; Carbamidomethylation	C5:Carbamidomethylation:1000.00;C6:Carbamidomethylation:1000.00;D9:Sodium adduct:0.00;C13:Carbamidomethylation:1000.00	FALSE
VHTEC(+57.02)C(+57.02)HGDLLEC(+57.02)ADDR	113.41	2085.83	17	-0.5	696.284	3	15.1878	117000000	632000000	2649	20210614_HS_50ng_F1-3b.raw	147	A0A0C4DGB6|A0A0C4DGB6_HUMAN;P02768|ALBU_HUMAN;C9JKR2|C9JKR2_HUMAN;D6RHD5|D6RHD5_HUMAN;B7WNR0|B7WNR0_HUMAN;H0YA55|H0YA55_HUMAN	Carbamidomethylation; Carbamidomethylation; Carbamidomethylation	C5:Carbamidomethylation:1000.00;C6:Carbamidomethylation:1000.00;C13:Carbamidomethylation:1000.00	FALSE
VHTEC(+57.02)C(+57.02)HGDLLEC(+57.02)ADDRADLAK	90.59	2584.11	22	-8.7	647.028	4	17.9426	21900000	195000000	3398	20210614_HS_50ng_F1-2.raw	24	A0A0C4DGB6|A0A0C4DGB6_HUMAN;P02768|ALBU_HUMAN;C9JKR2|C9JKR2_HUMAN;D6RHD5|D6RHD5_HUMAN;B7WNR0|B7WNR0_HUMAN;H0YA55|H0YA55_HUMAN	Carbamidomethylation; Carbamidomethylation; Carbamidomethylation	C5:Carbamidomethylation:1000.00;C6:Carbamidomethylation:1000.00;C13:Carbamidomethylation:1000.00	FALSE
VIGNM(+15.99)GQTM(+15.99)EQLTPELK	44.14	1919.93	17	0.6	960.975	2	18.4473	4200000	32000000	3579	20210614_HS_50ng_F3-2.raw	10	A8MUN2|A8MUN2_HUMAN;P04114|APOB_HUMAN	Oxidation (M); Oxidation (M)		FALSE
VILGAHQEVNLEPHVQEIEVSR	62.82	2495.31	22	0.4	624.836	4	21.5916	2030000	17200000	5670	20210614_HS_50ng_F2-1.raw	3	P00747|PLMN_HUMAN			FALSE
VIPAC(+57.02)LPSPNYVVADR	37.47	1769.91	16	3.3	885.967	2	22.226	501000	4220000	4930	20210614_HS_50ng_F3-3.raw	3	P00747|PLMN_HUMAN	Carbamidomethylation	C5:Carbamidomethylation:1000.00	FALSE
VKDLATVYVDVLK	49.08	1461.84	13	3.1	731.932	2	22.4812	264000	2810000	5999	20210614_HS_50ng_F2-1.raw	3	P02647|APOA1_HUMAN			FALSE
VLDELTLAR	47.03	1028.59	9	-0.5	515.3	2	19.0936	133000	1070000	4340	20210614_HS_50ng_F2-2.raw	1	P02533|K1C14_HUMAN;P08779|K1C16_HUMAN			FALSE
VLDELTLTK	36.44	1030.59	9	1.6	516.304	2	18.3048	724000	2790000	4108	20210614_HS_50ng_F2-2.raw	2	#CONTAM#cont|000133|;#CONTAM#cont|000131|;P13645|K1C10_HUMAN;#CONTAM#cont|000129|;#CONTAM#cont|000136|;#CONTAM#cont|000122|;#CONTAM#cont|000130|			FALSE
VLFYVDSEK	54.21	1098.56	9	3.1	550.289	2	18.3642	464000	3540000	4237	20210614_HS_50ng_F2-3.raw	3	P10643|CO7_HUMAN			FALSE
VLGAFSDGLAHLDNLK	61.01	1668.88	16	3.3	557.304	3	23.8056	1320000	12500000	6427	20210614_HS_50ng_F2-1.raw	4	F8W6P5|F8W6P5_HUMAN;E9PFT6|E9PFT6_HUMAN;P02042|HBD_HUMAN;P68871|HBB_HUMAN;A0A2R8Y7R2|A0A2R8Y7R2_HUMAN;E9PEW8|E9PEW8_HUMAN			FALSE
VLLDGVQNPR	54.43	1109.62	10	0.8	555.817	2	13.178	37900000	283000000	3123	20210614_HS_50ng_F2-1.raw	27	P01024|CO3_HUMAN			FALSE
VLM(+15.99)SVLNDNSR	35.32	1262.63	11	0.9	632.322	2	13.5917	110000	509000	2754	20210614_HS_50ng_F2-3.raw	1		Oxidation (M)		FALSE
VLSLAQE(+21.98)QVGGSPEK	39.66	1562.79	15	-1.1	521.937	3	16.8907	336000	1490000	3277	20210614_HS_50ng_F3-3.raw	2	A0A140TA32|A0A140TA32_HUMAN;A0A140TA29|A0A140TA29_HUMAN;P0C0L4|CO4A_HUMAN;P0C0L5|CO4B_HUMAN;A0A0G2JPR0|A0A0G2JPR0_HUMAN;A0A140TA49|A0A140TA49_HUMAN;F5GXS0|F5GXS0_HUMAN;A0A140TA44|A0A140TA44_HUMAN;A0A3B3ISA6|A0A3B3ISA6_HUMAN;A0A0G2JL54|A0A0G2JL54_HUMAN	Sodium adduct	E7:Sodium adduct:14.15	FALSE
VLSLAQEQVGGSPEK	68.58	1540.81	15	-4.7	771.408	2	16.8789	8490000	79400000	3257	20210614_HS_50ng_F3-3.raw	11	A0A140TA32|A0A140TA32_HUMAN;A0A140TA29|A0A140TA29_HUMAN;P0C0L4|CO4A_HUMAN;P0C0L5|CO4B_HUMAN;A0A0G2JPR0|A0A0G2JPR0_HUMAN;A0A140TA49|A0A140TA49_HUMAN;F5GXS0|F5GXS0_HUMAN;A0A140TA44|A0A140TA44_HUMAN;A0A3B3ISA6|A0A3B3ISA6_HUMAN;A0A0G2JL54|A0A0G2JL54_HUMAN			FALSE
VM(+15.99)DKYTFELSR	54.93	1403.68	11	-1.2	468.899	3	17.6279	743000	4720000	3458	20210614_HS_50ng_F1-3b.raw	3	P02774|VTDB_HUMAN;D6RF35|D6RF35_HUMAN	Oxidation (M)		FALSE
VM(+15.99)PIC(+57.02)LPSK	56.94	1059.55	9	-0.6	530.78	2	16.505	51200000	281000000	3157	20210614_HS_50ng_F3-3.raw	13	P00738|HPT_HUMAN;A0A0A0MRD9|A0A0A0MRD9_HUMAN;J3QLC9|J3QLC9_HUMAN;H3BS21|H3BS21_HUMAN;A0A087WU08|A0A087WU08_HUMAN;H0Y300|H0Y300_HUMAN;A0A0C4DGL8|A0A0C4DGL8_HUMAN;J3QR68|J3QR68_HUMAN;P00739|HPTR_HUMAN	Oxidation (M); Carbamidomethylation	C5:Carbamidomethylation:1000.00	FALSE
VM(+15.99)PIC(+57.02)LPSKDYAEVGR	52.26	1849.91	16	2.8	617.644	3	19.8725	5490000	39300000	4773	20210614_HS_50ng_F2-3.raw	7	P00738|HPT_HUMAN;J3QLC9|J3QLC9_HUMAN;H3BS21|H3BS21_HUMAN;A0A087WU08|A0A087WU08_HUMAN;H0Y300|H0Y300_HUMAN;A0A0C4DGL8|A0A0C4DGL8_HUMAN;J3QR68|J3QR68_HUMAN	Oxidation (M); Carbamidomethylation	C5:Carbamidomethylation:1000.00	FALSE
VNQNLVYESGSLNFSK	65.2	1797.89	16	2.1	899.954	2	20.489	562000	5470000	4353	20210614_HS_50ng_F3-3.raw	3	P04114|APOB_HUMAN			FALSE
VNVDEVGGEALGR	62.59	1313.66	13	-1.4	657.835	2	15.7538	6740000	47700000	3274	20210614_HS_50ng_F3-1.raw	7	F8W6P5|F8W6P5_HUMAN;P68871|HBB_HUMAN;A0A2R8Y7R2|A0A2R8Y7R2_HUMAN			FALSE
VPAPPSPQPATYTC(+57.02)VVSHEDSR	63.17	2394.13	22	2.1	799.051	3	18.3813	541000	6860000	3833	20210614_HS_50ng_F3-1.raw	6	A0A0A0MS09|A0A0A0MS09_HUMAN;P01880|IGHD_HUMAN	Carbamidomethylation	C14:Carbamidomethylation:1000.00	FALSE
VPFDAATLHTSTAM(+15.99)AAQHGM(+15.99)DDDGTGQK	61.25	2904.27	28	-1.4	727.073	4	17.8184	2990000	35900000	3922	20210614_HS_50ng_F2-2.raw	5	A0A0A0MS51|A0A0A0MS51_HUMAN;P06396|GELS_HUMAN;A0A0A0MT01|A0A0A0MT01_HUMAN	Oxidation (M); Oxidation (M)		FALSE
VPGLYYFTYHASSR	40.86	1659.8	14	0.9	554.276	3	22.8768	91900	1220000	5548	20210614_HS_50ng_F2-2.raw	2	A0A0A0MSV6|A0A0A0MSV6_HUMAN;P02746|C1QB_HUMAN;D6R934|D6R934_HUMAN			FALSE
VPGTSTSATLTGLTR	62.67	1460.78	15	-3.3	731.397	2	18.1779	358000	3430000	3521	20210614_HS_50ng_F3-2.raw	3	P02751|FINC_HUMAN;H0Y7Z1|H0Y7Z1_HUMAN			FALSE
VPQ(+0.98)VSTPTLVEVSR	37.22	1511.82	14	0.5	504.947	3	22.1545	256000	3800000	5080	20210614_HS_50ng_F3-1.raw	1	A0A0C4DGB6|A0A0C4DGB6_HUMAN;#CONTAM#cont|000097|;#CONTAM#cont|000035|;A0A087WWT3|A0A087WWT3_HUMAN;P02768|ALBU_HUMAN;#CONTAM#cont|000017|;C9JKR2|C9JKR2_HUMAN;D6RHD5|D6RHD5_HUMAN;B7WNR0|B7WNR0_HUMAN;H0YA55|H0YA55_HUMAN	Deamidation (NQ)		FALSE
VPQVSTPTLVE(+21.98)VSR	49.56	1532.82	14	-2.7	511.945	3	20.1023	27200000	192000000	3875	20210614_HS_50ng_F4-3.raw	28	A0A0C4DGB6|A0A0C4DGB6_HUMAN;#CONTAM#cont|000097|;#CONTAM#cont|000035|;A0A087WWT3|A0A087WWT3_HUMAN;P02768|ALBU_HUMAN;#CONTAM#cont|000017|;C9JKR2|C9JKR2_HUMAN;D6RHD5|D6RHD5_HUMAN;B7WNR0|B7WNR0_HUMAN;H0YA55|H0YA55_HUMAN	Sodium adduct	E11:Sodium adduct:24.24	FALSE
VPQVSTPTLVEVSR	75.5	1510.84	14	-2.1	504.618	3	20.0113	145000000	1340000000	3272	20210614_HS_50ng_F5-1.raw	126	A0A0C4DGB6|A0A0C4DGB6_HUMAN;#CONTAM#cont|000097|;#CONTAM#cont|000035|;A0A087WWT3|A0A087WWT3_HUMAN;P02768|ALBU_HUMAN;#CONTAM#cont|000017|;C9JKR2|C9JKR2_HUMAN;D6RHD5|D6RHD5_HUMAN;B7WNR0|B7WNR0_HUMAN;H0YA55|H0YA55_HUMAN			FALSE
VPTGGVEEGLLER	56.23	1354.71	13	-3	678.36	2	18.0281	1130000	9930000	3725	20210614_HS_50ng_F3-1.raw	6	A0A0A0MS09|A0A0A0MS09_HUMAN;P01880|IGHD_HUMAN			FALSE
VPVAVQGE(+21.98)DTVQ(+0.98)SLTQGDGVAK	48.5	2220.09	22	5	741.04	3	21.035	7440	245000	3819	20210614_HS_50ng_F4-2.raw	1	P01024|CO3_HUMAN	Sodium adduct; Deamidation (NQ)	E8:Sodium adduct:0.00;Q12:Deamidation (NQ):3.38	FALSE
VPVAVQGE(+21.98)DTVQSLTQGD(+21.98)GVAK	45.25	2241.09	22	0.1	748.036	3	20.5017	116000	1520000	4436	20210614_HS_50ng_F4-1.raw	1	P01024|CO3_HUMAN	Sodium adduct; Sodium adduct	E8:Sodium adduct:0.00;D18:Sodium adduct:28.70	FALSE
VPVAVQGE(+21.98)DTVQSLTQGDGVAK	58.42	2219.1	22	1.8	740.71	3	21.0202	329000	1780000	3819	20210614_HS_50ng_F4-2.raw	3	P01024|CO3_HUMAN	Sodium adduct	E8:Sodium adduct:0.00	FALSE
VPVAVQGED(+21.98)TVQSLTQGDGVAK	69.97	2219.1	22	3.4	740.711	3	20.6586	739000	9600000	4014	20210614_HS_50ng_F4-3.raw	3	P01024|CO3_HUMAN	Sodium adduct	D9:Sodium adduct:7.65	FALSE
VPVAVQGEDTVQ(+0.98)SLTQGDGVAK	68.63	2198.11	22	4.3	733.713	3	20.0946	43900	2130000	4327	20210614_HS_50ng_F4-1.raw	3	P01024|CO3_HUMAN	Deamidation (NQ)	Q12:Deamidation (NQ):33.98	FALSE
VPVAVQGEDTVQSLTQGDGVAK	83.71	2197.12	22	-7	733.376	3	20.6521	10800000	104000000	3743	20210614_HS_50ng_F4-2.raw	30	P01024|CO3_HUMAN			FALSE
VQ(+0.98)PYLDDFQK	35.54	1252.6	10	-4.2	627.303	2	16.9659	514000	3720000	4132	20210614_HS_50ng_F2-1.raw	1	F8W696|F8W696_HUMAN;P02647|APOA1_HUMAN	Deamidation (NQ)	Q2:Deamidation (NQ):79.54	FALSE
VQALEEANNDLENK	52.3	1585.76	14	-0.7	529.593	3	15.3472	2940000	12900000	2841	20210614_HS_50ng_F3-2.raw	7	P35527|K1C9_HUMAN			FALSE
VQEAHLTEDQIFYFPK	54.4	1963.97	16	3.5	655.665	3	23.7872	343000	4330000	6119	20210614_HS_50ng_F2-3.raw	3	P07360|CO8G_HUMAN			FALSE
VQFELHYQEVK	49.9	1418.72	11	-2.5	473.913	3	18.9932	2320000	21300000	3994	20210614_HS_50ng_F1-1.raw	7	#CONTAM#cont|000108|;Q5T985|Q5T985_HUMAN;Q5T987|Q5T987_HUMAN;P19823|ITIH2_HUMAN			FALSE
VQPYLDDFQK	50.47	1251.61	10	1.6	626.815	2	18.0963	23000000	167000000	3336	20210614_HS_50ng_F4-3.raw	17	F8W696|F8W696_HUMAN;P02647|APOA1_HUMAN			FALSE
VQPYLDDFQKK	46.43	1379.71	11	-1.1	460.91	3	16.7503	51300	405000	3212	20210614_HS_50ng_F1-3b.raw	1	F8W696|F8W696_HUMAN;P02647|APOA1_HUMAN			FALSE
VQSTELC(+57.02)AGHLAGGTDSC(+57.02)QGDSGGPLVC(+57.02)FEK	41.7	3236.42	31	-1.2	1079.81	3	21.6115	129000	1670000	4891	20210614_HS_50ng_F3-1.raw	1	P00747|PLMN_HUMAN	Carbamidomethylation; Carbamidomethylation; Carbamidomethylation	C7:Carbamidomethylation:1000.00;C18:Carbamidomethylation:1000.00;C28:Carbamidomethylation:1000.00	FALSE
VQWKVDNALQSGNSQESVTEQDSK	63.48	2676.26	24	2.4	893.097	3	18.4884	109000	1690000	3741	20210614_HS_50ng_F3-3.raw	2	A0A5H1ZRQ3|A0A5H1ZRQ3_HUMAN;P01834|IGKC_HUMAN			FALSE
VSALLTPAEQTGTWK	57.15	1600.85	15	3.2	801.433	2	20.9331	2050000	19800000	4251	20210614_HS_50ng_F3-2.raw	3	P04114|APOB_HUMAN			FALSE
VSEADSSNADWVTK	57.86	1507.68	14	-1	754.846	2	11.725	955000	3080000	2262	20210614_HS_50ng_F3-3.raw	5	E7ETN3|E7ETN3_HUMAN;P00751|CFAB_HUMAN;A0A0G2JH38|A0A0G2JH38_HUMAN;B4E1Z4|B4E1Z4_HUMAN			FALSE
VSFLSALEEYTK	65.7	1385.71	12	1.8	693.862	2	27.2038	13600000	159000000	6543	20210614_HS_50ng_F2-2.raw	13	F8W696|F8W696_HUMAN;P02647|APOA1_HUMAN			FALSE
VSHSEDDC(+57.02)LAFK	34.94	1406.61	12	-4	704.311	2	12.5182	61100	653000	2514	20210614_HS_50ng_F2-3.raw	1	P01024|CO3_HUMAN;M0QYC8|M0QYC8_HUMAN	Carbamidomethylation	C8:Carbamidomethylation:1000.00	FALSE
VSTAFVYTK	50.71	1014.54	9	-0.4	508.276	2	12.5728	2930000	10300000	2884	20210614_HS_50ng_F2-1.raw	5	P04114|APOB_HUMAN			FALSE
VSVFVPPR	62.79	899.523	8	-2.1	450.768	2	17.7145	11500000	78500000	3897	20210614_HS_50ng_F2-2.raw	10	P01871|IGHM_HUMAN			FALSE
VSVQLEASPAFLAVPVEK	51.1	1883.04	18	2.1	942.529	2	25.5401	621000	7080000	6134	20210614_HS_50ng_F3-1.raw	6	P01023|A2MG_HUMAN			FALSE
VTAAPQSVC(+57.02)ALR	60.61	1271.67	12	-5.6	636.837	2	14.7047	19600000	77700000	3048	20210614_HS_50ng_F2-2.raw	18	P01023|A2MG_HUMAN	Carbamidomethylation	C9:Carbamidomethylation:1000.00	FALSE
VTEPISAESGEQVER	50.66	1629.78	15	1.1	815.9	2	13.262	1010000	4640000	2425	20210614_HS_50ng_F3-3.raw	3				FALSE
VTGEGC(+57.02)VYLQTSLK	58.09	1553.78	14	0	777.895	2	18.7789	1960000	12600000	3803	20210614_HS_50ng_F3-3.raw	4	P01023|A2MG_HUMAN	Carbamidomethylation	C6:Carbamidomethylation:1000.00	FALSE
VTGWGNLK	42.92	873.471	8	-3	437.741	2	14.2314	320000	1310000	2910	20210614_HS_50ng_F2-2.raw	3	P00734|THRB_HUMAN;E9PIT3|E9PIT3_HUMAN			FALSE
VTLTC(+57.02)VAPLSGVDFQLR	44.46	1874.99	17	6.1	626.009	3	26.424	50300	533000	6389	20210614_HS_50ng_F3-1.raw	1	P04217|A1BG_HUMAN;M0R009|M0R009_HUMAN	Carbamidomethylation	C5:Carbamidomethylation:1000.00	FALSE
VTSIQD(+21.98)WVQK	38.54	1224.61	10	1.4	613.314	2	18.1082	694000	5680000	4396	20210614_HS_50ng_F2-1.raw	1	P00738|HPT_HUMAN;J3QLC9|J3QLC9_HUMAN;A0A087WU08|A0A087WU08_HUMAN;H0Y300|H0Y300_HUMAN;A0A0C4DGL8|A0A0C4DGL8_HUMAN;J3QR68|J3QR68_HUMAN	Sodium adduct	D6:Sodium adduct:38.03	FALSE
VTSIQDWVQK	54.87	1202.63	10	-2.5	602.321	2	18.1084	59100000	266000000	4495	20210614_HS_50ng_F2-1.raw	21	P00738|HPT_HUMAN;J3QLC9|J3QLC9_HUMAN;A0A087WU08|A0A087WU08_HUMAN;H0Y300|H0Y300_HUMAN;A0A0C4DGL8|A0A0C4DGL8_HUMAN;J3QR68|J3QR68_HUMAN			FALSE
VTTSQDM(+15.99)LSIM(+15.99)EK	53.94	1513.7	13	-0.1	757.857	2	12.669	7300000	18600000	2389	20210614_HS_50ng_F3-3.raw	13	H9KV48|H9KV48_HUMAN;P05155|IC1_HUMAN;E9PGN7|E9PGN7_HUMAN	Oxidation (M); Oxidation (M)		FALSE
VTTVASHTSDSD(+21.98)VPSGVTEVVVK	53.08	2335.15	23	4.6	779.395	3	18.6244	61200	1630000	4597	20210614_HS_50ng_F2-1.raw	1	H0YAS8|H0YAS8_HUMAN;P10909|CLUS_HUMAN;H0YC35|H0YC35_HUMAN	Sodium adduct	D12:Sodium adduct:0.00	FALSE
VTTVASHTSDSDVPSGVTEVVVK	64.57	2313.17	23	-1.2	772.063	3	19.263	10500000	95300000	4385	20210614_HS_50ng_F2-2.raw	7	H0YAS8|H0YAS8_HUMAN;P10909|CLUS_HUMAN;H0YC35|H0YC35_HUMAN			FALSE
VTVLGQPK	40.18	840.507	8	-5.6	421.258	2	7.3249	2320000	7900000	1325	20210614_HS_50ng_F2-2.raw	5	A0A0B4J231|A0A0B4J231_HUMAN;B9A064|IGLL5_HUMAN			FALSE
VTYTSQEDLVEK	51.79	1410.69	12	-0.8	706.351	2	14.3596	230000	1320000	2648	20210614_HS_50ng_F3-2.raw	2	G3XAM2|G3XAM2_HUMAN;A0A2R8Y3M9|A0A2R8Y3M9_HUMAN;A0A087X0I2|A0A087X0I2_HUMAN;E7ETH0|E7ETH0_HUMAN;P05156|CFAI_HUMAN			FALSE
VVAEGFDFAN(+0.98)GINISPDGK	61.31	1949.94	19	2.4	975.978	2	24.1718	170000	1890000	5010	20210614_HS_50ng_F4-3.raw	2	P27169|PON1_HUMAN	Deamidation (NQ)	N10:Deamidation (NQ):28.36	FALSE
VVAQGVGIPEDSIFTM(+15.99)ADR	57.88	2019.99	19	-0.8	674.338	3	23.1799	1780000	15100000	4738	20210614_HS_50ng_F4-3.raw	5	P02760|AMBP_HUMAN;S4R471|S4R471_HUMAN;S4R3Y4|S4R3Y4_HUMAN	Oxidation (M)		FALSE
VVGGLVALR	42.92	882.565	9	-0.6	442.29	2	18.3161	112000	893000	4104	20210614_HS_50ng_F2-2.raw	1				FALSE
VVLHPNYHQVDIGLIK	50.86	1844.03	16	1.3	462.016	4	21.8011	265000	2600000	4551	20210614_HS_50ng_F1-3b.raw	3	A0A0A0MRD9|A0A0A0MRD9_HUMAN;P00739|HPTR_HUMAN			FALSE
VVLHPNYSQVDIGLIK	70.09	1794	16	-2.4	599.007	3	23.0076	1920000	25600000	5866	20210614_HS_50ng_F2-3.raw	6	P00738|HPT_HUMAN;J3QLC9|J3QLC9_HUMAN;H3BS21|H3BS21_HUMAN;A0A087WU08|A0A087WU08_HUMAN;H0Y300|H0Y300_HUMAN;A0A0C4DGL8|A0A0C4DGL8_HUMAN;J3QR68|J3QR68_HUMAN			FALSE
VVNNSPQPQNVVFDVQIPK	66.87	2121.12	19	1	708.049	3	23.5455	605000	6170000	5395	20210614_HS_50ng_F4-1.raw	6	Q5T985|Q5T985_HUMAN;Q5T987|Q5T987_HUMAN;P19823|ITIH2_HUMAN			FALSE
VVSVLTVLHQDWLN(+0.98)GK	69.19	1807.98	16	0.7	905	2	27.1806	14300000	106000000	7446	20210614_HS_50ng_F2-1.raw	17	A0A4W9A917|A0A4W9A917_HUMAN;P01857|IGHG1_HUMAN;P01860|IGHG3_HUMAN;A0A0A0MS08|A0A0A0MS08_HUMAN;A0A286YES1|A0A286YES1_HUMAN	Deamidation (NQ)	N14:Deamidation (NQ):38.03	FALSE
VVSVLTVVHQDWLN(+0.98)GK	72.76	1793.97	16	1.8	897.993	2	25.3636	13600000	97400000	6541	20210614_HS_50ng_F2-3.raw	16	P01859|IGHG2_HUMAN;A0A286YEY4|A0A286YEY4_HUMAN	Deamidation (NQ)	N14:Deamidation (NQ):59.20	FALSE
VVSVLTVVHQDWLNGK	45.67	1792.98	16	-1.8	598.667	3	26.0459	388000	4610000	6317	20210614_HS_50ng_F2-2.raw	2	P01859|IGHG2_HUMAN;A0A286YEY4|A0A286YEY4_HUMAN			FALSE
VVYSASGSK	38.03	896.46	9	-4.8	449.235	2	13.16			2950	20210614_HS_50ng_F2-1.raw	3				FALSE
VWVYPPEK	48.82	1016.53	8	-2.9	509.272	2	17.4523	50900000	76000000	3834	20210614_HS_50ng_F2-2.raw	11	P02790|HEMO_HUMAN;Q9BS19|Q9BS19_HUMAN			FALSE
VYAC(+57.02)E(+21.98)VTHQGLSSPVTK	64.73	1896.9	17	2.9	633.31	3	16.6383	318000	3390000	3647	20210614_HS_50ng_F2-3.raw	1	A0A5H1ZRQ3|A0A5H1ZRQ3_HUMAN;P01834|IGKC_HUMAN	Carbamidomethylation; Sodium adduct	C4:Carbamidomethylation:1000.00;E5:Sodium adduct:64.00	FALSE
VYAC(+57.02)EVTHQGLSSPVTK	74.82	1874.92	17	0.5	938.468	2	16.8272	83400000	629000000	3614	20210614_HS_50ng_F2-2.raw	29	A0A5H1ZRQ3|A0A5H1ZRQ3_HUMAN;P01834|IGKC_HUMAN	Carbamidomethylation	C4:Carbamidomethylation:1000.00	FALSE
VYAYYNLE(+21.98)ESC(+57.02)TR	44.6	1688.71	13	2.7	563.913	3	18.0874	137000	971000	3742	20210614_HS_50ng_F3-1.raw	1	P01024|CO3_HUMAN	Sodium adduct; Carbamidomethylation	E8:Sodium adduct:17.01;C11:Carbamidomethylation:1000.00	FALSE
VYAYYNLEESC(+57.02)TR	70.44	1666.73	13	2.3	834.374	2	18.4979	3880000	30200000	3728	20210614_HS_50ng_F3-3.raw	8	P01024|CO3_HUMAN	Carbamidomethylation	C11:Carbamidomethylation:1000.00	FALSE
VYFAGFPR	43.43	955.492	8	5.1	478.755	2	20.8457	184000	1860000	4900	20210614_HS_50ng_F2-2.raw	2	A0A3B3ISJ1|A0A3B3ISJ1_HUMAN;G5E9F8|G5E9F8_HUMAN;P07225|PROS_HUMAN;A0A0S2Z4L3|A0A0S2Z4L3_HUMAN;A0A3B3IRK9|A0A3B3IRK9_HUMAN			FALSE
WEAEPVYVQR	31.4	1275.62	10	-0.9	638.819	2	18.2479	94700	1180000	3546	20210614_HS_50ng_F3-2.raw	2	C9JEV0|C9JEV0_HUMAN;P25311|ZA2G_HUMAN			FALSE
WELLQQVDTSTR	59.27	1474.74	12	3.4	738.381	2	21.4883	915000	11000000	4697	20210614_HS_50ng_F3-3.raw	4	#CONTAM#cont|000132|;#CONTAM#cont|000135|;#CONTAM#cont|000134|;P04264|K2C1_HUMAN			FALSE
WEM(+15.99)PFDPQDTHQSR	39.87	1788.75	14	2	597.259	3	17.3658	107000	2910000	3890	20210614_HS_50ng_F2-3.raw	2	G3V595|G3V595_HUMAN;P01011|AACT_HUMAN	Oxidation (M)		FALSE
WFYIASAFR	44.69	1159.58	9	2.5	580.799	2	25.7592			6665	20210614_HS_50ng_F2-3.raw	2	P02763|A1AG1_HUMAN;P19652|A1AG2_HUMAN			FALSE
WLQGSQELPR	58.66	1212.63	10	-0.2	607.32	2	17.576	16400000	142000000	3457	20210614_HS_50ng_F3-3.raw	13	P01876|IGHA1_HUMAN;A0A286YEY1|A0A286YEY1_HUMAN			FALSE
WNFYYSPQSSPDK	51.07	1617.71	13	0.1	809.862	2	20.9379	33500	687000	4521	20210614_HS_50ng_F3-3.raw	1	P04114|APOB_HUMAN			FALSE
WQQGNVFSC(+57.02)SVM(+15.99)HEALHNHYTQK	50.39	2816.25	23	4.5	705.074	4	19.0851	372000	3000000	4034	20210614_HS_50ng_F1-1.raw	2	P01859|IGHG2_HUMAN;P01857|IGHG1_HUMAN;A0A286YEY4|A0A286YEY4_HUMAN;A0A0A0MS08|A0A0A0MS08_HUMAN;A0A0A0MS07|A0A0A0MS07_HUMAN	Carbamidomethylation; Oxidation (M)	C9:Carbamidomethylation:1000.00	FALSE
WQSIPLC(+57.02)VEK	50.99	1258.64	10	0.7	630.327	2	20.9048	397000	3820000	5136	20210614_HS_50ng_F2-3.raw	3	P08603|CFAH_HUMAN	Carbamidomethylation	C7:Carbamidomethylation:1000.00	FALSE
WYVDGVEVHNAK	57.98	1415.68	12	-1.9	472.901	3	17.5711	948000	6090000	3607	20210614_HS_50ng_F1-1.raw	5	A0A4W9A917|A0A4W9A917_HUMAN;P01860|IGHG3_HUMAN;A0A286YES1|A0A286YES1_HUMAN			FALSE
YAASSYLSLTPE(+21.98)QWK	35.35	1764.83	15	1.1	589.286	3	23.3824	180000	4830000	5504	20210614_HS_50ng_F3-1.raw	1	P0DOY2|IGLC2_HUMAN;A0A0B4J231|A0A0B4J231_HUMAN;P0DOY3|IGLC3_HUMAN;B9A064|IGLL5_HUMAN	Sodium adduct	E12:Sodium adduct:0.00	FALSE
YAASSYLSLTPEQWK	71.89	1742.85	15	-2.6	872.431	2	23.3824	16000000	136000000	5507	20210614_HS_50ng_F3-1.raw	29	P0DOY2|IGLC2_HUMAN;A0A0B4J231|A0A0B4J231_HUMAN;P0DOY3|IGLC3_HUMAN;B9A064|IGLL5_HUMAN			FALSE
YAATSQVLLPSK	69.61	1276.7	12	-4.5	639.356	2	17.3102	13400000	107000000	3425	20210614_HS_50ng_F3-3.raw	14	P01871|IGHM_HUMAN			FALSE
YDVENC(+57.02)LANK	60.88	1224.54	10	-1.7	613.278	2	11.3292	6500000	31300000	2370	20210614_HS_50ng_F2-2.raw	7	P01023|A2MG_HUMAN	Carbamidomethylation	C6:Carbamidomethylation:1000.00	FALSE
YEELQITAGR	50.09	1178.59	10	1	590.304	2	16.2141	10100000	42700000	3065	20210614_HS_50ng_F3-3.raw	13	#CONTAM#cont|000132|;#CONTAM#cont|000135|;#CONTAM#cont|000134|;P04264|K2C1_HUMAN			FALSE
YEELQVTVGR	53.77	1192.61	10	-0.1	597.312	2	15.9832	741000	3380000	3190	20210614_HS_50ng_F3-1.raw	6	P35908|K22E_HUMAN			FALSE
YEFLN(+0.98)GR	45.83	898.418	7	-1.8	450.216	2	14.3621	832000	4040000	2948	20210614_HS_50ng_F2-2.raw	7	P00747|PLMN_HUMAN	Deamidation (NQ)		FALSE
YEITTIHNLFR	56.18	1405.74	11	0.6	469.586	3	22.6687	920000	7140000	4745	20210614_HS_50ng_F1-3b.raw	5	P05546|HEP2_HUMAN			FALSE
YENEVALR	37.46	992.493	8	-3.4	497.252	2	8.1534	171000	762000	1647	20210614_HS_50ng_F2-3.raw	1	#CONTAM#cont|000133|;#CONTAM#cont|000131|;P13645|K1C10_HUMAN;#CONTAM#cont|000129|;#CONTAM#cont|000136|;#CONTAM#cont|000122|;#CONTAM#cont|000130|			FALSE
YENYELTLK	47.85	1171.58	9	2.4	586.797	2	18.0197	1650000	12700000	4118	20210614_HS_50ng_F2-3.raw	3	P04114|APOB_HUMAN			FALSE
YEVDQQIQVLM(+15.99)DK	61.39	1623.78	13	-2.1	812.896	2	19.3208	609000	8780000	4110	20210614_HS_50ng_F3-1.raw	3	P04114|APOB_HUMAN	Oxidation (M)		FALSE
YEVSVYALK	36.24	1070.56	9	2.1	536.291	2	18.6992	78100	781000	4631	20210614_HS_50ng_F2-1.raw	2	P02751|FINC_HUMAN;H0Y7Z1|H0Y7Z1_HUMAN			FALSE
YFIDFVAR	56.12	1029.53	8	2.2	515.773	2	23.095	3580000	39600000	5592	20210614_HS_50ng_F2-2.raw	8	P01042|KNG1_HUMAN			FALSE
YGAATFTR	44.91	885.434	8	-6	443.722	2	7.2415	1540000	8320000	1475	20210614_HS_50ng_F2-2.raw	5	P01023|A2MG_HUMAN;P20742|PZP_HUMAN			FALSE
YGIDWASGR	38.24	1023.48	9	1.6	512.747	2	17.9408	76900	820000	3953	20210614_HS_50ng_F2-2.raw	3	O75636|FCN3_HUMAN			FALSE
YGLVTYATYPK	58.97	1274.65	11	-1.6	638.334	2	19.4875	1140000	12900000	4012	20210614_HS_50ng_F3-3.raw	3	E7ETN3|E7ETN3_HUMAN;P00751|CFAB_HUMAN;A0A0G2JH38|A0A0G2JH38_HUMAN;B4E1Z4|B4E1Z4_HUMAN			FALSE
YGM(+15.99)VAQVTQTLK	66.4	1353.7	12	-0.7	677.855	2	16.4579	2030000	10800000	3114	20210614_HS_50ng_F3-3.raw	6	A8MUN2|A8MUN2_HUMAN;P04114|APOB_HUMAN	Oxidation (M)		FALSE
YGQTIRPIC(+57.02)LPC(+57.02)TEGTTR	66.27	2122.03	18	1.2	708.351	3	20.3309	524000	6350000	4943	20210614_HS_50ng_F2-3.raw	3	H7C5H1|H7C5H1_HUMAN;E7ETN3|E7ETN3_HUMAN;P00751|CFAB_HUMAN;B4E1Z4|B4E1Z4_HUMAN	Carbamidomethylation; Carbamidomethylation	C9:Carbamidomethylation:1000.00;C12:Carbamidomethylation:1000.00	FALSE
YIC(+57.02)EN(+0.98)QDSISSK	44.85	1443.62	12	1.8	722.818	2	9.9203	3380000	3580000	1913	20210614_HS_50ng_F3-2.raw	3	A0A0C4DGB6|A0A0C4DGB6_HUMAN;P02768|ALBU_HUMAN;C9JKR2|C9JKR2_HUMAN;D6RHD5|D6RHD5_HUMAN;B7WNR0|B7WNR0_HUMAN;H0YA55|H0YA55_HUMAN	Carbamidomethylation; Deamidation (NQ)	C3:Carbamidomethylation:1000.00;N5:Deamidation (NQ):14.02	FALSE
YIC(+57.02)ENQ(+0.98)DSISSK	46.33	1443.62	12	2.9	722.819	2	9.3794	1900000	1590000	1868	20210614_HS_50ng_F3-3.raw	1	A0A0C4DGB6|A0A0C4DGB6_HUMAN;P02768|ALBU_HUMAN;C9JKR2|C9JKR2_HUMAN;D6RHD5|D6RHD5_HUMAN;B7WNR0|B7WNR0_HUMAN;H0YA55|H0YA55_HUMAN	Carbamidomethylation; Deamidation (NQ)	C3:Carbamidomethylation:1000.00;Q6:Deamidation (NQ):0.00	FALSE
YIC(+57.02)ENQD(+21.98)SISSK	51.2	1464.62	12	3.4	733.318	2	3.7032	14200000	35400000	939	20210614_HS_50ng_F3-1.raw	27	A0A0C4DGB6|A0A0C4DGB6_HUMAN;P02768|ALBU_HUMAN;C9JKR2|C9JKR2_HUMAN;D6RHD5|D6RHD5_HUMAN;B7WNR0|B7WNR0_HUMAN;H0YA55|H0YA55_HUMAN	Carbamidomethylation; Sodium adduct	C3:Carbamidomethylation:1000.00;D7:Sodium adduct:19.16	FALSE
YIC(+57.02)ENQDSISSK	60.95	1442.63	12	-7.5	722.319	2	16.7667	173000000	944000000	3245	20210614_HS_50ng_F3-3.raw	100	A0A0C4DGB6|A0A0C4DGB6_HUMAN;P02768|ALBU_HUMAN;C9JKR2|C9JKR2_HUMAN;D6RHD5|D6RHD5_HUMAN;B7WNR0|B7WNR0_HUMAN;H0YA55|H0YA55_HUMAN	Carbamidomethylation	C3:Carbamidomethylation:1000.00	FALSE
YIYGKPVQGVAYVR	44.93	1611.88	14	-1.4	538.299	3	18.9846	580000	6010000	4307	20210614_HS_50ng_F2-2.raw	2	A0A140TA32|A0A140TA32_HUMAN;A0A140TA29|A0A140TA29_HUMAN;P0C0L4|CO4A_HUMAN;P0C0L5|CO4B_HUMAN;A0A0G2JPR0|A0A0G2JPR0_HUMAN;A0A140TA49|A0A140TA49_HUMAN;F5GXS0|F5GXS0_HUMAN;A0A140TA44|A0A140TA44_HUMAN;A0A0G2JL54|A0A0G2JL54_HUMAN			FALSE
YKEENDDFASFR	38.61	1519.66	12	-0.9	507.559	3	16.4641	653000	3790000	3603	20210614_HS_50ng_F2-3.raw	3	P04196|HRG_HUMAN			FALSE
YLDGLTAER	36.82	1036.52	9	0.5	519.267	2	15.1243	144000	1250000	3180	20210614_HS_50ng_F2-3.raw	1	P35908|K22E_HUMAN			FALSE
YLGEEYVK	56.28	999.491	8	-3	500.751	2	12.6443	82200000	488000000	2789	20210614_HS_50ng_F2-1.raw	19	P02787|TRFE_HUMAN			FALSE
YLTWASR	53.66	895.455	7	-1.5	448.734	2	14.1814	19200000	89600000	3250	20210614_HS_50ng_F2-1.raw	19	P01876|IGHA1_HUMAN;A0A286YEY1|A0A286YEY1_HUMAN			FALSE
YLYEIAR	54.54	926.486	7	-2.6	464.249	2	16.7171	300000000	1640000000	2640	20210614_HS_50ng_F5-2.raw	176	A0A0C4DGB6|A0A0C4DGB6_HUMAN;#CONTAM#cont|000097|;#CONTAM#cont|000035|;P02768|ALBU_HUMAN;H7C013|H7C013_HUMAN;#CONTAM#cont|000017|;H0YA55|H0YA55_HUMAN			FALSE
YN(+0.98)SQNQSNNQFVLYR	41.76	1874.85	15	2.7	938.437	2	18.4679	80000	527000	3873	20210614_HS_50ng_F4-1.raw	1	P01042|KNG1_HUMAN	Deamidation (NQ)	N2:Deamidation (NQ):0.00	FALSE
YNALDLTNN(+0.98)GK	63.78	1222.58	11	-0.4	612.298	2	14.6244	1190000	3890000	2690	20210614_HS_50ng_F3-3.raw	3	P04114|APOB_HUMAN	Deamidation (NQ)	N9:Deamidation (NQ):12.28	FALSE
YNALDLTNNGK	64.51	1221.6	11	1.5	611.808	2	15.1388	274000	1730000	3181	20210614_HS_50ng_F2-3.raw	2	P04114|APOB_HUMAN			FALSE
YNSQNQSNN(+0.98)QFVLYR	48.34	1874.85	15	2.5	938.437	2	18.8088	68500	563000	3537	20210614_HS_50ng_F4-3.raw	1	P01042|KNG1_HUMAN	Deamidation (NQ)	N9:Deamidation (NQ):0.00	FALSE
YNSQNQSNNQFVLYR	73.35	1873.87	15	-1.1	937.942	2	18.4551	2520000	13900000	3714	20210614_HS_50ng_F3-3.raw	7	P01042|KNG1_HUMAN			FALSE
YPLYVLK	35.52	894.521	7	1.8	448.269	2	19.728	46800	695000	4736	20210614_HS_50ng_F2-3.raw	1				FALSE
YRGDQDATM(+15.99)SILDISM(+15.99)M(+15.99)TGFAPDTDDLK	38.19	3154.38	28	4.8	1052.47	3	24.4317	72300	751000	5842	20210614_HS_50ng_F3-1.raw	1	P01024|CO3_HUMAN;M0QYC8|M0QYC8_HUMAN	Oxidation (M); Oxidation (M); Oxidation (M)		FALSE
YSDASDC(+57.02)HGEDSQAFC(+57.02)EK	49.28	2104.77	18	1.5	702.6	3	7.3381	23300	647000	1385	20210614_HS_50ng_F2-3.raw	1	P01023|A2MG_HUMAN	Carbamidomethylation; Carbamidomethylation	C7:Carbamidomethylation:1000.00;C16:Carbamidomethylation:1000.00	FALSE
YSLTYIYTGLSK	58.56	1407.73	12	0.6	704.872	2	23.6924	530000	5450000	5006	20210614_HS_50ng_F3-2.raw	3	C9JEV0|C9JEV0_HUMAN;P25311|ZA2G_HUMAN			FALSE
YSPGGTPTAIK	36.44	1090.57	11	-1.2	546.29	2	8.4833	69800	392000	1693	20210614_HS_50ng_F2-3.raw	1	H0YAC1|H0YAC1_HUMAN;E9PBC5|E9PBC5_HUMAN;P03952|KLKB1_HUMAN			FALSE
YSPSFQGQVTISADK	62.74	1626.79	15	2.1	814.403	2	18.4404	889000	6710000	3716	20210614_HS_50ng_F3-3.raw	3	A0A0C4DH38|HV551_HUMAN			FALSE
YTC(+57.02)LPGYVR	47.71	1127.54	9	2.3	564.78	2	15.7694	2560000	13600000	3643	20210614_HS_50ng_F2-1.raw	3	P04003|C4BPA_HUMAN	Carbamidomethylation	C3:Carbamidomethylation:1000.00	FALSE
YTFELSR	40.31	914.45	7	-1.3	458.232	2	17.2982	7090000	72400000	3874	20210614_HS_50ng_F2-3.raw	5	P02774|VTDB_HUMAN;D6RF35|D6RF35_HUMAN			FALSE
YTYNYE(+21.98)AESSSGVPGTADSR	49.81	2174.9	20	-5.7	725.97	3	16.1605	117000	989000	3301	20210614_HS_50ng_F4-1.raw	1	A8MUN2|A8MUN2_HUMAN;A0A669KB70|A0A669KB70_HUMAN;P04114|APOB_HUMAN	Sodium adduct	E6:Sodium adduct:0.00	FALSE
YTYNYEAESSSGVPGTADSR	60.05	2152.92	20	-0.7	1077.47	2	16.6556	991000	7330000	3009	20210614_HS_50ng_F4-3.raw	5	A8MUN2|A8MUN2_HUMAN;A0A669KB70|A0A669KB70_HUMAN;P04114|APOB_HUMAN			FALSE
YVGGQEHFAHLLILR	67.59	1751.95	15	2.4	438.994	4	23.803	1000000	5070000	4695	20210614_HS_50ng_F1-2.raw	5	P02763|A1AG1_HUMAN			FALSE
YVLPNFEVK	57.91	1107.6	9	2.3	554.807	2	21.5916	5880000	44300000	5661	20210614_HS_50ng_F2-1.raw	7	A0A140TA32|A0A140TA32_HUMAN;A0A140TA29|A0A140TA29_HUMAN;P0C0L4|CO4A_HUMAN;P0C0L5|CO4B_HUMAN;A0A0G2JPR0|A0A0G2JPR0_HUMAN;A0A140TA49|A0A140TA49_HUMAN;F5GXS0|F5GXS0_HUMAN;A0A140TA44|A0A140TA44_HUMAN;A0A0G2JL54|A0A0G2JL54_HUMAN			FALSE
YVLSPYK	50.04	868.469	7	-0.5	435.242	2	14.6269			3044	20210614_HS_50ng_F2-3.raw	1	P01031|CO5_HUMAN			FALSE
YVM(+15.99)LPVAD(+21.98)QDQC(+57.02)IR	59.45	1744.79	14	2.5	582.605	3	19.5744	1100000	12900000	4069	20210614_HS_50ng_F3-3.raw	7	P00738|HPT_HUMAN;J3QLC9|J3QLC9_HUMAN;H3BS21|H3BS21_HUMAN;A0A087WU08|A0A087WU08_HUMAN;H0Y300|H0Y300_HUMAN;A0A0C4DGL8|A0A0C4DGL8_HUMAN;J3QR68|J3QR68_HUMAN	Oxidation (M); Sodium adduct; Carbamidomethylation	M3:Oxidation (M):1000.00;D8:Sodium adduct:32.28;C12:Carbamidomethylation:1000.00	FALSE
YVM(+15.99)LPVADQDQC(+57.02)IR	77.77	1722.81	14	3.2	862.413	2	19.5933	25500000	247000000	3741	20210614_HS_50ng_F4-3.raw	38	P00738|HPT_HUMAN;J3QLC9|J3QLC9_HUMAN;H3BS21|H3BS21_HUMAN;A0A087WU08|A0A087WU08_HUMAN;H0Y300|H0Y300_HUMAN;A0A0C4DGL8|A0A0C4DGL8_HUMAN;J3QR68|J3QR68_HUMAN	Oxidation (M); Carbamidomethylation	C12:Carbamidomethylation:1000.00	FALSE
YVM(+15.99)LPVADQYDC(+57.02)ITHYEGSTC(+57.02)PK	41.11	2762.2	23	3.2	921.744	3	22.8308	149000	1990000	5154	20210614_HS_50ng_F3-3.raw	3	A0A0A0MRD9|A0A0A0MRD9_HUMAN;P00739|HPTR_HUMAN	Oxidation (M); Carbamidomethylation; Carbamidomethylation	C12:Carbamidomethylation:1000.00;C21:Carbamidomethylation:1000.00	FALSE
YVMLPVADQDQC(+57.02)IR	45.61	1706.81	14	0.5	854.414	2	21.5554			4442	20210614_HS_50ng_F3-2.raw	1	P00738|HPT_HUMAN;J3QLC9|J3QLC9_HUMAN;H3BS21|H3BS21_HUMAN;A0A087WU08|A0A087WU08_HUMAN;H0Y300|H0Y300_HUMAN;A0A0C4DGL8|A0A0C4DGL8_HUMAN;J3QR68|J3QR68_HUMAN	Carbamidomethylation	C12:Carbamidomethylation:1000.00	FALSE
YVTSAPM(+15.99)PEPQAPGR	66.16	1615.77	15	-0.7	808.89	2	13.9811	15200000	68400000	2612	20210614_HS_50ng_F3-3.raw	15	P01871|IGHM_HUMAN	Oxidation (M)		FALSE
YVYIAELLAHK	56.91	1318.73	11	0.2	440.584	3	24.1973	59900	530000	5037	20210614_HS_50ng_F1-3b.raw	1	P27169|PON1_HUMAN			FALSE
YWGVASFLQK	57.3	1197.62	10	2.3	599.818	2	24.0587	1420000	10700000	6521	20210614_HS_50ng_F2-1.raw	3	Q5VY30|Q5VY30_HUMAN;P02753|RET4_HUMAN			FALSE
YYC(+57.02)FQGN(+0.98)QFLR	39.62	1495.66	11	2	748.837	2	20.737			4595	20210614_HS_50ng_F3-1.raw	1	P02790|HEMO_HUMAN;Q9BS19|Q9BS19_HUMAN	Carbamidomethylation; Deamidation (NQ)	C3:Carbamidomethylation:1000.00;N7:Deamidation (NQ):17.01	FALSE
YYC(+57.02)FQGNQFLR	60.58	1494.67	11	3	748.345	2	21.9465	2840000	24800000	5225	20210614_HS_50ng_F2-2.raw	4	P02790|HEMO_HUMAN;Q9BS19|Q9BS19_HUMAN	Carbamidomethylation	C3:Carbamidomethylation:1000.00	FALSE
YYTYLIM(+15.99)NK	49.6	1223.59	9	1.2	612.803	2	18.2769	7750000	50100000	4078	20210614_HS_50ng_F2-2.raw	7	P01024|CO3_HUMAN	Oxidation (M)		FALSE
