# Supplementary material for: Preparative capillary electrophoresis (CE) fractionation of protein digests improves protein and peptide identification in bottom-up proteomics
Source: Royal Society of Chemistry journal article supplement (doi:10.1039/d1ay02145a), 2022-01-01
Supplement: d1ay02145a5.xlsx [file d1ay02145a5.xlsx]

## Sheet: SI_Fractions_repC_peptides_and_
Peptide	-10LgP	Mass	Length	ppm	m/z	z	RT	Area C_Combined_Fractions	Intensity C_Combined_Fractions	Scan	Source File	#Spec	Accession	PTM	AScore	Decoy
AADDTWEPFASGK	63.01	1393.62	13	2.5	697.817	2	18.8973	15500000	130000000	4364	20210616_HS_C_50ng_F2-2.raw	31	P02766|TTHY_HUMAN;A0A087WT59|A0A087WT59_HUMAN			FALSE
AAFTE(+21.98)C(+57.02)C(+57.02)QAADK	49.45	1392.54	12	-3.4	697.276	2	5.9582	17000000	67500000	958	20210616_HS_C_50ng_F3-3.raw	22	A0A0C4DGB6|A0A0C4DGB6_HUMAN;P02768|ALBU_HUMAN;D6RHD5|D6RHD5_HUMAN;B7WNR0|B7WNR0_HUMAN;H0YA55|H0YA55_HUMAN	Sodium adduct; Carbamidomethylation; Carbamidomethylation	E5:Sodium adduct:53.79;C6:Carbamidomethylation:1000.00;C7:Carbamidomethylation:1000.00	FALSE
AAFTEC(+57.02)C(+57.02)QAADK	66.94	1370.56	12	-7.2	686.282	2	5.2869	139000000	562000000	1493	20210616_HS_C_50ng_F3-1.raw	145	A0A0C4DGB6|A0A0C4DGB6_HUMAN;P02768|ALBU_HUMAN;D6RHD5|D6RHD5_HUMAN;B7WNR0|B7WNR0_HUMAN;H0YA55|H0YA55_HUMAN	Carbamidomethylation; Carbamidomethylation	C6:Carbamidomethylation:1000.00;C7:Carbamidomethylation:1000.00	FALSE
AAISGENAGLVR	64.27	1156.62	12	3.6	579.319	2	10.7503	4140000	5680000	2243	20210616_HS_C_50ng_F2-2.raw	3	P19827|ITIH1_HUMAN;F8WAS2|F8WAS2_HUMAN			FALSE
AAPSVTLFPPSSE(+21.98)ELQANK	38.88	2006.99	19	3.3	670.007	3	22.2964	6350000	13700000	4881	20210616_HS_C_50ng_F4-1.raw	6		Sodium adduct	E13:Sodium adduct:14.02	FALSE
AAPSVTLFPPSSEELQANK	53.98	1985.01	19	1.5	993.514	2	22.3184	169000000	834000000	4857	20210616_HS_C_50ng_F4-1.raw	37				FALSE
AAQVTIQSSGTFSSK	73.86	1510.76	15	-1.8	756.387	2	14.314	6470000	25800000	2799	20210616_HS_C_50ng_F3-1.raw	13	P01023|A2MG_HUMAN			FALSE
AATVGSLAGQPLQER	52.46	1496.79	15	0.4	749.405	2	16.9367	326000	2800000	3320	20210616_HS_C_50ng_F3-1.raw	3	P02649|APOE_HUMAN;H0Y7L5|H0Y7L5_HUMAN			FALSE
AAVYHHFISDGVR	60.65	1470.74	13	-0.9	491.252	3	15.461	3070000	17600000	2729	20210616_HS_C_50ng_F1-2.raw	6	P01024|CO3_HUMAN			FALSE
AC(+57.02)EPGVDYVYK	52.53	1299.58	11	-2.7	650.796	2	15.5708	11600000	42000000	2976	20210616_HS_C_50ng_F3-3.raw	8	P01024|CO3_HUMAN;M0QXZ3|M0QXZ3_HUMAN	Carbamidomethylation	C2:Carbamidomethylation:1000.00	FALSE
ADDKETC(+57.02)FAEEGK	59.51	1498.62	13	4.1	750.323	2	5.2787	24100000	45300000	1076	20210616_HS_C_50ng_F2-2.raw	47	A0A087WWT3|A0A087WWT3_HUMAN;P02768|ALBU_HUMAN;C9JKR2|C9JKR2_HUMAN;D6RHD5|D6RHD5_HUMAN;B7WNR0|B7WNR0_HUMAN;H0YA55|H0YA55_HUMAN	Carbamidomethylation	C7:Carbamidomethylation:1000.00	FALSE
ADDKETC(+57.02)FAEEGKK	37.33	1626.72	14	-1.9	543.246	3	5.629	7020000	2920000	1098	20210616_HS_C_50ng_F1-3.raw	8	A0A087WWT3|A0A087WWT3_HUMAN;P02768|ALBU_HUMAN;C9JKR2|C9JKR2_HUMAN;D6RHD5|D6RHD5_HUMAN;B7WNR0|B7WNR0_HUMAN;H0YA55|H0YA55_HUMAN	Carbamidomethylation	C7:Carbamidomethylation:1000.00	FALSE
ADGSYAAWLSR	55.34	1195.56	11	3.6	598.79	2	19.2957	1180000	8630000	4475	20210616_HS_C_50ng_F2-2.raw	4	A0A140TA32|A0A140TA32_HUMAN;A0A140TA29|A0A140TA29_HUMAN;P0C0L4|CO4A_HUMAN;P0C0L5|CO4B_HUMAN;A0A0G2JPR0|A0A0G2JPR0_HUMAN;A0A140TA49|A0A140TA49_HUMAN;F5GXS0|F5GXS0_HUMAN;A0A140TA44|A0A140TA44_HUMAN;A0A3B3ISA6|A0A3B3ISA6_HUMAN;A0A0G2JL54|A0A0G2JL54_HUMAN			FALSE
ADLFYDVEALDLESPK	58.39	1823.88	16	5.9	912.954	2	26.5854			6154	20210616_HS_C_50ng_F4-2.raw	1	P04196|HRG_HUMAN			FALSE
ADLSGITGAR	44.11	959.504	10	1.3	480.76	2	7.9575	8700000	31500000	1834	20210616_HS_C_50ng_F2-2.raw	14	G3V3A0|G3V3A0_HUMAN;P01011|AACT_HUMAN			FALSE
ADRDQYELLC(+57.02)LDNTR	71.23	1880.87	15	0.3	627.964	3	20.1342	16700000	210000000	4737	20210616_HS_C_50ng_F2-2.raw	19	C9JVG0|C9JVG0_HUMAN;P02787|TRFE_HUMAN	Carbamidomethylation	C10:Carbamidomethylation:1000.00	FALSE
ADSVVDLLSYNVQGSGETTYDHK	64.98	2497.16	23	1.6	833.396	3	23.2762	294000	2580000	5272	20210616_HS_C_50ng_F3-1.raw	1	P04114|APOB_HUMAN			FALSE
AEAQAQYSAAVAK	44.09	1306.65	13	-0.4	654.333	2	5.9032	576000	2280000	988	20210616_HS_C_50ng_F3-2.raw	5	Q14624|ITIH4_HUMAN;B7ZKJ8|B7ZKJ8_HUMAN			FALSE
AEATTLHVAPQGTAM(+15.99)AVSTFR	45.72	2174.08	21	-0.8	725.7	3	19.4281			4531	20210616_HS_C_50ng_F2-2.raw	2	P07360|CO8G_HUMAN	Oxidation (M)		FALSE
AEDHFSVIDFNQNIR	55.86	1803.85	15	4.6	602.295	3	22.164	831000	4270000	5309	20210616_HS_C_50ng_F2-2.raw	2	Q5T985|Q5T985_HUMAN;P19823|ITIH2_HUMAN			FALSE
AEDTAVYYC(+57.02)AK	49.34	1289.56	11	2	645.788	2	7.5439	269000	1200000	1427	20210616_HS_C_50ng_F3-3.raw	2		Carbamidomethylation	C9:Carbamidomethylation:1000.00	FALSE
AEDTAVYYC(+57.02)AR	47.91	1317.57	11	4	659.793	2	8.1334	2350000	10400000	1674	20210616_HS_C_50ng_F3-3.raw	7		Carbamidomethylation	C9:Carbamidomethylation:1000.00	FALSE
AEFAE(+21.98)VSK	42.33	901.416	8	1.6	451.717	2	6.1088	27200000	100000000	1349	20210616_HS_C_50ng_F2-3.raw	22	A0A0C4DGB6|A0A0C4DGB6_HUMAN;P02768|ALBU_HUMAN;C9JKR2|C9JKR2_HUMAN;D6RHD5|D6RHD5_HUMAN;B7WNR0|B7WNR0_HUMAN;H0YA55|H0YA55_HUMAN	Sodium adduct	E5:Sodium adduct:34.63	FALSE
AEFAEVSK	51	879.434	8	2.5	440.725	2	20.5982	118000000	649000000	4874	20210616_HS_C_50ng_F2-2.raw	92	A0A0C4DGB6|A0A0C4DGB6_HUMAN;P02768|ALBU_HUMAN;C9JKR2|C9JKR2_HUMAN;D6RHD5|D6RHD5_HUMAN;B7WNR0|B7WNR0_HUMAN;H0YA55|H0YA55_HUMAN			FALSE
AEFAEVSKLVTDLTK	55.54	1649.89	15	4.3	550.972	3	25.6631	102000	1030000	6169	20210616_HS_C_50ng_F2-1.raw	2	A0A0C4DGB6|A0A0C4DGB6_HUMAN;P02768|ALBU_HUMAN;C9JKR2|C9JKR2_HUMAN;D6RHD5|D6RHD5_HUMAN;B7WNR0|B7WNR0_HUMAN;H0YA55|H0YA55_HUMAN			FALSE
AEFQDALEK	47.57	1049.5	9	1	525.759	2	11.8866	5890000	11700000	2489	20210616_HS_C_50ng_F2-2.raw	8	A0A140TA32|A0A140TA32_HUMAN;A0A140TA29|A0A140TA29_HUMAN;P0C0L4|CO4A_HUMAN;P0C0L5|CO4B_HUMAN;A0A0G2JPR0|A0A0G2JPR0_HUMAN;A0A140TA49|A0A140TA49_HUMAN;F5GXS0|F5GXS0_HUMAN;A0A140TA44|A0A140TA44_HUMAN;A0A0G2JL54|A0A0G2JL54_HUMAN			FALSE
AEM(+15.99)ADQAAAWLTR	62.83	1448.67	13	0.5	483.898	3	18.9806	5140000	34700000	3886	20210616_HS_C_50ng_F3-1.raw	18	A0A140TA32|A0A140TA32_HUMAN;A0A140TA29|A0A140TA29_HUMAN;A0A3B3ISD7|A0A3B3ISD7_HUMAN;P0C0L5|CO4B_HUMAN;A0A0G2JPR0|A0A0G2JPR0_HUMAN;A0A140TA49|A0A140TA49_HUMAN;F5GXS0|F5GXS0_HUMAN;A0A140TA44|A0A140TA44_HUMAN;A0A3B3ISA6|A0A3B3ISA6_HUMAN;A0A0G2JL54|A0A0G2JL54_HUMAN	Oxidation (M)		FALSE
AEPLAFTFSHDYK	31.71	1524.72	13	3.6	509.251	3	21.2039	135000	1020000	5085	20210616_HS_C_50ng_F2-1.raw	1	P04114|APOB_HUMAN			FALSE
AESPEVC(+57.02)FNEESPK	56.08	1621.69	14	3.3	811.856	2	15.7094	842000	6340000	2996	20210616_HS_C_50ng_F3-1.raw	3	P43652|AFAM_HUMAN	Carbamidomethylation	C7:Carbamidomethylation:1000.00	FALSE
AFDIC(+57.02)PLVK	47.24	1061.56	9	-1.3	531.785	2	21.2819	101000	1570000	5062	20210616_HS_C_50ng_F2-2.raw	3	P01031|CO5_HUMAN	Carbamidomethylation	C5:Carbamidomethylation:1000.00	FALSE
AGALNSNDAFVLK	55.55	1318.69	13	-0.6	660.351	2	19.325	1960000	21100000	3998	20210616_HS_C_50ng_F3-1.raw	6	A0A0A0MS51|A0A0A0MS51_HUMAN;P06396|GELS_HUMAN;A0A0A0MT01|A0A0A0MT01_HUMAN			FALSE
AGDFLEANYM(+15.99)NLQR	59.9	1656.76	14	3.1	829.388	2	19.9147	23100000	174000000	3996	20210616_HS_C_50ng_F4-1.raw	20	M0R0Q9|M0R0Q9_HUMAN;P01024|CO3_HUMAN	Oxidation (M)		FALSE
AGDFLEANYMNLQR	41.64	1640.76	14	0.5	821.389	2	22.2251	442000	4770000	4941	20210616_HS_C_50ng_F3-1.raw	3	M0R0Q9|M0R0Q9_HUMAN;P01024|CO3_HUMAN			FALSE
AGEQVTYTC(+57.02)ATYYK	51.03	1653.73	14	4.7	827.878	2	15.8305	329000	2030000	3067	20210616_HS_C_50ng_F3-3.raw	2	P08603|CFAH_HUMAN	Carbamidomethylation	C9:Carbamidomethylation:1000.00	FALSE
AGEVQEPELR	42.35	1126.56	10	5.2	564.292	2	7.7657	1830000	5250000	1685	20210616_HS_C_50ng_F2-3.raw	5	P25311|ZA2G_HUMAN			FALSE
AGLLRPDYALLGHR	65.62	1550.87	14	1.7	517.964	3	21.1955	238000	2100000	4183	20210616_HS_C_50ng_F1-1.raw	3	Q96PD5|PGRP2_HUMAN			FALSE
AHLDIAGSLEGHLR	70.32	1487.78	14	2	496.936	3	20.2167	595000	3390000	3938	20210616_HS_C_50ng_F1-3.raw	3	P04114|APOB_HUMAN			FALSE
AHVSFKPTVAQQR	37.86	1467.79	13	-2.7	490.271	3	8.0862	99000	533000	1383	20210616_HS_C_50ng_F1-2.raw	1	Q5T985|Q5T985_HUMAN;Q5T987|Q5T987_HUMAN;P19823|ITIH2_HUMAN			FALSE
AIEDYINEFSVR	64.22	1454.7	12	4.3	728.362	2	23.0562	1220000	9740000	5192	20210616_HS_C_50ng_F3-1.raw	3	P02748|CO9_HUMAN			FALSE
AIGYLN(+0.98)TGYQR	44.51	1255.62	11	1.9	628.818	2	15.8442	990000	4740000	3032	20210616_HS_C_50ng_F3-1.raw	4	P01023|A2MG_HUMAN	Deamidation (NQ)	N6:Deamidation (NQ):22.37	FALSE
AIGYLNTGYQR	57.68	1254.64	11	-2.8	628.323	2	16.4118	33100000	156000000	3590	20210616_HS_C_50ng_F2-2.raw	24	P01023|A2MG_HUMAN			FALSE
AIPVTQYLK	45.29	1031.6	9	1.8	516.809	2	19.1998	561000	5170000	4471	20210616_HS_C_50ng_F2-1.raw	3	P43652|AFAM_HUMAN			FALSE
AKPALEDLR	43.07	1011.57	9	-1	506.792	2	7.9595	4540000	13200000	1425	20210616_HS_C_50ng_F1-2.raw	7	F8W696|F8W696_HUMAN;P02647|APOA1_HUMAN			FALSE
ALEEANADLEVK	41.3	1300.65	12	-0.2	651.333	2	14.9096	266000	1080000	2848	20210616_HS_C_50ng_F3-2.raw	2				FALSE
ALEESNYELEGK	55.64	1380.64	12	-4	691.325	2	12.9184	2430000	8080000	2536	20210616_HS_C_50ng_F3-3.raw	7	#CONTAM#cont|000133|;#CONTAM#cont|000131|;P13645|K1C10_HUMAN;#CONTAM#cont|000129|;#CONTAM#cont|000136|;#CONTAM#cont|000122|			FALSE
ALEILQ(+0.98)EEDLIDEDDIPVR	51.59	2225.09	19	9.3	742.712	3	26.2098			5892	20210616_HS_C_50ng_F4-1.raw	1	A0A140TA32|A0A140TA32_HUMAN;A0A140TA29|A0A140TA29_HUMAN;P0C0L4|CO4A_HUMAN;P0C0L5|CO4B_HUMAN;A0A0G2JPR0|A0A0G2JPR0_HUMAN;A0A140TA49|A0A140TA49_HUMAN;F5GXS0|F5GXS0_HUMAN;A0A140TA44|A0A140TA44_HUMAN;A0A3B3ISA6|A0A3B3ISA6_HUMAN;A0A0G2JL54|A0A0G2JL54_HUMAN	Deamidation (NQ)		FALSE
ALEILQEEDLIDEDDIPVR	70.95	2224.11	19	3	1113.07	2	26.3354	860000	8540000	6067	20210616_HS_C_50ng_F4-3.raw	6	A0A140TA32|A0A140TA32_HUMAN;A0A140TA29|A0A140TA29_HUMAN;P0C0L4|CO4A_HUMAN;P0C0L5|CO4B_HUMAN;A0A0G2JPR0|A0A0G2JPR0_HUMAN;A0A140TA49|A0A140TA49_HUMAN;F5GXS0|F5GXS0_HUMAN;A0A140TA44|A0A140TA44_HUMAN;A0A3B3ISA6|A0A3B3ISA6_HUMAN;A0A0G2JL54|A0A0G2JL54_HUMAN			FALSE
ALEWLAR	38.48	857.476	7	0.9	429.747	2	19.136			4458	20210616_HS_C_50ng_F2-3.raw	3				FALSE
ALLAFQESK	36.24	1005.55	9	-0.3	503.783	2	17.1111	218000	1790000	3841	20210616_HS_C_50ng_F2-3.raw	1				FALSE
ALLAYAFALAGNQDK	63.78	1564.83	15	3.8	783.423	2	25.6619	231000	2170000	5854	20210616_HS_C_50ng_F3-1.raw	3	P01023|A2MG_HUMAN			FALSE
ALPAPIEK	39.91	837.496	8	-2.7	419.755	2	9.7831	41000000	242000000	2112	20210616_HS_C_50ng_F2-3.raw	26	P01857|IGHG1_HUMAN;A0A0A0MS08|A0A0A0MS08_HUMAN;A0A0A0MS07|A0A0A0MS07_HUMAN			FALSE
ALQDQLVLVAAK	50.9	1267.75	12	3.7	634.885	2	20.7804	2280000	22200000	4458	20210616_HS_C_50ng_F3-1.raw	6	P01019|ANGT_HUMAN			FALSE
ALVEQGFTVPEIK	52.23	1429.78	13	-4.4	715.895	2	22.6168	2070000	18900000	5054	20210616_HS_C_50ng_F3-1.raw	5	P04114|APOB_HUMAN			FALSE
ALYLQYTDETFR	56.75	1518.74	12	6.4	760.38	2	21.5819	2470000	20100000	4527	20210616_HS_C_50ng_F4-1.raw	10	E9PFZ2|E9PFZ2_HUMAN;P00450|CERU_HUMAN			FALSE
ALYWVN(+0.98)GQVPDGVSK	59.86	1632.81	15	4.2	817.418	2	21.462	491000	5860000	4690	20210616_HS_C_50ng_F3-1.raw	4	A8MUN2|A8MUN2_HUMAN;P04114|APOB_HUMAN	Deamidation (NQ)	N6:Deamidation (NQ):14.04	FALSE
ALYWVNGQ(+0.98)VPDGVSK	59.61	1632.81	15	1.2	817.416	2	21.4534	158000	1700000	4574	20210616_HS_C_50ng_F4-2.raw	2	A8MUN2|A8MUN2_HUMAN;P04114|APOB_HUMAN	Deamidation (NQ)	Q8:Deamidation (NQ):0.00	FALSE
AM(+15.99)AVEDIISR	51.2	1119.56	10	3.5	560.789	2	15.3819	1520000	5540000	3306	20210616_HS_C_50ng_F2-2.raw	6		Oxidation (M)		FALSE
ANPTVTLFPPSSEELQANK	54.52	2042.03	19	1.8	1022.03	2	22.3356	28900000	77200000	5001	20210616_HS_C_50ng_F4-2.raw	11	A0A0B4J231|A0A0B4J231_HUMAN;B9A064|IGLL5_HUMAN			FALSE
ANTVQEATFQM(+15.99)ELPK	62.85	1721.83	15	2.9	861.924	2	18.8123	3650000	30700000	3833	20210616_HS_C_50ng_F3-1.raw	3	Q14624|ITIH4_HUMAN;B7ZKJ8|B7ZKJ8_HUMAN	Oxidation (M)		FALSE
APDVFPIISGC(+57.02)R	46.7	1330.67	12	2	666.344	2	22.2245	329000	2540000	4990	20210616_HS_C_50ng_F3-2.raw	3	A0A0A0MS09|A0A0A0MS09_HUMAN;P01880|IGHD_HUMAN	Carbamidomethylation	C11:Carbamidomethylation:1000.00	FALSE
APSTWLTAYVVK	55.25	1334.72	12	3.2	668.371	2	23.6928	1390000	10300000	5384	20210616_HS_C_50ng_F3-1.raw	6	P01024|CO3_HUMAN			FALSE
AQLGDLPWQVAIK	48.63	1437.8	13	0.1	719.906	2	25.1442	169000	2000000	5797	20210616_HS_C_50ng_F3-2.raw	3	G3XAM2|G3XAM2_HUMAN;A0A2R8Y3M9|A0A2R8Y3M9_HUMAN;E7ETH0|E7ETH0_HUMAN;P05156|CFAI_HUMAN			FALSE
AQPVQVAEGSEPDGFWEALGGK	46.8	2271.08	22	0.6	758.035	3	24.7693	378000	3300000	5515	20210616_HS_C_50ng_F4-1.raw	3	A0A0A0MS51|A0A0A0MS51_HUMAN;P06396|GELS_HUMAN;A0A0A0MT01|A0A0A0MT01_HUMAN			FALSE
AQTTVTC(+57.02)M(+15.99)EN(+0.98)GWSPTPR	55.87	1951.84	17	0.8	976.928	2	16.1751	551000	3300000	3068	20210616_HS_C_50ng_F4-2.raw	3	A0A0D9SG88|A0A0D9SG88_HUMAN;P08603|CFAH_HUMAN;Q5TFM2|Q5TFM2_HUMAN	Carbamidomethylation; Oxidation (M); Deamidation (NQ)	C7:Carbamidomethylation:1000.00;M8:Oxidation (M):1000.00;N10:Deamidation (NQ):24.34	FALSE
ASGSLPYTQTLQDHLNSLK	50.3	2072.05	19	4.4	691.695	3	22.3519	277000	2700000	5426	20210616_HS_C_50ng_F2-1.raw	3	P04114|APOB_HUMAN			FALSE
ASSIIDELFQDR	58.16	1392.69	12	-6.1	697.347	2	25.5427	852000	11800000	5818	20210616_HS_C_50ng_F3-1.raw	5	H0YLK8|H0YLK8_HUMAN;P10909|CLUS_HUMAN;H0YC35|H0YC35_HUMAN;E7ERK6|E7ERK6_HUMAN			FALSE
ASYLDC(+57.02)IR	48.6	996.47	8	0.8	499.243	2	15.5995	8490000	21300000	3395	20210616_HS_C_50ng_F2-2.raw	4	F8WCI6|F8WCI6_HUMAN;P02787|TRFE_HUMAN;F8WEK9|F8WEK9_HUMAN;C9JB55|C9JB55_HUMAN	Carbamidomethylation	C6:Carbamidomethylation:1000.00	FALSE
ATEHLSTLSEK	40.43	1214.61	11	-1.1	608.314	2	5.8769	1160000	889000	957	20210616_HS_C_50ng_F1-3.raw	2	F8W696|F8W696_HUMAN;P02647|APOA1_HUMAN			FALSE
ATFGC(+57.02)HDGYSLDGPEEIEC(+57.02)TK	86.11	2384.99	21	3.2	796.006	3	19.4765	1420000	8540000	4539	20210616_HS_C_50ng_F2-2.raw	3	J3QLI0|J3QLI0_HUMAN;P02749|APOH_HUMAN	Carbamidomethylation; Carbamidomethylation	C5:Carbamidomethylation:1000.00;C19:Carbamidomethylation:1000.00	FALSE
ATFQTPDFIVPLTDLR	50.92	1832.97	16	4.5	917.495	2	28.577	222000	2460000	6379	20210616_HS_C_50ng_F4-1.raw	3	P04114|APOB_HUMAN			FALSE
ATGVLYDYVNK	60.23	1241.63	11	2.3	621.823	2	17.7799	6650000	36600000	4004	20210616_HS_C_50ng_F2-2.raw	8	P04114|APOB_HUMAN			FALSE
ATLYALSHAVNNYHK	41.6	1700.86	15	4.4	567.964	3	18.4469	93300	1220000	3510	20210616_HS_C_50ng_F1-1.raw	2	A8MUN2|A8MUN2_HUMAN;P04114|APOB_HUMAN			FALSE
ATTVTGTPC(+57.02)QDWAAQEPHR	59.79	2124.96	19	1.2	709.33	3	16.7159	1010000	8350000	3693	20210616_HS_C_50ng_F2-2.raw	3	P00747|PLMN_HUMAN	Carbamidomethylation	C9:Carbamidomethylation:1000.00	FALSE
ATVLNYLPK	56.34	1017.59	9	2.7	509.802	2	20.1513	15000000	74100000	4736	20210616_HS_C_50ng_F2-2.raw	3	P01023|A2MG_HUMAN;P20742|PZP_HUMAN			FALSE
ATWSGAVLAGR	59.18	1087.58	11	3	544.798	2	17.5503	4950000	23400000	4046	20210616_HS_C_50ng_F2-2.raw	6	P04217|A1BG_HUMAN			FALSE
AVFVLER	39.88	832.481	7	-2.5	417.247	2	22.8287			5500	20210616_HS_C_50ng_F5-2.raw	4				FALSE
AVGDKLPEC(+57.02)EADDGC(+57.02)PKPPEIAHGYVEHSVR	48.15	3431.59	31	1.9	687.326	5	19.0655	77400	875000	3658	20210616_HS_C_50ng_F1-1.raw	2	P00738|HPT_HUMAN;J3QLC9|J3QLC9_HUMAN;H0Y300|H0Y300_HUMAN;J3KRH2|J3KRH2_HUMAN;J3QR68|J3QR68_HUMAN	Carbamidomethylation; Carbamidomethylation	C9:Carbamidomethylation:1000.00;C15:Carbamidomethylation:1000.00	FALSE
AVISPGFDVFAK	52.83	1249.67	12	2.9	625.844	2	23.3445	295000	2800000	5285	20210616_HS_C_50ng_F3-1.raw	3	E7ETN3|E7ETN3_HUMAN;B4E1Z4|B4E1Z4_HUMAN			FALSE
AVLDVFEEGTEASAATAVK	62.9	1906.95	19	-1.2	636.657	3	22.5897	15900000	137000000	4844	20210616_HS_C_50ng_F4-1.raw	14	G3V3A0|G3V3A0_HUMAN;P01011|AACT_HUMAN			FALSE
AVLTIDEK	44.99	887.496	8	-1	444.755	2	10.3326	47200000	210000000	2155	20210616_HS_C_50ng_F2-2.raw	28				FALSE
AVLYNYR	40.08	897.471	7	-1.3	449.742	2	10.48	4960000	10500000	2260	20210616_HS_C_50ng_F2-2.raw	12	P01024|CO3_HUMAN			FALSE
AVM(+15.99)D(+21.98)DFAAFVEK	38.27	1379.6	12	-7.7	460.872	3	21.0907	19000000	49500000	4778	20210616_HS_C_50ng_F3-1.raw	7	A0A0C4DGB6|A0A0C4DGB6_HUMAN;A0A087WWT3|A0A087WWT3_HUMAN;P02768|ALBU_HUMAN;C9JKR2|C9JKR2_HUMAN;D6RHD5|D6RHD5_HUMAN;B7WNR0|B7WNR0_HUMAN;H0YA55|H0YA55_HUMAN	Oxidation (M); Sodium adduct	M3:Oxidation (M):1000.00;D4:Sodium adduct:0.00	FALSE
AVM(+15.99)DD(+21.98)FAAFVEK	52.5	1379.6	12	3.6	690.812	2	21.046	31700000	191000000	4576	20210616_HS_C_50ng_F3-3.raw	18	A0A0C4DGB6|A0A0C4DGB6_HUMAN;A0A087WWT3|A0A087WWT3_HUMAN;P02768|ALBU_HUMAN;C9JKR2|C9JKR2_HUMAN;D6RHD5|D6RHD5_HUMAN;B7WNR0|B7WNR0_HUMAN;H0YA55|H0YA55_HUMAN	Oxidation (M); Sodium adduct	M3:Oxidation (M):1000.00;D5:Sodium adduct:12.28	FALSE
AVM(+15.99)DDFAAFVEK	66.06	1357.62	12	-6.9	679.814	2	21.6399	434000000	2190000000	5199	20210616_HS_C_50ng_F3-1.raw	198	A0A0C4DGB6|A0A0C4DGB6_HUMAN;A0A087WWT3|A0A087WWT3_HUMAN;P02768|ALBU_HUMAN;C9JKR2|C9JKR2_HUMAN;D6RHD5|D6RHD5_HUMAN;B7WNR0|B7WNR0_HUMAN;H0YA55|H0YA55_HUMAN	Oxidation (M)		FALSE
AVMD(+21.98)DFAAFVEK	45.08	1363.61	12	3.8	682.815	2	23.753	219000	2410000	5427	20210616_HS_C_50ng_F3-3.raw	2	A0A0C4DGB6|A0A0C4DGB6_HUMAN;A0A087WWT3|A0A087WWT3_HUMAN;P02768|ALBU_HUMAN;C9JKR2|C9JKR2_HUMAN;D6RHD5|D6RHD5_HUMAN;B7WNR0|B7WNR0_HUMAN;H0YA55|H0YA55_HUMAN	Sodium adduct	D4:Sodium adduct:0.00	FALSE
AVMDD(+21.98)FAAFVEK	47.9	1363.61	12	3.1	682.814	2	23.813	315000	3010000	5418	20210616_HS_C_50ng_F3-1.raw	2	A0A0C4DGB6|A0A0C4DGB6_HUMAN;A0A087WWT3|A0A087WWT3_HUMAN;P02768|ALBU_HUMAN;C9JKR2|C9JKR2_HUMAN;D6RHD5|D6RHD5_HUMAN;B7WNR0|B7WNR0_HUMAN;H0YA55|H0YA55_HUMAN	Sodium adduct	D5:Sodium adduct:10.11	FALSE
AVMDDFAAFVEK	65.12	1341.63	12	0.3	671.823	2	23.8356	13100000	146000000	5763	20210616_HS_C_50ng_F5-3.raw	32	A0A0C4DGB6|A0A0C4DGB6_HUMAN;A0A087WWT3|A0A087WWT3_HUMAN;P02768|ALBU_HUMAN;C9JKR2|C9JKR2_HUMAN;D6RHD5|D6RHD5_HUMAN;B7WNR0|B7WNR0_HUMAN;H0YA55|H0YA55_HUMAN			FALSE
AVSM(+15.99)PSFSILGSDVR	47.73	1580.79	15	2.6	791.403	2	22.3824	5030000	75900000	5040	20210616_HS_C_50ng_F3-1.raw	10	P04114|APOB_HUMAN	Oxidation (M)		FALSE
AYLEEEC(+57.02)PATLR	50.29	1450.68	12	-2.2	726.344	2	17.0826	1480000	11200000	3404	20210616_HS_C_50ng_F3-3.raw	4	C9JEV0|C9JEV0_HUMAN;P25311|ZA2G_HUMAN	Carbamidomethylation	C7:Carbamidomethylation:1000.00	FALSE
AYSLFSYNTQGR	51.81	1405.66	12	0.7	703.839	2	19.8233	454000	4910000	4174	20210616_HS_C_50ng_F3-1.raw	2	P02743|SAMP_HUMAN			FALSE
AYYENSPQQVFSTEFEVK	50.14	2165	18	5.7	722.677	3	23.4628	138000	1880000	5230	20210616_HS_C_50ng_F4-2.raw	2	P01024|CO3_HUMAN			FALSE
C(+57.02)C(+57.02)TESLVNR	53.59	1137.49	9	7.6	569.757	2	5.9528	5230000	4890000	1759	20210616_HS_C_50ng_F2-2.raw	3	A0A0C4DGB6|A0A0C4DGB6_HUMAN;#CONTAM#cont|000097|;#CONTAM#cont|000035|;A0A087WWT3|A0A087WWT3_HUMAN;P02768|ALBU_HUMAN;#CONTAM#cont|000017|;C9JKR2|C9JKR2_HUMAN;D6RHD5|D6RHD5_HUMAN;B7WNR0|B7WNR0_HUMAN;H0YA55|H0YA55_HUMAN	Carbamidomethylation; Carbamidomethylation	C1:Carbamidomethylation:1000.00;C2:Carbamidomethylation:1000.00	FALSE
C(+57.02)DEWSVNSVGK	53.65	1279.55	11	2.8	640.784	2	18.1666	430000	3310000	3631	20210616_HS_C_50ng_F4-3.raw	4	P02787|TRFE_HUMAN	Carbamidomethylation	C1:Carbamidomethylation:1000.00	FALSE
D(+21.98)DNPNLPR	38.65	961.423	8	-2.5	481.717	2	13.6439	8430	70300	2537	20210616_HS_C_50ng_F4-2.raw	1	A0A0C4DGB6|A0A0C4DGB6_HUMAN;A0A087WWT3|A0A087WWT3_HUMAN;P02768|ALBU_HUMAN;H7C013|H7C013_HUMAN	Sodium adduct	D1:Sodium adduct:0.00	FALSE
D(+21.98)IQM(+15.99)TQSPSSLSASVGDR	54.16	1915.86	18	0.2	639.626	3	16.134	6990000	59700000	3050	20210616_HS_C_50ng_F4-2.raw	8	A0A2Q2TTZ9|A0A2Q2TTZ9_HUMAN	Sodium adduct; Oxidation (M)	D1:Sodium adduct:85.10;M4:Oxidation (M):1000.00	FALSE
D(+21.98)IVM(+15.99)TQSPLSLPVTPGEPASISC(+57.02)R	43.93	2592.25	24	6.5	865.097	3	24.2018	325000	3150000	5367	20210616_HS_C_50ng_F4-1.raw	3	A0A5H1ZRS2|A0A5H1ZRS2_HUMAN	Sodium adduct; Oxidation (M); Carbamidomethylation	D1:Sodium adduct:42.33;M4:Oxidation (M):1000.00;C23:Carbamidomethylation:1000.00	FALSE
D(+21.98)TEEEDFHVDQVTTVK	49.63	1912.83	16	0.9	638.618	3	17.5962	395000	4170000	3994	20210616_HS_C_50ng_F2-1.raw	2		Sodium adduct	D1:Sodium adduct:0.00	FALSE
DADPDTFFAK	51.44	1125.5	10	6.1	563.76	2	17.0262	2030000	6750000	3384	20210616_HS_C_50ng_F3-3.raw	3	P43652|AFAM_HUMAN			FALSE
DAEAWFNEK	47.77	1108.48	9	5.5	555.252	2	16.9504	700000	2970000	3365	20210616_HS_C_50ng_F3-3.raw	6	#CONTAM#cont|000133|;P13645|K1C10_HUMAN;#CONTAM#cont|000129|;#CONTAM#cont|000136|;#CONTAM#cont|000122|;#CONTAM#cont|000130|			FALSE
DALSSVQE(+21.98)SQVAQQAR	47.96	1737.83	16	1	580.283	3	15.8631	163000	1250000	3005	20210616_HS_C_50ng_F4-2.raw	2	P02656|APOC3_HUMAN;B0YIW2|B0YIW2_HUMAN	Sodium adduct	E8:Sodium adduct:52.22	FALSE
DALSSVQESQVAQQAR	65.77	1715.84	16	1.2	858.93	2	15.8755	2820000	16300000	2993	20210616_HS_C_50ng_F4-2.raw	6	P02656|APOC3_HUMAN;B0YIW2|B0YIW2_HUMAN			FALSE
DASGATFTWTPSSGK	70.3	1511.69	15	1.7	756.853	2	18.1602	4270000	21000000	3476	20210616_HS_C_50ng_F4-1.raw	6				FALSE
DASGVTFTWTPSSGK	69.6	1539.72	15	1.5	770.869	2	20.0912	39300000	300000000	4036	20210616_HS_C_50ng_F4-1.raw	23	P01876|IGHA1_HUMAN;A0A286YEY1|A0A286YEY1_HUMAN			FALSE
DC(+57.02)HLAQVPSHTVVAR	76.02	1688.84	15	-1	563.954	3	15.0527	16700000	131000000	2788	20210616_HS_C_50ng_F1-2.raw	20	P02787|TRFE_HUMAN	Carbamidomethylation	C2:Carbamidomethylation:1000.00	FALSE
DD(+21.98)NPNLPR	43.76	961.423	8	1.7	481.721	2	5.7224	144000000	655000000	1127	20210616_HS_C_50ng_F2-3.raw	49	A0A0C4DGB6|A0A0C4DGB6_HUMAN;A0A087WWT3|A0A087WWT3_HUMAN;P02768|ALBU_HUMAN;H7C013|H7C013_HUMAN	Sodium adduct	D2:Sodium adduct:17.01	FALSE
DDFLIYDR	47.62	1055.49	8	3.9	528.755	2	19.1194	156000	1120000	4016	20210616_HS_C_50ng_F3-3.raw	3	A0A182DWH7|A0A182DWH7_HUMAN;P49908|SEPP1_HUMAN			FALSE
DDLYVSDAFHK	58.58	1308.6	11	1.1	437.207	3	17.1813	2210000	18600000	3833	20210616_HS_C_50ng_F2-2.raw	7	P01008|ANT3_HUMAN			FALSE
DDNPNLPR	59.78	939.441	8	-0.6	470.728	2	11.235	348000000	1560000000	2411	20210616_HS_C_50ng_F2-2.raw	151	A0A0C4DGB6|A0A0C4DGB6_HUMAN;A0A087WWT3|A0A087WWT3_HUMAN;P02768|ALBU_HUMAN;H7C013|H7C013_HUMAN			FALSE
DDTVC(+57.02)LAK	43.34	920.427	8	0	461.221	2	5.9381	4390000	9190000	1084	20210616_HS_C_50ng_F3-3.raw	13	P02787|TRFE_HUMAN	Carbamidomethylation	C5:Carbamidomethylation:1000.00	FALSE
DEELSC(+57.02)TVVELK	54.85	1420.68	12	0.4	711.345	2	18.9824	177000	2850000	3796	20210616_HS_C_50ng_F4-2.raw	3	G3V595|G3V595_HUMAN;G3V3A0|G3V3A0_HUMAN;P01011|AACT_HUMAN	Carbamidomethylation	C6:Carbamidomethylation:1000.00	FALSE
DEPTYILNIK	42.77	1204.63	10	3.8	603.327	2	20.6244	235000	2250000	4450	20210616_HS_C_50ng_F3-1.raw	1	A8MUN2|A8MUN2_HUMAN;P04114|APOB_HUMAN			FALSE
DFDFVPPVVR	66.36	1189.61	10	3.4	595.816	2	26.5582	13600000	192000000	5754	20210616_HS_C_50ng_F3-1.raw	19	P01024|CO3_HUMAN			FALSE
DFVQPPTK	42.86	930.481	8	6.6	466.251	2	7.626	161000	363000	1632	20210616_HS_C_50ng_F2-2.raw	1	P01042|KNG1_HUMAN			FALSE
DGAGDVAFVK	58.29	977.482	10	-0.5	489.748	2	11.235	59500000	221000000	2329	20210616_HS_C_50ng_F2-2.raw	61	C9JVG0|C9JVG0_HUMAN;P02787|TRFE_HUMAN			FALSE
DGFFGNPR	51.13	908.414	8	0	455.214	2	13.1917	4350000	7280000	2830	20210616_HS_C_50ng_F2-2.raw	10	P01871|IGHM_HUMAN			FALSE
DGSPDVTTADIGANTPDATK	54.73	1944.89	20	1.9	973.455	2	16.1515	763000	4470000	3133	20210616_HS_C_50ng_F4-3.raw	3	Q96PD5|PGRP2_HUMAN			FALSE
DGWSAQPTC(+57.02)IK	44.2	1261.58	11	3.2	631.797	2	15.0948	809000	2380000	2886	20210616_HS_C_50ng_F3-3.raw	3	P08603|CFAH_HUMAN	Carbamidomethylation	C9:Carbamidomethylation:1000.00	FALSE
DGYLFQLLR	56.11	1123.6	9	5.4	562.812	2	25.8779	628000	3100000	5894	20210616_HS_C_50ng_F3-3.raw	3	P04196|HRG_HUMAN			FALSE
DIAPTLTLYVGK	53.9	1289.72	12	3.2	645.871	2	22.6644	15600000	197000000	5089	20210616_HS_C_50ng_F3-1.raw	15	P00738|HPT_HUMAN;J3QLC9|J3QLC9_HUMAN;H3BS21|H3BS21_HUMAN;A0A087WU08|A0A087WU08_HUMAN;H0Y300|H0Y300_HUMAN;A0A0C4DGL8|A0A0C4DGL8_HUMAN;J3QR68|J3QR68_HUMAN			FALSE
DIASGLIGPLIIC(+57.02)K	72.28	1468.83	14	3.5	735.426	2	26.4441	1160000	6560000	5940	20210616_HS_C_50ng_F4-1.raw	4	E9PFZ2|E9PFZ2_HUMAN;P00450|CERU_HUMAN	Carbamidomethylation	C13:Carbamidomethylation:1000.00	FALSE
DIC(+57.02)EEQVN(+0.98)SLPGSITK	63.39	1789.84	16	2.8	895.93	2	18.515	631000	3540000	3578	20210616_HS_C_50ng_F4-1.raw	3	M0R0Q9|M0R0Q9_HUMAN;P01024|CO3_HUMAN	Carbamidomethylation; Deamidation (NQ)	C3:Carbamidomethylation:1000.00;N8:Deamidation (NQ):32.28	FALSE
DIC(+57.02)EEQVNSLPGSITK	72.87	1788.86	16	1.4	895.437	2	18.905	10800000	119000000	3753	20210616_HS_C_50ng_F4-2.raw	14	M0R0Q9|M0R0Q9_HUMAN;P01024|CO3_HUMAN	Carbamidomethylation	C3:Carbamidomethylation:1000.00	FALSE
DIFTGLIGPM(+15.99)K	55.15	1206.63	11	2.2	604.324	2	22.8773	6210000	29900000	5168	20210616_HS_C_50ng_F3-3.raw	7	E9PFZ2|E9PFZ2_HUMAN;H7C5R1|H7C5R1_HUMAN;P00450|CERU_HUMAN	Oxidation (M)		FALSE
DINYVNPVIK	50.7	1173.64	10	4.4	587.83	2	18.7599	1010000	7630000	3898	20210616_HS_C_50ng_F3-3.raw	3	P01031|CO5_HUMAN			FALSE
DIPM(+15.99)NPM(+15.99)C(+57.02)IYR	40.76	1440.62	11	-1.2	721.316	2	16.9069	3850000	11200000	3328	20210616_HS_C_50ng_F3-2.raw	3	P01008|ANT3_HUMAN;Q8TCE1|Q8TCE1_HUMAN	Oxidation (M); Oxidation (M); Carbamidomethylation	C8:Carbamidomethylation:1000.00	FALSE
DIPTNSPELEETLTHTITK	66.94	2138.07	19	-6.6	713.694	3	22.7186	4560000	48100000	5120	20210616_HS_C_50ng_F3-1.raw	7	P01042|KNG1_HUMAN			FALSE
DIQM(+15.99)TQSPSSLSASVGDR	73.22	1893.87	18	1.3	947.945	2	15.6836	61800000	334000000	3105	20210616_HS_C_50ng_F4-2.raw	36	A0A2Q2TTZ9|A0A2Q2TTZ9_HUMAN	Oxidation (M)		FALSE
DIQMTQ(+0.98)SPSSLSASVGDR	48.18	1878.86	18	7.2	627.299	3	18.4342	23500	235000	3639	20210616_HS_C_50ng_F4-2.raw	1	A0A2Q2TTZ9|A0A2Q2TTZ9_HUMAN	Deamidation (NQ)	Q6:Deamidation (NQ):19.05	FALSE
DIQMTQSPSSLSASVGDR	63.26	1877.88	18	1.9	939.948	2	18.3956	798000	8020000	3690	20210616_HS_C_50ng_F4-3.raw	12	A0A2Q2TTZ9|A0A2Q2TTZ9_HUMAN			FALSE
DISEVVTPR	46.48	1014.53	9	1.9	508.276	2	15.0662	5730000	15300000	2859	20210616_HS_C_50ng_F3-1.raw	20	H7C5H1|H7C5H1_HUMAN;E7ETN3|E7ETN3_HUMAN;P00751|CFAB_HUMAN;B4E1Z4|B4E1Z4_HUMAN			FALSE
DIVM(+15.99)TQSPLSLPVTPGEPASISC(+57.02)R	48.95	2570.27	24	2.5	857.767	3	24.283	5020000	38700000	5525	20210616_HS_C_50ng_F4-3.raw	6	A0A5H1ZRS2|A0A5H1ZRS2_HUMAN	Oxidation (M); Carbamidomethylation	C23:Carbamidomethylation:1000.00	FALSE
DKDQEVLLQTFLDDASPGDK	40.98	2233.07	20	3.4	745.368	3	25.9597	52800	558000	5934	20210616_HS_C_50ng_F3-1.raw	1	A8MUN2|A8MUN2_HUMAN;P04114|APOB_HUMAN			FALSE
DLATVYVDVLK	51.67	1234.68	11	2.5	618.349	2	23.7708	4010000	38200000	5431	20210616_HS_C_50ng_F3-3.raw	4	P02647|APOA1_HUMAN			FALSE
DLGEE(+21.98)NFK	42.49	972.416	8	2.7	487.217	2	7.1893	83700000	447000000	1591	20210616_HS_C_50ng_F2-2.raw	35	A0A0C4DGB6|A0A0C4DGB6_HUMAN;A0A087WWT3|A0A087WWT3_HUMAN;P02768|ALBU_HUMAN;H7C013|H7C013_HUMAN;C9JKR2|C9JKR2_HUMAN;B7WNR0|B7WNR0_HUMAN	Sodium adduct	E5:Sodium adduct:9.34	FALSE
DLGEENFK	44.63	950.434	8	0.2	476.225	2	13.0905	218000000	1240000000	2326	20210616_HS_C_50ng_F3-1.raw	148	A0A0C4DGB6|A0A0C4DGB6_HUMAN;A0A087WWT3|A0A087WWT3_HUMAN;P02768|ALBU_HUMAN;H7C013|H7C013_HUMAN;C9JKR2|C9JKR2_HUMAN;B7WNR0|B7WNR0_HUMAN			FALSE
DLKVEDIPLAR	37.34	1267.71	11	-0.3	423.578	3	19.9692	222000	1980000	4741	20210616_HS_C_50ng_F2-1.raw	3	P04114|APOB_HUMAN			FALSE
DLLFRDDTVC(+57.02)LAK	47.43	1564.79	13	5.7	783.408	2	21.9592	2180000	13700000	5245	20210616_HS_C_50ng_F2-2.raw	6	P02787|TRFE_HUMAN	Carbamidomethylation	C10:Carbamidomethylation:1000.00	FALSE
DLTGFPGPLN(+0.98)DQDN(+0.98)EDC(+57.02)INR	59.43	2290.96	20	5	764.666	3	21.5256	341000	1100000	4505	20210616_HS_C_50ng_F4-1.raw	3	P01023|A2MG_HUMAN	Deamidation (NQ); Deamidation (NQ); Carbamidomethylation	N10:Deamidation (NQ):26.31;N14:Deamidation (NQ):26.31;C17:Carbamidomethylation:1000.00	FALSE
DLTGFPGPLND(+21.98)QDN(+0.98)EDC(+57.02)INR	46.47	2311.96	20	-1.8	771.66	3	21.6245	478000	4490000	4547	20210616_HS_C_50ng_F4-1.raw	3	P01023|A2MG_HUMAN	Sodium adduct; Deamidation (NQ); Carbamidomethylation	D11:Sodium adduct:0.00;N14:Deamidation (NQ):22.85;C17:Carbamidomethylation:1000.00	FALSE
DLTGFPGPLNDQDN(+0.98)EDC(+57.02)INR	80.22	2289.98	20	1	1146	2	21.6152	10800000	81300000	4531	20210616_HS_C_50ng_F4-1.raw	11	P01023|A2MG_HUMAN	Deamidation (NQ); Carbamidomethylation	N14:Deamidation (NQ):26.31;C17:Carbamidomethylation:1000.00	FALSE
DLYSGLIGPLIVC(+57.02)R	62.78	1574.85	14	4	788.435	2	27.5376	104000	669000	6359	20210616_HS_C_50ng_F4-2.raw	1	E9PFZ2|E9PFZ2_HUMAN;H7C5R1|H7C5R1_HUMAN;P00450|CERU_HUMAN	Carbamidomethylation	C13:Carbamidomethylation:1000.00	FALSE
DM(+15.99)YSFLEDM(+15.99)GLK	53.28	1479.63	12	-2.4	740.819	2	21.2757	11700000	92800000	4680	20210616_HS_C_50ng_F3-1.raw	13	P01023|A2MG_HUMAN	Oxidation (M); Oxidation (M)		FALSE
DNELLVYK	48.7	992.518	8	-1	497.266	2	15.7483	1960000	5730000	2985	20210616_HS_C_50ng_F3-1.raw	6	P02743|SAMP_HUMAN			FALSE
DNVFDGLVR	48.65	1033.52	9	3.2	517.769	2	19.8901	3160000	12400000	4704	20210616_HS_C_50ng_F2-1.raw	7	P04114|APOB_HUMAN			FALSE
DPN(+0.98)GLPPEAQK	37.34	1165.56	11	3.2	583.79	2	6.2209	398000	872000	1205	20210616_HS_C_50ng_F3-3.raw	2	Q5VY30|Q5VY30_HUMAN;P02753|RET4_HUMAN	Deamidation (NQ)	N3:Deamidation (NQ):31.67	FALSE
DPTFIPAPIQAK	68	1296.71	12	0.5	649.361	2	20.6053	4150000	29800000	4407	20210616_HS_C_50ng_F3-1.raw	5	P01019|ANGT_HUMAN			FALSE
DQYELLC(+57.02)LDNTR	66.28	1538.7	12	-1.6	770.358	2	20.7797	10600000	101000000	4257	20210616_HS_C_50ng_F4-1.raw	14	C9JVG0|C9JVG0_HUMAN;P02787|TRFE_HUMAN	Carbamidomethylation	C7:Carbamidomethylation:1000.00	FALSE
DSAHGFLK	36.57	873.434	8	-4.4	437.723	2	5.9892			1002	20210616_HS_C_50ng_F1-3.raw	1	P02787|TRFE_HUMAN			FALSE
DSC(+57.02)VGSLVVK	55.93	1062.54	10	1.9	532.277	2	13.9197	6880000	20100000	2942	20210616_HS_C_50ng_F2-2.raw	12	P01024|CO3_HUMAN	Carbamidomethylation	C3:Carbamidomethylation:1000.00	FALSE
DSGFQM(+15.99)NQLR	52.93	1210.54	10	0.3	606.278	2	6.1944	40500000	292000000	1575	20210616_HS_C_50ng_F3-1.raw	39	P02787|TRFE_HUMAN	Oxidation (M)		FALSE
DSGFQMNQLR	50	1194.55	10	0.3	598.28	2	16.2693	72100	548000	3192	20210616_HS_C_50ng_F3-3.raw	1	P02787|TRFE_HUMAN			FALSE
DSPVLIDFFEDTER	56.66	1681.78	14	4.7	841.903	2	27.3913	590000	3020000	6292	20210616_HS_C_50ng_F4-3.raw	2	P04196|HRG_HUMAN			FALSE
DSTYSLSSTLTLSK	66.72	1501.75	14	-2.6	751.881	2	20.1731	37500000	272000000	4065	20210616_HS_C_50ng_F4-1.raw	30	A0A5H1ZRQ3|A0A5H1ZRQ3_HUMAN;P01834|IGKC_HUMAN			FALSE
DTDTGALLFIGK	49.91	1249.66	12	3.8	625.837	2	22.1577	581000	4290000	4915	20210616_HS_C_50ng_F3-1.raw	3	P36955|PEDF_HUMAN			FALSE
DTEE(+21.98)EDFHVDQVTTVK	39.3	1912.83	16	0.9	638.618	3	17.6683	198000	2190000	3987	20210616_HS_C_50ng_F2-2.raw	1		Sodium adduct	E4:Sodium adduct:0.00	FALSE
DTEEEDFHVDQATTVK	65.81	1862.82	16	-0.4	932.415	2	15.6444	34800000	172000000	2983	20210616_HS_C_50ng_F3-1.raw	25				FALSE
DTEEEDFHVDQVTTVK	82.59	1890.85	16	2.3	946.434	2	17.6683	88400000	871000000	3977	20210616_HS_C_50ng_F2-2.raw	36				FALSE
DTSC(+57.02)VNPPTVQNAYIVSR	58.06	2019.97	18	4.5	1011	2	19.079	738000	5280000	3888	20210616_HS_C_50ng_F4-3.raw	3	P08603|CFAH_HUMAN	Carbamidomethylation	C4:Carbamidomethylation:1000.00	FALSE
DTVIKPLLVE(+21.98)PEGLEK	37.72	1800.98	16	5.5	601.339	3	23.0909	51800	691000	5617	20210616_HS_C_50ng_F2-1.raw	1	P01023|A2MG_HUMAN	Sodium adduct	E10:Sodium adduct:10.19	FALSE
DTVIKPLLVEPEGLE(+21.98)K	38.67	1800.98	16	5.5	601.339	3	23.1415	149000	1680000	5559	20210616_HS_C_50ng_F2-2.raw	2	P01023|A2MG_HUMAN	Sodium adduct	E15:Sodium adduct:0.00	FALSE
DTVIKPLLVEPEGLEK	79.11	1779	16	4.7	890.513	2	23.1415	10100000	67100000	5551	20210616_HS_C_50ng_F2-2.raw	9	P01023|A2MG_HUMAN			FALSE
DTWVEHWPEEDEC(+57.02)QDEENQK	68.95	2602.02	20	2.1	868.349	3	19.6941	1880000	15800000	4117	20210616_HS_C_50ng_F3-1.raw	3	P01024|CO3_HUMAN	Carbamidomethylation	C13:Carbamidomethylation:1000.00	FALSE
DVFLGM(+15.99)FLYEYAR	55.99	1638.78	13	3.6	820.398	2	28.3074	223000	1080000	6364	20210616_HS_C_50ng_F3-1.raw	2	A0A0C4DGB6|A0A0C4DGB6_HUMAN;P02768|ALBU_HUMAN;C9JKR2|C9JKR2_HUMAN;D6RHD5|D6RHD5_HUMAN;B7WNR0|B7WNR0_HUMAN;H0YA55|H0YA55_HUMAN	Oxidation (M)		FALSE
DVWGIEGPIDAAFTR	60.86	1645.81	15	4	823.916	2	26.4732	1280000	6030000	6110	20210616_HS_C_50ng_F4-2.raw	3	P04004|VTNC_HUMAN			FALSE
DWHGVPGQVDAAM(+15.99)AGR	59.96	1681.76	16	4.2	561.597	3	16.8423	2960000	15800000	3714	20210616_HS_C_50ng_F2-2.raw	4	P04004|VTNC_HUMAN	Oxidation (M)		FALSE
DYAGVFSDAGLTFTSSSGQQTAQR	59.86	2493.14	24	3.1	832.057	3	23.3921	600000	6520000	5099	20210616_HS_C_50ng_F4-1.raw	3	P01024|CO3_HUMAN			FALSE
DYELLC(+57.02)LDGTR	55.47	1353.62	11	1.6	677.82	2	20.8968	2740000	10500000	4391	20210616_HS_C_50ng_F4-2.raw	5	P02787|TRFE_HUMAN	Carbamidomethylation	C6:Carbamidomethylation:1000.00	FALSE
DYFM(+15.99)PC(+57.02)PGR	50.73	1157.46	9	2.6	579.74	2	12.534	16100000	62500000	2417	20210616_HS_C_50ng_F3-3.raw	31	P02790|HEMO_HUMAN;Q9BS19|Q9BS19_HUMAN	Oxidation (M); Carbamidomethylation	C6:Carbamidomethylation:1000.00	FALSE
DYVSQFEGSALGK	64.51	1399.66	13	2.8	700.84	2	20.3778	8350000	66700000	4231	20210616_HS_C_50ng_F4-2.raw	30	P02647|APOA1_HUMAN			FALSE
E(+21.98)PQVYTLPPSR	43.02	1307.65	11	-0.6	436.89	3	16.467	2970000	6820000	3271	20210616_HS_C_50ng_F3-1.raw	5	P01859|IGHG2_HUMAN;P01857|IGHG1_HUMAN;A0A286YEY4|A0A286YEY4_HUMAN;A0A0A0MS08|A0A0A0MS08_HUMAN;A0A0A0MS07|A0A0A0MS07_HUMAN	Sodium adduct	E1:Sodium adduct:59.20	FALSE
E(+21.98)TYGEM(+15.99)ADC(+57.02)C(+57.02)AK	38.48	1471.5	12	1.7	736.76	2	4.8172	4410000	4680000	488	20210616_HS_C_50ng_F3-3.raw	3	A0A0C4DGB6|A0A0C4DGB6_HUMAN;A0A087WWT3|A0A087WWT3_HUMAN;P02768|ALBU_HUMAN;H7C013|H7C013_HUMAN	Sodium adduct; Oxidation (M); Carbamidomethylation; Carbamidomethylation	E1:Sodium adduct:0.00;M6:Oxidation (M):1000.00;C9:Carbamidomethylation:1000.00;C10:Carbamidomethylation:1000.00	FALSE
E(-18.01)D(+21.98)PQ(+0.98)TFYYAVAVVK	41.38	1633.76	14	1.1	817.89	2	23.2722	136000	1610000	5321	20210616_HS_C_50ng_F3-2.raw	3	P02787|TRFE_HUMAN	Pyro-glu from E; Sodium adduct; Deamidation (NQ)	E1:Pyro-glu from E:1000.00;D2:Sodium adduct:81.55;Q4:Deamidation (NQ):1000.00	FALSE
E(-18.01)DPQTFYYAVAVVK	65.65	1610.8	14	5.6	806.411	2	25.0846	557000	4080000	5726	20210616_HS_C_50ng_F4-2.raw	3	P02787|TRFE_HUMAN	Pyro-glu from E		FALSE
E(-18.01)ELLPAQDIK	41.31	1136.61	10	6.6	569.315	2	19.3544	207000	1640000	3973	20210616_HS_C_50ng_F4-3.raw	3	H7C5H1|H7C5H1_HUMAN;E7ETN3|E7ETN3_HUMAN;P00751|CFAB_HUMAN;B4E1Z4|B4E1Z4_HUMAN	Pyro-glu from E		FALSE
E(-18.01)FQLFSSPHGK	54.23	1257.61	11	2.7	629.816	2	21.7851	5750000	40500000	4783	20210616_HS_C_50ng_F3-1.raw	11	P02787|TRFE_HUMAN	Pyro-glu from E		FALSE
E(-18.01)FQVPTFTIPK	46.21	1287.69	11	1.9	644.852	2	26.4732	138000	1120000	6120	20210616_HS_C_50ng_F4-2.raw	2	P04114|APOB_HUMAN	Pyro-glu from E		FALSE
E(-18.01)FTPPVQAAYQK	39.8	1359.68	12	-0.4	680.848	2	19.5503	42800	579000	3981	20210616_HS_C_50ng_F4-2.raw	1	P68871|HBB_HUMAN	Pyro-glu from E		FALSE
E(-18.01)GTC(+57.02)PEAPTDEC(+57.02)KPVK	53.27	1798.79	16	-1.2	900.399	2	7.4857	480000	3580000	1317	20210616_HS_C_50ng_F4-3.raw	3	P02787|TRFE_HUMAN	Pyro-glu from E; Carbamidomethylation; Carbamidomethylation	C4:Carbamidomethylation:1000.00;C12:Carbamidomethylation:1000.00	FALSE
E(-18.01)GYYGYTGAFR	55.23	1264.55	11	1.6	633.284	2	19.8409	2360000	8420000	4049	20210616_HS_C_50ng_F4-2.raw	4	H7C5E8|H7C5E8_HUMAN;P02787|TRFE_HUMAN	Pyro-glu from E		FALSE
E(-18.01)HAVEGDC(+57.02)DFQLLK	61.04	1641.75	14	5.4	821.885	2	20.4198	858000	12300000	4422	20210616_HS_C_50ng_F3-3.raw	4	P02765|FETUA_HUMAN;C9JV77|C9JV77_HUMAN	Pyro-glu from E; Carbamidomethylation	C8:Carbamidomethylation:1000.00	FALSE
E(-18.01)IGELYLPK	43.53	1042.57	9	2.4	522.293	2	22.8246	266000	2610000	5081	20210616_HS_C_50ng_F4-3.raw	3	G3V3A0|G3V3A0_HUMAN;P01011|AACT_HUMAN	Pyro-glu from E		FALSE
E(-18.01)IM(+15.99)ENYNIALR	47.36	1362.66	11	-2.6	682.336	2	20.3937	140000	1570000	4138	20210616_HS_C_50ng_F4-1.raw	3	P08603|CFAH_HUMAN	Pyro-glu from E; Oxidation (M)		FALSE
E(-18.01)LSSFIDK	38.39	919.465	8	0.9	920.473	1	20.0193	61400	996000	4121	20210616_HS_C_50ng_F4-2.raw	2	P02774|VTDB_HUMAN;D6RF35|D6RF35_HUMAN	Pyro-glu from E		FALSE
E(-18.01)PQVYTLPPSR	62.4	1267.66	11	6.4	634.839	2	18.199	12100000	37700000	3528	20210616_HS_C_50ng_F4-1.raw	12	P01859|IGHG2_HUMAN;P01857|IGHG1_HUMAN;A0A286YEY4|A0A286YEY4_HUMAN;A0A0A0MS08|A0A0A0MS08_HUMAN;A0A0A0MS07|A0A0A0MS07_HUMAN	Pyro-glu from E		FALSE
E(-18.01)PQVYTLPPSRDELTK	41.54	1853.95	16	0.9	927.984	2	20.2785			4109	20210616_HS_C_50ng_F4-1.raw	3	P01857|IGHG1_HUMAN;A0A0A0MS08|A0A0A0MS08_HUMAN;A0A0A0MS07|A0A0A0MS07_HUMAN	Pyro-glu from E		FALSE
E(-18.01)QLSLLDR	44.26	954.513	8	-1	478.264	2	19.4868	410000	3140000	3943	20210616_HS_C_50ng_F4-2.raw	3	G3V595|G3V595_HUMAN;P01011|AACT_HUMAN	Pyro-glu from E		FALSE
E(-18.01)TAASLLQAGYK	64.26	1232.64	12	0.7	617.328	2	19.9502	371000	3760000	4084	20210616_HS_C_50ng_F4-2.raw	3	P00734|THRB_HUMAN	Pyro-glu from E		FALSE
E(-18.01)TLFSVM(+15.99)PGLK	41.1	1218.63	11	4.6	610.326	2	22.8963	49800	516000	5110	20210616_HS_C_50ng_F4-3.raw	2	Q14624|ITIH4_HUMAN;B7ZKJ8|B7ZKJ8_HUMAN;H7C0L5|H7C0L5_HUMAN	Pyro-glu from E; Oxidation (M)		FALSE
E(-18.01)TYGE(+21.98)M(+15.99)ADC(+57.02)C(+57.02)AK	39.92	1453.49	12	0.6	727.754	2	6.4233	469000	927000	957	20210616_HS_C_50ng_F4-3.raw	1	A0A0C4DGB6|A0A0C4DGB6_HUMAN;A0A087WWT3|A0A087WWT3_HUMAN;P02768|ALBU_HUMAN;H7C013|H7C013_HUMAN	Pyro-glu from E; Sodium adduct; Oxidation (M); Carbamidomethylation; Carbamidomethylation	E1:Pyro-glu from E:1000.00;E5:Sodium adduct:12.33;M6:Oxidation (M):1000.00;C9:Carbamidomethylation:1000.00;C10:Carbamidomethylation:1000.00	FALSE
E(-18.01)VAFDLEIPK	49.38	1141.6	10	5.4	571.811	2	24.7054	60700	769000	5503	20210616_HS_C_50ng_F4-1.raw	2	P19827|ITIH1_HUMAN;F8WAS2|F8WAS2_HUMAN	Pyro-glu from E		FALSE
E(-18.01)VGPTNADPVC(+57.02)LAK	63.07	1451.71	14	1.5	726.862	2	18.6547	301000	3460000	3636	20210616_HS_C_50ng_F4-1.raw	3	E9PFZ2|E9PFZ2_HUMAN;H7C5R1|H7C5R1_HUMAN;P00450|CERU_HUMAN	Pyro-glu from E; Carbamidomethylation	C11:Carbamidomethylation:1000.00	FALSE
E(-18.01)VQLVESGGGLVQPGGSLR	83.41	1862.98	19	5.8	932.505	2	23.2617	3380000	28000000	5184	20210616_HS_C_50ng_F4-2.raw	7		Pyro-glu from E		FALSE
E(-18.01)YTDASFTNR	49.59	1184.51	10	0.7	593.263	2	14.0917	121000	379000	2676	20210616_HS_C_50ng_F4-3.raw	1	E9PFZ2|E9PFZ2_HUMAN;H7C5R1|H7C5R1_HUMAN;P00450|CERU_HUMAN	Pyro-glu from E		FALSE
EAGIPEFYDYDVALIK	55.01	1841.91	16	5	921.966	2	26.6644	756000	5120000	6165	20210616_HS_C_50ng_F4-2.raw	4	H7C5H1|H7C5H1_HUMAN;E7ETN3|E7ETN3_HUMAN;P00751|CFAB_HUMAN;A0A0G2JH38|A0A0G2JH38_HUMAN;B4E1Z4|B4E1Z4_HUMAN			FALSE
EAQLPVIENK	46.56	1139.62	10	2.5	570.818	2	15.5914	6620000	21100000	3115	20210616_HS_C_50ng_F3-1.raw	9	P00747|PLMN_HUMAN			FALSE
EDIFM(+15.99)ETLK	47.18	1140.54	9	3.4	571.278	2	18.9974	2290000	19400000	3903	20210616_HS_C_50ng_F3-1.raw	8	C9JEV0|C9JEV0_HUMAN;P25311|ZA2G_HUMAN	Oxidation (M)		FALSE
EDIPPADLSD(+21.98)QVPDTESETR	68.81	2234.98	20	0.7	746.001	3	18.6812	2550000	10700000	3751	20210616_HS_C_50ng_F4-3.raw	8	P01024|CO3_HUMAN	Sodium adduct	D10:Sodium adduct:19.05	FALSE
EDIPPADLSDQVPDTESETR	70.23	2213	20	-1.4	738.672	3	18.6609	39700000	146000000	3820	20210616_HS_C_50ng_F4-2.raw	23	P01024|CO3_HUMAN			FALSE
EDPQTFYYAVAVVK	65.12	1628.81	14	4.1	815.415	2	23.1095	13200000	115000000	5000	20210616_HS_C_50ng_F4-1.raw	17	P02787|TRFE_HUMAN			FALSE
EDVYVVGTVLR	65.36	1248.67	11	1.9	625.344	2	20.5782	4110000	32300000	4392	20210616_HS_C_50ng_F3-1.raw	6	P04003|C4BPA_HUMAN			FALSE
EELLPAQDIK	56.47	1154.62	10	5.3	578.319	2	17.2316	8320000	36500000	3385	20210616_HS_C_50ng_F3-1.raw	5	H7C5H1|H7C5H1_HUMAN;E7ETN3|E7ETN3_HUMAN;P00751|CFAB_HUMAN;B4E1Z4|B4E1Z4_HUMAN			FALSE
EENFYVDETTVVK	57.03	1571.74	13	4.2	786.878	2	18.8865	682000	7790000	3864	20210616_HS_C_50ng_F3-1.raw	3	P08185|CBG_HUMAN			FALSE
EESSSGSSHAVM(+15.99)DISLPTGISANEEDLK	68.53	2905.31	28	1.7	969.447	3	21.6492	905000	10100000	4754	20210616_HS_C_50ng_F3-1.raw	3	P01031|CO5_HUMAN	Oxidation (M)		FALSE
EFNAETFTFHADIC(+57.02)TLSEK	32.97	2259.02	19	2.7	754.014	3	24.5705	145000	1520000	4909	20210616_HS_C_50ng_F1-1.raw	2	A0A0C4DGB6|A0A0C4DGB6_HUMAN;A0A087WWT3|A0A087WWT3_HUMAN;P02768|ALBU_HUMAN;C9JKR2|C9JKR2_HUMAN;D6RHD5|D6RHD5_HUMAN;B7WNR0|B7WNR0_HUMAN;H0YA55|H0YA55_HUMAN	Carbamidomethylation	C14:Carbamidomethylation:1000.00	FALSE
EFQLFSSPHGK	60.55	1275.62	11	2.2	638.821	2	18.9759	8580000	67400000	3657	20210616_HS_C_50ng_F1-3.raw	18	P02787|TRFE_HUMAN			FALSE
EFQVPTFTIPK	39.73	1305.7	11	2.5	653.859	2	24.6932	2350000	12500000	5862	20210616_HS_C_50ng_F2-3.raw	5	P04114|APOB_HUMAN			FALSE
EFTPPVQAAYQK	57.03	1377.69	12	2	689.855	2	17.2768	1740000	9670000	3453	20210616_HS_C_50ng_F3-3.raw	3	P68871|HBB_HUMAN			FALSE
EGTC(+57.02)PEAPTDEC(+57.02)KPVK	48.64	1816.8	16	3.4	606.61	3	6.2936	5110000	17500000	1336	20210616_HS_C_50ng_F2-3.raw	6	P02787|TRFE_HUMAN	Carbamidomethylation; Carbamidomethylation	C4:Carbamidomethylation:1000.00;C12:Carbamidomethylation:1000.00	FALSE
EGVQKEDIPPADLSDQVPDTESETR	54.12	2754.28	25	2.6	919.104	3	18.7022	6990000	13300000	4026	20210616_HS_C_50ng_F3-3.raw	4	P01024|CO3_HUMAN			FALSE
EGYYGYTGAFR	59.28	1282.56	11	-4.9	642.285	2	18.2436	87500000	357000000	3675	20210616_HS_C_50ng_F3-1.raw	58	H7C5E8|H7C5E8_HUMAN;P02787|TRFE_HUMAN			FALSE
EHAVEGDC(+57.02)DFQLLK	72.32	1659.76	14	5	830.889	2	19.2895	664000	7770000	4470	20210616_HS_C_50ng_F2-2.raw	3	P02765|FETUA_HUMAN;C9JV77|C9JV77_HUMAN	Carbamidomethylation	C8:Carbamidomethylation:1000.00	FALSE
EHLVQATPENLQEAR	59.29	1733.87	15	6.6	578.968	3	15.225	95500	873000	3316	20210616_HS_C_50ng_F2-1.raw	1	E7ET33|E7ET33_HUMAN;A0A087WW43|A0A087WW43_HUMAN;Q06033|ITIH3_HUMAN			FALSE
EIETYHNLLEGGQEDFESSGAGK	65.74	2509.12	23	3.6	837.385	3	20.9134	1160000	8440000	5001	20210616_HS_C_50ng_F2-1.raw	3	K7EQQ3|K7EQQ3_HUMAN;P35527|K1C9_HUMAN			FALSE
EIGELYLPK	51.07	1060.58	9	3.9	531.3	2	19.6015	12300000	122000000	4716	20210616_HS_C_50ng_F2-1.raw	9	G3V3A0|G3V3A0_HUMAN;P01011|AACT_HUMAN			FALSE
EILSVDC(+57.02)STNNPSQAK	49.73	1761.82	16	2.1	881.919	2	14.0795	2250000	6330000	2647	20210616_HS_C_50ng_F3-2.raw	5	P10909|CLUS_HUMAN;H0YC35|H0YC35_HUMAN	Carbamidomethylation	C7:Carbamidomethylation:1000.00	FALSE
EIM(+15.99)ENYNIALR	54.75	1380.67	11	-4.8	691.339	2	18.4055	1670000	15800000	3721	20210616_HS_C_50ng_F3-1.raw	9	P08603|CFAH_HUMAN	Oxidation (M)		FALSE
EIPAWVPFDPAAQITK	45.39	1781.94	16	5.6	891.98	2	27.2319	144000	1050000	6288	20210616_HS_C_50ng_F4-2.raw	1	C9JEV0|C9JEV0_HUMAN;P25311|ZA2G_HUMAN			FALSE
EKLQDEDLGFL	33.84	1305.65	11	3.4	653.832	2	22.1577	866000	5880000	4909	20210616_HS_C_50ng_F3-1.raw	2	H7C5H1|H7C5H1_HUMAN;E7ETN3|E7ETN3_HUMAN;P00751|CFAB_HUMAN;B4E1Z4|B4E1Z4_HUMAN			FALSE
ELDESLQVAER	47.93	1287.63	11	-4.9	644.819	2	15.09	6450000	35800000	3002	20210616_HS_C_50ng_F3-2.raw	8	H0YAS8|H0YAS8_HUMAN;P10909|CLUS_HUMAN;H0YC35|H0YC35_HUMAN			FALSE
ELLDTVTAPQK	41.83	1213.66	11	0.4	607.835	2	15.915	1010000	3880000	3059	20210616_HS_C_50ng_F3-1.raw	3	I3L4Z0|I3L4Z0_HUMAN;P36955|PEDF_HUMAN			FALSE
ELLESYIDGR	40.31	1193.59	10	3.4	597.806	2	18.5541	122000	1650000	3779	20210616_HS_C_50ng_F3-1.raw	3	P00734|THRB_HUMAN;E9PIT3|E9PIT3_HUMAN			FALSE
ELSYYSLEDLNNK	51.36	1586.75	13	1.9	794.382	2	20.9495	26400	680000	4515	20210616_HS_C_50ng_F3-1.raw	3	P01031|CO5_HUMAN			FALSE
ELTTEIDNNIEQISSYK	59.4	1995.96	17	3.6	998.993	2	22.2317	600000	6020000	4719	20210616_HS_C_50ng_F4-1.raw	3	#CONTAM#cont|000133|;#CONTAM#cont|000131|;P13645|K1C10_HUMAN;#CONTAM#cont|000129|;#CONTAM#cont|000136|;#CONTAM#cont|000122|;#CONTAM#cont|000130|			FALSE
EM(+15.99)SGSPASGIPVK	48.01	1274.62	13	-0.9	638.316	2	7.1876	6370000	21900000	1461	20210616_HS_C_50ng_F3-1.raw	8	A0A140TA32|A0A140TA32_HUMAN;A0A140TA29|A0A140TA29_HUMAN;P0C0L4|CO4A_HUMAN;P0C0L5|CO4B_HUMAN;A0A0G2JPR0|A0A0G2JPR0_HUMAN;A0A140TA49|A0A140TA49_HUMAN;F5GXS0|F5GXS0_HUMAN;A0A140TA44|A0A140TA44_HUMAN;A0A0G2JL54|A0A0G2JL54_HUMAN	Oxidation (M)		FALSE
EN(+0.98)EGFTVTAEGK	41.06	1281.57	12	3.9	641.796	2	8.4846	1290000	1800000	1581	20210616_HS_C_50ng_F3-3.raw	3	P01024|CO3_HUMAN;M0QYC8|M0QYC8_HUMAN	Deamidation (NQ)		FALSE
ENEGFTVTAEGK	52.81	1280.59	12	2	641.303	2	8.143	444000	1380000	1581	20210616_HS_C_50ng_F3-3.raw	2	P01024|CO3_HUMAN;M0QYC8|M0QYC8_HUMAN			FALSE
ENFAGEATLQR	62.16	1234.59	11	6.1	618.308	2	13.4696	3180000	9730000	2847	20210616_HS_C_50ng_F2-2.raw	9	P04114|APOB_HUMAN			FALSE
ENFLFLTPDC(+57.02)K	52.23	1382.65	11	0.5	692.335	2	23.336	740000	5980000	5350	20210616_HS_C_50ng_F3-2.raw	2	P01042|KNG1_HUMAN	Carbamidomethylation	C10:Carbamidomethylation:1000.00	FALSE
EPQ(+0.98)VYTLPPSR	45.32	1286.65	11	8	644.338	2	21.8035	111000	2230000	4806	20210616_HS_C_50ng_F3-1.raw	2	P01859|IGHG2_HUMAN;P01857|IGHG1_HUMAN;A0A286YEY4|A0A286YEY4_HUMAN;A0A0A0MS08|A0A0A0MS08_HUMAN;A0A0A0MS07|A0A0A0MS07_HUMAN	Deamidation (NQ)		FALSE
EPQVYTLPPSR	62.01	1285.67	11	-7.4	643.836	2	16.467	205000000	670000000	3235	20210616_HS_C_50ng_F3-1.raw	71	P01859|IGHG2_HUMAN;P01857|IGHG1_HUMAN;A0A286YEY4|A0A286YEY4_HUMAN;A0A0A0MS08|A0A0A0MS08_HUMAN;A0A0A0MS07|A0A0A0MS07_HUMAN			FALSE
EPQVYTLPPSRDELTK	49.83	1871.96	16	3.3	624.997	3	18.7188	17100000	52900000	4226	20210616_HS_C_50ng_F2-2.raw	6	P01857|IGHG1_HUMAN;A0A0A0MS08|A0A0A0MS08_HUMAN;A0A0A0MS07|A0A0A0MS07_HUMAN			FALSE
EPQVYTLPPSREEM(+15.99)TK	53	1919.93	16	0.5	640.984	3	16.1438	37100000	67200000	3617	20210616_HS_C_50ng_F2-2.raw	5	P01859|IGHG2_HUMAN;A0A286YEY4|A0A286YEY4_HUMAN	Oxidation (M)		FALSE
EQLGEFYEALDC(+57.02)LR	53.61	1741.8	14	3.6	871.909	2	25.7897	505000	5010000	5878	20210616_HS_C_50ng_F3-1.raw	4	P02763|A1AG1_HUMAN	Carbamidomethylation	C12:Carbamidomethylation:1000.00	FALSE
EQLGPVTQEFWDNLEK	43.25	1931.93	16	3.2	966.974	2	25.7849	1150000	7220000	5903	20210616_HS_C_50ng_F4-2.raw	3	F8W696|F8W696_HUMAN;P02647|APOA1_HUMAN			FALSE
EQLQDM(+15.99)GLVDLFSPEK	55.68	1863.89	16	2.2	932.956	2	24.8598	5690000	36200000	5516	20210616_HS_C_50ng_F4-1.raw	11	P01008|ANT3_HUMAN	Oxidation (M)		FALSE
EQLSLLDR	39.22	972.524	8	-0.8	487.27	2	14.9559	25000000	76100000	3710	20210616_HS_C_50ng_F2-3.raw	9	G3V595|G3V595_HUMAN;P01011|AACT_HUMAN			FALSE
EQVQSC(+57.02)GPPPELLN(+0.98)GNVK	58.72	1965.95	18	1.2	983.982	2	18.3562	502000	3000000	3597	20210616_HS_C_50ng_F4-2.raw	3	P08603|CFAH_HUMAN	Carbamidomethylation; Deamidation (NQ)	C6:Carbamidomethylation:1000.00;N14:Deamidation (NQ):14.04	FALSE
ESQLPTVM(+15.99)DFR	36.52	1337.63	11	-0.5	669.821	2	18.872	4830000	20600000	3937	20210616_HS_C_50ng_F3-1.raw	5	A8MUN2|A8MUN2_HUMAN;P04114|APOB_HUMAN	Oxidation (M)		FALSE
ESYSGVTLDPR	37.97	1222.58	11	2.5	612.3	2	15.2682	1750000	2960000	2925	20210616_HS_C_50ng_F3-3.raw	2	P01031|CO5_HUMAN			FALSE
ETAASLLQAGYK	59.76	1250.65	12	-1.1	626.332	2	18.1286			4132	20210616_HS_C_50ng_F2-2.raw	4	P00734|THRB_HUMAN			FALSE
ETC(+57.02)FAEEGK	40.85	1069.44	9	8.7	535.732	2	9.176	2220000	1680000	2008	20210616_HS_C_50ng_F2-3.raw	5	A0A087WWT3|A0A087WWT3_HUMAN;P02768|ALBU_HUMAN;C9JKR2|C9JKR2_HUMAN;D6RHD5|D6RHD5_HUMAN;B7WNR0|B7WNR0_HUMAN;H0YA55|H0YA55_HUMAN	Carbamidomethylation	C3:Carbamidomethylation:1000.00	FALSE
ETLFSVM(+15.99)PGLK	51.97	1236.64	11	2.5	619.33	2	20.8701	4840000	38400000	4486	20210616_HS_C_50ng_F3-1.raw	7	Q14624|ITIH4_HUMAN;B7ZKJ8|B7ZKJ8_HUMAN;H7C0L5|H7C0L5_HUMAN	Oxidation (M)		FALSE
ETLLQDFR	45.25	1020.52	8	1.6	511.27	2	19.1559	1250000	8980000	4457	20210616_HS_C_50ng_F2-1.raw	5	P02760|AMBP_HUMAN;S4R471|S4R471_HUMAN;S4R3Y4|S4R3Y4_HUMAN			FALSE
ETYGE(+21.98)M(+15.99)ADC(+57.02)C(+57.02)AK	65.12	1471.5	12	-3.5	736.756	2	4.286	9010000	20600000	738	20210616_HS_C_50ng_F3-1.raw	18	A0A0C4DGB6|A0A0C4DGB6_HUMAN;A0A087WWT3|A0A087WWT3_HUMAN;P02768|ALBU_HUMAN;H7C013|H7C013_HUMAN	Sodium adduct; Oxidation (M); Carbamidomethylation; Carbamidomethylation	E5:Sodium adduct:0.00;M6:Oxidation (M):1000.00;C9:Carbamidomethylation:1000.00;C10:Carbamidomethylation:1000.00	FALSE
ETYGEM(+15.99)AD(+21.98)C(+57.02)C(+57.02)AK	60.69	1471.5	12	-3.5	736.756	2	4.286	5540000	7400000	884	20210616_HS_C_50ng_F3-1.raw	5	A0A0C4DGB6|A0A0C4DGB6_HUMAN;A0A087WWT3|A0A087WWT3_HUMAN;P02768|ALBU_HUMAN;H7C013|H7C013_HUMAN	Oxidation (M); Sodium adduct; Carbamidomethylation; Carbamidomethylation	M6:Oxidation (M):1000.00;D8:Sodium adduct:0.00;C9:Carbamidomethylation:1000.00;C10:Carbamidomethylation:1000.00	FALSE
ETYGEM(+15.99)ADC(+57.02)C(+57.02)AK	74.01	1449.52	12	-9.1	725.761	2	8.4841	69200000	193000000	1711	20210616_HS_C_50ng_F3-1.raw	94	A0A0C4DGB6|A0A0C4DGB6_HUMAN;A0A087WWT3|A0A087WWT3_HUMAN;P02768|ALBU_HUMAN;H7C013|H7C013_HUMAN	Oxidation (M); Carbamidomethylation; Carbamidomethylation	C9:Carbamidomethylation:1000.00;C10:Carbamidomethylation:1000.00	FALSE
ETYGEMADC(+57.02)C(+57.02)AK	50.75	1433.53	12	1.4	717.771	2	6.6156			1198	20210616_HS_C_50ng_F3-3.raw	4	A0A0C4DGB6|A0A0C4DGB6_HUMAN;A0A087WWT3|A0A087WWT3_HUMAN;P02768|ALBU_HUMAN;H7C013|H7C013_HUMAN	Carbamidomethylation; Carbamidomethylation	C9:Carbamidomethylation:1000.00;C10:Carbamidomethylation:1000.00	FALSE
EVAFDLEIPK	48.49	1159.61	10	3.7	580.816	2	22.9018	4000000	15900000	5151	20210616_HS_C_50ng_F3-1.raw	4	P19827|ITIH1_HUMAN;F8WAS2|F8WAS2_HUMAN			FALSE
EVGPTNADPVC(+57.02)LAK	58.13	1469.72	14	1.2	735.867	2	16.8072	3180000	26200000	3294	20210616_HS_C_50ng_F3-1.raw	8	E9PFZ2|E9PFZ2_HUMAN;H7C5R1|H7C5R1_HUMAN;P00450|CERU_HUMAN	Carbamidomethylation	C11:Carbamidomethylation:1000.00	FALSE
EVGTPHGIILDSVDAAFIC(+57.02)PGSSR	49.69	2497.23	24	2	833.418	3	25.8366	499000	3600000	5891	20210616_HS_C_50ng_F3-1.raw	2	P02790|HEMO_HUMAN	Carbamidomethylation	C19:Carbamidomethylation:1000.00	FALSE
EVGTVLSQVYSK	50.7	1308.69	12	0.9	655.354	2	18.3389	1460000	9850000	3708	20210616_HS_C_50ng_F3-1.raw	3	P04114|APOB_HUMAN			FALSE
EVPLNTIIFM(+15.99)GR	39.05	1404.74	12	-2	703.378	2	23.4844	1540000	11300000	5347	20210616_HS_C_50ng_F3-3.raw	3	P01008|ANT3_HUMAN;Q8TCE1|Q8TCE1_HUMAN	Oxidation (M)		FALSE
EVQLVE(+21.98)SGGGLVQPGGSLR	63.69	1902.98	19	2.7	635.335	3	20.8996	927000	9460000	4297	20210616_HS_C_50ng_F4-1.raw	3		Sodium adduct	E6:Sodium adduct:67.85	FALSE
EVQLVESGGGLVQ(+0.98)PGGSLR	44.23	1881.98	19	8.1	628.339	3	21.2209			4508	20210616_HS_C_50ng_F4-2.raw	1		Deamidation (NQ)	Q13:Deamidation (NQ):14.57	FALSE
EVQLVESGGGLVQPGGSLR	68.08	1881	19	2.6	941.507	2	20.9704	29000000	165000000	4552	20210616_HS_C_50ng_F4-2.raw	19				FALSE
EVQPVELPNC(+57.02)NLVK	44.25	1637.84	14	2.3	819.932	2	20.4329	1080000	10700000	4429	20210616_HS_C_50ng_F3-2.raw	3	P27169|PON1_HUMAN	Carbamidomethylation	C10:Carbamidomethylation:1000.00	FALSE
EVSFDVELPK	48.24	1161.59	10	3.3	581.805	2	21.5529			4727	20210616_HS_C_50ng_F3-1.raw	1	E7ET33|E7ET33_HUMAN;A0A087WW43|A0A087WW43_HUMAN;Q06033|ITIH3_HUMAN			FALSE
EVVADSVWVDVK	52.15	1344.69	12	-4.2	673.351	2	21.1054	3170000	19000000	4685	20210616_HS_C_50ng_F3-1.raw	9	P01024|CO3_HUMAN			FALSE
EVVSLTEAC(+57.02)C(+57.02)AEGADPDC(+57.02)YDTR	69.16	2517.01	22	1.9	840.012	3	18.9677	1560000	14300000	3784	20210616_HS_C_50ng_F4-2.raw	6	D6RBJ7|D6RBJ7_HUMAN;P02774|VTDB_HUMAN;D6RF20|D6RF20_HUMAN;D6RF35|D6RF35_HUMAN	Carbamidomethylation; Carbamidomethylation; Carbamidomethylation	C9:Carbamidomethylation:1000.00;C10:Carbamidomethylation:1000.00;C18:Carbamidomethylation:1000.00	FALSE
EVYGFNPEGK	49.04	1138.53	10	3.8	570.274	2	14.0126	2070000	7240000	2990	20210616_HS_C_50ng_F2-1.raw	5	A8MUN2|A8MUN2_HUMAN;A0A669KB70|A0A669KB70_HUMAN;P04114|APOB_HUMAN			FALSE
EWFWDLATGTM(+15.99)K	34.26	1499.68	12	3.4	750.847	2	25.91	271000	1650000	5980	20210616_HS_C_50ng_F3-2.raw	2	P02790|HEMO_HUMAN;Q9BS19|Q9BS19_HUMAN	Oxidation (M)		FALSE
EYC(+57.02)GVPGDGDEELLR	41.37	1707.74	15	5	854.882	2	18.9137	17300	544000	3938	20210616_HS_C_50ng_F3-2.raw	1	P02760|AMBP_HUMAN	Carbamidomethylation	C3:Carbamidomethylation:1000.00	FALSE
EYSGTIASEANTYLN(+0.98)SK	37.84	1847.84	17	2.2	924.931	2	18.7133	103000	1340000	3790	20210616_HS_C_50ng_F4-3.raw	2	P04114|APOB_HUMAN	Deamidation (NQ)	N15:Deamidation (NQ):42.68	FALSE
EYSGTIASEANTYLNSK	59.59	1846.86	17	-0.5	924.436	2	19.4594	255000	5090000	3938	20210616_HS_C_50ng_F4-2.raw	5	P04114|APOB_HUMAN			FALSE
EYTDASFTNR	45.77	1202.52	10	0.4	602.268	2	6.9887	2190000	7320000	1259	20210616_HS_C_50ng_F3-2.raw	7	E9PFZ2|E9PFZ2_HUMAN;H7C5R1|H7C5R1_HUMAN;P00450|CERU_HUMAN			FALSE
EYVLPSFEVIVEPTEK	58.63	1877.97	16	3.8	939.994	2	26.7309	638000	4980000	6179	20210616_HS_C_50ng_F4-2.raw	3	P01024|CO3_HUMAN			FALSE
FAHYVVTSQVVNTANEAR	63.52	2005	18	1.8	669.342	3	18.636	1160000	8970000	4304	20210616_HS_C_50ng_F2-1.raw	3	P19827|ITIH1_HUMAN;F8WAS2|F8WAS2_HUMAN			FALSE
FATTFYQHLADSK	45.22	1527.74	13	-0.6	510.252	3	19.514	972000	6600000	4601	20210616_HS_C_50ng_F2-1.raw	2	P01008|ANT3_HUMAN;Q8TCE1|Q8TCE1_HUMAN			FALSE
FDEFFSE(+21.98)GC(+57.02)APGSK	46.61	1598.63	14	4.2	533.887	3	19.3579	119000	1600000	4096	20210616_HS_C_50ng_F3-3.raw	2	H7C5E8|H7C5E8_HUMAN;P02787|TRFE_HUMAN	Sodium adduct; Carbamidomethylation	E7:Sodium adduct:27.33;C9:Carbamidomethylation:1000.00	FALSE
FDEFFSEGC(+57.02)APGSK	78.8	1576.65	14	-1.5	789.331	2	19.4239	21200000	167000000	4012	20210616_HS_C_50ng_F3-1.raw	30	H7C5E8|H7C5E8_HUMAN;P02787|TRFE_HUMAN	Carbamidomethylation	C9:Carbamidomethylation:1000.00	FALSE
FEDGVLDPDYPR	54.4	1421.65	12	-6.1	711.826	2	19.2158	8860000	61600000	3950	20210616_HS_C_50ng_F3-1.raw	15	P04004|VTNC_HUMAN			FALSE
FEVQVTVPK	48.41	1045.58	9	2.7	523.799	2	19.2288	1060000	9720000	4026	20210616_HS_C_50ng_F3-2.raw	4	P01023|A2MG_HUMAN			FALSE
FKDLGEENFK	57.61	1225.6	10	0.2	613.806	2	14.8612	77700000	429000000	2750	20210616_HS_C_50ng_F1-3.raw	55	A0A0C4DGB6|A0A0C4DGB6_HUMAN;A0A087WWT3|A0A087WWT3_HUMAN;P02768|ALBU_HUMAN;H7C013|H7C013_HUMAN;C9JKR2|C9JKR2_HUMAN;B7WNR0|B7WNR0_HUMAN			FALSE
FLEQQNQVLQTK	56.13	1474.78	12	2.3	738.398	2	16.1916	3260000	15600000	3113	20210616_HS_C_50ng_F3-1.raw	6	#CONTAM#cont|000132|;P35908|K22E_HUMAN;#CONTAM#cont|000135|;#CONTAM#cont|000134|;P04264|K2C1_HUMAN			FALSE
FM(+15.99)QAVTGWK	43.45	1082.52	9	2.3	542.269	2	15.6555	912000	1850000	3331	20210616_HS_C_50ng_F2-2.raw	2	P01019|ANGT_HUMAN	Oxidation (M)		FALSE
FN(+0.98)WYVDGVEVHNAK	30.66	1677.78	14	3.9	560.269	3	21.013	60700	474000	5023	20210616_HS_C_50ng_F2-2.raw	1	P01857|IGHG1_HUMAN;A0A0A0MS08|A0A0A0MS08_HUMAN	Deamidation (NQ)	N2:Deamidation (NQ):74.64	FALSE
FNAVLTNPQGDYDTSTGK	70.02	1926.9	18	1.9	964.457	2	18.1666	1080000	8700000	3615	20210616_HS_C_50ng_F4-3.raw	3	P02747|C1QC_HUMAN			FALSE
FNWYVDGVEVHNAK	79.09	1676.79	14	4.6	839.408	2	21.5066	29500000	302000000	5121	20210616_HS_C_50ng_F2-2.raw	38	P01857|IGHG1_HUMAN;A0A0A0MS08|A0A0A0MS08_HUMAN			FALSE
FPEVDVLTK	55.13	1046.56	9	4.1	524.292	2	20.1213	6020000	36100000	4732	20210616_HS_C_50ng_F2-2.raw	3	P04114|APOB_HUMAN			FALSE
FPKAEFAEVSK	62.52	1251.65	11	-0.2	418.224	3	16.9635	211000	1860000	3117	20210616_HS_C_50ng_F1-2.raw	3	A0A0C4DGB6|A0A0C4DGB6_HUMAN;P02768|ALBU_HUMAN;C9JKR2|C9JKR2_HUMAN;D6RHD5|D6RHD5_HUMAN;B7WNR0|B7WNR0_HUMAN;H0YA55|H0YA55_HUMAN			FALSE
FPSGTFEQVSQLVK	57.84	1565.81	14	2.7	783.914	2	23.6194	1780000	10900000	5353	20210616_HS_C_50ng_F3-1.raw	3	D6RBJ7|D6RBJ7_HUMAN;P02774|VTDB_HUMAN;D6RF20|D6RF20_HUMAN;D6RF35|D6RF35_HUMAN			FALSE
FQN(+0.98)ALLVR	41.56	960.539	8	-1	481.276	2	17.2077	1830000	16500000	3443	20210616_HS_C_50ng_F3-3.raw	6	A0A0C4DGB6|A0A0C4DGB6_HUMAN;A0A087WWT3|A0A087WWT3_HUMAN;P02768|ALBU_HUMAN;C9JKR2|C9JKR2_HUMAN;D6RHD5|D6RHD5_HUMAN;B7WNR0|B7WNR0_HUMAN;H0YA55|H0YA55_HUMAN	Deamidation (NQ)	N3:Deamidation (NQ):18.17	FALSE
FQNALLVR	56.29	959.555	8	1.6	480.786	2	21.1111	421000000	2060000000	5015	20210616_HS_C_50ng_F2-2.raw	169	A0A0C4DGB6|A0A0C4DGB6_HUMAN;A0A087WWT3|A0A087WWT3_HUMAN;P02768|ALBU_HUMAN;C9JKR2|C9JKR2_HUMAN;D6RHD5|D6RHD5_HUMAN;B7WNR0|B7WNR0_HUMAN;H0YA55|H0YA55_HUMAN			FALSE
FQPTLLTLPR	52.54	1184.69	10	1.8	593.354	2	23.5608	7840000	51000000	5647	20210616_HS_C_50ng_F2-2.raw	7	H9KV48|H9KV48_HUMAN;P05155|IC1_HUMAN;E9PGN7|E9PGN7_HUMAN			FALSE
FQSVFTVTR	47.32	1083.57	9	2.8	542.794	2	19.044	308000	3280000	4404	20210616_HS_C_50ng_F2-2.raw	2	P02747|C1QC_HUMAN			FALSE
FSAIC(+57.02)QGDGTWSPR	63.35	1580.7	14	-3.1	791.357	2	18.7349	380000	4000000	3818	20210616_HS_C_50ng_F3-1.raw	3	P04003|C4BPA_HUMAN	Carbamidomethylation	C5:Carbamidomethylation:1000.00	FALSE
FSGQLNSHGC(+57.02)FYQQVK	36.7	1898.87	16	3.4	633.967	3	17.9228	1230000	8040000	4070	20210616_HS_C_50ng_F2-2.raw	2	P01023|A2MG_HUMAN	Carbamidomethylation	C10:Carbamidomethylation:1000.00	FALSE
FSGSGAGTDFTLK	30.1	1286.61	13	2.7	644.316	2	17.3084	104000	1210000	3921	20210616_HS_C_50ng_F2-1.raw	1				FALSE
FSGSGSGTDFTLK	50.58	1302.61	13	0.2	652.312	2	16.6398	13800000	141000000	3230	20210616_HS_C_50ng_F3-1.raw	10	A0A5H1ZRS2|A0A5H1ZRS2_HUMAN			FALSE
FSGSGSGTDFTLTISR	68.29	1631.78	16	4.1	816.9	2	20.6339	1230000	6650000	4414	20210616_HS_C_50ng_F3-1.raw	3	A0A0C4DH25|KVD20_HUMAN			FALSE
FSGSN(+0.98)SGNTATLTISR	63.4	1612.77	16	3	807.394	2	15.9216	310000	1480000	3077	20210616_HS_C_50ng_F4-3.raw	2		Deamidation (NQ)	N5:Deamidation (NQ):47.09	FALSE
FSGSNSGN(+0.98)TATLTISR	51.42	1612.77	16	7.5	807.398	2	15.7869	57300	661000	3037	20210616_HS_C_50ng_F3-1.raw	1		Deamidation (NQ)	N8:Deamidation (NQ):28.36	FALSE
FSGSNSGNTATLTISR	63.56	1611.79	16	3.1	806.902	2	15.2307	2810000	10800000	2891	20210616_HS_C_50ng_F3-2.raw	6				FALSE
FSPATHPSEGLEENYC(+57.02)R	51.83	1992.86	17	2.6	665.297	3	16.271	1340000	7230000	3557	20210616_HS_C_50ng_F2-2.raw	3	P00747|PLMN_HUMAN	Carbamidomethylation	C16:Carbamidomethylation:1000.00	FALSE
FTC(+57.02)TVTHTDLPSPLK	66.96	1715.86	15	1.5	858.936	2	19.6404	5390000	35200000	4630	20210616_HS_C_50ng_F2-1.raw	5	P01871|IGHM_HUMAN	Carbamidomethylation	C3:Carbamidomethylation:1000.00	FALSE
FYNQVSTPLLR	55.63	1336.71	11	1.5	669.365	2	20.4165	1890000	14500000	4412	20210616_HS_C_50ng_F3-1.raw	3	#CONTAM#cont|000108|;Q5T985|Q5T985_HUMAN;P19823|ITIH2_HUMAN			FALSE
FYYIYNEK	58.78	1138.53	8	1.8	570.275	2	18.0641	8860000	34600000	4104	20210616_HS_C_50ng_F2-2.raw	14	P01024|CO3_HUMAN			FALSE
GAYPLSIEPIGVR	69.93	1370.76	13	4.4	686.388	2	22.8897	7050000	65500000	5503	20210616_HS_C_50ng_F2-2.raw	9	E9PFZ2|E9PFZ2_HUMAN;H7C5R1|H7C5R1_HUMAN;P00450|CERU_HUMAN			FALSE
GC(+57.02)PDVQASLPDAK	54.53	1356.63	13	2.2	679.326	2	15.2391	509000	2030000	2916	20210616_HS_C_50ng_F3-3.raw	3	Q96PD5|PGRP2_HUMAN	Carbamidomethylation	C2:Carbamidomethylation:1000.00	FALSE
GDAVC(+57.02)TESGWRPLPSC(+57.02)EEK	44.94	2176.95	19	1	726.66	3	18.0195	579000	5540000	4123	20210616_HS_C_50ng_F2-3.raw	3	A0A0D9SG88|A0A0D9SG88_HUMAN;P08603|CFAH_HUMAN;Q5TFM2|Q5TFM2_HUMAN	Carbamidomethylation; Carbamidomethylation	C5:Carbamidomethylation:1000.00;C16:Carbamidomethylation:1000.00	FALSE
GDQDATM(+15.99)SILDISM(+15.99)M(+15.99)TGFAPDTDDLK	40.43	2835.21	26	2.8	946.081	3	24.756	224000	1810000	5645	20210616_HS_C_50ng_F4-2.raw	1	P01024|CO3_HUMAN;M0QYC8|M0QYC8_HUMAN	Oxidation (M); Oxidation (M); Oxidation (M)		FALSE
GDTFSC(+57.02)M(+15.99)VGHEALPLAFTQK	62.21	2224.03	20	5.1	742.354	3	23.1989	1030000	7120000	5565	20210616_HS_C_50ng_F2-2.raw	3	P01876|IGHA1_HUMAN;A0A286YEY1|A0A286YEY1_HUMAN	Carbamidomethylation; Oxidation (M)	C6:Carbamidomethylation:1000.00	FALSE
GEC(+57.02)QAEGVLFFQGDR	62.75	1711.76	15	6.5	856.894	2	21.6097	2660000	19900000	4629	20210616_HS_C_50ng_F4-2.raw	17	P02790|HEMO_HUMAN;Q9BS19|Q9BS19_HUMAN	Carbamidomethylation	C3:Carbamidomethylation:1000.00	FALSE
GEC(+57.02)VPGEQEPEPILIPR	69.22	1918.95	17	3.8	960.484	2	21.4901	1050000	7600000	4485	20210616_HS_C_50ng_F4-1.raw	3	P02760|AMBP_HUMAN;S4R471|S4R471_HUMAN	Carbamidomethylation	C3:Carbamidomethylation:1000.00	FALSE
GEVQAM(+15.99)LGQSTEELR	59.6	1662.79	15	-0.5	832.401	2	16.6309	1130000	11500000	3289	20210616_HS_C_50ng_F3-3.raw	7	E7ERP7|E7ERP7_HUMAN;E9PEV4|E9PEV4_HUMAN;P02649|APOE_HUMAN;H0Y7L5|H0Y7L5_HUMAN	Oxidation (M)		FALSE
GFEPTLEALFGK	62.39	1307.68	12	2.4	654.847	2	26.7312	381000	2830000	6293	20210616_HS_C_50ng_F2-2.raw	4	A8MUN2|A8MUN2_HUMAN;P04114|APOB_HUMAN			FALSE
GFSLDEATNLN(+0.98)GGLLR	50.8	1676.84	16	3.1	839.428	2	23.9675	174000	1750000	5304	20210616_HS_C_50ng_F4-1.raw	2	P19827|ITIH1_HUMAN	Deamidation (NQ)	N11:Deamidation (NQ):32.28	FALSE
GFYPSDIAVEWESN(+0.98)GQPENNYK	25.24	2544.11	22	3.8	1273.07	2	23.9675	80800	363000	5300	20210616_HS_C_50ng_F4-1.raw	1	P01857|IGHG1_HUMAN;A0A0A0MS08|A0A0A0MS08_HUMAN;A0A0A0MS07|A0A0A0MS07_HUMAN	Deamidation (NQ)	N14:Deamidation (NQ):0.00	FALSE
GGYTLVSGYPK	63.27	1140.58	11	-3.7	571.296	2	17.1813	12800000	105000000	3820	20210616_HS_C_50ng_F2-2.raw	11	P02790|HEMO_HUMAN			FALSE
GHFSISIPVK	63.15	1083.61	10	5.5	542.814	2	20.4161	1110000	8750000	3999	20210616_HS_C_50ng_F1-3.raw	3	P01023|A2MG_HUMAN			FALSE
GHLFLQTDQPIYNPGQR	58.36	1983	17	3.8	662.009	3	20.9357	626000	3850000	5015	20210616_HS_C_50ng_F2-1.raw	2	A0A140TA32|A0A140TA32_HUMAN;A0A140TA29|A0A140TA29_HUMAN;P0C0L4|CO4A_HUMAN;P0C0L5|CO4B_HUMAN;A0A0G2JPR0|A0A0G2JPR0_HUMAN;A0A140TA49|A0A140TA49_HUMAN;F5GXS0|F5GXS0_HUMAN;A0A140TA44|A0A140TA44_HUMAN;A0A0G2JL54|A0A0G2JL54_HUMAN			FALSE
GIISALLVPPETEEAK	62.22	1665.92	16	3.1	556.315	3	24.9226	1920000	7850000	5695	20210616_HS_C_50ng_F3-1.raw	6	A8MUN2|A8MUN2_HUMAN;P04114|APOB_HUMAN			FALSE
GISTSAASPAVGTVGM(+15.99)D(+21.98)M(+15.99)DEDDDFSK	60	2656.08	26	2.9	886.369	3	18.1821	223000	3070000	3556	20210616_HS_C_50ng_F4-2.raw	3	P04114|APOB_HUMAN	Oxidation (M); Sodium adduct; Oxidation (M)	M16:Oxidation (M):1000.00;D17:Sodium adduct:32.28;M18:Oxidation (M):1000.00	FALSE
GISTSAASPAVGTVGM(+15.99)DM(+15.99)DEDDDFSK	63	2634.09	26	2.6	879.041	3	18.1599	2070000	18500000	3614	20210616_HS_C_50ng_F4-3.raw	3	P04114|APOB_HUMAN	Oxidation (M); Oxidation (M)		FALSE
GLC(+57.02)VATPVQLR	57.95	1212.66	11	5.8	607.343	2	19.8931	1190000	13400000	4675	20210616_HS_C_50ng_F2-2.raw	3	A0A140TA32|A0A140TA32_HUMAN;A0A140TA29|A0A140TA29_HUMAN;P0C0L4|CO4A_HUMAN;P0C0L5|CO4B_HUMAN;A0A0G2JPR0|A0A0G2JPR0_HUMAN;A0A140TA49|A0A140TA49_HUMAN;F5GXS0|F5GXS0_HUMAN;A0A140TA44|A0A140TA44_HUMAN;A0A3B3ISA6|A0A3B3ISA6_HUMAN;A0A0G2JL54|A0A0G2JL54_HUMAN	Carbamidomethylation	C3:Carbamidomethylation:1000.00	FALSE
GLETSLAEC(+57.02)TFTK	55.5	1455.69	13	0.7	728.854	2	19.2876	160000	2430000	4067	20210616_HS_C_50ng_F3-3.raw	3	G3XAM2|G3XAM2_HUMAN;A0A2R8Y3M9|A0A2R8Y3M9_HUMAN;A0A087X0I2|A0A087X0I2_HUMAN;E7ETH0|E7ETH0_HUMAN;P05156|CFAI_HUMAN	Carbamidomethylation	C9:Carbamidomethylation:1000.00	FALSE
GLEVTITAR	45.09	958.545	9	1.1	480.28	2	16.2894			3614	20210616_HS_C_50ng_F2-1.raw	1	P01024|CO3_HUMAN			FALSE
GPDVLTATVSGK	56.88	1143.61	12	4	572.816	2	14.3999	1550000	3690000	2699	20210616_HS_C_50ng_F3-1.raw	4	Q14624|ITIH4_HUMAN;B7ZKJ8|B7ZKJ8_HUMAN;H7C0L5|H7C0L5_HUMAN			FALSE
GPEVQLVAHSPWLK	28	1559.85	14	2	520.957	3	22.3519	134000	1110000	5433	20210616_HS_C_50ng_F2-1.raw	1	A0A140TA32|A0A140TA32_HUMAN;A0A140TA29|A0A140TA29_HUMAN;P0C0L4|CO4A_HUMAN;P0C0L5|CO4B_HUMAN;A0A0G2JPR0|A0A0G2JPR0_HUMAN;A0A140TA49|A0A140TA49_HUMAN;F5GXS0|F5GXS0_HUMAN;A0A140TA44|A0A140TA44_HUMAN;A0A0G2JL54|A0A0G2JL54_HUMAN			FALSE
GPLDQLEK	44.23	898.476	8	-1.1	450.245	2	14.3091	738000	513000	2560	20210616_HS_C_50ng_F2-2.raw	3	P05546|HEP2_HUMAN			FALSE
GPSVFPLAPC(+57.02)SR	63.54	1286.64	12	1.2	644.33	2	20.2221	65500000	712000000	4935	20210616_HS_C_50ng_F2-2.raw	26	P01859|IGHG2_HUMAN;A0A286YEY4|A0A286YEY4_HUMAN	Carbamidomethylation	C10:Carbamidomethylation:1000.00	FALSE
GPSVFPLAPSSK	71.92	1185.64	12	5.6	593.83	2	21.9163	141000000	2170000000	5243	20210616_HS_C_50ng_F2-2.raw	60	P01857|IGHG1_HUMAN;A0A0A0MS08|A0A0A0MS08_HUMAN;A0A0A0MS07|A0A0A0MS07_HUMAN			FALSE
GPSVFPLAPSSK(+21.98)	36.57	1207.62	12	-0.1	604.818	2	19.2454	2710000	25000000	4487	20210616_HS_C_50ng_F2-1.raw	4	P01857|IGHG1_HUMAN;A0A0A0MS08|A0A0A0MS08_HUMAN;A0A0A0MS07|A0A0A0MS07_HUMAN	Sodium adduct		FALSE
GQELC(+57.02)ADYSENTFTEYK	56.11	2053.86	17	0.5	1027.94	2	19.1898	162000	1900000	3783	20210616_HS_C_50ng_F4-1.raw	2	P02774|VTDB_HUMAN;D6RF35|D6RF35_HUMAN	Carbamidomethylation	C5:Carbamidomethylation:1000.00	FALSE
GQGTLSVVTM(+15.99)YHAK	27.26	1506.75	14	3.6	754.385	2	16.0777	227000	892000	3532	20210616_HS_C_50ng_F2-1.raw	1	P01024|CO3_HUMAN;M0QYC8|M0QYC8_HUMAN	Oxidation (M)		FALSE
GSFEFPVGDAVSK	59.22	1338.65	13	4.4	670.333	2	20.8193	4950000	43600000	4943	20210616_HS_C_50ng_F2-2.raw	7	A0A140TA32|A0A140TA32_HUMAN;A0A140TA29|A0A140TA29_HUMAN;P0C0L4|CO4A_HUMAN;P0C0L5|CO4B_HUMAN;A0A0G2JPR0|A0A0G2JPR0_HUMAN;A0A140TA49|A0A140TA49_HUMAN;F5GXS0|F5GXS0_HUMAN;A0A140TA44|A0A140TA44_HUMAN;A0A3B3ISA6|A0A3B3ISA6_HUMAN;A0A0G2JL54|A0A0G2JL54_HUMAN			FALSE
GSFPWQAK	57.08	919.455	8	1.6	460.736	2	17.2905	20000000	181000000	4050	20210616_HS_C_50ng_F2-2.raw	16	P00738|HPT_HUMAN;A0A087WU08|A0A087WU08_HUMAN;H0Y300|H0Y300_HUMAN;A0A0C4DGL8|A0A0C4DGL8_HUMAN;J3QR68|J3QR68_HUMAN			FALSE
GSLGGGFSSGGFSGGSFSR	45.88	1706.76	19	5.2	854.394	2	20.0664	20000	428000	4242	20210616_HS_C_50ng_F3-1.raw	2	#CONTAM#cont|000133|;P13645|K1C10_HUMAN;#CONTAM#cont|000129|;#CONTAM#cont|000136|;#CONTAM#cont|000122|			FALSE
GSLVQASEANLQAAQDFVR	70.33	2003.01	19	1.6	1002.51	2	23.4331	881000	12400000	5127	20210616_HS_C_50ng_F4-1.raw	6	P19827|ITIH1_HUMAN			FALSE
GSPAINVAVHVFR	72.01	1365.75	13	1.3	683.884	2	21.2396	1390000	11000000	4188	20210616_HS_C_50ng_F1-3.raw	6	P02766|TTHY_HUMAN;A0A087WT59|A0A087WT59_HUMAN			FALSE
GTEAAGAM(+15.99)FLE(+21.98)AIPM(+15.99)SIPPEVK	37.24	2312.1	22	-0.2	771.709	3	25.9178	722000	3350000	5782	20210616_HS_C_50ng_F4-1.raw	3		Oxidation (M); Sodium adduct; Oxidation (M)	M8:Oxidation (M):1000.00;E11:Sodium adduct:2.02;M15:Oxidation (M):1000.00	FALSE
GTEAAGAM(+15.99)FLEAIPM(+15.99)SIPPEVK	54.39	2290.12	22	0.7	764.382	3	25.8652	27000000	115000000	5926	20210616_HS_C_50ng_F4-1.raw	11		Oxidation (M); Oxidation (M)		FALSE
GTWTQPFDLASTR	39.38	1478.72	13	8.2	740.371	2	22.0895	362000	3930000	4954	20210616_HS_C_50ng_F3-2.raw	3	P08185|CBG_HUMAN			FALSE
GVALHRPDVYLLPPAR	67.4	1773	16	2.2	592.01	3	21.6303	3060000	14200000	4274	20210616_HS_C_50ng_F1-1.raw	6	P01871|IGHM_HUMAN			FALSE
GVTSVSQIFHSPDLAIR	42	1825.97	17	4.4	609.668	3	24.3306	1080000	7060000	5784	20210616_HS_C_50ng_F2-3.raw	5	H9KV48|H9KV48_HUMAN;P05155|IC1_HUMAN;E9PGN7|E9PGN7_HUMAN			FALSE
GWVTDGFSSLK	35.35	1195.59	11	2	598.802	2	21.4362	51700	509000	5168	20210616_HS_C_50ng_F2-1.raw	1	P02656|APOC3_HUMAN;B0YIW2|B0YIW2_HUMAN			FALSE
GYTQQLAFR	64.5	1082.55	9	2	542.284	2	16.5099	9910000	101000000	3614	20210616_HS_C_50ng_F2-2.raw	14	P01024|CO3_HUMAN			FALSE
HLSLLTTLSNR	65.57	1253.71	11	0	418.91	3	20.4744	423000	2670000	4025	20210616_HS_C_50ng_F1-1.raw	4	D6RBJ7|D6RBJ7_HUMAN;P02774|VTDB_HUMAN;D6RF35|D6RF35_HUMAN			FALSE
HNVYIN(+0.98)GITYTPVSSTNEK	80.62	2137.03	19	1.4	713.352	3	19.4048	6000000	43400000	4522	20210616_HS_C_50ng_F2-2.raw	14	P01023|A2MG_HUMAN	Deamidation (NQ)	N6:Deamidation (NQ):49.79	FALSE
HPDYSVVLLLR	64.06	1310.73	11	0.4	656.375	2	23.7192	3780000	14200000	4737	20210616_HS_C_50ng_F1-2.raw	6	A0A0C4DGB6|A0A0C4DGB6_HUMAN;P02768|ALBU_HUMAN;C9JKR2|C9JKR2_HUMAN;D6RHD5|D6RHD5_HUMAN;B7WNR0|B7WNR0_HUMAN;H0YA55|H0YA55_HUMAN			FALSE
HQPQEFPTYVEPTNDEIC(+57.02)EAFR	54.43	2706.2	22	2.4	903.077	3	23.5766	102000	1040000	5351	20210616_HS_C_50ng_F3-1.raw	1	D6RBJ7|D6RBJ7_HUMAN;P02774|VTDB_HUMAN;D6RF35|D6RF35_HUMAN	Carbamidomethylation	C18:Carbamidomethylation:1000.00	FALSE
HRLEDM(+15.99)EQALSPSVFK	41.69	1901.93	16	-4.8	634.981	3	18.9648	60800	865000	3634	20210616_HS_C_50ng_F1-1.raw	2	P05155|IC1_HUMAN;E9PGN7|E9PGN7_HUMAN	Oxidation (M)		FALSE
HSTIFENLANK	74.38	1272.65	11	-1	637.33	2	17.0847	17700000	90200000	3157	20210616_HS_C_50ng_F1-2.raw	23	C9JVG0|C9JVG0_HUMAN;P02787|TRFE_HUMAN			FALSE
HTFM(+15.99)GVVSLGSPSGEVSHPR	80.4	2096.01	20	3.8	525.012	4	18.8088	1550000	12300000	3586	20210616_HS_C_50ng_F1-3.raw	9	P02765|FETUA_HUMAN;C9JV77|C9JV77_HUMAN	Oxidation (M)		FALSE
IADVTSGLIGGEDGR	60.44	1458.73	15	0.8	730.374	2	18.1986	261000	2590000	3677	20210616_HS_C_50ng_F3-1.raw	3				FALSE
IAELSATAQEIIK	56.68	1385.78	13	2.4	693.897	2	20.7649	1370000	11800000	4446	20210616_HS_C_50ng_F3-1.raw	3	P04114|APOB_HUMAN			FALSE
IAPQLSTEELVSLGEK	59.68	1712.92	16	4.5	857.471	2	22.9829	999000	8560000	5169	20210616_HS_C_50ng_F3-1.raw	4	P43652|AFAM_HUMAN			FALSE
IAQWQSFQLEGGLK	68.77	1603.84	14	3	802.928	2	23.5118	2900000	22500000	5341	20210616_HS_C_50ng_F3-1.raw	5	P01023|A2MG_HUMAN			FALSE
IASFSQNC(+57.02)DIYPGK	55.94	1598.74	14	3	800.38	2	17.8943	1190000	10700000	3621	20210616_HS_C_50ng_F3-2.raw	3	P01042|KNG1_HUMAN	Carbamidomethylation	C8:Carbamidomethylation:1000.00	FALSE
IAYGTQGSSGYSLR	55.12	1458.71	14	2.7	730.364	2	15.7376	155000	1180000	3049	20210616_HS_C_50ng_F3-3.raw	2	H0YAC1|H0YAC1_HUMAN;E9PBC5|E9PBC5_HUMAN;P03952|KLKB1_HUMAN			FALSE
IDDIWNLEVK	49.55	1243.64	10	3.6	622.832	2	23.134	1650000	10300000	5209	20210616_HS_C_50ng_F3-1.raw	6	P04114|APOB_HUMAN			FALSE
IDSLLENDR	44.02	1073.54	9	0.8	537.775	2	11.493	2280000	3080000	2478	20210616_HS_C_50ng_F2-2.raw	3	H0YLK8|H0YLK8_HUMAN;P10909|CLUS_HUMAN;H0YC35|H0YC35_HUMAN;E7ETB4|E7ETB4_HUMAN;E7ERK6|E7ERK6_HUMAN			FALSE
IDTQDIEASHYR	42.16	1446.67	12	0.1	483.233	3	13.475	74500	384000	2918	20210616_HS_C_50ng_F2-3.raw	1	P01031|CO5_HUMAN			FALSE
IDVHLVPDR	52.92	1062.58	9	0.9	532.299	2	16.9246	816000	3940000	3112	20210616_HS_C_50ng_F1-3.raw	3	P08603|CFAH_HUMAN			FALSE
IEC(+57.02)VSAE(+21.98)TTEDC(+57.02)IAK	38.64	1746.74	15	3.2	583.256	3	15.3082	755000	4360000	2903	20210616_HS_C_50ng_F3-1.raw	4	P02787|TRFE_HUMAN	Carbamidomethylation; Sodium adduct; Carbamidomethylation	C3:Carbamidomethylation:1000.00;E7:Sodium adduct:0.00;C12:Carbamidomethylation:1000.00	FALSE
IEC(+57.02)VSAETTEDC(+57.02)IAK	65.62	1724.76	15	0.2	863.387	2	15.3269	31400000	275000000	3044	20210616_HS_C_50ng_F3-1.raw	26	P02787|TRFE_HUMAN	Carbamidomethylation; Carbamidomethylation	C3:Carbamidomethylation:1000.00;C12:Carbamidomethylation:1000.00	FALSE
IEGNLIFDPNNYLPK	54.18	1745.9	15	6.3	873.962	2	26.0031	886000	5830000	5989	20210616_HS_C_50ng_F4-2.raw	7	A8MUN2|A8MUN2_HUMAN;P04114|APOB_HUMAN			FALSE
IEIPLPFGGK	53.19	1069.62	10	4.6	535.818	2	24.698	2130000	9340000	5884	20210616_HS_C_50ng_F2-2.raw	3	P04114|APOB_HUMAN			FALSE
IFFYDSENPPASEVLR	35.89	1882.91	16	3.5	942.466	2	23.9052	485000	4700000	5452	20210616_HS_C_50ng_F3-1.raw	4	P27169|PON1_HUMAN			FALSE
IGESIELTC(+57.02)PK	52.88	1245.63	11	2.8	623.823	2	17.3023	275000	2520000	3404	20210616_HS_C_50ng_F3-1.raw	3		Carbamidomethylation	C9:Carbamidomethylation:1000.00	FALSE
IGQDGISTSATTNLK	64.47	1504.77	15	1.5	753.395	2	14.9767	3320000	28300000	2815	20210616_HS_C_50ng_F3-1.raw	6	P04114|APOB_HUMAN			FALSE
IITHPN(+0.98)FNGNTLDNDIM(+15.99)LIK	47.03	2299.15	20	2.8	767.395	3	24.2661	227000	1570000	5767	20210616_HS_C_50ng_F2-3.raw	1	#CONTAM#cont|000144|;#CONTAM#cont|000142|;#CONTAM#cont|000023|;#CONTAM#cont|000143|;#CONTAM#cont|000141|;#CONTAM#cont|000040|;#CONTAM#cont|000032|	Deamidation (NQ); Oxidation (M)	N6:Deamidation (NQ):0.00;M17:Oxidation (M):1000.00	FALSE
IITHPNFNGNTLDNDIM(+15.99)LIK	67.08	2298.17	20	5.7	767.068	3	24.0466	396000	3830000	5768	20210616_HS_C_50ng_F2-2.raw	3	#CONTAM#cont|000144|;#CONTAM#cont|000142|;#CONTAM#cont|000023|;#CONTAM#cont|000143|;#CONTAM#cont|000141|;#CONTAM#cont|000040|;#CONTAM#cont|000032|	Oxidation (M)		FALSE
ILGGHLDAK	43.42	922.524	9	-2.7	462.268	2	6.434	4090000	5830000	1104	20210616_HS_C_50ng_F1-2.raw	5	P00738|HPT_HUMAN;A0A087WU08|A0A087WU08_HUMAN;H0Y300|H0Y300_HUMAN;A0A0C4DGL8|A0A0C4DGL8_HUMAN;J3QR68|J3QR68_HUMAN			FALSE
ILLQ(+0.98)GTPVAQM(+15.99)TEDAVDAER	39.39	2173.06	20	-0.1	725.36	3	23.488			5149	20210616_HS_C_50ng_F4-1.raw	1	P01024|CO3_HUMAN	Deamidation (NQ); Oxidation (M)	Q4:Deamidation (NQ):5.14;M11:Oxidation (M):1000.00	FALSE
ILLQGTPVAQ(+0.98)M(+15.99)TEDAVDAER	52.36	2173.06	20	3.8	725.362	3	22.1032			4686	20210616_HS_C_50ng_F4-1.raw	1	P01024|CO3_HUMAN	Deamidation (NQ); Oxidation (M)	Q10:Deamidation (NQ):6.67;M11:Oxidation (M):1000.00	FALSE
ILLQGTPVAQM(+15.99)TE(+21.98)DAVDAER	50.11	2194.06	20	4.7	732.362	3	20.8827	879000	14000000	4400	20210616_HS_C_50ng_F4-2.raw	2	P01024|CO3_HUMAN	Oxidation (M); Sodium adduct	M11:Oxidation (M):1000.00;E13:Sodium adduct:17.01	FALSE
ILLQGTPVAQM(+15.99)TEDAVDAER	70.86	2172.07	20	1.4	1087.05	2	20.8273	23900000	201000000	4261	20210616_HS_C_50ng_F4-1.raw	26	P01024|CO3_HUMAN	Oxidation (M)		FALSE
ILLQGTPVAQMTEDAVDAER	45.29	2156.08	20	2.2	719.702	3	24.4432	116000	1550000	5569	20210616_HS_C_50ng_F4-2.raw	3	P01024|CO3_HUMAN			FALSE
IM(+15.99)N(+0.98)GEADAM(+15.99)SLDGGFVYIAGK	67.54	2190.98	21	-2.4	731.333	3	22.4859	14200000	87500000	4967	20210616_HS_C_50ng_F4-1.raw	9	P02787|TRFE_HUMAN	Oxidation (M); Deamidation (NQ); Oxidation (M)		FALSE
IM(+15.99)NGEADAM(+15.99)SLDGGFVYIAGK	64.71	2190	21	-1.4	731.005	3	22.2761	2440000	22200000	4734	20210616_HS_C_50ng_F4-1.raw	6	P02787|TRFE_HUMAN	Oxidation (M); Oxidation (M)		FALSE
IN(+0.98)NQLTLDSNTK	49.91	1360.68	12	1.6	681.35	2	11.1625	477000	492000	2089	20210616_HS_C_50ng_F3-2.raw	1	P04114|APOB_HUMAN	Deamidation (NQ)	N2:Deamidation (NQ):0.00	FALSE
INN(+0.98)QLTLDSNTK	49.82	1360.68	12	2.9	681.351	2	12.1189	686000	905000	2249	20210616_HS_C_50ng_F3-3.raw	1	P04114|APOB_HUMAN	Deamidation (NQ)	N3:Deamidation (NQ):0.00	FALSE
INNQLTLDSNTK	50.34	1359.7	12	2.7	680.859	2	10.934	329000	660000	2074	20210616_HS_C_50ng_F3-3.raw	2	P04114|APOB_HUMAN			FALSE
IPIED(+21.98)GSGEVVLSR	48.01	1491.75	14	1.7	498.26	3	18.6648	332000	2940000	3870	20210616_HS_C_50ng_F3-3.raw	1	P01024|CO3_HUMAN	Sodium adduct	D5:Sodium adduct:0.00	FALSE
IPIEDGSGE(+21.98)VVLSR	53.02	1491.75	14	0	498.259	3	18.6998	747000	6020000	3806	20210616_HS_C_50ng_F3-1.raw	2	P01024|CO3_HUMAN	Sodium adduct	E9:Sodium adduct:11.12	FALSE
IPIEDGSGEVVLSR	66.26	1469.77	14	-3	735.891	2	18.8123	26100000	159000000	3919	20210616_HS_C_50ng_F3-1.raw	36	P01024|CO3_HUMAN			FALSE
IPLDLVPK	36.51	893.559	8	0.4	447.788	2	20.0696	951000	6690000	4723	20210616_HS_C_50ng_F2-3.raw	3	P01031|CO5_HUMAN			FALSE
IPSVQINFK	56.97	1044.6	9	4.6	523.308	2	20.4952	2230000	18000000	4837	20210616_HS_C_50ng_F2-2.raw	3	P04114|APOB_HUMAN			FALSE
IPTTFEN(+0.98)GR	46.16	1034.5	9	3.1	518.26	2	8.2916	2860000	4940000	1809	20210616_HS_C_50ng_F2-2.raw	7	P05090|APOD_HUMAN;C9JF17|C9JF17_HUMAN	Deamidation (NQ)		FALSE
IQNILTEEPK	46.55	1183.64	10	4.2	592.832	2	16.3326	4390000	22200000	3587	20210616_HS_C_50ng_F2-1.raw	7	P27169|PON1_HUMAN			FALSE
IQPSGGTNINEALLR	62.53	1581.85	15	-0.8	791.93	2	19.2344	5270000	53900000	3961	20210616_HS_C_50ng_F3-1.raw	8	#CONTAM#cont|000108|;Q5T985|Q5T985_HUMAN;P19823|ITIH2_HUMAN			FALSE
ISLPESLK	37.95	885.517	8	0.4	443.766	2	18.1049	14400000	150000000	4092	20210616_HS_C_50ng_F2-2.raw	9	P01024|CO3_HUMAN			FALSE
ITEN(+0.98)DIQIALDDAK	57.31	1558.77	14	2	780.395	2	20.1765	17100	459000	4171	20210616_HS_C_50ng_F4-2.raw	2	P04114|APOB_HUMAN	Deamidation (NQ)	N4:Deamidation (NQ):22.45	FALSE
ITENDIQIALDDAK	57.17	1557.79	14	6.3	779.907	2	21.2462	2570000	22700000	4674	20210616_HS_C_50ng_F3-3.raw	5	P04114|APOB_HUMAN			FALSE
ITLLSALVETR	55.79	1214.72	11	2.7	608.371	2	25.0931	1840000	11700000	5724	20210616_HS_C_50ng_F3-1.raw	6	G3V3A0|G3V3A0_HUMAN;P01011|AACT_HUMAN			FALSE
ITLPDFR	39.88	860.476	7	1.6	431.246	2	20.5238			4854	20210616_HS_C_50ng_F2-2.raw	3	P04114|APOB_HUMAN			FALSE
ITQVLHFTK	41.43	1085.62	9	1.9	543.82	2	16.7523	267000	1680000	3073	20210616_HS_C_50ng_F1-3.raw	3	A0A140TA32|A0A140TA32_HUMAN;A0A140TA29|A0A140TA29_HUMAN;P0C0L4|CO4A_HUMAN;P0C0L5|CO4B_HUMAN;A0A0G2JPR0|A0A0G2JPR0_HUMAN;A0A140TA49|A0A140TA49_HUMAN;F5GXS0|F5GXS0_HUMAN;A0A140TA44|A0A140TA44_HUMAN;A0A3B3ISA6|A0A3B3ISA6_HUMAN;A0A0G2JL54|A0A0G2JL54_HUMAN			FALSE
IVIEYVDR	41.02	1005.55	8	2.4	503.783	2	17.14	473000	3380000	3813	20210616_HS_C_50ng_F2-2.raw	2	G3XAM2|G3XAM2_HUMAN;A0A2R8Y3M9|A0A2R8Y3M9_HUMAN;E7ETH0|E7ETH0_HUMAN;P05156|CFAI_HUMAN			FALSE
IVLGQEQDSYGGK	52.77	1392.69	13	3.4	697.354	2	11.7961	1820000	3520000	2327	20210616_HS_C_50ng_F3-3.raw	3	P02743|SAMP_HUMAN			FALSE
IVQILPWEQNEQVK	47.04	1722.93	14	-0.4	862.472	2	23.6101	1530000	11200000	5356	20210616_HS_C_50ng_F3-1.raw	3	A8MUN2|A8MUN2_HUMAN;P04114|APOB_HUMAN			FALSE
IVSSAM(+15.99)EPDREYHFGQAVR	63.51	2207.04	19	0.9	552.769	4	17.1418	426000	4500000	3176	20210616_HS_C_50ng_F1-1.raw	2	A0A0D9SG88|A0A0D9SG88_HUMAN;P08603|CFAH_HUMAN	Oxidation (M)		FALSE
IWDVVEK	40.53	887.475	7	-0.5	444.745	2	15.8823	5970000	39000000	3632	20210616_HS_C_50ng_F2-2.raw	8	P01024|CO3_HUMAN			FALSE
KAADDTWEPFASGK	53.48	1521.71	14	0.6	761.863	2	17.8737	377000	3250000	4042	20210616_HS_C_50ng_F2-2.raw	3	P02766|TTHY_HUMAN;A0A087WT59|A0A087WT59_HUMAN			FALSE
KAEEEHLGILGPQLHADVGDK	77.05	2255.15	21	4.7	564.799	4	19.8843	1620000	14400000	3861	20210616_HS_C_50ng_F1-2.raw	6	E9PFZ2|E9PFZ2_HUMAN;H7C5R1|H7C5R1_HUMAN;P00450|CERU_HUMAN			FALSE
KDTVIKPLLVEPEGLEK	56.15	1907.1	17	3.6	477.784	4	21.7183	824000	7710000	4306	20210616_HS_C_50ng_F1-1.raw	6	P01023|A2MG_HUMAN			FALSE
KGEWVALNPLR	62.09	1281.72	11	3.3	428.248	3	21.1816	318000	4070000	4175	20210616_HS_C_50ng_F1-2.raw	8	A0A0D9SG88|A0A0D9SG88_HUMAN;P08603|CFAH_HUMAN;Q5TFM2|Q5TFM2_HUMAN			FALSE
KLSSWVLLM(+15.99)K	44.47	1219.7	10	3.4	610.859	2	21.1674	1140000	6870000	4162	20210616_HS_C_50ng_F1-2.raw	3		Oxidation (M)		FALSE
KLVAASQAALGL	58.14	1140.69	12	0.9	571.351	2	19.5953	18200000	272000000	4612	20210616_HS_C_50ng_F2-1.raw	12	A0A087WWT3|A0A087WWT3_HUMAN;P02768|ALBU_HUMAN;C9JKR2|C9JKR2_HUMAN;D6RHD5|D6RHD5_HUMAN;B7WNR0|B7WNR0_HUMAN;H0YA55|H0YA55_HUMAN			FALSE
KPDVSHGEM(+15.99)VSGFGPIYNYK	62.16	2240.06	20	3.1	561.023	4	19.8389	218000	2610000	3866	20210616_HS_C_50ng_F1-1.raw	4	P04003|C4BPA_HUMAN	Oxidation (M)		FALSE
KPVDEYKDC(+57.02)HLAQVPSHTVVAR	54.25	2548.29	22	0.6	638.079	4	17.0161	2150000	14800000	3151	20210616_HS_C_50ng_F1-3.raw	4	P02787|TRFE_HUMAN	Carbamidomethylation	C9:Carbamidomethylation:1000.00	FALSE
KPVEEYANC(+57.02)HLAR	35.97	1585.77	13	-0.4	529.596	3	7.1809	3450000	9240000	1170	20210616_HS_C_50ng_F1-2.raw	4	P02787|TRFE_HUMAN	Carbamidomethylation	C9:Carbamidomethylation:1000.00	FALSE
KPVPVPK	39.65	763.496	7	1.1	764.504	1	24.3952	36800	80800	5805	20210616_HS_C_50ng_F5-2.raw	1				FALSE
KQTALVELVK	47.2	1127.69	10	5.3	564.856	2	17.9719	79500000	534000000	3483	20210616_HS_C_50ng_F1-2.raw	34	A0A0C4DGB6|A0A0C4DGB6_HUMAN;A0A087WWT3|A0A087WWT3_HUMAN;P02768|ALBU_HUMAN;C9JKR2|C9JKR2_HUMAN;D6RHD5|D6RHD5_HUMAN;B7WNR0|B7WNR0_HUMAN;H0YA55|H0YA55_HUMAN			FALSE
KSASDLTWDNLK	55.29	1376.69	12	1	459.906	3	17.9029	138000	1060000	3392	20210616_HS_C_50ng_F1-3.raw	2	H7C5E8|H7C5E8_HUMAN;P02787|TRFE_HUMAN			FALSE
KVPQVSTPTLVE(+21.98)VSR	41.92	1660.91	15	-8	416.232	4	19.4605	47500000	320000000	4529	20210616_HS_C_50ng_F2-2.raw	13	A0A0C4DGB6|A0A0C4DGB6_HUMAN;#CONTAM#cont|000097|;#CONTAM#cont|000035|;A0A087WWT3|A0A087WWT3_HUMAN;P02768|ALBU_HUMAN;#CONTAM#cont|000017|;C9JKR2|C9JKR2_HUMAN;D6RHD5|D6RHD5_HUMAN;B7WNR0|B7WNR0_HUMAN;H0YA55|H0YA55_HUMAN	Sodium adduct	E12:Sodium adduct:38.16	FALSE
KVPQVSTPTLVEVSR	82.82	1638.93	15	-0.4	547.317	3	20.0013	375000000	4290000000	4702	20210616_HS_C_50ng_F2-2.raw	142	A0A0C4DGB6|A0A0C4DGB6_HUMAN;#CONTAM#cont|000097|;#CONTAM#cont|000035|;A0A087WWT3|A0A087WWT3_HUMAN;P02768|ALBU_HUMAN;#CONTAM#cont|000017|;C9JKR2|C9JKR2_HUMAN;D6RHD5|D6RHD5_HUMAN;B7WNR0|B7WNR0_HUMAN;H0YA55|H0YA55_HUMAN			FALSE
KYLYEIAR	47.49	1054.58	8	1	528.298	2	15.467	16400000	58700000	2880	20210616_HS_C_50ng_F1-3.raw	13	A0A0C4DGB6|A0A0C4DGB6_HUMAN;P02768|ALBU_HUMAN;H7C013|H7C013_HUMAN			FALSE
KYTYNYEAESSSGVPGTADSR	49.04	2281.01	21	-1.7	761.346	3	15.7418	68900	1080000	3464	20210616_HS_C_50ng_F2-3.raw	2	A8MUN2|A8MUN2_HUMAN;A0A669KB70|A0A669KB70_HUMAN;P04114|APOB_HUMAN			FALSE
LAAAVSNFGYDLYR	39.88	1558.78	14	4.2	780.399	2	22.6598	56100	644000	5090	20210616_HS_C_50ng_F3-1.raw	1	I3L4Z0|I3L4Z0_HUMAN;P36955|PEDF_HUMAN			FALSE
LAELPADALGPLQR	53.9	1462.81	14	6.3	732.419	2	22.4442	349000	3780000	5015	20210616_HS_C_50ng_F3-1.raw	3				FALSE
LALDNGGLAR	41.66	998.551	10	-0.5	500.284	2	14.3649	1270000	4550000	3091	20210616_HS_C_50ng_F2-3.raw	3	Q14624|ITIH4_HUMAN;B7ZKJ8|B7ZKJ8_HUMAN;H7C0L5|H7C0L5_HUMAN			FALSE
LALWGEHTGQLYSK	28.13	1601.82	14	2.9	534.949	3	20.8026	62500	678000	4977	20210616_HS_C_50ng_F2-1.raw	1	P04114|APOB_HUMAN			FALSE
LATALSLSNK	48.64	1016.59	10	0.8	509.301	2	15.1136	1490000	7170000	3236	20210616_HS_C_50ng_F2-2.raw	3	P04114|APOB_HUMAN			FALSE
LC(+57.02)M(+15.99)GSGLN(+0.98)LC(+57.02)EPNNK	40.22	1722.74	15	6	862.381	2	16.4002	652000	3610000	3327	20210616_HS_C_50ng_F3-3.raw	2	H7C5E8|H7C5E8_HUMAN;P02787|TRFE_HUMAN	Carbamidomethylation; Oxidation (M); Deamidation (NQ); Carbamidomethylation	C2:Carbamidomethylation:1000.00;M3:Oxidation (M):1000.00;N8:Deamidation (NQ):45.16;C10:Carbamidomethylation:1000.00	FALSE
LC(+57.02)M(+15.99)GSGLNLC(+57.02)EPNNK	69.07	1721.75	15	1.8	861.886	2	16.0346	6060000	34700000	3082	20210616_HS_C_50ng_F3-1.raw	7	H7C5E8|H7C5E8_HUMAN;P02787|TRFE_HUMAN	Carbamidomethylation; Oxidation (M); Carbamidomethylation	C2:Carbamidomethylation:1000.00;C10:Carbamidomethylation:1000.00	FALSE
LC(+57.02)TVATLR	61.02	932.511	8	-3.3	467.261	2	11.8192	392000000	1950000000	2912	20210616_HS_C_50ng_F2-2.raw	104	A0A0C4DGB6|A0A0C4DGB6_HUMAN;A0A087WWT3|A0A087WWT3_HUMAN;P02768|ALBU_HUMAN;H7C013|H7C013_HUMAN	Carbamidomethylation	C2:Carbamidomethylation:1000.00	FALSE
LDAQASFLPK	49.21	1088.59	10	4.4	545.303	2	18.2648	6970000	33200000	4225	20210616_HS_C_50ng_F2-1.raw	6	P19827|ITIH1_HUMAN			FALSE
LDELRDEGK	47.02	1073.54	9	-2.9	537.773	2	4.7302	42400000	123000000	825	20210616_HS_C_50ng_F1-3.raw	51	A0A0C4DGB6|A0A0C4DGB6_HUMAN;P02768|ALBU_HUMAN;D6RHD5|D6RHD5_HUMAN;B7WNR0|B7WNR0_HUMAN;H0YA55|H0YA55_HUMAN			FALSE
LDTLAQEVALLK	48.46	1312.76	12	4.2	657.39	2	24.0353	351000	3340000	5483	20210616_HS_C_50ng_F3-1.raw	3				FALSE
LDVTTSIGR	36.66	960.524	9	-2.4	481.269	2	13.8198	290000	1660000	3002	20210616_HS_C_50ng_F2-3.raw	1	P04114|APOB_HUMAN			FALSE
LEDM(+15.99)EQALSPSVFK	63.02	1608.77	14	2.3	805.394	2	19.7004	8110000	72200000	4113	20210616_HS_C_50ng_F3-1.raw	11	P05155|IC1_HUMAN;E9PGN7|E9PGN7_HUMAN	Oxidation (M)		FALSE
LEIQSQVDSQHVGHSVLTAK	43.23	2175.13	20	3.9	544.792	4	18.1433	239000	3050000	3448	20210616_HS_C_50ng_F1-3.raw	3	P04114|APOB_HUMAN			FALSE
LELHVDGPPPRPQLR	66.26	1722.95	15	-0.4	431.745	4	19.3594	3050000	10000000	3712	20210616_HS_C_50ng_F1-2.raw	6	P04217|A1BG_HUMAN			FALSE
LENEIQTYR	39.12	1164.58	9	4.8	583.299	2	7.6955	1300000	3250000	1642	20210616_HS_C_50ng_F2-1.raw	4	#CONTAM#cont|000133|;#CONTAM#cont|000131|;P13645|K1C10_HUMAN;#CONTAM#cont|000129|;#CONTAM#cont|000136|;#CONTAM#cont|000122|;#CONTAM#cont|000130|			FALSE
LEQGENVFLQATDK	58.55	1590.79	14	3.7	796.405	2	19.0657	1880000	17000000	3928	20210616_HS_C_50ng_F3-1.raw	4				FALSE
LGEHNIDVLEGNEQFIN(+0.98)AAK	54.93	2211.08	20	0	738.034	3	21.7171	128000	1350000	5248	20210616_HS_C_50ng_F2-1.raw	1	#CONTAM#cont|000144|;#CONTAM#cont|000142|;#CONTAM#cont|000023|;#CONTAM#cont|000143|;#CONTAM#cont|000141|;#CONTAM#cont|000040|;#CONTAM#cont|000032|	Deamidation (NQ)	N17:Deamidation (NQ):47.09	FALSE
LGEHNIDVLEGNEQFINAAK	73.44	2210.1	20	3.1	737.708	3	22.1577	9010000	65200000	4914	20210616_HS_C_50ng_F3-1.raw	15	#CONTAM#cont|000144|;#CONTAM#cont|000142|;#CONTAM#cont|000023|;#CONTAM#cont|000143|;#CONTAM#cont|000141|;#CONTAM#cont|000040|;#CONTAM#cont|000032|			FALSE
LGEVNTYAGDLQK	53.73	1406.7	13	3.2	704.362	2	16.4237	773000	8050000	3221	20210616_HS_C_50ng_F3-3.raw	7	P06727|APOA4_HUMAN			FALSE
LGFTDLFSK	39.46	1026.54	9	2.4	514.278	2	23.7964	197000	1280000	5779	20210616_HS_C_50ng_F2-1.raw	1				FALSE
LGM(+15.99)FNIQHC(+57.02)K	60.38	1262.59	10	-2.3	421.87	3	13.5158	739000	1540000	2280	20210616_HS_C_50ng_F1-2.raw	3		Oxidation (M); Carbamidomethylation	C9:Carbamidomethylation:1000.00	FALSE
LGVYELLLK	48.35	1046.64	9	3.8	524.328	2	24.7463	1520000	8010000	5902	20210616_HS_C_50ng_F2-2.raw	3	Q14624|ITIH4_HUMAN;B7ZKJ8|B7ZKJ8_HUMAN;H7C0L5|H7C0L5_HUMAN			FALSE
LGYVTADGETSGSITC(+57.02)GK	62.85	1814.84	18	2.5	908.427	2	16.4606	902000	5680000	3192	20210616_HS_C_50ng_F3-1.raw	5	P08603|CFAH_HUMAN	Carbamidomethylation	C16:Carbamidomethylation:1000.00	FALSE
LIC(+57.02)QATGFSPR	62.58	1248.63	11	2	625.323	2	15.9657	10100000	55300000	3463	20210616_HS_C_50ng_F2-2.raw	11	P01871|IGHM_HUMAN	Carbamidomethylation	C3:Carbamidomethylation:1000.00	FALSE
LISVDTEHSNIYLQN(+0.98)GPDR	49.62	2171.05	19	-4	724.688	3	19.7642	216000	3290000	4144	20210616_HS_C_50ng_F3-1.raw	2	E9PFZ2|E9PFZ2_HUMAN;P00450|CERU_HUMAN	Deamidation (NQ)	N15:Deamidation (NQ):8.69	FALSE
LISVDTEHSNIYLQNGPDR	53.12	2170.07	19	3.6	724.365	3	19.7699	432000	5790000	4629	20210616_HS_C_50ng_F2-2.raw	3	E9PFZ2|E9PFZ2_HUMAN;P00450|CERU_HUMAN			FALSE
LIYAASSLQSGVPSR	58.91	1547.83	15	5.6	774.927	2	18.941	88700	1690000	3894	20210616_HS_C_50ng_F3-1.raw	3				FALSE
LKC(+57.02)DEWSVNSVGK	51.86	1520.73	13	4.2	761.375	2	16.1307	184000	2100000	3521	20210616_HS_C_50ng_F2-2.raw	3	P02787|TRFE_HUMAN	Carbamidomethylation	C3:Carbamidomethylation:1000.00	FALSE
LLDNWDSVTSTFSK	68.21	1611.78	14	2.7	806.898	2	23.1986	23600000	263000000	5041	20210616_HS_C_50ng_F4-1.raw	24	F8W696|F8W696_HUMAN;P02647|APOA1_HUMAN			FALSE
LLDSLPSDTR	47.23	1115.58	10	2.9	558.8	2	15.1473	16300000	95200000	3262	20210616_HS_C_50ng_F2-1.raw	15	H9KV48|H9KV48_HUMAN;P05155|IC1_HUMAN;E9PGN7|E9PGN7_HUMAN			FALSE
LLIYAVLPTGDVIGDSAK	50.38	1844.03	18	3.1	923.025	2	27.1498	361000	2620000	6095	20210616_HS_C_50ng_F4-1.raw	2	P01023|A2MG_HUMAN			FALSE
LLIYDASNLETGVPSR	55.2	1746.92	16	3.5	874.468	2	22.1595	55500	816000	4708	20210616_HS_C_50ng_F4-1.raw	1	A0A2Q2TTZ9|A0A2Q2TTZ9_HUMAN			FALSE
LLIYDASNR	51.51	1063.57	9	2.1	532.792	2	15.6213	6920000	25000000	3366	20210616_HS_C_50ng_F2-2.raw	6				FALSE
LLIYDASSR	38.69	1036.56	9	2.7	519.286	2	15.3632	939000	4460000	3331	20210616_HS_C_50ng_F2-1.raw	7	A0A0C4DH25|KVD20_HUMAN			FALSE
LLIYGASTR	39.88	992.565	9	0.9	497.291	2	15.8761	5840000	34900000	3644	20210616_HS_C_50ng_F2-2.raw	7				FALSE
LLLQQVSLPELPGEYSM(+15.99)K	69.21	2060.09	18	-3.9	687.7	3	26.5259	1950000	15700000	6107	20210616_HS_C_50ng_F4-3.raw	5	P01023|A2MG_HUMAN	Oxidation (M)		FALSE
LLQDEFPGIPSPLDAAVEC(+57.02)HR	60.74	2363.16	21	2.9	788.729	3	26.3569	2060000	11800000	6222	20210616_HS_C_50ng_F2-2.raw	5	P02790|HEMO_HUMAN;Q9BS19|Q9BS19_HUMAN	Carbamidomethylation	C19:Carbamidomethylation:1000.00	FALSE
LLSGGNTLHLVSTTK	62.47	1539.86	15	2.7	514.296	3	18.8766	1300000	10700000	4341	20210616_HS_C_50ng_F2-2.raw	3	P04114|APOB_HUMAN			FALSE
LLVVYPWTQR	38.46	1273.72	10	3.8	637.869	2	24.1423	849000	4550000	5569	20210616_HS_C_50ng_F3-2.raw	5	F8W6P5|F8W6P5_HUMAN;E9PFT6|E9PFT6_HUMAN;P02042|HBD_HUMAN;P68871|HBB_HUMAN;A0A2R8Y7R2|A0A2R8Y7R2_HUMAN;E9PEW8|E9PEW8_HUMAN			FALSE
LM(+15.99)NIFLK	41.61	893.505	7	-1.6	447.76	2	19.5921	5300000	18900000	4601	20210616_HS_C_50ng_F2-3.raw	8	P01024|CO3_HUMAN	Oxidation (M)		FALSE
LM(+15.99)QC(+57.02)LPNPEDVK	51.57	1458.68	12	3.8	730.352	2	17.2034	306000	2720000	3378	20210616_HS_C_50ng_F3-1.raw	3	P04003|C4BPA_HUMAN	Oxidation (M); Carbamidomethylation	C4:Carbamidomethylation:1000.00	FALSE
LN(+0.98)GEIQALELPQK	59.18	1452.78	13	2.3	727.4	2	20.7412	305000	3400000	4345	20210616_HS_C_50ng_F4-2.raw	3	P04114|APOB_HUMAN	Deamidation (NQ)	N2:Deamidation (NQ):16.51	FALSE
LN(+0.98)M(+15.99)GITDLQGLR	50.22	1346.69	12	4.9	674.354	2	19.8187			4165	20210616_HS_C_50ng_F3-1.raw	1	A0A140TA32|A0A140TA32_HUMAN;A0A140TA29|A0A140TA29_HUMAN;P0C0L4|CO4A_HUMAN;P0C0L5|CO4B_HUMAN;A0A0G2JPR0|A0A0G2JPR0_HUMAN;A0A140TA49|A0A140TA49_HUMAN;F5GXS0|F5GXS0_HUMAN;A0A140TA44|A0A140TA44_HUMAN;A0A0G2JL54|A0A0G2JL54_HUMAN	Deamidation (NQ); Oxidation (M)	N2:Deamidation (NQ):83.89;M3:Oxidation (M):1000.00	FALSE
LNDLEDALQQAK	60.64	1356.69	12	-2.8	679.35	2	18.8687	2380000	28300000	3884	20210616_HS_C_50ng_F3-1.raw	7	#CONTAM#cont|000132|;#CONTAM#cont|000135|;#CONTAM#cont|000134|;P04264|K2C1_HUMAN			FALSE
LNGEIQALELPQK	64.38	1451.8	13	3.3	726.909	2	20.3873	291000	4050000	4344	20210616_HS_C_50ng_F3-1.raw	3	P04114|APOB_HUMAN			FALSE
LNM(+15.99)GITDLQGLR	61.99	1345.7	12	4.1	673.861	2	19.3829	4130000	37400000	4514	20210616_HS_C_50ng_F2-2.raw	10	A0A140TA32|A0A140TA32_HUMAN;A0A140TA29|A0A140TA29_HUMAN;P0C0L4|CO4A_HUMAN;P0C0L5|CO4B_HUMAN;A0A0G2JPR0|A0A0G2JPR0_HUMAN;A0A140TA49|A0A140TA49_HUMAN;F5GXS0|F5GXS0_HUMAN;A0A140TA44|A0A140TA44_HUMAN;A0A0G2JL54|A0A0G2JL54_HUMAN	Oxidation (M)		FALSE
LNMGITDLQGLR	42.51	1329.71	12	2.5	665.863	2	22.4882	57900	500000	5081	20210616_HS_C_50ng_F3-3.raw	1	A0A140TA32|A0A140TA32_HUMAN;A0A140TA29|A0A140TA29_HUMAN;P0C0L4|CO4A_HUMAN;P0C0L5|CO4B_HUMAN;A0A0G2JPR0|A0A0G2JPR0_HUMAN;A0A140TA49|A0A140TA49_HUMAN;F5GXS0|F5GXS0_HUMAN;A0A140TA44|A0A140TA44_HUMAN;A0A0G2JL54|A0A0G2JL54_HUMAN			FALSE
LPDATPTELAK	65.2	1154.62	11	4.4	578.319	2	15.4608	7760000	35800000	3327	20210616_HS_C_50ng_F2-2.raw	9	P02774|VTDB_HUMAN;D6RF35|D6RF35_HUMAN			FALSE
LPEC(+57.02)EADDGC(+57.02)PKPPEIAHGYVEHSVR	42.85	2961.34	26	0	741.342	4	18.354	163000	1490000	3481	20210616_HS_C_50ng_F1-2.raw	2	P00738|HPT_HUMAN;J3QLC9|J3QLC9_HUMAN;H0Y300|H0Y300_HUMAN;J3KRH2|J3KRH2_HUMAN;J3QR68|J3QR68_HUMAN	Carbamidomethylation; Carbamidomethylation	C4:Carbamidomethylation:1000.00;C10:Carbamidomethylation:1000.00	FALSE
LPGIVAEGR	48.4	910.524	9	1.2	456.27	2	13.6733	4120000	26100000	2875	20210616_HS_C_50ng_F2-2.raw	9	P01008|ANT3_HUMAN			FALSE
LPLEYSYGEYR	60.72	1388.66	11	0.9	695.338	2	19.5313	371000	4100000	4071	20210616_HS_C_50ng_F3-1.raw	3	F5GY80|F5GY80_HUMAN;P07358|CO8B_HUMAN;F5H7G1|F5H7G1_HUMAN			FALSE
LPPNVVEESAR	60.85	1209.64	11	1.6	605.826	2	12.9508	93400000	367000000	2853	20210616_HS_C_50ng_F2-2.raw	54	P01023|A2MG_HUMAN			FALSE
LPQQANDYLNSFNWER	46.19	1993.93	16	0.5	997.972	2	23.924	128000	1010000	5472	20210616_HS_C_50ng_F3-1.raw	1	P04114|APOB_HUMAN			FALSE
LPTDSELAPR	51.89	1097.57	10	4	549.795	2	13.0006	451000	1310000	2738	20210616_HS_C_50ng_F2-2.raw	3	A0A182DWH7|A0A182DWH7_HUMAN;P49908|SEPP1_HUMAN			FALSE
LPYSVVR	38.41	832.481	7	-0.7	417.248	2	13.4889	7310000	42900000	2858	20210616_HS_C_50ng_F2-3.raw	13	P01024|CO3_HUMAN			FALSE
LQAILGVPWK	44.49	1123.68	10	6.1	562.848	2	24.3459	105000	984000	5829	20210616_HS_C_50ng_F2-2.raw	2	P01019|ANGT_HUMAN			FALSE
LQDFSDQLSDYYEK	55.19	1749.77	14	4.4	875.898	2	20.6657	1230000	11800000	4428	20210616_HS_C_50ng_F3-1.raw	6	P04114|APOB_HUMAN			FALSE
LQGTLPVEAR	56.29	1082.61	10	2.7	542.313	2	14.3902	399000	1380000	3062	20210616_HS_C_50ng_F2-2.raw	1	P01031|CO5_HUMAN			FALSE
LQHLEN(+0.98)ELTHDIITK	56.37	1803.94	15	0.1	451.991	4	19.1881	585000	6480000	3690	20210616_HS_C_50ng_F1-1.raw	5		Deamidation (NQ)	N6:Deamidation (NQ):25.70	FALSE
LQHLENELTHDIITK	74.72	1802.95	15	-1	601.991	3	19.6848	44000000	966000000	3814	20210616_HS_C_50ng_F1-3.raw	31				FALSE
LQPLDFK	36.97	859.48	7	0.4	430.748	2	17.5323	3910000	9110000	4107	20210616_HS_C_50ng_F2-2.raw	4	P01008|ANT3_HUMAN			FALSE
LQSLFDSPDFSK	28.9	1382.67	12	1.3	692.344	2	21.4765	235000	1540000	4747	20210616_HS_C_50ng_F3-1.raw	1	P36955|PEDF_HUMAN			FALSE
LSINTHPSQKPLSITVR	70.04	1890.07	17	0	473.524	4	19.4474	4570000	57000000	3751	20210616_HS_C_50ng_F1-1.raw	7	P01024|CO3_HUMAN			FALSE
LSITGTYDLK	43.38	1109.6	10	0	555.806	2	18.8911	43700000	239000000	4330	20210616_HS_C_50ng_F2-2.raw	10				FALSE
LSLEIEQLELQR	49.2	1469.81	12	-1	735.911	2	23.9317	258000	5450000	5447	20210616_HS_C_50ng_F3-1.raw	3	P04003|C4BPA_HUMAN			FALSE
LSM(+15.99)DIDVSYK	43.66	1185.56	10	3.2	593.788	2	15.6417	492000	2590000	3385	20210616_HS_C_50ng_F2-2.raw	6	P01031|CO5_HUMAN	Oxidation (M)		FALSE
LSNNALSGLPQGVFGK	53.63	1600.86	16	3	801.438	2	22.8676	326000	3210000	5141	20210616_HS_C_50ng_F3-1.raw	3				FALSE
LSNVLQQVK	43.99	1027.6	9	1	514.81	2	15.142	1610000	4720000	3288	20210616_HS_C_50ng_F2-3.raw	4	P04114|APOB_HUMAN			FALSE
LSPIYNLVPVK	47.18	1241.74	11	2	621.878	2	23.5756	2150000	14400000	5342	20210616_HS_C_50ng_F3-1.raw	6	P02748|CO9_HUMAN			FALSE
LSPLGEEM(+15.99)R	40.82	1046.51	9	2.5	524.263	2	7.2722	8520000	19700000	1583	20210616_HS_C_50ng_F2-3.raw	5	F8W696|F8W696_HUMAN;P02647|APOA1_HUMAN	Oxidation (M)		FALSE
LSSPATLN(+0.98)SR	41.23	1045.54	10	-1	523.777	2	6.2419	2850000	11200000	1196	20210616_HS_C_50ng_F3-1.raw	8	#CONTAM#cont|000142|;#CONTAM#cont|000023|;#CONTAM#cont|000143|;#CONTAM#cont|000141|;#CONTAM#cont|000040|;#CONTAM#cont|000032|	Deamidation (NQ)		FALSE
LSSPATLNSR	49.67	1044.56	10	5.7	523.288	2	6.994	10300000	22000000	1472	20210616_HS_C_50ng_F2-2.raw	21	#CONTAM#cont|000142|;#CONTAM#cont|000023|;#CONTAM#cont|000143|;#CONTAM#cont|000141|;#CONTAM#cont|000040|;#CONTAM#cont|000032|			FALSE
LSSPAVITDK	51.18	1029.57	10	1.8	515.793	2	12.0601	3780000	8100000	2466	20210616_HS_C_50ng_F2-2.raw	6	P00747|PLMN_HUMAN			FALSE
LSSVTAADTAVYYC(+57.02)AR	63.79	1746.82	16	3.2	874.422	2	18.7196	438000	4730000	3822	20210616_HS_C_50ng_F3-1.raw	5		Carbamidomethylation	C14:Carbamidomethylation:1000.00	FALSE
LSYTC(+57.02)EGGFR	44.5	1188.52	10	1.1	595.27	2	14.697	1330000	5690000	3141	20210616_HS_C_50ng_F2-2.raw	5	P08603|CFAH_HUMAN	Carbamidomethylation	C5:Carbamidomethylation:1000.00	FALSE
LTISEQNIQR	49.27	1200.65	10	3.6	601.333	2	14.4166	5480000	40900000	3059	20210616_HS_C_50ng_F2-2.raw	13	A8MUN2|A8MUN2_HUMAN;P04114|APOB_HUMAN			FALSE
LTLDIQNK	40.64	943.534	8	1.7	472.775	2	15.2115	1370000	5660000	3264	20210616_HS_C_50ng_F2-2.raw	3	P04114|APOB_HUMAN			FALSE
LTPLYELVK	43.44	1074.63	9	5.1	538.326	2	22.7283	334000	2090000	5450	20210616_HS_C_50ng_F2-2.raw	3	P10643|CO7_HUMAN			FALSE
LVAASQAALGL	55.09	1012.59	11	-3.7	507.301	2	20.1041	419000000	3540000000	4269	20210616_HS_C_50ng_F4-2.raw	79	A0A087WWT3|A0A087WWT3_HUMAN;P02768|ALBU_HUMAN;C9JKR2|C9JKR2_HUMAN;D6RHD5|D6RHD5_HUMAN;B7WNR0|B7WNR0_HUMAN;H0YA55|H0YA55_HUMAN			FALSE
LVAASQAALGL(+21.98)	42.53	1034.57	11	0.7	518.294	2	19.9497	89500000	887000000	4009	20210616_HS_C_50ng_F4-1.raw	17	A0A087WWT3|A0A087WWT3_HUMAN;P02768|ALBU_HUMAN;C9JKR2|C9JKR2_HUMAN;D6RHD5|D6RHD5_HUMAN;B7WNR0|B7WNR0_HUMAN;H0YA55|H0YA55_HUMAN	Sodium adduct		FALSE
LVAYYTLIGASGQR	40.13	1510.81	14	6.6	756.419	2	22.2753	30300	445000	5411	20210616_HS_C_50ng_F2-1.raw	1	P01024|CO3_HUMAN			FALSE
LVDKFLEDVK	54.72	1204.67	10	3.4	603.345	2	19.1423	602000	4850000	3677	20210616_HS_C_50ng_F1-2.raw	3				FALSE
LVGFIDDAVK	43.21	1075.59	10	2.4	538.805	2	20.0905	156000	1510000	4745	20210616_HS_C_50ng_F2-3.raw	1	P04114|APOB_HUMAN			FALSE
LVHVEEPHTETVR	69.87	1544.79	13	-1.4	515.938	3	12.517	6020000	24400000	2217	20210616_HS_C_50ng_F1-3.raw	11	P01023|A2MG_HUMAN			FALSE
LVN(+0.98)EVTEFAK	59.02	1149.59	10	2.5	575.805	2	16.6239	50100000	331000000	3675	20210616_HS_C_50ng_F2-2.raw	13	A0A0C4DGB6|A0A0C4DGB6_HUMAN;A0A087WWT3|A0A087WWT3_HUMAN;P02768|ALBU_HUMAN;H7C013|H7C013_HUMAN	Deamidation (NQ)		FALSE
LVNELTEFAK	51.03	1162.62	10	3	582.321	2	17.7743	3450000	9480000	4022	20210616_HS_C_50ng_F2-2.raw	8	#CONTAM#cont|000097|;#CONTAM#cont|000035|;#CONTAM#cont|000017|			FALSE
LVNEVTE(+21.98)FAK	58.54	1170.59	10	-0.4	586.302	2	17.1813	86800000	717000000	4026	20210616_HS_C_50ng_F2-2.raw	20	A0A0C4DGB6|A0A0C4DGB6_HUMAN;A0A087WWT3|A0A087WWT3_HUMAN;P02768|ALBU_HUMAN;H7C013|H7C013_HUMAN	Sodium adduct	E7:Sodium adduct:29.32	FALSE
LVNEVTEFAK	68.97	1148.61	10	-4	575.309	2	17.1986	846000000	4620000000	4019	20210616_HS_C_50ng_F2-2.raw	205	A0A0C4DGB6|A0A0C4DGB6_HUMAN;A0A087WWT3|A0A087WWT3_HUMAN;P02768|ALBU_HUMAN;H7C013|H7C013_HUMAN			FALSE
LVPFATELHER	53.7	1310.7	11	1	437.907	3	19.6565	19400	423000	3809	20210616_HS_C_50ng_F1-3.raw	3	P06727|APOA4_HUMAN			FALSE
LVRPEVD(+21.98)VM(+15.99)C(+57.02)TAFHDNEETFLK	46.11	2687.23	22	4	672.818	4	22.3842	100000	1110000	5474	20210616_HS_C_50ng_F2-1.raw	1	A0A0C4DGB6|A0A0C4DGB6_HUMAN;A0A087WWT3|A0A087WWT3_HUMAN;P02768|ALBU_HUMAN;H7C013|H7C013_HUMAN	Sodium adduct; Oxidation (M); Carbamidomethylation	D7:Sodium adduct:10.34;M9:Oxidation (M):1000.00;C10:Carbamidomethylation:1000.00	FALSE
LVRPEVDVM(+15.99)C(+57.02)TAFHD(+21.98)NEETFLK	48.3	2687.23	22	4.9	672.819	4	22.462			5390	20210616_HS_C_50ng_F2-2.raw	1	A0A0C4DGB6|A0A0C4DGB6_HUMAN;A0A087WWT3|A0A087WWT3_HUMAN;P02768|ALBU_HUMAN;H7C013|H7C013_HUMAN	Oxidation (M); Carbamidomethylation; Sodium adduct	M9:Oxidation (M):1000.00;C10:Carbamidomethylation:1000.00;D15:Sodium adduct:0.00	FALSE
LVRPEVDVM(+15.99)C(+57.02)TAFHDN(+0.98)EETFLK	32.97	2666.24	22	4.2	667.569	4	23.5554	727000	1200000	4795	20210616_HS_C_50ng_F1-2.raw	2	A0A0C4DGB6|A0A0C4DGB6_HUMAN;A0A087WWT3|A0A087WWT3_HUMAN;P02768|ALBU_HUMAN;H7C013|H7C013_HUMAN	Oxidation (M); Carbamidomethylation; Deamidation (NQ)	C10:Carbamidomethylation:1000.00	FALSE
LVRPEVDVM(+15.99)C(+57.02)TAFHDN(+0.98)EETFLKK	48.93	2794.33	23	6.5	559.877	5	21.3732	6670000	127000000	4512	20210616_HS_C_50ng_F1-2.raw	8	A0A0C4DGB6|A0A0C4DGB6_HUMAN;A0A087WWT3|A0A087WWT3_HUMAN;P02768|ALBU_HUMAN;H7C013|H7C013_HUMAN	Oxidation (M); Carbamidomethylation; Deamidation (NQ)	C10:Carbamidomethylation:1000.00	FALSE
LVRPEVDVM(+15.99)C(+57.02)TAFHDNEETFLK	96.2	2665.25	22	-4.6	667.317	4	22.4227	56800000	721000000	5361	20210616_HS_C_50ng_F2-2.raw	55	A0A0C4DGB6|A0A0C4DGB6_HUMAN;A0A087WWT3|A0A087WWT3_HUMAN;P02768|ALBU_HUMAN;H7C013|H7C013_HUMAN	Oxidation (M); Carbamidomethylation	C10:Carbamidomethylation:1000.00	FALSE
LVRPEVDVM(+15.99)C(+57.02)TAFHDNEETFLKK	96.3	2793.35	23	-8	699.338	4	21.3732	28700000	305000000	4207	20210616_HS_C_50ng_F1-2.raw	34	A0A0C4DGB6|A0A0C4DGB6_HUMAN;A0A087WWT3|A0A087WWT3_HUMAN;P02768|ALBU_HUMAN;H7C013|H7C013_HUMAN	Oxidation (M); Carbamidomethylation	C10:Carbamidomethylation:1000.00	FALSE
LYGSEAFATDFQDSAAAK	65.69	1890.86	18	2.7	946.442	2	20.8893	3090000	37500000	4437	20210616_HS_C_50ng_F4-3.raw	7	G3V595|G3V595_HUMAN;P01011|AACT_HUMAN			FALSE
LYHSEAFTVN(+0.98)FGDTEEAK	36.09	2057.92	18	3	686.983	3	20.5408	30500	428000	4901	20210616_HS_C_50ng_F2-1.raw	1		Deamidation (NQ)		FALSE
LYHSEAFTVNFGDTEEAK	71.05	2056.94	18	3.4	686.655	3	21.0364	2890000	20900000	5041	20210616_HS_C_50ng_F2-2.raw	4				FALSE
LYHSEAFTVNFGDTEEAKK	74.02	2185.03	19	4.3	547.268	4	20.2764	1320000	7800000	3968	20210616_HS_C_50ng_F1-1.raw	3				FALSE
M(+15.99)C(+57.02)PQLQQYEM(+15.99)HGPEGLR	50.68	2104.91	17	1.2	702.646	3	17.6523	4680000	27400000	3993	20210616_HS_C_50ng_F2-1.raw	3	P01023|A2MG_HUMAN	Oxidation (M); Carbamidomethylation; Oxidation (M)	C2:Carbamidomethylation:1000.00	FALSE
M(+15.99)EEVEAM(+15.99)LLPETLK	65.87	1663.8	14	4.2	832.913	2	21.5604	7870000	62600000	4714	20210616_HS_C_50ng_F3-1.raw	8	G3V595|G3V595_HUMAN;G3V3A0|G3V3A0_HUMAN;A0A087WY93|A0A087WY93_HUMAN;P01011|AACT_HUMAN	Oxidation (M); Oxidation (M)		FALSE
M(+15.99)EEVEAM(+15.99)LLPETLKR	46.43	1819.91	15	4.3	607.645	3	20.5151	417000	4080000	4887	20210616_HS_C_50ng_F2-1.raw	3	G3V595|G3V595_HUMAN;G3V3A0|G3V3A0_HUMAN;A0A087WY93|A0A087WY93_HUMAN;P01011|AACT_HUMAN	Oxidation (M); Oxidation (M)		FALSE
M(+15.99)FLSFPTTK	53.52	1086.54	9	3.7	544.28	2	20.5636	2220000	11200000	4855	20210616_HS_C_50ng_F2-2.raw	3	P69905|HBA_HUMAN;G3V1N2|G3V1N2_HUMAN;A0A2R8Y7C0|A0A2R8Y7C0_HUMAN	Oxidation (M)		FALSE
M(+15.99)FTTAPDQVDKEDEDFQESNK	52.35	2489.05	21	3.5	830.695	3	16.8802	5550000	32500000	3348	20210616_HS_C_50ng_F3-3.raw	5	E9PFZ2|E9PFZ2_HUMAN;H7C5R1|H7C5R1_HUMAN;P00450|CERU_HUMAN	Oxidation (M)		FALSE
M(+15.99)LADAPPQDPSC(+57.02)C(+57.02)SGALYYGSK	56.13	2403.02	22	-1.7	802.012	3	18.3795	238000	2850000	3613	20210616_HS_C_50ng_F4-2.raw	3	Q5T985|Q5T985_HUMAN;P19823|ITIH2_HUMAN	Oxidation (M); Carbamidomethylation; Carbamidomethylation	C12:Carbamidomethylation:1000.00;C13:Carbamidomethylation:1000.00	FALSE
M(+15.99)NTVIAALSR	55.15	1090.58	10	2.2	546.299	2	16.8867	646000	3550000	3741	20210616_HS_C_50ng_F2-2.raw	3	P08185|CBG_HUMAN	Oxidation (M)		FALSE
M(+15.99)PGTVATLR	48.12	960.506	9	0.3	481.261	2	19.0554	20500000	203000000	3900	20210616_HS_C_50ng_F4-1.raw	22		Oxidation (M)		FALSE
M(+15.99)RPSTDTITVM(+15.99)VENSHGLR	58.36	2175.04	19	2.1	726.023	3	17.6765	1400000	11500000	3313	20210616_HS_C_50ng_F1-3.raw	7	A0A140TA32|A0A140TA32_HUMAN;A0A140TA29|A0A140TA29_HUMAN;P0C0L4|CO4A_HUMAN;P0C0L5|CO4B_HUMAN;A0A0G2JPR0|A0A0G2JPR0_HUMAN;A0A140TA49|A0A140TA49_HUMAN;F5GXS0|F5GXS0_HUMAN;A0A140TA44|A0A140TA44_HUMAN;A0A0G2JL54|A0A0G2JL54_HUMAN	Oxidation (M); Oxidation (M)		FALSE
M(+15.99)SAVEGIC(+57.02)TSESPVIDHQGTK	48.4	2261.03	21	3.1	754.686	3	17.1675	122000	2730000	3868	20210616_HS_C_50ng_F2-1.raw	4	P01031|CO5_HUMAN	Oxidation (M); Carbamidomethylation	C8:Carbamidomethylation:1000.00	FALSE
M(+15.99)TSNFPVDLSDYPK	55.29	1628.74	14	3.5	815.38	2	21.1947	3150000	26700000	4590	20210616_HS_C_50ng_F3-1.raw	4	P04114|APOB_HUMAN	Oxidation (M)		FALSE
M(+15.99)VSGFIPLKPTVK	53.47	1431.82	13	4.4	478.281	3	20.5193	5090000	24500000	4834	20210616_HS_C_50ng_F2-2.raw	5	P01023|A2MG_HUMAN;P20742|PZP_HUMAN	Oxidation (M)		FALSE
M(+15.99)YLGYEYVTAIR	67.11	1493.72	12	4	747.871	2	21.9652	32300000	132000000	5248	20210616_HS_C_50ng_F2-2.raw	24	P02787|TRFE_HUMAN	Oxidation (M)		FALSE
M(+15.99)YQM(+15.99)DIQQELQR	49.8	1613.72	12	1.9	807.868	2	16.3519	1170000	4770000	3163	20210616_HS_C_50ng_F3-1.raw	5	P04114|APOB_HUMAN	Oxidation (M); Oxidation (M)		FALSE
MEEVEAM(+15.99)LLPETLK	54.7	1647.81	14	4.7	824.916	2	22.6221	275000	3420000	5109	20210616_HS_C_50ng_F3-3.raw	3	G3V595|G3V595_HUMAN;G3V3A0|G3V3A0_HUMAN;A0A087WY93|A0A087WY93_HUMAN;P01011|AACT_HUMAN	Oxidation (M)	M7:Oxidation (M):53.33	FALSE
MPGTVATLR	37.09	944.511	9	-0.9	473.262	2	19.4435	11100000	14700000	4880	20210616_HS_C_50ng_F2-2.raw	13				FALSE
MYLGYEYVTAIR	50.65	1477.73	12	3.9	739.874	2	23.4833	310000	2060000	5318	20210616_HS_C_50ng_F3-1.raw	2	P02787|TRFE_HUMAN			FALSE
N(+0.98)EDSLVFVQTDK	64.27	1394.66	12	6.5	698.34	2	18.506	347000	4860000	3598	20210616_HS_C_50ng_F4-1.raw	5	P01023|A2MG_HUMAN;F8W7L3|F8W7L3_HUMAN	Deamidation (NQ)	N1:Deamidation (NQ):131.72	FALSE
N(+0.98)GFYPATR	45.47	925.429	8	-2.3	463.721	2	8.0997	202000	454000	1449	20210616_HS_C_50ng_F4-3.raw	2	A0A0D9SG88|A0A0D9SG88_HUMAN;P08603|CFAH_HUMAN;Q5TFM2|Q5TFM2_HUMAN	Deamidation (NQ)		FALSE
N(+0.98)GIDIYSLTVDSR	57.6	1452.71	13	2.2	727.364	2	22.6227	478000	4240000	4964	20210616_HS_C_50ng_F4-2.raw	3	Q14624|ITIH4_HUMAN;B7ZKJ8|B7ZKJ8_HUMAN	Deamidation (NQ)		FALSE
N(+0.98)GVAQEPVHLDSPAIK	59.48	1674.86	16	2.7	838.438	2	18.5922	7450000	91100000	3777	20210616_HS_C_50ng_F3-1.raw	10	P04217|A1BG_HUMAN;M0R009|M0R009_HUMAN	Deamidation (NQ)	N1:Deamidation (NQ):11.12	FALSE
N(+0.98)QVSLTC(+57.02)LVK	49.26	1161.61	10	4.8	581.813	2	20.8126			4278	20210616_HS_C_50ng_F4-1.raw	5	P01859|IGHG2_HUMAN;P01857|IGHG1_HUMAN;A0A286YEY4|A0A286YEY4_HUMAN;A0A0A0MS08|A0A0A0MS08_HUMAN;A0A0A0MS07|A0A0A0MS07_HUMAN	Deamidation (NQ); Carbamidomethylation	N1:Deamidation (NQ):0.00;C7:Carbamidomethylation:1000.00	FALSE
N(+0.98)SLYLQM(+15.99)NSLR	49.13	1354.66	11	0.9	678.335	2	17.5793	418000	3130000	3467	20210616_HS_C_50ng_F4-3.raw	4		Deamidation (NQ); Oxidation (M)	N1:Deamidation (NQ):46.87;M7:Oxidation (M):1000.00	FALSE
NDFTWFK	32.13	956.439	7	3.4	479.23	2	21.1925	126000	635000	5041	20210616_HS_C_50ng_F2-3.raw	1	P08603|CFAH_HUMAN			FALSE
NEC(+57.02)FLQHK	35.96	1074.49	8	-2.1	538.252	2	6.0147	3410000	3020000	1061	20210616_HS_C_50ng_F1-3.raw	4	A0A0C4DGB6|A0A0C4DGB6_HUMAN;A0A087WWT3|A0A087WWT3_HUMAN;P02768|ALBU_HUMAN;H7C013|H7C013_HUMAN	Carbamidomethylation	C3:Carbamidomethylation:1000.00	FALSE
NEC(+57.02)FLQHKDDNPNLPR	61.05	1995.92	16	-0.8	666.314	3	16.3741	5870000	30900000	2974	20210616_HS_C_50ng_F1-3.raw	7	A0A0C4DGB6|A0A0C4DGB6_HUMAN;A0A087WWT3|A0A087WWT3_HUMAN;P02768|ALBU_HUMAN;H7C013|H7C013_HUMAN	Carbamidomethylation	C3:Carbamidomethylation:1000.00	FALSE
NEDSLVFVQTDK	62.82	1393.67	12	3	697.846	2	18.1986	16900000	96400000	3665	20210616_HS_C_50ng_F3-1.raw	14	P01023|A2MG_HUMAN;F8W7L3|F8W7L3_HUMAN			FALSE
NFPPSQDASGDLYTTSSQLTLPATQC(+57.02)LAGK	54.38	3167.51	30	4.8	1056.85	3	24.7019	1820000	2300000	5668	20210616_HS_C_50ng_F4-2.raw	1	P01876|IGHA1_HUMAN;A0A286YEY1|A0A286YEY1_HUMAN	Carbamidomethylation	C26:Carbamidomethylation:1000.00	FALSE
NFPSPVDAAFR	62.4	1219.6	11	2.4	610.808	2	21.3707	37800000	443000000	5095	20210616_HS_C_50ng_F2-2.raw	34	P02790|HEMO_HUMAN;Q9BS19|Q9BS19_HUMAN			FALSE
NGIDIYSLTVDSR	41.85	1451.73	13	0.6	726.87	2	22.2072	21900	321000	5002	20210616_HS_C_50ng_F3-2.raw	1	Q14624|ITIH4_HUMAN;B7ZKJ8|B7ZKJ8_HUMAN			FALSE
NGVAQEPVHLDSPAIK	67.57	1673.87	16	3.4	558.967	3	18.0703	1110000	10200000	4105	20210616_HS_C_50ng_F2-2.raw	3	P04217|A1BG_HUMAN;M0R009|M0R009_HUMAN			FALSE
NIILPVYDK	54.54	1073.61	9	4.4	537.816	2	20.2729	2490000	18600000	4818	20210616_HS_C_50ng_F2-1.raw	9	P04114|APOB_HUMAN			FALSE
NILTSN(+0.98)NIDVK	42.41	1230.65	11	2.4	616.332	2	17.152	112000	1030000	3440	20210616_HS_C_50ng_F3-3.raw	1	P05090|APOD_HUMAN;C9JF17|C9JF17_HUMAN	Deamidation (NQ)	N6:Deamidation (NQ):12.28	FALSE
NILTSNNIDVK	49.92	1229.66	11	1.2	615.839	2	17.2574	5020000	23500000	3859	20210616_HS_C_50ng_F2-2.raw	10	P05090|APOD_HUMAN;C9JF17|C9JF17_HUMAN			FALSE
NLAVSQVVHK	50.96	1093.62	10	0.8	547.82	2	11.2427	2550000	3820000	1998	20210616_HS_C_50ng_F1-3.raw	7	G3V3A0|G3V3A0_HUMAN;P01011|AACT_HUMAN			FALSE
NLDLDSIIAEVK	55.93	1328.72	12	1.3	665.367	2	26.18	259000	2170000	5974	20210616_HS_C_50ng_F3-1.raw	3	P35908|K22E_HUMAN			FALSE
NLQNNAEWVYQGAIR	57.73	1774.88	15	3.7	888.448	2	21.3818	128000	2390000	4670	20210616_HS_C_50ng_F3-1.raw	3	P04114|APOB_HUMAN			FALSE
NNALDFVTK	56.93	1020.52	9	1.6	511.27	2	16.867	1270000	6810000	3735	20210616_HS_C_50ng_F2-2.raw	4	P04114|APOB_HUMAN			FALSE
NNEGTYYSPNYNPQSR	45.99	1902.81	16	1.6	952.415	2	13.887	1330000	3150000	2614	20210616_HS_C_50ng_F3-3.raw	3	E9PFZ2|E9PFZ2_HUMAN;H7C5R1|H7C5R1_HUMAN;P00450|CERU_HUMAN			FALSE
NNLELSTPLK	42.38	1127.62	10	4.1	564.819	2	17.6353	341000	3040000	4058	20210616_HS_C_50ng_F2-1.raw	3				FALSE
NPDGDVGGPWC(+57.02)YTTNPR	50.6	1904.81	17	0.4	953.413	2	18.9137	153000	1740000	3940	20210616_HS_C_50ng_F3-2.raw	3	P00747|PLMN_HUMAN	Carbamidomethylation	C11:Carbamidomethylation:1000.00	FALSE
NPDSSTTGPWC(+57.02)YTTDPTVR	48.38	2153.93	19	3.3	1077.98	2	19.6214	337000	2890000	3996	20210616_HS_C_50ng_F4-2.raw	3	C9JV37|C9JV37_HUMAN;P00734|THRB_HUMAN;E9PIT3|E9PIT3_HUMAN	Carbamidomethylation	C11:Carbamidomethylation:1000.00	FALSE
NPLVWVHASPEHVVVTR	60.8	1939.04	17	1	485.769	4	21.4732	364000	3780000	4253	20210616_HS_C_50ng_F1-2.raw	7	Q14624|ITIH4_HUMAN;B7ZKJ8|B7ZKJ8_HUMAN;H7C0L5|H7C0L5_HUMAN			FALSE
NPN(+0.98)GYSFSIPVK	53.84	1322.65	12	3.4	662.335	2	20.7209	1270000	8380000	4444	20210616_HS_C_50ng_F3-1.raw	3	P04114|APOB_HUMAN	Deamidation (NQ)	N3:Deamidation (NQ):39.76	FALSE
NPNGYSFSIPVK	33.01	1321.67	12	8.7	661.846	2	20.0161	784000	1300000	4475	20210616_HS_C_50ng_F3-2.raw	3	P04114|APOB_HUMAN			FALSE
NPNLPPETVDSLK	50.61	1422.74	13	-8.7	712.369	2	18.0317	2180000	10400000	3656	20210616_HS_C_50ng_F3-1.raw	4	P05090|APOD_HUMAN;C9JF17|C9JF17_HUMAN			FALSE
NQ(+0.98)VSLTC(+57.02)LVK	47.46	1161.61	10	0.7	581.811	2	19.903	5870000	47400000	4281	20210616_HS_C_50ng_F4-3.raw	5	P01859|IGHG2_HUMAN;P01857|IGHG1_HUMAN;A0A286YEY4|A0A286YEY4_HUMAN;A0A0A0MS08|A0A0A0MS08_HUMAN;A0A0A0MS07|A0A0A0MS07_HUMAN	Deamidation (NQ); Carbamidomethylation	Q2:Deamidation (NQ):0.00;C7:Carbamidomethylation:1000.00	FALSE
NQGNTWLTAFVLK	50.44	1490.79	13	3.5	746.404	2	27.1391	161000	1270000	6156	20210616_HS_C_50ng_F3-1.raw	2	P01023|A2MG_HUMAN;P20742|PZP_HUMAN			FALSE
NQVSLTC(+57.02)LVK	63.7	1160.62	10	2.1	581.32	2	19.0957	79500000	553000000	4439	20210616_HS_C_50ng_F2-2.raw	52	P01859|IGHG2_HUMAN;P01857|IGHG1_HUMAN;A0A286YEY4|A0A286YEY4_HUMAN;A0A0A0MS08|A0A0A0MS08_HUMAN;A0A0A0MS07|A0A0A0MS07_HUMAN	Carbamidomethylation	C7:Carbamidomethylation:1000.00	FALSE
NSLYLQM(+15.99)N(+0.98)SLR	43.01	1354.66	11	2.7	678.337	2	16.9123	638000	6750000	3345	20210616_HS_C_50ng_F3-2.raw	5		Oxidation (M); Deamidation (NQ)	M7:Oxidation (M):1000.00;N8:Deamidation (NQ):0.00	FALSE
NSLYLQM(+15.99)NSLR	48.06	1353.67	11	2.3	677.844	2	16.9678	2300000	14000000	3752	20210616_HS_C_50ng_F2-2.raw	7		Oxidation (M)		FALSE
NTEILTGSWSDQTYPEGTQAIYK	33.73	2601.22	23	5.9	868.087	3	23.0147	194000	2310000	5103	20210616_HS_C_50ng_F4-2.raw	3	A0A0D9SG88|A0A0D9SG88_HUMAN;P08603|CFAH_HUMAN;Q5TFM2|Q5TFM2_HUMAN			FALSE
NTLELSN(+0.98)GVIVK	50.96	1286.71	12	5.6	644.365	2	19.5693	720000	10500000	4086	20210616_HS_C_50ng_F3-1.raw	3	P04114|APOB_HUMAN	Deamidation (NQ)	N7:Deamidation (NQ):72.73	FALSE
NTLELSNGVIVK	40.63	1285.72	12	1.4	643.87	2	19.1792	78300	1000000	4490	20210616_HS_C_50ng_F2-1.raw	1	P04114|APOB_HUMAN			FALSE
NTLYLQ(+0.98)M(+15.99)NSLR	39.94	1368.67	11	6.8	685.347	2	17.3116	352000	2050000	3408	20210616_HS_C_50ng_F3-1.raw	1		Deamidation (NQ); Oxidation (M)	Q6:Deamidation (NQ):13.45;M7:Oxidation (M):1000.00	FALSE
NTLYLQM(+15.99)N(+0.98)SLR	43.33	1368.67	11	4.6	685.346	2	17.253	1180000	10500000	3431	20210616_HS_C_50ng_F3-2.raw	5		Oxidation (M); Deamidation (NQ)	M7:Oxidation (M):1000.00;N8:Deamidation (NQ):32.28	FALSE
NTLYLQM(+15.99)NSLR	45.24	1367.69	11	3.4	684.853	2	17.3121	2130000	17300000	3475	20210616_HS_C_50ng_F3-3.raw	5		Oxidation (M)		FALSE
NVPLPVIAELPPK	54.04	1385.83	13	-1.1	693.921	2	24.6785	8510000	32400000	5600	20210616_HS_C_50ng_F3-1.raw	9	P01871|IGHM_HUMAN			FALSE
NVQDAIADAEQR	50.4	1328.63	12	1.2	665.324	2	14.2163	497000	2680000	2694	20210616_HS_C_50ng_F3-3.raw	4	P35908|K22E_HUMAN			FALSE
NVVFVIDK	44.87	932.533	8	6.4	467.277	2	18.3474	39600	1250000	4226	20210616_HS_C_50ng_F2-1.raw	1	Q14624|ITIH4_HUMAN;B7ZKJ8|B7ZKJ8_HUMAN;H7C0L5|H7C0L5_HUMAN			FALSE
NWGLSVYADKPETTK	53.01	1707.85	15	3.6	854.934	2	19.5423	666000	12100000	4615	20210616_HS_C_50ng_F2-1.raw	5	P02763|A1AG1_HUMAN			FALSE
NYNLVESLK	48.98	1078.57	9	5	540.293	2	18.5399	1370000	6730000	4227	20210616_HS_C_50ng_F2-2.raw	3	P05546|HEP2_HUMAN			FALSE
Q(+0.98)EPSQGTTTFAVTSILR	45.8	1835.93	17	-6.6	918.965	2	24.3828	26200	430000	5589	20210616_HS_C_50ng_F4-3.raw	1	P01876|IGHA1_HUMAN;A0A286YEY1|A0A286YEY1_HUMAN	Deamidation (NQ)	Q1:Deamidation (NQ):0.00	FALSE
Q(+0.98)NC(+57.02)ELFEQLGEYK	56.32	1657.73	13	1.4	829.873	2	22.4988	202000	2060000	4929	20210616_HS_C_50ng_F4-2.raw	5	A0A0C4DGB6|A0A0C4DGB6_HUMAN;A0A087WWT3|A0A087WWT3_HUMAN;P02768|ALBU_HUMAN;C9JKR2|C9JKR2_HUMAN;D6RHD5|D6RHD5_HUMAN;B7WNR0|B7WNR0_HUMAN;H0YA55|H0YA55_HUMAN	Deamidation (NQ); Carbamidomethylation	Q1:Deamidation (NQ):0.00;C3:Carbamidomethylation:1000.00	FALSE
Q(-17.03)APGQELGWM(+15.99)GR	37.27	1327.6	12	-0.1	664.806	2	18.1821	1710000	7970000	3541	20210616_HS_C_50ng_F4-2.raw	3		Pyro-glu from Q; Oxidation (M)		FALSE
Q(-17.03)AVDTAVDGVFIR	60.33	1372.7	13	0.8	687.357	2	22.4341	3350000	36200000	4791	20210616_HS_C_50ng_F4-1.raw	11	P19827|ITIH1_HUMAN;F8WAS2|F8WAS2_HUMAN	Pyro-glu from Q		FALSE
Q(-17.03)DPPSVVVTSHQAPGEK	62.71	1757.86	17	1.3	879.938	2	16.2296	2820000	16000000	3074	20210616_HS_C_50ng_F4-2.raw	10	P25311|ZA2G_HUMAN	Pyro-glu from Q		FALSE
Q(-17.03)E(+21.98)PSQGTTTFAVTSILR	55.49	1839.9	17	-1.5	614.306	3	24.5871	2140000	14800000	5831	20210616_HS_C_50ng_F5-2.raw	6	P01876|IGHA1_HUMAN;A0A286YEY1|A0A286YEY1_HUMAN	Pyro-glu from Q; Sodium adduct	Q1:Pyro-glu from Q:1000.00;E2:Sodium adduct:69.91	FALSE
Q(-17.03)EDDLANINQWVK	67.25	1554.73	13	9.2	778.38	2	23.8105	490000	4370000	5331	20210616_HS_C_50ng_F4-2.raw	6		Pyro-glu from Q		FALSE
Q(-17.03)EELC(+57.02)LAR	45.58	1000.46	8	2.8	501.241	2	15.975	301000	1020000	3090	20210616_HS_C_50ng_F4-3.raw	2	Q5VY30|Q5VY30_HUMAN;P02753|RET4_HUMAN	Pyro-glu from Q; Carbamidomethylation	C5:Carbamidomethylation:1000.00	FALSE
Q(-17.03)ELSE(+21.98)AEQATR	41.99	1265.55	11	0	633.782	2	11.0943	855000	1260000	2114	20210616_HS_C_50ng_F4-3.raw	1	P01024|CO3_HUMAN	Pyro-glu from Q; Sodium adduct	Q1:Pyro-glu from Q:1000.00;E5:Sodium adduct:8.22	FALSE
Q(-17.03)ELSEAEQATR	57.93	1243.57	11	-0.1	622.791	2	11.1077	5370000	11900000	2081	20210616_HS_C_50ng_F4-3.raw	18	P01024|CO3_HUMAN	Pyro-glu from Q		FALSE
Q(-17.03)EPERN(+0.98)EC(+57.02)FLQHK	57.27	1697.75	13	5.6	566.926	3	14.2399	2710000	7180000	3072	20210616_HS_C_50ng_F2-1.raw	9	A0A0C4DGB6|A0A0C4DGB6_HUMAN;A0A087WWT3|A0A087WWT3_HUMAN;P02768|ALBU_HUMAN;H7C013|H7C013_HUMAN	Pyro-glu from Q; Deamidation (NQ); Carbamidomethylation	Q1:Pyro-glu from Q:1000.00;N6:Deamidation (NQ):98.37;C8:Carbamidomethylation:1000.00	FALSE
Q(-17.03)EPERNEC(+57.02)FLQHK	66.7	1696.76	13	-2.9	566.593	3	13.2811	86800000	457000000	2899	20210616_HS_C_50ng_F2-2.raw	41	A0A0C4DGB6|A0A0C4DGB6_HUMAN;A0A087WWT3|A0A087WWT3_HUMAN;P02768|ALBU_HUMAN;H7C013|H7C013_HUMAN	Pyro-glu from Q; Carbamidomethylation	C8:Carbamidomethylation:1000.00	FALSE
Q(-17.03)EPERNEC(+57.02)FLQHKDDNPNLPR	104.84	2618.19	21	-7.9	655.55	4	17.7078	12400000	103000000	3332	20210616_HS_C_50ng_F1-1.raw	19	A0A0C4DGB6|A0A0C4DGB6_HUMAN;A0A087WWT3|A0A087WWT3_HUMAN;P02768|ALBU_HUMAN;H7C013|H7C013_HUMAN	Pyro-glu from Q; Carbamidomethylation	C8:Carbamidomethylation:1000.00	FALSE
Q(-17.03)EPSQGTTTFAVTSILR	78.01	1817.92	17	1.9	909.967	2	24.5074	29400000	402000000	5583	20210616_HS_C_50ng_F4-3.raw	23	P01876|IGHA1_HUMAN;A0A286YEY1|A0A286YEY1_HUMAN	Pyro-glu from Q		FALSE
Q(-17.03)EPSQGTTTYAVTSILR	43.12	1833.91	17	-3.6	917.959	2	23.5756	16100000	18100000	5491	20210616_HS_C_50ng_F4-1.raw	3		Pyro-glu from Q		FALSE
Q(-17.03)EYEQLIAK	59.82	1103.55	9	2.2	552.783	2	18.3624	542000	5610000	3606	20210616_HS_C_50ng_F4-2.raw	5	K7EQQ3|K7EQQ3_HUMAN;P35527|K1C9_HUMAN	Pyro-glu from Q		FALSE
Q(-17.03)FPILLDFK	55.44	1102.61	9	6.1	552.314	2	30.2369	72900	459000	6861	20210616_HS_C_50ng_F4-2.raw	1	P05546|HEP2_HUMAN	Pyro-glu from Q		FALSE
Q(-17.03)FSFPLSSE(+21.98)PFQGSYK	57.42	1852.83	16	3.5	927.425	2	26.9432	279000	2270000	6230	20210616_HS_C_50ng_F4-2.raw	3	P01023|A2MG_HUMAN	Pyro-glu from Q; Sodium adduct	Q1:Pyro-glu from Q:1000.00;E9:Sodium adduct:38.64	FALSE
Q(-17.03)FSFPLSSEPFQGSYK	59.34	1830.85	16	3.1	916.433	2	26.8801	6800000	32400000	6090	20210616_HS_C_50ng_F3-3.raw	6	P01023|A2MG_HUMAN	Pyro-glu from Q		FALSE
Q(-17.03)FSSSYLSR	53.19	1056.49	9	1.8	529.252	2	18.1202	43600	410000	3618	20210616_HS_C_50ng_F4-3.raw	1	P35527|K1C9_HUMAN	Pyro-glu from Q		FALSE
Q(-17.03)GHN(+0.98)SVFLIK	51.45	1125.58	10	4.3	563.801	2	19.325	2100000	13200000	3984	20210616_HS_C_50ng_F3-1.raw	3	P02790|HEMO_HUMAN;Q9BS19|Q9BS19_HUMAN	Pyro-glu from Q; Deamidation (NQ)		FALSE
Q(-17.03)GHNSVFLIK	59.86	1124.6	10	3	563.308	2	18.8973	11400000	39600000	4358	20210616_HS_C_50ng_F2-2.raw	6	P02790|HEMO_HUMAN;Q9BS19|Q9BS19_HUMAN	Pyro-glu from Q		FALSE
Q(-17.03)GIPFFGQVR	52.76	1130.59	10	3.7	566.303	2	25.0703	11000000	106000000	5571	20210616_HS_C_50ng_F4-1.raw	15	P01023|A2MG_HUMAN	Pyro-glu from Q		FALSE
Q(-17.03)GLLPVLE(+21.98)SFK	41.91	1234.66	11	3.7	618.338	2	28.927	1040000	6100000	6614	20210616_HS_C_50ng_F4-2.raw	3	F8W696|F8W696_HUMAN;P02647|APOA1_HUMAN	Pyro-glu from Q; Sodium adduct	Q1:Pyro-glu from Q:1000.00;E8:Sodium adduct:57.45	FALSE
Q(-17.03)GLLPVLESFK	60.43	1212.68	11	3.7	607.347	2	28.927	7640000	62700000	6605	20210616_HS_C_50ng_F4-2.raw	14	F8W696|F8W696_HUMAN;P02647|APOA1_HUMAN	Pyro-glu from Q		FALSE
Q(-17.03)GPVNLLSDPE(+21.98)QGVEVTGQYER	57.62	2419.13	22	3.1	807.385	3	24.0371	181000	1720000	5697	20210616_HS_C_50ng_F5-1.raw	2	Q14624|ITIH4_HUMAN;B7ZKJ8|B7ZKJ8_HUMAN	Pyro-glu from Q; Sodium adduct	Q1:Pyro-glu from Q:1000.00;E11:Sodium adduct:14.04	FALSE
Q(-17.03)GPVNLLSDPEQGVEVTGQYER	64.52	2397.14	22	3.2	800.058	3	24.1665	554000	5100000	5750	20210616_HS_C_50ng_F5-2.raw	4	Q14624|ITIH4_HUMAN;B7ZKJ8|B7ZKJ8_HUMAN	Pyro-glu from Q		FALSE
Q(-17.03)GSFQGGFR	47.02	965.436	9	0.6	483.725	2	13.9605	1660000	1430000	2754	20210616_HS_C_50ng_F4-3.raw	3	A0A140TA32|A0A140TA32_HUMAN;A0A140TA29|A0A140TA29_HUMAN;A0A3B3ISD7|A0A3B3ISD7_HUMAN;P0C0L4|CO4A_HUMAN;P0C0L5|CO4B_HUMAN;A0A0G2JPR0|A0A0G2JPR0_HUMAN;A0A140TA49|A0A140TA49_HUMAN;F5GXS0|F5GXS0_HUMAN;A0A140TA44|A0A140TA44_HUMAN;A0A3B3ISA6|A0A3B3ISA6_HUMAN;A0A0G2JL54|A0A0G2JL54_HUMAN	Pyro-glu from Q		FALSE
Q(-17.03)GVD(+21.98)ADIN(+0.98)GLR	46.86	1162.52	11	1.4	582.272	2	16.5818	341000	1280000	4435	20210616_HS_C_50ng_F5-3.raw	3	K7EQQ3|K7EQQ3_HUMAN;P35527|K1C9_HUMAN	Pyro-glu from Q; Sodium adduct; Deamidation (NQ)	Q1:Pyro-glu from Q:1000.00;D4:Sodium adduct:32.28;N8:Deamidation (NQ):1000.00	FALSE
Q(-17.03)GVDADINGLR	55.11	1139.56	11	4	570.788	2	17.3902	431000	4670000	3296	20210616_HS_C_50ng_F4-1.raw	4	K7EQQ3|K7EQQ3_HUMAN;P35527|K1C9_HUMAN	Pyro-glu from Q		FALSE
Q(-17.03)GYFVEAQPK	51.72	1148.55	10	5.3	575.285	2	17.191	1020000	5190000	3373	20210616_HS_C_50ng_F4-3.raw	3	P02743|SAMP_HUMAN	Pyro-glu from Q		FALSE
Q(-17.03)IDDIDVR	47.09	955.461	8	2.7	478.739	2	17.191	863000	3630000	3382	20210616_HS_C_50ng_F4-3.raw	3	P04114|APOB_HUMAN	Pyro-glu from Q		FALSE
Q(-17.03)IND(+21.98)YVEK	40.47	1012.45	8	-0.1	507.232	2	12.788	10700000	16900000	2846	20210616_HS_C_50ng_F2-3.raw	8		Pyro-glu from Q; Sodium adduct	Q1:Pyro-glu from Q:1000.00;D4:Sodium adduct:42.61	FALSE
Q(-17.03)INDYVEK	49.03	990.466	8	0	496.24	2	13.3412	11600000	54600000	2565	20210616_HS_C_50ng_F4-3.raw	19		Pyro-glu from Q		FALSE
Q(-17.03)IQVSWLR	38.61	1011.55	8	1.9	506.783	2	23.9924	313000	2250000	5749	20210616_HS_C_50ng_F2-2.raw	3	P01871|IGHM_HUMAN	Pyro-glu from Q		FALSE
Q(-17.03)ISNLQQSISDAEQR	66.09	1698.82	15	4.8	850.42	2	20.8291	3120000	27100000	5107	20210616_HS_C_50ng_F5-2.raw	10	#CONTAM#cont|000132|;#CONTAM#cont|000135|;#CONTAM#cont|000134|;P04264|K2C1_HUMAN	Pyro-glu from Q		FALSE
Q(-17.03)KPDGVFQEDAPVIHQEM(+15.99)IGGLR	73.83	2562.25	23	2.2	855.094	3	22.4346	3820000	26400000	5023	20210616_HS_C_50ng_F3-1.raw	5	P01024|CO3_HUMAN	Pyro-glu from Q; Oxidation (M)		FALSE
Q(-17.03)KWEAEPVYVQR	40.74	1514.75	12	4.5	758.387	2	18.8906	74000	1850000	3932	20210616_HS_C_50ng_F3-2.raw	4	C9JEV0|C9JEV0_HUMAN;P25311|ZA2G_HUMAN	Pyro-glu from Q		FALSE
Q(-17.03)LGAGSIEEC(+57.02)AAK	63.07	1315.61	13	-0.4	658.811	2	16.4801	1080000	6030000	3113	20210616_HS_C_50ng_F4-1.raw	3	P00747|PLMN_HUMAN	Pyro-glu from Q; Carbamidomethylation	C10:Carbamidomethylation:1000.00	FALSE
Q(-17.03)LNEINYEDHK	57.77	1384.63	11	-1.4	693.319	2	16.1716	5210000	35600000	3202	20210616_HS_C_50ng_F3-1.raw	9	E7ETN3|E7ETN3_HUMAN;P00751|CFAB_HUMAN;A0A0G2JH38|A0A0G2JH38_HUMAN;B4E1Z4|B4E1Z4_HUMAN	Pyro-glu from Q		FALSE
Q(-17.03)LYGDTGVLGR	64.48	1160.58	11	0	581.299	2	19.5982	167000	2600000	3987	20210616_HS_C_50ng_F4-2.raw	3	P07360|CO8G_HUMAN	Pyro-glu from Q		FALSE
Q(-17.03)N(+0.98)C(+57.02)ELFE(+21.98)QLGEYK	46.94	1662.68	13	4.8	832.356	2	23.8291	1340000	5120000	5848	20210616_HS_C_50ng_F5-3.raw	2	A0A0C4DGB6|A0A0C4DGB6_HUMAN;A0A087WWT3|A0A087WWT3_HUMAN;P02768|ALBU_HUMAN;C9JKR2|C9JKR2_HUMAN;D6RHD5|D6RHD5_HUMAN;B7WNR0|B7WNR0_HUMAN;H0YA55|H0YA55_HUMAN	Pyro-glu from Q; Deamidation (NQ); Carbamidomethylation; Sodium adduct	Q1:Pyro-glu from Q:1000.00;N2:Deamidation (NQ):34.90;C3:Carbamidomethylation:1000.00;E7:Sodium adduct:11.12	FALSE
Q(-17.03)N(+0.98)C(+57.02)ELFEQLGEYK	61.31	1640.7	13	6.4	821.367	2	24.5465	1920000	8690000	5836	20210616_HS_C_50ng_F5-3.raw	3	A0A0C4DGB6|A0A0C4DGB6_HUMAN;A0A087WWT3|A0A087WWT3_HUMAN;P02768|ALBU_HUMAN;C9JKR2|C9JKR2_HUMAN;D6RHD5|D6RHD5_HUMAN;B7WNR0|B7WNR0_HUMAN;H0YA55|H0YA55_HUMAN	Pyro-glu from Q; Deamidation (NQ); Carbamidomethylation	Q1:Pyro-glu from Q:1000.00;N2:Deamidation (NQ):71.27;C3:Carbamidomethylation:1000.00	FALSE
Q(-17.03)NC(+57.02)E(+21.98)LFEQ(+0.98)LGEYK	43.8	1662.68	13	8.2	832.356	2	24.2468	316000	2280000	5345	20210616_HS_C_50ng_F4-1.raw	2	A0A0C4DGB6|A0A0C4DGB6_HUMAN;A0A087WWT3|A0A087WWT3_HUMAN;P02768|ALBU_HUMAN;C9JKR2|C9JKR2_HUMAN;D6RHD5|D6RHD5_HUMAN;B7WNR0|B7WNR0_HUMAN;H0YA55|H0YA55_HUMAN	Pyro-glu from Q; Carbamidomethylation; Sodium adduct; Deamidation (NQ)	Q1:Pyro-glu from Q:1000.00;C3:Carbamidomethylation:1000.00;E4:Sodium adduct:25.58;Q8:Deamidation (NQ):49.80	FALSE
Q(-17.03)NC(+57.02)E(+21.98)LFEQLGEYK	66.73	1661.7	13	4.3	831.861	2	24.4314	8920000	43700000	5523	20210616_HS_C_50ng_F4-1.raw	11	A0A0C4DGB6|A0A0C4DGB6_HUMAN;A0A087WWT3|A0A087WWT3_HUMAN;P02768|ALBU_HUMAN;C9JKR2|C9JKR2_HUMAN;D6RHD5|D6RHD5_HUMAN;B7WNR0|B7WNR0_HUMAN;H0YA55|H0YA55_HUMAN	Pyro-glu from Q; Carbamidomethylation; Sodium adduct	Q1:Pyro-glu from Q:1000.00;C3:Carbamidomethylation:1000.00;E4:Sodium adduct:0.00	FALSE
Q(-17.03)NC(+57.02)ELFE(+21.98)Q(+0.98)LGEYK	31.56	1662.68	13	6.7	555.239	3	23.5371			5373	20210616_HS_C_50ng_F3-3.raw	1	A0A0C4DGB6|A0A0C4DGB6_HUMAN;A0A087WWT3|A0A087WWT3_HUMAN;P02768|ALBU_HUMAN;C9JKR2|C9JKR2_HUMAN;D6RHD5|D6RHD5_HUMAN;B7WNR0|B7WNR0_HUMAN;H0YA55|H0YA55_HUMAN	Pyro-glu from Q; Carbamidomethylation; Sodium adduct; Deamidation (NQ)	Q1:Pyro-glu from Q:1000.00;C3:Carbamidomethylation:1000.00;E7:Sodium adduct:6.63;Q8:Deamidation (NQ):15.57	FALSE
Q(-17.03)NC(+57.02)ELFE(+21.98)QLGEYK	73.91	1661.7	13	4.2	831.861	2	23.5149	32500000	245000000	5134	20210616_HS_C_50ng_F4-1.raw	25	A0A0C4DGB6|A0A0C4DGB6_HUMAN;A0A087WWT3|A0A087WWT3_HUMAN;P02768|ALBU_HUMAN;C9JKR2|C9JKR2_HUMAN;D6RHD5|D6RHD5_HUMAN;B7WNR0|B7WNR0_HUMAN;H0YA55|H0YA55_HUMAN	Pyro-glu from Q; Carbamidomethylation; Sodium adduct	Q1:Pyro-glu from Q:1000.00;C3:Carbamidomethylation:1000.00;E7:Sodium adduct:35.77	FALSE
Q(-17.03)NC(+57.02)ELFEQLGEYK	77.15	1639.72	13	-8.8	820.86	2	23.6276	209000000	1660000000	5397	20210616_HS_C_50ng_F4-2.raw	94	A0A0C4DGB6|A0A0C4DGB6_HUMAN;A0A087WWT3|A0A087WWT3_HUMAN;P02768|ALBU_HUMAN;C9JKR2|C9JKR2_HUMAN;D6RHD5|D6RHD5_HUMAN;B7WNR0|B7WNR0_HUMAN;H0YA55|H0YA55_HUMAN	Pyro-glu from Q; Carbamidomethylation	C3:Carbamidomethylation:1000.00	FALSE
Q(-17.03)PQFISR	47.7	857.439	7	0.2	429.727	2	14.837	593000	1120000	2825	20210616_HS_C_50ng_F4-3.raw	2	P04004|VTNC_HUMAN	Pyro-glu from Q		FALSE
Q(-17.03)PSSAFAAFVK	71.48	1134.57	11	4.9	568.295	2	22.9159	8130000	76700000	5052	20210616_HS_C_50ng_F4-2.raw	9	P01024|CO3_HUMAN	Pyro-glu from Q		FALSE
Q(-17.03)PVPGQQM(+15.99)TLK	61.36	1224.62	11	0.9	613.317	2	12.1495	9690000	28400000	2296	20210616_HS_C_50ng_F4-3.raw	8	P01024|CO3_HUMAN	Pyro-glu from Q; Oxidation (M)		FALSE
Q(-17.03)QNAQGGFSSTQD(+21.98)TVVALHALSK	61.96	2391.14	23	2.3	798.057	3	22.3257			4866	20210616_HS_C_50ng_F4-2.raw	2	P01023|A2MG_HUMAN	Pyro-glu from Q; Sodium adduct	Q1:Pyro-glu from Q:1000.00;D13:Sodium adduct:85.70	FALSE
Q(-17.03)QNAQGGFSSTQDTVVALHALSK	73.97	2369.16	23	3.9	790.731	3	22.2548	2970000	26700000	4889	20210616_HS_C_50ng_F4-3.raw	12	P01023|A2MG_HUMAN	Pyro-glu from Q		FALSE
Q(-17.03)QTHM(+15.99)LDVM(+15.99)QDHFSR	42.62	1886.8	15	0.2	629.942	3	15.3503	234000	2050000	2723	20210616_HS_C_50ng_F1-2.raw	4	H0YLK8|H0YLK8_HUMAN;P10909|CLUS_HUMAN;H0YC35|H0YC35_HUMAN;E7ETB4|E7ETB4_HUMAN;E7ERK6|E7ERK6_HUMAN	Pyro-glu from Q; Oxidation (M); Oxidation (M)		FALSE
Q(-17.03)SED(+21.98)STFYLGER	54.53	1435.59	12	3.2	718.803	2	18.4831	418000	2770000	3715	20210616_HS_C_50ng_F4-3.raw	3	E9PFZ2|E9PFZ2_HUMAN;H7C5R1|H7C5R1_HUMAN;P00450|CERU_HUMAN	Pyro-glu from Q; Sodium adduct	Q1:Pyro-glu from Q:1000.00;D4:Sodium adduct:27.96	FALSE
Q(-17.03)SEDSTFYLGER	64.27	1413.6	12	0.2	707.81	2	18.3248	4280000	31500000	3523	20210616_HS_C_50ng_F4-1.raw	9	E9PFZ2|E9PFZ2_HUMAN;H7C5R1|H7C5R1_HUMAN;P00450|CERU_HUMAN	Pyro-glu from Q		FALSE
Q(-17.03)SFDLSVK	49.69	905.449	8	-0.3	453.732	2	18.6761	180000	1220000	3701	20210616_HS_C_50ng_F4-2.raw	3	P04114|APOB_HUMAN	Pyro-glu from Q		FALSE
Q(-17.03)SLEASLAETEGR	65.71	1372.65	13	-0.9	687.33	2	18.6427	1360000	10500000	3756	20210616_HS_C_50ng_F4-3.raw	6	#CONTAM#cont|000133|;#CONTAM#cont|000131|;P13645|K1C10_HUMAN;#CONTAM#cont|000129|;#CONTAM#cont|000136|;#CONTAM#cont|000122|;#CONTAM#cont|000130|	Pyro-glu from Q		FALSE
Q(-17.03)SSSYSFFK	46.18	1062.47	9	3.8	532.242	2	19.3111	50000	419000	3892	20210616_HS_C_50ng_F4-2.raw	1	P04003|C4BPA_HUMAN	Pyro-glu from Q		FALSE
Q(-17.03)SVE(+21.98)ADIN(+0.98)GLR	45.54	1206.55	11	1.1	604.285	2	17.1127	367000	1720000	4526	20210616_HS_C_50ng_F5-3.raw	3	#CONTAM#cont|000133|;#CONTAM#cont|000131|;P13645|K1C10_HUMAN;#CONTAM#cont|000129|;#CONTAM#cont|000136|;#CONTAM#cont|000122|;#CONTAM#cont|000130|	Pyro-glu from Q; Sodium adduct; Deamidation (NQ)	Q1:Pyro-glu from Q:1000.00;E4:Sodium adduct:11.10;N8:Deamidation (NQ):1000.00	FALSE
Q(-17.03)SVEADIN(+0.98)GLR	48.79	1184.57	11	3.8	593.293	2	17.0979	527000	3940000	3360	20210616_HS_C_50ng_F4-3.raw	6	#CONTAM#cont|000133|;#CONTAM#cont|000131|;P13645|K1C10_HUMAN;#CONTAM#cont|000129|;#CONTAM#cont|000136|;#CONTAM#cont|000122|;#CONTAM#cont|000130|	Pyro-glu from Q; Deamidation (NQ)		FALSE
Q(-17.03)SVEADINGLR	60.3	1183.58	11	3.7	592.801	2	18.7407	890000	7390000	3795	20210616_HS_C_50ng_F4-3.raw	5	#CONTAM#cont|000133|;#CONTAM#cont|000131|;P13645|K1C10_HUMAN;#CONTAM#cont|000129|;#CONTAM#cont|000136|;#CONTAM#cont|000122|;#CONTAM#cont|000130|	Pyro-glu from Q		FALSE
Q(-17.03)TALVE(+21.98)LVK	49.4	1004.55	9	-0.9	503.283	2	22.0814	65000000	636000000	4649	20210616_HS_C_50ng_F4-1.raw	25	A0A0C4DGB6|A0A0C4DGB6_HUMAN;A0A087WWT3|A0A087WWT3_HUMAN;P02768|ALBU_HUMAN;C9JKR2|C9JKR2_HUMAN;D6RHD5|D6RHD5_HUMAN;B7WNR0|B7WNR0_HUMAN;H0YA55|H0YA55_HUMAN	Pyro-glu from Q; Sodium adduct	Q1:Pyro-glu from Q:1000.00;E6:Sodium adduct:59.93	FALSE
Q(-17.03)TALVELLK	49.77	996.586	9	0.7	499.3	2	22.4874	1390000	11600000	4966	20210616_HS_C_50ng_F4-3.raw	8	#CONTAM#cont|000097|;#CONTAM#cont|000035|;#CONTAM#cont|000017|	Pyro-glu from Q		FALSE
Q(-17.03)TALVELVK	52.3	982.57	9	0.2	492.294	2	22.2657	144000000	1300000000	5455	20210616_HS_C_50ng_F5-3.raw	72	A0A0C4DGB6|A0A0C4DGB6_HUMAN;A0A087WWT3|A0A087WWT3_HUMAN;P02768|ALBU_HUMAN;C9JKR2|C9JKR2_HUMAN;D6RHD5|D6RHD5_HUMAN;B7WNR0|B7WNR0_HUMAN;H0YA55|H0YA55_HUMAN	Pyro-glu from Q		FALSE
Q(-17.03)TALVELVKHKPK	37.44	1472.87	13	0.3	491.965	3	20.2049	34000	424000	3955	20210616_HS_C_50ng_F1-1.raw	1	A0A0C4DGB6|A0A0C4DGB6_HUMAN;A0A087WWT3|A0A087WWT3_HUMAN;P02768|ALBU_HUMAN;C9JKR2|C9JKR2_HUMAN;D6RHD5|D6RHD5_HUMAN;B7WNR0|B7WNR0_HUMAN;H0YA55|H0YA55_HUMAN	Pyro-glu from Q		FALSE
Q(-17.03)THQPPAPNSLIR	51.45	1440.75	13	-3.3	721.379	2	16.8264	886000	8520000	3297	20210616_HS_C_50ng_F3-1.raw	5	P02747|C1QC_HUMAN	Pyro-glu from Q		FALSE
Q(-17.03)TQVSVLPEGGETPLFK	66.53	1811.93	17	4.9	906.977	2	24.2836	1030000	8820000	5505	20210616_HS_C_50ng_F4-2.raw	6	A0A0A0MS51|A0A0A0MS51_HUMAN;P06396|GELS_HUMAN;A0A0A0MT01|A0A0A0MT01_HUMAN	Pyro-glu from Q		FALSE
Q(-17.03)TVSWAVTPK	63.26	1098.57	10	3.6	550.295	2	19.3098	4810000	44500000	3882	20210616_HS_C_50ng_F4-2.raw	11	P01023|A2MG_HUMAN	Pyro-glu from Q		FALSE
Q(-17.03)VGSGVTTD(+21.98)QVQAEAK	56.54	1621.76	16	2.1	811.887	2	14.915	2820000	10400000	2784	20210616_HS_C_50ng_F4-2.raw	9	P01871|IGHM_HUMAN	Pyro-glu from Q; Sodium adduct	Q1:Pyro-glu from Q:1000.00;D9:Sodium adduct:45.16	FALSE
Q(-17.03)VGSGVTTDQVQAEAK	70.83	1599.77	16	0.1	800.894	2	14.915	10100000	67000000	2914	20210616_HS_C_50ng_F4-2.raw	17	P01871|IGHM_HUMAN	Pyro-glu from Q		FALSE
Q(-17.03)VLDNLTM(+15.99)EK	47.88	1188.57	10	-3.2	595.29	2	18.0495	1450000	10200000	4102	20210616_HS_C_50ng_F2-2.raw	7	K7EQQ3|K7EQQ3_HUMAN;P35527|K1C9_HUMAN	Pyro-glu from Q; Oxidation (M)		FALSE
Q(-17.03)VQLQQEAEPLK	39.12	1392.72	12	9.3	697.376	2	19.2833	1120000	10200000	3796	20210616_HS_C_50ng_F4-1.raw	3		Pyro-glu from Q		FALSE
Q(-17.03)VVAGLNFR	60.84	985.534	9	1	493.775	2	21.3382	2660000	20000000	4581	20210616_HS_C_50ng_F4-3.raw	6	P01042|KNG1_HUMAN	Pyro-glu from Q		FALSE
Q(-17.03)YYEGSEIVVAGR	68.82	1452.69	13	0.7	727.352	2	19.489	1610000	13400000	4009	20210616_HS_C_50ng_F4-3.raw	8	P19827|ITIH1_HUMAN	Pyro-glu from Q		FALSE
QAVDTAVDGVFIR	55.08	1389.73	13	2.8	695.872	2	20.4461	632000	6750000	4361	20210616_HS_C_50ng_F3-1.raw	3	P19827|ITIH1_HUMAN;F8WAS2|F8WAS2_HUMAN			FALSE
QDPPSVVVTSHQAPGEK	25.51	1774.88	17	2	592.638	3	12.7311	191000	675000	2739	20210616_HS_C_50ng_F2-3.raw	1	P25311|ZA2G_HUMAN			FALSE
QEC(+57.02)SIPVC(+57.02)GQDQVTVAM(+15.99)TPR	46.77	2291.03	20	0.4	764.686	3	18.1538	110000	1840000	3499	20210616_HS_C_50ng_F4-1.raw	2	C9JV37|C9JV37_HUMAN;P00734|THRB_HUMAN;E9PIT3|E9PIT3_HUMAN	Carbamidomethylation; Carbamidomethylation; Oxidation (M)	C3:Carbamidomethylation:1000.00;C8:Carbamidomethylation:1000.00	FALSE
QEPERNEC(+57.02)FLQHKDDNPNLPR	51.53	2635.22	21	-6.3	659.808	4	16.5127	4240000	26500000	2990	20210616_HS_C_50ng_F1-2.raw	10	A0A0C4DGB6|A0A0C4DGB6_HUMAN;A0A087WWT3|A0A087WWT3_HUMAN;P02768|ALBU_HUMAN;H7C013|H7C013_HUMAN	Carbamidomethylation	C8:Carbamidomethylation:1000.00	FALSE
QEPSQ(+0.98)GTTTFAVTSILR	56.15	1835.93	17	9.4	918.979	2	23.3438	187000	1700000	5086	20210616_HS_C_50ng_F4-1.raw	1	P01876|IGHA1_HUMAN;A0A286YEY1|A0A286YEY1_HUMAN	Deamidation (NQ)	Q5:Deamidation (NQ):0.00	FALSE
QEPSQGTTTFAVTSILR	75.07	1834.94	17	-0.1	918.482	2	24.5438	7500000	74100000	5882	20210616_HS_C_50ng_F5-3.raw	17	P01876|IGHA1_HUMAN;A0A286YEY1|A0A286YEY1_HUMAN			FALSE
QEYEQLIAK	49.28	1120.58	9	6	561.299	2	13.8828	654000	3010000	2958	20210616_HS_C_50ng_F2-1.raw	3	K7EQQ3|K7EQQ3_HUMAN;P35527|K1C9_HUMAN			FALSE
QFPILLDFK	44.52	1119.63	9	5.8	560.827	2	27.0358	113000	865000	6346	20210616_HS_C_50ng_F2-2.raw	2	P05546|HEP2_HUMAN			FALSE
QFSFPLSSEPFQGSYK	56.61	1847.87	16	4.3	924.948	2	24.9934	1650000	9440000	5708	20210616_HS_C_50ng_F3-1.raw	6	P01023|A2MG_HUMAN			FALSE
QGIPFFGQVR	43.28	1147.61	10	2.4	574.816	2	22.9873	1260000	2920000	5599	20210616_HS_C_50ng_F2-1.raw	1	P01023|A2MG_HUMAN			FALSE
QGLLPVLESFK	62.21	1229.7	11	1.1	615.859	2	25.972	5010000	26200000	6144	20210616_HS_C_50ng_F2-2.raw	6	F8W696|F8W696_HUMAN;P02647|APOA1_HUMAN			FALSE
QGPVNLLSDPEQGVEVTGQYER	60.25	2414.17	22	2.9	805.733	3	22.3881	113000	1830000	4779	20210616_HS_C_50ng_F4-1.raw	3	Q14624|ITIH4_HUMAN;B7ZKJ8|B7ZKJ8_HUMAN			FALSE
QGVDADINGLR	49.08	1156.58	11	0.9	579.301	2	15.2247	298000	1900000	3322	20210616_HS_C_50ng_F2-3.raw	3	K7EQQ3|K7EQQ3_HUMAN;P35527|K1C9_HUMAN			FALSE
QGYFVEAQPK	43.96	1165.58	10	3.2	583.799	2	13.4675	754000	2100000	2894	20210616_HS_C_50ng_F2-3.raw	3	P02743|SAMP_HUMAN			FALSE
QIQVSWLR	42.32	1028.58	8	3.1	515.297	2	21.0659	1690000	14000000	4986	20210616_HS_C_50ng_F2-2.raw	4	P01871|IGHM_HUMAN			FALSE
QISNLQQSISDAEQR	65.08	1715.84	15	0.9	858.93	2	17.6687	949000	9310000	3525	20210616_HS_C_50ng_F3-1.raw	6	#CONTAM#cont|000132|;#CONTAM#cont|000135|;#CONTAM#cont|000134|;P04264|K2C1_HUMAN			FALSE
QN(+0.98)C(+57.02)ELFEQLGEYK	52.91	1657.73	13	8.2	829.879	2	22.4852	1200000	8490000	4971	20210616_HS_C_50ng_F4-3.raw	3	A0A0C4DGB6|A0A0C4DGB6_HUMAN;A0A087WWT3|A0A087WWT3_HUMAN;P02768|ALBU_HUMAN;C9JKR2|C9JKR2_HUMAN;D6RHD5|D6RHD5_HUMAN;B7WNR0|B7WNR0_HUMAN;H0YA55|H0YA55_HUMAN	Deamidation (NQ); Carbamidomethylation	N2:Deamidation (NQ):0.00;C3:Carbamidomethylation:1000.00	FALSE
QNC(+57.02)E(+21.98)LFEQLGEYK	45.59	1678.73	13	4.3	560.585	3	21.8531	608000	3960000	4873	20210616_HS_C_50ng_F3-2.raw	1	A0A0C4DGB6|A0A0C4DGB6_HUMAN;A0A087WWT3|A0A087WWT3_HUMAN;P02768|ALBU_HUMAN;C9JKR2|C9JKR2_HUMAN;D6RHD5|D6RHD5_HUMAN;B7WNR0|B7WNR0_HUMAN;H0YA55|H0YA55_HUMAN	Carbamidomethylation; Sodium adduct	C3:Carbamidomethylation:1000.00;E4:Sodium adduct:32.46	FALSE
QNC(+57.02)ELFE(+21.98)QLGEYK	46.91	1678.73	13	3.2	560.585	3	21.8381	1250000	8850000	4867	20210616_HS_C_50ng_F3-3.raw	3	A0A0C4DGB6|A0A0C4DGB6_HUMAN;A0A087WWT3|A0A087WWT3_HUMAN;P02768|ALBU_HUMAN;C9JKR2|C9JKR2_HUMAN;D6RHD5|D6RHD5_HUMAN;B7WNR0|B7WNR0_HUMAN;H0YA55|H0YA55_HUMAN	Carbamidomethylation; Sodium adduct	C3:Carbamidomethylation:1000.00;E7:Sodium adduct:0.00	FALSE
QNC(+57.02)ELFEQLGE(+21.98)YK	44.17	1678.73	13	4.9	840.375	2	21.8531	408000	4160000	4874	20210616_HS_C_50ng_F3-2.raw	2	A0A0C4DGB6|A0A0C4DGB6_HUMAN;A0A087WWT3|A0A087WWT3_HUMAN;P02768|ALBU_HUMAN;C9JKR2|C9JKR2_HUMAN;D6RHD5|D6RHD5_HUMAN;B7WNR0|B7WNR0_HUMAN;H0YA55|H0YA55_HUMAN	Carbamidomethylation; Sodium adduct	C3:Carbamidomethylation:1000.00;E11:Sodium adduct:12.19	FALSE
QNC(+57.02)ELFEQLGEYK	66.93	1656.75	13	-4.7	829.376	2	21.8883	95400000	760000000	4817	20210616_HS_C_50ng_F3-1.raw	72	A0A0C4DGB6|A0A0C4DGB6_HUMAN;A0A087WWT3|A0A087WWT3_HUMAN;P02768|ALBU_HUMAN;C9JKR2|C9JKR2_HUMAN;D6RHD5|D6RHD5_HUMAN;B7WNR0|B7WNR0_HUMAN;H0YA55|H0YA55_HUMAN	Carbamidomethylation	C3:Carbamidomethylation:1000.00	FALSE
QQNAQGGFSSTQDTVVALHALSK	58.38	2386.19	23	5.1	796.407	3	21.3112	644000	4670000	5074	20210616_HS_C_50ng_F2-2.raw	3	P01023|A2MG_HUMAN			FALSE
QSEDSTFYLGER	54.82	1430.63	12	2.9	716.325	2	16.467	962000	7190000	3198	20210616_HS_C_50ng_F3-1.raw	5	E9PFZ2|E9PFZ2_HUMAN;H7C5R1|H7C5R1_HUMAN;P00450|CERU_HUMAN			FALSE
QSFDLSVK	33.78	922.476	8	1.9	462.246	2	15.3632	71600	538000	3345	20210616_HS_C_50ng_F2-1.raw	1	P04114|APOB_HUMAN			FALSE
QSLEASLAETEGR	54.13	1389.67	13	-1.7	695.843	2	18.6439	536000	3970000	3703	20210616_HS_C_50ng_F4-2.raw	5	#CONTAM#cont|000133|;#CONTAM#cont|000131|;P13645|K1C10_HUMAN;#CONTAM#cont|000129|;#CONTAM#cont|000136|;#CONTAM#cont|000122|;#CONTAM#cont|000130|			FALSE
QSVEADIN(+0.98)GLR	47.66	1201.59	11	2.6	601.806	2	13.887	94900	383000	2639	20210616_HS_C_50ng_F3-3.raw	1	#CONTAM#cont|000133|;#CONTAM#cont|000131|;P13645|K1C10_HUMAN;#CONTAM#cont|000129|;#CONTAM#cont|000136|;#CONTAM#cont|000122|;#CONTAM#cont|000130|	Deamidation (NQ)	N8:Deamidation (NQ):83.89	FALSE
QSVEADINGLR	45.94	1200.61	11	1.2	601.313	2	16.4409	182000	1600000	3232	20210616_HS_C_50ng_F3-2.raw	4	#CONTAM#cont|000133|;#CONTAM#cont|000131|;P13645|K1C10_HUMAN;#CONTAM#cont|000129|;#CONTAM#cont|000136|;#CONTAM#cont|000122|;#CONTAM#cont|000130|			FALSE
QTALVE(+21.98)LVK	38.21	1021.58	9	0.7	511.797	2	18.6364	13300000	42900000	4254	20210616_HS_C_50ng_F2-2.raw	4	A0A0C4DGB6|A0A0C4DGB6_HUMAN;A0A087WWT3|A0A087WWT3_HUMAN;P02768|ALBU_HUMAN;C9JKR2|C9JKR2_HUMAN;D6RHD5|D6RHD5_HUMAN;B7WNR0|B7WNR0_HUMAN;H0YA55|H0YA55_HUMAN	Sodium adduct	E6:Sodium adduct:43.31	FALSE
QTALVELLK	43.63	1013.61	9	0	507.815	2	18.9979	1010000	3670000	4411	20210616_HS_C_50ng_F2-3.raw	2	#CONTAM#cont|000097|;#CONTAM#cont|000035|;#CONTAM#cont|000017|			FALSE
QTALVELVK	50.12	999.596	9	3	500.807	2	21.9137	9750000	86200000	5242	20210616_HS_C_50ng_F2-2.raw	66	A0A0C4DGB6|A0A0C4DGB6_HUMAN;A0A087WWT3|A0A087WWT3_HUMAN;P02768|ALBU_HUMAN;C9JKR2|C9JKR2_HUMAN;D6RHD5|D6RHD5_HUMAN;B7WNR0|B7WNR0_HUMAN;H0YA55|H0YA55_HUMAN			FALSE
QTQVSVLPEGGETPLFK	50.58	1828.96	17	4.6	915.49	2	22.9456	296000	3500000	5128	20210616_HS_C_50ng_F4-3.raw	4	A0A0A0MS51|A0A0A0MS51_HUMAN;P06396|GELS_HUMAN;A0A0A0MT01|A0A0A0MT01_HUMAN			FALSE
QTVSWAVTPK	52.91	1115.6	10	4.4	558.808	2	16.7354	6130000	47900000	3729	20210616_HS_C_50ng_F2-2.raw	7	P01023|A2MG_HUMAN			FALSE
QVAPVAGVAR(+21.98)	41.72	988.543	10	-1.7	495.28	2	16.0319			4351	20210616_HS_C_50ng_F5-3.raw	5		Sodium adduct		FALSE
QVGSGVTTDQVQAEAK	63.35	1616.8	16	-4.6	809.404	2	15.0136	1300000	6930000	2876	20210616_HS_C_50ng_F4-3.raw	4	P01871|IGHM_HUMAN			FALSE
QVVAGLNFR	50.15	1002.56	9	3.7	502.29	2	18.415	1350000	7980000	4196	20210616_HS_C_50ng_F2-2.raw	3	P01042|KNG1_HUMAN			FALSE
RHPDYSVVLLLR	78.13	1466.84	12	1.5	489.953	3	26.3793	25900000	203000000	5244	20210616_HS_C_50ng_F1-2.raw	39	A0A0C4DGB6|A0A0C4DGB6_HUMAN;P02768|ALBU_HUMAN;C9JKR2|C9JKR2_HUMAN;D6RHD5|D6RHD5_HUMAN;B7WNR0|B7WNR0_HUMAN;H0YA55|H0YA55_HUMAN			FALSE
RHPYFYAPELLFFAK	56.68	1897.99	15	-0.3	633.67	3	28.6374	899000	1690000	5604	20210616_HS_C_50ng_F1-1.raw	2	A0A0C4DGB6|A0A0C4DGB6_HUMAN;P02768|ALBU_HUMAN;H7C013|H7C013_HUMAN;D6RHD5|D6RHD5_HUMAN;B7WNR0|B7WNR0_HUMAN;H0YA55|H0YA55_HUMAN			FALSE
RIPIEDGSGEVVLSR	77	1625.87	15	1.7	542.966	3	18.7049	795000	6880000	4329	20210616_HS_C_50ng_F2-1.raw	3	P01024|CO3_HUMAN			FALSE
RPC(+57.02)FSALE(+21.98)VDETYVPK	56.36	1931.91	16	2.7	644.978	3	21.6913	1570000	8060000	5176	20210616_HS_C_50ng_F2-2.raw	3	A0A0C4DGB6|A0A0C4DGB6_HUMAN;A0A087WWT3|A0A087WWT3_HUMAN;P02768|ALBU_HUMAN;C9JKR2|C9JKR2_HUMAN;D6RHD5|D6RHD5_HUMAN;B7WNR0|B7WNR0_HUMAN;H0YA55|H0YA55_HUMAN	Carbamidomethylation; Sodium adduct	C3:Carbamidomethylation:1000.00;E8:Sodium adduct:12.19	FALSE
RPC(+57.02)FSALEVDE(+21.98)TYVPK	53.83	1931.91	16	1.8	644.977	3	21.6504	1630000	9070000	5219	20210616_HS_C_50ng_F2-1.raw	2	A0A0C4DGB6|A0A0C4DGB6_HUMAN;A0A087WWT3|A0A087WWT3_HUMAN;P02768|ALBU_HUMAN;C9JKR2|C9JKR2_HUMAN;D6RHD5|D6RHD5_HUMAN;B7WNR0|B7WNR0_HUMAN;H0YA55|H0YA55_HUMAN	Carbamidomethylation; Sodium adduct	C3:Carbamidomethylation:1000.00;E11:Sodium adduct:0.00	FALSE
RPC(+57.02)FSALEVDETYVPK	74.28	1909.92	16	0.3	637.649	3	21.7061	63100000	810000000	5174	20210616_HS_C_50ng_F2-2.raw	67	A0A0C4DGB6|A0A0C4DGB6_HUMAN;A0A087WWT3|A0A087WWT3_HUMAN;P02768|ALBU_HUMAN;C9JKR2|C9JKR2_HUMAN;D6RHD5|D6RHD5_HUMAN;B7WNR0|B7WNR0_HUMAN;H0YA55|H0YA55_HUMAN	Carbamidomethylation	C3:Carbamidomethylation:1000.00	FALSE
RPYFPVAVGK	40.66	1132.64	10	2.8	567.328	2	18.1267	824000	5390000	3428	20210616_HS_C_50ng_F1-1.raw	3	A0A0D9SG88|A0A0D9SG88_HUMAN;P08603|CFAH_HUMAN;Q5TFM2|Q5TFM2_HUMAN			FALSE
RTHLPEVFLSK	58.93	1325.75	11	2.6	442.924	3	19.0206	368000	2640000	3647	20210616_HS_C_50ng_F1-3.raw	3	P02774|VTDB_HUMAN;D6RF35|D6RF35_HUMAN			FALSE
RTVAAPSVFIFPPSDEQLK	50.39	2101.12	19	1.7	701.382	3	24.9899			6034	20210616_HS_C_50ng_F2-1.raw	1	P01834|IGKC_HUMAN			FALSE
SASDLTWD(+21.98)NLK	50.1	1270.58	11	1.4	636.298	2	18.8973	1300000	9150000	4344	20210616_HS_C_50ng_F2-2.raw	5	H7C5E8|H7C5E8_HUMAN;P02787|TRFE_HUMAN	Sodium adduct	D8:Sodium adduct:25.55	FALSE
SASDLTWDNLK	64.35	1248.6	11	-1.7	625.306	2	18.8911	52800000	303000000	4352	20210616_HS_C_50ng_F2-2.raw	37	H7C5E8|H7C5E8_HUMAN;P02787|TRFE_HUMAN			FALSE
SASLHLPK	42.49	851.486	8	-2.3	426.75	2	8.528	2540000	3290000	1538	20210616_HS_C_50ng_F1-3.raw	4				FALSE
SASNM(+15.99)AIVDVK	34.49	1149.57	11	2.7	575.794	2	7.4264	72300	311000	1401	20210616_HS_C_50ng_F3-3.raw	1	P01023|A2MG_HUMAN	Oxidation (M)		FALSE
SC(+57.02)AVAEYGVYVK	70.09	1344.64	12	3.4	673.329	2	17.6365	39200000	325000000	4127	20210616_HS_C_50ng_F2-2.raw	24	P00738|HPT_HUMAN;J3QLC9|J3QLC9_HUMAN;A0A087WU08|A0A087WU08_HUMAN;H0Y300|H0Y300_HUMAN;A0A0C4DGL8|A0A0C4DGL8_HUMAN;J3QR68|J3QR68_HUMAN	Carbamidomethylation	C2:Carbamidomethylation:1000.00	FALSE
SC(+57.02)DNPYIPN(+0.98)GDYSPLR	54.25	1867.8	16	2	934.912	2	20.3759	2510000	13700000	4113	20210616_HS_C_50ng_F4-1.raw	3	A0A0D9SG88|A0A0D9SG88_HUMAN;P08603|CFAH_HUMAN;Q5TFM2|Q5TFM2_HUMAN	Carbamidomethylation; Deamidation (NQ)	C2:Carbamidomethylation:1000.00;N9:Deamidation (NQ):39.44	FALSE
SC(+57.02)DNPYIPNGDYSPLR	33.65	1866.82	16	2.2	934.42	2	20.3365	24800	797000	4232	20210616_HS_C_50ng_F4-2.raw	1	A0A0D9SG88|A0A0D9SG88_HUMAN;P08603|CFAH_HUMAN;Q5TFM2|Q5TFM2_HUMAN	Carbamidomethylation	C2:Carbamidomethylation:1000.00	FALSE
SC(+57.02)ESNSPFPVHPGTAEC(+57.02)C(+57.02)TK	74.11	2263.93	20	2.9	755.653	3	16.4801	2290000	14200000	3612	20210616_HS_C_50ng_F2-2.raw	3	D6RBJ7|D6RBJ7_HUMAN;P02774|VTDB_HUMAN;D6RF20|D6RF20_HUMAN;D6RF35|D6RF35_HUMAN	Carbamidomethylation; Carbamidomethylation; Carbamidomethylation	C2:Carbamidomethylation:1000.00;C17:Carbamidomethylation:1000.00;C18:Carbamidomethylation:1000.00	FALSE
SC(+57.02)VGETTESTQC(+57.02)EDEELEHLR	28.92	2508.04	21	4	837.023	3	17.8662	58500	935000	4090	20210616_HS_C_50ng_F2-1.raw	1	P10643|CO7_HUMAN	Carbamidomethylation; Carbamidomethylation	C2:Carbamidomethylation:1000.00;C12:Carbamidomethylation:1000.00	FALSE
SDDTAVYYC(+57.02)AR	49.06	1319.55	11	-2.5	660.778	2	7.3839	465000	2820000	1387	20210616_HS_C_50ng_F3-2.raw	5		Carbamidomethylation	C9:Carbamidomethylation:1000.00	FALSE
SDVGFLPPFPTLDPEEK	48.16	1886.93	17	4.6	944.477	2	27.555	618000	3350000	6327	20210616_HS_C_50ng_F4-3.raw	2	P43652|AFAM_HUMAN			FALSE
SDVM(+15.99)YTDWK	53.59	1159.49	9	4.5	580.753	2	13.9441	5860000	24100000	2967	20210616_HS_C_50ng_F2-2.raw	8	P19652|A1AG2_HUMAN	Oxidation (M)		FALSE
SDVVYTDWK	57.14	1111.52	9	3.4	556.768	2	16.4118	13400000	95700000	3579	20210616_HS_C_50ng_F2-2.raw	17	P02763|A1AG1_HUMAN			FALSE
SE(+21.98)GSSVNLSPPLEQC(+57.02)VPDR	40.2	2091.95	19	-4.3	698.321	3	19.778	29200	409000	3959	20210616_HS_C_50ng_F4-1.raw	1	C9JV37|C9JV37_HUMAN;P00734|THRB_HUMAN;E9PIT3|E9PIT3_HUMAN	Sodium adduct; Carbamidomethylation	E2:Sodium adduct:26.12;C15:Carbamidomethylation:1000.00	FALSE
SEETKENEGFTVTAEGK	38.47	1854.85	17	0.9	619.292	3	8.1785	189000	982000	1820	20210616_HS_C_50ng_F2-3.raw	2	P01024|CO3_HUMAN;M0QYC8|M0QYC8_HUMAN			FALSE
SEGSSVNLSPPLEQC(+57.02)VPDR	36.45	2069.97	19	2.6	1035.99	2	19.8482	419000	3010000	4110	20210616_HS_C_50ng_F4-3.raw	1	C9JV37|C9JV37_HUMAN;P00734|THRB_HUMAN;E9PIT3|E9PIT3_HUMAN	Carbamidomethylation	C15:Carbamidomethylation:1000.00	FALSE
SELEEQLTPVAEETR	68.21	1729.84	15	1.7	865.927	2	18.3624	2020000	17600000	3604	20210616_HS_C_50ng_F4-2.raw	7	E7ERP7|E7ERP7_HUMAN;E9PEV4|E9PEV4_HUMAN;P02649|APOE_HUMAN;H0Y7L5|H0Y7L5_HUMAN			FALSE
SELTQQLNALFQDK	55.03	1633.83	14	3.7	817.926	2	25.4474	47600	553000	5813	20210616_HS_C_50ng_F3-1.raw	1	P06727|APOA4_HUMAN			FALSE
SEYQADYESLR	50.7	1359.59	11	-1.2	680.804	2	14.0521	3010000	14400000	2763	20210616_HS_C_50ng_F3-1.raw	8	P04114|APOB_HUMAN			FALSE
SGAQATWTELPWPHEK	51.12	1836.88	16	3.5	613.303	3	23.1285	3000000	15400000	5611	20210616_HS_C_50ng_F2-1.raw	6	P02790|HEMO_HUMAN			FALSE
SGFSFGFK	38.9	875.418	8	1.4	438.717	2	20.5882	44200	326000	4917	20210616_HS_C_50ng_F2-1.raw	1	F5GY80|F5GY80_HUMAN;P07358|CO8B_HUMAN;F5H7G1|F5H7G1_HUMAN			FALSE
SGGGFSSGSAGIINYQR	67.39	1656.79	17	4.4	829.404	2	18.1265	199000	2550000	3728	20210616_HS_C_50ng_F3-3.raw	3	#CONTAM#cont|000132|;#CONTAM#cont|000135|;#CONTAM#cont|000134|;P04264|K2C1_HUMAN			FALSE
SGIPIVTSPYQIHFTK	75.98	1786.96	16	1	596.662	3	24.0466	4980000	31200000	5761	20210616_HS_C_50ng_F2-2.raw	7	P01024|CO3_HUMAN			FALSE
SGLSTGWTQLSK	49.99	1263.65	12	1.1	632.831	2	18.7591	6960000	41500000	3827	20210616_HS_C_50ng_F3-1.raw	7	P04217|A1BG_HUMAN;M0R009|M0R009_HUMAN			FALSE
SGSDEVQVGQQR	53.24	1288.6	12	-0.2	645.308	2	5.0492	5510000	8850000	813	20210616_HS_C_50ng_F3-3.raw	31	P01024|CO3_HUMAN;M0QXZ3|M0QXZ3_HUMAN			FALSE
SGSSTASWIQNVDTK	65.74	1579.75	15	-0.6	790.881	2	18.0554	1500000	9940000	3623	20210616_HS_C_50ng_F3-1.raw	3	P04114|APOB_HUMAN			FALSE
SGTASVVC(+57.02)LLN(+0.98)NFYPR	72.79	1797.87	16	3.4	899.946	2	24.494	13700000	125000000	5565	20210616_HS_C_50ng_F4-2.raw	18	A0A5H1ZRQ3|A0A5H1ZRQ3_HUMAN;P01834|IGKC_HUMAN	Carbamidomethylation; Deamidation (NQ)	C8:Carbamidomethylation:1000.00;N11:Deamidation (NQ):17.01	FALSE
SGTASVVC(+57.02)LLNN(+0.98)FYPR	69.83	1797.87	16	4.1	899.947	2	24.3777	3410000	14400000	5751	20210616_HS_C_50ng_F4-1.raw	4	A0A5H1ZRQ3|A0A5H1ZRQ3_HUMAN;P01834|IGKC_HUMAN	Carbamidomethylation; Deamidation (NQ)	C8:Carbamidomethylation:1000.00;N12:Deamidation (NQ):17.01	FALSE
SGTASVVC(+57.02)LLNNFYPR	69.41	1796.89	16	-1	899.45	2	27.3141	13400000	96600000	6297	20210616_HS_C_50ng_F3-1.raw	17	A0A5H1ZRQ3|A0A5H1ZRQ3_HUMAN;P01834|IGKC_HUMAN	Carbamidomethylation	C8:Carbamidomethylation:1000.00	FALSE
SGTSASLAISGLR	54.13	1218.66	13	2.8	610.337	2	18.0863	3930000	22500000	3634	20210616_HS_C_50ng_F3-1.raw	8				FALSE
SHC(+57.02)IAEVEND(+21.98)EM(+15.99)PADLPSLAADFVESK	51.6	3011.31	27	4.6	753.839	4	25.9337	240000	1380000	5989	20210616_HS_C_50ng_F3-2.raw	1	A0A0C4DGB6|A0A0C4DGB6_HUMAN;P02768|ALBU_HUMAN;C9JKR2|C9JKR2_HUMAN;D6RHD5|D6RHD5_HUMAN;B7WNR0|B7WNR0_HUMAN;H0YA55|H0YA55_HUMAN	Carbamidomethylation; Sodium adduct; Oxidation (M)	C3:Carbamidomethylation:1000.00;D10:Sodium adduct:0.00;M12:Oxidation (M):1000.00	FALSE
SHC(+57.02)IAEVENDEM(+15.99)PAD(+21.98)LPSLAADFVESK	75.69	3011.31	27	-0.6	753.835	4	25.985	271000	2110000	5930	20210616_HS_C_50ng_F3-1.raw	1	A0A0C4DGB6|A0A0C4DGB6_HUMAN;P02768|ALBU_HUMAN;C9JKR2|C9JKR2_HUMAN;D6RHD5|D6RHD5_HUMAN;B7WNR0|B7WNR0_HUMAN;H0YA55|H0YA55_HUMAN	Carbamidomethylation; Oxidation (M); Sodium adduct	C3:Carbamidomethylation:1000.00;M12:Oxidation (M):1000.00;D15:Sodium adduct:6.65	FALSE
SHC(+57.02)IAEVENDEM(+15.99)PADLPSLAADFVESK	115.27	2989.33	27	0.9	997.452	3	28.1242	42000000	474000000	6160	20210616_HS_C_50ng_F3-1.raw	21	A0A0C4DGB6|A0A0C4DGB6_HUMAN;P02768|ALBU_HUMAN;C9JKR2|C9JKR2_HUMAN;D6RHD5|D6RHD5_HUMAN;B7WNR0|B7WNR0_HUMAN;H0YA55|H0YA55_HUMAN	Carbamidomethylation; Oxidation (M)	C3:Carbamidomethylation:1000.00	FALSE
SIAQYWLGC(+57.02)PAPGHL	56.91	1668.81	15	5.3	835.416	2	25.1579	241000	1960000	5746	20210616_HS_C_50ng_F3-1.raw	2	P04004|VTNC_HUMAN	Carbamidomethylation	C9:Carbamidomethylation:1000.00	FALSE
SIEVFGQFN(+0.98)GK	42.26	1225.6	11	0.1	613.806	2	20.1904	277000	3280000	4290	20210616_HS_C_50ng_F3-1.raw	3	P02748|CO9_HUMAN	Deamidation (NQ)	N9:Deamidation (NQ):26.31	FALSE
SISTAYLQWSSLK	42.46	1482.77	13	4.4	742.396	2	23.6006	46000	658000	5418	20210616_HS_C_50ng_F3-2.raw	2	A0A0C4DH38|HV551_HUMAN			FALSE
SKEFQLFSSPHGK	45.74	1490.75	13	-1	497.924	3	17.5031	798000	3580000	3291	20210616_HS_C_50ng_F1-1.raw	2	P02787|TRFE_HUMAN			FALSE
SLDFTELDVAAEK	56.74	1436.7	13	2.1	719.361	2	22.1207	2340000	21800000	4896	20210616_HS_C_50ng_F3-1.raw	4	P01019|ANGT_HUMAN			FALSE
SLDLDSIIAEVK	61.15	1301.71	12	1.4	651.862	2	26.18	1350000	9660000	5970	20210616_HS_C_50ng_F3-1.raw	3	#CONTAM#cont|000132|;#CONTAM#cont|000135|;#CONTAM#cont|000134|;P04264|K2C1_HUMAN			FALSE
SLGEC(+57.02)C(+57.02)DVEDSTTC(+57.02)FNAK	92.28	2091.82	18	-0.2	1046.92	2	16.9422	1310000	11000000	3244	20210616_HS_C_50ng_F4-2.raw	6	P02774|VTDB_HUMAN;D6RF35|D6RF35_HUMAN	Carbamidomethylation; Carbamidomethylation; Carbamidomethylation	C5:Carbamidomethylation:1000.00;C6:Carbamidomethylation:1000.00;C14:Carbamidomethylation:1000.00	FALSE
SLHTLFGDK	67.46	1016.53	9	-2.1	509.271	2	15.1366	196000000	1390000000	2899	20210616_HS_C_50ng_F1-1.raw	86	A0A0C4DGB6|A0A0C4DGB6_HUMAN;A0A087WWT3|A0A087WWT3_HUMAN;P02768|ALBU_HUMAN;H7C013|H7C013_HUMAN			FALSE
SLHTLFGDKLC(+57.02)TVATLR	79.35	1931.03	17	1.8	483.766	4	23.6199	238000	2450000	4729	20210616_HS_C_50ng_F1-2.raw	4	A0A0C4DGB6|A0A0C4DGB6_HUMAN;A0A087WWT3|A0A087WWT3_HUMAN;P02768|ALBU_HUMAN;H7C013|H7C013_HUMAN	Carbamidomethylation	C11:Carbamidomethylation:1000.00	FALSE
SLN(+0.98)NQ(+0.98)FASFIDK	38.08	1384.65	12	-8.8	693.327	2	22.2921	95600	620000	5050	20210616_HS_C_50ng_F3-3.raw	1	#CONTAM#cont|000132|;#CONTAM#cont|000135|;#CONTAM#cont|000134|;P04264|K2C1_HUMAN	Deamidation (NQ); Deamidation (NQ)	N3:Deamidation (NQ):0.00;Q5:Deamidation (NQ):0.00	FALSE
SLNNQFASFIDK	54.99	1382.68	12	1.5	692.35	2	21.9989	4230000	34300000	4867	20210616_HS_C_50ng_F3-1.raw	7	#CONTAM#cont|000132|;#CONTAM#cont|000135|;#CONTAM#cont|000134|;P04264|K2C1_HUMAN			FALSE
SLPEGVAN(+0.98)GIEVYSTK	46.32	1663.83	16	3.7	832.926	2	19.6214	116000	1060000	4009	20210616_HS_C_50ng_F4-2.raw	2	E7ET33|E7ET33_HUMAN;A0A087WW43|A0A087WW43_HUMAN;Q06033|ITIH3_HUMAN	Deamidation (NQ)		FALSE
SLPVSDSVLSGFEQR	61.57	1619.82	15	5.4	810.919	2	22.8676	1000000	8960000	5135	20210616_HS_C_50ng_F3-1.raw	4	P07360|CO8G_HUMAN			FALSE
SLVNLGGSK	38.75	873.492	9	0.4	437.754	2	10.1477	512000	685000	2176	20210616_HS_C_50ng_F2-3.raw	3	#CONTAM#cont|000132|;#CONTAM#cont|000135|;#CONTAM#cont|000134|;P04264|K2C1_HUMAN			FALSE
SLWDFLK	43.35	907.48	7	2.1	454.748	2	25.8345	118000	686000	6131	20210616_HS_C_50ng_F2-2.raw	2	P04114|APOB_HUMAN			FALSE
SNLDED(+21.98)IIAEENIVSR	66.26	1837.87	16	-0.5	613.629	3	22.0814	519000	7670000	4676	20210616_HS_C_50ng_F4-1.raw	4	P01024|CO3_HUMAN	Sodium adduct	D6:Sodium adduct:24.44	FALSE
SNLDEDIIAEENIVSR	73.36	1815.88	16	4	908.953	2	22.1776	23900000	272000000	4949	20210616_HS_C_50ng_F3-1.raw	23	P01024|CO3_HUMAN			FALSE
SPAFTDLHLR	54.22	1155.6	10	3.8	578.811	2	19.1042	630000	4420000	3661	20210616_HS_C_50ng_F1-1.raw	3	P04114|APOB_HUMAN			FALSE
SPDVIN(+0.98)GSPISQK	58.83	1341.68	13	-1.3	671.845	2	15.2001	7280000	26100000	2930	20210616_HS_C_50ng_F3-3.raw	15	A0A0D9SG88|A0A0D9SG88_HUMAN;P08603|CFAH_HUMAN;Q5TFM2|Q5TFM2_HUMAN	Deamidation (NQ)	N6:Deamidation (NQ):26.50	FALSE
SPDVINGSPISQK	59.13	1340.69	13	1.3	671.355	2	14.5157			2773	20210616_HS_C_50ng_F3-3.raw	2	A0A0D9SG88|A0A0D9SG88_HUMAN;P08603|CFAH_HUMAN;Q5TFM2|Q5TFM2_HUMAN			FALSE
SPEQQETVLDGNLIIR	67.66	1810.94	16	4.3	906.482	2	22.0898	1380000	13300000	4891	20210616_HS_C_50ng_F3-1.raw	9	Q14624|ITIH4_HUMAN;B7ZKJ8|B7ZKJ8_HUMAN;H7C0L5|H7C0L5_HUMAN			FALSE
SPQELLC(+57.02)GASLISDR	53.8	1644.81	15	3.9	549.281	3	22.1948	101000	1170000	4946	20210616_HS_C_50ng_F3-1.raw	2	P00734|THRB_HUMAN;E9PIT3|E9PIT3_HUMAN	Carbamidomethylation	C7:Carbamidomethylation:1000.00	FALSE
SPVGVQPILN(+0.98)EHTFC(+57.02)AGM(+15.99)SK	53.37	2188.03	20	1.8	730.352	3	20.7223			4909	20210616_HS_C_50ng_F2-2.raw	3	P00738|HPT_HUMAN;J3QLC9|J3QLC9_HUMAN;A0A087WU08|A0A087WU08_HUMAN;H0Y300|H0Y300_HUMAN;A0A0C4DGL8|A0A0C4DGL8_HUMAN;J3QR68|J3QR68_HUMAN	Deamidation (NQ); Carbamidomethylation; Oxidation (M)	N10:Deamidation (NQ):0.00;C15:Carbamidomethylation:1000.00;M18:Oxidation (M):1000.00	FALSE
SPVGVQPILNE(+21.98)HTFC(+57.02)AGM(+15.99)SK	49.16	2209.03	20	3.2	737.352	3	20.7846	675000	6390000	4962	20210616_HS_C_50ng_F2-1.raw	3	P00738|HPT_HUMAN;J3QLC9|J3QLC9_HUMAN;A0A087WU08|A0A087WU08_HUMAN;H0Y300|H0Y300_HUMAN;A0A0C4DGL8|A0A0C4DGL8_HUMAN;J3QR68|J3QR68_HUMAN	Sodium adduct; Carbamidomethylation; Oxidation (M)	E11:Sodium adduct:24.63;C15:Carbamidomethylation:1000.00;M18:Oxidation (M):1000.00	FALSE
SPVGVQPILNEHTFC(+57.02)AGM(+15.99)SK	70.23	2187.05	20	-5.3	730.019	3	20.7854	19700000	182000000	4971	20210616_HS_C_50ng_F2-1.raw	17	P00738|HPT_HUMAN;J3QLC9|J3QLC9_HUMAN;A0A087WU08|A0A087WU08_HUMAN;H0Y300|H0Y300_HUMAN;A0A0C4DGL8|A0A0C4DGL8_HUMAN;J3QR68|J3QR68_HUMAN	Carbamidomethylation; Oxidation (M)	C15:Carbamidomethylation:1000.00	FALSE
SQYEQLAEQNR	40.83	1364.63	11	-0.4	683.323	2	6.8351	299000	1490000	1238	20210616_HS_C_50ng_F3-3.raw	2	#CONTAM#cont|000133|;#CONTAM#cont|000131|;P13645|K1C10_HUMAN;#CONTAM#cont|000129|;#CONTAM#cont|000136|;#CONTAM#cont|000122|;#CONTAM#cont|000130|			FALSE
SSALDM(+15.99)ENFR	53.79	1184.51	10	5	593.267	2	8.4507	2290000	3170000	1865	20210616_HS_C_50ng_F2-2.raw	2	Q5T985|Q5T985_HUMAN;Q5T987|Q5T987_HUMAN;P19823|ITIH2_HUMAN	Oxidation (M)		FALSE
SSEDPNEDIVER	41.32	1388.61	12	2.7	695.312	2	6.86	298000	1520000	1250	20210616_HS_C_50ng_F3-3.raw	1				FALSE
SSGLVSNAPGVQIR	47.96	1383.75	14	5.1	692.884	2	17.5784	120000	1780000	3558	20210616_HS_C_50ng_F3-3.raw	3				FALSE
SSGSLLN(+0.98)NAIK	51.26	1103.58	11	5.6	552.803	2	16.4665	1340000	4940000	3687	20210616_HS_C_50ng_F2-3.raw	4	P01023|A2MG_HUMAN;P20742|PZP_HUMAN	Deamidation (NQ)	N7:Deamidation (NQ):14.02	FALSE
SSGSLLNN(+0.98)AIK	54.03	1103.58	11	7.4	552.803	2	16.5099	716000	3960000	3665	20210616_HS_C_50ng_F2-2.raw	2	P01023|A2MG_HUMAN;P20742|PZP_HUMAN	Deamidation (NQ)	N8:Deamidation (NQ):0.00	FALSE
SSGSLLNNAIK	71.68	1102.6	11	3	552.308	2	15.3215	17600000	125000000	3284	20210616_HS_C_50ng_F2-2.raw	10	P01023|A2MG_HUMAN;P20742|PZP_HUMAN			FALSE
SSLSVPYVIVPLK	56.83	1400.83	13	2.4	701.423	2	25.8005	10100000	92200000	6122	20210616_HS_C_50ng_F2-2.raw	14	P01024|CO3_HUMAN			FALSE
SSNLIILEEHLK	58.19	1394.78	12	0.9	465.933	3	21.7426	850000	6440000	4303	20210616_HS_C_50ng_F1-3.raw	3	P08603|CFAH_HUMAN			FALSE
SSSNEEVM(+15.99)FLTVQVK	66.47	1712.83	15	6.8	857.428	2	21.564	1960000	22200000	4719	20210616_HS_C_50ng_F3-1.raw	5	P01023|A2MG_HUMAN;F8W7L3|F8W7L3_HUMAN	Oxidation (M)		FALSE
STSESTAALGC(+57.02)LVK	67.98	1422.7	14	4.3	712.362	2	18.1942	44100000	288000000	4133	20210616_HS_C_50ng_F2-2.raw	27	P01859|IGHG2_HUMAN;A0A286YEY4|A0A286YEY4_HUMAN	Carbamidomethylation	C11:Carbamidomethylation:1000.00	FALSE
STSGGTAALGC(+57.02)LVK	65.53	1320.67	14	1.3	661.343	2	17.5385	78700000	615000000	4131	20210616_HS_C_50ng_F2-2.raw	46	P01857|IGHG1_HUMAN;A0A0A0MS08|A0A0A0MS08_HUMAN;A0A0A0MS07|A0A0A0MS07_HUMAN	Carbamidomethylation	C11:Carbamidomethylation:1000.00	FALSE
STSTAYM(+15.99)ELSSLR	44.7	1460.68	13	1.2	731.349	2	18.757	150000	1770000	3829	20210616_HS_C_50ng_F3-1.raw	2		Oxidation (M)		FALSE
SVGFHLPSR	40.6	998.53	9	-0.7	500.272	2	17.2048	187000	1030000	3194	20210616_HS_C_50ng_F1-1.raw	3	P04114|APOB_HUMAN			FALSE
SVIPSD(+21.98)GPSVAC(+57.02)VK	44.15	1436.69	14	2.1	719.356	2	17.406	876000	8540000	3504	20210616_HS_C_50ng_F3-3.raw	3	F8WCI6|F8WCI6_HUMAN;P02787|TRFE_HUMAN;F8WEK9|F8WEK9_HUMAN;C9JB55|C9JB55_HUMAN	Sodium adduct; Carbamidomethylation	D6:Sodium adduct:37.54;C12:Carbamidomethylation:1000.00	FALSE
SVIPSDGPSVAC(+57.02)VK	65.32	1414.71	14	1	708.364	2	17.5084	18200000	119000000	3373	20210616_HS_C_50ng_F4-2.raw	27	F8WCI6|F8WCI6_HUMAN;P02787|TRFE_HUMAN;F8WEK9|F8WEK9_HUMAN;C9JB55|C9JB55_HUMAN	Carbamidomethylation	C12:Carbamidomethylation:1000.00	FALSE
SVLGQLGITK	49.49	1014.61	10	3.1	508.312	2	19.5857	47900000	739000000	4581	20210616_HS_C_50ng_F2-2.raw	25				FALSE
SVPM(+15.99)VPPGIK	41.46	1039.57	10	-0.3	520.795	2	16.0602	684000	1660000	3619	20210616_HS_C_50ng_F2-3.raw	4		Oxidation (M)		FALSE
SVSDGIAALDLNAVANK	61.06	1656.87	17	0.8	829.442	2	22.2761	830000	8850000	4750	20210616_HS_C_50ng_F4-1.raw	3	P04114|APOB_HUMAN			FALSE
SVSLPSLDPASAK	55.42	1270.68	13	0.8	636.346	2	19.7171	1320000	13200000	4172	20210616_HS_C_50ng_F3-2.raw	3	A8MUN2|A8MUN2_HUMAN;P04114|APOB_HUMAN			FALSE
SYSC(+57.02)QVTHEGSTVEK	54.25	1710.75	15	7.3	571.262	3	5.9668	16800000	25300000	1225	20210616_HS_C_50ng_F2-2.raw	5	A0A0B4J231|A0A0B4J231_HUMAN;B9A064|IGLL5_HUMAN	Carbamidomethylation	C4:Carbamidomethylation:1000.00	FALSE
SYTVAIAGYALAQM(+15.99)GR	40.31	1686.84	16	3.5	844.43	2	22.0712	890000	6800000	4884	20210616_HS_C_50ng_F3-1.raw	4	M0R0Q9|M0R0Q9_HUMAN;P01024|CO3_HUMAN	Oxidation (M)		FALSE
TAAENDFVTLK	62.64	1207.61	11	2.3	604.813	2	16.8158	1310000	7650000	3712	20210616_HS_C_50ng_F2-2.raw	7	P35908|K22E_HUMAN			FALSE
TAGWNIPM(+15.99)GLLYNK	58.55	1592.8	14	4.3	797.412	2	24.6785	16600000	159000000	5848	20210616_HS_C_50ng_F3-1.raw	23	H7C5E8|H7C5E8_HUMAN;P02787|TRFE_HUMAN	Oxidation (M)		FALSE
TC(+57.02)PKPDDLPFSTVVPLK	52.72	1913	17	0.9	638.673	3	24.0312	1240000	9830000	5756	20210616_HS_C_50ng_F2-2.raw	3	J3QRN2|J3QRN2_HUMAN;P02749|APOH_HUMAN	Carbamidomethylation	C2:Carbamidomethylation:1000.00	FALSE
TC(+57.02)VAD(+21.98)ESAENC(+57.02)DK	38.86	1519.55	13	0.3	760.784	2	2.9165	957000	1330000	630	20210616_HS_C_50ng_F3-2.raw	3	A0A0C4DGB6|A0A0C4DGB6_HUMAN;A0A087WWT3|A0A087WWT3_HUMAN;P02768|ALBU_HUMAN;H7C013|H7C013_HUMAN	Carbamidomethylation; Sodium adduct; Carbamidomethylation	C2:Carbamidomethylation:1000.00;D5:Sodium adduct:0.00;C11:Carbamidomethylation:1000.00	FALSE
TC(+57.02)VADE(+21.98)SAENC(+57.02)DK	59.01	1519.55	13	2.7	760.786	2	4.6027	1460000	4470000	779	20210616_HS_C_50ng_F3-3.raw	10	A0A0C4DGB6|A0A0C4DGB6_HUMAN;A0A087WWT3|A0A087WWT3_HUMAN;P02768|ALBU_HUMAN;H7C013|H7C013_HUMAN	Carbamidomethylation; Sodium adduct; Carbamidomethylation	C2:Carbamidomethylation:1000.00;E6:Sodium adduct:9.42;C11:Carbamidomethylation:1000.00	FALSE
TC(+57.02)VADESAEN(+0.98)C(+57.02)DK	50.97	1498.56	13	8.7	750.291	2	3.4797	2300000	3930000	533	20210616_HS_C_50ng_F3-2.raw	6	A0A0C4DGB6|A0A0C4DGB6_HUMAN;A0A087WWT3|A0A087WWT3_HUMAN;P02768|ALBU_HUMAN;H7C013|H7C013_HUMAN	Carbamidomethylation; Deamidation (NQ); Carbamidomethylation	C2:Carbamidomethylation:1000.00;C11:Carbamidomethylation:1000.00	FALSE
TC(+57.02)VADESAENC(+57.02)DK	93.07	1497.57	13	-3.4	749.79	2	3.2504	11300000	34700000	548	20210616_HS_C_50ng_F3-1.raw	34	A0A0C4DGB6|A0A0C4DGB6_HUMAN;A0A087WWT3|A0A087WWT3_HUMAN;P02768|ALBU_HUMAN;H7C013|H7C013_HUMAN	Carbamidomethylation; Carbamidomethylation	C2:Carbamidomethylation:1000.00;C11:Carbamidomethylation:1000.00	FALSE
TDAPDLPEENQAR	42.72	1454.66	13	4.7	728.342	2	8.2416	331000	1970000	1601	20210616_HS_C_50ng_F3-3.raw	2	P01031|CO5_HUMAN			FALSE
TEDSSSFLIDK	43.22	1240.58	11	0.3	621.299	2	15.35	122000	510000	2934	20210616_HS_C_50ng_F3-2.raw	1				FALSE
TEDTIFLR	53.06	993.513	8	0.9	497.764	2	17.2457	24200000	207000000	3892	20210616_HS_C_50ng_F2-2.raw	16	P02763|A1AG1_HUMAN;P19652|A1AG2_HUMAN			FALSE
TEGDGVYTLN(+0.98)DK	32.13	1311.58	12	6.8	656.803	2	8.3484	1210000	2620000	1731	20210616_HS_C_50ng_F3-2.raw	2	P00738|HPT_HUMAN;J3QLC9|J3QLC9_HUMAN;H0Y300|H0Y300_HUMAN;A0A0C4DGL8|A0A0C4DGL8_HUMAN;J3KRH2|J3KRH2_HUMAN;J3QR68|J3QR68_HUMAN	Deamidation (NQ)		FALSE
TEGDGVYTLN(+0.98)NEK	41.39	1439.64	13	9.2	720.835	2	9.0957	491000	275000	1735	20210616_HS_C_50ng_F3-2.raw	1	P00738|HPT_HUMAN;J3QLC9|J3QLC9_HUMAN;H3BS21|H3BS21_HUMAN;J3KRH2|J3KRH2_HUMAN	Deamidation (NQ)	N10:Deamidation (NQ):12.28	FALSE
TEGDGVYTLNDK	59.48	1310.6	12	-1	656.306	2	7.4328	21900000	202000000	1510	20210616_HS_C_50ng_F3-1.raw	39	P00738|HPT_HUMAN;J3QLC9|J3QLC9_HUMAN;H0Y300|H0Y300_HUMAN;A0A0C4DGL8|A0A0C4DGL8_HUMAN;J3KRH2|J3KRH2_HUMAN;J3QR68|J3QR68_HUMAN			FALSE
TEGDGVYTLNNEK	55.42	1438.66	13	-1.2	720.335	2	8.0224	25400000	45800000	1535	20210616_HS_C_50ng_F3-3.raw	10	P00738|HPT_HUMAN;J3QLC9|J3QLC9_HUMAN;H3BS21|H3BS21_HUMAN;J3KRH2|J3KRH2_HUMAN			FALSE
TEHPFTVEEFVLPK	67.79	1671.85	14	1.8	558.292	3	24.1568	7420000	66700000	5779	20210616_HS_C_50ng_F2-2.raw	11	P01023|A2MG_HUMAN			FALSE
TEIDKPSQM(+15.99)QVTDVQDNSISVK	39.52	2477.2	22	3.2	826.742	3	17.1586	141000	2070000	3434	20210616_HS_C_50ng_F3-3.raw	3	P02751|FINC_HUMAN;H0Y7Z1|H0Y7Z1_HUMAN	Oxidation (M)		FALSE
TEQWSTLPPETK	61.67	1415.69	12	2.8	708.856	2	16.9945	2790000	6410000	3417	20210616_HS_C_50ng_F3-1.raw	6	A0A140TA32|A0A140TA32_HUMAN;A0A140TA29|A0A140TA29_HUMAN;P0C0L4|CO4A_HUMAN;P0C0L5|CO4B_HUMAN;A0A0G2JPR0|A0A0G2JPR0_HUMAN;A0A140TA49|A0A140TA49_HUMAN;F5GXS0|F5GXS0_HUMAN;A0A140TA44|A0A140TA44_HUMAN;A0A3B3ISA6|A0A3B3ISA6_HUMAN;A0A0G2JL54|A0A0G2JL54_HUMAN			FALSE
TEVIPPLIENR	50.64	1279.71	11	3.9	640.867	2	21.0298	3090000	30600000	4619	20210616_HS_C_50ng_F3-3.raw	9	P04114|APOB_HUMAN			FALSE
TEVNVLPGAK	47.93	1026.57	10	0.9	514.293	2	11.6644	2410000	5120000	2537	20210616_HS_C_50ng_F2-1.raw	5	Q5T985|Q5T985_HUMAN;Q5T987|Q5T987_HUMAN;P19823|ITIH2_HUMAN			FALSE
TEVSSNHVLIYLDK	67.43	1616.84	14	4.1	539.957	3	20.0243	5330000	29800000	4714	20210616_HS_C_50ng_F2-2.raw	7	P01023|A2MG_HUMAN			FALSE
TFTC(+57.02)TAAYPESK	57.25	1374.61	12	2.4	688.315	2	13.529	11400000	23400000	2740	20210616_HS_C_50ng_F3-1.raw	14	P01876|IGHA1_HUMAN;A0A286YEY1|A0A286YEY1_HUMAN	Carbamidomethylation	C4:Carbamidomethylation:1000.00	FALSE
TFYEPGEEITYSC(+57.02)KPGYVSR	39.76	2382.08	20	2.7	795.037	3	20.2576	159000	1560000	4786	20210616_HS_C_50ng_F2-2.raw	2	J3QRN2|J3QRN2_HUMAN;P02749|APOH_HUMAN	Carbamidomethylation	C13:Carbamidomethylation:1000.00	FALSE
TGISPLALIK	52.08	1011.63	10	3.8	506.826	2	23.2677	1910000	11700000	5576	20210616_HS_C_50ng_F2-2.raw	3	A8MUN2|A8MUN2_HUMAN;P04114|APOB_HUMAN			FALSE
TGLLLLSDPDK	51.01	1170.65	11	5	586.335	2	21.0907	355000	3820000	4563	20210616_HS_C_50ng_F3-1.raw	4	Q14624|ITIH4_HUMAN;B7ZKJ8|B7ZKJ8_HUMAN;H7C0L5|H7C0L5_HUMAN			FALSE
TGLQEVEVK	52.67	1001.54	9	1	501.777	2	9.7466	14200000	58000000	2054	20210616_HS_C_50ng_F2-2.raw	22	P01024|CO3_HUMAN			FALSE
THLAPYSDELR	62.99	1300.64	11	-0.9	651.327	2	14.9869	19200000	96100000	2777	20210616_HS_C_50ng_F1-3.raw	40	F8W696|F8W696_HUMAN;P02647|APOA1_HUMAN			FALSE
THLPEVFLSK	57.01	1169.64	10	4.1	585.832	2	19.8367	1420000	8970000	3853	20210616_HS_C_50ng_F1-3.raw	3	P02774|VTDB_HUMAN;D6RF35|D6RF35_HUMAN			FALSE
TIYTPGSTVLYR	59.69	1369.72	12	3.3	685.872	2	19.495	11600000	113000000	4554	20210616_HS_C_50ng_F2-2.raw	19	P01024|CO3_HUMAN			FALSE
TLADLTLLDSPIK	61.75	1398.8	13	-3.7	700.403	2	25.239	1440000	9290000	5757	20210616_HS_C_50ng_F3-1.raw	3	P04114|APOB_HUMAN			FALSE
TLEAQLTPR	48.7	1027.57	9	1.5	514.791	2	12.3701	3760000	8580000	2685	20210616_HS_C_50ng_F2-1.raw	5	P05546|HEP2_HUMAN			FALSE
TLLPVSKPEIR	46.04	1251.76	11	0.3	418.259	3	18.6609	94800	744000	3563	20210616_HS_C_50ng_F1-1.raw	2	P01031|CO5_HUMAN			FALSE
TLLSNLEEAK	51.27	1116.6	10	4.5	559.311	2	18.8973	3630000	20500000	4342	20210616_HS_C_50ng_F2-2.raw	3	H0YLK8|H0YLK8_HUMAN;P10909|CLUS_HUMAN;E7ETB4|E7ETB4_HUMAN;E7ERK6|E7ERK6_HUMAN			FALSE
TLM(+15.99)FGSYLDDEK	55.93	1433.64	12	3.2	717.829	2	20.5323	4660000	27200000	4387	20210616_HS_C_50ng_F3-1.raw	10	P19652|A1AG2_HUMAN	Oxidation (M)		FALSE
TLNQPDSQLQLTTGN(+0.98)GLFLSEGLK	53.83	2574.32	24	2.2	859.115	3	26.3725	725000	2700000	5908	20210616_HS_C_50ng_F4-1.raw	3		Deamidation (NQ)	N15:Deamidation (NQ):61.30	FALSE
TLNQPDSQLQLTTGNGLFLSEGLK	52.61	2573.33	24	0.6	858.786	3	25.9865	1730000	6660000	5908	20210616_HS_C_50ng_F4-1.raw	3				FALSE
TLQGIPQM(+15.99)IGEVIR	47.51	1569.85	14	2.6	524.294	3	23.3381	1190000	6970000	5276	20210616_HS_C_50ng_F3-1.raw	4	P04114|APOB_HUMAN	Oxidation (M)		FALSE
TM(+15.99)QALPYSTVGNSN(+0.98)NYLHLSVLR	50.19	2594.28	23	4.5	865.771	3	24.963	99500	804000	5704	20210616_HS_C_50ng_F3-1.raw	1	P01024|CO3_HUMAN	Oxidation (M); Deamidation (NQ)	M2:Oxidation (M):1000.00;N14:Deamidation (NQ):0.00	FALSE
TM(+15.99)QALPYSTVGNSNNYLHLSVLR	40.19	2593.3	23	2.6	865.442	3	24.7012	150000	1560000	5971	20210616_HS_C_50ng_F2-1.raw	2	P01024|CO3_HUMAN	Oxidation (M)		FALSE
TNAENEFVTIK	54.34	1264.63	11	4.2	633.325	2	16.6951	6540000	33600000	3683	20210616_HS_C_50ng_F2-2.raw	7	#CONTAM#cont|000132|;#CONTAM#cont|000135|;#CONTAM#cont|000134|;P04264|K2C1_HUMAN			FALSE
TNFDNDIALVR	44.97	1276.64	11	0.9	639.328	2	19.6134	613000	5680000	4137	20210616_HS_C_50ng_F3-2.raw	2				FALSE
TNLESILSYPK	52.59	1263.67	11	0.6	632.843	2	22.3094	8370000	31300000	5394	20210616_HS_C_50ng_F2-1.raw	5	H9KV48|H9KV48_HUMAN;P05155|IC1_HUMAN;E9PGN7|E9PGN7_HUMAN			FALSE
TNQVNSGGVLLR	38.59	1256.68	12	-0.4	629.349	2	13.5117	1050000	3070000	2560	20210616_HS_C_50ng_F3-2.raw	4	P02747|C1QC_HUMAN			FALSE
TPE(+21.98)VTC(+57.02)VVVDVSHEDPEVK	50.33	2160	19	4.2	721.011	3	20.8936	435000	3820000	4991	20210616_HS_C_50ng_F2-1.raw	1	P01857|IGHG1_HUMAN;A0A0A0MS08|A0A0A0MS08_HUMAN;A0A0A0MS07|A0A0A0MS07_HUMAN	Sodium adduct; Carbamidomethylation	E3:Sodium adduct:0.00;C6:Carbamidomethylation:1000.00	FALSE
TPEVTC(+57.02)VVVD(+21.98)VSHEDPEVK	56.5	2160	19	4.5	721.011	3	20.9161	254000	2730000	4960	20210616_HS_C_50ng_F2-2.raw	3	P01857|IGHG1_HUMAN;A0A0A0MS08|A0A0A0MS08_HUMAN;A0A0A0MS07|A0A0A0MS07_HUMAN	Carbamidomethylation; Sodium adduct	C6:Carbamidomethylation:1000.00;D10:Sodium adduct:9.00	FALSE
TPEVTC(+57.02)VVVDVSHEDPEVK	73.68	2138.02	19	2.3	713.682	3	20.8051	22600000	174000000	4485	20210616_HS_C_50ng_F3-1.raw	24	P01857|IGHG1_HUMAN;A0A0A0MS08|A0A0A0MS08_HUMAN;A0A0A0MS07|A0A0A0MS07_HUMAN	Carbamidomethylation	C6:Carbamidomethylation:1000.00	FALSE
TPLTATLSK	72.89	930.539	9	-0.9	466.276	2	10.6105	45800000	116000000	2181	20210616_HS_C_50ng_F2-2.raw	12	P01876|IGHA1_HUMAN;A0A286YEY1|A0A286YEY1_HUMAN			FALSE
TPSAAYLWVGTGASEAEK	64.13	1836.89	18	5.3	919.457	2	21.5013	250000	3130000	4771	20210616_HS_C_50ng_F3-2.raw	3	A0A0A0MS51|A0A0A0MS51_HUMAN;P06396|GELS_HUMAN;A0A0A0MT01|A0A0A0MT01_HUMAN			FALSE
TPSC(+57.02)GDIC(+57.02)NFPPK	37.65	1491.65	13	-0.2	746.831	2	17.2659	134000	585000	3468	20210616_HS_C_50ng_F3-3.raw	3	P04003|C4BPA_HUMAN	Carbamidomethylation; Carbamidomethylation	C4:Carbamidomethylation:1000.00;C8:Carbamidomethylation:1000.00	FALSE
TQFNNNEYSQDLDAYNTK	82.1	2163.93	18	-0.1	1082.97	2	17.9838	1370000	10700000	3449	20210616_HS_C_50ng_F4-1.raw	6	P04114|APOB_HUMAN			FALSE
TSDQIHFFFAK	50.08	1339.66	11	3	447.561	3	22.1719	653000	3720000	4399	20210616_HS_C_50ng_F1-3.raw	3	P01008|ANT3_HUMAN;Q8TCE1|Q8TCE1_HUMAN			FALSE
TSESGELHGLTTEEEFVEGIYK	53.18	2454.14	22	3.4	819.058	3	24.214	677000	4510000	5800	20210616_HS_C_50ng_F2-2.raw	2	P02766|TTHY_HUMAN;A0A087WT59|A0A087WT59_HUMAN			FALSE
TSNFNAAISLK	57.81	1164.61	11	0	583.314	2	18.0797	175000	1240000	4120	20210616_HS_C_50ng_F2-2.raw	1	P02748|CO9_HUMAN			FALSE
TSQNSELNNM(+15.99)QDLVEDYK	39.55	2142.94	18	-0.1	715.32	3	17.4048	110000	1330000	3363	20210616_HS_C_50ng_F4-2.raw	2	P35908|K22E_HUMAN	Oxidation (M)		FALSE
TSSFALNLPTLPEVK	53.02	1615.88	15	3.5	808.951	2	26.4383	1440000	10400000	6017	20210616_HS_C_50ng_F3-1.raw	4	P04114|APOB_HUMAN			FALSE
TSTSEEVC(+57.02)SFYLK	43.81	1549.7	13	3.1	775.858	2	19.2539	372000	3880000	4037	20210616_HS_C_50ng_F3-2.raw	3	P01031|CO5_HUMAN	Carbamidomethylation	C8:Carbamidomethylation:1000.00	FALSE
TTNIQGINLLFSSR	68.28	1562.84	14	4.8	782.432	2	24.8438	1230000	7330000	5666	20210616_HS_C_50ng_F3-1.raw	3	A0A140TA32|A0A140TA32_HUMAN;A0A140TA29|A0A140TA29_HUMAN;P0C0L4|CO4A_HUMAN;P0C0L5|CO4B_HUMAN;A0A0G2JPR0|A0A0G2JPR0_HUMAN;A0A140TA49|A0A140TA49_HUMAN;F5GXS0|F5GXS0_HUMAN;A0A140TA44|A0A140TA44_HUMAN;A0A0G2JL54|A0A0G2JL54_HUMAN			FALSE
TTPPM(+15.99)LDSDGSFFLYSK	62.49	1920.88	17	0.4	961.448	2	23.5149	26400000	148000000	5279	20210616_HS_C_50ng_F4-1.raw	19	P01859|IGHG2_HUMAN;A0A286YEY4|A0A286YEY4_HUMAN	Oxidation (M)		FALSE
TTPPVLDSD(+21.98)GSFFLYSK	58.27	1894.9	17	-0.6	632.639	3	24.7881	1170000	6980000	5508	20210616_HS_C_50ng_F4-1.raw	5	P01857|IGHG1_HUMAN;A0A0A0MS08|A0A0A0MS08_HUMAN;A0A0A0MS07|A0A0A0MS07_HUMAN	Sodium adduct	D9:Sodium adduct:14.04	FALSE
TTPPVLDSDGSFFLYSK	66.41	1872.91	17	4	937.468	2	24.4353	43600000	269000000	5603	20210616_HS_C_50ng_F4-1.raw	36	P01857|IGHG1_HUMAN;A0A0A0MS08|A0A0A0MS08_HUMAN;A0A0A0MS07|A0A0A0MS07_HUMAN			FALSE
TTPPVLDSDGSFFLYSR	38.52	1900.92	17	4.9	951.472	2	25.1941	718000	5040000	5752	20210616_HS_C_50ng_F3-1.raw	4				FALSE
TVAAC(+57.02)NLPIVR	52.76	1212.66	11	2.2	607.341	2	18.4117	2310000	17400000	3731	20210616_HS_C_50ng_F3-1.raw	7	P02760|AMBP_HUMAN	Carbamidomethylation	C5:Carbamidomethylation:1000.00	FALSE
TVAAPSVFIFPPSD(+21.98)EQLK	52.08	1967	18	1.1	656.675	3	26.0291	17200000	90400000	5956	20210616_HS_C_50ng_F4-1.raw	12	A0A5H1ZRQ3|A0A5H1ZRQ3_HUMAN;P01834|IGKC_HUMAN	Sodium adduct	D14:Sodium adduct:8.14	FALSE
TVAAPSVFIFPPSDEQLK	71.55	1945.02	18	4.6	973.522	2	27.1846	188000000	1580000000	6279	20210616_HS_C_50ng_F4-2.raw	71	A0A5H1ZRQ3|A0A5H1ZRQ3_HUMAN;P01834|IGKC_HUMAN			FALSE
TVM(+15.99)VNIE(+21.98)NPEGIPVK	46.29	1676.84	15	5	559.957	3	20.4165	1230000	9460000	4358	20210616_HS_C_50ng_F3-1.raw	3	P01024|CO3_HUMAN	Oxidation (M); Sodium adduct	M3:Oxidation (M):1000.00;E7:Sodium adduct:28.64	FALSE
TVM(+15.99)VNIENPE(+21.98)GIPVK	40.37	1676.84	15	5.7	839.433	2	20.3748	168000	2100000	4411	20210616_HS_C_50ng_F3-3.raw	2	P01024|CO3_HUMAN	Oxidation (M); Sodium adduct	M3:Oxidation (M):1000.00;E10:Sodium adduct:5.77	FALSE
TVM(+15.99)VNIENPEGIPVK	62.31	1654.86	15	-3.8	828.434	2	20.4165	20000000	159000000	4341	20210616_HS_C_50ng_F3-1.raw	17	P01024|CO3_HUMAN	Oxidation (M)		FALSE
TVMVNIENPEGIPVK	61.92	1638.87	15	2.9	820.442	2	21.6005	305000	2940000	4737	20210616_HS_C_50ng_F3-1.raw	2	P01024|CO3_HUMAN			FALSE
TVQAVLTVPK	48.2	1054.64	10	0.9	528.328	2	17.5337	592000	2470000	3954	20210616_HS_C_50ng_F2-3.raw	3	P36955|PEDF_HUMAN			FALSE
TWYPEVPK	35.98	1018.51	8	1.3	510.264	2	18.7282	809000	4360000	4322	20210616_HS_C_50ng_F2-2.raw	2	P04003|C4BPA_HUMAN			FALSE
TYETTLE(+21.98)K	38.39	1005.46	8	4	503.741	2	5.9668	32200000	40100000	1688	20210616_HS_C_50ng_F2-2.raw	9	A0A0C4DGB6|A0A0C4DGB6_HUMAN;P02768|ALBU_HUMAN;C9JKR2|C9JKR2_HUMAN;D6RHD5|D6RHD5_HUMAN;B7WNR0|B7WNR0_HUMAN;H0YA55|H0YA55_HUMAN	Sodium adduct	E7:Sodium adduct:20.92	FALSE
TYETTLEK	46.07	983.481	8	0.1	492.748	2	11.948	169000000	803000000	2556	20210616_HS_C_50ng_F2-1.raw	83	A0A0C4DGB6|A0A0C4DGB6_HUMAN;P02768|ALBU_HUMAN;C9JKR2|C9JKR2_HUMAN;D6RHD5|D6RHD5_HUMAN;B7WNR0|B7WNR0_HUMAN;H0YA55|H0YA55_HUMAN			FALSE
TYFPHFDLSHGSAQVK	56.93	1832.88	16	1.8	459.229	4	21.3407	169000	1320000	4226	20210616_HS_C_50ng_F1-1.raw	2	P69905|HBA_HUMAN;G3V1N2|G3V1N2_HUMAN;A0A2R8Y7C0|A0A2R8Y7C0_HUMAN			FALSE
TYM(+15.99)LAFDVNDEK	61.74	1460.65	12	2.4	731.334	2	19.913	9320000	99600000	4090	20210616_HS_C_50ng_F4-2.raw	11	P02763|A1AG1_HUMAN	Oxidation (M)		FALSE
VAEGTQVLELPFK	57.78	1429.78	13	4.6	715.901	2	23.6407	3820000	34000000	5678	20210616_HS_C_50ng_F2-2.raw	9	P01008|ANT3_HUMAN			FALSE
VATVSLPR	38.28	841.502	8	-0.5	421.758	2	13.2516	65600000	424000000	2488	20210616_HS_C_50ng_F3-1.raw	28	#CONTAM#cont|000144|;#CONTAM#cont|000142|;#CONTAM#cont|000023|;#CONTAM#cont|000143|;#CONTAM#cont|000141|;#CONTAM#cont|000040|;#CONTAM#cont|000032|			FALSE
VC(+57.02)PFAGILEN(+0.98)GAVR	58.46	1502.76	14	2.2	752.386	2	23.266	2740000	16800000	5257	20210616_HS_C_50ng_F3-1.raw	6	J3QLI0|J3QLI0_HUMAN;J3QRN2|J3QRN2_HUMAN;P02749|APOH_HUMAN	Carbamidomethylation; Deamidation (NQ)	C2:Carbamidomethylation:1000.00	FALSE
VC(+57.02)PFAGILENGAVR	42.86	1501.77	14	1.8	751.894	2	23.6696	102000	1250000	5385	20210616_HS_C_50ng_F3-1.raw	1	J3QLI0|J3QLI0_HUMAN;J3QRN2|J3QRN2_HUMAN;P02749|APOH_HUMAN	Carbamidomethylation	C2:Carbamidomethylation:1000.00	FALSE
VD(+21.98)NALQSGNSQESVTEQDSK	39.15	2156.94	20	-0.7	719.988	3	13.9575	644000	1790000	2748	20210616_HS_C_50ng_F4-1.raw	5	A0A5H1ZRQ3|A0A5H1ZRQ3_HUMAN;P01834|IGKC_HUMAN	Sodium adduct	D2:Sodium adduct:7.40	FALSE
VDFTLSSER	43.86	1052.51	9	-0.3	527.265	2	15.8072	8410000	51800000	3455	20210616_HS_C_50ng_F2-3.raw	13	A0A140TA32|A0A140TA32_HUMAN;A0A140TA29|A0A140TA29_HUMAN;P0C0L4|CO4A_HUMAN;P0C0L5|CO4B_HUMAN;A0A0G2JPR0|A0A0G2JPR0_HUMAN;A0A140TA49|A0A140TA49_HUMAN;F5GXS0|F5GXS0_HUMAN;A0A140TA44|A0A140TA44_HUMAN;A0A0G2JL54|A0A0G2JL54_HUMAN			FALSE
VDLLNQEIEFLK	60.06	1459.79	12	0.1	730.903	2	25.9208	219000	2060000	5913	20210616_HS_C_50ng_F3-1.raw	3	P35908|K22E_HUMAN			FALSE
VDLSFSPSQSLPASHAHLR	65.13	2048.04	19	2.3	513.019	4	20.8928	5140000	42200000	4102	20210616_HS_C_50ng_F1-1.raw	7	P01023|A2MG_HUMAN			FALSE
VDN(+0.98)ALQSGNSQE(+21.98)SVTEQDSK	53.26	2157.93	20	0	720.316	3	6.1533	462000	1920000	1018	20210616_HS_C_50ng_F4-2.raw	1	A0A5H1ZRQ3|A0A5H1ZRQ3_HUMAN;P01834|IGKC_HUMAN	Deamidation (NQ); Sodium adduct	N3:Deamidation (NQ):8.58;E12:Sodium adduct:31.56	FALSE
VDNALQ(+0.98)SGN(+0.98)SQE(+21.98)SVTEQDSK	65.09	2158.91	20	-4.8	720.641	3	11.1523	57200	330000	2042	20210616_HS_C_50ng_F4-2.raw	2	A0A5H1ZRQ3|A0A5H1ZRQ3_HUMAN;P01834|IGKC_HUMAN	Deamidation (NQ); Deamidation (NQ); Sodium adduct	Q6:Deamidation (NQ):0.00;N9:Deamidation (NQ):0.00;E12:Sodium adduct:25.55	FALSE
VDNALQ(+0.98)SGNSQ(+0.98)E(+21.98)SVTEQDSK	42.74	2158.91	20	10	720.652	3	10.0965	248000	2040000	1851	20210616_HS_C_50ng_F4-3.raw	4	A0A5H1ZRQ3|A0A5H1ZRQ3_HUMAN;P01834|IGKC_HUMAN	Deamidation (NQ); Deamidation (NQ); Sodium adduct	Q6:Deamidation (NQ):0.00;Q11:Deamidation (NQ):0.00;E12:Sodium adduct:9.28	FALSE
VDNALQ(+0.98)SGNSQE(+21.98)SVTEQDSK	53.84	2157.93	20	-0.9	720.316	3	8.6739	2860000	8600000	1603	20210616_HS_C_50ng_F4-3.raw	8	A0A5H1ZRQ3|A0A5H1ZRQ3_HUMAN;P01834|IGKC_HUMAN	Deamidation (NQ); Sodium adduct	Q6:Deamidation (NQ):12.33;E12:Sodium adduct:25.70	FALSE
VDNALQ(+0.98)SGNSQESVTEQDSK	70.01	2135.95	20	4.2	712.992	3	5.576	2020000	1040000	886	20210616_HS_C_50ng_F4-1.raw	2	A0A5H1ZRQ3|A0A5H1ZRQ3_HUMAN;P01834|IGKC_HUMAN	Deamidation (NQ)	Q6:Deamidation (NQ):0.00	FALSE
VDNALQSGN(+0.98)SQ(+0.98)ESVTEQDSK	49.62	2136.93	20	9.5	713.324	3	14.4491	227000	709000	2652	20210616_HS_C_50ng_F4-2.raw	2	A0A5H1ZRQ3|A0A5H1ZRQ3_HUMAN;P01834|IGKC_HUMAN	Deamidation (NQ); Deamidation (NQ)	N9:Deamidation (NQ):9.42;Q11:Deamidation (NQ):7.38	FALSE
VDNALQSGN(+0.98)SQE(+21.98)SVTEQDSK	39.98	2157.93	20	6.5	720.321	3	5.5139	53200	671000	889	20210616_HS_C_50ng_F4-2.raw	4	A0A5H1ZRQ3|A0A5H1ZRQ3_HUMAN;P01834|IGKC_HUMAN	Deamidation (NQ); Sodium adduct	N9:Deamidation (NQ):0.00;E12:Sodium adduct:11.12	FALSE
VDNALQSGN(+0.98)SQESVTEQDSK	58.05	2135.95	20	4.3	712.992	3	8.4761	2870000	4560000	1578	20210616_HS_C_50ng_F4-3.raw	8	A0A5H1ZRQ3|A0A5H1ZRQ3_HUMAN;P01834|IGKC_HUMAN	Deamidation (NQ)	N9:Deamidation (NQ):0.00	FALSE
VDNALQSGNSQ(+0.98)E(+21.98)SVTEQDSK	54.93	2157.93	20	1.5	720.317	3	8.3643	1520000	2380000	1725	20210616_HS_C_50ng_F4-3.raw	2	A0A5H1ZRQ3|A0A5H1ZRQ3_HUMAN;P01834|IGKC_HUMAN	Deamidation (NQ); Sodium adduct	Q11:Deamidation (NQ):0.00;E12:Sodium adduct:25.55	FALSE
VDNALQSGNSQ(+0.98)ESVTEQDSK	54.16	2135.95	20	1.8	712.99	3	7.2846	3970000	9940000	1499	20210616_HS_C_50ng_F4-2.raw	5	A0A5H1ZRQ3|A0A5H1ZRQ3_HUMAN;P01834|IGKC_HUMAN	Deamidation (NQ)	Q11:Deamidation (NQ):0.00	FALSE
VDNALQSGNSQE(+21.98)SVTE(+21.98)QDSK	68.58	2178.93	20	-9.3	727.309	3	5.9593	14200000	49200000	1015	20210616_HS_C_50ng_F4-1.raw	7	A0A5H1ZRQ3|A0A5H1ZRQ3_HUMAN;P01834|IGKC_HUMAN	Sodium adduct; Sodium adduct	E12:Sodium adduct:59.97;E16:Sodium adduct:27.83	FALSE
VDNALQSGNSQE(+21.98)SVTEQDSK	79.53	2156.94	20	-4.1	719.986	3	6.0061	111000000	772000000	1044	20210616_HS_C_50ng_F4-1.raw	47	A0A5H1ZRQ3|A0A5H1ZRQ3_HUMAN;P01834|IGKC_HUMAN	Sodium adduct	E12:Sodium adduct:43.39	FALSE
VDNALQSGNSQESVTEQDSK	91.83	2134.96	20	-2.2	1068.49	2	6.8258	126000000	851000000	1280	20210616_HS_C_50ng_F4-2.raw	111	A0A5H1ZRQ3|A0A5H1ZRQ3_HUMAN;P01834|IGKC_HUMAN			FALSE
VDTVDPPYPR	47.27	1157.57	10	5.1	579.796	2	13.7636	7520000	23800000	2558	20210616_HS_C_50ng_F3-3.raw	13	P04004|VTNC_HUMAN			FALSE
VEDIPLAR	40.36	911.508	8	-0.9	456.761	2	13.2772	1960000	6090000	2832	20210616_HS_C_50ng_F2-1.raw	10	P04114|APOB_HUMAN			FALSE
VEDTAVYYC(+57.02)AR	45.84	1345.6	11	5.3	673.809	2	12.2378	376000	507000	2296	20210616_HS_C_50ng_F3-3.raw	1		Carbamidomethylation	C9:Carbamidomethylation:1000.00	FALSE
VELLHNPAFC(+57.02)SLATTK	72.47	1799.92	16	1.1	600.983	3	22.0623	4100000	22600000	5266	20210616_HS_C_50ng_F2-2.raw	6	P01024|CO3_HUMAN	Carbamidomethylation	C10:Carbamidomethylation:1000.00	FALSE
VEQAVETEPEPELR	54.43	1624.79	14	1.3	813.405	2	15.775	494000	3340000	3051	20210616_HS_C_50ng_F4-3.raw	5	E7ERP7|E7ERP7_HUMAN;E9PEV4|E9PEV4_HUMAN;P02649|APOE_HUMAN;H0Y7L5|H0Y7L5_HUMAN			FALSE
VEYGFQVK	40.39	968.497	8	0.6	485.256	2	15.1152	2810000	7780000	3272	20210616_HS_C_50ng_F2-1.raw	2	A0A140TA32|A0A140TA32_HUMAN;A0A140TA29|A0A140TA29_HUMAN;P0C0L4|CO4A_HUMAN;P0C0L5|CO4B_HUMAN;A0A0G2JPR0|A0A0G2JPR0_HUMAN;A0A140TA49|A0A140TA49_HUMAN;F5GXS0|F5GXS0_HUMAN;A0A140TA44|A0A140TA44_HUMAN;A0A3B3ISA6|A0A3B3ISA6_HUMAN;A0A0G2JL54|A0A0G2JL54_HUMAN			FALSE
VFDE(+21.98)FKPLVEEPQNLIK	46.94	2066.07	17	3.9	689.7	3	25.5823	1830000	9030000	6138	20210616_HS_C_50ng_F2-1.raw	1	A0A0C4DGB6|A0A0C4DGB6_HUMAN;A0A087WWT3|A0A087WWT3_HUMAN;P02768|ALBU_HUMAN;C9JKR2|C9JKR2_HUMAN;D6RHD5|D6RHD5_HUMAN;B7WNR0|B7WNR0_HUMAN;H0YA55|H0YA55_HUMAN	Sodium adduct	E4:Sodium adduct:0.00	FALSE
VFDEFKPLVE(+21.98)EPQNLIK	40.76	2066.07	17	4.3	689.7	3	25.6303	4260000	23800000	6074	20210616_HS_C_50ng_F2-2.raw	6	A0A0C4DGB6|A0A0C4DGB6_HUMAN;A0A087WWT3|A0A087WWT3_HUMAN;P02768|ALBU_HUMAN;C9JKR2|C9JKR2_HUMAN;D6RHD5|D6RHD5_HUMAN;B7WNR0|B7WNR0_HUMAN;H0YA55|H0YA55_HUMAN	Sodium adduct	E10:Sodium adduct:0.00	FALSE
VFDEFKPLVEEPQ(+0.98)NLIK	26.34	2045.07	17	4.7	682.701	3	31.7961	815000	588000	7306	20210616_HS_C_50ng_F2-1.raw	1	A0A0C4DGB6|A0A0C4DGB6_HUMAN;A0A087WWT3|A0A087WWT3_HUMAN;P02768|ALBU_HUMAN;C9JKR2|C9JKR2_HUMAN;D6RHD5|D6RHD5_HUMAN;B7WNR0|B7WNR0_HUMAN;H0YA55|H0YA55_HUMAN	Deamidation (NQ)	Q13:Deamidation (NQ):14.02	FALSE
VFDEFKPLVEEPQN(+0.98)LIK	76.8	2045.07	17	-6.5	682.693	3	25.4428	559000	5700000	6047	20210616_HS_C_50ng_F2-2.raw	1	A0A0C4DGB6|A0A0C4DGB6_HUMAN;A0A087WWT3|A0A087WWT3_HUMAN;P02768|ALBU_HUMAN;C9JKR2|C9JKR2_HUMAN;D6RHD5|D6RHD5_HUMAN;B7WNR0|B7WNR0_HUMAN;H0YA55|H0YA55_HUMAN	Deamidation (NQ)	N14:Deamidation (NQ):8.69	FALSE
VFDEFKPLVEEPQNLIK	76.72	2044.09	17	-9.9	682.363	3	25.6303	99800000	1160000000	6304	20210616_HS_C_50ng_F2-2.raw	62	A0A0C4DGB6|A0A0C4DGB6_HUMAN;A0A087WWT3|A0A087WWT3_HUMAN;P02768|ALBU_HUMAN;C9JKR2|C9JKR2_HUMAN;D6RHD5|D6RHD5_HUMAN;B7WNR0|B7WNR0_HUMAN;H0YA55|H0YA55_HUMAN			FALSE
VFQFLEK	42.95	909.496	7	-1.2	455.755	2	19.5773	251000	1720000	4619	20210616_HS_C_50ng_F2-1.raw	3	P01031|CO5_HUMAN			FALSE
VFSLQWGEVK	59.5	1191.63	10	4.3	596.824	2	23.0981	356000	2280000	5543	20210616_HS_C_50ng_F2-2.raw	3	G3XAM2|G3XAM2_HUMAN;A0A2R8Y3M9|A0A2R8Y3M9_HUMAN;E7ETH0|E7ETH0_HUMAN;P05156|CFAI_HUMAN			FALSE
VFSN(+0.98)GADLSGVTEEAPLK	74.77	1833.9	18	6.6	917.963	2	23.0837	106000000	604000000	5128	20210616_HS_C_50ng_F4-2.raw	44		Deamidation (NQ)		FALSE
VFSNGAD(+21.98)LSGVTEEAPLK	57.81	1854.9	18	1.1	619.307	3	20.5157	268000	3450000	4176	20210616_HS_C_50ng_F4-1.raw	3		Sodium adduct	D7:Sodium adduct:41.94	FALSE
VFSNGADLSGVTEEAPLK	74.95	1832.92	18	3.5	917.468	2	20.5876	17300000	139000000	4400	20210616_HS_C_50ng_F3-1.raw	12				FALSE
VGAHAGEYGAEALER	40.2	1528.73	15	0.9	510.583	3	13.0334	467000	1080000	2776	20210616_HS_C_50ng_F2-2.raw	1	P69905|HBA_HUMAN;A0A2R8Y7C0|A0A2R8Y7C0_HUMAN			FALSE
VGDTLNLNLR	57.22	1113.61	10	-1	557.814	2	18.8911	8830000	52400000	4406	20210616_HS_C_50ng_F2-2.raw	7	A0A140TA32|A0A140TA32_HUMAN;A0A140TA29|A0A140TA29_HUMAN;P0C0L4|CO4A_HUMAN;P0C0L5|CO4B_HUMAN;A0A0G2JPR0|A0A0G2JPR0_HUMAN;A0A140TA49|A0A140TA49_HUMAN;F5GXS0|F5GXS0_HUMAN;A0A140TA44|A0A140TA44_HUMAN;A0A3B3ISA6|A0A3B3ISA6_HUMAN;A0A0G2JL54|A0A0G2JL54_HUMAN			FALSE
VGEYSLYIGR	53.44	1155.59	10	2.4	578.805	2	18.8799	2410000	17100000	4385	20210616_HS_C_50ng_F2-1.raw	7	P02743|SAMP_HUMAN			FALSE
VGFYESDVM(+15.99)GR	43.44	1274.56	11	-5.7	638.284	2	14.0548	22400000	69900000	2694	20210616_HS_C_50ng_F3-1.raw	17	P01023|A2MG_HUMAN	Oxidation (M)		FALSE
VGYVSGWGQSDNFK	50.91	1542.71	14	-1.1	772.362	2	19.4875	449000	4320000	4050	20210616_HS_C_50ng_F3-1.raw	3				FALSE
VGYVSGWGR	54.25	979.487	9	-0.7	490.751	2	15.5518	37000000	152000000	3337	20210616_HS_C_50ng_F2-2.raw	14	P00738|HPT_HUMAN;J3QLC9|J3QLC9_HUMAN;H3BS21|H3BS21_HUMAN;A0A087WU08|A0A087WU08_HUMAN;H0Y300|H0Y300_HUMAN;A0A0C4DGL8|A0A0C4DGL8_HUMAN;J3QR68|J3QR68_HUMAN			FALSE
VHQYFNVELIQPGAVK	58.65	1840.98	16	6.6	614.673	3	23.4659	370000	2620000	5637	20210616_HS_C_50ng_F2-2.raw	2	P01024|CO3_HUMAN;M0QYC8|M0QYC8_HUMAN			FALSE
VHTE(+21.98)C(+57.02)C(+57.02)HGD(+21.98)LLEC(+57.02)ADDR	46.99	2129.79	17	8.9	710.945	3	16.3637	3670000	16000000	2979	20210616_HS_C_50ng_F1-2.raw	3	A0A0C4DGB6|A0A0C4DGB6_HUMAN;P02768|ALBU_HUMAN;C9JKR2|C9JKR2_HUMAN;D6RHD5|D6RHD5_HUMAN;B7WNR0|B7WNR0_HUMAN;H0YA55|H0YA55_HUMAN	Sodium adduct; Carbamidomethylation; Carbamidomethylation; Sodium adduct; Carbamidomethylation	E4:Sodium adduct:32.94;C5:Carbamidomethylation:1000.00;C6:Carbamidomethylation:1000.00;D9:Sodium adduct:47.09;C13:Carbamidomethylation:1000.00	FALSE
VHTE(+21.98)C(+57.02)C(+57.02)HGDLLEC(+57.02)ADDR	93.98	2107.81	17	3.7	703.614	3	13.3918	57300	693000	2302	20210616_HS_C_50ng_F1-2.raw	2	A0A0C4DGB6|A0A0C4DGB6_HUMAN;P02768|ALBU_HUMAN;C9JKR2|C9JKR2_HUMAN;D6RHD5|D6RHD5_HUMAN;B7WNR0|B7WNR0_HUMAN;H0YA55|H0YA55_HUMAN	Sodium adduct; Carbamidomethylation; Carbamidomethylation; Carbamidomethylation	E4:Sodium adduct:30.64;C5:Carbamidomethylation:1000.00;C6:Carbamidomethylation:1000.00;C13:Carbamidomethylation:1000.00	FALSE
VHTEC(+57.02)C(+57.02)HGD(+21.98)LLEC(+57.02)ADDR	44.62	2107.81	17	2.9	703.613	3	12.4346	340000	1260000	2640	20210616_HS_C_50ng_F2-1.raw	2	A0A0C4DGB6|A0A0C4DGB6_HUMAN;P02768|ALBU_HUMAN;C9JKR2|C9JKR2_HUMAN;D6RHD5|D6RHD5_HUMAN;B7WNR0|B7WNR0_HUMAN;H0YA55|H0YA55_HUMAN	Carbamidomethylation; Carbamidomethylation; Sodium adduct; Carbamidomethylation	C5:Carbamidomethylation:1000.00;C6:Carbamidomethylation:1000.00;D9:Sodium adduct:0.00;C13:Carbamidomethylation:1000.00	FALSE
VHTEC(+57.02)C(+57.02)HGDLLEC(+57.02)ADDR	113.34	2085.83	17	-9.8	696.277	3	12.3878	70500000	343000000	2288	20210616_HS_C_50ng_F1-1.raw	126	A0A0C4DGB6|A0A0C4DGB6_HUMAN;P02768|ALBU_HUMAN;C9JKR2|C9JKR2_HUMAN;D6RHD5|D6RHD5_HUMAN;B7WNR0|B7WNR0_HUMAN;H0YA55|H0YA55_HUMAN	Carbamidomethylation; Carbamidomethylation; Carbamidomethylation	C5:Carbamidomethylation:1000.00;C6:Carbamidomethylation:1000.00;C13:Carbamidomethylation:1000.00	FALSE
VHTEC(+57.02)C(+57.02)HGDLLEC(+57.02)ADDRADLAK	92.44	2584.11	22	-9.1	647.029	4	17.4816	7990000	76400000	3286	20210616_HS_C_50ng_F1-1.raw	14	A0A0C4DGB6|A0A0C4DGB6_HUMAN;P02768|ALBU_HUMAN;C9JKR2|C9JKR2_HUMAN;D6RHD5|D6RHD5_HUMAN;B7WNR0|B7WNR0_HUMAN;H0YA55|H0YA55_HUMAN	Carbamidomethylation; Carbamidomethylation; Carbamidomethylation	C5:Carbamidomethylation:1000.00;C6:Carbamidomethylation:1000.00;C13:Carbamidomethylation:1000.00	FALSE
VIGNM(+15.99)GQTM(+15.99)EQLTPELK	46.83	1919.93	17	1.8	960.976	2	17.8471	3100000	25700000	3404	20210616_HS_C_50ng_F4-1.raw	9	A8MUN2|A8MUN2_HUMAN;P04114|APOB_HUMAN	Oxidation (M); Oxidation (M)		FALSE
VIPAC(+57.02)LPSPNYVVADR	31.34	1769.91	16	3.3	885.967	2	22.1054	378000	3750000	4827	20210616_HS_C_50ng_F4-3.raw	3	P00747|PLMN_HUMAN	Carbamidomethylation	C5:Carbamidomethylation:1000.00	FALSE
VLDELTLAR	46.39	1028.59	9	1.7	515.302	2	18.6947	98800	708000	4297	20210616_HS_C_50ng_F2-2.raw	3				FALSE
VLFYVDSEK	49.02	1098.56	9	3.1	550.289	2	18.0381	329000	2450000	4130	20210616_HS_C_50ng_F2-1.raw	3	P10643|CO7_HUMAN			FALSE
VLGAFSDGLAHLDNLK	38.78	1668.88	16	2.9	557.303	3	23.9672	83800	710000	5818	20210616_HS_C_50ng_F2-1.raw	1	F8W6P5|F8W6P5_HUMAN;E9PFT6|E9PFT6_HUMAN;P02042|HBD_HUMAN;P68871|HBB_HUMAN;A0A2R8Y7R2|A0A2R8Y7R2_HUMAN;E9PEW8|E9PEW8_HUMAN			FALSE
VLLDGVQNPR	55.73	1109.62	10	0.8	555.817	2	14.7797	30600000	235000000	3301	20210616_HS_C_50ng_F2-2.raw	21	P01024|CO3_HUMAN			FALSE
VLSLAQE(+21.98)QVGGSPEK	40.09	1562.79	15	-0.6	521.938	3	16.7183	239000	2280000	3317	20210616_HS_C_50ng_F3-3.raw	4	A0A140TA32|A0A140TA32_HUMAN;A0A140TA29|A0A140TA29_HUMAN;P0C0L4|CO4A_HUMAN;P0C0L5|CO4B_HUMAN;A0A0G2JPR0|A0A0G2JPR0_HUMAN;A0A140TA49|A0A140TA49_HUMAN;F5GXS0|F5GXS0_HUMAN;A0A140TA44|A0A140TA44_HUMAN;A0A3B3ISA6|A0A3B3ISA6_HUMAN;A0A0G2JL54|A0A0G2JL54_HUMAN	Sodium adduct	E7:Sodium adduct:15.08	FALSE
VLSLAQEQVGGSPEK	64.66	1540.81	15	0.6	771.413	2	16.7024	7940000	68100000	3245	20210616_HS_C_50ng_F3-1.raw	13	A0A140TA32|A0A140TA32_HUMAN;A0A140TA29|A0A140TA29_HUMAN;P0C0L4|CO4A_HUMAN;P0C0L5|CO4B_HUMAN;A0A0G2JPR0|A0A0G2JPR0_HUMAN;A0A140TA49|A0A140TA49_HUMAN;F5GXS0|F5GXS0_HUMAN;A0A140TA44|A0A140TA44_HUMAN;A0A3B3ISA6|A0A3B3ISA6_HUMAN;A0A0G2JL54|A0A0G2JL54_HUMAN			FALSE
VLTPDAFVC(+57.02)R	40.39	1176.6	10	7.8	589.31	2	19.379	1050000	6690000	4061	20210616_HS_C_50ng_F3-2.raw	2	H0YAC1|H0YAC1_HUMAN;E9PBC5|E9PBC5_HUMAN;P03952|KLKB1_HUMAN	Carbamidomethylation	C9:Carbamidomethylation:1000.00	FALSE
VM(+15.99)PIC(+57.02)LPSK	52.33	1059.55	9	0.5	530.78	2	16.2773	44000000	314000000	3537	20210616_HS_C_50ng_F2-2.raw	15	P00738|HPT_HUMAN;J3QLC9|J3QLC9_HUMAN;H3BS21|H3BS21_HUMAN;A0A087WU08|A0A087WU08_HUMAN;H0Y300|H0Y300_HUMAN;A0A0C4DGL8|A0A0C4DGL8_HUMAN;J3QR68|J3QR68_HUMAN	Oxidation (M); Carbamidomethylation	C5:Carbamidomethylation:1000.00	FALSE
VM(+15.99)PIC(+57.02)LPSKDYAEVGR	46.77	1849.91	16	2.2	617.644	3	19.6856	2790000	16900000	4643	20210616_HS_C_50ng_F2-1.raw	3	P00738|HPT_HUMAN;J3QLC9|J3QLC9_HUMAN;H3BS21|H3BS21_HUMAN;A0A087WU08|A0A087WU08_HUMAN;H0Y300|H0Y300_HUMAN;A0A0C4DGL8|A0A0C4DGL8_HUMAN;J3QR68|J3QR68_HUMAN	Oxidation (M); Carbamidomethylation	C5:Carbamidomethylation:1000.00	FALSE
VNQNLVYESGSLNFSK	46.48	1797.89	16	6.5	899.958	2	20.4165	219000	2450000	4348	20210616_HS_C_50ng_F3-1.raw	3	P04114|APOB_HUMAN			FALSE
VNVDEVGGEALGR	59.24	1313.66	13	1.9	657.837	2	16.4789	9880000	108000000	3188	20210616_HS_C_50ng_F3-1.raw	9	F8W6P5|F8W6P5_HUMAN;P68871|HBB_HUMAN;A0A2R8Y7R2|A0A2R8Y7R2_HUMAN			FALSE
VPAPPSPQPATYTC(+57.02)VVSHEDSR	61.55	2394.13	22	1.5	799.051	3	18.5541	152000	2420000	3773	20210616_HS_C_50ng_F3-1.raw	2	A0A0A0MS09|A0A0A0MS09_HUMAN;P01880|IGHD_HUMAN	Carbamidomethylation	C14:Carbamidomethylation:1000.00	FALSE
VPFDAATLHTSTAM(+15.99)AAQHGM(+15.99)DDDGTGQK	37.46	2904.27	28	3.5	727.076	4	17.4277	190000	2440000	3907	20210616_HS_C_50ng_F2-2.raw	2	A0A0A0MS51|A0A0A0MS51_HUMAN;P06396|GELS_HUMAN;A0A0A0MT01|A0A0A0MT01_HUMAN	Oxidation (M); Oxidation (M)		FALSE
VPGTSTSATLTGLTR	58.46	1460.78	15	-1.6	731.398	2	17.6625	359000	3400000	3519	20210616_HS_C_50ng_F3-1.raw	3	P02751|FINC_HUMAN;H0Y7Z1|H0Y7Z1_HUMAN			FALSE
VPQ(+0.98)VSTPTLVEVSR	47.56	1511.82	14	8.4	756.923	2	25.8106	12700000	81200000	5531	20210616_HS_C_50ng_F3-1.raw	7	A0A0C4DGB6|A0A0C4DGB6_HUMAN;#CONTAM#cont|000097|;#CONTAM#cont|000035|;A0A087WWT3|A0A087WWT3_HUMAN;P02768|ALBU_HUMAN;#CONTAM#cont|000017|;C9JKR2|C9JKR2_HUMAN;D6RHD5|D6RHD5_HUMAN;B7WNR0|B7WNR0_HUMAN;H0YA55|H0YA55_HUMAN	Deamidation (NQ)		FALSE
VPQVSTPTLVE(+21.98)VSR	48.43	1532.82	14	3.8	511.948	3	22.511	124000000	741000000	5044	20210616_HS_C_50ng_F3-1.raw	49	A0A0C4DGB6|A0A0C4DGB6_HUMAN;#CONTAM#cont|000097|;#CONTAM#cont|000035|;A0A087WWT3|A0A087WWT3_HUMAN;P02768|ALBU_HUMAN;#CONTAM#cont|000017|;C9JKR2|C9JKR2_HUMAN;D6RHD5|D6RHD5_HUMAN;B7WNR0|B7WNR0_HUMAN;H0YA55|H0YA55_HUMAN	Sodium adduct	E11:Sodium adduct:32.97	FALSE
VPQVSTPTLVEVSR	71.95	1510.84	14	4.6	756.428	2	20.057	363000000	1960000000	4758	20210616_HS_C_50ng_F2-2.raw	180	A0A0C4DGB6|A0A0C4DGB6_HUMAN;#CONTAM#cont|000097|;#CONTAM#cont|000035|;A0A087WWT3|A0A087WWT3_HUMAN;P02768|ALBU_HUMAN;#CONTAM#cont|000017|;C9JKR2|C9JKR2_HUMAN;D6RHD5|D6RHD5_HUMAN;B7WNR0|B7WNR0_HUMAN;H0YA55|H0YA55_HUMAN			FALSE
VPTGGVEEGLLER	42.22	1354.71	13	-1	678.361	2	18.2586	1660000	14900000	3746	20210616_HS_C_50ng_F3-3.raw	3	A0A0A0MS09|A0A0A0MS09_HUMAN;P01880|IGHD_HUMAN			FALSE
VPVAVQGE(+21.98)D(+21.98)TVQSLTQGDGVAK	50.44	2241.09	22	2.2	748.038	3	20.5412	34200	602000	4289	20210616_HS_C_50ng_F4-2.raw	1	P01024|CO3_HUMAN	Sodium adduct; Sodium adduct	E8:Sodium adduct:12.23;D9:Sodium adduct:13.05	FALSE
VPVAVQGE(+21.98)DTVQ(+0.98)SLTQGDGVAK	48.21	2220.09	22	4.6	556.032	4	20.5594			4290	20210616_HS_C_50ng_F4-2.raw	1	P01024|CO3_HUMAN	Sodium adduct; Deamidation (NQ)	E8:Sodium adduct:0.00;Q12:Deamidation (NQ):0.00	FALSE
VPVAVQGE(+21.98)DTVQSLTQGDGVAK	40.5	2219.1	22	1.2	1110.56	2	20.5412	64200	809000	4281	20210616_HS_C_50ng_F4-2.raw	1	P01024|CO3_HUMAN	Sodium adduct	E8:Sodium adduct:0.00	FALSE
VPVAVQGED(+21.98)TVQSLTQGDGVAK	72.16	2219.1	22	5.1	740.713	3	20.5412	2600000	37000000	4270	20210616_HS_C_50ng_F4-2.raw	7	P01024|CO3_HUMAN	Sodium adduct	D9:Sodium adduct:11.06	FALSE
VPVAVQGEDTVQ(+0.98)SLTQGDGVAK	67.5	2198.11	22	2.5	733.711	3	20.118	318000	4870000	4217	20210616_HS_C_50ng_F4-3.raw	3	P01024|CO3_HUMAN	Deamidation (NQ)	Q12:Deamidation (NQ):42.89	FALSE
VPVAVQGEDTVQSLTQGDGVAK	81.29	2197.12	22	0.9	1099.57	2	20.5412	28100000	275000000	4375	20210616_HS_C_50ng_F4-2.raw	32	P01024|CO3_HUMAN			FALSE
VQALEEANNDLENK	52.06	1585.76	14	4.6	793.89	2	14.2217	1920000	5700000	2660	20210616_HS_C_50ng_F3-1.raw	4	P35527|K1C9_HUMAN			FALSE
VQFELHYQEVK	53.52	1418.72	11	-0.3	473.914	3	19.1495	428000	4320000	3666	20210616_HS_C_50ng_F1-2.raw	3	#CONTAM#cont|000108|;Q5T985|Q5T985_HUMAN;Q5T987|Q5T987_HUMAN;P19823|ITIH2_HUMAN			FALSE
VQPYLDDFQK	51.83	1251.61	10	-4	626.812	2	17.8765	48700000	315000000	3639	20210616_HS_C_50ng_F3-1.raw	27	F8W696|F8W696_HUMAN;P02647|APOA1_HUMAN			FALSE
VSALLTPAEQTGTWK	52.68	1600.85	15	0	801.43	2	20.3183	1980000	18300000	4377	20210616_HS_C_50ng_F3-3.raw	3	P04114|APOB_HUMAN			FALSE
VSEADSSNADWVTK	54.98	1507.68	14	3.9	754.85	2	10.9402	1210000	3690000	2155	20210616_HS_C_50ng_F3-3.raw	4	E7ETN3|E7ETN3_HUMAN;P00751|CFAB_HUMAN;A0A0G2JH38|A0A0G2JH38_HUMAN;B4E1Z4|B4E1Z4_HUMAN			FALSE
VSFLSALEEYTK	65.55	1385.71	12	1.7	693.862	2	26.6132	4600000	38800000	6263	20210616_HS_C_50ng_F2-2.raw	12	F8W696|F8W696_HUMAN;P02647|APOA1_HUMAN			FALSE
VSTAFVYTK	49.45	1014.54	9	0.7	508.277	2	14.4479	2370000	6840000	3066	20210616_HS_C_50ng_F2-2.raw	4	P04114|APOB_HUMAN			FALSE
VSVFVPPR	65.03	899.523	8	1.6	450.769	2	16.9077	10000000	81100000	3924	20210616_HS_C_50ng_F2-2.raw	12	P01871|IGHM_HUMAN			FALSE
VSVQLE(+21.98)ASPAFLAVPVEK	39.31	1905.02	18	2.4	636.016	3	25.6616	34600	508000	5885	20210616_HS_C_50ng_F4-2.raw	1	P01023|A2MG_HUMAN	Sodium adduct	E6:Sodium adduct:67.73	FALSE
VSVQLEASPAFLAVPVEK	57.69	1883.04	18	3.3	942.531	2	25.5485	1750000	15500000	5701	20210616_HS_C_50ng_F4-1.raw	6	P01023|A2MG_HUMAN			FALSE
VTAAPQSVC(+57.02)ALR	57.35	1271.67	12	-7.6	636.835	2	14.3919	24800000	102000000	2708	20210616_HS_C_50ng_F3-1.raw	19	P01023|A2MG_HUMAN	Carbamidomethylation	C9:Carbamidomethylation:1000.00	FALSE
VTASDPLDTLGSEGALSPGGVASLLR	41.11	2482.29	26	4	828.441	3	28.4365	407000	4060000	6529	20210616_HS_C_50ng_F4-2.raw	3	A0A140TA32|A0A140TA32_HUMAN;A0A140TA29|A0A140TA29_HUMAN;P0C0L4|CO4A_HUMAN;P0C0L5|CO4B_HUMAN;A0A0G2JPR0|A0A0G2JPR0_HUMAN;A0A140TA49|A0A140TA49_HUMAN;F5GXS0|F5GXS0_HUMAN;A0A140TA44|A0A140TA44_HUMAN;A0A3B3ISA6|A0A3B3ISA6_HUMAN;A0A0G2JL54|A0A0G2JL54_HUMAN			FALSE
VTEPISAESGEQVER	55.49	1629.78	15	3.7	815.903	2	11.531	1740000	3390000	2179	20210616_HS_C_50ng_F3-1.raw	3				FALSE
VTGEGC(+57.02)VYLQTSLK	59.56	1553.78	14	2.7	777.897	2	18.6732	853000	5940000	3796	20210616_HS_C_50ng_F3-1.raw	3	P01023|A2MG_HUMAN	Carbamidomethylation	C6:Carbamidomethylation:1000.00	FALSE
VTGWGNLK	44.25	873.471	8	0.8	437.743	2	14.1128	322000	790000	2994	20210616_HS_C_50ng_F2-2.raw	3	P00734|THRB_HUMAN;E9PIT3|E9PIT3_HUMAN			FALSE
VTLTC(+57.02)VAPLSGVDFQLR	60.02	1874.99	17	5.1	626.008	3	26.5503	58400	963000	6139	20210616_HS_C_50ng_F4-2.raw	2	P04217|A1BG_HUMAN;M0R009|M0R009_HUMAN	Carbamidomethylation	C5:Carbamidomethylation:1000.00	FALSE
VTSIQD(+21.98)WVQK	51.74	1224.61	10	3.2	613.315	2	18.4892	1610000	15200000	4229	20210616_HS_C_50ng_F2-2.raw	5	P00738|HPT_HUMAN;J3QLC9|J3QLC9_HUMAN;A0A087WU08|A0A087WU08_HUMAN;H0Y300|H0Y300_HUMAN;A0A0C4DGL8|A0A0C4DGL8_HUMAN;J3QR68|J3QR68_HUMAN	Sodium adduct	D6:Sodium adduct:62.23	FALSE
VTSIQDWVQK	55.07	1202.63	10	-1.6	602.321	2	18.5042	68300000	351000000	3815	20210616_HS_C_50ng_F3-1.raw	34	P00738|HPT_HUMAN;J3QLC9|J3QLC9_HUMAN;A0A087WU08|A0A087WU08_HUMAN;H0Y300|H0Y300_HUMAN;A0A0C4DGL8|A0A0C4DGL8_HUMAN;J3QR68|J3QR68_HUMAN			FALSE
VTTSQDM(+15.99)LSIM(+15.99)EK	50.3	1513.7	13	-0.4	757.857	2	12.0249	4300000	9020000	2325	20210616_HS_C_50ng_F3-3.raw	9	H9KV48|H9KV48_HUMAN;P05155|IC1_HUMAN;E9PGN7|E9PGN7_HUMAN	Oxidation (M); Oxidation (M)		FALSE
VTTSQDMLSIM(+15.99)EK	45.78	1497.71	13	-0.2	749.86	2	16.9476	45000	468000	3359	20210616_HS_C_50ng_F3-2.raw	2	H9KV48|H9KV48_HUMAN;P05155|IC1_HUMAN;E9PGN7|E9PGN7_HUMAN	Oxidation (M)	M11:Oxidation (M):42.89	FALSE
VTTVASHTSDSDVPSGVTEVVVK	64.22	2313.17	23	5	772.068	3	18.857	7650000	83200000	4346	20210616_HS_C_50ng_F2-2.raw	7	H0YAS8|H0YAS8_HUMAN;P10909|CLUS_HUMAN;H0YC35|H0YC35_HUMAN			FALSE
VTVLGQPK	32.93	840.507	8	2.1	421.262	2	7.0112	1230000	1780000	1753	20210616_HS_C_50ng_F2-3.raw	3	A0A0B4J231|A0A0B4J231_HUMAN;B9A064|IGLL5_HUMAN			FALSE
VTYTSQEDLVEK	49.97	1410.69	12	2.3	706.353	2	13.4232	333000	1300000	2531	20210616_HS_C_50ng_F3-3.raw	2	G3XAM2|G3XAM2_HUMAN;A0A2R8Y3M9|A0A2R8Y3M9_HUMAN;A0A087X0I2|A0A087X0I2_HUMAN;E7ETH0|E7ETH0_HUMAN;P05156|CFAI_HUMAN			FALSE
VVAEGFDFAN(+0.98)GINISPDGK	63.72	1949.94	19	4.6	975.98	2	23.9513	645000	5610000	5284	20210616_HS_C_50ng_F4-1.raw	3	P27169|PON1_HUMAN	Deamidation (NQ)	N10:Deamidation (NQ):16.66	FALSE
VVAQGVGIPEDSIFTM(+15.99)ADR	65.04	2019.99	19	0.3	674.339	3	23.0509	3440000	26000000	5110	20210616_HS_C_50ng_F4-2.raw	6	P02760|AMBP_HUMAN;S4R471|S4R471_HUMAN;S4R3Y4|S4R3Y4_HUMAN	Oxidation (M)		FALSE
VVHVPYR	37.55	868.492	7	5.8	435.256	2	13.8393			2594	20210616_HS_C_50ng_F4-1.raw	1				FALSE
VVLHPNYSQVDIGLIK	59.81	1794	16	2.2	599.01	3	22.9376	537000	4150000	5507	20210616_HS_C_50ng_F2-2.raw	3	P00738|HPT_HUMAN;J3QLC9|J3QLC9_HUMAN;H3BS21|H3BS21_HUMAN;A0A087WU08|A0A087WU08_HUMAN;H0Y300|H0Y300_HUMAN;A0A0C4DGL8|A0A0C4DGL8_HUMAN;J3QR68|J3QR68_HUMAN			FALSE
VVNNSPQPQNVVFDVQIPK	61.55	2121.12	19	2.1	708.049	3	23.6276	1050000	12500000	5298	20210616_HS_C_50ng_F4-2.raw	7	Q5T985|Q5T985_HUMAN;Q5T987|Q5T987_HUMAN;P19823|ITIH2_HUMAN			FALSE
VVSVLTVLHQDWLN(+0.98)GK	42.68	1807.98	16	2.7	603.67	3	27.3185	167000	1410000	6474	20210616_HS_C_50ng_F2-1.raw	2	P01857|IGHG1_HUMAN;A0A0A0MS08|A0A0A0MS08_HUMAN	Deamidation (NQ)	N14:Deamidation (NQ):11.12	FALSE
VVSVLTVVHQDWLN(+0.98)GK	50.37	1793.97	16	3.7	598.999	3	25.2227	612000	3990000	6075	20210616_HS_C_50ng_F2-1.raw	3	P01859|IGHG2_HUMAN;A0A286YEY4|A0A286YEY4_HUMAN	Deamidation (NQ)	N14:Deamidation (NQ):28.70	FALSE
VWVYPPEK	47.55	1016.53	8	-1.1	509.273	2	17.2083	34500000	76900000	3870	20210616_HS_C_50ng_F2-1.raw	15	P02790|HEMO_HUMAN;Q9BS19|Q9BS19_HUMAN			FALSE
VYAC(+57.02)E(+21.98)VTHQGLSSPVTK	65.58	1896.9	17	3.4	633.31	3	16.5099	3730000	29600000	3624	20210616_HS_C_50ng_F2-2.raw	3	A0A5H1ZRQ3|A0A5H1ZRQ3_HUMAN;P01834|IGKC_HUMAN	Carbamidomethylation; Sodium adduct	C4:Carbamidomethylation:1000.00;E5:Sodium adduct:85.25	FALSE
VYAC(+57.02)EVTHQGLSSPVTK	78.36	1874.92	17	-7.3	625.976	3	16.5099	58700000	429000000	3618	20210616_HS_C_50ng_F2-2.raw	23	A0A5H1ZRQ3|A0A5H1ZRQ3_HUMAN;P01834|IGKC_HUMAN	Carbamidomethylation	C4:Carbamidomethylation:1000.00	FALSE
VYAYYNLEESC(+57.02)TR	58.87	1666.73	13	3.5	834.375	2	18.3412	2040000	12000000	3775	20210616_HS_C_50ng_F3-3.raw	5	P01024|CO3_HUMAN	Carbamidomethylation	C11:Carbamidomethylation:1000.00	FALSE
WEAEPVYVQR	42.23	1275.62	10	0.8	638.82	2	17.5784	231000	2290000	3574	20210616_HS_C_50ng_F3-3.raw	2	C9JEV0|C9JEV0_HUMAN;P25311|ZA2G_HUMAN			FALSE
WELLQQVDTSTR	52.58	1474.74	12	2.8	738.38	2	21.4994	608000	4840000	4692	20210616_HS_C_50ng_F3-1.raw	3	#CONTAM#cont|000132|;#CONTAM#cont|000135|;#CONTAM#cont|000134|;P04264|K2C1_HUMAN			FALSE
WLQGSQELPR	57.2	1212.63	10	1.6	607.321	2	17.3152	14800000	102000000	4071	20210616_HS_C_50ng_F2-2.raw	13	P01876|IGHA1_HUMAN;A0A286YEY1|A0A286YEY1_HUMAN			FALSE
WQSIPLC(+57.02)VEK	37.69	1258.64	10	4.4	630.329	2	20.8071	273000	2650000	4933	20210616_HS_C_50ng_F2-2.raw	3	P08603|CFAH_HUMAN	Carbamidomethylation	C7:Carbamidomethylation:1000.00	FALSE
YAASSYLSLTPEQWK	72.87	1742.85	15	2.9	872.436	2	23.4331	22700000	290000000	5126	20210616_HS_C_50ng_F4-1.raw	21	A0A0B4J231|A0A0B4J231_HUMAN;B9A064|IGLL5_HUMAN			FALSE
YAATSQVLLPSK	71.44	1276.7	12	3	639.361	2	17.1309	11600000	110000000	3809	20210616_HS_C_50ng_F2-2.raw	12	P01871|IGHM_HUMAN			FALSE
YDVENC(+57.02)LANK	60.72	1224.54	10	1.4	613.28	2	11.9602	6360000	22800000	2586	20210616_HS_C_50ng_F2-2.raw	14	P01023|A2MG_HUMAN	Carbamidomethylation	C6:Carbamidomethylation:1000.00	FALSE
YEDGTLSLTSTSDLQSGIIK	69.58	2127.06	20	5.9	1064.54	2	22.8846	367000	3050000	5065	20210616_HS_C_50ng_F4-2.raw	2	P04114|APOB_HUMAN			FALSE
YEELQITAGR	54.59	1178.59	10	2.7	590.305	2	15.9657	3990000	15300000	3473	20210616_HS_C_50ng_F2-2.raw	10	#CONTAM#cont|000132|;#CONTAM#cont|000135|;#CONTAM#cont|000134|;P04264|K2C1_HUMAN			FALSE
YEELQVTVGR	45.8	1192.61	10	2.7	597.313	2	16.7323	111000	615000	3275	20210616_HS_C_50ng_F3-1.raw	1	P35908|K22E_HUMAN			FALSE
YEFLN(+0.98)GR	46.21	898.418	7	1.3	450.217	2	14.2489	1340000	2700000	3029	20210616_HS_C_50ng_F2-2.raw	8	P00747|PLMN_HUMAN	Deamidation (NQ)		FALSE
YEITTIHNLFR	36.71	1405.74	11	1.7	469.587	3	22.594	39400	410000	4501	20210616_HS_C_50ng_F1-1.raw	1	P05546|HEP2_HUMAN			FALSE
YENYELTLK	24.86	1171.58	9	8.7	586.8	2	17.8743	68300	616000	3659	20210616_HS_C_50ng_F3-3.raw	1	P04114|APOB_HUMAN			FALSE
YEVDQQIQVLM(+15.99)DK	57.26	1623.78	13	1	812.899	2	19.4705	691000	6550000	4046	20210616_HS_C_50ng_F3-1.raw	3	P04114|APOB_HUMAN	Oxidation (M)		FALSE
YEVSVYALK	37.34	1070.56	9	2.1	536.291	2	18.934	34400	579000	4405	20210616_HS_C_50ng_F2-1.raw	3	P02751|FINC_HUMAN;H0Y7Z1|H0Y7Z1_HUMAN			FALSE
YFIDFVAR	48.97	1029.53	8	2.9	515.773	2	22.6123	917000	3240000	5429	20210616_HS_C_50ng_F2-2.raw	3	P01042|KNG1_HUMAN			FALSE
YGLVTYATYPK	58.17	1274.65	11	2.3	638.336	2	19.3685	2810000	21800000	4005	20210616_HS_C_50ng_F3-1.raw	5	E7ETN3|E7ETN3_HUMAN;P00751|CFAB_HUMAN;A0A0G2JH38|A0A0G2JH38_HUMAN;B4E1Z4|B4E1Z4_HUMAN			FALSE
YGM(+15.99)VAQVTQTLK	63.46	1353.7	12	0.8	677.856	2	16.2613	1490000	6970000	3103	20210616_HS_C_50ng_F3-1.raw	3	A8MUN2|A8MUN2_HUMAN;P04114|APOB_HUMAN	Oxidation (M)		FALSE
YGQTIRPIC(+57.02)LPC(+57.02)TEGTTR	41.38	2122.03	18	3.8	708.353	3	20.2019	179000	2340000	4771	20210616_HS_C_50ng_F2-2.raw	3	H7C5H1|H7C5H1_HUMAN;E7ETN3|E7ETN3_HUMAN;P00751|CFAB_HUMAN;B4E1Z4|B4E1Z4_HUMAN	Carbamidomethylation; Carbamidomethylation	C9:Carbamidomethylation:1000.00;C12:Carbamidomethylation:1000.00	FALSE
YIC(+57.02)EN(+0.98)Q(+0.98)DSISSK	41.68	1444.6	12	3.8	723.311	2	6.6474			1115	20210616_HS_C_50ng_F4-3.raw	1	A0A0C4DGB6|A0A0C4DGB6_HUMAN;P02768|ALBU_HUMAN;C9JKR2|C9JKR2_HUMAN;D6RHD5|D6RHD5_HUMAN;B7WNR0|B7WNR0_HUMAN;H0YA55|H0YA55_HUMAN	Carbamidomethylation; Deamidation (NQ); Deamidation (NQ)	C3:Carbamidomethylation:1000.00	FALSE
YIC(+57.02)EN(+0.98)QDSISSK	44.45	1443.62	12	8.5	722.823	2	16.7645	8890000	22300000	3213	20210616_HS_C_50ng_F3-2.raw	10	A0A0C4DGB6|A0A0C4DGB6_HUMAN;P02768|ALBU_HUMAN;C9JKR2|C9JKR2_HUMAN;D6RHD5|D6RHD5_HUMAN;B7WNR0|B7WNR0_HUMAN;H0YA55|H0YA55_HUMAN	Carbamidomethylation; Deamidation (NQ)	C3:Carbamidomethylation:1000.00;N5:Deamidation (NQ):11.06	FALSE
YIC(+57.02)ENQD(+21.98)SISSK	51.64	1464.62	12	-6.7	733.311	2	5.6212	19900000	64900000	1101	20210616_HS_C_50ng_F3-1.raw	14	A0A0C4DGB6|A0A0C4DGB6_HUMAN;P02768|ALBU_HUMAN;C9JKR2|C9JKR2_HUMAN;D6RHD5|D6RHD5_HUMAN;B7WNR0|B7WNR0_HUMAN;H0YA55|H0YA55_HUMAN	Carbamidomethylation; Sodium adduct	C3:Carbamidomethylation:1000.00;D7:Sodium adduct:37.54	FALSE
YIC(+57.02)ENQDSISSK	60.97	1442.63	12	-4.7	722.321	2	12.1135	175000000	760000000	2184	20210616_HS_C_50ng_F3-1.raw	94	A0A0C4DGB6|A0A0C4DGB6_HUMAN;P02768|ALBU_HUMAN;C9JKR2|C9JKR2_HUMAN;D6RHD5|D6RHD5_HUMAN;B7WNR0|B7WNR0_HUMAN;H0YA55|H0YA55_HUMAN	Carbamidomethylation	C3:Carbamidomethylation:1000.00	FALSE
YLGEEYVK	55.57	999.491	8	-1.6	500.752	2	14.571	62100000	410000000	3254	20210616_HS_C_50ng_F2-2.raw	18	P02787|TRFE_HUMAN			FALSE
YLLGSVNK	41.97	892.502	8	-1.4	447.258	2	21.2292			5188	20210616_HS_C_50ng_F5-2.raw	1				FALSE
YLTWASR	50.05	895.455	7	-0.3	448.735	2	15.0149	14800000	90100000	3397	20210616_HS_C_50ng_F2-1.raw	18	P01876|IGHA1_HUMAN;A0A286YEY1|A0A286YEY1_HUMAN			FALSE
YLYEIAR	56.22	926.486	7	0.3	464.25	2	18.3407	157000000	557000000	4045	20210616_HS_C_50ng_F2-2.raw	175	A0A0C4DGB6|A0A0C4DGB6_HUMAN;#CONTAM#cont|000097|;#CONTAM#cont|000035|;P02768|ALBU_HUMAN;H7C013|H7C013_HUMAN;#CONTAM#cont|000017|;H0YA55|H0YA55_HUMAN			FALSE
YNALDLTNN(+0.98)GK	58.08	1222.58	11	2.4	612.3	2	15.0237	1740000	3130000	2621	20210616_HS_C_50ng_F3-1.raw	3	P04114|APOB_HUMAN	Deamidation (NQ)	N9:Deamidation (NQ):11.06	FALSE
YNALDLTNNGK	57.09	1221.6	11	2.6	611.808	2	14.5606	324000	1670000	3108	20210616_HS_C_50ng_F2-2.raw	3	P04114|APOB_HUMAN			FALSE
YNSQNQSNNQFVLYR	63.95	1873.87	15	3	937.945	2	18.2934	1220000	5850000	3700	20210616_HS_C_50ng_F3-1.raw	3	P01042|KNG1_HUMAN			FALSE
YSLTYIYTGLSK	45.54	1407.73	12	1.2	704.872	2	22.9715	212000	2350000	5241	20210616_HS_C_50ng_F3-2.raw	3	C9JEV0|C9JEV0_HUMAN;P25311|ZA2G_HUMAN			FALSE
YSPSFQGQVTISADK	59.56	1626.79	15	2.8	814.404	2	18.3544	346000	3510000	3715	20210616_HS_C_50ng_F3-1.raw	3	A0A0C4DH38|HV551_HUMAN			FALSE
YTC(+57.02)LPGYVR	48.34	1127.54	9	4.7	564.782	2	16.5916	1800000	8040000	3659	20210616_HS_C_50ng_F2-2.raw	3	P04003|C4BPA_HUMAN	Carbamidomethylation	C3:Carbamidomethylation:1000.00	FALSE
YTFELSR	38.48	914.45	7	2.4	458.233	2	17.0896	5680000	45700000	3791	20210616_HS_C_50ng_F2-2.raw	6	P02774|VTDB_HUMAN;D6RF35|D6RF35_HUMAN			FALSE
YTYNYEAESSSGVPGTADSR	58.9	2152.92	20	-4	718.644	3	16.5396	868000	7130000	3154	20210616_HS_C_50ng_F4-2.raw	4	A8MUN2|A8MUN2_HUMAN;A0A669KB70|A0A669KB70_HUMAN;P04114|APOB_HUMAN			FALSE
YVGGQEHFAHLLILR	49.64	1751.95	15	-0.2	438.994	4	23.138	566000	2970000	4630	20210616_HS_C_50ng_F1-1.raw	5	P02763|A1AG1_HUMAN			FALSE
YVLPNFEVK	54.12	1107.6	9	4.1	554.808	2	21.8271	6940000	44700000	5201	20210616_HS_C_50ng_F2-2.raw	5	A0A140TA32|A0A140TA32_HUMAN;A0A140TA29|A0A140TA29_HUMAN;P0C0L4|CO4A_HUMAN;P0C0L5|CO4B_HUMAN;A0A0G2JPR0|A0A0G2JPR0_HUMAN;A0A140TA49|A0A140TA49_HUMAN;F5GXS0|F5GXS0_HUMAN;A0A140TA44|A0A140TA44_HUMAN;A0A0G2JL54|A0A0G2JL54_HUMAN			FALSE
YVM(+15.99)LPVAD(+21.98)QDQC(+57.02)IR	54.02	1744.79	14	2.7	582.605	3	19.4875	2420000	18000000	4058	20210616_HS_C_50ng_F3-1.raw	7	P00738|HPT_HUMAN;J3QLC9|J3QLC9_HUMAN;H3BS21|H3BS21_HUMAN;A0A087WU08|A0A087WU08_HUMAN;H0Y300|H0Y300_HUMAN;A0A0C4DGL8|A0A0C4DGL8_HUMAN;J3QR68|J3QR68_HUMAN	Oxidation (M); Sodium adduct; Carbamidomethylation	M3:Oxidation (M):1000.00;D8:Sodium adduct:26.31;C12:Carbamidomethylation:1000.00	FALSE
YVM(+15.99)LPVADQDQC(+57.02)IR	70.97	1722.81	14	3.2	862.413	2	19.2319	50000000	397000000	3970	20210616_HS_C_50ng_F4-2.raw	49	P00738|HPT_HUMAN;J3QLC9|J3QLC9_HUMAN;H3BS21|H3BS21_HUMAN;A0A087WU08|A0A087WU08_HUMAN;H0Y300|H0Y300_HUMAN;A0A0C4DGL8|A0A0C4DGL8_HUMAN;J3QR68|J3QR68_HUMAN	Oxidation (M); Carbamidomethylation	C12:Carbamidomethylation:1000.00	FALSE
YVMLPVADQDQC(+57.02)IR	50.9	1706.81	14	6.6	854.419	2	20.8702	52800	655000	4565	20210616_HS_C_50ng_F3-3.raw	3	P00738|HPT_HUMAN;J3QLC9|J3QLC9_HUMAN;H3BS21|H3BS21_HUMAN;A0A087WU08|A0A087WU08_HUMAN;H0Y300|H0Y300_HUMAN;A0A0C4DGL8|A0A0C4DGL8_HUMAN;J3QR68|J3QR68_HUMAN	Carbamidomethylation	C12:Carbamidomethylation:1000.00	FALSE
YVTSAPM(+15.99)PEPQAPGR	55.53	1615.77	15	1.7	808.892	2	12.8644	21900000	62600000	2478	20210616_HS_C_50ng_F3-1.raw	25	P01871|IGHM_HUMAN	Oxidation (M)		FALSE
YWGVASFLQK	48.42	1197.62	10	4.1	599.819	2	24.303	441000	3170000	5816	20210616_HS_C_50ng_F2-2.raw	3	Q5VY30|Q5VY30_HUMAN;P02753|RET4_HUMAN			FALSE
YYC(+57.02)FQGNQFLR	58.48	1494.67	11	4.8	748.347	2	21.4364	1400000	6210000	5102	20210616_HS_C_50ng_F2-2.raw	3	P02790|HEMO_HUMAN;Q9BS19|Q9BS19_HUMAN	Carbamidomethylation	C3:Carbamidomethylation:1000.00	FALSE
YYTYLIM(+15.99)NK	50.86	1223.59	9	4	612.805	2	17.9492	7130000	32100000	4060	20210616_HS_C_50ng_F2-2.raw	6	P01024|CO3_HUMAN	Oxidation (M)		FALSE
