# Supplementary material for: Preparative capillary electrophoresis (CE) fractionation of protein digests improves protein and peptide identification in bottom-up proteomics
Source: Royal Society of Chemistry journal article supplement (doi:10.1039/d1ay02145a), 2022-01-01
Supplement: d1ay02145a6.xlsx [file d1ay02145a6.xlsx]

## Sheet: SI_Plug_control_peptides_and_pr
Peptide	-10LgP	Mass	Length	ppm	m/z	z	RT	Area PLUG_15inj_ctrl_A	Intensity PLUG_15inj_ctrl_A	Scan	Source File	#Spec	Accession	PTM	AScore	Decoy
AADDTWEPFASGK	73.61	1393.62	13	0.8	697.815	2	18.8704	7680000	59400000	3782	20210602_HS_50ng_PLUG-5.raw	15	P02766|TTHY_HUMAN;A0A087WT59|A0A087WT59_HUMAN			FALSE
AAFTE(+21.98)C(+57.02)C(+57.02)QAADK	49.19	1392.54	12	-6.8	697.273	2	5.9815	17100000	63400000	1064	20210602_HS_50ng_PLUG-6.raw	56	A0A0C4DGB6|A0A0C4DGB6_HUMAN;P02768|ALBU_HUMAN;D6RHD5|D6RHD5_HUMAN;B7WNR0|B7WNR0_HUMAN;H0YA55|H0YA55_HUMAN	Sodium adduct; Carbamidomethylation; Carbamidomethylation	E5:Sodium adduct:40.28;C6:Carbamidomethylation:1000.00;C7:Carbamidomethylation:1000.00	FALSE
AAFTEC(+57.02)C(+57.02)Q(+0.98)AADK	41.17	1371.54	12	9.2	686.785	2	11.9503	13300000	30500000	2254	20210602_HS_50ng_PLUG-5.raw	21	A0A0C4DGB6|A0A0C4DGB6_HUMAN;P02768|ALBU_HUMAN;D6RHD5|D6RHD5_HUMAN;B7WNR0|B7WNR0_HUMAN;H0YA55|H0YA55_HUMAN	Carbamidomethylation; Carbamidomethylation; Deamidation (NQ)	C6:Carbamidomethylation:1000.00;C7:Carbamidomethylation:1000.00	FALSE
AAFTEC(+57.02)C(+57.02)QAADK	71.43	1370.56	12	-5.1	686.284	2	6.3699	116000000	352000000	1320	20210602_HS_50ng_PLUG-12.raw	282	A0A0C4DGB6|A0A0C4DGB6_HUMAN;P02768|ALBU_HUMAN;D6RHD5|D6RHD5_HUMAN;B7WNR0|B7WNR0_HUMAN;H0YA55|H0YA55_HUMAN	Carbamidomethylation; Carbamidomethylation	C6:Carbamidomethylation:1000.00;C7:Carbamidomethylation:1000.00	FALSE
AAISGENAGLVR	46.21	1156.62	12	0.3	579.317	2	11.4112	1700000	3460000	2147	20210602_HS_50ng_PLUG-7.raw	9	P19827|ITIH1_HUMAN;F8WAS2|F8WAS2_HUMAN			FALSE
AAPSVTLFPPSSE(+21.98)ELQANK	35.7	2006.99	19	0	670.005	3	22.3243	1600000	5870000	4786	20210602_HS_50ng_PLUG-12.raw	3		Sodium adduct	E13:Sodium adduct:0.00	FALSE
AAPSVTLFPPSSEELQANK	56.23	1985.01	19	-1.1	662.677	3	22.3541	141000000	428000000	4919	20210602_HS_50ng_PLUG-8.raw	58				FALSE
AAQVTIQSSGTFSSK	74.5	1510.76	15	2.6	756.394	2	14.8161	4390000	14100000	2929	20210526_HS_PLUG-2.raw	13	P01023|A2MG_HUMAN			FALSE
AC(+57.02)EPGVDYVYK	64.76	1299.58	11	-0.6	650.797	2	15.6744	5510000	29800000	2949	20210602_HS_50ng_PLUG-5.raw	15	P01024|CO3_HUMAN	Carbamidomethylation	C2:Carbamidomethylation:1000.00	FALSE
ADDKETC(+57.02)FAEEGK	63.03	1498.62	13	-5.9	500.546	3	5.457	34300000	74900000	937	20210602_HS_50ng_PLUG-5.raw	124	A0A087WWT3|A0A087WWT3_HUMAN;P02768|ALBU_HUMAN;C9JKR2|C9JKR2_HUMAN;D6RHD5|D6RHD5_HUMAN;B7WNR0|B7WNR0_HUMAN;H0YA55|H0YA55_HUMAN	Carbamidomethylation	C7:Carbamidomethylation:1000.00	FALSE
ADDKETC(+57.02)FAEEGKK	53.82	1626.72	14	-0.8	543.247	3	5.1634	46600000	82800000	858	20210602_HS_50ng_PLUG-14.raw	75	A0A087WWT3|A0A087WWT3_HUMAN;P02768|ALBU_HUMAN;C9JKR2|C9JKR2_HUMAN;D6RHD5|D6RHD5_HUMAN;B7WNR0|B7WNR0_HUMAN;H0YA55|H0YA55_HUMAN	Carbamidomethylation	C7:Carbamidomethylation:1000.00	FALSE
ADGSYAAWLSR	44.55	1195.56	11	3.6	598.793	2	19.2574	32200	450000	4283	20210526_HS_PLUG-3.raw	1				FALSE
ADLFYDVEALDLESPK	67.85	1823.88	16	0.8	912.953	2	26.6554	360000	4520000	6857	20210526_HS_PLUG-2.raw	5	P04196|HRG_HUMAN			FALSE
ADLSGITGAR	45.94	959.504	10	-0.5	480.759	2	8.3343	8130000	5530000	1669	20210602_HS_50ng_PLUG-15.raw	11	G3V3A0|G3V3A0_HUMAN;P01011|AACT_HUMAN			FALSE
ADRDQYE(+21.98)LLC(+57.02)LDNTR	40.69	1902.85	15	-1.5	635.293	3	20.1215	48400	827000	4696	20210526_HS_PLUG-2.raw	1	C9JVG0|C9JVG0_HUMAN;P02787|TRFE_HUMAN	Sodium adduct; Carbamidomethylation	E7:Sodium adduct:13.50;C10:Carbamidomethylation:1000.00	FALSE
ADRDQYELLC(+57.02)LD(+21.98)NTR	36.15	1902.85	15	-3.1	635.291	3	20.1126	113000	2060000	4598	20210526_HS_PLUG-3.raw	2	C9JVG0|C9JVG0_HUMAN;P02787|TRFE_HUMAN	Carbamidomethylation; Sodium adduct	C10:Carbamidomethylation:1000.00;D12:Sodium adduct:0.00	FALSE
ADRDQYELLC(+57.02)LDNTR	72.73	1880.87	15	2.3	941.448	2	20.1137	27400000	245000000	4682	20210526_HS_PLUG-2.raw	37	C9JVG0|C9JVG0_HUMAN;P02787|TRFE_HUMAN	Carbamidomethylation	C10:Carbamidomethylation:1000.00	FALSE
ADSVVDLLSYNVQGSGETTYDHK	58.29	2497.16	23	4.5	833.401	3	23.368	117000	4100000	5747	20210526_HS_PLUG-3.raw	3	P04114|APOB_HUMAN			FALSE
ADVQAHGEGQEFSITC(+57.02)LVDEEEM(+15.99)K	36.51	2737.18	24	0.8	913.407	3	23.3614	35500	820000	5855	20210526_HS_PLUG-2.raw	1	P19827|ITIH1_HUMAN;H7C0N0|H7C0N0_HUMAN	Carbamidomethylation; Oxidation (M)	C16:Carbamidomethylation:1000.00	FALSE
ADVQAHGEGQEFSITC(+57.02)LVDEEEM(+15.99)KK	27.68	2865.28	25	-1	717.329	4	22.89	32200	396000	5581	20210526_HS_PLUG-3.raw	1	P19827|ITIH1_HUMAN;H7C0N0|H7C0N0_HUMAN	Carbamidomethylation; Oxidation (M)	C16:Carbamidomethylation:1000.00	FALSE
AEDHFSVIDFNQNIR	33.55	1803.85	15	2.6	602.293	3	22.0043	471000	5680000	4629	20210602_HS_50ng_PLUG-9.raw	6	Q5T985|Q5T985_HUMAN;P19823|ITIH2_HUMAN			FALSE
AEDTAVYYC(+57.02)AR	41.99	1317.57	11	-2	659.789	2	7.9076	260000	1150000	1503	20210602_HS_50ng_PLUG-9.raw	2		Carbamidomethylation	C9:Carbamidomethylation:1000.00	FALSE
AEFAE(+21.98)VSK	41.53	901.416	8	-3.9	451.713	2	5.4301	21600000	30100000	1115	20210602_HS_50ng_PLUG-15.raw	30	A0A0C4DGB6|A0A0C4DGB6_HUMAN;P02768|ALBU_HUMAN;C9JKR2|C9JKR2_HUMAN;D6RHD5|D6RHD5_HUMAN;B7WNR0|B7WNR0_HUMAN;H0YA55|H0YA55_HUMAN	Sodium adduct	E5:Sodium adduct:38.07	FALSE
AEFAEVSK	51.34	879.434	8	-3.6	880.438	1	6.0842	226000000	1130000000	950	20210602_HS_50ng_PLUG-5.raw	245	A0A0C4DGB6|A0A0C4DGB6_HUMAN;P02768|ALBU_HUMAN;C9JKR2|C9JKR2_HUMAN;D6RHD5|D6RHD5_HUMAN;B7WNR0|B7WNR0_HUMAN;H0YA55|H0YA55_HUMAN			FALSE
AEFAEVSKLVTDLTK	67.89	1649.89	15	4.9	825.958	2	25.7127	654000	7790000	6571	20210526_HS_PLUG-2.raw	6	A0A0C4DGB6|A0A0C4DGB6_HUMAN;P02768|ALBU_HUMAN;C9JKR2|C9JKR2_HUMAN;D6RHD5|D6RHD5_HUMAN;B7WNR0|B7WNR0_HUMAN;H0YA55|H0YA55_HUMAN			FALSE
AEFQDALEK	50.9	1049.5	9	-2.3	525.758	2	12.352	3960000	7480000	2262	20210602_HS_50ng_PLUG-5.raw	13				FALSE
AEM(+15.99)ADQAAAWLTR	67.15	1448.67	13	3.3	725.346	2	19.0405	2250000	17400000	3783	20210602_HS_50ng_PLUG-15.raw	16		Oxidation (M)		FALSE
AEPLAFTFSHDYK	36.11	1524.72	13	3.1	509.252	3	21.1856	68800	1110000	5034	20210526_HS_PLUG-1.raw	1	P04114|APOB_HUMAN			FALSE
AESPEVC(+57.02)FNEESPK	63.83	1621.69	14	2	811.859	2	15.9105	57000	577000	3266	20210526_HS_PLUG-2.raw	1	P43652|AFAM_HUMAN	Carbamidomethylation	C7:Carbamidomethylation:1000.00	FALSE
AGALNSNDAFVLK	64.59	1318.69	13	1.7	660.352	2	19.402	1950000	21200000	3895	20210602_HS_50ng_PLUG-15.raw	15	A0A0A0MS51|A0A0A0MS51_HUMAN;P06396|GELS_HUMAN;A0A0A0MT01|A0A0A0MT01_HUMAN			FALSE
AGDFLEANYM(+15.99)NLQR	63.14	1656.76	14	1.5	829.387	2	19.9868	16100000	114000000	4136	20210602_HS_50ng_PLUG-5.raw	27	M0R0Q9|M0R0Q9_HUMAN;P01024|CO3_HUMAN	Oxidation (M)		FALSE
AGEQVTYTC(+57.02)ATYYK	52.31	1653.73	14	0.7	827.879	2	15.9105	210000	2020000	3259	20210526_HS_PLUG-2.raw	3	P08603|CFAH_HUMAN	Carbamidomethylation	C9:Carbamidomethylation:1000.00	FALSE
AGEVQEPELR	49.3	1126.56	10	-2.2	564.287	2	7.6159	2010000	6830000	1447	20210602_HS_50ng_PLUG-12.raw	14	P25311|ZA2G_HUMAN			FALSE
AIEDYINEFSVR	64.96	1454.7	12	-0.7	728.362	2	23.0569	569000	7590000	5747	20210526_HS_PLUG-2.raw	10	P02748|CO9_HUMAN			FALSE
AIGYLN(+0.98)TGYQR	47.74	1255.62	11	-3.6	628.815	2	16.1125	1110000	7350000	3056	20210602_HS_50ng_PLUG-5.raw	15	P01023|A2MG_HUMAN	Deamidation (NQ)	N6:Deamidation (NQ):25.70	FALSE
AIGYLNTGYQR	58.53	1254.64	11	4.6	628.328	2	16.587	17000000	114000000	3127	20210602_HS_50ng_PLUG-15.raw	34	P01023|A2MG_HUMAN			FALSE
AIPVTQYLK	44.73	1031.6	9	1.8	516.809	2	19.3627	1350000	13500000	3831	20210602_HS_50ng_PLUG-14.raw	15	P43652|AFAM_HUMAN			FALSE
ALEESNYELEGK	59.3	1380.64	12	2.7	691.33	2	13.5335	1030000	3960000	2488	20210602_HS_50ng_PLUG-15.raw	8	#CONTAM#cont|000133|;#CONTAM#cont|000131|;P13645|K1C10_HUMAN;#CONTAM#cont|000129|;#CONTAM#cont|000136|;#CONTAM#cont|000122|			FALSE
ALEILQ(+0.98)EEDLIDEDDIPVR	48.39	2225.09	19	8.3	742.715	3	26.3685			6783	20210526_HS_PLUG-2.raw	1		Deamidation (NQ)		FALSE
ALEILQEEDLIDEDDIPVR	57.18	2224.11	19	1.2	1113.07	2	26.416	705000	8590000	6773	20210526_HS_PLUG-1.raw	7				FALSE
ALLAFQESK	33.58	1005.55	9	1.3	503.785	2	16.9348	146000	815000	3477	20210526_HS_PLUG-3.raw	1				FALSE
ALLAYAFALAGNQDK	69.06	1564.83	15	-2	783.421	2	25.6979	309000	4500000	6563	20210526_HS_PLUG-2.raw	3	P01023|A2MG_HUMAN			FALSE
ALPAPIEK	41.27	837.496	8	-1.6	419.755	2	10.8583	33100000	112000000	2046	20210602_HS_50ng_PLUG-10.raw	66	P01857|IGHG1_HUMAN;A0A0A0MS08|A0A0A0MS08_HUMAN;A0A0A0MS07|A0A0A0MS07_HUMAN			FALSE
ALQDQLVLVAAK	56.94	1267.75	12	1.2	634.886	2	20.9237	3320000	34100000	4974	20210526_HS_PLUG-2.raw	15	P01019|ANGT_HUMAN			FALSE
ALVEQGFTVPEIK	62.35	1429.78	13	-1.7	715.897	2	22.6502	2660000	25300000	4872	20210602_HS_50ng_PLUG-10.raw	15	P04114|APOB_HUMAN			FALSE
ALYLQYTDETFR	63.12	1518.74	12	3.2	760.377	2	21.7101	2630000	22300000	4607	20210602_HS_50ng_PLUG-10.raw	11	E9PFZ2|E9PFZ2_HUMAN;P00450|CERU_HUMAN			FALSE
ALYWVN(+0.98)GQ(+0.98)VPDGVSK	44.67	1633.8	15	9.2	817.918	2	21.4841	43600	584000	5183	20210526_HS_PLUG-2.raw	1	A8MUN2|A8MUN2_HUMAN;P04114|APOB_HUMAN	Deamidation (NQ); Deamidation (NQ)		FALSE
ALYWVN(+0.98)GQVPDGVSK	56.29	1632.81	15	1.4	817.419	2	21.4782	109000	2130000	5133	20210526_HS_PLUG-1.raw	3	A8MUN2|A8MUN2_HUMAN;P04114|APOB_HUMAN	Deamidation (NQ)	N6:Deamidation (NQ):9.40	FALSE
AM(+15.99)AVEDIISR	35.23	1119.56	10	1.6	560.788	2	15.6155			2875	20210602_HS_50ng_PLUG-14.raw	2		Oxidation (M)		FALSE
ANTVQEATFQM(+15.99)ELPK	64.19	1721.83	15	3.4	861.928	2	18.8549	2920000	33600000	4211	20210526_HS_PLUG-2.raw	15	Q14624|ITIH4_HUMAN;B7ZKJ8|B7ZKJ8_HUMAN	Oxidation (M)		FALSE
APSTWLTAYVVK	65.14	1334.72	12	2.6	668.371	2	23.6278	1370000	15400000	5196	20210602_HS_50ng_PLUG-5.raw	13	P01024|CO3_HUMAN			FALSE
AQLGDLPWQVAIK	46.23	1437.8	13	-0.3	719.909	2	25.219	116000	1610000	6427	20210526_HS_PLUG-2.raw	3	G3XAM2|G3XAM2_HUMAN;A0A2R8Y3M9|A0A2R8Y3M9_HUMAN;E7ETH0|E7ETH0_HUMAN;P05156|CFAI_HUMAN			FALSE
AQPVQVAEGSEPDGFWEALGGK	31.27	2271.08	22	1.8	758.038	3	24.9206	55100	646000	6318	20210526_HS_PLUG-1.raw	1	A0A0A0MS51|A0A0A0MS51_HUMAN;P06396|GELS_HUMAN;A0A0A0MT01|A0A0A0MT01_HUMAN			FALSE
AREDIFM(+15.99)ETLK	56.04	1367.68	11	0.5	456.901	3	18.0262	291000	2210000	3937	20210526_HS_PLUG-2.raw	3	C9JEV0|C9JEV0_HUMAN;P25311|ZA2G_HUMAN	Oxidation (M)		FALSE
ASGSLPYTQTLQDHLNSLK	51.55	2072.05	19	1.6	691.696	3	22.3924	239000	4420000	5462	20210526_HS_PLUG-1.raw	3	P04114|APOB_HUMAN			FALSE
ASSIIDELFQDR	57.65	1392.69	12	-2.9	697.352	2	25.5935	1140000	12900000	6513	20210526_HS_PLUG-2.raw	10	H0YLK8|H0YLK8_HUMAN;P10909|CLUS_HUMAN;H0YC35|H0YC35_HUMAN;E7ERK6|E7ERK6_HUMAN			FALSE
ASYLDC(+57.02)IR	51.66	996.47	8	0.6	499.243	2	15.8683	18300000	95400000	2956	20210602_HS_50ng_PLUG-15.raw	33	F8WCI6|F8WCI6_HUMAN;P02787|TRFE_HUMAN;F8WEK9|F8WEK9_HUMAN;C9JB55|C9JB55_HUMAN	Carbamidomethylation	C6:Carbamidomethylation:1000.00	FALSE
ATFGC(+57.02)HDGYSLDGPEEIEC(+57.02)TK	43.25	2384.99	21	1.9	796.008	3	19.4804			4369	20210526_HS_PLUG-3.raw	1	J3QLI0|J3QLI0_HUMAN;P02749|APOH_HUMAN	Carbamidomethylation; Carbamidomethylation	C5:Carbamidomethylation:1000.00;C19:Carbamidomethylation:1000.00	FALSE
ATFQTPDFIVPLTDLR	49.86	1832.97	16	0.6	917.495	2	28.7901	760000	9250000	7332	20210526_HS_PLUG-1.raw	5	P04114|APOB_HUMAN			FALSE
ATGVLYDYVNK	58.62	1241.63	11	2	621.823	2	17.8594	4780000	32600000	3509	20210602_HS_50ng_PLUG-12.raw	15	P04114|APOB_HUMAN			FALSE
ATLLDIYK	37.22	935.533	8	2	468.776	2	19.8965	83900	844000	4610	20210526_HS_PLUG-2.raw	2	P01031|CO5_HUMAN			FALSE
ATTVTGTPC(+57.02)QDWAAQEPHR	44.65	2124.96	19	0.9	709.332	3	16.7244	63800	1380000	3523	20210526_HS_PLUG-2.raw	2	P00747|PLMN_HUMAN	Carbamidomethylation	C9:Carbamidomethylation:1000.00	FALSE
ATVLN(+0.98)YLPK	27.14	1018.57	9	3.6	510.296	2	21.4741	2630	148000	5085	20210526_HS_PLUG-3.raw	1	P01023|A2MG_HUMAN;P20742|PZP_HUMAN	Deamidation (NQ)		FALSE
ATVLNYLPK	46.76	1017.59	9	1.7	509.801	2	20.159	14900000	99100000	4178	20210602_HS_50ng_PLUG-5.raw	13	P01023|A2MG_HUMAN;P20742|PZP_HUMAN			FALSE
ATWSGAVLAGR	65.7	1087.58	11	1.2	544.797	2	17.6304	2850000	18800000	3432	20210602_HS_50ng_PLUG-10.raw	12	P04217|A1BG_HUMAN			FALSE
AVDQSVLLM(+15.99)KPDAELSASSVYNLLPEK	32.52	2932.51	27	3.7	978.518	3	26.5394	682000	7330000	6810	20210526_HS_PLUG-1.raw	2	P01023|A2MG_HUMAN	Oxidation (M)		FALSE
AVISPGFDVFAK	50.26	1249.67	12	2.1	625.846	2	23.3971	112000	1440000	5870	20210526_HS_PLUG-2.raw	2	E7ETN3|E7ETN3_HUMAN;B4E1Z4|B4E1Z4_HUMAN			FALSE
AVLDVFEEGTEASAATAVK	73.83	1906.95	19	1.6	954.489	2	22.7009	1120000	21100000	5624	20210526_HS_PLUG-2.raw	7	G3V3A0|G3V3A0_HUMAN;P01011|AACT_HUMAN			FALSE
AVLTIDEK	46.17	887.496	8	-1.5	444.755	2	10.9111	37100000	50400000	2008	20210602_HS_50ng_PLUG-5.raw	29				FALSE
AVLYNYR	40.47	897.471	7	-0.5	449.743	2	10.7475	4160000	6420000	2088	20210602_HS_50ng_PLUG-7.raw	31	P01024|CO3_HUMAN			FALSE
AVM(+15.99)D(+21.98)DFAAFVEK	52.39	1379.6	12	-1.2	690.809	2	21.1563	21300000	99200000	4665	20210602_HS_50ng_PLUG-5.raw	13	A0A0C4DGB6|A0A0C4DGB6_HUMAN;A0A087WWT3|A0A087WWT3_HUMAN;P02768|ALBU_HUMAN;C9JKR2|C9JKR2_HUMAN;D6RHD5|D6RHD5_HUMAN;B7WNR0|B7WNR0_HUMAN;H0YA55|H0YA55_HUMAN	Oxidation (M); Sodium adduct	M3:Oxidation (M):1000.00;D4:Sodium adduct:0.00	FALSE
AVM(+15.99)DD(+21.98)FAAFVEK	53.2	1379.6	12	0.5	690.813	2	21.1019	22600000	113000000	5046	20210526_HS_PLUG-2.raw	22	A0A0C4DGB6|A0A0C4DGB6_HUMAN;A0A087WWT3|A0A087WWT3_HUMAN;P02768|ALBU_HUMAN;C9JKR2|C9JKR2_HUMAN;D6RHD5|D6RHD5_HUMAN;B7WNR0|B7WNR0_HUMAN;H0YA55|H0YA55_HUMAN	Oxidation (M); Sodium adduct	M3:Oxidation (M):1000.00;D5:Sodium adduct:0.00	FALSE
AVM(+15.99)DDFAAFVE(+21.98)K	37.35	1379.6	12	0.7	690.81	2	21.1667	2000000	8060000	4371	20210602_HS_50ng_PLUG-9.raw	1	A0A0C4DGB6|A0A0C4DGB6_HUMAN;A0A087WWT3|A0A087WWT3_HUMAN;P02768|ALBU_HUMAN;C9JKR2|C9JKR2_HUMAN;D6RHD5|D6RHD5_HUMAN;B7WNR0|B7WNR0_HUMAN;H0YA55|H0YA55_HUMAN	Oxidation (M); Sodium adduct	M3:Oxidation (M):1000.00;E11:Sodium adduct:0.00	FALSE
AVM(+15.99)DDFAAFVEK	70.45	1357.62	12	-4.5	679.815	2	22.2825	404000000	2610000000	4887	20210602_HS_50ng_PLUG-15.raw	453	A0A0C4DGB6|A0A0C4DGB6_HUMAN;A0A087WWT3|A0A087WWT3_HUMAN;P02768|ALBU_HUMAN;C9JKR2|C9JKR2_HUMAN;D6RHD5|D6RHD5_HUMAN;B7WNR0|B7WNR0_HUMAN;H0YA55|H0YA55_HUMAN	Oxidation (M)		FALSE
AVMDDFAAFVEK	62.31	1341.63	12	3.5	671.823	2	23.8635	7570000	43400000	5039	20210602_HS_50ng_PLUG-15.raw	13	A0A0C4DGB6|A0A0C4DGB6_HUMAN;A0A087WWT3|A0A087WWT3_HUMAN;P02768|ALBU_HUMAN;C9JKR2|C9JKR2_HUMAN;D6RHD5|D6RHD5_HUMAN;B7WNR0|B7WNR0_HUMAN;H0YA55|H0YA55_HUMAN			FALSE
AVSM(+15.99)PSFSILGSDVR	67.99	1580.79	15	2.5	791.403	2	22.4683	844000	7710000	4733	20210602_HS_50ng_PLUG-15.raw	3	P04114|APOB_HUMAN	Oxidation (M)		FALSE
AYLEEEC(+57.02)PATLR	49.83	1450.68	12	-0.1	726.345	2	17.13	1820000	15300000	3281	20210602_HS_50ng_PLUG-11.raw	15	C9JEV0|C9JEV0_HUMAN;P25311|ZA2G_HUMAN	Carbamidomethylation	C7:Carbamidomethylation:1000.00	FALSE
AYSLFSYNTQGR	52.88	1405.66	12	-1.3	703.838	2	19.8877	1270000	12800000	4000	20210602_HS_50ng_PLUG-14.raw	15	P02743|SAMP_HUMAN			FALSE
AYYENSPQQVFSTEFEVK	52.95	2165	18	-0.9	722.675	3	23.4644	1190000	9760000	5895	20210526_HS_PLUG-2.raw	12	P01024|CO3_HUMAN			FALSE
C(+57.02)STSSLLEAC(+57.02)TFR	60.78	1530.68	13	2.8	766.353	2	19.8615	206000	3330000	4547	20210526_HS_PLUG-1.raw	3	P02787|TRFE_HUMAN	Carbamidomethylation; Carbamidomethylation	C1:Carbamidomethylation:1000.00;C10:Carbamidomethylation:1000.00	FALSE
DADPDTFFAK	49.49	1125.5	10	-0.1	563.756	2	17.1028	678000	5940000	3272	20210602_HS_50ng_PLUG-11.raw	11	P43652|AFAM_HUMAN			FALSE
DALSSVQESQVAQQAR	66.34	1715.84	16	0.7	858.93	2	15.8215	1500000	15100000	2953	20210602_HS_50ng_PLUG-8.raw	18				FALSE
DASGATFTWTPSSGK	66.7	1511.69	15	3.5	756.857	2	18.1385	3020000	20000000	3874	20210526_HS_PLUG-3.raw	15				FALSE
DASGVTFTWTPSSGK	78.12	1539.72	15	1.1	770.868	2	20.2748	33500000	271000000	4138	20210602_HS_50ng_PLUG-15.raw	35	P01876|IGHA1_HUMAN;A0A286YEY1|A0A286YEY1_HUMAN			FALSE
DC(+57.02)HLAQVPSHTVVAR	68.13	1688.84	15	1.1	563.957	3	15.124	1940000	9450000	3044	20210526_HS_PLUG-2.raw	8	P02787|TRFE_HUMAN	Carbamidomethylation	C2:Carbamidomethylation:1000.00	FALSE
DD(+21.98)NPNLPR	43.86	961.423	8	-4.3	481.717	2	5.6839	154000000	527000000	1257	20210602_HS_50ng_PLUG-5.raw	78	A0A0C4DGB6|A0A0C4DGB6_HUMAN;A0A087WWT3|A0A087WWT3_HUMAN;P02768|ALBU_HUMAN;H7C013|H7C013_HUMAN	Sodium adduct	D2:Sodium adduct:14.02	FALSE
DDLYVSDAFHK	62.8	1308.6	11	-1.9	437.206	3	17.3144	1570000	16500000	3272	20210602_HS_50ng_PLUG-14.raw	15	P01008|ANT3_HUMAN			FALSE
DDNPNLPR	58.21	939.441	8	-4.9	470.726	2	5.8537	311000000	1490000000	1225	20210602_HS_50ng_PLUG-8.raw	307	A0A0C4DGB6|A0A0C4DGB6_HUMAN;A0A087WWT3|A0A087WWT3_HUMAN;P02768|ALBU_HUMAN;H7C013|H7C013_HUMAN			FALSE
DDTVC(+57.02)LAK	43.3	920.427	8	-5.2	461.219	2	6.2086	1900000	7750000	1050	20210602_HS_50ng_PLUG-14.raw	26	P02787|TRFE_HUMAN	Carbamidomethylation	C5:Carbamidomethylation:1000.00	FALSE
DEELSC(+57.02)TVVELK	62.14	1420.68	12	3	711.347	2	19.0275	2530000	28500000	3794	20210602_HS_50ng_PLUG-8.raw	14	G3V595|G3V595_HUMAN;G3V3A0|G3V3A0_HUMAN;P01011|AACT_HUMAN	Carbamidomethylation	C6:Carbamidomethylation:1000.00	FALSE
DFDFVPPVVR	65.01	1189.61	10	2.4	595.815	2	23.9946	24700000	137000000	5036	20210602_HS_50ng_PLUG-14.raw	26	P01024|CO3_HUMAN			FALSE
DGAGDVAFVK	63.72	977.482	10	-1.1	489.748	2	10.9951	56000000	271000000	2101	20210602_HS_50ng_PLUG-12.raw	157	C9JVG0|C9JVG0_HUMAN;P02787|TRFE_HUMAN			FALSE
DGYLFQLLR	58.13	1123.6	9	2.5	562.812	2	25.937	470000	3910000	6635	20210526_HS_PLUG-2.raw	2	P04196|HRG_HUMAN			FALSE
DHAVDLIQK	32.17	1037.55	9	-2.3	519.781	2	7.6294	251000	772000	1449	20210602_HS_50ng_PLUG-10.raw	3				FALSE
DIAPTLTLYVGK	60.72	1289.72	12	-3.5	645.867	2	22.8122	12400000	94000000	4775	20210602_HS_50ng_PLUG-14.raw	23	P00738|HPT_HUMAN;J3QLC9|J3QLC9_HUMAN;H3BS21|H3BS21_HUMAN;A0A087WU08|A0A087WU08_HUMAN;H0Y300|H0Y300_HUMAN;A0A0C4DGL8|A0A0C4DGL8_HUMAN;J3QR68|J3QR68_HUMAN			FALSE
DIASGLIGPLIIC(+57.02)K	67.79	1468.83	14	2.4	735.428	2	26.6131	676000	6980000	6834	20210526_HS_PLUG-2.raw	3	E9PFZ2|E9PFZ2_HUMAN;P00450|CERU_HUMAN	Carbamidomethylation	C13:Carbamidomethylation:1000.00	FALSE
DIC(+57.02)EEQVN(+0.98)SLPGSITK	47.83	1789.84	16	2.3	895.933	2	18.5894	320000	2650000	4074	20210526_HS_PLUG-1.raw	3	M0R0Q9|M0R0Q9_HUMAN;P01024|CO3_HUMAN	Carbamidomethylation; Deamidation (NQ)	C3:Carbamidomethylation:1000.00;N8:Deamidation (NQ):32.28	FALSE
DIC(+57.02)EEQVNSLPGSITK	75.53	1788.86	16	2.3	895.441	2	18.944	9880000	94600000	4234	20210526_HS_PLUG-2.raw	18	M0R0Q9|M0R0Q9_HUMAN;P01024|CO3_HUMAN	Carbamidomethylation	C3:Carbamidomethylation:1000.00	FALSE
DIFTGLIGPM(+15.99)K	60.54	1206.63	11	3.9	604.328	2	22.9419	5980000	44100000	5711	20210526_HS_PLUG-2.raw	15	E9PFZ2|E9PFZ2_HUMAN;H7C5R1|H7C5R1_HUMAN;P00450|CERU_HUMAN	Oxidation (M)		FALSE
DINYVNPVIK	53.32	1173.64	10	4.9	587.83	2	18.8318	529000	5890000	3782	20210602_HS_50ng_PLUG-12.raw	11	P01031|CO5_HUMAN			FALSE
DIPM(+15.99)NPM(+15.99)C(+57.02)IYR	28.81	1440.62	11	3.9	721.323	2	16.9951	170000	800000	3594	20210526_HS_PLUG-2.raw	1	P01008|ANT3_HUMAN;Q8TCE1|Q8TCE1_HUMAN	Oxidation (M); Oxidation (M); Carbamidomethylation	C8:Carbamidomethylation:1000.00	FALSE
DIPTNSPELEETLTHTITK	74.54	2138.07	19	-3.4	713.699	3	22.7363	885000	14900000	5637	20210526_HS_PLUG-2.raw	14	P01042|KNG1_HUMAN			FALSE
DIQM(+15.99)TQSPSSLSASVGDR	73.84	1893.87	18	0	947.944	2	16.0457	31100000	227000000	3042	20210602_HS_50ng_PLUG-12.raw	32	A0A2Q2TTZ9|A0A2Q2TTZ9_HUMAN	Oxidation (M)		FALSE
DISEVVTPR	43.3	1014.53	9	2.9	508.276	2	12.6293	2090000	5170000	2323	20210602_HS_50ng_PLUG-11.raw	16	H7C5H1|H7C5H1_HUMAN;E7ETN3|E7ETN3_HUMAN;P00751|CFAB_HUMAN;B4E1Z4|B4E1Z4_HUMAN			FALSE
DIVM(+15.99)TQSPLSLPVTPGEPASISC(+57.02)R	49.16	2570.27	24	3	857.77	3	24.4243	562000	6040000	6090	20210526_HS_PLUG-3.raw	3		Oxidation (M); Carbamidomethylation	C23:Carbamidomethylation:1000.00	FALSE
DLATVYVDVLK	54.03	1234.68	11	1.4	618.349	2	23.8697	3940000	34500000	5165	20210602_HS_50ng_PLUG-8.raw	15	P02647|APOA1_HUMAN			FALSE
DLC(+57.02)GC(+57.02)YSVSSVLPGC(+57.02)AEPWNHGK	41.46	2592.12	23	1.9	865.052	3	23.5514	166000	2770000	5808	20210526_HS_PLUG-3.raw	2	P01876|IGHA1_HUMAN;A0A286YEY1|A0A286YEY1_HUMAN	Carbamidomethylation; Carbamidomethylation; Carbamidomethylation	C3:Carbamidomethylation:1000.00;C5:Carbamidomethylation:1000.00;C15:Carbamidomethylation:1000.00	FALSE
DLGEE(+21.98)NFK	49.2	972.416	8	-4.2	487.213	2	7.267	40100000	94700000	1359	20210602_HS_50ng_PLUG-5.raw	23	A0A0C4DGB6|A0A0C4DGB6_HUMAN;A0A087WWT3|A0A087WWT3_HUMAN;P02768|ALBU_HUMAN;H7C013|H7C013_HUMAN;C9JKR2|C9JKR2_HUMAN;B7WNR0|B7WNR0_HUMAN	Sodium adduct	E5:Sodium adduct:12.28	FALSE
DLGEENFK	44.4	950.434	8	-5	476.222	2	7.303	194000000	597000000	1424	20210602_HS_50ng_PLUG-8.raw	148	A0A0C4DGB6|A0A0C4DGB6_HUMAN;A0A087WWT3|A0A087WWT3_HUMAN;P02768|ALBU_HUMAN;H7C013|H7C013_HUMAN;C9JKR2|C9JKR2_HUMAN;B7WNR0|B7WNR0_HUMAN			FALSE
DLKVEDIPLAR	35.49	1267.71	11	-1	423.58	3	20.0452	143000	1400000	4575	20210526_HS_PLUG-3.raw	3	P04114|APOB_HUMAN			FALSE
DLLFRDDTVC(+57.02)LAK	40.33	1564.79	13	2.8	522.608	3	21.9449	635000	7480000	5353	20210526_HS_PLUG-2.raw	5	P02787|TRFE_HUMAN	Carbamidomethylation	C10:Carbamidomethylation:1000.00	FALSE
DLTGFPGPLN(+0.98)DQDN(+0.98)EDC(+57.02)INR	59.02	2290.96	20	5.4	1146.5	2	21.6903			5261	20210526_HS_PLUG-2.raw	1	P01023|A2MG_HUMAN	Deamidation (NQ); Deamidation (NQ); Carbamidomethylation	N10:Deamidation (NQ):0.00;N14:Deamidation (NQ):9.40;C17:Carbamidomethylation:1000.00	FALSE
DLTGFPGPLNDQ(+0.98)DN(+0.98)EDC(+57.02)INR	53.68	2290.96	20	6	1146.5	2	21.7221			5169	20210526_HS_PLUG-3.raw	1	P01023|A2MG_HUMAN	Deamidation (NQ); Deamidation (NQ); Carbamidomethylation	Q12:Deamidation (NQ):0.00;N14:Deamidation (NQ):0.00;C17:Carbamidomethylation:1000.00	FALSE
DLTGFPGPLNDQDN(+0.98)EDC(+57.02)INR	69	2289.98	20	2.7	764.339	3	21.7527	3070000	26800000	5178	20210526_HS_PLUG-3.raw	16	P01023|A2MG_HUMAN	Deamidation (NQ); Carbamidomethylation	N14:Deamidation (NQ):32.28;C17:Carbamidomethylation:1000.00	FALSE
DLYSGLIGPLIVC(+57.02)R	62.39	1574.85	14	4.6	788.439	2	27.5726	285000	2440000	7086	20210526_HS_PLUG-2.raw	3	E9PFZ2|E9PFZ2_HUMAN;H7C5R1|H7C5R1_HUMAN;P00450|CERU_HUMAN	Carbamidomethylation	C13:Carbamidomethylation:1000.00	FALSE
DM(+15.99)YSFLEDM(+15.99)GLK	59.33	1479.63	12	3	740.823	2	20.9006	7450000	61100000	4318	20210602_HS_50ng_PLUG-13.raw	16	P01023|A2MG_HUMAN	Oxidation (M); Oxidation (M)		FALSE
DNELLVYK	47.8	992.518	8	-0.8	497.266	2	16.0923	1330000	6420000	3031	20210602_HS_50ng_PLUG-10.raw	15	P02743|SAMP_HUMAN			FALSE
DNVFDGLVR	55.98	1033.52	9	0.5	517.767	2	19.9417	1690000	17500000	4118	20210602_HS_50ng_PLUG-5.raw	15	P04114|APOB_HUMAN			FALSE
DPTFIPAPIQAK	76.06	1296.71	12	2.5	649.363	2	20.7864	2700000	26100000	4290	20210602_HS_50ng_PLUG-15.raw	15	P01019|ANGT_HUMAN			FALSE
DQYELLC(+57.02)LDNTR	64.83	1538.7	12	3.6	770.365	2	20.8613	4860000	40100000	4959	20210526_HS_PLUG-2.raw	15	C9JVG0|C9JVG0_HUMAN;P02787|TRFE_HUMAN	Carbamidomethylation	C7:Carbamidomethylation:1000.00	FALSE
DSC(+57.02)VGSLVVK	50.6	1062.54	10	1.6	532.277	2	13.9746	8380000	21200000	2572	20210602_HS_50ng_PLUG-11.raw	18	P01024|CO3_HUMAN	Carbamidomethylation	C3:Carbamidomethylation:1000.00	FALSE
DSGFQM(+15.99)NQLR	63.07	1210.54	10	-1.3	606.277	2	7.1263	42400000	148000000	1357	20210602_HS_50ng_PLUG-15.raw	53	P02787|TRFE_HUMAN	Oxidation (M)		FALSE
DSPVLIDFFEDTER	57.69	1681.78	14	3.6	841.905	2	27.4499	418000	3780000	7042	20210526_HS_PLUG-2.raw	2	P04196|HRG_HUMAN			FALSE
DSTYSLSSTLTLSK	71.92	1501.75	14	1.5	751.884	2	20.2166	26900000	321000000	4219	20210602_HS_50ng_PLUG-5.raw	46	A0A5H1ZRQ3|A0A5H1ZRQ3_HUMAN;P01834|IGKC_HUMAN			FALSE
DTEEEDFHVDQATTVK	64.7	1862.82	16	0.1	932.416	2	15.7138	25400000	174000000	2971	20210602_HS_50ng_PLUG-12.raw	35				FALSE
DTEEEDFHVDQVTTVK	84.79	1890.85	16	0.4	946.432	2	17.7139	45600000	422000000	3442	20210602_HS_50ng_PLUG-15.raw	41				FALSE
DTVIKPLLVEPEGLEK	68.8	1779	16	0.9	594.009	3	23.1936	14600000	122000000	4895	20210602_HS_50ng_PLUG-15.raw	29	P01023|A2MG_HUMAN			FALSE
DTWVEHWPEEDEC(+57.02)QDEENQK	49.92	2602.02	20	-1.2	868.349	3	19.6238	119000	2270000	4461	20210526_HS_PLUG-1.raw	2	P01024|CO3_HUMAN	Carbamidomethylation	C13:Carbamidomethylation:1000.00	FALSE
DVFLGM(+15.99)FLYEYAR	59.85	1638.78	13	1.9	820.4	2	28.3067	2720000	9830000	7218	20210526_HS_PLUG-2.raw	4	A0A0C4DGB6|A0A0C4DGB6_HUMAN;P02768|ALBU_HUMAN;C9JKR2|C9JKR2_HUMAN;D6RHD5|D6RHD5_HUMAN;B7WNR0|B7WNR0_HUMAN;H0YA55|H0YA55_HUMAN	Oxidation (M)		FALSE
DVWGIEGPIDAAFTR	53.18	1645.81	15	2.9	823.918	2	26.5506	906000	7330000	6723	20210526_HS_PLUG-3.raw	3	P04004|VTNC_HUMAN			FALSE
DWHGVPGQVDAAM(+15.99)AGR	56.91	1681.76	16	2.8	561.599	3	16.6477	1820000	13700000	3413	20210526_HS_PLUG-3.raw	13	P04004|VTNC_HUMAN	Oxidation (M)		FALSE
DYAGVFSDAGLTFTSSSGQQTAQR	61.56	2493.14	24	2.6	832.06	3	23.5127	195000	3870000	5859	20210526_HS_PLUG-1.raw	3	P01024|CO3_HUMAN			FALSE
DYELLC(+57.02)LDGTR	57.3	1353.62	11	2.2	677.823	2	20.9538	4560000	23500000	4987	20210526_HS_PLUG-2.raw	21	P02787|TRFE_HUMAN	Carbamidomethylation	C6:Carbamidomethylation:1000.00	FALSE
DYFM(+15.99)PC(+57.02)PGR	48.26	1157.46	9	2.4	579.74	2	12.8138	1440000	3090000	2384	20210602_HS_50ng_PLUG-5.raw	13	P02790|HEMO_HUMAN;Q9BS19|Q9BS19_HUMAN	Oxidation (M); Carbamidomethylation	C6:Carbamidomethylation:1000.00	FALSE
DYVSQ(+0.98)FEGSALGK	44.41	1400.65	13	9.9	701.337	2	20.544	82500	306000	4219	20210602_HS_50ng_PLUG-13.raw	1	P02647|APOA1_HUMAN	Deamidation (NQ)		FALSE
DYVSQFE(+21.98)GSALGK	30.52	1421.64	13	2.8	711.834	2	19.8391	57600	650000	4495	20210526_HS_PLUG-3.raw	1	P02647|APOA1_HUMAN	Sodium adduct	E7:Sodium adduct:15.01	FALSE
DYVSQFEGSALGK	74.55	1399.66	13	1.4	700.839	2	19.7889	9720000	122000000	4067	20210602_HS_50ng_PLUG-12.raw	42	P02647|APOA1_HUMAN			FALSE
E(+21.98)DPQTFYYAVAVVK	27.27	1650.79	14	3.8	551.275	3	23.2584	44200	686000	5774	20210526_HS_PLUG-1.raw	1	P02787|TRFE_HUMAN	Sodium adduct	E1:Sodium adduct:0.00	FALSE
E(-18.01)AQLPVIENK	48.39	1121.61	10	2.5	561.813	2	17.649	3030000	13800000	3628	20210602_HS_50ng_PLUG-10.raw	5	P00747|PLMN_HUMAN	Pyro-glu from E		FALSE
E(-18.01)C(+57.02)C(+57.02)EKPLLEK	32.06	1286.6	10	-1.1	644.307	2	8.1551	202000	613000	1538	20210602_HS_50ng_PLUG-9.raw	1	A0A0C4DGB6|A0A0C4DGB6_HUMAN;P02768|ALBU_HUMAN;C9JKR2|C9JKR2_HUMAN;D6RHD5|D6RHD5_HUMAN;B7WNR0|B7WNR0_HUMAN;H0YA55|H0YA55_HUMAN	Pyro-glu from E; Carbamidomethylation; Carbamidomethylation	C2:Carbamidomethylation:1000.00;C3:Carbamidomethylation:1000.00	FALSE
E(-18.01)D(+21.98)PQTFYYAVAVVK	36	1632.78	14	1.7	817.402	2	25.1778	106000	1060000	6339	20210526_HS_PLUG-3.raw	2	P02787|TRFE_HUMAN	Pyro-glu from E; Sodium adduct	E1:Pyro-glu from E:1000.00;D2:Sodium adduct:54.40	FALSE
E(-18.01)DPQTFYYAVAVVK	68.37	1610.8	14	4.7	806.413	2	25.1357	1620000	14500000	6388	20210526_HS_PLUG-2.raw	9	P02787|TRFE_HUMAN	Pyro-glu from E		FALSE
E(-18.01)ELLPAQDIK	36.92	1136.61	10	3.9	569.316	2	19.3588	23700	303000	4376	20210526_HS_PLUG-1.raw	1	H7C5H1|H7C5H1_HUMAN;E7ETN3|E7ETN3_HUMAN;P00751|CFAB_HUMAN;B4E1Z4|B4E1Z4_HUMAN	Pyro-glu from E		FALSE
E(-18.01)FQLFSSPHGK	61.3	1257.61	11	2.5	629.816	2	21.9505	8850000	63800000	4588	20210602_HS_50ng_PLUG-15.raw	15	P02787|TRFE_HUMAN	Pyro-glu from E		FALSE
E(-18.01)GTC(+57.02)PEAPTDEC(+57.02)KPVK	56.23	1798.79	16	-2.4	900.398	2	7.3705	51000	487000	1340	20210602_HS_50ng_PLUG-14.raw	1	P02787|TRFE_HUMAN	Pyro-glu from E; Carbamidomethylation; Carbamidomethylation	C4:Carbamidomethylation:1000.00;C12:Carbamidomethylation:1000.00	FALSE
E(-18.01)HAVEGDC(+57.02)DFQLLK	61.41	1641.75	14	3.6	821.886	2	20.5745	1690000	18000000	4798	20210526_HS_PLUG-1.raw	15	P02765|FETUA_HUMAN;C9JV77|C9JV77_HUMAN	Pyro-glu from E; Carbamidomethylation	C8:Carbamidomethylation:1000.00	FALSE
E(-18.01)IGELYLPK	40.9	1042.57	9	2.7	522.296	2	22.91	1300000	3160000	5705	20210526_HS_PLUG-2.raw	8	G3V3A0|G3V3A0_HUMAN;P01011|AACT_HUMAN	Pyro-glu from E		FALSE
E(-18.01)PQVYTLPPSR	65.73	1267.66	11	0.6	634.836	2	18.4362	8700000	23000000	3592	20210602_HS_50ng_PLUG-14.raw	16	P01859|IGHG2_HUMAN;P01857|IGHG1_HUMAN;A0A286YEY4|A0A286YEY4_HUMAN;A0A0A0MS08|A0A0A0MS08_HUMAN;A0A0A0MS07|A0A0A0MS07_HUMAN	Pyro-glu from E		FALSE
E(-18.01)PQVYTLPPSRDELTK	45.68	1853.95	16	-1.6	927.986	2	20.2459	489000	2040000	4629	20210526_HS_PLUG-3.raw	4	P01857|IGHG1_HUMAN;A0A0A0MS08|A0A0A0MS08_HUMAN;A0A0A0MS07|A0A0A0MS07_HUMAN	Pyro-glu from E		FALSE
E(-18.01)PQVYTLPPSREEM(+15.99)TK	39.82	1901.92	16	4	951.974	2	17.8881	611000	2590000	3870	20210526_HS_PLUG-1.raw	2	P01859|IGHG2_HUMAN;A0A286YEY4|A0A286YEY4_HUMAN	Pyro-glu from E; Oxidation (M)		FALSE
E(-18.01)QLSLLDR	43.82	954.513	8	-0.7	478.264	2	19.4652	112000	1430000	3994	20210602_HS_50ng_PLUG-5.raw	5	G3V595|G3V595_HUMAN;P01011|AACT_HUMAN	Pyro-glu from E		FALSE
E(-18.01)TAASLLQAGYK	58.71	1232.64	12	-0.5	617.327	2	20.0223	58800	1150000	4102	20210602_HS_50ng_PLUG-8.raw	4	P00734|THRB_HUMAN	Pyro-glu from E		FALSE
E(-18.01)TLFSVM(+15.99)PGLK	29.68	1218.63	11	3.7	610.328	2	23.0107	38900	353000	5692	20210526_HS_PLUG-1.raw	1	Q14624|ITIH4_HUMAN;B7ZKJ8|B7ZKJ8_HUMAN;H7C0L5|H7C0L5_HUMAN	Pyro-glu from E; Oxidation (M)		FALSE
E(-18.01)TLYSVM(+15.99)PGLK	43.68	1234.63	11	0.7	618.321	2	21.0196	37600	445000	4353	20210602_HS_50ng_PLUG-15.raw	3		Pyro-glu from E; Oxidation (M)		FALSE
E(-18.01)TYGE(+21.98)M(+15.99)ADC(+57.02)C(+57.02)AK	69.6	1453.49	12	-6.1	727.749	2	5.7495	130000	1430000	989	20210602_HS_50ng_PLUG-12.raw	7	A0A0C4DGB6|A0A0C4DGB6_HUMAN;A0A087WWT3|A0A087WWT3_HUMAN;P02768|ALBU_HUMAN;H7C013|H7C013_HUMAN	Pyro-glu from E; Sodium adduct; Oxidation (M); Carbamidomethylation; Carbamidomethylation	E1:Pyro-glu from E:1000.00;E5:Sodium adduct:22.45;M6:Oxidation (M):1000.00;C9:Carbamidomethylation:1000.00;C10:Carbamidomethylation:1000.00	FALSE
E(-18.01)VQLVE(+21.98)SGGGLVQPGGSLR	55.77	1884.97	19	5.1	943.499	2	23.3645	78900	1230000	5814	20210526_HS_PLUG-1.raw	3		Pyro-glu from E; Sodium adduct	E1:Pyro-glu from E:1000.00;E6:Sodium adduct:67.11	FALSE
E(-18.01)VQLVESGGGLVQPGGSLR	80.4	1862.98	19	1.3	932.505	2	23.3156	795000	10100000	5839	20210526_HS_PLUG-2.raw	8		Pyro-glu from E		FALSE
EAGIPEFYDYDVALIK	44.86	1841.91	16	1.5	921.967	2	26.6849	1260000	11200000	6860	20210526_HS_PLUG-2.raw	3	H7C5H1|H7C5H1_HUMAN;E7ETN3|E7ETN3_HUMAN;P00751|CFAB_HUMAN;A0A0G2JH38|A0A0G2JH38_HUMAN;B4E1Z4|B4E1Z4_HUMAN			FALSE
EAQLPVIENK	46.72	1139.62	10	3.6	570.819	2	16.0688	4560000	17100000	2997	20210602_HS_50ng_PLUG-13.raw	15	P00747|PLMN_HUMAN			FALSE
EDIFM(+15.99)ETLK	37.44	1140.54	9	1.2	571.277	2	19.1066	31300	356000	3766	20210602_HS_50ng_PLUG-14.raw	1	C9JEV0|C9JEV0_HUMAN;P25311|ZA2G_HUMAN	Oxidation (M)		FALSE
EDIPPADLSD(+21.98)QVPDTESETR	42.9	2234.98	20	-2.1	746.002	3	18.6453	72300	982000	4112	20210526_HS_PLUG-1.raw	2	P01024|CO3_HUMAN	Sodium adduct	D10:Sodium adduct:0.00	FALSE
EDIPPADLSDQVPDTESETR	43.61	2213	20	3.2	1107.51	2	18.779	5780000	17400000	4088	20210526_HS_PLUG-2.raw	22	P01024|CO3_HUMAN			FALSE
EDPQ(+0.98)TFYYAVAVVK	44.72	1629.79	14	7.8	815.91	2	23.7179	390000	981000	5119	20210602_HS_50ng_PLUG-8.raw	2	P02787|TRFE_HUMAN	Deamidation (NQ)		FALSE
EDPQTFYYAVAVVK	68.05	1628.81	14	2.6	815.414	2	23.2456	28300000	257000000	4980	20210602_HS_50ng_PLUG-12.raw	47	P02787|TRFE_HUMAN			FALSE
EDVYVVGTVLR	75.57	1248.67	11	-0.6	625.343	2	20.7571	1860000	24000000	4274	20210602_HS_50ng_PLUG-15.raw	11	P04003|C4BPA_HUMAN			FALSE
EELLPAQDIK	49.57	1154.62	10	4.5	578.319	2	17.23	396000	3550000	3300	20210602_HS_50ng_PLUG-9.raw	2	H7C5H1|H7C5H1_HUMAN;E7ETN3|E7ETN3_HUMAN;P00751|CFAB_HUMAN;B4E1Z4|B4E1Z4_HUMAN			FALSE
EENFYVDETTVVK	62.52	1571.74	13	3.2	786.881	2	18.944	268000	4060000	4244	20210526_HS_PLUG-2.raw	3	P08185|CBG_HUMAN			FALSE
EESSSGSSHAVM(+15.99)DISLPTGISANEEDLK	30.23	2905.31	28	-1.3	969.447	3	21.7527	90000	1630000	5179	20210526_HS_PLUG-3.raw	2	P01031|CO5_HUMAN	Oxidation (M)		FALSE
EFNAETFTFHADIC(+57.02)TLSEK	68.94	2259.02	19	-3.2	754.013	3	24.5682	3760000	35300000	6226	20210526_HS_PLUG-2.raw	5	A0A0C4DGB6|A0A0C4DGB6_HUMAN;A0A087WWT3|A0A087WWT3_HUMAN;P02768|ALBU_HUMAN;C9JKR2|C9JKR2_HUMAN;D6RHD5|D6RHD5_HUMAN;B7WNR0|B7WNR0_HUMAN;H0YA55|H0YA55_HUMAN	Carbamidomethylation	C14:Carbamidomethylation:1000.00	FALSE
EFQLFSSPHGK	58.98	1275.62	11	0.4	638.822	2	18.944	4920000	40100000	4231	20210526_HS_PLUG-2.raw	26	P02787|TRFE_HUMAN			FALSE
EFQVPTFTIPK	35.65	1305.7	11	2.6	653.86	2	24.8662	1070000	9620000	6214	20210526_HS_PLUG-3.raw	10	P04114|APOB_HUMAN			FALSE
EFTPPVQAAYQK	60.76	1377.69	12	-4.9	689.85	2	17.3493	755000	7700000	3339	20210602_HS_50ng_PLUG-8.raw	14	P68871|HBB_HUMAN			FALSE
EGTC(+57.02)PEAPTDEC(+57.02)KPVK	41.26	1816.8	16	-2.2	606.605	3	6.1487	834000	6390000	1081	20210602_HS_50ng_PLUG-12.raw	5	P02787|TRFE_HUMAN	Carbamidomethylation; Carbamidomethylation	C4:Carbamidomethylation:1000.00;C12:Carbamidomethylation:1000.00	FALSE
EGVQKEDIPPADLSDQVPDTESETR	55.18	2754.28	25	3.9	919.109	3	18.7886	4740000	10100000	4134	20210526_HS_PLUG-2.raw	8	P01024|CO3_HUMAN			FALSE
EGYYGYTGAFR	59.19	1282.56	11	-1.5	642.287	2	18.2949	37600000	199000000	3580	20210602_HS_50ng_PLUG-15.raw	72	H7C5E8|H7C5E8_HUMAN;P02787|TRFE_HUMAN			FALSE
EHAVEGDC(+57.02)DFQLLK	70.65	1659.76	14	3.8	554.261	3	19.3195	3470000	44400000	3914	20210602_HS_50ng_PLUG-12.raw	17	P02765|FETUA_HUMAN;C9JV77|C9JV77_HUMAN	Carbamidomethylation	C8:Carbamidomethylation:1000.00	FALSE
EIETYHNLLEGGQEDFESSGAGK	58.38	2509.12	23	2.8	837.388	3	20.9711	223000	3600000	4886	20210526_HS_PLUG-3.raw	3	K7EQQ3|K7EQQ3_HUMAN;P35527|K1C9_HUMAN			FALSE
EIGELYLPK	49.73	1060.58	9	1.4	531.298	2	20.0772	5320000	43300000	4132	20210602_HS_50ng_PLUG-12.raw	8	G3V3A0|G3V3A0_HUMAN;P01011|AACT_HUMAN			FALSE
EILSVDC(+57.02)STNNPSQAK	36.24	1761.82	16	0.8	881.922	2	14.6917	114000	530000	2947	20210526_HS_PLUG-2.raw	1	P10909|CLUS_HUMAN;H0YC35|H0YC35_HUMAN	Carbamidomethylation	C7:Carbamidomethylation:1000.00	FALSE
EIM(+15.99)ENYNIALR	58.7	1380.67	11	3.5	691.345	2	18.4427	4350000	39400000	3622	20210602_HS_50ng_PLUG-8.raw	15	P08603|CFAH_HUMAN	Oxidation (M)		FALSE
EIVMTQSPPTLSLSPGER	36.34	1940.99	18	9.5	971.514	2	22.0572	80200	975000	5388	20210526_HS_PLUG-2.raw	1				FALSE
EKLQDEDLGFL	36.17	1305.65	11	1.3	653.833	2	22.1853	882000	10100000	5379	20210526_HS_PLUG-1.raw	5	H7C5H1|H7C5H1_HUMAN;E7ETN3|E7ETN3_HUMAN;P00751|CFAB_HUMAN;B4E1Z4|B4E1Z4_HUMAN			FALSE
ELDESLQVAER	52.06	1287.63	11	-0.9	644.822	2	15.5051	4650000	22000000	2870	20210602_HS_50ng_PLUG-8.raw	19	H0YAS8|H0YAS8_HUMAN;P10909|CLUS_HUMAN;H0YC35|H0YC35_HUMAN			FALSE
ELLDTVTAPQK	50.16	1213.66	11	-1.7	607.836	2	16.1355	517000	4240000	3332	20210526_HS_PLUG-2.raw	12	I3L4Z0|I3L4Z0_HUMAN;P36955|PEDF_HUMAN			FALSE
ELSYYSLEDLNNK	49.44	1586.75	13	2.5	794.386	2	21.0084	33500	616000	5021	20210526_HS_PLUG-2.raw	2	P01031|CO5_HUMAN			FALSE
ELTTEIDNNIEQISSYK	49.16	1995.96	17	0.9	998.994	2	22.3226	140000	2670000	5456	20210526_HS_PLUG-1.raw	2	#CONTAM#cont|000133|;#CONTAM#cont|000131|;P13645|K1C10_HUMAN;#CONTAM#cont|000129|;#CONTAM#cont|000136|;#CONTAM#cont|000122|;#CONTAM#cont|000130|			FALSE
EM(+15.99)SGSPASGIPVK	57.53	1274.62	13	-1.2	638.315	2	8.3424	3410000	9830000	1563	20210602_HS_50ng_PLUG-15.raw	14		Oxidation (M)		FALSE
ENFAGEATLQR	59.5	1234.59	11	1.6	618.305	2	13.7019	1410000	6800000	2518	20210602_HS_50ng_PLUG-8.raw	13	P04114|APOB_HUMAN			FALSE
ENFLFLTPDC(+57.02)K	58.2	1382.65	11	0	692.334	2	23.4281	951000	11300000	5035	20210602_HS_50ng_PLUG-12.raw	14	P01042|KNG1_HUMAN	Carbamidomethylation	C10:Carbamidomethylation:1000.00	FALSE
EPFLSC(+57.02)C(+57.02)QFAESLR	59.18	1742.78	14	-0.6	872.398	2	22.9829	119000	1170000	5676	20210526_HS_PLUG-1.raw	1		Carbamidomethylation; Carbamidomethylation	C6:Carbamidomethylation:1000.00;C7:Carbamidomethylation:1000.00	FALSE
EPQ(+0.98)VYTLPPSR	38	1286.65	11	-7	644.328	2	21.8647	45400	363000	4605	20210602_HS_50ng_PLUG-12.raw	1	P01859|IGHG2_HUMAN;P01857|IGHG1_HUMAN;A0A286YEY4|A0A286YEY4_HUMAN;A0A0A0MS08|A0A0A0MS08_HUMAN;A0A0A0MS07|A0A0A0MS07_HUMAN	Deamidation (NQ)		FALSE
EPQVYTLPPSR	67.78	1285.67	11	-8.2	643.835	2	16.6053	88400000	332000000	3219	20210602_HS_50ng_PLUG-5.raw	102	P01859|IGHG2_HUMAN;P01857|IGHG1_HUMAN;A0A286YEY4|A0A286YEY4_HUMAN;A0A0A0MS08|A0A0A0MS08_HUMAN;A0A0A0MS07|A0A0A0MS07_HUMAN			FALSE
EPQVYTLPPSRDELTK	46.25	1871.96	16	-1	624.997	3	18.7056	15500000	60200000	4266	20210526_HS_PLUG-1.raw	18	P01857|IGHG1_HUMAN;A0A0A0MS08|A0A0A0MS08_HUMAN;A0A0A0MS07|A0A0A0MS07_HUMAN			FALSE
EPQVYTLPPSREEM(+15.99)TK	38.35	1919.93	16	-6.3	640.982	3	15.7972	10600000	16700000	3293	20210526_HS_PLUG-1.raw	4	P01859|IGHG2_HUMAN;A0A286YEY4|A0A286YEY4_HUMAN	Oxidation (M)		FALSE
EQLGEFYEALDC(+57.02)LR	56.34	1741.8	14	2.1	871.912	2	25.8076	868000	9710000	6591	20210526_HS_PLUG-2.raw	4	P02763|A1AG1_HUMAN	Carbamidomethylation	C12:Carbamidomethylation:1000.00	FALSE
EQLGPVTQEFWDNLEK	40.48	1931.93	16	2.2	966.977	2	25.8276	1450000	12500000	6589	20210526_HS_PLUG-2.raw	3	F8W696|F8W696_HUMAN;P02647|APOA1_HUMAN			FALSE
EQLKAVM(+15.99)DDFAAFVEK	42.37	1855.9	16	-1.2	619.643	3	23.3424	90600	1700000	5736	20210526_HS_PLUG-3.raw	2	A0A0C4DGB6|A0A0C4DGB6_HUMAN;A0A087WWT3|A0A087WWT3_HUMAN;P02768|ALBU_HUMAN;C9JKR2|C9JKR2_HUMAN;D6RHD5|D6RHD5_HUMAN;B7WNR0|B7WNR0_HUMAN;H0YA55|H0YA55_HUMAN	Oxidation (M)		FALSE
EQLQDM(+15.99)GLVDLFSPEK	54.07	1863.89	16	2.1	932.959	2	25.0118	3910000	27100000	6338	20210526_HS_PLUG-2.raw	15	P01008|ANT3_HUMAN	Oxidation (M)		FALSE
EQLSLLDR	41.02	972.524	8	-1.5	487.269	2	16.8432	9860000	50400000	3190	20210602_HS_50ng_PLUG-8.raw	18	G3V595|G3V595_HUMAN;P01011|AACT_HUMAN			FALSE
ESQLPTVM(+15.99)DFR	43.6	1337.63	11	1.9	669.826	2	18.8009	1840000	12500000	4204	20210526_HS_PLUG-2.raw	11	A8MUN2|A8MUN2_HUMAN;P04114|APOB_HUMAN	Oxidation (M)		FALSE
ETAASLLQAGYK	60.23	1250.65	12	3.8	626.337	2	18.2056	2000000	26400000	3998	20210526_HS_PLUG-2.raw	15	P00734|THRB_HUMAN			FALSE
ETLFSVM(+15.99)PGLK	49.18	1236.64	11	0.7	619.329	2	20.9769	2340000	23900000	4341	20210602_HS_50ng_PLUG-9.raw	12	Q14624|ITIH4_HUMAN;B7ZKJ8|B7ZKJ8_HUMAN;H7C0L5|H7C0L5_HUMAN	Oxidation (M)		FALSE
ETLLQDFR	52.68	1020.52	8	-0.2	511.269	2	19.2706	1970000	17500000	3908	20210602_HS_50ng_PLUG-5.raw	12	P02760|AMBP_HUMAN;S4R471|S4R471_HUMAN;S4R3Y4|S4R3Y4_HUMAN			FALSE
ETYGEM(+15.99)ADC(+57.02)C(+57.02)AK	69.79	1449.52	12	-2.5	725.769	2	4.7701	22900000	63800000	640	20210526_HS_PLUG-2.raw	119	A0A0C4DGB6|A0A0C4DGB6_HUMAN;A0A087WWT3|A0A087WWT3_HUMAN;P02768|ALBU_HUMAN;H7C013|H7C013_HUMAN	Oxidation (M); Carbamidomethylation; Carbamidomethylation	C9:Carbamidomethylation:1000.00;C10:Carbamidomethylation:1000.00	FALSE
EVAFDLEIPK	50.85	1159.61	10	2.5	580.815	2	22.8619	3600000	12900000	4991	20210602_HS_50ng_PLUG-5.raw	15	P19827|ITIH1_HUMAN;F8WAS2|F8WAS2_HUMAN			FALSE
EVGPTNADPVC(+57.02)LAK	67.98	1469.72	14	1.3	735.867	2	16.9461	2060000	17500000	3264	20210602_HS_50ng_PLUG-5.raw	15	E9PFZ2|E9PFZ2_HUMAN;H7C5R1|H7C5R1_HUMAN;P00450|CERU_HUMAN	Carbamidomethylation	C11:Carbamidomethylation:1000.00	FALSE
EVGTPHGIILDSVDAAFIC(+57.02)PGSSR	54.41	2497.23	24	1.7	833.421	3	25.8715	1450000	15000000	6583	20210526_HS_PLUG-1.raw	3	P02790|HEMO_HUMAN	Carbamidomethylation	C19:Carbamidomethylation:1000.00	FALSE
EVGTVLSQVYSK	53.84	1308.69	12	-0.6	655.356	2	18.422	1530000	15500000	4070	20210526_HS_PLUG-2.raw	14	P04114|APOB_HUMAN			FALSE
EVPLNTIIFM(+15.99)GR	41.9	1404.74	12	2.6	703.381	2	23.4928	1650000	19000000	5076	20210602_HS_50ng_PLUG-6.raw	12	P01008|ANT3_HUMAN;Q8TCE1|Q8TCE1_HUMAN	Oxidation (M)		FALSE
EVQGFESATFLGYFK	47.69	1721.83	15	1.2	861.927	2	26.6131	140000	1780000	6849	20210526_HS_PLUG-2.raw	3	A0A0A0MS51|A0A0A0MS51_HUMAN;P06396|GELS_HUMAN;A0A0A0MT01|A0A0A0MT01_HUMAN			FALSE
EVQLVE(+21.98)SGGGLVQPGGSLR	52.95	1902.98	19	-1.6	635.335	3	21.0304	697000	11800000	5023	20210526_HS_PLUG-2.raw	12		Sodium adduct	E6:Sodium adduct:41.87	FALSE
EVQLVESGGGLVQ(+0.98)PGGSLR	39.32	1881.98	19	9.8	942.01	2	21.6758			5256	20210526_HS_PLUG-2.raw	1		Deamidation (NQ)	Q13:Deamidation (NQ):11.91	FALSE
EVQLVESGGGLVQPGGSLR	74.85	1881	19	1.9	941.511	2	21.0304	12400000	160000000	5004	20210526_HS_PLUG-2.raw	31				FALSE
EVQPVELPNC(+57.02)NLVK	26.86	1637.84	14	2.7	819.935	2	20.5505	70600	1080000	4798	20210526_HS_PLUG-1.raw	1	P27169|PON1_HUMAN	Carbamidomethylation	C10:Carbamidomethylation:1000.00	FALSE
EVVADSVWVDVK	52.93	1344.69	12	1.8	673.357	2	20.9538	1430000	13100000	4981	20210526_HS_PLUG-2.raw	3	P01024|CO3_HUMAN			FALSE
EVVSLTEAC(+57.02)C(+57.02)AEGADPDC(+57.02)YDTR	45.56	2517.01	22	0.6	1259.52	2	18.9946	75700	1520000	4280	20210526_HS_PLUG-2.raw	2	D6RBJ7|D6RBJ7_HUMAN;P02774|VTDB_HUMAN;D6RF20|D6RF20_HUMAN;D6RF35|D6RF35_HUMAN	Carbamidomethylation; Carbamidomethylation; Carbamidomethylation	C9:Carbamidomethylation:1000.00;C10:Carbamidomethylation:1000.00;C18:Carbamidomethylation:1000.00	FALSE
EVYGFNPEGK	47.07	1138.53	10	4	570.274	2	14.6489	527000	2800000	2748	20210602_HS_50ng_PLUG-7.raw	7	A8MUN2|A8MUN2_HUMAN;A0A669KB70|A0A669KB70_HUMAN;P04114|APOB_HUMAN			FALSE
EYSGTIASEAN(+0.98)TYLNSK	26.45	1847.84	17	5	924.933	2	19.4585	26700	484000	3995	20210602_HS_50ng_PLUG-5.raw	1	P04114|APOB_HUMAN	Deamidation (NQ)	N11:Deamidation (NQ):0.00	FALSE
EYSGTIASEANTYLNSK	43.59	1846.86	17	1.3	924.441	2	19.4907	57000	1020000	4373	20210526_HS_PLUG-3.raw	2	P04114|APOB_HUMAN			FALSE
EYTDASFTNR	51.92	1202.52	10	-1.2	602.267	2	7.5029	1330000	5350000	1382	20210602_HS_50ng_PLUG-8.raw	13	E9PFZ2|E9PFZ2_HUMAN;H7C5R1|H7C5R1_HUMAN;P00450|CERU_HUMAN			FALSE
EYVLPSFEVIVEPTEK	68.16	1877.97	16	2.4	939.996	2	26.7582	957000	9080000	6885	20210526_HS_PLUG-2.raw	3	P01024|CO3_HUMAN			FALSE
FAFNLYR	37.42	929.476	7	-1.6	465.746	2	21.4288	148000	2220000	5104	20210526_HS_PLUG-1.raw	4	P05546|HEP2_HUMAN			FALSE
FAHYVVTSQVVNTANEAR	71.81	2005	18	1.9	669.345	3	18.6803	422000	6510000	4166	20210526_HS_PLUG-2.raw	2	P19827|ITIH1_HUMAN;F8WAS2|F8WAS2_HUMAN			FALSE
FATTFYQHLADSK	59.77	1527.74	13	1.1	510.255	3	19.5854	1200000	16900000	4493	20210526_HS_PLUG-2.raw	7	P01008|ANT3_HUMAN;Q8TCE1|Q8TCE1_HUMAN			FALSE
FDEFFSE(+21.98)GC(+57.02)APGSK	27.94	1598.63	14	0.9	533.887	3	19.4305	39100	506000	4346	20210526_HS_PLUG-3.raw	1	H7C5E8|H7C5E8_HUMAN;P02787|TRFE_HUMAN	Sodium adduct; Carbamidomethylation	E7:Sodium adduct:5.25;C9:Carbamidomethylation:1000.00	FALSE
FDEFFSEGC(+57.02)APGSK	73.34	1576.65	14	5.6	789.337	2	20.7229	13000000	210000000	4355	20210602_HS_50ng_PLUG-5.raw	60	H7C5E8|H7C5E8_HUMAN;P02787|TRFE_HUMAN	Carbamidomethylation	C9:Carbamidomethylation:1000.00	FALSE
FEDGVLDPDYPR	64.21	1421.65	12	-0.6	711.83	2	19.2824	4530000	39100000	3849	20210602_HS_50ng_PLUG-15.raw	16	P04004|VTNC_HUMAN			FALSE
FEVQVTVPK	57.7	1045.58	9	0.8	523.798	2	19.2706	9920000	101000000	3895	20210602_HS_50ng_PLUG-5.raw	14	P01023|A2MG_HUMAN			FALSE
FFESFGDLSTPDAVM(+15.99)GNPK	45.94	2073.94	19	0.7	1037.98	2	23.3392	257000	3360000	5846	20210526_HS_PLUG-2.raw	3	F8W6P5|F8W6P5_HUMAN;P68871|HBB_HUMAN;A0A2R8Y7R2|A0A2R8Y7R2_HUMAN	Oxidation (M)		FALSE
FKDLGEENFK	59.22	1225.6	10	-1.4	613.805	2	14.8575	104000000	749000000	2905	20210602_HS_50ng_PLUG-5.raw	161	A0A0C4DGB6|A0A0C4DGB6_HUMAN;A0A087WWT3|A0A087WWT3_HUMAN;P02768|ALBU_HUMAN;H7C013|H7C013_HUMAN;C9JKR2|C9JKR2_HUMAN;B7WNR0|B7WNR0_HUMAN			FALSE
FLEQQNQVLQTK	66.93	1474.78	12	2.4	738.401	2	16.3667	3670000	24600000	3392	20210526_HS_PLUG-2.raw	15	#CONTAM#cont|000132|;P35908|K22E_HUMAN;#CONTAM#cont|000135|;#CONTAM#cont|000134|;P04264|K2C1_HUMAN			FALSE
FLVNLVK	31.99	831.522	7	0.5	416.77	2	20.8945	59000	723000	4984	20210526_HS_PLUG-2.raw	2	P43652|AFAM_HUMAN			FALSE
FN(+0.98)WYVDGVEVHNAK	43.73	1677.78	14	4.7	560.272	3	21.8582	959000	16400000	5345	20210526_HS_PLUG-2.raw	3	P01857|IGHG1_HUMAN;A0A0A0MS08|A0A0A0MS08_HUMAN	Deamidation (NQ)	N2:Deamidation (NQ):24.88	FALSE
FNAVLTNPQGDYDTSTGK	72.98	1926.9	18	2.5	964.462	2	18.2034	1560000	16900000	3991	20210526_HS_PLUG-2.raw	14	P02747|C1QC_HUMAN			FALSE
FNWYVDGVEVHNAK	55.38	1676.79	14	4.1	559.941	3	21.4038	10600000	60000000	4549	20210602_HS_50ng_PLUG-4.raw	31	P01857|IGHG1_HUMAN;A0A0A0MS08|A0A0A0MS08_HUMAN			FALSE
FPEVDVLTK	55.85	1046.56	9	-0.1	524.29	2	20.0979	4040000	52200000	4184	20210602_HS_50ng_PLUG-5.raw	17	P04114|APOB_HUMAN			FALSE
FPKAEFAEVSK	56.12	1251.65	11	1.2	418.226	3	16.9964	189000	1680000	3587	20210526_HS_PLUG-2.raw	3	A0A0C4DGB6|A0A0C4DGB6_HUMAN;P02768|ALBU_HUMAN;C9JKR2|C9JKR2_HUMAN;D6RHD5|D6RHD5_HUMAN;B7WNR0|B7WNR0_HUMAN;H0YA55|H0YA55_HUMAN			FALSE
FPSGTFEQVSQLVK	40.98	1565.81	14	2	783.916	2	23.6922	72300	1280000	5925	20210526_HS_PLUG-1.raw	2	D6RBJ7|D6RBJ7_HUMAN;P02774|VTDB_HUMAN;D6RF20|D6RF20_HUMAN;D6RF35|D6RF35_HUMAN			FALSE
FQN(+0.98)ALLVR	48.35	960.539	8	1.2	481.279	2	18.4047	32000000	271000000	4065	20210526_HS_PLUG-2.raw	27	A0A0C4DGB6|A0A0C4DGB6_HUMAN;A0A087WWT3|A0A087WWT3_HUMAN;P02768|ALBU_HUMAN;C9JKR2|C9JKR2_HUMAN;D6RHD5|D6RHD5_HUMAN;B7WNR0|B7WNR0_HUMAN;H0YA55|H0YA55_HUMAN	Deamidation (NQ)	N3:Deamidation (NQ):40.00	FALSE
FQNALLVR	57.16	959.555	8	-6.7	480.782	2	17.4665	719000000	3880000000	3486	20210602_HS_50ng_PLUG-12.raw	445	A0A0C4DGB6|A0A0C4DGB6_HUMAN;A0A087WWT3|A0A087WWT3_HUMAN;P02768|ALBU_HUMAN;C9JKR2|C9JKR2_HUMAN;D6RHD5|D6RHD5_HUMAN;B7WNR0|B7WNR0_HUMAN;H0YA55|H0YA55_HUMAN			FALSE
FQNSAILTIQPK	38.07	1358.76	12	5.7	680.392	2	19.9133	83300	1220000	4621	20210526_HS_PLUG-2.raw	2	P01031|CO5_HUMAN			FALSE
FQPTLLTLPR	59.38	1184.69	10	0.2	593.356	2	23.6238	6020000	51500000	5919	20210526_HS_PLUG-2.raw	15	H9KV48|H9KV48_HUMAN;P05155|IC1_HUMAN;E9PGN7|E9PGN7_HUMAN			FALSE
FQSVFTVTR	50.48	1083.57	9	4.1	542.797	2	19.1481	500000	7350000	4329	20210526_HS_PLUG-2.raw	14	P02747|C1QC_HUMAN			FALSE
FSAIC(+57.02)QGDGTWSPR	67	1580.7	14	-1.1	791.362	2	18.7306	120000	1500000	4179	20210526_HS_PLUG-2.raw	3	P04003|C4BPA_HUMAN	Carbamidomethylation	C5:Carbamidomethylation:1000.00	FALSE
FSGSGSGTDFTLK	63.89	1302.61	13	-0.1	652.312	2	16.7085	9540000	54300000	3201	20210602_HS_50ng_PLUG-12.raw	13				FALSE
FSGSGSGTDFTLTISR	74.57	1631.78	16	3.5	816.903	2	20.7626	2720000	22400000	4906	20210526_HS_PLUG-2.raw	6				FALSE
FSGSNSGN(+0.98)TATLTISR	45.08	1612.77	16	-1.1	807.394	2	15.3779	68600	896000	3081	20210526_HS_PLUG-3.raw	3		Deamidation (NQ)	N8:Deamidation (NQ):7.07	FALSE
FSGSNSGNTATLTISR	75.53	1611.79	16	3.7	806.903	2	15.6653	2230000	13500000	2921	20210602_HS_50ng_PLUG-13.raw	15				FALSE
FSPATHPSEGLEENYC(+57.02)R	38.63	1992.86	17	2.8	665.3	3	16.3159	86900	1060000	3384	20210526_HS_PLUG-2.raw	1	P00747|PLMN_HUMAN	Carbamidomethylation	C16:Carbamidomethylation:1000.00	FALSE
FTC(+57.02)TVTHTDLPSPLK	47.17	1715.86	15	2.3	858.94	2	19.7373	631000	6300000	4458	20210526_HS_PLUG-3.raw	4	P01871|IGHM_HUMAN	Carbamidomethylation	C3:Carbamidomethylation:1000.00	FALSE
FTFEYSR	26.64	948.434	7	-1.3	475.224	2	17.2759	32700	629000	3295	20210602_HS_50ng_PLUG-8.raw	2	P43652|AFAM_HUMAN			FALSE
FVTVQATFGTQVVEK	39.07	1652.88	15	4.2	827.453	2	21.5327	24100	472000	5154	20210526_HS_PLUG-1.raw	1	P01024|CO3_HUMAN			FALSE
FYNQVSTPLLR	71.46	1336.71	11	4.6	669.367	2	20.5653	1550000	17000000	4180	20210602_HS_50ng_PLUG-14.raw	14	#CONTAM#cont|000108|;Q5T985|Q5T985_HUMAN;P19823|ITIH2_HUMAN			FALSE
FYYIYNEK	51.17	1138.53	8	2	570.275	2	18.1762	10700000	42100000	3544	20210602_HS_50ng_PLUG-15.raw	18	P01024|CO3_HUMAN			FALSE
GAYPLSIEPIGVR	64.35	1370.76	13	3.5	686.388	2	22.9388	5720000	55900000	4813	20210602_HS_50ng_PLUG-14.raw	16	E9PFZ2|E9PFZ2_HUMAN;H7C5R1|H7C5R1_HUMAN;P00450|CERU_HUMAN			FALSE
GDATVFFILPNQGK	29.52	1505.79	14	5.3	753.908	2	24.9315	25700	344000	6248	20210526_HS_PLUG-3.raw	1	P29622|KAIN_HUMAN			FALSE
GDTFSC(+57.02)M(+15.99)VGHEALPLAFTQK	58.77	2224.03	20	0.8	742.354	3	23.2492	511000	6240000	5708	20210526_HS_PLUG-3.raw	3	P01876|IGHA1_HUMAN;A0A286YEY1|A0A286YEY1_HUMAN	Carbamidomethylation; Oxidation (M)	C6:Carbamidomethylation:1000.00	FALSE
GEC(+57.02)Q(+0.98)AEGVLFFQGDR	41.14	1712.75	15	9.3	857.388	2	21.6382	77100	1590000	4612	20210602_HS_50ng_PLUG-4.raw	3	P02790|HEMO_HUMAN;Q9BS19|Q9BS19_HUMAN	Carbamidomethylation; Deamidation (NQ)	C3:Carbamidomethylation:1000.00;Q4:Deamidation (NQ):81.34	FALSE
GEC(+57.02)QAEGVLFFQGDR	59.04	1711.76	15	3.1	856.891	2	21.6408	2050000	13900000	4585	20210602_HS_50ng_PLUG-8.raw	16	P02790|HEMO_HUMAN;Q9BS19|Q9BS19_HUMAN	Carbamidomethylation	C3:Carbamidomethylation:1000.00	FALSE
GEC(+57.02)VPGEQEPEPILIPR	52.78	1918.95	17	5.1	960.489	2	21.6361	81300	1710000	5237	20210526_HS_PLUG-2.raw	2	P02760|AMBP_HUMAN;S4R471|S4R471_HUMAN	Carbamidomethylation	C3:Carbamidomethylation:1000.00	FALSE
GEVQAM(+15.99)LGQSTEELR	62.54	1662.79	15	1.1	832.406	2	16.7244	211000	2130000	3505	20210526_HS_PLUG-2.raw	3	E7ERP7|E7ERP7_HUMAN;E9PEV4|E9PEV4_HUMAN;P02649|APOE_HUMAN;H0Y7L5|H0Y7L5_HUMAN	Oxidation (M)		FALSE
GFEPTLEALFGK	57.75	1307.68	12	2.5	654.85	2	26.7665	533000	4940000	6882	20210526_HS_PLUG-2.raw	3	A8MUN2|A8MUN2_HUMAN;P04114|APOB_HUMAN			FALSE
GFSLDEATNLN(+0.98)GGLLR	44.16	1676.84	16	2.6	839.431	2	24.1299	230000	3080000	6073	20210526_HS_PLUG-1.raw	3	P19827|ITIH1_HUMAN	Deamidation (NQ)	N11:Deamidation (NQ):32.28	FALSE
GFYPSDIAVE(+21.98)WESN(+0.98)GQPENNYK	35.4	2566.09	22	2.1	856.376	3	24.1017	73300	649000	6074	20210526_HS_PLUG-1.raw	1	P01857|IGHG1_HUMAN;A0A0A0MS08|A0A0A0MS08_HUMAN;A0A0A0MS07|A0A0A0MS07_HUMAN	Sodium adduct; Deamidation (NQ)	E10:Sodium adduct:0.00;N14:Deamidation (NQ):11.10	FALSE
GFYPSDIAVEWE(+21.98)SN(+0.98)GQPENNYK	40.81	2566.09	22	1.9	856.375	3	24.1456	70100	901000	6001	20210526_HS_PLUG-3.raw	1	P01857|IGHG1_HUMAN;A0A0A0MS08|A0A0A0MS08_HUMAN;A0A0A0MS07|A0A0A0MS07_HUMAN	Sodium adduct; Deamidation (NQ)	E12:Sodium adduct:0.00;N14:Deamidation (NQ):14.04	FALSE
GFYPSDIAVEWESN(+0.98)GQPENNYK	46.24	2544.11	22	-0.1	849.046	3	24.0669	1370000	4570000	6054	20210526_HS_PLUG-1.raw	5	P01857|IGHG1_HUMAN;A0A0A0MS08|A0A0A0MS08_HUMAN;A0A0A0MS07|A0A0A0MS07_HUMAN	Deamidation (NQ)	N14:Deamidation (NQ):8.22	FALSE
GGEGTGYFVDFSVR	51.23	1489.68	14	-1.8	745.851	2	22.4806	89900	1150000	5516	20210526_HS_PLUG-1.raw	1	P04196|HRG_HUMAN			FALSE
GGYTLVSGYPK	59.89	1140.58	11	-3.5	571.296	2	17.3205	12200000	93200000	3263	20210602_HS_50ng_PLUG-14.raw	22	P02790|HEMO_HUMAN			FALSE
GHFSISIPVK	62.59	1083.61	10	4.8	542.816	2	20.4074	719000	7650000	4787	20210526_HS_PLUG-2.raw	5	P01023|A2MG_HUMAN			FALSE
GIISALLVPPETEEAK	45.29	1665.92	16	3.6	556.318	3	25.0469	1430000	6410000	6269	20210526_HS_PLUG-3.raw	5	A8MUN2|A8MUN2_HUMAN;P04114|APOB_HUMAN			FALSE
GISTSAASPAVGTVGM(+15.99)DM(+15.99)DEDDDFSK	58.9	2634.09	26	-0.2	879.042	3	18.1998	280000	3790000	3908	20210526_HS_PLUG-3.raw	2	P04114|APOB_HUMAN	Oxidation (M); Oxidation (M)		FALSE
GLC(+57.02)VATPVQLR	69.66	1212.66	11	4.4	607.342	2	19.9828	1570000	18800000	4113	20210602_HS_50ng_PLUG-10.raw	9		Carbamidomethylation	C3:Carbamidomethylation:1000.00	FALSE
GLETSLAEC(+57.02)TFTK	59.05	1455.69	13	1.8	728.857	2	19.3588	191000	2460000	4365	20210526_HS_PLUG-1.raw	5	G3XAM2|G3XAM2_HUMAN;A0A2R8Y3M9|A0A2R8Y3M9_HUMAN;E7ETH0|E7ETH0_HUMAN;P05156|CFAI_HUMAN	Carbamidomethylation	C9:Carbamidomethylation:1000.00	FALSE
GLEVTITAR	45.19	958.545	9	-0.3	480.281	2	16.1419	1290000	6560000	3329	20210526_HS_PLUG-1.raw	10	P01024|CO3_HUMAN			FALSE
GLEWVANIK	44.67	1028.57	9	-0.3	515.29	2	21.3125	174000	3050000	4492	20210602_HS_50ng_PLUG-8.raw	6				FALSE
GPDVLTATVSGK	39.48	1143.61	12	2.5	572.816	2	14.7268	318000	1140000	2780	20210602_HS_50ng_PLUG-12.raw	4	Q14624|ITIH4_HUMAN;B7ZKJ8|B7ZKJ8_HUMAN;H7C0L5|H7C0L5_HUMAN			FALSE
GPSVFPLAPC(+57.02)SR	65.14	1286.64	12	-1.3	644.328	2	20.2686	28200000	232000000	4214	20210602_HS_50ng_PLUG-10.raw	22	P01859|IGHG2_HUMAN;A0A286YEY4|A0A286YEY4_HUMAN	Carbamidomethylation	C10:Carbamidomethylation:1000.00	FALSE
GPSVFPLAPSSK	68.66	1185.64	12	2.8	593.829	2	19.3374	81500000	1040000000	3876	20210602_HS_50ng_PLUG-15.raw	120	P01857|IGHG1_HUMAN;A0A0A0MS08|A0A0A0MS08_HUMAN;A0A0A0MS07|A0A0A0MS07_HUMAN			FALSE
GQELC(+57.02)ADYSENTFTEYK	76.59	2053.86	17	0.3	1027.94	2	19.2865	742000	11100000	4287	20210526_HS_PLUG-3.raw	9	P02774|VTDB_HUMAN;D6RF35|D6RF35_HUMAN	Carbamidomethylation	C5:Carbamidomethylation:1000.00	FALSE
GQGTLSVVTM(+15.99)YHAK	49.94	1506.75	14	-0.4	503.257	3	16.3639	2500000	9440000	3135	20210602_HS_50ng_PLUG-12.raw	6	P01024|CO3_HUMAN;M0QYC8|M0QYC8_HUMAN	Oxidation (M)		FALSE
GSFEFPVGDAVSK	68.1	1338.65	13	0.6	670.33	2	20.7809	6020000	56300000	4359	20210602_HS_50ng_PLUG-5.raw	15				FALSE
GSFPWQAK	56.02	919.455	8	-0.7	460.735	2	17.4641	14300000	72900000	3342	20210602_HS_50ng_PLUG-13.raw	23	P00738|HPT_HUMAN;A0A087WU08|A0A087WU08_HUMAN;H0Y300|H0Y300_HUMAN;A0A0C4DGL8|A0A0C4DGL8_HUMAN;J3QR68|J3QR68_HUMAN			FALSE
GSLVQASEANLQAAQDFVR	67.96	2003.01	19	-0.1	1002.51	2	23.5927	296000	6780000	5928	20210526_HS_PLUG-2.raw	3	P19827|ITIH1_HUMAN			FALSE
GSPAINVAVHVFR	58.54	1365.75	13	-0.7	456.259	3	21.2636	948000	10600000	5049	20210526_HS_PLUG-1.raw	3	P02766|TTHY_HUMAN;A0A087WT59|A0A087WT59_HUMAN			FALSE
GTEAAGAM(+15.99)FLE(+21.98)AIPM(+15.99)SIPPEVK	46.04	2312.1	22	-1.6	771.711	3	26.0832	264000	1300000	6646	20210526_HS_PLUG-2.raw	3		Oxidation (M); Sodium adduct; Oxidation (M)	M8:Oxidation (M):1000.00;E11:Sodium adduct:13.67;M15:Oxidation (M):1000.00	FALSE
GTEAAGAM(+15.99)FLEAIPM(+15.99)SIPPEVK	49.26	2290.12	22	-4.9	764.381	3	25.9634	1360000	6820000	6559	20210526_HS_PLUG-3.raw	6		Oxidation (M); Oxidation (M)		FALSE
GVALHRPDVYLLPPAR	59.4	1773	16	-0.5	444.26	4	21.567	275000	3690000	5113	20210526_HS_PLUG-3.raw	4	P01871|IGHM_HUMAN			FALSE
GVTSVSQIFHSPDLAIR	54.59	1825.97	17	3.3	913.998	2	24.4319	226000	2830000	6193	20210526_HS_PLUG-2.raw	3	H9KV48|H9KV48_HUMAN;P05155|IC1_HUMAN;E9PGN7|E9PGN7_HUMAN			FALSE
GYTQQLAFR	63.04	1082.55	9	2.3	542.284	2	16.6247	7210000	41000000	3161	20210602_HS_50ng_PLUG-10.raw	16	P01024|CO3_HUMAN			FALSE
HLSLLTTLSNR	64.95	1253.71	11	0.4	418.912	3	20.4074	82200	826000	4807	20210526_HS_PLUG-2.raw	2	D6RBJ7|D6RBJ7_HUMAN;P02774|VTDB_HUMAN;D6RF35|D6RF35_HUMAN			FALSE
HNVYIN(+0.98)GITYTPVSSTNEK	76.41	2137.03	19	0.6	713.355	3	19.4335	1690000	29800000	4434	20210526_HS_PLUG-2.raw	18	P01023|A2MG_HUMAN	Deamidation (NQ)	N6:Deamidation (NQ):33.81	FALSE
HPDYSVVLLLR	59.53	1310.73	11	1.2	437.921	3	23.7549	1120000	9180000	5978	20210526_HS_PLUG-2.raw	6	A0A0C4DGB6|A0A0C4DGB6_HUMAN;P02768|ALBU_HUMAN;C9JKR2|C9JKR2_HUMAN;D6RHD5|D6RHD5_HUMAN;B7WNR0|B7WNR0_HUMAN;H0YA55|H0YA55_HUMAN			FALSE
HPYFYAPELLFFAK	72.27	1741.89	14	4.1	581.641	3	29.5454	412000	2150000	7468	20210526_HS_PLUG-2.raw	3	A0A0C4DGB6|A0A0C4DGB6_HUMAN;P02768|ALBU_HUMAN;H7C013|H7C013_HUMAN;D6RHD5|D6RHD5_HUMAN;B7WNR0|B7WNR0_HUMAN;H0YA55|H0YA55_HUMAN			FALSE
HQPQEFPTYVEPTNDEIC(+57.02)EAFR	78.61	2706.2	22	3.4	903.081	3	23.5692	204000	3640000	5917	20210526_HS_PLUG-2.raw	2	D6RBJ7|D6RBJ7_HUMAN;P02774|VTDB_HUMAN;D6RF35|D6RF35_HUMAN	Carbamidomethylation	C18:Carbamidomethylation:1000.00	FALSE
HSTIFENLANK	71.85	1272.65	11	-0.4	637.333	2	17.045	19700000	89300000	3601	20210526_HS_PLUG-2.raw	35	C9JVG0|C9JVG0_HUMAN;P02787|TRFE_HUMAN			FALSE
HTFM(+15.99)GVVSLGSPSGEVSHPR	75.49	2096.01	20	4.8	525.015	4	18.7439	558000	6080000	4180	20210526_HS_PLUG-2.raw	5	P02765|FETUA_HUMAN;C9JV77|C9JV77_HUMAN	Oxidation (M)		FALSE
IAELSATAQEIIK	55.91	1385.78	13	2.5	693.897	2	20.7781	949000	10600000	4323	20210602_HS_50ng_PLUG-6.raw	13	P04114|APOB_HUMAN			FALSE
IAPQLSTEELVSLGEK	69.88	1712.92	16	4.3	857.474	2	23.0909	408000	6140000	5657	20210526_HS_PLUG-3.raw	3	P43652|AFAM_HUMAN			FALSE
IAQWQSFQLEGGLK	67.07	1603.84	14	2.8	802.931	2	23.5486	2830000	26500000	5857	20210526_HS_PLUG-1.raw	13	P01023|A2MG_HUMAN			FALSE
IASFSQNC(+57.02)DIYPGK	66.46	1598.74	14	2.1	800.382	2	17.9886	2050000	22900000	3926	20210526_HS_PLUG-2.raw	15	P01042|KNG1_HUMAN	Carbamidomethylation	C8:Carbamidomethylation:1000.00	FALSE
IDDIWNLEVK	47.19	1243.64	10	3.6	622.834	2	23.1614	599000	6460000	5737	20210526_HS_PLUG-1.raw	8	P04114|APOB_HUMAN			FALSE
IEC(+57.02)VSAETTEDC(+57.02)IAK	66.19	1724.76	15	-0.1	863.39	2	14.9486	29000000	198000000	2982	20210526_HS_PLUG-1.raw	24	P02787|TRFE_HUMAN	Carbamidomethylation; Carbamidomethylation	C3:Carbamidomethylation:1000.00;C12:Carbamidomethylation:1000.00	FALSE
IEDGFSLK	36.79	907.465	8	-0.7	454.74	2	15.7393	2450000	9680000	2893	20210602_HS_50ng_PLUG-14.raw	13	P01008|ANT3_HUMAN			FALSE
IEGNLIFDPNNYLPK	50.76	1745.9	15	2.1	873.962	2	26.0699	364000	4540000	6667	20210526_HS_PLUG-1.raw	3	A8MUN2|A8MUN2_HUMAN;P04114|APOB_HUMAN			FALSE
IEIPLPFGGK	53.44	1069.62	10	3.5	535.82	2	24.7443	2310000	16100000	6283	20210526_HS_PLUG-2.raw	10	P04114|APOB_HUMAN			FALSE
IFFYDSENPPASEVLR	60.39	1882.91	16	3.7	942.47	2	23.9165	665000	7290000	6039	20210526_HS_PLUG-2.raw	6	P27169|PON1_HUMAN			FALSE
IGQDGISTSATTNLK	76.03	1504.77	15	3.2	753.396	2	15.4423	2110000	15100000	2864	20210602_HS_50ng_PLUG-15.raw	15	P04114|APOB_HUMAN			FALSE
IITHPNFN(+0.98)GNTLDNDIM(+15.99)LIK	29.94	2299.15	20	1.8	767.396	3	24.3536	1030000	9400000	6201	20210526_HS_PLUG-1.raw	1	#CONTAM#cont|000144|;#CONTAM#cont|000142|;#CONTAM#cont|000023|;#CONTAM#cont|000143|;#CONTAM#cont|000141|;#CONTAM#cont|000040|;#CONTAM#cont|000032|	Deamidation (NQ); Oxidation (M)	N8:Deamidation (NQ):0.00;M17:Oxidation (M):1000.00	FALSE
IITHPNFNGNTLDNDIM(+15.99)LIK	63.47	2298.17	20	-1.3	767.065	3	24.1133	399000	5630000	5992	20210526_HS_PLUG-3.raw	3	#CONTAM#cont|000144|;#CONTAM#cont|000142|;#CONTAM#cont|000023|;#CONTAM#cont|000143|;#CONTAM#cont|000141|;#CONTAM#cont|000040|;#CONTAM#cont|000032|	Oxidation (M)		FALSE
ILDDLSPR	42	927.503	8	-0.2	464.758	2	14.1645	2020000	6470000	2593	20210602_HS_50ng_PLUG-8.raw	13	Q14624|ITIH4_HUMAN;B7ZKJ8|B7ZKJ8_HUMAN;H7C0L5|H7C0L5_HUMAN			FALSE
ILGGHLDAK	36	922.524	9	-2.9	462.268	2	6.9232	1060000	3090000	1218	20210602_HS_50ng_PLUG-14.raw	9	P00738|HPT_HUMAN;A0A087WU08|A0A087WU08_HUMAN;H0Y300|H0Y300_HUMAN;A0A0C4DGL8|A0A0C4DGL8_HUMAN;J3QR68|J3QR68_HUMAN			FALSE
ILLQGTPVAQM(+15.99)TE(+21.98)DAVDAER	50.33	2194.06	20	3	732.364	3	20.9391	1540000	17400000	4934	20210526_HS_PLUG-1.raw	11	P01024|CO3_HUMAN	Oxidation (M); Sodium adduct	M11:Oxidation (M):1000.00;E13:Sodium adduct:17.01	FALSE
ILLQGTPVAQM(+15.99)TEDAVDAER	69.4	2172.07	20	-0.9	725.031	3	21.0132	20900000	196000000	4291	20210602_HS_50ng_PLUG-14.raw	30	P01024|CO3_HUMAN	Oxidation (M)		FALSE
IM(+15.99)N(+0.98)GEADAM(+15.99)SLDGGFVYIAGK	54.37	2190.98	21	-2	731.333	3	22.6285	1690000	13100000	4737	20210602_HS_50ng_PLUG-14.raw	8	P02787|TRFE_HUMAN	Oxidation (M); Deamidation (NQ); Oxidation (M)		FALSE
IM(+15.99)NGEADAM(+15.99)SLDGGFVYIAGK	58.56	2190	21	0.2	1096.01	2	22.3885	1220000	17000000	5510	20210526_HS_PLUG-2.raw	18	P02787|TRFE_HUMAN	Oxidation (M); Oxidation (M)		FALSE
IPIEDGSGE(+21.98)VVLSR	28.93	1491.75	14	-2.8	498.259	3	18.7124	179000	2140000	4142	20210526_HS_PLUG-1.raw	2	P01024|CO3_HUMAN	Sodium adduct	E9:Sodium adduct:11.12	FALSE
IPIEDGSGEVVLSR	58.21	1469.77	14	3.6	735.899	2	18.4748	5980000	48700000	4075	20210526_HS_PLUG-2.raw	31	P01024|CO3_HUMAN			FALSE
IPLDLVPK	40.5	893.559	8	-0.9	447.786	2	20.1956	866000	11100000	4083	20210602_HS_50ng_PLUG-14.raw	15	P01031|CO5_HUMAN			FALSE
IPSVQINFK	52.61	1044.6	9	3.6	523.31	2	20.533	1030000	12600000	4790	20210526_HS_PLUG-1.raw	3	P04114|APOB_HUMAN			FALSE
IQNILTEEPK	50.17	1183.64	10	1.4	592.831	2	16.7062	3530000	20200000	3197	20210602_HS_50ng_PLUG-4.raw	15	P27169|PON1_HUMAN			FALSE
IQPSGGTNINEALLR	65.01	1581.85	15	2.7	791.933	2	19.2354	6350000	72400000	3886	20210602_HS_50ng_PLUG-5.raw	15	#CONTAM#cont|000108|;Q5T985|Q5T985_HUMAN;P19823|ITIH2_HUMAN			FALSE
ISLPESLK	42.67	885.517	8	1.1	443.768	2	18.223	15200000	103000000	3986	20210526_HS_PLUG-2.raw	15	P01024|CO3_HUMAN			FALSE
ITENDIQIALDDAK	66.53	1557.79	14	0.2	779.902	2	21.3181	1530000	21400000	4501	20210602_HS_50ng_PLUG-10.raw	15	P04114|APOB_HUMAN			FALSE
ITLLSALVETR	57.35	1214.72	11	3.2	608.371	2	25.1822	3030000	27300000	5418	20210602_HS_50ng_PLUG-10.raw	15	G3V3A0|G3V3A0_HUMAN;P01011|AACT_HUMAN			FALSE
ITLPDFR	42.96	860.476	7	-0.7	431.245	2	20.4407	1940000	17400000	4270	20210602_HS_50ng_PLUG-5.raw	15	P04114|APOB_HUMAN			FALSE
IVIEYVDR	42.39	1005.55	8	-0.8	503.782	2	17.2525	1140000	8940000	3296	20210602_HS_50ng_PLUG-8.raw	14	G3XAM2|G3XAM2_HUMAN;A0A2R8Y3M9|A0A2R8Y3M9_HUMAN;E7ETH0|E7ETH0_HUMAN;P05156|CFAI_HUMAN			FALSE
IVQILPWEQNEQVK	50	1722.93	14	1.2	862.477	2	23.6479	467000	6590000	5913	20210526_HS_PLUG-1.raw	9	A8MUN2|A8MUN2_HUMAN;P04114|APOB_HUMAN			FALSE
IVSSAM(+15.99)EPDREYHFGQAVR	39.56	2207.04	19	4.4	552.773	4	16.9363	547000	6220000	3547	20210526_HS_PLUG-1.raw	3	A0A0D9SG88|A0A0D9SG88_HUMAN;P08603|CFAH_HUMAN	Oxidation (M)		FALSE
IWDVVEK	38.27	887.475	7	-2.7	444.745	2	16.0157	1730000	5810000	3298	20210526_HS_PLUG-2.raw	9	P01024|CO3_HUMAN			FALSE
KAADDTWEPFASGK	31.6	1521.71	14	3.1	508.247	3	17.7044	218000	1500000	3788	20210526_HS_PLUG-1.raw	2	P02766|TTHY_HUMAN;A0A087WT59|A0A087WT59_HUMAN			FALSE
KADGSYAAWLSR	25.8	1323.66	12	2.4	442.229	3	18.3408	30400	190000	4101	20210526_HS_PLUG-2.raw	1				FALSE
KC(+57.02)STSSLLEAC(+57.02)TFR	37.42	1658.78	14	4.3	553.937	3	18.8553	159000	2850000	4208	20210526_HS_PLUG-2.raw	4	P02787|TRFE_HUMAN	Carbamidomethylation; Carbamidomethylation	C2:Carbamidomethylation:1000.00;C11:Carbamidomethylation:1000.00	FALSE
KFPSGTFEQVSQLVK	46.92	1693.9	15	3.4	565.646	3	22.9509	1370000	7150000	5575	20210526_HS_PLUG-3.raw	3	D6RBJ7|D6RBJ7_HUMAN;P02774|VTDB_HUMAN;D6RF20|D6RF20_HUMAN;D6RF35|D6RF35_HUMAN			FALSE
KGDTFSC(+57.02)M(+15.99)VGHEALPLAFTQK	77.26	2352.12	21	2.2	785.054	3	22.342	338000	6750000	5488	20210526_HS_PLUG-2.raw	3	P01876|IGHA1_HUMAN;A0A286YEY1|A0A286YEY1_HUMAN	Carbamidomethylation; Oxidation (M)	C7:Carbamidomethylation:1000.00	FALSE
KGYTQQLAFR	26.45	1210.65	10	-4.5	606.33	2	14.9849	367000	621000	3040	20210526_HS_PLUG-2.raw	1	P01024|CO3_HUMAN			FALSE
KLSSWVLLM(+15.99)K	31.48	1219.7	10	0.6	610.86	2	21.1353	346000	3870000	5059	20210526_HS_PLUG-2.raw	3		Oxidation (M)		FALSE
KLVAASQAALGL	62.44	1140.69	12	-2.4	571.352	2	19.6988	27800000	288000000	4532	20210526_HS_PLUG-2.raw	26	A0A087WWT3|A0A087WWT3_HUMAN;P02768|ALBU_HUMAN;C9JKR2|C9JKR2_HUMAN;D6RHD5|D6RHD5_HUMAN;B7WNR0|B7WNR0_HUMAN;H0YA55|H0YA55_HUMAN			FALSE
KM(+15.99)TSNFPVDLSDYPK	41.36	1756.83	15	7.8	586.625	3	20.3835	101000	1180000	4695	20210526_HS_PLUG-3.raw	2	P04114|APOB_HUMAN	Oxidation (M)		FALSE
KPVDEYKDC(+57.02)HLAQ(+0.98)VPSHTVVAR	44.07	2549.27	22	6.9	510.867	5	16.8895			3537	20210526_HS_PLUG-1.raw	1	P02787|TRFE_HUMAN	Carbamidomethylation; Deamidation (NQ)	C9:Carbamidomethylation:1000.00	FALSE
KPVDEYKDC(+57.02)HLAQVPSHTVVAR	48.01	2548.29	22	-1.8	510.666	5	16.885	510000	6120000	3538	20210526_HS_PLUG-1.raw	2	P02787|TRFE_HUMAN	Carbamidomethylation	C9:Carbamidomethylation:1000.00	FALSE
KPVEEYANC(+57.02)HLAR	42.47	1585.77	13	-1.5	529.598	3	6.9972	936000	5620000	1427	20210526_HS_PLUG-2.raw	9	P02787|TRFE_HUMAN	Carbamidomethylation	C9:Carbamidomethylation:1000.00	FALSE
KQTALVELVK	50.76	1127.69	10	2.1	564.854	2	18.5207	141000000	1010000000	3645	20210602_HS_50ng_PLUG-8.raw	59	A0A0C4DGB6|A0A0C4DGB6_HUMAN;A0A087WWT3|A0A087WWT3_HUMAN;P02768|ALBU_HUMAN;C9JKR2|C9JKR2_HUMAN;D6RHD5|D6RHD5_HUMAN;B7WNR0|B7WNR0_HUMAN;H0YA55|H0YA55_HUMAN			FALSE
KSASDLTWDNLK	55.58	1376.69	12	2.4	459.908	3	17.879	683000	6220000	3900	20210526_HS_PLUG-2.raw	9	H7C5E8|H7C5E8_HUMAN;P02787|TRFE_HUMAN			FALSE
KVPQVSTPTLVE(+21.98)VSR	37.51	1660.91	15	-2.7	554.645	3	19.4274	16600000	136000000	4389	20210526_HS_PLUG-1.raw	19	A0A0C4DGB6|A0A0C4DGB6_HUMAN;#CONTAM#cont|000097|;#CONTAM#cont|000035|;A0A087WWT3|A0A087WWT3_HUMAN;P02768|ALBU_HUMAN;#CONTAM#cont|000017|;C9JKR2|C9JKR2_HUMAN;D6RHD5|D6RHD5_HUMAN;B7WNR0|B7WNR0_HUMAN;H0YA55|H0YA55_HUMAN	Sodium adduct	E12:Sodium adduct:26.52	FALSE
KVPQVSTPTLVEVSR	77.82	1638.93	15	3.6	547.319	3	22.1003	406000000	7600000000	4134	20210602_HS_50ng_PLUG-5.raw	391	A0A0C4DGB6|A0A0C4DGB6_HUMAN;#CONTAM#cont|000097|;#CONTAM#cont|000035|;A0A087WWT3|A0A087WWT3_HUMAN;P02768|ALBU_HUMAN;#CONTAM#cont|000017|;C9JKR2|C9JKR2_HUMAN;D6RHD5|D6RHD5_HUMAN;B7WNR0|B7WNR0_HUMAN;H0YA55|H0YA55_HUMAN			FALSE
KYLYEIAR	46.77	1054.58	8	0.7	528.3	2	15.2932	33900000	200000000	3232	20210526_HS_PLUG-2.raw	57	A0A0C4DGB6|A0A0C4DGB6_HUMAN;P02768|ALBU_HUMAN;H7C013|H7C013_HUMAN			FALSE
KYTYNYEAESSSGVPGTADSR	38.8	2281.01	21	3.1	761.351	3	15.8195	136000	1570000	3234	20210526_HS_PLUG-2.raw	2	A8MUN2|A8MUN2_HUMAN;A0A669KB70|A0A669KB70_HUMAN;P04114|APOB_HUMAN			FALSE
KYVLPNFEVK	29.65	1235.69	10	0.6	618.856	2	20.7558	19800	357000	4812	20210526_HS_PLUG-3.raw	2				FALSE
LAAAVSNFGYDLYR	59.84	1558.78	14	3.5	780.402	2	22.6889	160000	2440000	5614	20210526_HS_PLUG-2.raw	3	I3L4Z0|I3L4Z0_HUMAN;P36955|PEDF_HUMAN			FALSE
LAKTYETTLEK	37.8	1295.7	11	-4.4	432.904	3	7.474	484000	2730000	1400	20210602_HS_50ng_PLUG-11.raw	7	A0A0C4DGB6|A0A0C4DGB6_HUMAN;P02768|ALBU_HUMAN;C9JKR2|C9JKR2_HUMAN;D6RHD5|D6RHD5_HUMAN;B7WNR0|B7WNR0_HUMAN;H0YA55|H0YA55_HUMAN			FALSE
LALWGEHTGQLYSK	32.07	1601.82	14	0.7	534.95	3	20.8248	80500	1200000	4847	20210526_HS_PLUG-3.raw	2	P04114|APOB_HUMAN			FALSE
LATALSLSNK	53.26	1016.59	10	2.2	509.302	2	15.3755	860000	6230000	2846	20210602_HS_50ng_PLUG-8.raw	13	P04114|APOB_HUMAN			FALSE
LC(+57.02)M(+15.99)GSGLN(+0.98)LC(+57.02)EPNNK	47.45	1722.74	15	5.2	862.384	2	16.1936	113000	669000	3410	20210526_HS_PLUG-1.raw	1	H7C5E8|H7C5E8_HUMAN;P02787|TRFE_HUMAN	Carbamidomethylation; Oxidation (M); Deamidation (NQ); Carbamidomethylation	C2:Carbamidomethylation:1000.00;M3:Oxidation (M):1000.00;N8:Deamidation (NQ):39.44;C10:Carbamidomethylation:1000.00	FALSE
LC(+57.02)M(+15.99)GSGLNLC(+57.02)EPNNK	65.36	1721.75	15	0.4	861.884	2	16.2779	6240000	34800000	3062	20210602_HS_50ng_PLUG-13.raw	16	H7C5E8|H7C5E8_HUMAN;P02787|TRFE_HUMAN	Carbamidomethylation; Oxidation (M); Carbamidomethylation	C2:Carbamidomethylation:1000.00;C10:Carbamidomethylation:1000.00	FALSE
LC(+57.02)TVATLR	56.08	932.511	8	-1.7	467.262	2	14.8778	443000000	2220000000	2970	20210602_HS_50ng_PLUG-12.raw	285	A0A0C4DGB6|A0A0C4DGB6_HUMAN;A0A087WWT3|A0A087WWT3_HUMAN;P02768|ALBU_HUMAN;H7C013|H7C013_HUMAN	Carbamidomethylation	C2:Carbamidomethylation:1000.00	FALSE
LDAQASFLPK	54.89	1088.59	10	1.7	545.302	2	18.3868	4830000	31900000	3644	20210602_HS_50ng_PLUG-5.raw	13	P19827|ITIH1_HUMAN			FALSE
LDELRDEGK	49.85	1073.54	9	-2.5	537.774	2	4.8787	86000000	256000000	840	20210602_HS_50ng_PLUG-5.raw	120	A0A0C4DGB6|A0A0C4DGB6_HUMAN;P02768|ALBU_HUMAN;D6RHD5|D6RHD5_HUMAN;B7WNR0|B7WNR0_HUMAN;H0YA55|H0YA55_HUMAN			FALSE
LDVTTSIGR	53.18	960.524	9	0.4	481.269	2	14.1264	461000	3070000	2596	20210602_HS_50ng_PLUG-8.raw	12	P04114|APOB_HUMAN			FALSE
LEDM(+15.99)EQALSPSVFK	72.47	1608.77	14	2.7	805.398	2	19.7278	4570000	46400000	4535	20210526_HS_PLUG-2.raw	15	P05155|IC1_HUMAN;E9PGN7|E9PGN7_HUMAN	Oxidation (M)		FALSE
LEIQSQVDSQHVGHSVLTAK	49.85	2175.13	20	3	544.793	4	18.1504	526000	7280000	3970	20210526_HS_PLUG-2.raw	5	P04114|APOB_HUMAN			FALSE
LELHVDGPPPRPQLR	50.05	1722.95	15	-3.8	431.745	4	19.4002	220000	2080000	4380	20210526_HS_PLUG-1.raw	3	P04217|A1BG_HUMAN			FALSE
LELLSLSK	30.29	901.548	8	3	451.784	2	20.4852	62400	899000	4726	20210526_HS_PLUG-3.raw	2	P22792|CPN2_HUMAN			FALSE
LELSVDGAK	37.03	930.502	9	-0.7	466.258	2	14.2299	1130000	5580000	2582	20210602_HS_50ng_PLUG-14.raw	12				FALSE
LENEIQTYR	33.98	1164.58	9	0.2	583.298	2	7.2504	103000	438000	1436	20210526_HS_PLUG-3.raw	1	#CONTAM#cont|000133|;#CONTAM#cont|000131|;P13645|K1C10_HUMAN;#CONTAM#cont|000129|;#CONTAM#cont|000136|;#CONTAM#cont|000122|;#CONTAM#cont|000130|			FALSE
LESEETM(+15.99)VLEAHDAQGDVPVTVTVHDFPGK	50.36	3265.54	30	2.6	817.399	4	22.6187	2400000	19200000	5571	20210526_HS_PLUG-2.raw	3	P01024|CO3_HUMAN	Oxidation (M)		FALSE
LFLEPTR	40.24	874.491	7	-1.7	438.252	2	16.385	656000	2590000	3108	20210602_HS_50ng_PLUG-11.raw	8	P00747|PLMN_HUMAN			FALSE
LGEHNIDVLEGNEQFIN(+0.98)AAK	59.7	2211.08	20	3.3	738.04	3	21.7305	282000	3790000	5285	20210526_HS_PLUG-2.raw	3	#CONTAM#cont|000144|;#CONTAM#cont|000142|;#CONTAM#cont|000023|;#CONTAM#cont|000143|;#CONTAM#cont|000141|;#CONTAM#cont|000040|;#CONTAM#cont|000032|	Deamidation (NQ)	N17:Deamidation (NQ):25.58	FALSE
LGEHNIDVLEGNEQFINAAK	79.88	2210.1	20	3.3	737.709	3	22.1751	3600000	40800000	4717	20210602_HS_50ng_PLUG-12.raw	22	#CONTAM#cont|000144|;#CONTAM#cont|000142|;#CONTAM#cont|000023|;#CONTAM#cont|000143|;#CONTAM#cont|000141|;#CONTAM#cont|000040|;#CONTAM#cont|000032|			FALSE
LGEVNTYAGDLQK	54.19	1406.7	13	0.4	704.362	2	16.2504	164000	1980000	3351	20210526_HS_PLUG-1.raw	4				FALSE
LGFTDLFSK	38.15	1026.54	9	3.6	514.28	2	23.8615	291000	2870000	6019	20210526_HS_PLUG-2.raw	5	P29622|KAIN_HUMAN			FALSE
LGM(+15.99)FNIQHC(+57.02)K	28.74	1262.59	10	-0.6	421.872	3	13.5602	335000	541000	2696	20210526_HS_PLUG-2.raw	1		Oxidation (M); Carbamidomethylation	C9:Carbamidomethylation:1000.00	FALSE
LGVYELLLK	45.89	1046.64	9	3.1	524.33	2	24.7943	2690000	21400000	6261	20210526_HS_PLUG-1.raw	15	Q14624|ITIH4_HUMAN;B7ZKJ8|B7ZKJ8_HUMAN;H7C0L5|H7C0L5_HUMAN			FALSE
LGYVTADGETSGSITC(+57.02)GK	43	1814.84	18	2.2	908.431	2	16.2869	472000	4330000	3357	20210526_HS_PLUG-1.raw	5	P08603|CFAH_HUMAN	Carbamidomethylation	C16:Carbamidomethylation:1000.00	FALSE
LHTEAQIQEEGTVVELTGR	72.89	2109.07	19	-1.1	704.033	3	19.7902	464000	6820000	4570	20210526_HS_PLUG-2.raw	3	P01023|A2MG_HUMAN			FALSE
LIC(+57.02)QATGFSPR	63.65	1248.63	11	-0.4	625.321	2	16.1055	7230000	44900000	3044	20210602_HS_50ng_PLUG-5.raw	16	P01871|IGHM_HUMAN	Carbamidomethylation	C3:Carbamidomethylation:1000.00	FALSE
LIDVISM(+15.99)YR	25.52	1124.59	9	7.4	563.306	2	19.8996	388000	972000	4043	20210602_HS_50ng_PLUG-15.raw	1	P04114|APOB_HUMAN	Oxidation (M)		FALSE
LISVDTEHSNIYLQN(+0.98)GPDR	51.96	2171.05	19	-1.6	724.689	3	19.7693	816000	8990000	4027	20210602_HS_50ng_PLUG-6.raw	5	E9PFZ2|E9PFZ2_HUMAN;P00450|CERU_HUMAN	Deamidation (NQ)	N15:Deamidation (NQ):17.01	FALSE
LISVDTEHSNIYLQNGPDR	50.8	2170.07	19	0.9	724.366	3	19.7588	139000	2970000	4511	20210526_HS_PLUG-1.raw	3	E9PFZ2|E9PFZ2_HUMAN;P00450|CERU_HUMAN			FALSE
LIYAASSLQSGVPSR	54.95	1547.83	15	5.3	774.93	2	18.944	70400	1050000	4217	20210526_HS_PLUG-1.raw	2				FALSE
LKEC(+57.02)C(+57.02)EKPLLEK	25.81	1545.79	12	-3	773.903	2	6.5586	373000	1930000	1247	20210526_HS_PLUG-3.raw	2	A0A0C4DGB6|A0A0C4DGB6_HUMAN;P02768|ALBU_HUMAN;C9JKR2|C9JKR2_HUMAN;D6RHD5|D6RHD5_HUMAN;B7WNR0|B7WNR0_HUMAN;H0YA55|H0YA55_HUMAN	Carbamidomethylation; Carbamidomethylation	C4:Carbamidomethylation:1000.00;C5:Carbamidomethylation:1000.00	FALSE
LLATLC(+57.02)SAEVC(+57.02)QC(+57.02)AEGK	62.72	1908.87	17	1.5	955.449	2	19.2298	334000	4960000	4268	20210526_HS_PLUG-3.raw	4		Carbamidomethylation; Carbamidomethylation; Carbamidomethylation	C6:Carbamidomethylation:1000.00;C11:Carbamidomethylation:1000.00;C13:Carbamidomethylation:1000.00	FALSE
LLDNWDSVTSTFSK	71.15	1611.78	14	3.7	806.899	2	23.3233	8540000	72700000	5007	20210602_HS_50ng_PLUG-12.raw	18	F8W696|F8W696_HUMAN;P02647|APOA1_HUMAN			FALSE
LLDSLPSDTR	46.03	1115.58	10	1.2	558.799	2	15.6679	8960000	49400000	2913	20210602_HS_50ng_PLUG-11.raw	24	H9KV48|H9KV48_HUMAN;P05155|IC1_HUMAN;E9PGN7|E9PGN7_HUMAN			FALSE
LLELTGPK	36.28	869.522	8	-1.7	435.768	2	16.3257	2250000	13900000	3125	20210602_HS_50ng_PLUG-4.raw	19	P04217|A1BG_HUMAN;M0R009|M0R009_HUMAN			FALSE
LLIYAVLPTGDVIGDSAK	51.22	1844.03	18	0.5	923.026	2	27.3343	144000	1630000	7018	20210526_HS_PLUG-1.raw	1	P01023|A2MG_HUMAN			FALSE
LLIYDASNLETGVPSR	62.24	1746.92	16	1.1	874.469	2	22.2791	413000	4910000	5469	20210526_HS_PLUG-2.raw	3	A0A2Q2TTZ9|A0A2Q2TTZ9_HUMAN			FALSE
LLIYDASNR	42.87	1063.57	9	1.7	532.791	2	15.7551	6090000	19100000	2976	20210602_HS_50ng_PLUG-7.raw	15				FALSE
LLIYDASSR	31.97	1036.56	9	1.7	519.288	2	15.8496	281000	1170000	3236	20210526_HS_PLUG-2.raw	3				FALSE
LLIYGASTR	41.74	992.565	9	-2.9	497.289	2	16.0721	7870000	22300000	3039	20210602_HS_50ng_PLUG-5.raw	17				FALSE
LLIYWASTR	27.08	1121.62	9	4.5	561.824	2	22.8219	180000	2130000	5683	20210526_HS_PLUG-2.raw	3				FALSE
LLLQM(+15.99)DSSATAYGSTVSK	47.79	1886.93	18	3.4	944.479	2	18.3158	103000	1530000	3993	20210526_HS_PLUG-1.raw	3	P04114|APOB_HUMAN	Oxidation (M)		FALSE
LLLQQVSLPE(+21.98)LPGEYSM(+15.99)K	29.02	2082.07	18	2.4	695.034	3	26.5799	347000	4190000	6828	20210526_HS_PLUG-2.raw	2	P01023|A2MG_HUMAN	Sodium adduct; Oxidation (M)	E10:Sodium adduct:38.03;M17:Oxidation (M):1000.00	FALSE
LLLQQVSLPELPGEYSM(+15.99)K	42.69	2060.09	18	0.7	1031.06	2	26.6039	1660000	14500000	6818	20210526_HS_PLUG-1.raw	2	P01023|A2MG_HUMAN	Oxidation (M)		FALSE
LLQDEFPGIPSPLDAAVEC(+57.02)HR	65.52	2363.16	21	-0.1	788.73	3	26.3738	2910000	26300000	6762	20210526_HS_PLUG-2.raw	3	P02790|HEMO_HUMAN;Q9BS19|Q9BS19_HUMAN	Carbamidomethylation	C19:Carbamidomethylation:1000.00	FALSE
LLSGGNTLHLVSTTK	55.92	1539.86	15	0.3	514.297	3	18.9177	2060000	23000000	4235	20210526_HS_PLUG-2.raw	15	P04114|APOB_HUMAN			FALSE
LM(+15.99)NIFLK	42.25	893.505	7	-1.5	447.759	2	19.1837	8070000	40900000	3859	20210602_HS_50ng_PLUG-5.raw	15	P01024|CO3_HUMAN	Oxidation (M)		FALSE
LM(+15.99)QC(+57.02)LPNPEDVK	48.46	1458.68	12	3.8	730.355	2	17.2743	66800	1140000	3673	20210526_HS_PLUG-2.raw	2	P04003|C4BPA_HUMAN	Oxidation (M); Carbamidomethylation	C4:Carbamidomethylation:1000.00	FALSE
LN(+0.98)GEIQALELPQK	70.8	1452.78	13	2	727.403	2	20.7911	656000	8000000	4875	20210526_HS_PLUG-1.raw	12	P04114|APOB_HUMAN	Deamidation (NQ)	N2:Deamidation (NQ):65.72	FALSE
LNDLEDALQQAK	61.93	1356.69	12	2.9	679.354	2	18.9214	2410000	25800000	3722	20210602_HS_50ng_PLUG-14.raw	13	#CONTAM#cont|000132|;#CONTAM#cont|000135|;#CONTAM#cont|000134|;P04264|K2C1_HUMAN			FALSE
LNGEIQALELPQK	39.95	1451.8	13	7	726.914	2	20.5296	17900	324000	4847	20210526_HS_PLUG-2.raw	1	P04114|APOB_HUMAN			FALSE
LNM(+15.99)GITDLQGLR	64.27	1345.7	12	0.1	673.859	2	19.4424	5280000	74500000	3917	20210602_HS_50ng_PLUG-8.raw	15		Oxidation (M)		FALSE
LPDATPTELAK	54.32	1154.62	11	1.3	578.317	2	15.6538	3160000	16000000	2950	20210602_HS_50ng_PLUG-5.raw	15	P02774|VTDB_HUMAN;D6RF35|D6RF35_HUMAN			FALSE
LPGIVAEGR	46.07	910.524	9	0.1	456.269	2	13.956	367000	1620000	2568	20210602_HS_50ng_PLUG-8.raw	5	P01008|ANT3_HUMAN			FALSE
LPLEYSYGEYR	40.47	1388.66	11	-5.9	695.336	2	19.5278	64300	1470000	4386	20210526_HS_PLUG-3.raw	3				FALSE
LPPNVVEESAR	56.19	1209.64	11	0.4	605.825	2	13.2558	49500000	171000000	2483	20210602_HS_50ng_PLUG-8.raw	89	P01023|A2MG_HUMAN			FALSE
LPYSVVR	45.37	832.481	7	-0.7	417.247	2	13.7779	4560000	9120000	2517	20210602_HS_50ng_PLUG-8.raw	14	P01024|CO3_HUMAN			FALSE
LPYTIITTPPLK	47.52	1355.81	12	-1.7	678.912	2	23.7148	454000	6030000	5961	20210526_HS_PLUG-2.raw	2	P04114|APOB_HUMAN			FALSE
LQAILGVPWK	44.51	1123.68	10	5.3	562.85	2	24.3711	125000	1480000	6182	20210526_HS_PLUG-2.raw	3	P01019|ANGT_HUMAN			FALSE
LQDFSDQLSDYYEK	57.66	1749.77	14	4.1	875.901	2	20.656	947000	11100000	4832	20210526_HS_PLUG-1.raw	11	P04114|APOB_HUMAN			FALSE
LQHLEN(+0.98)ELTHDIITK	46.09	1803.94	15	-0.8	451.993	4	19.121	156000	2070000	4235	20210526_HS_PLUG-3.raw	2		Deamidation (NQ)	N6:Deamidation (NQ):25.70	FALSE
LQHLENELTHDIITK	74.94	1802.95	15	1.4	601.995	3	19.6962	10600000	144000000	4543	20210526_HS_PLUG-2.raw	10				FALSE
LQPLDFK	42.25	859.48	7	-2.7	430.746	2	17.6514	1860000	8860000	3460	20210602_HS_50ng_PLUG-5.raw	12	P01008|ANT3_HUMAN			FALSE
LRTEGDGVYTLNDK	31.24	1579.78	14	1.6	527.605	3	14.1406	74500	252000	2819	20210526_HS_PLUG-2.raw	1	P00738|HPT_HUMAN;J3QLC9|J3QLC9_HUMAN;H0Y300|H0Y300_HUMAN;A0A0C4DGL8|A0A0C4DGL8_HUMAN;J3KRH2|J3KRH2_HUMAN;J3QR68|J3QR68_HUMAN			FALSE
LRTEGDGVYTLNNEK	35.49	1707.84	15	2.8	570.29	3	13.6695	193000	1090000	2527	20210602_HS_50ng_PLUG-9.raw	3	P00738|HPT_HUMAN;H3BMJ7|H3BMJ7_HUMAN;J3QLC9|J3QLC9_HUMAN;H3BS21|H3BS21_HUMAN;J3KSV1|J3KSV1_HUMAN;J3QQI8|J3QQI8_HUMAN;J3KRH2|J3KRH2_HUMAN			FALSE
LSINTHPSQKPLSITVR	69.41	1890.07	17	0.6	473.527	4	19.3728	2810000	28800000	4405	20210526_HS_PLUG-2.raw	6	P01024|CO3_HUMAN			FALSE
LSITGTYDLK	46.07	1109.6	10	-1.5	555.807	2	18.9534	44100000	373000000	4249	20210526_HS_PLUG-2.raw	54				FALSE
LSLEIEQLELQR	57.81	1469.81	12	2.6	735.917	2	23.9806	448000	6720000	6053	20210526_HS_PLUG-2.raw	3	P04003|C4BPA_HUMAN			FALSE
LSNNALSGLPQGVFGK	49	1600.86	16	5.9	801.444	2	22.9403	64200	1210000	5613	20210526_HS_PLUG-3.raw	2	P22792|CPN2_HUMAN			FALSE
LSNVLQQVK	53.02	1027.6	9	0.8	514.809	2	15.2873	1370000	5760000	2879	20210602_HS_50ng_PLUG-12.raw	13	P04114|APOB_HUMAN			FALSE
LSPIYNLVPVK	50.84	1241.74	11	1	621.877	2	23.5253	1420000	16800000	5163	20210602_HS_50ng_PLUG-5.raw	15	P02748|CO9_HUMAN			FALSE
LSSPATLNSR	47.75	1044.56	10	-2	523.284	2	7.0018	5610000	22600000	1281	20210602_HS_50ng_PLUG-11.raw	21	#CONTAM#cont|000142|;#CONTAM#cont|000023|;#CONTAM#cont|000143|;#CONTAM#cont|000141|;#CONTAM#cont|000040|;#CONTAM#cont|000032|			FALSE
LSSPAVITDK	43.16	1029.57	10	1.5	515.793	2	12.7262	1320000	3080000	2344	20210602_HS_50ng_PLUG-13.raw	9	P00747|PLMN_HUMAN			FALSE
LSSVTAADTAVYYC(+57.02)AR	59.16	1746.82	16	1.2	874.424	2	18.7124	689000	8010000	4131	20210526_HS_PLUG-1.raw	8		Carbamidomethylation	C14:Carbamidomethylation:1000.00	FALSE
LSYTC(+57.02)EGGFR	43.53	1188.52	10	-2.3	595.27	2	14.6926	95200	453000	2939	20210526_HS_PLUG-2.raw	1	P08603|CFAH_HUMAN	Carbamidomethylation	C5:Carbamidomethylation:1000.00	FALSE
LTISEQNIQR	49.24	1200.65	10	1.6	601.331	2	14.6253	2040000	9230000	2660	20210602_HS_50ng_PLUG-14.raw	15	A8MUN2|A8MUN2_HUMAN;P04114|APOB_HUMAN			FALSE
LTLDIQNK	42.01	943.534	8	-1.7	472.773	2	15.3993	1100000	5000000	2896	20210602_HS_50ng_PLUG-5.raw	14	P04114|APOB_HUMAN			FALSE
LTPLYELVK	36.64	1074.63	9	4	538.328	2	22.769	71400	890000	5653	20210526_HS_PLUG-2.raw	2				FALSE
LVAASQAALGL	54.7	1012.59	11	3.1	507.305	2	24.9283	217000000	3520000000	5241	20210602_HS_50ng_PLUG-15.raw	231	A0A087WWT3|A0A087WWT3_HUMAN;P02768|ALBU_HUMAN;C9JKR2|C9JKR2_HUMAN;D6RHD5|D6RHD5_HUMAN;B7WNR0|B7WNR0_HUMAN;H0YA55|H0YA55_HUMAN			FALSE
LVAASQAALGL(+21.98)	40.83	1034.57	11	-3.3	518.294	2	20.2166	107000000	900000000	4705	20210526_HS_PLUG-2.raw	27	A0A087WWT3|A0A087WWT3_HUMAN;P02768|ALBU_HUMAN;C9JKR2|C9JKR2_HUMAN;D6RHD5|D6RHD5_HUMAN;B7WNR0|B7WNR0_HUMAN;H0YA55|H0YA55_HUMAN	Sodium adduct		FALSE
LVAYYTLIGASGQR	56.59	1510.81	14	0.2	756.418	2	22.3141	586000	10600000	5446	20210526_HS_PLUG-1.raw	1	P01024|CO3_HUMAN			FALSE
LVDKFLEDVK	35.38	1204.67	10	4.4	603.347	2	19.1351	249000	3490000	4276	20210526_HS_PLUG-1.raw	3				FALSE
LVGFIDDAVK	51.87	1075.59	10	1.4	538.804	2	20.173	868000	12200000	4159	20210602_HS_50ng_PLUG-8.raw	15	P04114|APOB_HUMAN			FALSE
LVHVEEPHTETVR	53.11	1544.79	13	-3.5	515.939	3	7.5525	1410000	4540000	1505	20210526_HS_PLUG-3.raw	2	P01023|A2MG_HUMAN			FALSE
LVN(+0.98)EVTEFAK	58.69	1149.59	10	-1.3	575.802	2	16.7341	73000000	461000000	3197	20210602_HS_50ng_PLUG-10.raw	26	A0A0C4DGB6|A0A0C4DGB6_HUMAN;A0A087WWT3|A0A087WWT3_HUMAN;P02768|ALBU_HUMAN;H7C013|H7C013_HUMAN	Deamidation (NQ)		FALSE
LVNELTEFAK	38.03	1162.62	10	0.3	582.319	2	17.2661	3130000	33600000	3342	20210602_HS_50ng_PLUG-5.raw	27	#CONTAM#cont|000097|;#CONTAM#cont|000035|;#CONTAM#cont|000017|			FALSE
LVNEVTE(+21.98)FAK	57.69	1170.59	10	-3.1	586.3	2	17.3199	27000000	154000000	3353	20210602_HS_50ng_PLUG-5.raw	16	A0A0C4DGB6|A0A0C4DGB6_HUMAN;A0A087WWT3|A0A087WWT3_HUMAN;P02768|ALBU_HUMAN;H7C013|H7C013_HUMAN	Sodium adduct	E7:Sodium adduct:37.54	FALSE
LVNEVTEFAK	66.04	1148.61	10	-9.1	575.306	2	17.3648	853000000	8170000000	3399	20210602_HS_50ng_PLUG-10.raw	484	A0A0C4DGB6|A0A0C4DGB6_HUMAN;A0A087WWT3|A0A087WWT3_HUMAN;P02768|ALBU_HUMAN;H7C013|H7C013_HUMAN			FALSE
LVRPE(+21.98)VD(+21.98)VMC(+57.02)TAFHDNEETFLK	48.27	2693.22	22	8.7	898.759	3	24.7342	11100000	74800000	6269	20210526_HS_PLUG-2.raw	2	A0A0C4DGB6|A0A0C4DGB6_HUMAN;A0A087WWT3|A0A087WWT3_HUMAN;P02768|ALBU_HUMAN;H7C013|H7C013_HUMAN	Sodium adduct; Sodium adduct; Carbamidomethylation	E5:Sodium adduct:44.14;D7:Sodium adduct:49.35;C10:Carbamidomethylation:1000.00	FALSE
LVRPE(+21.98)VD(+21.98)VMC(+57.02)TAFHDNEETFLKK	46.15	2821.32	23	8.2	706.345	4	23.5481	636000	8360000	5905	20210526_HS_PLUG-2.raw	3	A0A0C4DGB6|A0A0C4DGB6_HUMAN;A0A087WWT3|A0A087WWT3_HUMAN;P02768|ALBU_HUMAN;H7C013|H7C013_HUMAN	Sodium adduct; Sodium adduct; Carbamidomethylation	E5:Sodium adduct:40.10;D7:Sodium adduct:46.32;C10:Carbamidomethylation:1000.00	FALSE
LVRPEVDVM(+15.99)C(+57.02)TAFHD(+21.98)NEETFLK	42.03	2687.23	22	-1.1	896.754	3	22.3571	226000	2230000	5460	20210526_HS_PLUG-1.raw	1	A0A0C4DGB6|A0A0C4DGB6_HUMAN;A0A087WWT3|A0A087WWT3_HUMAN;P02768|ALBU_HUMAN;H7C013|H7C013_HUMAN	Oxidation (M); Carbamidomethylation; Sodium adduct	M9:Oxidation (M):1000.00;C10:Carbamidomethylation:1000.00;D15:Sodium adduct:0.00	FALSE
LVRPEVDVM(+15.99)C(+57.02)TAFHDN(+0.98)EETFLK	61.41	2666.24	22	3.8	889.76	3	22.3166	311000	247000	5484	20210526_HS_PLUG-2.raw	2	A0A0C4DGB6|A0A0C4DGB6_HUMAN;A0A087WWT3|A0A087WWT3_HUMAN;P02768|ALBU_HUMAN;H7C013|H7C013_HUMAN	Oxidation (M); Carbamidomethylation; Deamidation (NQ)	C10:Carbamidomethylation:1000.00	FALSE
LVRPEVDVM(+15.99)C(+57.02)TAFHDNE(+21.98)ETFLK	35.96	2687.23	22	1.5	896.756	3	22.4476	331000	5910000	5419	20210526_HS_PLUG-3.raw	2	A0A0C4DGB6|A0A0C4DGB6_HUMAN;A0A087WWT3|A0A087WWT3_HUMAN;P02768|ALBU_HUMAN;H7C013|H7C013_HUMAN	Oxidation (M); Carbamidomethylation; Sodium adduct	M9:Oxidation (M):1000.00;C10:Carbamidomethylation:1000.00;E17:Sodium adduct:0.00	FALSE
LVRPEVDVM(+15.99)C(+57.02)TAFHDNEETFLK	89.73	2665.25	22	-4.2	667.32	4	24.0427	47400000	847000000	6081	20210526_HS_PLUG-2.raw	87	A0A0C4DGB6|A0A0C4DGB6_HUMAN;A0A087WWT3|A0A087WWT3_HUMAN;P02768|ALBU_HUMAN;H7C013|H7C013_HUMAN	Oxidation (M); Carbamidomethylation	C10:Carbamidomethylation:1000.00	FALSE
LVRPEVDVM(+15.99)C(+57.02)TAFHDNEETFLKK	88.86	2793.35	23	-4.7	699.343	4	21.364	7190000	76800000	5086	20210526_HS_PLUG-1.raw	6	A0A0C4DGB6|A0A0C4DGB6_HUMAN;A0A087WWT3|A0A087WWT3_HUMAN;P02768|ALBU_HUMAN;H7C013|H7C013_HUMAN	Oxidation (M); Carbamidomethylation	C10:Carbamidomethylation:1000.00	FALSE
LVRPEVDVMC(+57.02)TAFHDNEETFLK	67.97	2649.26	22	2.9	663.326	4	24.7396	1020000	11000000	6188	20210526_HS_PLUG-3.raw	8	A0A0C4DGB6|A0A0C4DGB6_HUMAN;A0A087WWT3|A0A087WWT3_HUMAN;P02768|ALBU_HUMAN;H7C013|H7C013_HUMAN	Carbamidomethylation	C10:Carbamidomethylation:1000.00	FALSE
LYGSEAFATDFQDSAAAK	72.37	1890.86	18	3.2	946.442	2	20.8583	5400000	47000000	4313	20210602_HS_50ng_PLUG-9.raw	15	G3V595|G3V595_HUMAN;P01011|AACT_HUMAN			FALSE
LYHSEAFTVNFGDTEEAK	66.79	2056.94	18	-3	686.654	3	20.9946	869000	9880000	4996	20210526_HS_PLUG-2.raw	4				FALSE
LYHSEAFTVNFGDTEEAKK	77.68	2185.03	19	2.5	729.356	3	20.1782	1170000	13300000	4711	20210526_HS_PLUG-2.raw	3				FALSE
M(+15.99)C(+57.02)PQLQQYEM(+15.99)HGPEGLR	64.89	2104.91	17	1.7	702.649	3	17.6844	1000000	10000000	3823	20210526_HS_PLUG-2.raw	4	P01023|A2MG_HUMAN	Oxidation (M); Carbamidomethylation; Oxidation (M)	C2:Carbamidomethylation:1000.00	FALSE
M(+15.99)EEVEAM(+15.99)LLPETLK	69.92	1663.8	14	2.2	832.912	2	21.6152	2900000	38700000	4593	20210602_HS_50ng_PLUG-10.raw	13	G3V595|G3V595_HUMAN;G3V3A0|G3V3A0_HUMAN;A0A087WY93|A0A087WY93_HUMAN;P01011|AACT_HUMAN	Oxidation (M); Oxidation (M)		FALSE
M(+15.99)EEVEAM(+15.99)LLPETLKR	51.81	1819.91	15	4.5	607.648	3	20.5603	319000	3910000	4853	20210526_HS_PLUG-2.raw	3	G3V595|G3V595_HUMAN;G3V3A0|G3V3A0_HUMAN;A0A087WY93|A0A087WY93_HUMAN;P01011|AACT_HUMAN	Oxidation (M); Oxidation (M)		FALSE
M(+15.99)FTTAPDQVDKEDEDFQESNK	67.85	2489.05	21	3.8	830.695	3	16.9393	4450000	38400000	3255	20210602_HS_50ng_PLUG-12.raw	13	E9PFZ2|E9PFZ2_HUMAN;H7C5R1|H7C5R1_HUMAN;P00450|CERU_HUMAN	Oxidation (M)		FALSE
M(+15.99)NTVIAALSR	61.81	1090.58	10	2.4	546.299	2	17.0466	840000	6110000	3282	20210602_HS_50ng_PLUG-12.raw	15	P08185|CBG_HUMAN	Oxidation (M)		FALSE
M(+15.99)PGTVATLR	45.13	960.506	9	-3.1	481.259	2	19.2003	27300000	208000000	3847	20210602_HS_50ng_PLUG-8.raw	14		Oxidation (M)		FALSE
M(+15.99)RPSTDTITVM(+15.99)VENSHGLR	47.75	2175.04	19	1.8	544.771	4	17.5881	53600	909000	3766	20210526_HS_PLUG-1.raw	2		Oxidation (M); Oxidation (M)		FALSE
M(+15.99)SAVEGIC(+57.02)TSESPVIDHQGTK	39.49	2261.03	21	4.3	754.69	3	17.2747	14700	413000	3694	20210526_HS_PLUG-2.raw	1	P01031|CO5_HUMAN	Oxidation (M); Carbamidomethylation	C8:Carbamidomethylation:1000.00	FALSE
M(+15.99)TSNFPVDLSDYPK	60.63	1628.74	14	1.6	815.381	2	21.2383	1440000	17700000	5085	20210526_HS_PLUG-2.raw	13	P04114|APOB_HUMAN	Oxidation (M)		FALSE
M(+15.99)VSGFIPLKPTVK	53.74	1431.82	13	1.8	478.282	3	20.5603	5570000	44400000	4835	20210526_HS_PLUG-2.raw	15	P01023|A2MG_HUMAN;P20742|PZP_HUMAN	Oxidation (M)		FALSE
M(+15.99)YLGYEYVTAIR	67.28	1493.72	12	3.8	747.871	2	21.9462	19100000	189000000	4676	20210602_HS_50ng_PLUG-10.raw	52	P02787|TRFE_HUMAN	Oxidation (M)		FALSE
M(+15.99)YQM(+15.99)DIQQELQR	60.52	1613.72	12	1.3	807.867	2	16.4557	263000	1700000	3145	20210602_HS_50ng_PLUG-5.raw	3	P04114|APOB_HUMAN	Oxidation (M); Oxidation (M)		FALSE
M(+15.99)YYSAVDPTK	37.66	1189.53	10	0.9	595.774	2	7.5493	167000	1010000	1450	20210602_HS_50ng_PLUG-12.raw	5	P00450|CERU_HUMAN	Oxidation (M)		FALSE
MPGTVATLR	37	944.511	9	-1	473.262	2	20.4407	3010000	11800000	4302	20210602_HS_50ng_PLUG-5.raw	55				FALSE
MYLGYEYVTAIR	53.54	1477.73	12	4.2	739.877	2	23.5048	78100	1130000	5900	20210526_HS_PLUG-2.raw	2	P02787|TRFE_HUMAN			FALSE
N(+0.98)EDSLVFVQTDK	56.48	1394.66	12	-0.2	698.338	2	18.5806	55800	1200000	4051	20210526_HS_PLUG-3.raw	3	P01023|A2MG_HUMAN;F8W7L3|F8W7L3_HUMAN	Deamidation (NQ)	N1:Deamidation (NQ):81.34	FALSE
N(+0.98)GVAQEPVHLDSPAIK	58.71	1674.86	16	3.1	559.297	3	18.6654	3240000	37100000	4139	20210526_HS_PLUG-2.raw	21	P04217|A1BG_HUMAN;M0R009|M0R009_HUMAN	Deamidation (NQ)	N1:Deamidation (NQ):18.33	FALSE
N(+0.98)PNGYSFSIPVK	44.13	1322.65	12	2.4	662.334	2	20.8516	372000	2540000	4341	20210602_HS_50ng_PLUG-8.raw	3	P04114|APOB_HUMAN	Deamidation (NQ)	N1:Deamidation (NQ):8.22	FALSE
N(+0.98)QVSLTC(+57.02)LVK	41.72	1161.61	10	9.7	581.816	2	22.3382	9620	379000	4775	20210602_HS_50ng_PLUG-12.raw	1	P01859|IGHG2_HUMAN;P01857|IGHG1_HUMAN;A0A286YEY4|A0A286YEY4_HUMAN;A0A0A0MS08|A0A0A0MS08_HUMAN;A0A0A0MS07|A0A0A0MS07_HUMAN	Deamidation (NQ); Carbamidomethylation	N1:Deamidation (NQ):0.00;C7:Carbamidomethylation:1000.00	FALSE
NEC(+57.02)FLQHK	37.75	1074.49	8	-4.2	538.251	2	6.0157	509000	1510000	1047	20210602_HS_50ng_PLUG-9.raw	3	A0A0C4DGB6|A0A0C4DGB6_HUMAN;A0A087WWT3|A0A087WWT3_HUMAN;P02768|ALBU_HUMAN;H7C013|H7C013_HUMAN	Carbamidomethylation	C3:Carbamidomethylation:1000.00	FALSE
NEC(+57.02)FLQHKDDNPNLPR	62.88	1995.92	16	-4.6	666.314	3	16.3159	2340000	16000000	3384	20210526_HS_PLUG-2.raw	6	A0A0C4DGB6|A0A0C4DGB6_HUMAN;A0A087WWT3|A0A087WWT3_HUMAN;P02768|ALBU_HUMAN;H7C013|H7C013_HUMAN	Carbamidomethylation	C3:Carbamidomethylation:1000.00	FALSE
NEDSLVFVQTDK	68.84	1393.67	12	-1.1	697.843	2	18.04	19600000	139000000	3514	20210602_HS_50ng_PLUG-8.raw	21	P01023|A2MG_HUMAN;F8W7L3|F8W7L3_HUMAN			FALSE
NFPPSQDASGDLYTTSSQLTLPATQC(+57.02)LAGK	59.7	3167.51	30	2.8	1056.85	3	24.5445	3290000	4790000	6301	20210526_HS_PLUG-1.raw	2	P01876|IGHA1_HUMAN;A0A286YEY1|A0A286YEY1_HUMAN	Carbamidomethylation	C26:Carbamidomethylation:1000.00	FALSE
NFPSPVDAAFR	62.48	1219.6	11	-1.4	610.806	2	20.8353	26300000	371000000	4315	20210602_HS_50ng_PLUG-8.raw	46	P02790|HEMO_HUMAN;Q9BS19|Q9BS19_HUMAN			FALSE
NIILPVYDK	53.87	1073.61	9	1.6	537.814	2	20.2904	2800000	24000000	4234	20210602_HS_50ng_PLUG-5.raw	15	P04114|APOB_HUMAN			FALSE
NILTSN(+0.98)NIDVK	41.04	1230.65	11	0.4	616.333	2	17.0388	116000	1650000	3529	20210526_HS_PLUG-3.raw	3	P05090|APOD_HUMAN;C9JF17|C9JF17_HUMAN	Deamidation (NQ)	N6:Deamidation (NQ):17.01	FALSE
NILTSNNIDVK	59.93	1229.66	11	-1.2	615.84	2	17.4029			3725	20210526_HS_PLUG-2.raw	15	P05090|APOD_HUMAN;C9JF17|C9JF17_HUMAN			FALSE
NLAVSQVVHK	39.53	1093.62	10	-1.5	547.821	2	7.6639	754000	2400000	1511	20210526_HS_PLUG-3.raw	2	G3V3A0|G3V3A0_HUMAN;P01011|AACT_HUMAN			FALSE
NLNEKDYELLC(+57.02)LDGTR	60.31	1951.93	16	0.1	651.653	3	21.5103	4320000	57300000	5083	20210526_HS_PLUG-3.raw	8	P02787|TRFE_HUMAN	Carbamidomethylation	C11:Carbamidomethylation:1000.00	FALSE
NNALDFVTK	58	1020.52	9	0.5	511.269	2	17.0873	1190000	7860000	3264	20210602_HS_50ng_PLUG-15.raw	13	P04114|APOB_HUMAN			FALSE
NNEGTYYSPNYNPQSR	39.86	1902.81	16	0.7	952.418	2	13.972	153000	564000	2775	20210526_HS_PLUG-2.raw	1	E9PFZ2|E9PFZ2_HUMAN;H7C5R1|H7C5R1_HUMAN;P00450|CERU_HUMAN			FALSE
NPDGDVGGPWC(+57.02)YTTNPR	38.17	1904.81	17	2.2	953.419	2	18.9173	63900	974000	4216	20210526_HS_PLUG-1.raw	3	P00747|PLMN_HUMAN	Carbamidomethylation	C11:Carbamidomethylation:1000.00	FALSE
NPN(+0.98)GYSFSIPVK	59.59	1322.65	12	2.2	662.337	2	20.8396	721000	5250000	4951	20210526_HS_PLUG-2.raw	10	P04114|APOB_HUMAN	Deamidation (NQ)	N3:Deamidation (NQ):32.28	FALSE
NPNLPPETVDSLK	39.05	1422.74	13	0	712.375	2	17.9252	2380000	12300000	3491	20210602_HS_50ng_PLUG-13.raw	16	P05090|APOD_HUMAN;C9JF17|C9JF17_HUMAN			FALSE
NQ(+0.98)VSLTC(+57.02)LVK	52.69	1161.61	10	2.7	581.812	2	19.6607	2410000	33900000	4051	20210602_HS_50ng_PLUG-5.raw	10	P01859|IGHG2_HUMAN;P01857|IGHG1_HUMAN;A0A286YEY4|A0A286YEY4_HUMAN;A0A0A0MS08|A0A0A0MS08_HUMAN;A0A0A0MS07|A0A0A0MS07_HUMAN	Deamidation (NQ); Carbamidomethylation	Q2:Deamidation (NQ):8.69;C7:Carbamidomethylation:1000.00	FALSE
NQVSLTC(+57.02)LVK	63.28	1160.62	10	-5.4	581.315	2	19.2056	139000000	1000000000	3919	20210602_HS_50ng_PLUG-10.raw	116	P01859|IGHG2_HUMAN;P01857|IGHG1_HUMAN;A0A286YEY4|A0A286YEY4_HUMAN;A0A0A0MS08|A0A0A0MS08_HUMAN;A0A0A0MS07|A0A0A0MS07_HUMAN	Carbamidomethylation	C7:Carbamidomethylation:1000.00	FALSE
NSLYLQ(+0.98)M(+15.99)NSLR	44.14	1354.66	11	-2.8	678.333	2	17.5903	326000	3550000	3400	20210602_HS_50ng_PLUG-13.raw	5		Deamidation (NQ); Oxidation (M)	Q6:Deamidation (NQ):13.45;M7:Oxidation (M):1000.00	FALSE
NSLYLQM(+15.99)N(+0.98)SLR	40.92	1354.66	11	-1.6	678.336	2	17.4026	387000	3070000	3697	20210526_HS_PLUG-1.raw	2		Oxidation (M); Deamidation (NQ)	M7:Oxidation (M):1000.00;N8:Deamidation (NQ):11.22	FALSE
NSLYLQM(+15.99)NSLR	51.4	1353.67	11	1.3	677.846	2	17.045	1450000	12200000	3598	20210526_HS_PLUG-2.raw	15		Oxidation (M)		FALSE
NTEILTGSWSDQTYPEGTQAIYK	28.77	2601.22	23	1.1	868.086	3	23.0459	27800	561000	5715	20210526_HS_PLUG-1.raw	1	A0A0D9SG88|A0A0D9SG88_HUMAN;P08603|CFAH_HUMAN;Q5TFM2|Q5TFM2_HUMAN			FALSE
NTLELSN(+0.98)GVIVK	47.72	1286.71	12	2.4	644.365	2	19.6169	1060000	17600000	4414	20210526_HS_PLUG-3.raw	15	P04114|APOB_HUMAN	Deamidation (NQ)	N7:Deamidation (NQ):63.05	FALSE
NTLYLQM(+15.99)NSLR	50.41	1367.69	11	0.5	684.851	2	17.3878	1860000	21700000	3362	20210602_HS_50ng_PLUG-10.raw	13		Oxidation (M)		FALSE
NVPLPVIAELPPK	52.29	1385.83	13	-0.7	693.924	2	24.8094	8410000	17400000	6223	20210526_HS_PLUG-1.raw	15	P01871|IGHM_HUMAN			FALSE
NVVFVIDK	47.19	932.533	8	2.8	467.275	2	18.5984	195000	3720000	3715	20210602_HS_50ng_PLUG-5.raw	11	Q14624|ITIH4_HUMAN;B7ZKJ8|B7ZKJ8_HUMAN;H7C0L5|H7C0L5_HUMAN			FALSE
NWGLSVYADKPETTK	46.94	1707.85	15	6.3	570.295	3	19.5949	343000	5020000	4508	20210526_HS_PLUG-2.raw	3	P02763|A1AG1_HUMAN			FALSE
NYNLVESLK	55.63	1078.57	9	1.3	540.291	2	18.5837	1330000	11800000	3703	20210602_HS_50ng_PLUG-5.raw	15	P05546|HEP2_HUMAN			FALSE
Q(+0.98)N(+0.98)C(+57.02)ELFEQLGEYK	48.24	1658.71	13	9.6	830.372	2	24.1245	602000	2970000	5449	20210602_HS_50ng_PLUG-7.raw	6	A0A0C4DGB6|A0A0C4DGB6_HUMAN;A0A087WWT3|A0A087WWT3_HUMAN;P02768|ALBU_HUMAN;C9JKR2|C9JKR2_HUMAN;D6RHD5|D6RHD5_HUMAN;B7WNR0|B7WNR0_HUMAN;H0YA55|H0YA55_HUMAN	Deamidation (NQ); Deamidation (NQ); Carbamidomethylation	Q1:Deamidation (NQ):50.34;N2:Deamidation (NQ):53.33;C3:Carbamidomethylation:1000.00	FALSE
Q(+0.98)NC(+57.02)ELFE(+21.98)QLGEYK	38.68	1679.71	13	-3.5	840.86	2	23.2488	196000	593000	5015	20210602_HS_50ng_PLUG-8.raw	1	A0A0C4DGB6|A0A0C4DGB6_HUMAN;A0A087WWT3|A0A087WWT3_HUMAN;P02768|ALBU_HUMAN;C9JKR2|C9JKR2_HUMAN;D6RHD5|D6RHD5_HUMAN;B7WNR0|B7WNR0_HUMAN;H0YA55|H0YA55_HUMAN	Deamidation (NQ); Carbamidomethylation; Sodium adduct	Q1:Deamidation (NQ):0.00;C3:Carbamidomethylation:1000.00;E7:Sodium adduct:28.73	FALSE
Q(+0.98)NC(+57.02)ELFEQ(+0.98)LGEYK	44.34	1658.71	13	9.6	830.372	2	24.1245	527000	667000	5392	20210602_HS_50ng_PLUG-7.raw	1	A0A0C4DGB6|A0A0C4DGB6_HUMAN;A0A087WWT3|A0A087WWT3_HUMAN;P02768|ALBU_HUMAN;C9JKR2|C9JKR2_HUMAN;D6RHD5|D6RHD5_HUMAN;B7WNR0|B7WNR0_HUMAN;H0YA55|H0YA55_HUMAN	Deamidation (NQ); Carbamidomethylation; Deamidation (NQ)	Q1:Deamidation (NQ):0.00;C3:Carbamidomethylation:1000.00;Q8:Deamidation (NQ):12.65	FALSE
Q(+0.98)NC(+57.02)ELFEQLGEYK	66.06	1657.73	13	7.3	829.878	2	22.2232	5880000	26800000	4741	20210602_HS_50ng_PLUG-8.raw	21	A0A0C4DGB6|A0A0C4DGB6_HUMAN;A0A087WWT3|A0A087WWT3_HUMAN;P02768|ALBU_HUMAN;C9JKR2|C9JKR2_HUMAN;D6RHD5|D6RHD5_HUMAN;B7WNR0|B7WNR0_HUMAN;H0YA55|H0YA55_HUMAN	Deamidation (NQ); Carbamidomethylation	Q1:Deamidation (NQ):0.00;C3:Carbamidomethylation:1000.00	FALSE
Q(+0.98)TALVELVK	47.86	1000.58	9	3	501.299	2	19.3697	1410000	19400000	3888	20210602_HS_50ng_PLUG-15.raw	11	A0A0C4DGB6|A0A0C4DGB6_HUMAN;A0A087WWT3|A0A087WWT3_HUMAN;P02768|ALBU_HUMAN;C9JKR2|C9JKR2_HUMAN;D6RHD5|D6RHD5_HUMAN;B7WNR0|B7WNR0_HUMAN;H0YA55|H0YA55_HUMAN	Deamidation (NQ)		FALSE
Q(-17.03)AVD(+21.98)TAVDGVFIR	37.63	1394.68	13	-0.6	698.35	2	22.6067	65100	729000	5557	20210526_HS_PLUG-1.raw	1	P19827|ITIH1_HUMAN;F8WAS2|F8WAS2_HUMAN	Pyro-glu from Q; Sodium adduct	Q1:Pyro-glu from Q:1000.00;D4:Sodium adduct:22.05	FALSE
Q(-17.03)AVDTAVDGVFIR	62.9	1372.7	13	3.9	687.362	2	22.6187	2650000	21800000	5586	20210526_HS_PLUG-2.raw	15	P19827|ITIH1_HUMAN;F8WAS2|F8WAS2_HUMAN	Pyro-glu from Q		FALSE
Q(-17.03)DPPSVVVTSHQAPGEK	63.21	1757.86	17	-0.4	879.936	2	16.209	944000	8080000	3046	20210602_HS_50ng_PLUG-13.raw	10	P25311|ZA2G_HUMAN	Pyro-glu from Q		FALSE
Q(-17.03)E(+21.98)PSQGTTTFAVTSILR	56.13	1839.9	17	2.4	920.958	2	24.4955	3340000	30400000	5378	20210602_HS_50ng_PLUG-5.raw	10	P01876|IGHA1_HUMAN;A0A286YEY1|A0A286YEY1_HUMAN	Pyro-glu from Q; Sodium adduct	Q1:Pyro-glu from Q:1000.00;E2:Sodium adduct:65.61	FALSE
Q(-17.03)ELSEAEQATR	36.09	1243.57	11	-0.8	622.793	2	7.5182	47100	331000	1506	20210526_HS_PLUG-3.raw	1	P01024|CO3_HUMAN	Pyro-glu from Q		FALSE
Q(-17.03)EPERN(+0.98)EC(+57.02)FLQHK	56	1697.75	13	5.8	566.928	3	13.7086	15100000	43100000	2676	20210526_HS_PLUG-3.raw	19	A0A0C4DGB6|A0A0C4DGB6_HUMAN;A0A087WWT3|A0A087WWT3_HUMAN;P02768|ALBU_HUMAN;H7C013|H7C013_HUMAN	Pyro-glu from Q; Deamidation (NQ); Carbamidomethylation	Q1:Pyro-glu from Q:1000.00;N6:Deamidation (NQ):79.02;C8:Carbamidomethylation:1000.00	FALSE
Q(-17.03)EPERNEC(+57.02)FLQHK	67.17	1696.76	13	-6	566.594	3	13.2664	158000000	727000000	2644	20210526_HS_PLUG-2.raw	140	A0A0C4DGB6|A0A0C4DGB6_HUMAN;A0A087WWT3|A0A087WWT3_HUMAN;P02768|ALBU_HUMAN;H7C013|H7C013_HUMAN	Pyro-glu from Q; Carbamidomethylation	C8:Carbamidomethylation:1000.00	FALSE
Q(-17.03)EPERNEC(+57.02)FLQHKDDNPNLPR	102.78	2618.19	21	-0.5	655.558	4	17.5595	3370000	47800000	3706	20210526_HS_PLUG-3.raw	12	A0A0C4DGB6|A0A0C4DGB6_HUMAN;A0A087WWT3|A0A087WWT3_HUMAN;P02768|ALBU_HUMAN;H7C013|H7C013_HUMAN	Pyro-glu from Q; Carbamidomethylation	C8:Carbamidomethylation:1000.00	FALSE
Q(-17.03)EPSQGTTTFAVTSILR	79.49	1817.92	17	1.7	909.967	2	24.593	25700000	311000000	5306	20210602_HS_50ng_PLUG-8.raw	22	P01876|IGHA1_HUMAN;A0A286YEY1|A0A286YEY1_HUMAN	Pyro-glu from Q		FALSE
Q(-17.03)EPSQGTTTYAVTSILR	42.59	1833.91	17	-3.2	917.963	2	24.6556	434000	1160000	6168	20210526_HS_PLUG-3.raw	2		Pyro-glu from Q		FALSE
Q(-17.03)FPILLDFK	55.66	1102.61	9	4.4	552.315	2	30.2688	213000	1410000	7598	20210526_HS_PLUG-2.raw	3	P05546|HEP2_HUMAN	Pyro-glu from Q		FALSE
Q(-17.03)FSFPLSSE(+21.98)PFQGSYK	56.9	1852.83	16	1.9	927.427	2	27.0441	474000	4380000	6850	20210526_HS_PLUG-3.raw	3	P01023|A2MG_HUMAN	Pyro-glu from Q; Sodium adduct	Q1:Pyro-glu from Q:1000.00;E9:Sodium adduct:33.89	FALSE
Q(-17.03)FSFPLSSEPFQGSYK	55.57	1830.85	16	1.1	916.435	2	27.033	6740000	46500000	6841	20210526_HS_PLUG-3.raw	13	P01023|A2MG_HUMAN	Pyro-glu from Q		FALSE
Q(-17.03)GHN(+0.98)SVFLIK	53.52	1125.58	10	3	563.8	2	19.4076	5330000	47700000	3849	20210602_HS_50ng_PLUG-14.raw	16	P02790|HEMO_HUMAN;Q9BS19|Q9BS19_HUMAN	Pyro-glu from Q; Deamidation (NQ)		FALSE
Q(-17.03)GHNSVFLIK	59.28	1124.6	10	3.8	563.308	2	19.0405	21300000	134000000	3780	20210602_HS_50ng_PLUG-15.raw	24	P02790|HEMO_HUMAN;Q9BS19|Q9BS19_HUMAN	Pyro-glu from Q		FALSE
Q(-17.03)GIPFFGQVR	62	1130.59	10	6.5	566.305	2	25.2295	9770000	53700000	5393	20210602_HS_50ng_PLUG-12.raw	15	P01023|A2MG_HUMAN	Pyro-glu from Q		FALSE
Q(-17.03)GLLPVLE(+21.98)SFK	35.43	1234.66	11	0.3	618.338	2	29.0274	546000	4820000	7375	20210526_HS_PLUG-1.raw	2	F8W696|F8W696_HUMAN;P02647|APOA1_HUMAN	Pyro-glu from Q; Sodium adduct	Q1:Pyro-glu from Q:1000.00;E8:Sodium adduct:38.16	FALSE
Q(-17.03)GLLPVLESFK	55.08	1212.68	11	3.7	607.347	2	28.9035	4770000	37400000	6170	20210602_HS_50ng_PLUG-5.raw	15	F8W696|F8W696_HUMAN;P02647|APOA1_HUMAN	Pyro-glu from Q		FALSE
Q(-17.03)GPVNLLSDPEQGVEVTGQYER	57.69	2397.14	22	1.3	800.06	3	24.1793	534000	6940000	6116	20210526_HS_PLUG-2.raw	6	Q14624|ITIH4_HUMAN;B7ZKJ8|B7ZKJ8_HUMAN	Pyro-glu from Q		FALSE
Q(-17.03)HIEAIDVR	63.96	1062.55	9	0	532.28	2	16.5512	1800000	9950000	3162	20210602_HS_50ng_PLUG-10.raw	7	P04114|APOB_HUMAN	Pyro-glu from Q		FALSE
Q(-17.03)IDDIDVR	39.93	955.461	8	-1.7	478.739	2	16.8553	58600	427000	3484	20210526_HS_PLUG-3.raw	1	P04114|APOB_HUMAN	Pyro-glu from Q		FALSE
Q(-17.03)INDYVEK	45.55	990.466	8	-0.3	496.24	2	13.443	4350000	9650000	2459	20210602_HS_50ng_PLUG-15.raw	15		Pyro-glu from Q		FALSE
Q(-17.03)ISNLQQSISDAEQR	60.63	1698.82	15	2	850.421	2	20.85	925000	11000000	4947	20210526_HS_PLUG-2.raw	8	#CONTAM#cont|000132|;#CONTAM#cont|000135|;#CONTAM#cont|000134|;P04264|K2C1_HUMAN	Pyro-glu from Q		FALSE
Q(-17.03)KPDGVFQEDAPVIHQEM(+15.99)IGGLR	55.86	2562.25	23	0.1	855.095	3	22.4636	1720000	25000000	5458	20210526_HS_PLUG-3.raw	4	P01024|CO3_HUMAN	Pyro-glu from Q; Oxidation (M)		FALSE
Q(-17.03)KWEAEPVYVQR	48.25	1514.75	12	5	758.39	2	18.9534	47900	935000	4266	20210526_HS_PLUG-2.raw	2	C9JEV0|C9JEV0_HUMAN;P25311|ZA2G_HUMAN	Pyro-glu from Q		FALSE
Q(-17.03)LGAGSIEEC(+57.02)AAK	61.57	1315.61	13	-2.2	658.81	2	16.7731	353000	4150000	3153	20210602_HS_50ng_PLUG-14.raw	8	P00747|PLMN_HUMAN	Pyro-glu from Q; Carbamidomethylation	C10:Carbamidomethylation:1000.00	FALSE
Q(-17.03)LNEINYEDHK	58.43	1384.63	11	0	693.32	2	16.4225	5060000	35300000	3095	20210602_HS_50ng_PLUG-15.raw	21	E7ETN3|E7ETN3_HUMAN;P00751|CFAB_HUMAN;A0A0G2JH38|A0A0G2JH38_HUMAN;B4E1Z4|B4E1Z4_HUMAN	Pyro-glu from Q		FALSE
Q(-17.03)N(+0.98)C(+57.02)ELFE(+21.98)QLGEYK	45.61	1662.68	13	2.7	832.355	2	24.2014	686000	4990000	6153	20210526_HS_PLUG-2.raw	3	A0A0C4DGB6|A0A0C4DGB6_HUMAN;A0A087WWT3|A0A087WWT3_HUMAN;P02768|ALBU_HUMAN;C9JKR2|C9JKR2_HUMAN;D6RHD5|D6RHD5_HUMAN;B7WNR0|B7WNR0_HUMAN;H0YA55|H0YA55_HUMAN	Pyro-glu from Q; Deamidation (NQ); Carbamidomethylation; Sodium adduct	Q1:Pyro-glu from Q:1000.00;N2:Deamidation (NQ):24.78;C3:Carbamidomethylation:1000.00;E7:Sodium adduct:41.59	FALSE
Q(-17.03)NC(+57.02)E(+21.98)LFE(+21.98)QLGEYK	34.15	1683.68	13	-1.4	842.847	2	23.5916	879000	10300000	5147	20210602_HS_50ng_PLUG-4.raw	12	A0A0C4DGB6|A0A0C4DGB6_HUMAN;A0A087WWT3|A0A087WWT3_HUMAN;P02768|ALBU_HUMAN;C9JKR2|C9JKR2_HUMAN;D6RHD5|D6RHD5_HUMAN;B7WNR0|B7WNR0_HUMAN;H0YA55|H0YA55_HUMAN	Pyro-glu from Q; Carbamidomethylation; Sodium adduct; Sodium adduct	Q1:Pyro-glu from Q:1000.00;C3:Carbamidomethylation:1000.00;E4:Sodium adduct:11.94;E7:Sodium adduct:28.70	FALSE
Q(-17.03)NC(+57.02)E(+21.98)LFEQ(+0.98)LGEYK	43.23	1662.68	13	5.9	555.241	3	23.614	616000	3790000	5940	20210526_HS_PLUG-2.raw	6	A0A0C4DGB6|A0A0C4DGB6_HUMAN;A0A087WWT3|A0A087WWT3_HUMAN;P02768|ALBU_HUMAN;C9JKR2|C9JKR2_HUMAN;D6RHD5|D6RHD5_HUMAN;B7WNR0|B7WNR0_HUMAN;H0YA55|H0YA55_HUMAN	Pyro-glu from Q; Carbamidomethylation; Sodium adduct; Deamidation (NQ)	Q1:Pyro-glu from Q:1000.00;C3:Carbamidomethylation:1000.00;E4:Sodium adduct:7.77;Q8:Deamidation (NQ):34.81	FALSE
Q(-17.03)NC(+57.02)E(+21.98)LFEQLGEYK	69.34	1661.7	13	1.9	831.863	2	23.6331	18900000	148000000	5929	20210526_HS_PLUG-2.raw	20	A0A0C4DGB6|A0A0C4DGB6_HUMAN;A0A087WWT3|A0A087WWT3_HUMAN;P02768|ALBU_HUMAN;C9JKR2|C9JKR2_HUMAN;D6RHD5|D6RHD5_HUMAN;B7WNR0|B7WNR0_HUMAN;H0YA55|H0YA55_HUMAN	Pyro-glu from Q; Carbamidomethylation; Sodium adduct	Q1:Pyro-glu from Q:1000.00;C3:Carbamidomethylation:1000.00;E4:Sodium adduct:0.00	FALSE
Q(-17.03)NC(+57.02)ELFE(+21.98)Q(+0.98)LGEYK	31.25	1662.68	13	7.9	832.36	2	25.79	32800	335000	6657	20210526_HS_PLUG-2.raw	1	A0A0C4DGB6|A0A0C4DGB6_HUMAN;A0A087WWT3|A0A087WWT3_HUMAN;P02768|ALBU_HUMAN;C9JKR2|C9JKR2_HUMAN;D6RHD5|D6RHD5_HUMAN;B7WNR0|B7WNR0_HUMAN;H0YA55|H0YA55_HUMAN	Pyro-glu from Q; Carbamidomethylation; Sodium adduct; Deamidation (NQ)	Q1:Pyro-glu from Q:1000.00;C3:Carbamidomethylation:1000.00;E7:Sodium adduct:12.33;Q8:Deamidation (NQ):0.00	FALSE
Q(-17.03)NC(+57.02)ELFE(+21.98)QLGEYK	76.91	1661.7	13	4.1	831.861	2	23.6751	41000000	352000000	5002	20210602_HS_50ng_PLUG-15.raw	36	A0A0C4DGB6|A0A0C4DGB6_HUMAN;A0A087WWT3|A0A087WWT3_HUMAN;P02768|ALBU_HUMAN;C9JKR2|C9JKR2_HUMAN;D6RHD5|D6RHD5_HUMAN;B7WNR0|B7WNR0_HUMAN;H0YA55|H0YA55_HUMAN	Pyro-glu from Q; Carbamidomethylation; Sodium adduct	Q1:Pyro-glu from Q:1000.00;C3:Carbamidomethylation:1000.00;E7:Sodium adduct:56.34	FALSE
Q(-17.03)NC(+57.02)ELFEQLGEYK	83.16	1639.72	13	-1.8	820.865	2	23.6463	192000000	2490000000	5216	20210602_HS_50ng_PLUG-12.raw	162	A0A0C4DGB6|A0A0C4DGB6_HUMAN;A0A087WWT3|A0A087WWT3_HUMAN;P02768|ALBU_HUMAN;C9JKR2|C9JKR2_HUMAN;D6RHD5|D6RHD5_HUMAN;B7WNR0|B7WNR0_HUMAN;H0YA55|H0YA55_HUMAN	Pyro-glu from Q; Carbamidomethylation	C3:Carbamidomethylation:1000.00	FALSE
Q(-17.03)PSSAFAAFVK	72.33	1134.57	11	1.8	568.294	2	22.9001	10100000	65300000	4990	20210602_HS_50ng_PLUG-5.raw	15	P01024|CO3_HUMAN	Pyro-glu from Q		FALSE
Q(-17.03)PVPGQQM(+15.99)TLK	40.92	1224.62	11	0.6	613.316	2	11.5999	3740000	6770000	2122	20210602_HS_50ng_PLUG-4.raw	8	P01024|CO3_HUMAN	Pyro-glu from Q; Oxidation (M)		FALSE
Q(-17.03)QNAQ(+0.98)GGFSSTQ(+0.98)DTVVALHALSK	56.15	2371.13	23	8.9	1186.59	2	22.3218			5486	20210526_HS_PLUG-2.raw	1	P01023|A2MG_HUMAN	Pyro-glu from Q; Deamidation (NQ); Deamidation (NQ)	Q1:Pyro-glu from Q:1000.00;Q5:Deamidation (NQ):32.28;Q12:Deamidation (NQ):18.61	FALSE
Q(-17.03)QNAQGGFSSTQD(+21.98)TVVALHALSK	58.07	2391.14	23	1	798.059	3	22.3512	224000	3710000	5499	20210526_HS_PLUG-2.raw	3	P01023|A2MG_HUMAN	Pyro-glu from Q; Sodium adduct	Q1:Pyro-glu from Q:1000.00;D13:Sodium adduct:85.84	FALSE
Q(-17.03)QNAQGGFSSTQDTVVALHALSK	70.7	2369.16	23	-1	1185.59	2	22.3512	2310000	27800000	5509	20210526_HS_PLUG-2.raw	18	P01023|A2MG_HUMAN	Pyro-glu from Q		FALSE
Q(-17.03)QTHM(+15.99)LDVM(+15.99)QDHFSR	38.61	1886.8	15	0.7	629.945	3	15.4567	524000	2570000	3122	20210526_HS_PLUG-2.raw	3	H0YLK8|H0YLK8_HUMAN;P10909|CLUS_HUMAN;H0YC35|H0YC35_HUMAN;E7ETB4|E7ETB4_HUMAN;E7ERK6|E7ERK6_HUMAN	Pyro-glu from Q; Oxidation (M); Oxidation (M)		FALSE
Q(-17.03)SEDSTFYLGER	61.88	1413.6	12	2.8	707.815	2	18.4896	1920000	16100000	4083	20210526_HS_PLUG-2.raw	16	E9PFZ2|E9PFZ2_HUMAN;H7C5R1|H7C5R1_HUMAN;P00450|CERU_HUMAN	Pyro-glu from Q		FALSE
Q(-17.03)SLEASLAETEGR	66.18	1372.65	13	3.2	687.333	2	18.6201	630000	7500000	3728	20210602_HS_50ng_PLUG-5.raw	14	#CONTAM#cont|000133|;#CONTAM#cont|000131|;P13645|K1C10_HUMAN;#CONTAM#cont|000129|;#CONTAM#cont|000136|;#CONTAM#cont|000122|;#CONTAM#cont|000130|	Pyro-glu from Q		FALSE
Q(-17.03)SSSYSFFK	33.3	1062.47	9	3.8	532.244	2	19.339	37800	320000	4385	20210526_HS_PLUG-2.raw	1	P04003|C4BPA_HUMAN	Pyro-glu from Q		FALSE
Q(-17.03)SVEADIN(+0.98)GLR	38.3	1184.57	11	2.9	593.295	2	17.1138	201000	1630000	3627	20210526_HS_PLUG-2.raw	3	#CONTAM#cont|000133|;#CONTAM#cont|000131|;P13645|K1C10_HUMAN;#CONTAM#cont|000129|;#CONTAM#cont|000136|;#CONTAM#cont|000122|;#CONTAM#cont|000130|	Pyro-glu from Q; Deamidation (NQ)		FALSE
Q(-17.03)SVEADINGLR	32.29	1183.58	11	2.8	592.801	2	18.7518	185000	2320000	3747	20210602_HS_50ng_PLUG-7.raw	7	#CONTAM#cont|000133|;#CONTAM#cont|000131|;P13645|K1C10_HUMAN;#CONTAM#cont|000129|;#CONTAM#cont|000136|;#CONTAM#cont|000122|;#CONTAM#cont|000130|	Pyro-glu from Q		FALSE
Q(-17.03)TALVE(+21.98)LVK	44.06	1004.55	9	-2.6	503.282	2	22.3004	92100000	1460000000	4702	20210602_HS_50ng_PLUG-11.raw	44	A0A0C4DGB6|A0A0C4DGB6_HUMAN;A0A087WWT3|A0A087WWT3_HUMAN;P02768|ALBU_HUMAN;C9JKR2|C9JKR2_HUMAN;D6RHD5|D6RHD5_HUMAN;B7WNR0|B7WNR0_HUMAN;H0YA55|H0YA55_HUMAN	Pyro-glu from Q; Sodium adduct	Q1:Pyro-glu from Q:1000.00;E6:Sodium adduct:68.23	FALSE
Q(-17.03)TALVELVK	60.89	982.57	9	-4.9	492.292	2	22.3043	390000000	4470000000	5449	20210526_HS_PLUG-2.raw	154	A0A0C4DGB6|A0A0C4DGB6_HUMAN;A0A087WWT3|A0A087WWT3_HUMAN;P02768|ALBU_HUMAN;C9JKR2|C9JKR2_HUMAN;D6RHD5|D6RHD5_HUMAN;B7WNR0|B7WNR0_HUMAN;H0YA55|H0YA55_HUMAN	Pyro-glu from Q		FALSE
Q(-17.03)THQPPAPNSLIR	53.91	1440.75	13	1	721.382	2	16.8685	719000	7150000	3256	20210602_HS_50ng_PLUG-12.raw	8	P02747|C1QC_HUMAN	Pyro-glu from Q		FALSE
Q(-17.03)TQVSVLPEGGETPLFK	60.28	1811.93	17	2.6	906.978	2	24.3938	678000	7440000	6078	20210526_HS_PLUG-3.raw	10	A0A0A0MS51|A0A0A0MS51_HUMAN;P06396|GELS_HUMAN;A0A0A0MT01|A0A0A0MT01_HUMAN	Pyro-glu from Q		FALSE
Q(-17.03)TVSWAVTPK	61.04	1098.57	10	1.2	550.293	2	19.3195	2590000	25900000	3900	20210602_HS_50ng_PLUG-12.raw	16	P01023|A2MG_HUMAN	Pyro-glu from Q		FALSE
Q(-17.03)VGSGVTTD(+21.98)QVQAEAK	62.83	1621.76	16	0.4	811.886	2	14.9084	1630000	10600000	2778	20210602_HS_50ng_PLUG-10.raw	14	P01871|IGHM_HUMAN	Pyro-glu from Q; Sodium adduct	Q1:Pyro-glu from Q:1000.00;D9:Sodium adduct:86.16	FALSE
Q(-17.03)VGSGVTTDQVQAEAK	69.51	1599.77	16	2.4	800.896	2	14.981	6650000	39500000	2760	20210602_HS_50ng_PLUG-13.raw	21	P01871|IGHM_HUMAN	Pyro-glu from Q		FALSE
Q(-17.03)VLDNLTM(+15.99)EK	43.93	1188.57	10	2.8	595.294	2	18.1616	868000	7080000	3511	20210602_HS_50ng_PLUG-14.raw	12	K7EQQ3|K7EQQ3_HUMAN;P35527|K1C9_HUMAN	Pyro-glu from Q; Oxidation (M)		FALSE
Q(-17.03)VVAGLNFR	63.36	985.534	9	-0.1	493.774	2	21.4304	2850000	25100000	4454	20210602_HS_50ng_PLUG-15.raw	15	P01042|KNG1_HUMAN	Pyro-glu from Q		FALSE
Q(-17.03)YYEGSEIVVAGR	66.26	1452.69	13	1.7	727.353	2	19.4585	610000	7740000	3983	20210602_HS_50ng_PLUG-5.raw	12	P19827|ITIH1_HUMAN;H7C0N0|H7C0N0_HUMAN	Pyro-glu from Q		FALSE
QAVDTAVDGVFIR	44.13	1389.73	13	2.1	695.874	2	20.5968	79000	1120000	4766	20210526_HS_PLUG-3.raw	2	P19827|ITIH1_HUMAN;F8WAS2|F8WAS2_HUMAN			FALSE
QEPERNEC(+57.02)FLQHKDDNPNLPR	33.3	2635.22	21	3.3	659.817	4	16.4697	176000	2290000	3427	20210526_HS_PLUG-2.raw	2	A0A0C4DGB6|A0A0C4DGB6_HUMAN;A0A087WWT3|A0A087WWT3_HUMAN;P02768|ALBU_HUMAN;H7C013|H7C013_HUMAN	Carbamidomethylation	C8:Carbamidomethylation:1000.00	FALSE
QEPSQGTTTFAVTSILR	70.41	1834.94	17	-3.1	918.476	2	24.6041	3260000	45600000	5314	20210602_HS_50ng_PLUG-8.raw	30	P01876|IGHA1_HUMAN;A0A286YEY1|A0A286YEY1_HUMAN			FALSE
QFSFPLSSEPFQGSYK	55.74	1847.87	16	2	924.949	2	25.0465	663000	6680000	6341	20210526_HS_PLUG-1.raw	4	P01023|A2MG_HUMAN			FALSE
QGLLPVLESFK	60.35	1229.7	11	1.4	615.861	2	26.0363	595000	4750000	6581	20210526_HS_PLUG-3.raw	4	F8W696|F8W696_HUMAN;P02647|APOA1_HUMAN			FALSE
QIQVSWLR	34.84	1028.58	8	1.4	515.298	2	21.0668	353000	3370000	4976	20210526_HS_PLUG-1.raw	3	P01871|IGHM_HUMAN			FALSE
QISNLQQSISDAEQR	55.99	1715.84	15	-0.5	858.932	2	17.7367	99600	1530000	3845	20210526_HS_PLUG-2.raw	3	#CONTAM#cont|000132|;#CONTAM#cont|000135|;#CONTAM#cont|000134|;P04264|K2C1_HUMAN			FALSE
QN(+0.98)C(+57.02)ELFEQLGEYK	63.26	1657.73	13	6.5	829.877	2	22.2107	4800000	29100000	4737	20210602_HS_50ng_PLUG-12.raw	7	A0A0C4DGB6|A0A0C4DGB6_HUMAN;A0A087WWT3|A0A087WWT3_HUMAN;P02768|ALBU_HUMAN;C9JKR2|C9JKR2_HUMAN;D6RHD5|D6RHD5_HUMAN;B7WNR0|B7WNR0_HUMAN;H0YA55|H0YA55_HUMAN	Deamidation (NQ); Carbamidomethylation	N2:Deamidation (NQ):7.21;C3:Carbamidomethylation:1000.00	FALSE
QNC(+57.02)ELFE(+21.98)QLGEYK	37.42	1678.73	13	0.2	840.375	2	21.8905	89500	1720000	5338	20210526_HS_PLUG-2.raw	2	A0A0C4DGB6|A0A0C4DGB6_HUMAN;A0A087WWT3|A0A087WWT3_HUMAN;P02768|ALBU_HUMAN;C9JKR2|C9JKR2_HUMAN;D6RHD5|D6RHD5_HUMAN;B7WNR0|B7WNR0_HUMAN;H0YA55|H0YA55_HUMAN	Carbamidomethylation; Sodium adduct	C3:Carbamidomethylation:1000.00;E7:Sodium adduct:11.59	FALSE
QNC(+57.02)ELFEQ(+0.98)LGEYK	39.24	1657.73	13	-6.3	829.867	2	23.5287	404000	13500000	5101	20210602_HS_50ng_PLUG-7.raw	2	A0A0C4DGB6|A0A0C4DGB6_HUMAN;A0A087WWT3|A0A087WWT3_HUMAN;P02768|ALBU_HUMAN;C9JKR2|C9JKR2_HUMAN;D6RHD5|D6RHD5_HUMAN;B7WNR0|B7WNR0_HUMAN;H0YA55|H0YA55_HUMAN	Carbamidomethylation; Deamidation (NQ)	C3:Carbamidomethylation:1000.00;Q8:Deamidation (NQ):10.99	FALSE
QNC(+57.02)ELFEQLGEYK	65.23	1656.75	13	2.7	553.26	3	21.8905	21900000	217000000	5331	20210526_HS_PLUG-2.raw	33	A0A0C4DGB6|A0A0C4DGB6_HUMAN;A0A087WWT3|A0A087WWT3_HUMAN;P02768|ALBU_HUMAN;C9JKR2|C9JKR2_HUMAN;D6RHD5|D6RHD5_HUMAN;B7WNR0|B7WNR0_HUMAN;H0YA55|H0YA55_HUMAN	Carbamidomethylation	C3:Carbamidomethylation:1000.00	FALSE
QQN(+0.98)AQGGFSSTQDTVVALHALSK	30.29	2387.17	23	3.7	796.737	3	21.5591	37800	571000	5173	20210526_HS_PLUG-1.raw	1	P01023|A2MG_HUMAN	Deamidation (NQ)	N3:Deamidation (NQ):0.00	FALSE
QQNAQGGFSSTQDTVVALHALSK	61.23	2386.19	23	3.6	796.409	3	21.3289	679000	9930000	5075	20210526_HS_PLUG-1.raw	4	P01023|A2MG_HUMAN			FALSE
QSEDSTFYLGER	34.68	1430.63	12	-0.3	716.326	2	16.6836	19700	280000	3501	20210526_HS_PLUG-2.raw	1	E9PFZ2|E9PFZ2_HUMAN;H7C5R1|H7C5R1_HUMAN;P00450|CERU_HUMAN			FALSE
QTALVE(+21.98)LVK	37.45	1021.58	9	-0.8	511.798	2	18.8553	509000	4070000	4210	20210526_HS_PLUG-2.raw	4	A0A0C4DGB6|A0A0C4DGB6_HUMAN;A0A087WWT3|A0A087WWT3_HUMAN;P02768|ALBU_HUMAN;C9JKR2|C9JKR2_HUMAN;D6RHD5|D6RHD5_HUMAN;B7WNR0|B7WNR0_HUMAN;H0YA55|H0YA55_HUMAN	Sodium adduct	E6:Sodium adduct:40.63	FALSE
QTALVELVK	53.14	999.596	9	-1.7	500.805	2	18.7879	96900000	826000000	3740	20210602_HS_50ng_PLUG-5.raw	78	A0A0C4DGB6|A0A0C4DGB6_HUMAN;A0A087WWT3|A0A087WWT3_HUMAN;P02768|ALBU_HUMAN;C9JKR2|C9JKR2_HUMAN;D6RHD5|D6RHD5_HUMAN;B7WNR0|B7WNR0_HUMAN;H0YA55|H0YA55_HUMAN			FALSE
QTVSWAVTPK	47.34	1115.6	10	1.4	558.809	2	16.8492	473000	3470000	3573	20210526_HS_PLUG-2.raw	4	P01023|A2MG_HUMAN			FALSE
QVGSGVTTDQVQAEAK	43.36	1616.8	16	-3.6	809.408	2	6.6288			1272	20210526_HS_PLUG-3.raw	1	P01871|IGHM_HUMAN			FALSE
QVVAGLNFR	48.15	1002.56	9	3.1	502.291	2	18.5276	362000	3080000	4111	20210526_HS_PLUG-2.raw	3	P01042|KNG1_HUMAN			FALSE
RHPDYSVVLLLR	68.69	1466.84	12	1.5	489.955	3	22.9239	3010000	11200000	5704	20210526_HS_PLUG-2.raw	3	A0A0C4DGB6|A0A0C4DGB6_HUMAN;P02768|ALBU_HUMAN;C9JKR2|C9JKR2_HUMAN;D6RHD5|D6RHD5_HUMAN;B7WNR0|B7WNR0_HUMAN;H0YA55|H0YA55_HUMAN			FALSE
RIPIEDGSGEVVLSR	80.59	1625.87	15	3.5	542.967	3	18.8131	2760000	25500000	3721	20210602_HS_50ng_PLUG-15.raw	17	P01024|CO3_HUMAN			FALSE
RPC(+57.02)FSALE(+21.98)VDETYVPK	48.28	1931.91	16	2.3	644.977	3	21.5932	1390000	12500000	4632	20210602_HS_50ng_PLUG-5.raw	11	A0A0C4DGB6|A0A0C4DGB6_HUMAN;A0A087WWT3|A0A087WWT3_HUMAN;P02768|ALBU_HUMAN;C9JKR2|C9JKR2_HUMAN;D6RHD5|D6RHD5_HUMAN;B7WNR0|B7WNR0_HUMAN;H0YA55|H0YA55_HUMAN	Carbamidomethylation; Sodium adduct	C3:Carbamidomethylation:1000.00;E8:Sodium adduct:9.74	FALSE
RPC(+57.02)FSALEVD(+21.98)ETYVPK	50.5	1931.91	16	2.1	644.98	3	21.6686	280000	6430000	5258	20210526_HS_PLUG-2.raw	1	A0A0C4DGB6|A0A0C4DGB6_HUMAN;A0A087WWT3|A0A087WWT3_HUMAN;P02768|ALBU_HUMAN;C9JKR2|C9JKR2_HUMAN;D6RHD5|D6RHD5_HUMAN;B7WNR0|B7WNR0_HUMAN;H0YA55|H0YA55_HUMAN	Carbamidomethylation; Sodium adduct	C3:Carbamidomethylation:1000.00;D10:Sodium adduct:17.01	FALSE
RPC(+57.02)FSALEVDE(+21.98)TYVPK	48.29	1931.91	16	1.4	644.977	3	21.7184	897000	7110000	4600	20210602_HS_50ng_PLUG-8.raw	2	A0A0C4DGB6|A0A0C4DGB6_HUMAN;A0A087WWT3|A0A087WWT3_HUMAN;P02768|ALBU_HUMAN;C9JKR2|C9JKR2_HUMAN;D6RHD5|D6RHD5_HUMAN;B7WNR0|B7WNR0_HUMAN;H0YA55|H0YA55_HUMAN	Carbamidomethylation; Sodium adduct	C3:Carbamidomethylation:1000.00;E11:Sodium adduct:7.21	FALSE
RPC(+57.02)FSALEVDETYVPK	73	1909.92	16	-7.6	637.644	3	21.5819	108000000	1350000000	4622	20210602_HS_50ng_PLUG-5.raw	205	A0A0C4DGB6|A0A0C4DGB6_HUMAN;A0A087WWT3|A0A087WWT3_HUMAN;P02768|ALBU_HUMAN;C9JKR2|C9JKR2_HUMAN;D6RHD5|D6RHD5_HUMAN;B7WNR0|B7WNR0_HUMAN;H0YA55|H0YA55_HUMAN	Carbamidomethylation	C3:Carbamidomethylation:1000.00	FALSE
RQEC(+57.02)SIPVC(+57.02)GQ(+0.98)DQVTVAM(+15.99)TPR	37.56	2448.12	21	7.4	817.056	3	17.666	33200	577000	3793	20210526_HS_PLUG-1.raw	1	C9JV37|C9JV37_HUMAN;P00734|THRB_HUMAN;E9PIT3|E9PIT3_HUMAN	Carbamidomethylation; Carbamidomethylation; Deamidation (NQ); Oxidation (M)	C4:Carbamidomethylation:1000.00;C9:Carbamidomethylation:1000.00;Q11:Deamidation (NQ):14.04;M18:Oxidation (M):1000.00	FALSE
RQEC(+57.02)SIPVC(+57.02)GQDQVTVAM(+15.99)TPR	49.66	2447.14	21	3.9	816.725	3	17.706	84700	1540000	3751	20210526_HS_PLUG-3.raw	3	C9JV37|C9JV37_HUMAN;P00734|THRB_HUMAN;E9PIT3|E9PIT3_HUMAN	Carbamidomethylation; Carbamidomethylation; Oxidation (M)	C4:Carbamidomethylation:1000.00;C9:Carbamidomethylation:1000.00	FALSE
RTHLPEVFLSK	47.3	1325.75	11	0.6	442.924	3	18.9173	397000	4000000	4212	20210526_HS_PLUG-1.raw	3	P02774|VTDB_HUMAN;D6RF35|D6RF35_HUMAN			FALSE
RTVAAPSVFIFPPSDEQLK	41.59	2101.12	19	-0.8	701.383	3	25.0672	588000	2490000	6355	20210526_HS_PLUG-2.raw	3	P01834|IGKC_HUMAN			FALSE
RYLQ(+0.98)FDIK	38.34	1082.58	8	0.9	542.296	2	19.2398	15700000	119000000	3952	20210602_HS_50ng_PLUG-5.raw	19		Deamidation (NQ)		FALSE
SASDLTWDNLK	67.66	1248.6	11	-4	625.304	2	18.9776	23700000	192000000	3769	20210602_HS_50ng_PLUG-15.raw	27	H7C5E8|H7C5E8_HUMAN;P02787|TRFE_HUMAN			FALSE
SASNM(+15.99)AIVDVK	49.94	1149.57	11	-1.9	575.791	2	7.3071	7620000	16500000	1408	20210602_HS_50ng_PLUG-12.raw	10	P01023|A2MG_HUMAN	Oxidation (M)		FALSE
SC(+57.02)AVAEYGVYVK	76.19	1344.64	12	0.8	673.327	2	17.6452	34500000	372000000	3438	20210602_HS_50ng_PLUG-5.raw	40	P00738|HPT_HUMAN;J3QLC9|J3QLC9_HUMAN;A0A087WU08|A0A087WU08_HUMAN;H0Y300|H0Y300_HUMAN;A0A0C4DGL8|A0A0C4DGL8_HUMAN;J3QR68|J3QR68_HUMAN	Carbamidomethylation	C2:Carbamidomethylation:1000.00	FALSE
SC(+57.02)DNPYIPN(+0.98)GDYSPLR	78.06	1867.8	16	1.1	934.914	2	20.4696	387000	3920000	4821	20210526_HS_PLUG-2.raw	3	A0A0D9SG88|A0A0D9SG88_HUMAN;P08603|CFAH_HUMAN;Q5TFM2|Q5TFM2_HUMAN	Carbamidomethylation; Deamidation (NQ)	C2:Carbamidomethylation:1000.00;N9:Deamidation (NQ):79.02	FALSE
SC(+57.02)ESNSPFPVHPGTAEC(+57.02)C(+57.02)TK	32.1	2263.93	20	2.7	755.655	3	16.244	151000	1950000	3310	20210526_HS_PLUG-3.raw	4	D6RBJ7|D6RBJ7_HUMAN;P02774|VTDB_HUMAN;D6RF20|D6RF20_HUMAN;D6RF35|D6RF35_HUMAN	Carbamidomethylation; Carbamidomethylation; Carbamidomethylation	C2:Carbamidomethylation:1000.00;C17:Carbamidomethylation:1000.00;C18:Carbamidomethylation:1000.00	FALSE
SDVGFLPPFPTLDPEEK	42.45	1886.93	17	1.3	944.477	2	27.6338	268000	2550000	7087	20210526_HS_PLUG-2.raw	2	P43652|AFAM_HUMAN			FALSE
SDVVYTDWK	55.75	1111.52	9	1.4	556.767	2	16.5006	4620000	15400000	3131	20210602_HS_50ng_PLUG-10.raw	16	P02763|A1AG1_HUMAN			FALSE
SEETKENEGFTVTAEGK	41.67	1854.85	17	-0.9	619.289	3	7.9518	128000	1150000	1510	20210602_HS_50ng_PLUG-9.raw	3	P01024|CO3_HUMAN;M0QYC8|M0QYC8_HUMAN			FALSE
SEGSSVNLSPPLEQC(+57.02)VPDR	30.17	2069.97	19	3.8	1036	2	19.9286	494000	4750000	4517	20210526_HS_PLUG-3.raw	4	C9JV37|C9JV37_HUMAN;P00734|THRB_HUMAN;E9PIT3|E9PIT3_HUMAN	Carbamidomethylation	C15:Carbamidomethylation:1000.00	FALSE
SEILAHWSPAK	32.75	1237.65	11	0.1	619.832	2	17.6488	16500	357000	3783	20210526_HS_PLUG-1.raw	1	P04114|APOB_HUMAN			FALSE
SELEEQLTPVAEETR	68.03	1729.84	15	2.7	865.932	2	18.4047	1170000	13600000	4059	20210526_HS_PLUG-2.raw	15	E7ERP7|E7ERP7_HUMAN;E9PEV4|E9PEV4_HUMAN;P02649|APOE_HUMAN;H0Y7L5|H0Y7L5_HUMAN			FALSE
SEYQADYESLR	54.56	1359.59	11	0.1	680.804	2	14.5716	1640000	7640000	2721	20210602_HS_50ng_PLUG-5.raw	13	P04114|APOB_HUMAN			FALSE
SGAQATWTELPWPHEK	60.12	1836.88	16	3.1	613.305	3	23.1601	1290000	10400000	5775	20210526_HS_PLUG-2.raw	3	P02790|HEMO_HUMAN			FALSE
SGIPIVTSPYQIHFTK	68.09	1786.96	16	-0.7	596.663	3	24.0567	3190000	31500000	6090	20210526_HS_PLUG-2.raw	5	P01024|CO3_HUMAN			FALSE
SGLSTGWTQLSK	49.66	1263.65	12	1.6	632.831	2	18.821	2840000	22000000	3752	20210602_HS_50ng_PLUG-10.raw	15	P04217|A1BG_HUMAN;M0R009|M0R009_HUMAN			FALSE
SGSSTASWIQNVDTK	49.76	1579.75	15	5.9	790.889	2	18.111	71100	781000	3960	20210526_HS_PLUG-2.raw	1	P04114|APOB_HUMAN			FALSE
SGTASVVC(+57.02)LLN(+0.98)NFYPR	74.66	1797.87	16	1.4	899.948	2	24.5529	18100000	143000000	6214	20210526_HS_PLUG-2.raw	40	A0A5H1ZRQ3|A0A5H1ZRQ3_HUMAN;P01834|IGKC_HUMAN	Carbamidomethylation; Deamidation (NQ)	C8:Carbamidomethylation:1000.00;N11:Deamidation (NQ):17.01	FALSE
SGTASVVC(+57.02)LLNN(+0.98)FYPR	67.88	1797.87	16	1.6	899.948	2	25.9459	3880000	29000000	6533	20210526_HS_PLUG-3.raw	9	A0A5H1ZRQ3|A0A5H1ZRQ3_HUMAN;P01834|IGKC_HUMAN	Carbamidomethylation; Deamidation (NQ)	C8:Carbamidomethylation:1000.00;N12:Deamidation (NQ):17.01	FALSE
SGTASVVC(+57.02)LLNNFYPR	78.35	1796.89	16	-2.9	899.452	2	27.3658	24100000	186000000	6999	20210526_HS_PLUG-2.raw	25	A0A5H1ZRQ3|A0A5H1ZRQ3_HUMAN;P01834|IGKC_HUMAN	Carbamidomethylation	C8:Carbamidomethylation:1000.00	FALSE
SGTSASLAISGLR	71.64	1218.66	13	2.5	610.337	2	18.2111	3390000	31500000	3551	20210602_HS_50ng_PLUG-15.raw	15				FALSE
SHC(+57.02)IAE(+21.98)VE(+21.98)NDE(+21.98)MPADLPSLAADFVESK	62.77	3039.28	27	9.2	1014.12	3	26.9436	675000	5700000	6898	20210526_HS_PLUG-2.raw	1	A0A0C4DGB6|A0A0C4DGB6_HUMAN;P02768|ALBU_HUMAN;C9JKR2|C9JKR2_HUMAN;D6RHD5|D6RHD5_HUMAN;B7WNR0|B7WNR0_HUMAN;H0YA55|H0YA55_HUMAN	Carbamidomethylation; Sodium adduct; Sodium adduct; Sodium adduct	C3:Carbamidomethylation:1000.00;E6:Sodium adduct:0.00;E8:Sodium adduct:0.00;E11:Sodium adduct:0.00	FALSE
SHC(+57.02)IAE(+21.98)VE(+21.98)NDEM(+15.99)PADLPSLAADFVESK	51.83	3033.3	27	9.6	1012.12	3	26.6267	4260000	22900000	6869	20210526_HS_PLUG-2.raw	1	A0A0C4DGB6|A0A0C4DGB6_HUMAN;P02768|ALBU_HUMAN;C9JKR2|C9JKR2_HUMAN;D6RHD5|D6RHD5_HUMAN;B7WNR0|B7WNR0_HUMAN;H0YA55|H0YA55_HUMAN	Carbamidomethylation; Sodium adduct; Sodium adduct; Oxidation (M)	C3:Carbamidomethylation:1000.00;E6:Sodium adduct:0.00;E8:Sodium adduct:0.00;M12:Oxidation (M):1000.00	FALSE
SHC(+57.02)IAE(+21.98)VEND(+21.98)EM(+15.99)PADLPSLAADFVESK	64.96	3033.3	27	8.3	1012.12	3	26.6246	5700000	31000000	6901	20210526_HS_PLUG-1.raw	1	A0A0C4DGB6|A0A0C4DGB6_HUMAN;P02768|ALBU_HUMAN;C9JKR2|C9JKR2_HUMAN;D6RHD5|D6RHD5_HUMAN;B7WNR0|B7WNR0_HUMAN;H0YA55|H0YA55_HUMAN	Carbamidomethylation; Sodium adduct; Sodium adduct; Oxidation (M)	C3:Carbamidomethylation:1000.00;E6:Sodium adduct:0.00;D10:Sodium adduct:0.00;M12:Oxidation (M):1000.00	FALSE
SHC(+57.02)IAE(+21.98)VEND(+21.98)EMPADLPSLAADFVESK	58.76	3017.3	27	5.3	1006.78	3	26.9689	4700000	32600000	7028	20210526_HS_PLUG-1.raw	1	A0A0C4DGB6|A0A0C4DGB6_HUMAN;P02768|ALBU_HUMAN;C9JKR2|C9JKR2_HUMAN;D6RHD5|D6RHD5_HUMAN;B7WNR0|B7WNR0_HUMAN;H0YA55|H0YA55_HUMAN	Carbamidomethylation; Sodium adduct; Sodium adduct	C3:Carbamidomethylation:1000.00;E6:Sodium adduct:0.00;D10:Sodium adduct:0.00	FALSE
SHC(+57.02)IAEVE(+21.98)N(+0.98)DEM(+15.99)PADLPSLAADFVESK	66.64	3012.3	27	5.3	754.089	4	25.9687	18100	488000	6637	20210526_HS_PLUG-1.raw	2	A0A0C4DGB6|A0A0C4DGB6_HUMAN;P02768|ALBU_HUMAN;C9JKR2|C9JKR2_HUMAN;D6RHD5|D6RHD5_HUMAN;B7WNR0|B7WNR0_HUMAN;H0YA55|H0YA55_HUMAN	Carbamidomethylation; Sodium adduct; Deamidation (NQ); Oxidation (M)	C3:Carbamidomethylation:1000.00;E8:Sodium adduct:0.00;N9:Deamidation (NQ):1000.00;M12:Oxidation (M):1000.00	FALSE
SHC(+57.02)IAEVEN(+0.98)DEM(+15.99)PADLPSLAADFVESK	84.51	2990.32	27	4	997.787	3	26.0832	21000000	599000000	7264	20210526_HS_PLUG-2.raw	8	A0A0C4DGB6|A0A0C4DGB6_HUMAN;P02768|ALBU_HUMAN;C9JKR2|C9JKR2_HUMAN;D6RHD5|D6RHD5_HUMAN;B7WNR0|B7WNR0_HUMAN;H0YA55|H0YA55_HUMAN	Carbamidomethylation; Deamidation (NQ); Oxidation (M)	C3:Carbamidomethylation:1000.00	FALSE
SHC(+57.02)IAEVEN(+0.98)DEMPADLPSLAADFVESK	58.42	2974.32	27	-3.9	992.448	3	26.3089	433000	3780000	6757	20210526_HS_PLUG-2.raw	4	A0A0C4DGB6|A0A0C4DGB6_HUMAN;P02768|ALBU_HUMAN;C9JKR2|C9JKR2_HUMAN;D6RHD5|D6RHD5_HUMAN;B7WNR0|B7WNR0_HUMAN;H0YA55|H0YA55_HUMAN	Carbamidomethylation; Deamidation (NQ)	C3:Carbamidomethylation:1000.00	FALSE
SHC(+57.02)IAEVEND(+21.98)EM(+15.99)PAD(+21.98)LPSLAADFVESK	70.76	3033.3	27	3.2	1012.11	3	25.9683	14400	346000	6671	20210526_HS_PLUG-2.raw	1	A0A0C4DGB6|A0A0C4DGB6_HUMAN;P02768|ALBU_HUMAN;C9JKR2|C9JKR2_HUMAN;D6RHD5|D6RHD5_HUMAN;B7WNR0|B7WNR0_HUMAN;H0YA55|H0YA55_HUMAN	Carbamidomethylation; Sodium adduct; Oxidation (M); Sodium adduct	C3:Carbamidomethylation:1000.00;D10:Sodium adduct:0.00;M12:Oxidation (M):1000.00;D15:Sodium adduct:0.00	FALSE
SHC(+57.02)IAEVEND(+21.98)EM(+15.99)PADLPSLAADFVESK	61.93	3011.31	27	-2.2	1004.78	3	26.149			6620	20210526_HS_PLUG-3.raw	1	A0A0C4DGB6|A0A0C4DGB6_HUMAN;P02768|ALBU_HUMAN;C9JKR2|C9JKR2_HUMAN;D6RHD5|D6RHD5_HUMAN;B7WNR0|B7WNR0_HUMAN;H0YA55|H0YA55_HUMAN	Carbamidomethylation; Sodium adduct; Oxidation (M)	C3:Carbamidomethylation:1000.00;D10:Sodium adduct:0.00;M12:Oxidation (M):1000.00	FALSE
SHC(+57.02)IAEVENDE(+21.98)M(+15.99)PADLPSLAADFVESK	85.98	3011.31	27	1.3	753.84	4	26.026	1830000	25400000	6577	20210526_HS_PLUG-3.raw	3	A0A0C4DGB6|A0A0C4DGB6_HUMAN;P02768|ALBU_HUMAN;C9JKR2|C9JKR2_HUMAN;D6RHD5|D6RHD5_HUMAN;B7WNR0|B7WNR0_HUMAN;H0YA55|H0YA55_HUMAN	Carbamidomethylation; Sodium adduct; Oxidation (M)	C3:Carbamidomethylation:1000.00;E11:Sodium adduct:10.11;M12:Oxidation (M):1000.00	FALSE
SHC(+57.02)IAEVENDEM(+15.99)PADLPSLAADFVESK	105.07	2989.33	27	-3.3	997.452	3	26.1445	51700000	1220000000	6908	20210526_HS_PLUG-3.raw	55	A0A0C4DGB6|A0A0C4DGB6_HUMAN;P02768|ALBU_HUMAN;C9JKR2|C9JKR2_HUMAN;D6RHD5|D6RHD5_HUMAN;B7WNR0|B7WNR0_HUMAN;H0YA55|H0YA55_HUMAN	Carbamidomethylation; Oxidation (M)	C3:Carbamidomethylation:1000.00	FALSE
SIAQYWLGC(+57.02)PAPGHL	37.78	1668.81	15	7.6	835.421	2	25.1775	61200	675000	6389	20210526_HS_PLUG-1.raw	1	P04004|VTNC_HUMAN	Carbamidomethylation	C9:Carbamidomethylation:1000.00	FALSE
SIEVFGQFN(+0.98)GK	35.45	1225.6	11	-4.6	613.803	2	20.2558	70800	720000	4170	20210602_HS_50ng_PLUG-11.raw	1	P02748|CO9_HUMAN	Deamidation (NQ)	N9:Deamidation (NQ):22.85	FALSE
SLDFTELDVAAEK	63.33	1436.7	13	0.9	719.36	2	22.0873	2040000	24500000	4755	20210602_HS_50ng_PLUG-5.raw	15	P01019|ANGT_HUMAN			FALSE
SLDLDSIIAEVK	48.85	1301.71	12	-1.7	651.863	2	26.2053	609000	7410000	6733	20210526_HS_PLUG-2.raw	3	#CONTAM#cont|000132|;#CONTAM#cont|000135|;#CONTAM#cont|000134|;P04264|K2C1_HUMAN			FALSE
SLGEC(+57.02)C(+57.02)DVEDSTTC(+57.02)FNAK	57.85	2091.82	18	-0.7	1046.92	2	16.7978	375000	4470000	3466	20210526_HS_PLUG-3.raw	4	P02774|VTDB_HUMAN;D6RF35|D6RF35_HUMAN	Carbamidomethylation; Carbamidomethylation; Carbamidomethylation	C5:Carbamidomethylation:1000.00;C6:Carbamidomethylation:1000.00;C14:Carbamidomethylation:1000.00	FALSE
SLGNVIM(+15.99)VC(+57.02)R	33.99	1163.58	10	3.9	582.801	2	17.227	25400	453000	3596	20210526_HS_PLUG-3.raw	2	A0A0D9SG88|A0A0D9SG88_HUMAN;P08603|CFAH_HUMAN;Q5TFM2|Q5TFM2_HUMAN	Oxidation (M); Carbamidomethylation	C9:Carbamidomethylation:1000.00	FALSE
SLHTLFGDK	63.38	1016.53	9	-3.3	509.27	2	15.5607	185000000	1370000000	3230	20210602_HS_50ng_PLUG-5.raw	112	A0A0C4DGB6|A0A0C4DGB6_HUMAN;A0A087WWT3|A0A087WWT3_HUMAN;P02768|ALBU_HUMAN;H7C013|H7C013_HUMAN			FALSE
SLNNQFASFIDK	61.65	1382.68	12	-0.5	692.351	2	22.0342	1500000	16900000	5380	20210526_HS_PLUG-2.raw	15	#CONTAM#cont|000132|;#CONTAM#cont|000135|;#CONTAM#cont|000134|;P04264|K2C1_HUMAN			FALSE
SLPVSDSVLSGFEQR	52.72	1619.82	15	3.6	810.921	2	22.91	225000	3360000	5695	20210526_HS_PLUG-2.raw	3				FALSE
SLWDFLK	35.12	907.48	7	0.5	454.75	2	25.8465	97500	899000	6619	20210526_HS_PLUG-2.raw	3	P04114|APOB_HUMAN			FALSE
SNLDED(+21.98)IIAEENIVSR	67.47	1837.87	16	1	613.633	3	22.2158	494000	6870000	5442	20210526_HS_PLUG-2.raw	3	P01024|CO3_HUMAN	Sodium adduct	D6:Sodium adduct:24.44	FALSE
SNLDEDIIAEENIVSR	74.89	1815.88	16	1.7	908.951	2	22.1352	13800000	103000000	4779	20210602_HS_50ng_PLUG-5.raw	24	P01024|CO3_HUMAN			FALSE
SPDVIN(+0.98)GSPISQK	61.47	1341.68	13	1.3	671.847	2	14.325	1290000	4880000	2653	20210602_HS_50ng_PLUG-15.raw	9	A0A0D9SG88|A0A0D9SG88_HUMAN;P08603|CFAH_HUMAN;Q5TFM2|Q5TFM2_HUMAN	Deamidation (NQ)	N6:Deamidation (NQ):22.09	FALSE
SPEQQE(+21.98)TVLDGNLIIR	30.6	1832.92	16	-7.6	611.98	3	22.2395	105000	1090000	5324	20210526_HS_PLUG-3.raw	1	Q14624|ITIH4_HUMAN;B7ZKJ8|B7ZKJ8_HUMAN;H7C0L5|H7C0L5_HUMAN	Sodium adduct	E6:Sodium adduct:0.00	FALSE
SPEQQETVLDGNLIIR	69.64	1810.94	16	2.6	906.484	2	22.144	983000	13700000	5365	20210526_HS_PLUG-1.raw	8	Q14624|ITIH4_HUMAN;B7ZKJ8|B7ZKJ8_HUMAN;H7C0L5|H7C0L5_HUMAN			FALSE
SPPEISHGVVAHM(+15.99)SDSYQ(+0.98)YGEEVTYK	37.42	2926.3	26	7.6	732.59	4	18.5444	33400	679000	4070	20210526_HS_PLUG-1.raw	1	P08603|CFAH_HUMAN	Oxidation (M); Deamidation (NQ)		FALSE
SPPEISHGVVAHM(+15.99)SDSYQYGEEVTYK	40.46	2925.31	26	1.2	732.339	4	18.5509	43800	790000	4030	20210526_HS_PLUG-3.raw	1	P08603|CFAH_HUMAN	Oxidation (M)		FALSE
SPQELLC(+57.02)GASLISDR	49.76	1644.81	15	0.3	823.418	2	22.2521	45300	1030000	5429	20210526_HS_PLUG-1.raw	1	P00734|THRB_HUMAN;E9PIT3|E9PIT3_HUMAN	Carbamidomethylation	C7:Carbamidomethylation:1000.00	FALSE
SPVGVQ(+0.98)PILNEHTFC(+57.02)AGM(+15.99)SK	34.52	2188.03	20	8.6	730.359	3	20.9711	721000	2720000	5202	20210526_HS_PLUG-3.raw	1	P00738|HPT_HUMAN;J3QLC9|J3QLC9_HUMAN;A0A087WU08|A0A087WU08_HUMAN;H0Y300|H0Y300_HUMAN;A0A0C4DGL8|A0A0C4DGL8_HUMAN;J3QR68|J3QR68_HUMAN	Deamidation (NQ); Carbamidomethylation; Oxidation (M)	Q6:Deamidation (NQ):4.73;C15:Carbamidomethylation:1000.00;M18:Oxidation (M):1000.00	FALSE
SPVGVQPILN(+0.98)EHTFC(+57.02)AGM(+15.99)SK	60.14	2188.03	20	2.8	730.355	3	20.7803			4821	20210526_HS_PLUG-3.raw	2	P00738|HPT_HUMAN;J3QLC9|J3QLC9_HUMAN;A0A087WU08|A0A087WU08_HUMAN;H0Y300|H0Y300_HUMAN;A0A0C4DGL8|A0A0C4DGL8_HUMAN;J3QR68|J3QR68_HUMAN	Deamidation (NQ); Carbamidomethylation; Oxidation (M)	N10:Deamidation (NQ):42.68;C15:Carbamidomethylation:1000.00;M18:Oxidation (M):1000.00	FALSE
SPVGVQPILNE(+21.98)HTFC(+57.02)AGM(+15.99)SK	29.02	2209.03	20	1.1	737.353	3	20.8551	36400	662000	4859	20210526_HS_PLUG-3.raw	2	P00738|HPT_HUMAN;J3QLC9|J3QLC9_HUMAN;A0A087WU08|A0A087WU08_HUMAN;H0Y300|H0Y300_HUMAN;A0A0C4DGL8|A0A0C4DGL8_HUMAN;J3QR68|J3QR68_HUMAN	Sodium adduct; Carbamidomethylation; Oxidation (M)	E11:Sodium adduct:3.68;C15:Carbamidomethylation:1000.00;M18:Oxidation (M):1000.00	FALSE
SPVGVQPILNEHTFC(+57.02)AGM(+15.99)SK	69.65	2187.05	20	-5.1	730.022	3	20.85	14400000	148000000	4956	20210526_HS_PLUG-2.raw	18	P00738|HPT_HUMAN;J3QLC9|J3QLC9_HUMAN;A0A087WU08|A0A087WU08_HUMAN;H0Y300|H0Y300_HUMAN;A0A0C4DGL8|A0A0C4DGL8_HUMAN;J3QR68|J3QR68_HUMAN	Carbamidomethylation; Oxidation (M)	C15:Carbamidomethylation:1000.00	FALSE
SSALDM(+15.99)ENFR	47.3	1184.51	10	-1	593.263	2	8.1499	682000	1780000	1583	20210602_HS_50ng_PLUG-12.raw	3	Q5T985|Q5T985_HUMAN;Q5T987|Q5T987_HUMAN;P19823|ITIH2_HUMAN	Oxidation (M)		FALSE
SSGSLLN(+0.98)NAIK	44.93	1103.58	11	1.1	552.799	2	13.5923	765000	3840000	2528	20210602_HS_50ng_PLUG-11.raw	11	P01023|A2MG_HUMAN;P20742|PZP_HUMAN	Deamidation (NQ)	N7:Deamidation (NQ):14.02	FALSE
SSGSLLNN(+0.98)AIK	41.31	1103.58	11	2.1	552.8	2	15.8801	413000	2690000	3005	20210602_HS_50ng_PLUG-9.raw	5	P01023|A2MG_HUMAN;P20742|PZP_HUMAN	Deamidation (NQ)	N8:Deamidation (NQ):11.06	FALSE
SSGSLLNNAIK	60.47	1102.6	11	7.5	552.311	2	15.4058	10200000	38100000	2896	20210602_HS_50ng_PLUG-12.raw	11	P01023|A2MG_HUMAN;P20742|PZP_HUMAN			FALSE
SSIDIEN(+0.98)GFISESQYTYALK	44.64	2265.07	20	2	1133.55	2	24.3898	107000	1530000	6188	20210526_HS_PLUG-2.raw	2	P08603|CFAH_HUMAN	Deamidation (NQ)	N7:Deamidation (NQ):20.76	FALSE
SSLSVPYVIVPLK	59.6	1400.83	13	-2.7	701.419	2	25.6991	5500000	65800000	5626	20210602_HS_50ng_PLUG-5.raw	20	P01024|CO3_HUMAN			FALSE
SSNLIILEEHLK	54.12	1394.78	12	0.7	465.935	3	21.7779	400000	4100000	5286	20210526_HS_PLUG-2.raw	3	P08603|CFAH_HUMAN			FALSE
SSSNEEVM(+15.99)FLTVQVK	63.72	1712.83	15	7.7	857.432	2	21.6268	2680000	43200000	5233	20210526_HS_PLUG-2.raw	23	P01023|A2MG_HUMAN;F8W7L3|F8W7L3_HUMAN	Oxidation (M)		FALSE
STSESTAALGC(+57.02)LVK	60.98	1422.7	14	2.8	712.361	2	18.401	9350000	85800000	3743	20210602_HS_50ng_PLUG-10.raw	55	P01859|IGHG2_HUMAN;A0A286YEY4|A0A286YEY4_HUMAN	Carbamidomethylation	C11:Carbamidomethylation:1000.00	FALSE
STSGGTAALGC(+57.02)LVK	67.28	1320.67	14	1.9	661.344	2	18.8995	32800000	310000000	3804	20210602_HS_50ng_PLUG-5.raw	72	P01857|IGHG1_HUMAN;A0A0A0MS08|A0A0A0MS08_HUMAN;A0A0A0MS07|A0A0A0MS07_HUMAN	Carbamidomethylation	C11:Carbamidomethylation:1000.00	FALSE
SVIPSD(+21.98)GPSVAC(+57.02)VK	33.38	1436.69	14	-5.2	719.354	2	17.5216	47800	770000	3768	20210526_HS_PLUG-2.raw	2	F8WCI6|F8WCI6_HUMAN;P02787|TRFE_HUMAN;F8WEK9|F8WEK9_HUMAN;C9JB55|C9JB55_HUMAN	Sodium adduct; Carbamidomethylation	D6:Sodium adduct:3.46;C12:Carbamidomethylation:1000.00	FALSE
SVIPSDGPSVAC(+57.02)VK	73.65	1414.71	14	-4.4	708.361	2	17.5479	25600000	286000000	3370	20210602_HS_50ng_PLUG-15.raw	47	F8WCI6|F8WCI6_HUMAN;P02787|TRFE_HUMAN;F8WEK9|F8WEK9_HUMAN;C9JB55|C9JB55_HUMAN	Carbamidomethylation	C12:Carbamidomethylation:1000.00	FALSE
SVLGQLGITK	48.37	1014.61	10	-1.6	508.31	2	19.7228	66800000	533000000	4027	20210602_HS_50ng_PLUG-12.raw	14				FALSE
SVSDGIAALDLNAVANK	56.71	1656.87	17	-3.2	829.439	2	22.4443	529000	7630000	4698	20210602_HS_50ng_PLUG-14.raw	5	P04114|APOB_HUMAN			FALSE
SVSLPSLDPASAK	49.62	1270.68	13	-0.4	636.346	2	19.7264	1290000	13200000	4067	20210602_HS_50ng_PLUG-5.raw	15	A8MUN2|A8MUN2_HUMAN;P04114|APOB_HUMAN			FALSE
SYSC(+57.02)QVTHEGSTVEK	53.26	1710.75	15	-1.7	571.259	3	5.343	4690000	14800000	967	20210526_HS_PLUG-2.raw	8		Carbamidomethylation	C4:Carbamidomethylation:1000.00	FALSE
SYTVAIAGYALAQM(+15.99)GR	62.78	1686.84	16	3.2	844.433	2	22.102	784000	10800000	5391	20210526_HS_PLUG-2.raw	4	M0R0Q9|M0R0Q9_HUMAN;P01024|CO3_HUMAN	Oxidation (M)		FALSE
TAAENDFVTLK	57.67	1207.61	11	1.9	604.813	2	16.9502	1130000	5490000	3226	20210602_HS_50ng_PLUG-8.raw	15	P35908|K22E_HUMAN			FALSE
TAGWNIPM(+15.99)GLLYNK	58.81	1592.8	14	2.6	797.41	2	24.3053	17900000	135000000	5324	20210602_HS_50ng_PLUG-5.raw	25	H7C5E8|H7C5E8_HUMAN;P02787|TRFE_HUMAN	Oxidation (M)		FALSE
TC(+57.02)VADESAEN(+0.98)C(+57.02)DK	56.24	1498.56	13	9.7	750.292	2	4.411	325000	1140000	734	20210602_HS_50ng_PLUG-9.raw	8	A0A0C4DGB6|A0A0C4DGB6_HUMAN;A0A087WWT3|A0A087WWT3_HUMAN;P02768|ALBU_HUMAN;H7C013|H7C013_HUMAN	Carbamidomethylation; Deamidation (NQ); Carbamidomethylation	C2:Carbamidomethylation:1000.00;C11:Carbamidomethylation:1000.00	FALSE
TC(+57.02)VADESAENC(+57.02)DK	91.42	1497.57	13	0.3	749.793	2	4.9366	10800000	25500000	730	20210602_HS_50ng_PLUG-12.raw	89	A0A0C4DGB6|A0A0C4DGB6_HUMAN;A0A087WWT3|A0A087WWT3_HUMAN;P02768|ALBU_HUMAN;H7C013|H7C013_HUMAN	Carbamidomethylation; Carbamidomethylation	C2:Carbamidomethylation:1000.00;C11:Carbamidomethylation:1000.00	FALSE
TEDTIFLR	53.6	993.513	8	-1.4	497.763	2	17.3772	17400000	79200000	3349	20210602_HS_50ng_PLUG-5.raw	19	P02763|A1AG1_HUMAN			FALSE
TEGDGVYTLNDK	57.89	1310.6	12	-4.1	656.304	2	7.957	9580000	21400000	1500	20210602_HS_50ng_PLUG-12.raw	20	P00738|HPT_HUMAN;J3QLC9|J3QLC9_HUMAN;H0Y300|H0Y300_HUMAN;A0A0C4DGL8|A0A0C4DGL8_HUMAN;J3KRH2|J3KRH2_HUMAN;J3QR68|J3QR68_HUMAN			FALSE
TEGDGVYTLNNEK	55.34	1438.66	13	-0.3	720.336	2	7.8872	1430000	7790000	1508	20210602_HS_50ng_PLUG-9.raw	5	P00738|HPT_HUMAN;H3BMJ7|H3BMJ7_HUMAN;J3QLC9|J3QLC9_HUMAN;H3BS21|H3BS21_HUMAN;J3KSV1|J3KSV1_HUMAN;J3QQI8|J3QQI8_HUMAN;J3KRH2|J3KRH2_HUMAN			FALSE
TEHGSEM(+15.99)LFFGNAIEGK	36.94	1881.86	17	7.6	628.3	3	20.9515			4941	20210526_HS_PLUG-1.raw	1	P04114|APOB_HUMAN	Oxidation (M)		FALSE
TEHPFTVEEFVLPK	72.3	1671.85	14	2.7	558.295	3	24.1668	9760000	63100000	6106	20210526_HS_PLUG-2.raw	18	P01023|A2MG_HUMAN			FALSE
TELRPGETLNVNFLLR	58.4	1871.03	16	2	624.686	3	25.5109	126000	1570000	6472	20210526_HS_PLUG-1.raw	2	P01024|CO3_HUMAN			FALSE
TEQWSTLPPETK	36.35	1415.69	12	3.4	708.859	2	16.6914	37700	301000	3458	20210526_HS_PLUG-1.raw	1				FALSE
TEVIPPLIENR	61.68	1279.71	11	0.5	640.864	2	20.7535	501000	3160000	4349	20210602_HS_50ng_PLUG-5.raw	1	P04114|APOB_HUMAN			FALSE
TEVNVLPGAK	50.05	1026.57	10	0	514.293	2	13.166	1700000	3900000	2442	20210602_HS_50ng_PLUG-10.raw	10	Q5T985|Q5T985_HUMAN;Q5T987|Q5T987_HUMAN;P19823|ITIH2_HUMAN			FALSE
TEVSSNHVLIYLDK	76.43	1616.84	14	3.8	809.434	2	20.0475	7230000	68600000	4659	20210526_HS_PLUG-2.raw	20	P01023|A2MG_HUMAN			FALSE
TFTC(+57.02)TAAYPESK	66.18	1374.61	12	-0.9	688.313	2	11.9034	2450000	5200000	2166	20210602_HS_50ng_PLUG-15.raw	5	P01876|IGHA1_HUMAN;A0A286YEY1|A0A286YEY1_HUMAN	Carbamidomethylation	C4:Carbamidomethylation:1000.00	FALSE
TFYEPGEEITYSC(+57.02)KPGYVSR	42.66	2382.08	20	0.4	795.039	3	20.2302	82500	1170000	4686	20210526_HS_PLUG-1.raw	1	J3QRN2|J3QRN2_HUMAN;P02749|APOH_HUMAN	Carbamidomethylation	C13:Carbamidomethylation:1000.00	FALSE
TGESVEFVC(+57.02)K	28.01	1154.53	10	-0.5	578.271	2	12.1215	39200	136000	2235	20210602_HS_50ng_PLUG-4.raw	1	P08603|CFAH_HUMAN	Carbamidomethylation	C9:Carbamidomethylation:1000.00	FALSE
TGLLLLSDPDK	47.19	1170.65	11	1	586.335	2	21.231	54400	1040000	4986	20210526_HS_PLUG-3.raw	4	Q14624|ITIH4_HUMAN;B7ZKJ8|B7ZKJ8_HUMAN;H7C0L5|H7C0L5_HUMAN			FALSE
TGLQEVEVK	51.58	1001.54	9	1	501.777	2	10.1101	13100000	20800000	1868	20210602_HS_50ng_PLUG-4.raw	27	P01024|CO3_HUMAN			FALSE
THLAPYSDELR	58.85	1300.64	11	-1.8	434.555	3	14.8347	6690000	17500000	2954	20210526_HS_PLUG-2.raw	19	F8W696|F8W696_HUMAN;P02647|APOA1_HUMAN			FALSE
THLPEVFLSK	51.54	1169.64	10	4.1	585.834	2	19.8165	539000	5190000	4542	20210526_HS_PLUG-1.raw	7	P02774|VTDB_HUMAN;D6RF35|D6RF35_HUMAN			FALSE
THTC(+57.02)PPC(+57.02)PAPELLGGPSVFLFPPKPK	52.78	2843.45	26	3	711.875	4	27.4949	72400	454000	7066	20210526_HS_PLUG-1.raw	1	P01857|IGHG1_HUMAN;A0A0A0MS08|A0A0A0MS08_HUMAN;A0A0A0MS07|A0A0A0MS07_HUMAN	Carbamidomethylation; Carbamidomethylation	C4:Carbamidomethylation:1000.00;C7:Carbamidomethylation:1000.00	FALSE
TILDDLR	34.78	844.465	7	-0.5	423.241	2	17.6844	1740000	8880000	3815	20210526_HS_PLUG-2.raw	15	#CONTAM#cont|000108|;Q5T985|Q5T985_HUMAN;P19823|ITIH2_HUMAN			FALSE
TIYTPGSTVLYR	60.98	1369.72	12	-0.8	685.872	2	19.4762	6360000	48100000	4457	20210526_HS_PLUG-2.raw	17	P01024|CO3_HUMAN			FALSE
TLADLTLLDSPIK	65.75	1398.8	13	-4.8	700.405	2	25.3012	805000	7590000	6436	20210526_HS_PLUG-2.raw	6	P04114|APOB_HUMAN			FALSE
TLEAQLTPR	52.22	1027.57	9	1.5	514.791	2	13.0322	687000	1150000	2423	20210602_HS_50ng_PLUG-9.raw	3	P05546|HEP2_HUMAN			FALSE
TLLSNLEEAK	56.67	1116.6	10	3.1	559.31	2	18.985	1750000	16800000	3786	20210602_HS_50ng_PLUG-8.raw	15	H0YLK8|H0YLK8_HUMAN;P10909|CLUS_HUMAN;E7ETB4|E7ETB4_HUMAN;E7ERK6|E7ERK6_HUMAN			FALSE
TLNQPDSQLQLTTGNGLFLSEGLK	48.17	2573.33	24	0.3	858.789	3	26.1514	29900	728000	6694	20210526_HS_PLUG-1.raw	1				FALSE
TLQGIPQM(+15.99)IGEVIR	45.51	1569.85	14	4.5	785.941	2	23.3971	608000	5890000	5851	20210526_HS_PLUG-2.raw	3	P04114|APOB_HUMAN	Oxidation (M)		FALSE
TM(+15.99)QALPYSTVGNSN(+0.98)NYLHLSVLR	64.03	2594.28	23	-0.6	865.77	3	24.578	104000	1490000	6249	20210526_HS_PLUG-2.raw	2	P01024|CO3_HUMAN	Oxidation (M); Deamidation (NQ)	M2:Oxidation (M):1000.00;N14:Deamidation (NQ):14.04	FALSE
TM(+15.99)QALPYSTVGNSNN(+0.98)YLHLSVLR	42.39	2594.28	23	3.2	865.773	3	24.6283			6161	20210526_HS_PLUG-3.raw	1	P01024|CO3_HUMAN	Oxidation (M); Deamidation (NQ)	M2:Oxidation (M):1000.00;N15:Deamidation (NQ):0.00	FALSE
TM(+15.99)QALPYSTVGNSNNYLHLSVLR	63.61	2593.3	23	-0.5	865.442	3	24.8052	252000	2830000	6204	20210526_HS_PLUG-3.raw	1	P01024|CO3_HUMAN	Oxidation (M)		FALSE
TNAENEFVTIK	56.27	1264.63	11	-0.3	633.322	2	16.7528	2150000	19700000	3216	20210602_HS_50ng_PLUG-12.raw	14	#CONTAM#cont|000132|;#CONTAM#cont|000135|;#CONTAM#cont|000134|;P04264|K2C1_HUMAN			FALSE
TNFDNDIALVR	59.02	1276.64	11	1.4	639.329	2	19.7016	165000	1650000	4039	20210602_HS_50ng_PLUG-12.raw	3				FALSE
TNLESILSYPK	59.34	1263.67	11	0.5	632.846	2	22.3761	6700000	39400000	5483	20210526_HS_PLUG-2.raw	15	H9KV48|H9KV48_HUMAN;P05155|IC1_HUMAN;E9PGN7|E9PGN7_HUMAN			FALSE
TNQVNSGGVLLR	40.83	1256.68	12	1.7	629.35	2	14.295	70300	355000	2641	20210602_HS_50ng_PLUG-13.raw	2	P02747|C1QC_HUMAN			FALSE
TPE(+21.98)VTC(+57.02)VVVDVSHEDPEVK	40.92	2160	19	4.8	721.014	3	20.9391	157000	1880000	4933	20210526_HS_PLUG-1.raw	1	P01857|IGHG1_HUMAN;A0A0A0MS08|A0A0A0MS08_HUMAN;A0A0A0MS07|A0A0A0MS07_HUMAN	Sodium adduct; Carbamidomethylation	E3:Sodium adduct:0.00;C6:Carbamidomethylation:1000.00	FALSE
TPEVTC(+57.02)VVVD(+21.98)VSHEDPEVK	41.54	2160	19	4.3	721.014	3	20.9793	222000	2650000	4883	20210526_HS_PLUG-3.raw	2	P01857|IGHG1_HUMAN;A0A0A0MS08|A0A0A0MS08_HUMAN;A0A0A0MS07|A0A0A0MS07_HUMAN	Carbamidomethylation; Sodium adduct	C6:Carbamidomethylation:1000.00;D10:Sodium adduct:42.68	FALSE
TPEVTC(+57.02)VVVDVSHEDPEVK	81.53	2138.02	19	-2.9	713.679	3	20.9956	57900000	482000000	4328	20210602_HS_50ng_PLUG-15.raw	65	P01857|IGHG1_HUMAN;A0A0A0MS08|A0A0A0MS08_HUMAN;A0A0A0MS07|A0A0A0MS07_HUMAN	Carbamidomethylation	C6:Carbamidomethylation:1000.00	FALSE
TPEVTC(+57.02)VVVDVSHEDPEVQFK	81.32	2413.15	21	2.4	805.395	3	23.4121	1020000	12800000	5875	20210526_HS_PLUG-2.raw	3		Carbamidomethylation	C6:Carbamidomethylation:1000.00	FALSE
TPLTATLSK	69.88	930.539	9	-1.1	466.276	2	11.2923	39900000	71600000	2093	20210602_HS_50ng_PLUG-8.raw	31	P01876|IGHA1_HUMAN;A0A286YEY1|A0A286YEY1_HUMAN			FALSE
TQFNNNEYSQDLDAYNTK	58.07	2163.93	18	2.1	1082.98	2	18.0305	440000	4890000	3896	20210526_HS_PLUG-1.raw	5	P04114|APOB_HUMAN			FALSE
TSDQIHFFFAK	51.98	1339.66	11	0.2	447.561	3	22.1759	538000	5460000	5378	20210526_HS_PLUG-1.raw	3	P01008|ANT3_HUMAN;Q8TCE1|Q8TCE1_HUMAN			FALSE
TSESGELHGLTTEEEFVEGIYK	68.74	2454.14	22	0.6	819.059	3	24.2088	5180000	49600000	6134	20210526_HS_PLUG-2.raw	3	P02766|TTHY_HUMAN;A0A087WT59|A0A087WT59_HUMAN			FALSE
TSNFNAAISLK	40.81	1164.61	11	-1.9	583.313	2	18.2113	145000	1390000	3575	20210602_HS_50ng_PLUG-13.raw	3	P02748|CO9_HUMAN			FALSE
TSSFALNLPTLPEVK	54.71	1615.88	15	5.3	808.956	2	26.4905	761000	7710000	6791	20210526_HS_PLUG-1.raw	3	P04114|APOB_HUMAN			FALSE
TTNIQGINLLFSSR	76.59	1562.84	14	2.7	782.43	2	24.8843	2250000	20100000	5365	20210602_HS_50ng_PLUG-10.raw	13				FALSE
TTPPM(+15.99)LDSD(+21.98)GSFFLYSK	31.51	1942.86	17	-2.9	648.629	3	23.6926	259000	2220000	5883	20210526_HS_PLUG-3.raw	2	P01859|IGHG2_HUMAN;A0A286YEY4|A0A286YEY4_HUMAN	Oxidation (M); Sodium adduct	M5:Oxidation (M):1000.00;D9:Sodium adduct:14.04	FALSE
TTPPM(+15.99)LDSDGSFFLYSK	46.91	1920.88	17	-1.4	961.45	2	23.6926	22500000	210000000	5988	20210526_HS_PLUG-3.raw	13	P01859|IGHG2_HUMAN;A0A286YEY4|A0A286YEY4_HUMAN	Oxidation (M)		FALSE
TTPPVLD(+21.98)SDGSFFLYSK	38.14	1894.9	17	1.9	948.461	2	24.9856	249000	2150000	6252	20210526_HS_PLUG-3.raw	2	P01857|IGHG1_HUMAN;A0A0A0MS08|A0A0A0MS08_HUMAN;A0A0A0MS07|A0A0A0MS07_HUMAN	Sodium adduct	D7:Sodium adduct:0.00	FALSE
TTPPVLDSD(+21.98)GSFFLYSK	56.62	1894.9	17	-0.3	632.642	3	24.9287	1690000	13900000	6329	20210526_HS_PLUG-2.raw	4	P01857|IGHG1_HUMAN;A0A0A0MS08|A0A0A0MS08_HUMAN;A0A0A0MS07|A0A0A0MS07_HUMAN	Sodium adduct	D9:Sodium adduct:0.00	FALSE
TTPPVLDSDGSFFLYSK	63.23	1872.91	17	3.5	937.472	2	24.6575	52400000	202000000	6414	20210526_HS_PLUG-2.raw	48	P01857|IGHG1_HUMAN;A0A0A0MS08|A0A0A0MS08_HUMAN;A0A0A0MS07|A0A0A0MS07_HUMAN			FALSE
TTPPVLDSDGSFFLYSR	54.5	1900.92	17	2.7	951.474	2	25.241	1670000	14300000	6393	20210526_HS_PLUG-1.raw	6				FALSE
TVAAC(+57.02)NLPIVR	54.98	1212.66	11	4.3	607.342	2	18.5151	3910000	32400000	3635	20210602_HS_50ng_PLUG-15.raw	15	P02760|AMBP_HUMAN	Carbamidomethylation	C5:Carbamidomethylation:1000.00	FALSE
TVAAPSVFIFPPSD(+21.98)EQLK	45.99	1967	18	-1.3	656.676	3	26.1891	6780000	24900000	6667	20210526_HS_PLUG-2.raw	11	A0A5H1ZRQ3|A0A5H1ZRQ3_HUMAN;P01834|IGKC_HUMAN	Sodium adduct	D14:Sodium adduct:17.01	FALSE
TVAAPSVFIFPPSDE(+21.98)QLK	40.73	1967	18	1.4	656.675	3	26.17	207000	675000	5452	20210602_HS_50ng_PLUG-15.raw	1	A0A5H1ZRQ3|A0A5H1ZRQ3_HUMAN;P01834|IGKC_HUMAN	Sodium adduct	E15:Sodium adduct:0.00	FALSE
TVAAPSVFIFPPSDEQLK	67.25	1945.02	18	-3.7	649.345	3	26.0635	203000000	2010000000	5779	20210602_HS_50ng_PLUG-5.raw	123	A0A5H1ZRQ3|A0A5H1ZRQ3_HUMAN;P01834|IGKC_HUMAN			FALSE
TVGSDTFYSFK	39.45	1250.58	11	8.2	626.303	2	18.906	2360000	27900000	3766	20210602_HS_50ng_PLUG-9.raw	8	P01042|KNG1_HUMAN			FALSE
TVM(+15.99)VNIE(+21.98)NPEGIPVK	42.18	1676.84	15	5.2	559.96	3	20.5506	204000	2300000	4782	20210526_HS_PLUG-1.raw	3	P01024|CO3_HUMAN	Oxidation (M); Sodium adduct	M3:Oxidation (M):1000.00;E7:Sodium adduct:24.24	FALSE
TVM(+15.99)VNIENPEGIPVK	66.05	1654.86	15	4	828.441	2	20.4889	18000000	147000000	4250	20210602_HS_50ng_PLUG-12.raw	32	P01024|CO3_HUMAN	Oxidation (M)		FALSE
TVQAVLTVPK	46.49	1054.64	10	1.1	528.329	2	17.7367	435000	3390000	3844	20210526_HS_PLUG-2.raw	10	P36955|PEDF_HUMAN			FALSE
TWNAVLLR	40.33	971.555	8	0.8	486.785	2	22.705	1410000	5110000	4875	20210602_HS_50ng_PLUG-12.raw	5				FALSE
TWYPEVPK	40.85	1018.51	8	-0.2	510.263	2	18.6464	491000	7740000	3712	20210602_HS_50ng_PLUG-6.raw	18	P04003|C4BPA_HUMAN			FALSE
TYE(+21.98)TTLEK	37.99	1005.46	8	-2.9	503.737	2	5.9629	13900000	17600000	1042	20210602_HS_50ng_PLUG-6.raw	9	A0A0C4DGB6|A0A0C4DGB6_HUMAN;P02768|ALBU_HUMAN;C9JKR2|C9JKR2_HUMAN;D6RHD5|D6RHD5_HUMAN;B7WNR0|B7WNR0_HUMAN;H0YA55|H0YA55_HUMAN	Sodium adduct	E3:Sodium adduct:0.00	FALSE
TYETTLE(+21.98)K	40.61	1005.46	8	-5.5	503.736	2	6.0529	12900000	14800000	1039	20210602_HS_50ng_PLUG-5.raw	11	A0A0C4DGB6|A0A0C4DGB6_HUMAN;P02768|ALBU_HUMAN;C9JKR2|C9JKR2_HUMAN;D6RHD5|D6RHD5_HUMAN;B7WNR0|B7WNR0_HUMAN;H0YA55|H0YA55_HUMAN	Sodium adduct	E7:Sodium adduct:26.02	FALSE
TYETTLEK	51.32	983.481	8	-1.2	492.747	2	12.2634	333000000	1870000000	2037	20210602_HS_50ng_PLUG-12.raw	338	A0A0C4DGB6|A0A0C4DGB6_HUMAN;P02768|ALBU_HUMAN;C9JKR2|C9JKR2_HUMAN;D6RHD5|D6RHD5_HUMAN;B7WNR0|B7WNR0_HUMAN;H0YA55|H0YA55_HUMAN			FALSE
TYM(+15.99)LAFDVNDEK	60.51	1460.65	12	2	731.333	2	19.8606	2480000	21700000	4092	20210602_HS_50ng_PLUG-5.raw	14	P02763|A1AG1_HUMAN	Oxidation (M)		FALSE
VAEGTQVLELPFK	65.35	1429.78	13	1.7	715.902	2	23.6683	3790000	34100000	5950	20210526_HS_PLUG-2.raw	15	P01008|ANT3_HUMAN			FALSE
VATVSLPR	39.38	841.502	8	-1	421.758	2	14.0812	29500000	131000000	2850	20210602_HS_50ng_PLUG-8.raw	60	#CONTAM#cont|000144|;#CONTAM#cont|000142|;#CONTAM#cont|000023|;#CONTAM#cont|000143|;#CONTAM#cont|000141|;#CONTAM#cont|000040|;#CONTAM#cont|000032|			FALSE
VC(+57.02)PFAGILEN(+0.98)GAVR	63.36	1502.76	14	2.7	752.387	2	23.3373	667000	5060000	5027	20210602_HS_50ng_PLUG-8.raw	8	J3QLI0|J3QLI0_HUMAN;J3QRN2|J3QRN2_HUMAN;P02749|APOH_HUMAN	Carbamidomethylation; Deamidation (NQ)	C2:Carbamidomethylation:1000.00	FALSE
VC(+57.02)PFAGILENGAVR	38.92	1501.77	14	2.2	751.897	2	23.7392			5946	20210526_HS_PLUG-1.raw	1	J3QLI0|J3QLI0_HUMAN;J3QRN2|J3QRN2_HUMAN;P02749|APOH_HUMAN	Carbamidomethylation	C2:Carbamidomethylation:1000.00	FALSE
VDFTLSSER	45.21	1052.51	9	0.6	527.264	2	15.9614	8350000	30900000	2984	20210602_HS_50ng_PLUG-11.raw	20				FALSE
VDLLNQEIEFLK	64.23	1459.79	12	-1.1	730.905	2	26.0465	128000	1880000	6569	20210526_HS_PLUG-3.raw	3	P35908|K22E_HUMAN			FALSE
VDLSFSPSQSLPASHAHLR	63.36	2048.04	19	2.7	513.022	4	20.8152	1310000	17800000	4931	20210526_HS_PLUG-2.raw	5	P01023|A2MG_HUMAN			FALSE
VDNALQ(+0.98)SGNSQE(+21.98)SVTEQDSK	40.89	2157.93	20	0	720.316	3	7.38	545000	3480000	1430	20210602_HS_50ng_PLUG-12.raw	3	A0A5H1ZRQ3|A0A5H1ZRQ3_HUMAN;P01834|IGKC_HUMAN	Deamidation (NQ); Sodium adduct	Q6:Deamidation (NQ):12.33;E12:Sodium adduct:38.03	FALSE
VDNALQ(+0.98)SGNSQESVTEQDSKDSTYSLSSTLTLSK	53.52	3619.69	34	5.7	905.937	4	21.4219	23400	435000	5068	20210526_HS_PLUG-3.raw	1	A0A5H1ZRQ3|A0A5H1ZRQ3_HUMAN;P01834|IGKC_HUMAN	Deamidation (NQ)	Q6:Deamidation (NQ):0.00	FALSE
VDNALQSGN(+0.98)SQE(+21.98)SVTEQDSK	28.31	2157.93	20	-1	720.318	3	5.8755	256000	1180000	1151	20210526_HS_PLUG-1.raw	1	A0A5H1ZRQ3|A0A5H1ZRQ3_HUMAN;P01834|IGKC_HUMAN	Deamidation (NQ); Sodium adduct	N9:Deamidation (NQ):0.00;E12:Sodium adduct:11.59	FALSE
VDNALQSGN(+0.98)SQESVTEQDSK	44.25	2135.95	20	0.9	712.99	3	7.0873	164000	562000	1271	20210602_HS_50ng_PLUG-8.raw	2	A0A5H1ZRQ3|A0A5H1ZRQ3_HUMAN;P01834|IGKC_HUMAN	Deamidation (NQ)	N9:Deamidation (NQ):0.00	FALSE
VDNALQSGNSQ(+0.98)ESVTEQDSK	51.75	2135.95	20	1.7	712.99	3	7.009			1301	20210602_HS_50ng_PLUG-7.raw	1	A0A5H1ZRQ3|A0A5H1ZRQ3_HUMAN;P01834|IGKC_HUMAN	Deamidation (NQ)	Q11:Deamidation (NQ):0.00	FALSE
VDNALQSGNSQE(+21.98)SVTE(+21.98)QDSK	46.9	2178.93	20	-6.1	727.311	3	7.1243	1330000	17500000	1307	20210602_HS_50ng_PLUG-13.raw	8	A0A5H1ZRQ3|A0A5H1ZRQ3_HUMAN;P01834|IGKC_HUMAN	Sodium adduct; Sodium adduct	E12:Sodium adduct:47.92;E16:Sodium adduct:39.76	FALSE
VDNALQSGNSQE(+21.98)SVTEQDSK	70.79	2156.94	20	-5.8	719.984	3	7.07	45800000	227000000	1290	20210602_HS_50ng_PLUG-10.raw	31	A0A5H1ZRQ3|A0A5H1ZRQ3_HUMAN;P01834|IGKC_HUMAN	Sodium adduct	E12:Sodium adduct:33.06	FALSE
VDNALQSGNSQESVTEQDSK	94.93	2134.96	20	-3.8	1068.48	2	7.0559	78200000	456000000	1370	20210602_HS_50ng_PLUG-5.raw	64	A0A5H1ZRQ3|A0A5H1ZRQ3_HUMAN;P01834|IGKC_HUMAN			FALSE
VDNALQSGNSQESVTEQDSKDSTYSLSSTLTLSK	51.06	3618.7	34	0.3	905.687	4	21.4495	62900	1520000	5068	20210526_HS_PLUG-3.raw	3	A0A5H1ZRQ3|A0A5H1ZRQ3_HUMAN;P01834|IGKC_HUMAN			FALSE
VEDIPLAR	39.19	911.508	8	-0.6	456.761	2	13.821	213000	983000	2603	20210602_HS_50ng_PLUG-12.raw	3	P04114|APOB_HUMAN			FALSE
VELLHNPAFC(+57.02)SLATTK	70.07	1799.92	16	2.2	600.983	3	21.976	2750000	27400000	4724	20210602_HS_50ng_PLUG-5.raw	18	P01024|CO3_HUMAN	Carbamidomethylation	C10:Carbamidomethylation:1000.00	FALSE
VEYGFQVK	46.06	968.497	8	-0.9	485.255	2	15.6402	3350000	12300000	2928	20210602_HS_50ng_PLUG-10.raw	16				FALSE
VFAIPPSFASIFLTK	33.7	1636.92	15	1.7	819.473	2	31.6623	153000	535000	7859	20210526_HS_PLUG-1.raw	1	P01871|IGHM_HUMAN			FALSE
VFD(+21.98)EFKPLVEEPQNLIK	34.13	2066.07	17	1.9	689.701	3	27.1365	73400	309000	7000	20210526_HS_PLUG-2.raw	1	A0A0C4DGB6|A0A0C4DGB6_HUMAN;A0A087WWT3|A0A087WWT3_HUMAN;P02768|ALBU_HUMAN;C9JKR2|C9JKR2_HUMAN;D6RHD5|D6RHD5_HUMAN;B7WNR0|B7WNR0_HUMAN;H0YA55|H0YA55_HUMAN	Sodium adduct	D3:Sodium adduct:0.00	FALSE
VFDE(+21.98)FKPLVEEPQNLIK	40.75	2066.07	17	3.1	689.702	3	26.7403	173000	963000	7011	20210526_HS_PLUG-1.raw	1	A0A0C4DGB6|A0A0C4DGB6_HUMAN;A0A087WWT3|A0A087WWT3_HUMAN;P02768|ALBU_HUMAN;C9JKR2|C9JKR2_HUMAN;D6RHD5|D6RHD5_HUMAN;B7WNR0|B7WNR0_HUMAN;H0YA55|H0YA55_HUMAN	Sodium adduct	E4:Sodium adduct:22.09	FALSE
VFDEFKPLVE(+21.98)EPQNLIK	39.45	2066.07	17	1.1	1034.05	2	25.6214	755000	8030000	6534	20210526_HS_PLUG-2.raw	7	A0A0C4DGB6|A0A0C4DGB6_HUMAN;A0A087WWT3|A0A087WWT3_HUMAN;P02768|ALBU_HUMAN;C9JKR2|C9JKR2_HUMAN;D6RHD5|D6RHD5_HUMAN;B7WNR0|B7WNR0_HUMAN;H0YA55|H0YA55_HUMAN	Sodium adduct	E10:Sodium adduct:0.00	FALSE
VFDEFKPLVEE(+21.98)PQNLIK	63.93	2066.07	17	1.7	689.701	3	25.6214	4280000	37600000	6525	20210526_HS_PLUG-2.raw	5	A0A0C4DGB6|A0A0C4DGB6_HUMAN;A0A087WWT3|A0A087WWT3_HUMAN;P02768|ALBU_HUMAN;C9JKR2|C9JKR2_HUMAN;D6RHD5|D6RHD5_HUMAN;B7WNR0|B7WNR0_HUMAN;H0YA55|H0YA55_HUMAN	Sodium adduct	E11:Sodium adduct:23.10	FALSE
VFDEFKPLVEEPQ(+0.98)NLIK	52.89	2045.07	17	0.1	682.701	3	34.1558	48100000	226000000	8081	20210526_HS_PLUG-2.raw	25	A0A0C4DGB6|A0A0C4DGB6_HUMAN;A0A087WWT3|A0A087WWT3_HUMAN;P02768|ALBU_HUMAN;C9JKR2|C9JKR2_HUMAN;D6RHD5|D6RHD5_HUMAN;B7WNR0|B7WNR0_HUMAN;H0YA55|H0YA55_HUMAN	Deamidation (NQ)	Q13:Deamidation (NQ):11.06	FALSE
VFDEFKPLVEEPQN(+0.98)LIK	62.01	2045.07	17	-6.5	682.696	3	25.4417	15800000	27800000	6502	20210526_HS_PLUG-2.raw	13	A0A0C4DGB6|A0A0C4DGB6_HUMAN;A0A087WWT3|A0A087WWT3_HUMAN;P02768|ALBU_HUMAN;C9JKR2|C9JKR2_HUMAN;D6RHD5|D6RHD5_HUMAN;B7WNR0|B7WNR0_HUMAN;H0YA55|H0YA55_HUMAN	Deamidation (NQ)	N14:Deamidation (NQ):7.21	FALSE
VFDEFKPLVEEPQNLIK	77.13	2044.09	17	-7.5	682.365	3	25.6606	117000000	1060000000	5504	20210602_HS_50ng_PLUG-10.raw	127	A0A0C4DGB6|A0A0C4DGB6_HUMAN;A0A087WWT3|A0A087WWT3_HUMAN;P02768|ALBU_HUMAN;C9JKR2|C9JKR2_HUMAN;D6RHD5|D6RHD5_HUMAN;B7WNR0|B7WNR0_HUMAN;H0YA55|H0YA55_HUMAN			FALSE
VFQFLEK	36.33	909.496	7	2	455.758	2	19.6505	120000	1030000	4433	20210526_HS_PLUG-3.raw	2	P01031|CO5_HUMAN			FALSE
VFSLQWGEVK	44.97	1191.63	10	2.4	596.825	2	23.1214	31700	362000	5680	20210526_HS_PLUG-3.raw	1	G3XAM2|G3XAM2_HUMAN;A0A2R8Y3M9|A0A2R8Y3M9_HUMAN;E7ETH0|E7ETH0_HUMAN;P05156|CFAI_HUMAN			FALSE
VFSN(+0.98)GAD(+21.98)LSGVTEEAPLK	37.85	1855.88	18	3.8	928.955	2	21.0904	494000	6180000	5026	20210526_HS_PLUG-2.raw	5		Deamidation (NQ); Sodium adduct	N4:Deamidation (NQ):1000.00;D7:Sodium adduct:6.67	FALSE
VFSN(+0.98)GADLSGVTE(+21.98)EAPLK	39.55	1855.88	18	1.3	928.953	2	21.0934	694000	6270000	4930	20210526_HS_PLUG-3.raw	3		Deamidation (NQ); Sodium adduct	N4:Deamidation (NQ):1000.00;E13:Sodium adduct:0.00	FALSE
VFSN(+0.98)GADLSGVTEEAPLK	71.35	1833.9	18	-3.3	917.954	2	20.9789	105000000	1510000000	4508	20210602_HS_50ng_PLUG-5.raw	74		Deamidation (NQ)		FALSE
VFSNGAD(+21.98)LSGVTEEAPLK	34.17	1854.9	18	1.1	619.309	3	20.6782	67800	841000	4785	20210526_HS_PLUG-3.raw	1		Sodium adduct	D7:Sodium adduct:16.36	FALSE
VFSNGADLSGVTEEAPLK	76.39	1832.92	18	2.7	917.471	2	20.649	10800000	113000000	4866	20210526_HS_PLUG-2.raw	15				FALSE
VGAHAGEYGAEALER	47.67	1528.73	15	1	510.586	3	13.0024	165000	406000	2567	20210526_HS_PLUG-2.raw	1				FALSE
VGDTLNLNLR	59.74	1113.61	10	3.9	557.817	2	19.1901	9700000	80800000	3819	20210602_HS_50ng_PLUG-15.raw	16				FALSE
VGEYSLYIGR	55.36	1155.59	10	-0.4	578.803	2	18.9301	2710000	23700000	3800	20210602_HS_50ng_PLUG-5.raw	16	P02743|SAMP_HUMAN			FALSE
VGFYESDVM(+15.99)GR	43.55	1274.56	11	-1.3	638.287	2	14.2973	16900000	68700000	2667	20210602_HS_50ng_PLUG-12.raw	22	P01023|A2MG_HUMAN	Oxidation (M)		FALSE
VGYVSGWGR	57.55	979.487	9	-1.3	490.75	2	15.6105	18600000	84200000	2924	20210602_HS_50ng_PLUG-10.raw	45	P00738|HPT_HUMAN;J3QLC9|J3QLC9_HUMAN;H3BS21|H3BS21_HUMAN;A0A087WU08|A0A087WU08_HUMAN;H0Y300|H0Y300_HUMAN;A0A0C4DGL8|A0A0C4DGL8_HUMAN;J3QR68|J3QR68_HUMAN			FALSE
VHQYFNVELIQPGAVK	68.32	1840.98	16	1.6	614.672	3	23.4363	1660000	18300000	5866	20210526_HS_PLUG-2.raw	5	P01024|CO3_HUMAN;M0QYC8|M0QYC8_HUMAN			FALSE
VHTE(+21.98)C(+57.02)C(+57.02)HGD(+21.98)LLEC(+57.02)ADDR	57.31	2129.79	17	8	710.947	3	16.2501	14800000	74700000	3429	20210526_HS_PLUG-2.raw	11	A0A0C4DGB6|A0A0C4DGB6_HUMAN;P02768|ALBU_HUMAN;C9JKR2|C9JKR2_HUMAN;D6RHD5|D6RHD5_HUMAN;B7WNR0|B7WNR0_HUMAN;H0YA55|H0YA55_HUMAN	Sodium adduct; Carbamidomethylation; Carbamidomethylation; Sodium adduct; Carbamidomethylation	E4:Sodium adduct:25.00;C5:Carbamidomethylation:1000.00;C6:Carbamidomethylation:1000.00;D9:Sodium adduct:29.32;C13:Carbamidomethylation:1000.00	FALSE
VHTEC(+57.02)C(+57.02)HGDLLEC(+57.02)ADDR	88.88	2085.83	17	-1.6	696.286	3	13.8972	33700000	121000000	2771	20210526_HS_PLUG-2.raw	88	A0A0C4DGB6|A0A0C4DGB6_HUMAN;P02768|ALBU_HUMAN;C9JKR2|C9JKR2_HUMAN;D6RHD5|D6RHD5_HUMAN;B7WNR0|B7WNR0_HUMAN;H0YA55|H0YA55_HUMAN	Carbamidomethylation; Carbamidomethylation; Carbamidomethylation	C5:Carbamidomethylation:1000.00;C6:Carbamidomethylation:1000.00;C13:Carbamidomethylation:1000.00	FALSE
VHTEC(+57.02)C(+57.02)HGDLLEC(+57.02)ADDRADLAK	82.46	2584.11	22	-7.2	647.033	4	17.3645	9300000	107000000	3663	20210526_HS_PLUG-1.raw	10	A0A0C4DGB6|A0A0C4DGB6_HUMAN;P02768|ALBU_HUMAN;C9JKR2|C9JKR2_HUMAN;D6RHD5|D6RHD5_HUMAN;B7WNR0|B7WNR0_HUMAN;H0YA55|H0YA55_HUMAN	Carbamidomethylation; Carbamidomethylation; Carbamidomethylation	C5:Carbamidomethylation:1000.00;C6:Carbamidomethylation:1000.00;C13:Carbamidomethylation:1000.00	FALSE
VIGNM(+15.99)GQTM(+15.99)EQLTPELK	57.16	1919.93	17	3.7	960.981	2	17.9983	1750000	15300000	3915	20210526_HS_PLUG-2.raw	7	A8MUN2|A8MUN2_HUMAN;P04114|APOB_HUMAN	Oxidation (M); Oxidation (M)		FALSE
VIPAC(+57.02)LPSPNYVVADR	46.27	1769.91	16	3	885.97	2	22.2139	497000	6770000	5426	20210526_HS_PLUG-2.raw	5	P00747|PLMN_HUMAN	Carbamidomethylation	C5:Carbamidomethylation:1000.00	FALSE
VLGAFSDGLAHLDNLK	54.31	1668.88	16	5	557.307	3	24.0259	291000	3810000	6066	20210526_HS_PLUG-2.raw	3	F8W6P5|F8W6P5_HUMAN;P68871|HBB_HUMAN;A0A2R8Y7R2|A0A2R8Y7R2_HUMAN			FALSE
VLLDGVQNPR	49.68	1109.62	10	2.6	555.818	2	15.1567	21200000	117000000	2787	20210602_HS_50ng_PLUG-15.raw	46	P01024|CO3_HUMAN			FALSE
VLLDQLGTTISFER	51.84	1590.86	14	3.7	796.444	2	24.9101	148000	1960000	6307	20210526_HS_PLUG-1.raw	3	P04114|APOB_HUMAN			FALSE
VLQGLLSPIFK	42.16	1213.74	11	0.5	607.882	2	26.2688	250000	3060000	6661	20210526_HS_PLUG-3.raw	3				FALSE
VLSLAQEQVGGSPEK	72.47	1540.81	15	2.1	771.414	2	16.7609	7520000	66000000	3210	20210602_HS_50ng_PLUG-5.raw	16				FALSE
VM(+15.99)PIC(+57.02)LPSK	55.37	1059.55	9	-0.8	530.78	2	16.4788	44500000	408000000	3098	20210602_HS_50ng_PLUG-15.raw	39	P00738|HPT_HUMAN;J3QLC9|J3QLC9_HUMAN;H3BS21|H3BS21_HUMAN;A0A087WU08|A0A087WU08_HUMAN;H0Y300|H0Y300_HUMAN;A0A0C4DGL8|A0A0C4DGL8_HUMAN;J3QR68|J3QR68_HUMAN	Oxidation (M); Carbamidomethylation	C5:Carbamidomethylation:1000.00	FALSE
VM(+15.99)PIC(+57.02)LPSKDYAEVGR	47.35	1849.91	16	2.5	617.647	3	19.7276	1220000	15100000	4498	20210526_HS_PLUG-1.raw	8	P00738|HPT_HUMAN;J3QLC9|J3QLC9_HUMAN;H3BS21|H3BS21_HUMAN;A0A087WU08|A0A087WU08_HUMAN;H0Y300|H0Y300_HUMAN;A0A0C4DGL8|A0A0C4DGL8_HUMAN;J3QR68|J3QR68_HUMAN	Oxidation (M); Carbamidomethylation	C5:Carbamidomethylation:1000.00	FALSE
VNQNLVYESGSLNFSK	57.71	1797.89	16	3.8	899.959	2	20.4696	178000	2790000	4828	20210526_HS_PLUG-2.raw	3	P04114|APOB_HUMAN			FALSE
VNVDEVGGEALGR	55.76	1313.66	13	0.4	657.836	2	16.6585	4870000	40600000	3151	20210602_HS_50ng_PLUG-15.raw	15	F8W6P5|F8W6P5_HUMAN;P68871|HBB_HUMAN;A0A2R8Y7R2|A0A2R8Y7R2_HUMAN			FALSE
VPAPPSPQPATYTC(+57.02)VVSHEDSR	38.49	2394.13	22	5	799.057	3	18.597	69900	1110000	4046	20210526_HS_PLUG-3.raw	2	A0A0A0MS09|A0A0A0MS09_HUMAN;P01880|IGHD_HUMAN	Carbamidomethylation	C14:Carbamidomethylation:1000.00	FALSE
VPFDAATLHTSTAM(+15.99)AAQHGM(+15.99)DDDGTGQK	42.6	2904.27	28	0.5	727.077	4	17.3908	371000	6210000	3688	20210526_HS_PLUG-1.raw	3	A0A0A0MS51|A0A0A0MS51_HUMAN;P06396|GELS_HUMAN;A0A0A0MT01|A0A0A0MT01_HUMAN	Oxidation (M); Oxidation (M)		FALSE
VPGTSTSATLTGLTR	28.87	1460.78	15	3.2	731.404	2	17.6519	9650	329000	3789	20210526_HS_PLUG-1.raw	1				FALSE
VPQVSTPTLVE(+21.98)VSR	47.75	1532.82	14	-0.6	511.946	3	20.1038	28200000	225000000	4087	20210602_HS_50ng_PLUG-15.raw	22	A0A0C4DGB6|A0A0C4DGB6_HUMAN;#CONTAM#cont|000097|;#CONTAM#cont|000035|;A0A087WWT3|A0A087WWT3_HUMAN;P02768|ALBU_HUMAN;#CONTAM#cont|000017|;C9JKR2|C9JKR2_HUMAN;D6RHD5|D6RHD5_HUMAN;B7WNR0|B7WNR0_HUMAN;H0YA55|H0YA55_HUMAN	Sodium adduct	E11:Sodium adduct:29.32	FALSE
VPQVSTPTLVEVSR	72.27	1510.84	14	-3.7	756.422	2	20.1695	111000000	1110000000	4307	20210602_HS_50ng_PLUG-12.raw	174	A0A0C4DGB6|A0A0C4DGB6_HUMAN;#CONTAM#cont|000097|;#CONTAM#cont|000035|;A0A087WWT3|A0A087WWT3_HUMAN;P02768|ALBU_HUMAN;#CONTAM#cont|000017|;C9JKR2|C9JKR2_HUMAN;D6RHD5|D6RHD5_HUMAN;B7WNR0|B7WNR0_HUMAN;H0YA55|H0YA55_HUMAN			FALSE
VPTGGVEEGLLER	60.21	1354.71	13	2.3	678.366	2	18.3408	1410000	15300000	4035	20210526_HS_PLUG-2.raw	15	A0A0A0MS09|A0A0A0MS09_HUMAN;P01880|IGHD_HUMAN			FALSE
VPVAVQ(+0.98)GE(+21.98)DTVQSLTQGDGVAK	42.82	2220.09	22	5.9	741.041	3	20.6252	59600	918000	4273	20210602_HS_50ng_PLUG-8.raw	1	P01024|CO3_HUMAN	Deamidation (NQ); Sodium adduct	Q6:Deamidation (NQ):22.09;E8:Sodium adduct:0.00	FALSE
VPVAVQGE(+21.98)DTVQSLTQGDGVAK	65.36	2219.1	22	3.7	740.712	3	20.6227	183000	2730000	4296	20210602_HS_50ng_PLUG-10.raw	4	P01024|CO3_HUMAN	Sodium adduct	E8:Sodium adduct:0.00	FALSE
VPVAVQGED(+21.98)TVQSLTQGDGVAK	73.28	2219.1	22	2.2	740.713	3	20.6191	1430000	22600000	4863	20210526_HS_PLUG-2.raw	11	P01024|CO3_HUMAN	Sodium adduct	D9:Sodium adduct:14.02	FALSE
VPVAVQGEDTVQ(+0.98)SLTQGDGVAK	31.04	2198.11	22	6	733.714	3	20.2434			4182	20210602_HS_50ng_PLUG-8.raw	1	P01024|CO3_HUMAN	Deamidation (NQ)	Q12:Deamidation (NQ):0.00	FALSE
VPVAVQGEDTVQSLTQGD(+21.98)GVAK	58.27	2219.1	22	2.8	740.711	3	20.5993			4273	20210602_HS_50ng_PLUG-8.raw	1	P01024|CO3_HUMAN	Sodium adduct	D18:Sodium adduct:0.00	FALSE
VPVAVQGEDTVQSLTQGDGVAK	80.17	2197.12	22	-1.3	733.38	3	20.6581	7090000	82700000	4244	20210602_HS_50ng_PLUG-15.raw	32	P01024|CO3_HUMAN			FALSE
VQALEEANNDLENK	44.06	1585.76	14	1.9	793.891	2	14.785	62200	431000	2964	20210526_HS_PLUG-2.raw	1	P35527|K1C9_HUMAN			FALSE
VQFELHYQEVK	45.9	1418.72	11	1.5	473.916	3	19.1781	766000	9640000	4332	20210526_HS_PLUG-2.raw	4	#CONTAM#cont|000108|;Q5T985|Q5T985_HUMAN;Q5T987|Q5T987_HUMAN;P19823|ITIH2_HUMAN			FALSE
VQPYLDDFQK	52.19	1251.61	10	-1.3	626.813	2	17.9185	28400000	164000000	3507	20210602_HS_50ng_PLUG-10.raw	19	F8W696|F8W696_HUMAN;P02647|APOA1_HUMAN			FALSE
VSALLTPAEQTGTWK	58.49	1600.85	15	9.9	801.442	2	20.4815	258000	4590000	4827	20210526_HS_PLUG-2.raw	7	P04114|APOB_HUMAN			FALSE
VSFLSALEEYTK	68.57	1385.71	12	-4.3	693.861	2	26.6392	6950000	61300000	6842	20210526_HS_PLUG-2.raw	15	F8W696|F8W696_HUMAN;P02647|APOA1_HUMAN			FALSE
VSTAFVYTK	53.11	1014.54	9	-0.6	508.276	2	14.3402	2060000	5830000	2692	20210602_HS_50ng_PLUG-12.raw	15	P04114|APOB_HUMAN			FALSE
VSVFVPPR	69.5	899.523	8	0.1	450.769	2	17.1513	7270000	33200000	3256	20210602_HS_50ng_PLUG-15.raw	20	P01871|IGHM_HUMAN			FALSE
VSVLC(+57.02)QENYLIQEGEEITC(+57.02)K	39.04	2411.13	20	2.3	804.724	3	24.9927	34200	512000	6362	20210526_HS_PLUG-2.raw	1	P08603|CFAH_HUMAN	Carbamidomethylation; Carbamidomethylation	C5:Carbamidomethylation:1000.00;C19:Carbamidomethylation:1000.00	FALSE
VSVQLE(+21.98)ASPAFLAVPVEK	30.98	1905.02	18	0.7	636.018	3	25.7686	26800	469000	6488	20210526_HS_PLUG-3.raw	1	P01023|A2MG_HUMAN	Sodium adduct	E6:Sodium adduct:53.43	FALSE
VSVQLEASPAFLAVPVEK	65.37	1883.04	18	0.8	942.532	2	25.7127	1490000	17300000	6561	20210526_HS_PLUG-2.raw	6	P01023|A2MG_HUMAN			FALSE
VTAAPQSVC(+57.02)ALR	56.21	1271.67	12	-0.4	636.842	2	14.9127	12900000	69400000	3202	20210526_HS_PLUG-2.raw	36	P01023|A2MG_HUMAN	Carbamidomethylation	C9:Carbamidomethylation:1000.00	FALSE
VTGEGC(+57.02)VYLQTSLK	60.11	1553.78	14	5.4	777.902	2	18.6417	969000	6520000	4060	20210526_HS_PLUG-3.raw	3	P01023|A2MG_HUMAN	Carbamidomethylation	C6:Carbamidomethylation:1000.00	FALSE
VTLTC(+57.02)VAPLSGVDFQLR	56.63	1874.99	17	3.2	626.009	3	26.6009	389000	5580000	6836	20210526_HS_PLUG-1.raw	5	P04217|A1BG_HUMAN;M0R009|M0R009_HUMAN	Carbamidomethylation	C5:Carbamidomethylation:1000.00	FALSE
VTSIQDWVQK	55.04	1202.63	10	-1.9	602.323	2	18.5338	43300000	480000000	4104	20210526_HS_PLUG-2.raw	35	P00738|HPT_HUMAN;J3QLC9|J3QLC9_HUMAN;A0A087WU08|A0A087WU08_HUMAN;H0Y300|H0Y300_HUMAN;A0A0C4DGL8|A0A0C4DGL8_HUMAN;J3QR68|J3QR68_HUMAN			FALSE
VTTSQDM(+15.99)LSIM(+15.99)EK	45.12	1513.7	13	-0.7	757.857	2	12.7521	2950000	6500000	2339	20210602_HS_50ng_PLUG-5.raw	10	H9KV48|H9KV48_HUMAN;P05155|IC1_HUMAN;E9PGN7|E9PGN7_HUMAN	Oxidation (M); Oxidation (M)		FALSE
VTTVASHTSDSDVPSGVTEVVVK	63.76	2313.17	23	0.1	772.064	3	18.9416	4920000	51100000	3757	20210602_HS_50ng_PLUG-15.raw	15	H0YAS8|H0YAS8_HUMAN;P10909|CLUS_HUMAN;H0YC35|H0YC35_HUMAN			FALSE
VTVLGQPK	45.63	840.507	8	-4.4	421.259	2	7.0812	780000	2210000	1304	20210602_HS_50ng_PLUG-5.raw	9				FALSE
VVAEGFDFAN(+0.98)GINISPDGK	68.35	1949.94	19	4.6	975.984	2	24.1042	350000	3990000	6096	20210526_HS_PLUG-2.raw	3	P27169|PON1_HUMAN	Deamidation (NQ)	N10:Deamidation (NQ):28.36	FALSE
VVAEGFDFANGINISPDGK	49.14	1948.95	19	5.7	975.493	2	24.3536	22800	453000	6149	20210526_HS_PLUG-1.raw	1	P27169|PON1_HUMAN			FALSE
VVAQGVGIPEDSIFTM(+15.99)ADR	50.36	2019.99	19	-4.4	674.338	3	23.1161	1130000	12700000	5766	20210526_HS_PLUG-2.raw	11	P02760|AMBP_HUMAN;S4R471|S4R471_HUMAN;S4R3Y4|S4R3Y4_HUMAN	Oxidation (M)		FALSE
VVLHPNYSQVDIGLIK	74.6	1794	16	0.3	599.011	3	22.9443	1120000	9920000	5703	20210526_HS_PLUG-2.raw	4	P00738|HPT_HUMAN;J3QLC9|J3QLC9_HUMAN;H3BS21|H3BS21_HUMAN;A0A087WU08|A0A087WU08_HUMAN;H0Y300|H0Y300_HUMAN;A0A0C4DGL8|A0A0C4DGL8_HUMAN;J3QR68|J3QR68_HUMAN			FALSE
VVNNSPQPQNVVFDVQIPK	54.63	2121.12	19	2.9	708.05	3	23.5916	574000	9990000	5158	20210602_HS_50ng_PLUG-4.raw	13	Q5T985|Q5T985_HUMAN;Q5T987|Q5T987_HUMAN;P19823|ITIH2_HUMAN			FALSE
VVSVLTVLHQDWLN(+0.98)GK	68.35	1807.98	16	1.8	905.004	2	27.3969	5550000	30700000	7038	20210526_HS_PLUG-1.raw	6	P01857|IGHG1_HUMAN;A0A0A0MS08|A0A0A0MS08_HUMAN	Deamidation (NQ)	N14:Deamidation (NQ):61.69	FALSE
VVSVLTVVHQDWLN(+0.98)GK	59.77	1793.97	16	-0.7	598.998	3	25.3082	5290000	45200000	6410	20210526_HS_PLUG-1.raw	12	P01859|IGHG2_HUMAN;A0A286YEY4|A0A286YEY4_HUMAN	Deamidation (NQ)	N14:Deamidation (NQ):28.74	FALSE
VYAC(+57.02)E(+21.98)VTHQGLSSPVTK	47.87	1896.9	17	0.2	633.311	3	16.5735	677000	8290000	3466	20210526_HS_PLUG-2.raw	9	A0A5H1ZRQ3|A0A5H1ZRQ3_HUMAN;P01834|IGKC_HUMAN	Carbamidomethylation; Sodium adduct	C4:Carbamidomethylation:1000.00;E5:Sodium adduct:42.22	FALSE
VYAC(+57.02)EVTHQ(+0.98)GLSSPVTK	41.47	1875.9	17	8.8	626.314	3	17.5271	627000	1070000	3286	20210602_HS_50ng_PLUG-8.raw	1	A0A5H1ZRQ3|A0A5H1ZRQ3_HUMAN;P01834|IGKC_HUMAN	Carbamidomethylation; Deamidation (NQ)	C4:Carbamidomethylation:1000.00	FALSE
VYAC(+57.02)EVTHQGLSSPVTK	80.07	1874.92	17	0.2	938.471	2	16.5735	58400000	510000000	3453	20210526_HS_PLUG-2.raw	66	A0A5H1ZRQ3|A0A5H1ZRQ3_HUMAN;P01834|IGKC_HUMAN	Carbamidomethylation	C4:Carbamidomethylation:1000.00	FALSE
VYAYYNLEESC(+57.02)TR	70.78	1666.73	13	2.7	834.378	2	18.3914	2310000	18800000	4045	20210526_HS_PLUG-2.raw	10	P01024|CO3_HUMAN	Carbamidomethylation	C11:Carbamidomethylation:1000.00	FALSE
WELLQQVDTSTR	47.86	1474.74	12	2.8	738.383	2	21.5685	149000	2360000	5212	20210526_HS_PLUG-2.raw	3	#CONTAM#cont|000132|;#CONTAM#cont|000135|;#CONTAM#cont|000134|;P04264|K2C1_HUMAN			FALSE
WFYIASAFR	37.25	1159.58	9	-2.5	580.799	2	25.7055			6546	20210526_HS_PLUG-1.raw	2	P02763|A1AG1_HUMAN			FALSE
WLQGSQELPR	58.27	1212.63	10	2	607.321	2	17.4356	4210000	33800000	3376	20210602_HS_50ng_PLUG-10.raw	15	P01876|IGHA1_HUMAN;A0A286YEY1|A0A286YEY1_HUMAN			FALSE
YAASSYLSLTPEQWK	71.19	1742.85	15	2.6	872.439	2	23.5679	16100000	118000000	5902	20210526_HS_PLUG-2.raw	37				FALSE
YAATSQVLLPSK	67.05	1276.7	12	-3.2	639.357	2	17.2719	11900000	86300000	3303	20210602_HS_50ng_PLUG-15.raw	15	P01871|IGHM_HUMAN			FALSE
YDVENC(+57.02)LANK	50.77	1224.54	10	0.6	613.28	2	11.3638	8510000	7460000	2084	20210602_HS_50ng_PLUG-9.raw	11	P01023|A2MG_HUMAN	Carbamidomethylation	C6:Carbamidomethylation:1000.00	FALSE
YEDGTLSLTSTSDLQSGIIK	53.35	2127.06	20	3.9	1064.54	2	22.9505	206000	2440000	5669	20210526_HS_PLUG-1.raw	2	P04114|APOB_HUMAN			FALSE
YEELQITAGR	56	1178.59	10	-1.3	590.303	2	16.0928	3140000	14500000	3040	20210602_HS_50ng_PLUG-5.raw	15	#CONTAM#cont|000132|;#CONTAM#cont|000135|;#CONTAM#cont|000134|;P04264|K2C1_HUMAN			FALSE
YEELQVTVGR	44	1192.61	10	2.5	597.315	2	16.4869			3375	20210526_HS_PLUG-3.raw	2	P35908|K22E_HUMAN			FALSE
YEFLN(+0.98)GR	29.66	898.418	7	0.7	450.217	2	14.3932	91300	229000	2725	20210602_HS_50ng_PLUG-10.raw	2	P00747|PLMN_HUMAN	Deamidation (NQ)		FALSE
YEITTIHNLFR	44.57	1405.74	11	0.3	469.588	3	22.5863	337000	3710000	5481	20210526_HS_PLUG-3.raw	3	P05546|HEP2_HUMAN			FALSE
YENYELTLK	56.93	1171.58	9	2.2	586.797	2	17.9418	2600000	25800000	3517	20210602_HS_50ng_PLUG-8.raw	15	P04114|APOB_HUMAN			FALSE
YEVDQ(+0.98)QIQVLM(+15.99)DK	37.19	1624.77	13	5.3	813.394	2	19.5085	16100	151000	3987	20210602_HS_50ng_PLUG-12.raw	1	P04114|APOB_HUMAN	Deamidation (NQ); Oxidation (M)	Q5:Deamidation (NQ):0.00;M11:Oxidation (M):1000.00	FALSE
YEVDQQIQVLM(+15.99)DK	65.54	1623.78	13	0.1	812.901	2	19.4636	798000	10200000	4459	20210526_HS_PLUG-2.raw	13	P04114|APOB_HUMAN	Oxidation (M)		FALSE
YFIDFVAR	48	1029.53	8	1	515.774	2	22.5847	1980000	9610000	5572	20210526_HS_PLUG-2.raw	12	P01042|KNG1_HUMAN			FALSE
YGAATFTR	47.85	885.434	8	-2.6	443.723	2	6.8282	1030000	2650000	1238	20210602_HS_50ng_PLUG-9.raw	10	P01023|A2MG_HUMAN;P20742|PZP_HUMAN			FALSE
YGLVTYATYPK	63.57	1274.65	11	1.1	638.338	2	19.3845	2650000	26200000	4418	20210526_HS_PLUG-2.raw	15	E7ETN3|E7ETN3_HUMAN;P00751|CFAB_HUMAN;A0A0G2JH38|A0A0G2JH38_HUMAN;B4E1Z4|B4E1Z4_HUMAN			FALSE
YGM(+15.99)VAQVTQTLK	68.22	1353.7	12	1.3	677.856	2	16.4556	2000000	11100000	3083	20210602_HS_50ng_PLUG-15.raw	15	A8MUN2|A8MUN2_HUMAN;P04114|APOB_HUMAN	Oxidation (M)		FALSE
YGQTIRPIC(+57.02)LPC(+57.02)TEGTTR	44.66	2122.03	18	8	708.359	3	20.1898	23500	585000	4631	20210526_HS_PLUG-3.raw	1	H7C5H1|H7C5H1_HUMAN;E7ETN3|E7ETN3_HUMAN;P00751|CFAB_HUMAN;B4E1Z4|B4E1Z4_HUMAN	Carbamidomethylation; Carbamidomethylation	C9:Carbamidomethylation:1000.00;C12:Carbamidomethylation:1000.00	FALSE
YIC(+57.02)DNQDTISSK	41.4	1442.63	12	-9.9	722.317	2	7.7056	10800000	19100000	1549	20210602_HS_50ng_PLUG-7.raw	3	#CONTAM#cont|000097|;#CONTAM#cont|000035|;#CONTAM#cont|000017|	Carbamidomethylation	C3:Carbamidomethylation:1000.00	FALSE
YIC(+57.02)E(+21.98)NQDSISSK	50.62	1464.62	12	-7	733.313	2	6.5047	2730000	14200000	1282	20210526_HS_PLUG-2.raw	15	A0A0C4DGB6|A0A0C4DGB6_HUMAN;P02768|ALBU_HUMAN;C9JKR2|C9JKR2_HUMAN;D6RHD5|D6RHD5_HUMAN;B7WNR0|B7WNR0_HUMAN;H0YA55|H0YA55_HUMAN	Carbamidomethylation; Sodium adduct	C3:Carbamidomethylation:1000.00;E4:Sodium adduct:0.00	FALSE
YIC(+57.02)EN(+0.98)QDSISSK	52.59	1443.62	12	9.9	722.824	2	11.2834	15400000	45700000	2125	20210602_HS_50ng_PLUG-9.raw	24	A0A0C4DGB6|A0A0C4DGB6_HUMAN;P02768|ALBU_HUMAN;C9JKR2|C9JKR2_HUMAN;D6RHD5|D6RHD5_HUMAN;B7WNR0|B7WNR0_HUMAN;H0YA55|H0YA55_HUMAN	Carbamidomethylation; Deamidation (NQ)	C3:Carbamidomethylation:1000.00;N5:Deamidation (NQ):11.06	FALSE
YIC(+57.02)ENQ(+0.98)D(+21.98)SISSK	36.36	1465.6	12	0.5	733.808	2	6.6743	166000	1930000	1238	20210602_HS_50ng_PLUG-7.raw	2	A0A0C4DGB6|A0A0C4DGB6_HUMAN;P02768|ALBU_HUMAN;C9JKR2|C9JKR2_HUMAN;D6RHD5|D6RHD5_HUMAN;B7WNR0|B7WNR0_HUMAN;H0YA55|H0YA55_HUMAN	Carbamidomethylation; Deamidation (NQ); Sodium adduct	C3:Carbamidomethylation:1000.00;Q6:Deamidation (NQ):0.00;D7:Sodium adduct:12.16	FALSE
YIC(+57.02)ENQ(+0.98)DSISSK	47.91	1443.62	12	9.9	722.824	2	11.2834	559000	1410000	2005	20210602_HS_50ng_PLUG-9.raw	3	A0A0C4DGB6|A0A0C4DGB6_HUMAN;P02768|ALBU_HUMAN;C9JKR2|C9JKR2_HUMAN;D6RHD5|D6RHD5_HUMAN;B7WNR0|B7WNR0_HUMAN;H0YA55|H0YA55_HUMAN	Carbamidomethylation; Deamidation (NQ)	C3:Carbamidomethylation:1000.00;Q6:Deamidation (NQ):0.00	FALSE
YIC(+57.02)ENQD(+21.98)SISSK	55.35	1464.62	12	-7.9	733.31	2	6.9424	8290000	38800000	1232	20210602_HS_50ng_PLUG-14.raw	27	A0A0C4DGB6|A0A0C4DGB6_HUMAN;P02768|ALBU_HUMAN;C9JKR2|C9JKR2_HUMAN;D6RHD5|D6RHD5_HUMAN;B7WNR0|B7WNR0_HUMAN;H0YA55|H0YA55_HUMAN	Carbamidomethylation; Sodium adduct	C3:Carbamidomethylation:1000.00;D7:Sodium adduct:22.34	FALSE
YIC(+57.02)ENQDSISSK	63.01	1442.63	12	2.9	722.33	2	8.7258	325000000	1400000000	2407	20210526_HS_PLUG-2.raw	402	A0A0C4DGB6|A0A0C4DGB6_HUMAN;P02768|ALBU_HUMAN;C9JKR2|C9JKR2_HUMAN;D6RHD5|D6RHD5_HUMAN;B7WNR0|B7WNR0_HUMAN;H0YA55|H0YA55_HUMAN	Carbamidomethylation	C3:Carbamidomethylation:1000.00	FALSE
YIYGKPVQGVAYVR	55.78	1611.88	14	4.5	538.304	3	18.5642	152000	3480000	4118	20210526_HS_PLUG-2.raw	3				FALSE
YLGEEYVK	53.75	999.491	8	-1.3	500.752	2	14.6938	66900000	483000000	2858	20210602_HS_50ng_PLUG-5.raw	67	P02787|TRFE_HUMAN			FALSE
YLTWASR	47.47	895.455	7	-1.2	448.734	2	15.5016	6630000	15400000	2891	20210602_HS_50ng_PLUG-10.raw	18	P01876|IGHA1_HUMAN;A0A286YEY1|A0A286YEY1_HUMAN			FALSE
YLYEIAR	56.45	926.486	7	-0.5	464.25	2	20.7535	668000000	4730000000	4742	20210602_HS_50ng_PLUG-5.raw	471	A0A0C4DGB6|A0A0C4DGB6_HUMAN;#CONTAM#cont|000097|;#CONTAM#cont|000035|;P02768|ALBU_HUMAN;H7C013|H7C013_HUMAN;#CONTAM#cont|000017|;H0YA55|H0YA55_HUMAN			FALSE
YNSQNQSNNQFVLYR	62.09	1873.87	15	2.2	937.948	2	18.3345	480000	3590000	4031	20210526_HS_PLUG-2.raw	3	P01042|KNG1_HUMAN			FALSE
YSLTYIYTGLSK	59.79	1407.73	12	3.3	704.874	2	22.9253	394000	5660000	5006	20210602_HS_50ng_PLUG-5.raw	8	C9JEV0|C9JEV0_HUMAN;P25311|ZA2G_HUMAN			FALSE
YSPSFQGQVTISADK	57.14	1626.79	15	2.4	814.407	2	18.4052	277000	3330000	4056	20210526_HS_PLUG-2.raw	3				FALSE
YTC(+57.02)LPGYVR	43.16	1127.54	9	3.6	564.781	2	16.7061	637000	4520000	3128	20210602_HS_50ng_PLUG-14.raw	7	P04003|C4BPA_HUMAN	Carbamidomethylation	C3:Carbamidomethylation:1000.00	FALSE
YTFELSR	46.83	914.45	7	-1	458.232	2	17.169	5980000	33700000	3272	20210602_HS_50ng_PLUG-8.raw	18	P02774|VTDB_HUMAN;D6RF35|D6RF35_HUMAN			FALSE
YTIAALLSPYSYSTTAVVTNPK	56.67	2359.23	22	2.6	787.423	3	27.4192	363000	4390000	7040	20210526_HS_PLUG-2.raw	4	P02766|TTHY_HUMAN;A0A087WT59|A0A087WT59_HUMAN			FALSE
YTYNYEAESSSGVPGTADSR	45.31	2152.92	20	0	1077.47	2	16.2742	152000	1800000	3361	20210526_HS_PLUG-1.raw	3	A8MUN2|A8MUN2_HUMAN;A0A669KB70|A0A669KB70_HUMAN;P04114|APOB_HUMAN			FALSE
YVGGQEHFAHLLILR	53.28	1751.95	15	1.5	438.996	4	23.1068	48300	433000	5727	20210526_HS_PLUG-1.raw	1	P02763|A1AG1_HUMAN			FALSE
YVLPNFEVK	50.29	1107.6	9	5	554.808	2	21.863	3710000	32000000	4645	20210602_HS_50ng_PLUG-10.raw	11				FALSE
YVM(+15.99)LPVAD(+21.98)QDQC(+57.02)IR	36.59	1744.79	14	2.5	582.607	3	19.5289	347000	7770000	4481	20210526_HS_PLUG-2.raw	6	P00738|HPT_HUMAN;J3QLC9|J3QLC9_HUMAN;H3BS21|H3BS21_HUMAN;A0A087WU08|A0A087WU08_HUMAN;H0Y300|H0Y300_HUMAN;A0A0C4DGL8|A0A0C4DGL8_HUMAN;J3QR68|J3QR68_HUMAN	Oxidation (M); Sodium adduct; Carbamidomethylation	M3:Oxidation (M):1000.00;D8:Sodium adduct:14.63;C12:Carbamidomethylation:1000.00	FALSE
YVM(+15.99)LPVADQDQC(+57.02)IR	72.88	1722.81	14	0.5	862.411	2	19.513	22200000	336000000	3980	20210602_HS_50ng_PLUG-12.raw	44	P00738|HPT_HUMAN;J3QLC9|J3QLC9_HUMAN;H3BS21|H3BS21_HUMAN;A0A087WU08|A0A087WU08_HUMAN;H0Y300|H0Y300_HUMAN;A0A0C4DGL8|A0A0C4DGL8_HUMAN;J3QR68|J3QR68_HUMAN	Oxidation (M); Carbamidomethylation	C12:Carbamidomethylation:1000.00	FALSE
YVTSAPM(+15.99)PEPQAPGR	64.1	1615.77	15	2.1	808.892	2	13.5114	8140000	21400000	2501	20210602_HS_50ng_PLUG-5.raw	22	P01871|IGHM_HUMAN	Oxidation (M)		FALSE
YWGVASFLQK	51.39	1197.62	10	1.9	599.82	2	24.2909	335000	3300000	6154	20210526_HS_PLUG-2.raw	3				FALSE
YYC(+57.02)FQGNQFLR	58.9	1494.67	11	2.3	748.348	2	21.4155	1670000	13400000	5154	20210526_HS_PLUG-2.raw	6	P02790|HEMO_HUMAN;Q9BS19|Q9BS19_HUMAN	Carbamidomethylation	C3:Carbamidomethylation:1000.00	FALSE
YYTYLIM(+15.99)NK	48.56	1223.59	9	1.6	612.803	2	18.0188	10400000	49500000	3537	20210602_HS_50ng_PLUG-10.raw	15	P01024|CO3_HUMAN	Oxidation (M)		FALSE
