# Supplementary material for: Preparative capillary electrophoresis (CE) fractionation of protein digests improves protein and peptide identification in bottom-up proteomics
Source: Royal Society of Chemistry journal article supplement (doi:10.1039/d1ay02145a), 2022-01-01
Supplement: d1ay02145a7.xlsx [file d1ay02145a7.xlsx]

## Sheet: SI_Raw_control_peptides_and_pro
Peptide	-10LgP	Mass	Length	ppm	m/z	z	RT	Area Raw_15inj_ctrl_B	Intensity Raw_15inj_ctrl_B	Scan	Source File	#Spec	Accession	PTM	AScore	Decoy
AAC(+57.02)LLPK	34.74	771.431	7	-0.1	772.438	1	7.5892	258000	757000	1490	20210614_HS_50ng_RAW-10.raw	1	A0A0C4DGB6|A0A0C4DGB6_HUMAN;P02768|ALBU_HUMAN;D6RHD5|D6RHD5_HUMAN;B7WNR0|B7WNR0_HUMAN;H0YA55|H0YA55_HUMAN	Carbamidomethylation	C3:Carbamidomethylation:1000.00	FALSE
AADDTWEPFASGK	71.53	1393.62	13	-3.7	697.81	2	19.3443	30500000	183000000	4035	20210614_HS_50ng_RAW-2.raw	33	P02766|TTHY_HUMAN;A0A087WT59|A0A087WT59_HUMAN			FALSE
AAFTE(+21.98)C(+57.02)C(+57.02)QAADK	47.91	1392.54	12	-5.1	697.274	2	4.8458	4740000	25000000	906	20210614_HS_50ng_RAW-1.raw	27	A0A0C4DGB6|A0A0C4DGB6_HUMAN;P02768|ALBU_HUMAN;D6RHD5|D6RHD5_HUMAN;B7WNR0|B7WNR0_HUMAN;H0YA55|H0YA55_HUMAN	Sodium adduct; Carbamidomethylation; Carbamidomethylation	E5:Sodium adduct:37.05;C6:Carbamidomethylation:1000.00;C7:Carbamidomethylation:1000.00	FALSE
AAFTEC(+57.02)C(+57.02)Q(+0.98)AADK	44.17	1371.54	12	9.7	686.786	2	11.7562	23700000	86400000	2271	20210614_HS_50ng_RAW-8.raw	42	A0A0C4DGB6|A0A0C4DGB6_HUMAN;P02768|ALBU_HUMAN;D6RHD5|D6RHD5_HUMAN;B7WNR0|B7WNR0_HUMAN;H0YA55|H0YA55_HUMAN	Carbamidomethylation; Carbamidomethylation; Deamidation (NQ)	C6:Carbamidomethylation:1000.00;C7:Carbamidomethylation:1000.00	FALSE
AAFTEC(+57.02)C(+57.02)QAADK	69.64	1370.56	12	-5.2	686.283	2	6.4808	214000000	735000000	1405	20210614_HS_50ng_RAW-4.raw	329	A0A0C4DGB6|A0A0C4DGB6_HUMAN;P02768|ALBU_HUMAN;D6RHD5|D6RHD5_HUMAN;B7WNR0|B7WNR0_HUMAN;H0YA55|H0YA55_HUMAN	Carbamidomethylation; Carbamidomethylation	C6:Carbamidomethylation:1000.00;C7:Carbamidomethylation:1000.00	FALSE
AAISGENAGLVR	53.93	1156.62	12	0.2	579.317	2	7.3836	1010000	3720000	1549	20210614_HS_50ng_RAW-1.raw	5	P19827|ITIH1_HUMAN;F8WAS2|F8WAS2_HUMAN			FALSE
AAPSVTLFPPSSE(+21.98)ELQANK	33.5	2006.99	19	-2	670.003	3	22.7092	1110000	6840000	5659	20210614_HS_50ng_RAW-1.raw	4	P0DOY2|IGLC2_HUMAN;P0DOY3|IGLC3_HUMAN	Sodium adduct	E13:Sodium adduct:0.00	FALSE
AAPSVTLFPPSSEELQANK	54.32	1985.01	19	-0.9	662.677	3	22.4713	213000000	710000000	5238	20210614_HS_50ng_RAW-3.raw	56	P0DOY2|IGLC2_HUMAN;P0DOY3|IGLC3_HUMAN			FALSE
AAQVTIQSSGTFSSK	75.9	1510.76	15	-2.4	756.387	2	14.6575	14200000	42500000	2814	20210614_HS_50ng_RAW-4.raw	40	P01023|A2MG_HUMAN			FALSE
AC(+57.02)EPGVDYVYK	59.55	1299.58	11	-2.2	650.794	2	15.9578	9690000	57700000	3108	20210614_HS_50ng_RAW-2.raw	15	P01024|CO3_HUMAN;M0QXZ3|M0QXZ3_HUMAN	Carbamidomethylation	C2:Carbamidomethylation:1000.00	FALSE
ADDKETC(+57.02)FAEEGK	74.09	1498.62	13	-5.2	500.546	3	4.759	104000000	426000000	1128	20210614_HS_50ng_RAW-1.raw	196	A0A087WWT3|A0A087WWT3_HUMAN;P02768|ALBU_HUMAN;C9JKR2|C9JKR2_HUMAN;D6RHD5|D6RHD5_HUMAN;B7WNR0|B7WNR0_HUMAN;H0YA55|H0YA55_HUMAN	Carbamidomethylation	C7:Carbamidomethylation:1000.00	FALSE
ADDKETC(+57.02)FAEEGKK	68.26	1626.72	14	-3.7	543.245	3	4.4512	117000000	415000000	897	20210614_HS_50ng_RAW-1.raw	154	A0A087WWT3|A0A087WWT3_HUMAN;P02768|ALBU_HUMAN;C9JKR2|C9JKR2_HUMAN;D6RHD5|D6RHD5_HUMAN;B7WNR0|B7WNR0_HUMAN;H0YA55|H0YA55_HUMAN	Carbamidomethylation	C7:Carbamidomethylation:1000.00	FALSE
ADGSYAAWLSR	59.5	1195.56	11	-2	598.787	2	19.0626	842000	8050000	4373	20210614_HS_50ng_RAW-1.raw	7				FALSE
ADLFYDVEALDLESPK	40.33	1823.88	16	1.3	912.95	2	26.4632			6619	20210614_HS_50ng_RAW-1.raw	1	P04196|HRG_HUMAN			FALSE
ADLSGITGAR	43.52	959.504	10	-0.1	480.758	2	8.1738	2740000	10400000	1585	20210614_HS_50ng_RAW-2.raw	12	G3V3A0|G3V3A0_HUMAN;P01011|AACT_HUMAN			FALSE
ADRDQYELLC(+57.02)LDNTR	72.21	1880.87	15	-2.1	627.962	3	19.9829	50000000	519000000	4674	20210614_HS_50ng_RAW-1.raw	42	C9JVG0|C9JVG0_HUMAN;P02787|TRFE_HUMAN	Carbamidomethylation	C10:Carbamidomethylation:1000.00	FALSE
ADSVVDLLSYN(+0.98)VQGSGETTYDHK	45.45	2498.14	23	6.7	833.728	3	23.3836			5419	20210614_HS_50ng_RAW-8.raw	2	P04114|APOB_HUMAN	Deamidation (NQ)	N11:Deamidation (NQ):9.40	FALSE
ADSVVDLLSYNVQ(+0.98)GSGETTYDHK	43	2498.14	23	9.6	833.73	3	23.3501			5480	20210614_HS_50ng_RAW-9.raw	1	P04114|APOB_HUMAN	Deamidation (NQ)	Q13:Deamidation (NQ):0.00	FALSE
ADSVVDLLSYNVQGSGETTYDHK	53.35	2497.16	23	1.8	833.396	3	23.3928	1290000	12300000	5381	20210614_HS_50ng_RAW-3.raw	13	P04114|APOB_HUMAN			FALSE
AEATTLHVAPQGTAMAVSTFR	46.26	2158.08	21	4.3	720.372	3	21.1936	27100	644000	4829	20210614_HS_50ng_RAW-7.raw	2	P07360|CO8G_HUMAN			FALSE
AEDHFSVIDFNQNIR	66.82	1803.85	15	1.4	602.293	3	22.1897	3200000	29500000	5066	20210614_HS_50ng_RAW-8.raw	15	Q5T985|Q5T985_HUMAN;P19823|ITIH2_HUMAN			FALSE
AEEEHLGILGPQLHADVGDK	63.7	2127.06	20	3.2	710.029	3	20.569	554000	7500000	4722	20210614_HS_50ng_RAW-13.raw	10	E9PFZ2|E9PFZ2_HUMAN;H7C5R1|H7C5R1_HUMAN;P00450|CERU_HUMAN			FALSE
AEFAE(+21.98)VSK	45.53	901.416	8	-5.6	451.713	2	5.2139	26600000	57900000	1033	20210614_HS_50ng_RAW-1.raw	42	A0A0C4DGB6|A0A0C4DGB6_HUMAN;P02768|ALBU_HUMAN;C9JKR2|C9JKR2_HUMAN;D6RHD5|D6RHD5_HUMAN;B7WNR0|B7WNR0_HUMAN;H0YA55|H0YA55_HUMAN	Sodium adduct	E5:Sodium adduct:27.89	FALSE
AEFAEVSK	50.32	879.434	8	-2.4	440.723	2	12.405	400000000	2180000000	2629	20210614_HS_50ng_RAW-1.raw	273	A0A0C4DGB6|A0A0C4DGB6_HUMAN;P02768|ALBU_HUMAN;C9JKR2|C9JKR2_HUMAN;D6RHD5|D6RHD5_HUMAN;B7WNR0|B7WNR0_HUMAN;H0YA55|H0YA55_HUMAN			FALSE
AEFQDALEK	46.65	1049.5	9	-2.7	525.757	2	7.8929	2600000	4720000	1829	20210614_HS_50ng_RAW-1.raw	14				FALSE
AEM(+15.99)ADQAAAWLTR	59.91	1448.67	13	-1	725.342	2	18.7488	168000	1770000	4290	20210614_HS_50ng_RAW-1.raw	5		Oxidation (M)		FALSE
AEMADQAAAWLTR	73.57	1432.68	13	0.8	717.346	2	21.3403	2230000	27200000	4799	20210614_HS_50ng_RAW-5.raw	18				FALSE
AEPLAFTFSHDYK	42.81	1524.72	13	1.6	509.25	3	21.406	491000	5130000	4775	20210614_HS_50ng_RAW-6.raw	7	P04114|APOB_HUMAN			FALSE
AESPEVC(+57.02)FNEESPK	74.98	1621.69	14	-1.5	811.852	2	16.0318	778000	8020000	3154	20210614_HS_50ng_RAW-5.raw	15	P43652|AFAM_HUMAN	Carbamidomethylation	C7:Carbamidomethylation:1000.00	FALSE
AFDIC(+57.02)PLVK	47.55	1061.56	9	2.9	531.788	2	21.3512	21500	285000	4958	20210614_HS_50ng_RAW-10.raw	1	P01031|CO5_HUMAN	Carbamidomethylation	C5:Carbamidomethylation:1000.00	FALSE
AGALNSNDAFVLK	68.78	1318.69	13	1.1	660.352	2	19.4203	2130000	25300000	4140	20210614_HS_50ng_RAW-3.raw	13	A0A0A0MS51|A0A0A0MS51_HUMAN;P06396|GELS_HUMAN;A0A0A0MT01|A0A0A0MT01_HUMAN			FALSE
AGDFLEANYM(+15.99)NLQR	56.01	1656.76	14	0.6	829.386	2	19.9213	726000	10600000	4666	20210614_HS_50ng_RAW-1.raw	12	M0R0Q9|M0R0Q9_HUMAN;P01024|CO3_HUMAN	Oxidation (M)		FALSE
AGDFLEANYMNLQR	63.11	1640.76	14	-0.4	821.388	2	22.0628	11400000	98900000	5395	20210614_HS_50ng_RAW-1.raw	17	M0R0Q9|M0R0Q9_HUMAN;P01024|CO3_HUMAN			FALSE
AGEQVTYTC(+57.02)ATYYK	56.54	1653.73	14	-3.7	827.871	2	15.9606	335000	4800000	3123	20210614_HS_50ng_RAW-8.raw	11	P08603|CFAH_HUMAN	Carbamidomethylation	C9:Carbamidomethylation:1000.00	FALSE
AGEVQEPELR	48.9	1126.56	10	-0.4	564.288	2	7.4589	1020000	3980000	1376	20210614_HS_50ng_RAW-8.raw	13	P25311|ZA2G_HUMAN			FALSE
AGVETTTPSK	48.55	989.503	10	-6.1	495.756	2	3.2969	1310000	2920000	423	20210614_HS_50ng_RAW-1.raw	11	P0DOY2|IGLC2_HUMAN;P0DOY3|IGLC3_HUMAN			FALSE
AIEDYINEFSVR	64.37	1454.7	12	0.7	728.36	2	23.1887	1170000	13200000	5358	20210614_HS_50ng_RAW-8.raw	15	P02748|CO9_HUMAN			FALSE
AIGYLN(+0.98)TGYQR	40.18	1255.62	11	-4.8	628.814	2	14.9483	305000	2400000	3228	20210614_HS_50ng_RAW-1.raw	9	P01023|A2MG_HUMAN	Deamidation (NQ)	N6:Deamidation (NQ):19.86	FALSE
AIGYLNTGYQR	65.4	1254.64	11	-1.2	628.324	2	16.5845	22700000	127000000	3296	20210614_HS_50ng_RAW-5.raw	22	P01023|A2MG_HUMAN			FALSE
AIPVTQYLK	46.62	1031.6	9	3	516.81	2	19.3996	1320000	12900000	4145	20210614_HS_50ng_RAW-8.raw	15	P43652|AFAM_HUMAN			FALSE
AKPALEDLR	23.5	1011.57	9	-1.8	506.792	2	7.6977	200000	457000	1412	20210614_HS_50ng_RAW-3.raw	1	F8W696|F8W696_HUMAN;P02647|APOA1_HUMAN			FALSE
ALEWLAR	29.08	857.476	7	0	429.745	2	19.2645	133000	1070000	4214	20210614_HS_50ng_RAW-12.raw	3				FALSE
ALLAFQESK	40.59	1005.55	9	-0.8	503.782	2	16.4256	56000	587000	3574	20210614_HS_50ng_RAW-1.raw	2				FALSE
ALLAYAFALAGNQDK	76.38	1564.83	15	1.7	783.421	2	25.7732	488000	6540000	6085	20210614_HS_50ng_RAW-4.raw	11	P01023|A2MG_HUMAN			FALSE
ALNHLPLEYNSALYSR	47.26	1859.95	16	1	620.992	3	21.9044	129000	1940000	5151	20210614_HS_50ng_RAW-10.raw	5				FALSE
ALPAPIEK	41.19	837.496	8	-3.4	419.754	2	8.3449	57700000	347000000	1846	20210614_HS_50ng_RAW-3.raw	116	A0A4W9A917|A0A4W9A917_HUMAN;P01857|IGHG1_HUMAN;P01860|IGHG3_HUMAN;A0A0A0MS08|A0A0A0MS08_HUMAN;A0A0A0MS07|A0A0A0MS07_HUMAN;A0A286YES1|A0A286YES1_HUMAN			FALSE
ALQDQLVLVAAK	60.62	1267.75	12	0.1	634.882	2	20.7523	5140000	48700000	4950	20210614_HS_50ng_RAW-1.raw	15	P01019|ANGT_HUMAN			FALSE
ALVEQGFTVPEIK	68.89	1429.78	13	-4.6	715.895	2	22.7522	3750000	43400000	5217	20210614_HS_50ng_RAW-8.raw	15	P04114|APOB_HUMAN			FALSE
ALVQQMEQLR	36.03	1214.64	10	-2.2	608.328	2	18.4899	34600	599000	4011	20210614_HS_50ng_RAW-10.raw	2	P06727|APOA4_HUMAN			FALSE
ALYLQYTDETFR	75.24	1518.74	12	-2.6	760.373	2	21.8352	2640000	21800000	4980	20210614_HS_50ng_RAW-4.raw	14	E9PFZ2|E9PFZ2_HUMAN;P00450|CERU_HUMAN			FALSE
ALYWVN(+0.98)GQVPDGVSK	69.47	1632.81	15	5.2	817.419	2	21.598	1950000	18000000	4848	20210614_HS_50ng_RAW-8.raw	14	A8MUN2|A8MUN2_HUMAN;P04114|APOB_HUMAN	Deamidation (NQ)	N6:Deamidation (NQ):8.22	FALSE
ALYYDLISSPDIHGTYK	49.7	1954.97	17	0.1	652.663	3	23.2642	179000	2530000	5561	20210614_HS_50ng_RAW-10.raw	6	I3L4Z0|I3L4Z0_HUMAN;P36955|PEDF_HUMAN;I3L2R7|I3L2R7_HUMAN			FALSE
AMAVEDIISR	52.6	1103.56	10	5.2	552.792	2	18.7912	285000	4260000	4288	20210614_HS_50ng_RAW-1.raw	11				FALSE
AN(+0.98)PTVTLFPPSSEELQANK	36.95	2043.02	19	4.1	682.015	3	22.2881	463000	4180000	5173	20210614_HS_50ng_RAW-12.raw	2	A0A0B4J231|A0A0B4J231_HUMAN;B9A064|IGLL5_HUMAN	Deamidation (NQ)	N2:Deamidation (NQ):26.00	FALSE
ANPTVTLFPPSSE(+21.98)ELQANK	30.73	2064.01	19	2.2	689.013	3	22.4171	95500	872000	5319	20210614_HS_50ng_RAW-10.raw	2	A0A0B4J231|A0A0B4J231_HUMAN;B9A064|IGLL5_HUMAN	Sodium adduct	E13:Sodium adduct:0.00	FALSE
ANPTVTLFPPSSEELQANK	37.85	2042.03	19	1.2	1022.02	2	22.1826	6150000	16200000	5031	20210614_HS_50ng_RAW-3.raw	10	A0A0B4J231|A0A0B4J231_HUMAN;B9A064|IGLL5_HUMAN			FALSE
ANTVQ(+0.98)EATFQMELPK	57.91	1706.82	15	-2.8	854.414	2	21.1671	8780000	59200000	4905	20210614_HS_50ng_RAW-8.raw	4	Q14624|ITIH4_HUMAN;B7ZKJ8|B7ZKJ8_HUMAN	Deamidation (NQ)	Q5:Deamidation (NQ):41.87	FALSE
ANTVQEATFQMELPK	66.12	1705.83	15	-1.4	853.923	2	21.7349	549000	9200000	4934	20210614_HS_50ng_RAW-5.raw	12	Q14624|ITIH4_HUMAN;B7ZKJ8|B7ZKJ8_HUMAN			FALSE
APDVFPIISGC(+57.02)R	31.94	1330.67	12	-0.2	666.342	2	22.3314	23700	360000	5301	20210614_HS_50ng_RAW-13.raw	1	A0A0A0MS09|A0A0A0MS09_HUMAN;P01880|IGHD_HUMAN	Carbamidomethylation	C11:Carbamidomethylation:1000.00	FALSE
APSTWLTAYVVK	57.73	1334.72	12	-1.3	668.366	2	24.2008	2720000	34800000	5302	20210614_HS_50ng_RAW-2.raw	15	P01024|CO3_HUMAN			FALSE
AQLGDLPWQVAIK	69.82	1437.8	13	-2	719.905	2	25.2985	1080000	11200000	5942	20210614_HS_50ng_RAW-5.raw	14	G3XAM2|G3XAM2_HUMAN;A0A2R8Y3M9|A0A2R8Y3M9_HUMAN;E7ETH0|E7ETH0_HUMAN;P05156|CFAI_HUMAN			FALSE
AQPVQVAEGSEPDGFWEALGGK	50.86	2271.08	22	2.7	758.036	3	24.9542	1040000	10400000	6013	20210614_HS_50ng_RAW-10.raw	13	A0A0A0MS51|A0A0A0MS51_HUMAN;P06396|GELS_HUMAN;A0A0A0MT01|A0A0A0MT01_HUMAN			FALSE
AQTTVTC(+57.02)MEN(+0.98)GWSPTPR	62.93	1935.85	17	2.2	968.932	2	18.5064	284000	4100000	4044	20210614_HS_50ng_RAW-13.raw	8	A0A0D9SG88|A0A0D9SG88_HUMAN;P08603|CFAH_HUMAN;Q5TFM2|Q5TFM2_HUMAN	Carbamidomethylation; Deamidation (NQ)	C7:Carbamidomethylation:1000.00;N10:Deamidation (NQ):47.82	FALSE
AREDIFMETLK	41.31	1351.68	11	-1.7	451.567	3	20.1458	30800	861000	4430	20210614_HS_50ng_RAW-5.raw	4	C9JEV0|C9JEV0_HUMAN;P25311|ZA2G_HUMAN			FALSE
ASGSLPYTQTLQDHLNSLK	48.3	2072.05	19	2.3	691.693	3	22.4582	389000	5370000	5182	20210614_HS_50ng_RAW-5.raw	5	P04114|APOB_HUMAN			FALSE
ASQSVSSNLAWYQQKPGQAPR	40.84	2302.15	21	3.9	768.392	3	18.9204	130000	2630000	4034	20210614_HS_50ng_RAW-5.raw	6				FALSE
ASSIIDELFQDR	62.69	1392.69	12	0.9	697.352	2	25.6719	3370000	30700000	5958	20210614_HS_50ng_RAW-6.raw	15	H0YLK8|H0YLK8_HUMAN;P10909|CLUS_HUMAN;H0YC35|H0YC35_HUMAN;E7ERK6|E7ERK6_HUMAN			FALSE
ASYLDC(+57.02)IR	52.11	996.47	8	-2.7	499.241	2	14.4445	10400000	28100000	3047	20210614_HS_50ng_RAW-1.raw	18	F8WCI6|F8WCI6_HUMAN;P02787|TRFE_HUMAN;F8WEK9|F8WEK9_HUMAN;C9JB55|C9JB55_HUMAN	Carbamidomethylation	C6:Carbamidomethylation:1000.00	FALSE
ATFGC(+57.02)HDGYSLDGPEEIEC(+57.02)TK	98.57	2384.99	21	1.3	796.005	3	19.443	2380000	23000000	4163	20210614_HS_50ng_RAW-15.raw	15	J3QLI0|J3QLI0_HUMAN;J3KS17|J3KS17_HUMAN;P02749|APOH_HUMAN	Carbamidomethylation; Carbamidomethylation	C5:Carbamidomethylation:1000.00;C19:Carbamidomethylation:1000.00	FALSE
ATGVLYDYVNK	64.35	1241.63	11	1.4	621.823	2	17.9472	5140000	30500000	3724	20210614_HS_50ng_RAW-5.raw	15	P04114|APOB_HUMAN			FALSE
ATLLDIYK	36.34	935.533	8	1.6	468.774	2	19.9273	157000	1390000	4327	20210614_HS_50ng_RAW-3.raw	5	P01031|CO5_HUMAN			FALSE
ATLYALSHAVNNYHK	41.53	1700.86	15	2.9	567.963	3	18.5237	227000	2880000	3880	20210614_HS_50ng_RAW-8.raw	5	A8MUN2|A8MUN2_HUMAN;P04114|APOB_HUMAN			FALSE
ATTVTGTPC(+57.02)QDWAAQEPHR	71.98	2124.96	19	-6.9	709.324	3	16.8859	2070000	29600000	3432	20210614_HS_50ng_RAW-4.raw	17	P00747|PLMN_HUMAN	Carbamidomethylation	C9:Carbamidomethylation:1000.00	FALSE
ATVLNYLPK	32.68	1017.59	9	1.9	509.8	2	20.5278	854000	5840000	4393	20210614_HS_50ng_RAW-2.raw	1	P01023|A2MG_HUMAN;P20742|PZP_HUMAN			FALSE
ATWSGAVLAGR	66.93	1087.58	11	2.1	544.797	2	17.6527	7030000	39400000	3582	20210614_HS_50ng_RAW-3.raw	16	P04217|A1BG_HUMAN			FALSE
AVGDKLPEC(+57.02)EAVC(+57.02)GKPK	44.22	1856.91	17	-1.9	619.977	3	7.4647	503000	2990000	1614	20210614_HS_50ng_RAW-1.raw	5	P00738|HPT_HUMAN;H0Y300|H0Y300_HUMAN;A0A0C4DGL8|A0A0C4DGL8_HUMAN;J3QR68|J3QR68_HUMAN	Carbamidomethylation; Carbamidomethylation	C9:Carbamidomethylation:1000.00;C13:Carbamidomethylation:1000.00	FALSE
AVGSGATFSHYYYMILSR	40.04	2021.97	18	-0.6	674.996	3	25.6609	12000	269000	6107	20210614_HS_50ng_RAW-7.raw	1				FALSE
AVISPGFDVFAK	56.68	1249.67	12	3.2	625.845	2	23.4668	587000	6460000	5407	20210614_HS_50ng_RAW-3.raw	13	E7ETN3|E7ETN3_HUMAN;B4E1Z4|B4E1Z4_HUMAN			FALSE
AVLDVFEEGTEASAATAVK	79.95	1906.95	19	-0.1	954.483	2	22.8013	10900000	82900000	5288	20210614_HS_50ng_RAW-4.raw	15	G3V3A0|G3V3A0_HUMAN;P01011|AACT_HUMAN			FALSE
AVLTIDEK	45.78	887.496	8	-4.9	444.753	2	7.4083	50100000	110000000	1558	20210614_HS_50ng_RAW-1.raw	53				FALSE
AVLYNYR	39.47	897.471	7	-0.5	449.743	2	8.5364	2670000	2930000	1598	20210614_HS_50ng_RAW-15.raw	18	P01024|CO3_HUMAN			FALSE
AVM(+15.99)D(+21.98)DFAAFVEK	44.24	1379.6	12	-9.2	460.871	3	21.0907	235000	1570000	5062	20210614_HS_50ng_RAW-1.raw	3	A0A0C4DGB6|A0A0C4DGB6_HUMAN;A0A087WWT3|A0A087WWT3_HUMAN;P02768|ALBU_HUMAN;C9JKR2|C9JKR2_HUMAN;D6RHD5|D6RHD5_HUMAN;B7WNR0|B7WNR0_HUMAN;H0YA55|H0YA55_HUMAN	Oxidation (M); Sodium adduct	M3:Oxidation (M):1000.00;D4:Sodium adduct:0.00	FALSE
AVM(+15.99)DD(+21.98)FAAFVEK	38.56	1379.6	12	1.4	690.81	2	21.365	1270000	7570000	4727	20210614_HS_50ng_RAW-6.raw	6	A0A0C4DGB6|A0A0C4DGB6_HUMAN;A0A087WWT3|A0A087WWT3_HUMAN;P02768|ALBU_HUMAN;C9JKR2|C9JKR2_HUMAN;D6RHD5|D6RHD5_HUMAN;B7WNR0|B7WNR0_HUMAN;H0YA55|H0YA55_HUMAN	Oxidation (M); Sodium adduct	M3:Oxidation (M):1000.00;D5:Sodium adduct:14.02	FALSE
AVM(+15.99)DDFAAFVEK	70.7	1357.62	12	-8.3	679.813	2	23.2056	543000000	1940000000	5393	20210614_HS_50ng_RAW-5.raw	227	A0A0C4DGB6|A0A0C4DGB6_HUMAN;A0A087WWT3|A0A087WWT3_HUMAN;P02768|ALBU_HUMAN;C9JKR2|C9JKR2_HUMAN;D6RHD5|D6RHD5_HUMAN;B7WNR0|B7WNR0_HUMAN;H0YA55|H0YA55_HUMAN	Oxidation (M)		FALSE
AVMD(+21.98)DFAAFVEK	59.79	1363.61	12	1.6	682.813	2	23.9114	5460000	30400000	5534	20210614_HS_50ng_RAW-6.raw	7	A0A0C4DGB6|A0A0C4DGB6_HUMAN;A0A087WWT3|A0A087WWT3_HUMAN;P02768|ALBU_HUMAN;C9JKR2|C9JKR2_HUMAN;D6RHD5|D6RHD5_HUMAN;B7WNR0|B7WNR0_HUMAN;H0YA55|H0YA55_HUMAN	Sodium adduct	D4:Sodium adduct:14.40	FALSE
AVMDD(+21.98)FAAFVEK	64.31	1363.61	12	-0.7	682.812	2	23.8695	10300000	64700000	5591	20210614_HS_50ng_RAW-5.raw	24	A0A0C4DGB6|A0A0C4DGB6_HUMAN;A0A087WWT3|A0A087WWT3_HUMAN;P02768|ALBU_HUMAN;C9JKR2|C9JKR2_HUMAN;D6RHD5|D6RHD5_HUMAN;B7WNR0|B7WNR0_HUMAN;H0YA55|H0YA55_HUMAN	Sodium adduct	D5:Sodium adduct:0.00	FALSE
AVMDDFAAFVEK	70.29	1341.63	12	-4.5	671.818	2	24.6165	456000000	4710000000	6169	20210614_HS_50ng_RAW-1.raw	326	A0A0C4DGB6|A0A0C4DGB6_HUMAN;A0A087WWT3|A0A087WWT3_HUMAN;P02768|ALBU_HUMAN;C9JKR2|C9JKR2_HUMAN;D6RHD5|D6RHD5_HUMAN;B7WNR0|B7WNR0_HUMAN;H0YA55|H0YA55_HUMAN			FALSE
AVSM(+15.99)PSFSILGSDVR	70.4	1580.79	15	2.3	791.403	2	22.4868	3110000	24700000	5202	20210614_HS_50ng_RAW-5.raw	7	P04114|APOB_HUMAN	Oxidation (M)		FALSE
AYLEEEC(+57.02)PATLR	43.91	1450.68	12	-0.6	726.345	2	17.2359	1810000	17800000	3526	20210614_HS_50ng_RAW-4.raw	15	C9JEV0|C9JEV0_HUMAN;P25311|ZA2G_HUMAN	Carbamidomethylation	C7:Carbamidomethylation:1000.00	FALSE
AYSLFSYNTQGR	60.39	1405.66	12	5.4	703.842	2	19.9623	1110000	13300000	4335	20210614_HS_50ng_RAW-3.raw	13	P02743|SAMP_HUMAN			FALSE
AYYENSPQQVFSTEFEVK	63.79	2165	18	2.4	722.674	3	23.4727	7630000	60200000	5553	20210614_HS_50ng_RAW-12.raw	29	P01024|CO3_HUMAN			FALSE
C(+57.02)C(+57.02)AAADPHEC(+57.02)YAK	59.29	1551.59	13	-3.1	518.202	3	4.0704	4930000	15500000	831	20210614_HS_50ng_RAW-1.raw	48	A0A0C4DGB6|A0A0C4DGB6_HUMAN;A0A087WWT3|A0A087WWT3_HUMAN;P02768|ALBU_HUMAN;C9JKR2|C9JKR2_HUMAN;D6RHD5|D6RHD5_HUMAN;B7WNR0|B7WNR0_HUMAN;H0YA55|H0YA55_HUMAN	Carbamidomethylation; Carbamidomethylation; Carbamidomethylation	C1:Carbamidomethylation:1000.00;C2:Carbamidomethylation:1000.00;C10:Carbamidomethylation:1000.00	FALSE
C(+57.02)C(+57.02)TESLVNR	73.31	1137.49	9	0.4	569.753	2	5.4452	100000000	369000000	1597	20210614_HS_50ng_RAW-8.raw	154	A0A0C4DGB6|A0A0C4DGB6_HUMAN;#CONTAM#cont|000097|;#CONTAM#cont|000035|;A0A087WWT3|A0A087WWT3_HUMAN;P02768|ALBU_HUMAN;#CONTAM#cont|000017|;C9JKR2|C9JKR2_HUMAN;D6RHD5|D6RHD5_HUMAN;B7WNR0|B7WNR0_HUMAN;H0YA55|H0YA55_HUMAN	Carbamidomethylation; Carbamidomethylation	C1:Carbamidomethylation:1000.00;C2:Carbamidomethylation:1000.00	FALSE
C(+57.02)C(+57.02)VEC(+57.02)PPC(+57.02)PAPPVAGPSVFLFPPKPK	46.69	2907.39	26	-0.9	970.138	3	26.3919	1040000	4110000	6269	20210614_HS_50ng_RAW-7.raw	6	P01859|IGHG2_HUMAN;A0A286YEY4|A0A286YEY4_HUMAN	Carbamidomethylation; Carbamidomethylation; Carbamidomethylation; Carbamidomethylation	C1:Carbamidomethylation:1000.00;C2:Carbamidomethylation:1000.00;C5:Carbamidomethylation:1000.00;C8:Carbamidomethylation:1000.00	FALSE
C(+57.02)DEWSVN(+0.98)SVGK	34.75	1280.53	11	8.3	641.28	2	13.8529	29700	239000	2911	20210614_HS_50ng_RAW-1.raw	1	P02787|TRFE_HUMAN	Carbamidomethylation; Deamidation (NQ)	C1:Carbamidomethylation:1000.00	FALSE
C(+57.02)DEWSVNSVGK	65.7	1279.55	11	0.5	640.783	2	14.3065	13000000	47800000	2693	20210614_HS_50ng_RAW-3.raw	48	P02787|TRFE_HUMAN	Carbamidomethylation	C1:Carbamidomethylation:1000.00	FALSE
C(+57.02)PNPPVQENFDVNK	47.33	1656.76	14	-1.3	829.385	2	16.7542	454000	4670000	3325	20210614_HS_50ng_RAW-6.raw	10	C9JX71|C9JX71_HUMAN;P05090|APOD_HUMAN;C9JF17|C9JF17_HUMAN	Carbamidomethylation	C1:Carbamidomethylation:1000.00	FALSE
C(+57.02)STSSLLEAC(+57.02)TFR	70.64	1530.68	13	3.7	766.351	2	19.9377	2090000	23500000	4357	20210614_HS_50ng_RAW-5.raw	15	P02787|TRFE_HUMAN	Carbamidomethylation; Carbamidomethylation	C1:Carbamidomethylation:1000.00;C10:Carbamidomethylation:1000.00	FALSE
C(+57.02)SYTEDAQC(+57.02)IDGTIEVPK	53.22	2084.9	18	2.3	1043.46	2	19.9797	207000	2860000	4347	20210614_HS_50ng_RAW-8.raw	5	P02749|APOH_HUMAN	Carbamidomethylation; Carbamidomethylation	C1:Carbamidomethylation:1000.00;C9:Carbamidomethylation:1000.00	FALSE
C(+57.02)TSTGWIPAPR	53.05	1244.6	11	-0.3	623.306	2	18.1523	415000	2770000	3804	20210614_HS_50ng_RAW-14.raw	9	A0A0D9SG88|A0A0D9SG88_HUMAN;P08603|CFAH_HUMAN;Q5TFM2|Q5TFM2_HUMAN	Carbamidomethylation	C1:Carbamidomethylation:1000.00	FALSE
D(+21.98)IQMTQSPSSLSASVGDR	24.73	1899.86	18	-1.8	634.293	3	18.4917	505000	4480000	3898	20210614_HS_50ng_RAW-5.raw	2	A0A2Q2TTZ9|A0A2Q2TTZ9_HUMAN	Sodium adduct	D1:Sodium adduct:46.76	FALSE
DADPDTFFAK	54.79	1125.5	10	2.9	563.758	2	16.2623	91100	563000	3512	20210614_HS_50ng_RAW-1.raw	1	P43652|AFAM_HUMAN			FALSE
DAEAWFNEK	43.12	1108.48	9	1.1	555.249	2	16.969	77300	553000	3565	20210614_HS_50ng_RAW-10.raw	2	#CONTAM#cont|000133|;P13645|K1C10_HUMAN;#CONTAM#cont|000129|;#CONTAM#cont|000136|;#CONTAM#cont|000122|;#CONTAM#cont|000130|			FALSE
DALSSVQ(+0.98)ESQVAQQAR	40	1716.83	16	9.1	573.288	3	15.9095	17600	224000	3161	20210614_HS_50ng_RAW-7.raw	1	P02656|APOC3_HUMAN;B0YIW2|B0YIW2_HUMAN	Deamidation (NQ)	Q7:Deamidation (NQ):38.16	FALSE
DALSSVQESQVAQQAR	70.04	1715.84	16	-0.9	858.928	2	15.9041	1720000	18500000	3122	20210614_HS_50ng_RAW-5.raw	30	P02656|APOC3_HUMAN;B0YIW2|B0YIW2_HUMAN			FALSE
DASGATFTWTPSSGK	79.43	1511.69	15	1.5	756.853	2	18.3986	9080000	50600000	3879	20210614_HS_50ng_RAW-4.raw	15				FALSE
DASGVTFTWTPSSGK	73.88	1539.72	15	0.5	770.868	2	20.2778	17700000	238000000	4473	20210614_HS_50ng_RAW-5.raw	42	P01876|IGHA1_HUMAN;A0A286YEY1|A0A286YEY1_HUMAN			FALSE
DAVEKPQEFTIVAFVK	32.74	1819.97	16	3.8	607.667	3	24.822	17900	354000	5878	20210614_HS_50ng_RAW-9.raw	6	P04114|APOB_HUMAN			FALSE
DC(+57.02)HLAQVPSHTVVAR	75.82	1688.84	15	0.1	563.955	3	12.8013	46000000	304000000	2660	20210614_HS_50ng_RAW-1.raw	64	P02787|TRFE_HUMAN	Carbamidomethylation	C2:Carbamidomethylation:1000.00	FALSE
DD(+21.98)NPNLPR	47.33	961.423	8	-1.9	481.718	2	5.2332	79700000	169000000	964	20210614_HS_50ng_RAW-15.raw	49	A0A0C4DGB6|A0A0C4DGB6_HUMAN;A0A087WWT3|A0A087WWT3_HUMAN;P02768|ALBU_HUMAN;H7C013|H7C013_HUMAN	Sodium adduct	D2:Sodium adduct:14.02	FALSE
DDLYVSDAFHK	66.89	1308.6	11	-1.9	437.206	3	17.392	2570000	27900000	3500	20210614_HS_50ng_RAW-6.raw	21	P01008|ANT3_HUMAN			FALSE
DDNPNLPR	59.24	939.441	8	-0.8	470.727	2	11.1474	459000000	2450000000	2190	20210614_HS_50ng_RAW-15.raw	256	A0A0C4DGB6|A0A0C4DGB6_HUMAN;A0A087WWT3|A0A087WWT3_HUMAN;P02768|ALBU_HUMAN;H7C013|H7C013_HUMAN			FALSE
DDTVC(+57.02)LAK	46.89	920.427	8	-7.5	461.217	2	4.6959	5200000	35200000	904	20210614_HS_50ng_RAW-1.raw	76	P02787|TRFE_HUMAN	Carbamidomethylation	C5:Carbamidomethylation:1000.00	FALSE
DEELSC(+57.02)TVVELK	64.67	1420.68	12	2.5	711.347	2	19.0951	705000	8500000	4050	20210614_HS_50ng_RAW-8.raw	11	G3V595|G3V595_HUMAN;G3V3A0|G3V3A0_HUMAN;P01011|AACT_HUMAN	Carbamidomethylation	C6:Carbamidomethylation:1000.00	FALSE
DELTKNQVSLTC(+57.02)LVK	36.21	1746.92	15	5.3	583.317	3	21.1542	7460	197000	4779	20210614_HS_50ng_RAW-9.raw	2	P01857|IGHG1_HUMAN;A0A0A0MS08|A0A0A0MS08_HUMAN;A0A0A0MS07|A0A0A0MS07_HUMAN	Carbamidomethylation	C12:Carbamidomethylation:1000.00	FALSE
DFDFVPPVVR	72.23	1189.61	10	0	595.814	2	24.0103	29300000	188000000	5542	20210614_HS_50ng_RAW-3.raw	24	P01024|CO3_HUMAN			FALSE
DFSLWEK	42.77	923.439	7	-2.6	462.726	2	20.2594	315000	2510000	4440	20210614_HS_50ng_RAW-8.raw	8	P04114|APOB_HUMAN			FALSE
DFVQPPTK	43.65	930.481	8	-3	466.246	2	6.4368	107000	851000	1277	20210614_HS_50ng_RAW-1.raw	4	P01042|KNG1_HUMAN			FALSE
DGAGDVAFVK	63.75	977.482	10	-1.4	489.748	2	10.3778	69300000	299000000	1967	20210614_HS_50ng_RAW-3.raw	189	C9JVG0|C9JVG0_HUMAN;P02787|TRFE_HUMAN			FALSE
DGFFGNPR	42.59	908.414	8	-2.6	455.213	2	12.4038	2480000	2620000	2418	20210614_HS_50ng_RAW-11.raw	12	P01871|IGHM_HUMAN			FALSE
DGSPDVTTADIGANTPDATK	41.04	1944.89	20	-0.7	973.452	2	16.0174	205000	2800000	3191	20210614_HS_50ng_RAW-14.raw	6	Q96PD5|PGRP2_HUMAN			FALSE
DGWSAQPTC(+57.02)IK	44.3	1261.58	11	-0.4	631.795	2	14.9733	983000	4800000	2882	20210614_HS_50ng_RAW-15.raw	11	P08603|CFAH_HUMAN	Carbamidomethylation	C9:Carbamidomethylation:1000.00	FALSE
DGYLFQLLR	63.96	1123.6	9	4.4	562.811	2	26.0305	2250000	16300000	6088	20210614_HS_50ng_RAW-8.raw	15	P04196|HRG_HUMAN			FALSE
DHAVDLIQK	42.72	1037.55	9	0	519.783	2	7.0324	414000	1420000	1313	20210614_HS_50ng_RAW-3.raw	13				FALSE
DIAPTLTLYVGK	63.69	1289.72	12	-7.4	645.864	2	22.8643	30500000	296000000	5249	20210614_HS_50ng_RAW-8.raw	32	P00738|HPT_HUMAN;J3QLC9|J3QLC9_HUMAN;H3BS21|H3BS21_HUMAN;A0A087WU08|A0A087WU08_HUMAN;H0Y300|H0Y300_HUMAN;A0A0C4DGL8|A0A0C4DGL8_HUMAN;J3QR68|J3QR68_HUMAN			FALSE
DIASGLIGPLIIC(+57.02)K	77.51	1468.83	14	1.2	735.424	2	26.662	1780000	14300000	6278	20210614_HS_50ng_RAW-4.raw	15	E9PFZ2|E9PFZ2_HUMAN;P00450|CERU_HUMAN	Carbamidomethylation	C13:Carbamidomethylation:1000.00	FALSE
DIC(+57.02)EEQVN(+0.98)SLPGSITK	38.46	1789.84	16	1.8	895.929	2	18.6111	122000	1280000	4030	20210614_HS_50ng_RAW-11.raw	3	M0R0Q9|M0R0Q9_HUMAN;P01024|CO3_HUMAN	Carbamidomethylation; Deamidation (NQ)	C3:Carbamidomethylation:1000.00;N8:Deamidation (NQ):32.28	FALSE
DIC(+57.02)EEQVNSLPGSITK	82.66	1788.86	16	0.9	895.436	2	18.7653	16400000	142000000	4274	20210614_HS_50ng_RAW-1.raw	28	M0R0Q9|M0R0Q9_HUMAN;P01024|CO3_HUMAN	Carbamidomethylation	C3:Carbamidomethylation:1000.00	FALSE
DIFTGLIGPM(+15.99)K	50.42	1206.63	11	4.8	604.326	2	22.987	1990000	13300000	5484	20210614_HS_50ng_RAW-13.raw	18	E9PFZ2|E9PFZ2_HUMAN;H7C5R1|H7C5R1_HUMAN;P00450|CERU_HUMAN	Oxidation (M)		FALSE
DIFTGLIGPMK	64.38	1190.64	11	2	596.327	2	25.3128	3870000	29800000	5858	20210614_HS_50ng_RAW-3.raw	15	E9PFZ2|E9PFZ2_HUMAN;H7C5R1|H7C5R1_HUMAN;P00450|CERU_HUMAN			FALSE
DINYVNPVIK	27.38	1173.64	10	2.4	587.828	2	18.5949	85600	924000	4297	20210614_HS_50ng_RAW-1.raw	1	P01031|CO5_HUMAN			FALSE
DIPMNPMC(+57.02)IYR	39.55	1408.63	11	4.6	705.326	2	22.5249	320000	3400000	5167	20210614_HS_50ng_RAW-8.raw	8	P01008|ANT3_HUMAN;Q8TCE1|Q8TCE1_HUMAN	Carbamidomethylation	C8:Carbamidomethylation:1000.00	FALSE
DIPTN(+0.98)SPELEETLTHTITK	46.72	2139.06	19	-6	714.022	3	22.9228	24700	548000	5423	20210614_HS_50ng_RAW-11.raw	2	P01042|KNG1_HUMAN	Deamidation (NQ)		FALSE
DIPTNSPELEETLTHTITK	74.4	2138.07	19	-10	713.692	3	22.8316	3490000	39400000	5248	20210614_HS_50ng_RAW-8.raw	6	P01042|KNG1_HUMAN			FALSE
DIQM(+15.99)TQ(+0.98)SPSSLSASVGDR	35.47	1894.86	18	7.1	948.443	2	16.1062			3234	20210614_HS_50ng_RAW-7.raw	1	A0A2Q2TTZ9|A0A2Q2TTZ9_HUMAN	Oxidation (M); Deamidation (NQ)	M4:Oxidation (M):1000.00;Q6:Deamidation (NQ):28.36	FALSE
DIQM(+15.99)TQSPSSLSASVGDR	66.02	1893.87	18	1.2	947.945	2	16.2041	3830000	29100000	3170	20210614_HS_50ng_RAW-6.raw	36	A0A2Q2TTZ9|A0A2Q2TTZ9_HUMAN	Oxidation (M)		FALSE
DIQMTQSPSSLSASVGDR	78.88	1877.88	18	0.1	939.947	2	18.5363	23200000	218000000	3920	20210614_HS_50ng_RAW-4.raw	30	A0A2Q2TTZ9|A0A2Q2TTZ9_HUMAN			FALSE
DISEVVTPR	44.36	1014.53	9	-0.7	508.274	2	7.9243	1510000	2660000	1726	20210614_HS_50ng_RAW-1.raw	11	H7C5H1|H7C5H1_HUMAN;E7ETN3|E7ETN3_HUMAN;P00751|CFAB_HUMAN;B4E1Z4|B4E1Z4_HUMAN			FALSE
DIVMTQ(+0.98)SPLSLPVTPGEPASISC(+57.02)R	38.19	2555.26	24	4.9	852.765	3	25.7517	33700	725000	6124	20210614_HS_50ng_RAW-7.raw	1		Deamidation (NQ); Carbamidomethylation	C23:Carbamidomethylation:1000.00	FALSE
DIVMTQSPLSLPVTPGEPASISC(+57.02)R	52.76	2554.28	24	1.5	852.434	3	25.6874	553000	8110000	6179	20210614_HS_50ng_RAW-13.raw	11		Carbamidomethylation	C23:Carbamidomethylation:1000.00	FALSE
DKDQEVLLQTFLDDASPGDK	63.2	2233.07	20	2.3	745.367	3	26.0741	452000	6130000	6075	20210614_HS_50ng_RAW-6.raw	12	A8MUN2|A8MUN2_HUMAN;P04114|APOB_HUMAN			FALSE
DLATVYVDVLK	63.07	1234.68	11	0.7	618.348	2	23.8874	11400000	96300000	5580	20210614_HS_50ng_RAW-5.raw	15	P02647|APOA1_HUMAN			FALSE
DLC(+57.02)GC(+57.02)YSVSSVLPGC(+57.02)AEPWNHGK	66.04	2592.12	23	2.6	865.049	3	23.6176	1570000	16700000	5523	20210614_HS_50ng_RAW-4.raw	11	P01876|IGHA1_HUMAN;A0A286YEY1|A0A286YEY1_HUMAN	Carbamidomethylation; Carbamidomethylation; Carbamidomethylation	C3:Carbamidomethylation:1000.00;C5:Carbamidomethylation:1000.00;C15:Carbamidomethylation:1000.00	FALSE
DLGEE(+21.98)NFK	42.1	972.416	8	-1.5	487.215	2	6.7602	29300000	64700000	1315	20210614_HS_50ng_RAW-15.raw	25	A0A0C4DGB6|A0A0C4DGB6_HUMAN;A0A087WWT3|A0A087WWT3_HUMAN;P02768|ALBU_HUMAN;H7C013|H7C013_HUMAN;C9JKR2|C9JKR2_HUMAN;B7WNR0|B7WNR0_HUMAN	Sodium adduct	E5:Sodium adduct:7.21	FALSE
DLGEENFK	49.53	950.434	8	-6.9	476.221	2	12.5512	318000000	2360000000	2506	20210614_HS_50ng_RAW-13.raw	267	A0A0C4DGB6|A0A0C4DGB6_HUMAN;A0A087WWT3|A0A087WWT3_HUMAN;P02768|ALBU_HUMAN;H7C013|H7C013_HUMAN;C9JKR2|C9JKR2_HUMAN;B7WNR0|B7WNR0_HUMAN			FALSE
DLKVEDIPLAR	28.84	1267.71	11	-1.6	423.578	3	20.1173			4446	20210614_HS_50ng_RAW-9.raw	1	P04114|APOB_HUMAN			FALSE
DLLFRDDTVC(+57.02)LAK	49.25	1564.79	13	1.5	522.605	3	22.0544	3230000	32900000	4986	20210614_HS_50ng_RAW-6.raw	21	P02787|TRFE_HUMAN	Carbamidomethylation	C10:Carbamidomethylation:1000.00	FALSE
DLTGFPGPLN(+0.98)DQDN(+0.98)EDC(+57.02)INR	64.96	2290.96	20	4.9	1146.5	2	21.6836			4859	20210614_HS_50ng_RAW-15.raw	3	P01023|A2MG_HUMAN	Deamidation (NQ); Deamidation (NQ); Carbamidomethylation	N10:Deamidation (NQ):11.10;N14:Deamidation (NQ):26.31;C17:Carbamidomethylation:1000.00	FALSE
DLTGFPGPLND(+21.98)QDN(+0.98)EDC(+57.02)INR	43.9	2311.96	20	3.8	771.664	3	21.5957	36200	442000	5241	20210614_HS_50ng_RAW-1.raw	1	P01023|A2MG_HUMAN	Sodium adduct; Deamidation (NQ); Carbamidomethylation	D11:Sodium adduct:4.34;N14:Deamidation (NQ):22.85;C17:Carbamidomethylation:1000.00	FALSE
DLTGFPGPLNDQ(+0.98)DNEDC(+57.02)INR	26.44	2289.98	20	3.8	1146	2	22.22	170000	1370000	4809	20210614_HS_50ng_RAW-2.raw	1	P01023|A2MG_HUMAN	Deamidation (NQ); Carbamidomethylation	Q12:Deamidation (NQ):0.00;C17:Carbamidomethylation:1000.00	FALSE
DLTGFPGPLNDQDN(+0.98)EDC(+57.02)INR	88.44	2289.98	20	1.4	1146	2	21.7868	4950000	37100000	4953	20210614_HS_50ng_RAW-5.raw	23	P01023|A2MG_HUMAN	Deamidation (NQ); Carbamidomethylation	N14:Deamidation (NQ):32.28;C17:Carbamidomethylation:1000.00	FALSE
DM(+15.99)YSFLEDMGLK	54.62	1463.63	12	5.6	732.827	2	25.1133	105000	950000	6016	20210614_HS_50ng_RAW-11.raw	2	P01023|A2MG_HUMAN	Oxidation (M)	M2:Oxidation (M):119.46	FALSE
DMYSFLEDM(+15.99)GLK	50.15	1463.63	12	2.8	732.825	2	23.6808	346000	4460000	5903	20210614_HS_50ng_RAW-1.raw	14	P01023|A2MG_HUMAN	Oxidation (M)	M9:Oxidation (M):52.22	FALSE
DNELLVYK	50.06	992.518	8	-1.9	497.265	2	15.8399	741000	3790000	3226	20210614_HS_50ng_RAW-13.raw	12	P02743|SAMP_HUMAN			FALSE
DNVFDGLVR	59.38	1033.52	9	1.8	517.768	2	20.0538	1270000	12500000	4362	20210614_HS_50ng_RAW-8.raw	15	P04114|APOB_HUMAN			FALSE
DPTFIPAPIQAK	80.2	1296.71	12	2.9	649.363	2	20.828	4690000	40900000	4602	20210614_HS_50ng_RAW-8.raw	15	P01019|ANGT_HUMAN			FALSE
DQYELLC(+57.02)LDNTR	69.99	1538.7	12	0.8	770.36	2	20.9389	14500000	117000000	4675	20210614_HS_50ng_RAW-5.raw	18	C9JVG0|C9JVG0_HUMAN;P02787|TRFE_HUMAN	Carbamidomethylation	C7:Carbamidomethylation:1000.00	FALSE
DSAHGFLK	38.8	873.434	8	-4.6	437.723	2	5.6485	68100	271000	975	20210614_HS_50ng_RAW-8.raw	9	P02787|TRFE_HUMAN			FALSE
DSC(+57.02)VGSLVVK	51.41	1062.54	10	-2.1	532.275	2	13.693	6120000	14700000	2616	20210614_HS_50ng_RAW-4.raw	19	P01024|CO3_HUMAN	Carbamidomethylation	C3:Carbamidomethylation:1000.00	FALSE
DSGFQM(+15.99)NQLR	52.91	1210.54	10	-0.5	606.277	2	14.3775	42600000	65800000	2631	20210614_HS_50ng_RAW-5.raw	124	P02787|TRFE_HUMAN	Oxidation (M)		FALSE
DSGFQMNQLR	67.1	1194.55	10	1.2	598.281	2	16.1794	19200000	102000000	3341	20210614_HS_50ng_RAW-15.raw	34	P02787|TRFE_HUMAN			FALSE
DSGRDYVSQFEGSALGK	56.08	1814.84	17	-0.2	605.955	3	19.5784	553000	6430000	4228	20210614_HS_50ng_RAW-8.raw	12	P02647|APOA1_HUMAN			FALSE
DSPVLIDFFEDTER	65.15	1681.78	14	4.1	841.903	2	27.5163	1340000	10600000	6448	20210614_HS_50ng_RAW-4.raw	14	P04196|HRG_HUMAN			FALSE
DSTYSLSSTLTLSK	73.85	1501.75	14	-3.1	751.88	2	20.1341	116000000	858000000	4738	20210614_HS_50ng_RAW-1.raw	69	A0A5H1ZRQ3|A0A5H1ZRQ3_HUMAN;P01834|IGKC_HUMAN			FALSE
DTEEEDFHVDQATTVK	65.45	1862.82	16	-0.3	932.415	2	15.8054	55300000	419000000	3067	20210614_HS_50ng_RAW-8.raw	42				FALSE
DTEEEDFHVDQVTTVK	83.72	1890.85	16	0.6	946.432	2	17.7972	78200000	714000000	3638	20210614_HS_50ng_RAW-8.raw	37				FALSE
DTLMISR	34.92	834.427	7	-4.2	418.219	2	7.8254	29200000	68400000	1518	20210614_HS_50ng_RAW-8.raw	29	P01859|IGHG2_HUMAN;A0A4W9A917|A0A4W9A917_HUMAN;P01857|IGHG1_HUMAN;P01860|IGHG3_HUMAN;A0A286YEY4|A0A286YEY4_HUMAN;A0A0A0MS08|A0A0A0MS08_HUMAN;A0A0A0MS07|A0A0A0MS07_HUMAN;A0A286YES1|A0A286YES1_HUMAN			FALSE
DTSC(+57.02)VNPPTVQNAYIVSR	39.59	2019.97	18	1.3	674.331	3	19.2004	528000	5730000	4130	20210614_HS_50ng_RAW-5.raw	12	P08603|CFAH_HUMAN	Carbamidomethylation	C4:Carbamidomethylation:1000.00	FALSE
DTSISTAYMELSR	49.95	1472.68	13	3.4	737.351	2	20.4367	49300	960000	4596	20210614_HS_50ng_RAW-7.raw	3				FALSE
DTVIKPLLVEPEGLEK	75.63	1779	16	2.4	890.511	2	23.2043	25500000	222000000	5389	20210614_HS_50ng_RAW-5.raw	32	P01023|A2MG_HUMAN			FALSE
DTWVEHWPEEDEC(+57.02)QDEENQK	91.8	2602.02	20	0.3	868.345	3	20.1234	11500000	88900000	4275	20210614_HS_50ng_RAW-2.raw	16	P01024|CO3_HUMAN	Carbamidomethylation	C13:Carbamidomethylation:1000.00	FALSE
DVFLGM(+15.99)FLYEYAR	65.11	1638.78	13	3.9	820.398	2	28.4199	3870000	17800000	6574	20210614_HS_50ng_RAW-5.raw	14	A0A0C4DGB6|A0A0C4DGB6_HUMAN;P02768|ALBU_HUMAN;C9JKR2|C9JKR2_HUMAN;D6RHD5|D6RHD5_HUMAN;B7WNR0|B7WNR0_HUMAN;H0YA55|H0YA55_HUMAN	Oxidation (M)		FALSE
DVVLFEK	35.65	848.464	7	-2.4	425.238	2	15.6771	103000	255000	3410	20210614_HS_50ng_RAW-1.raw	1	P00747|PLMN_HUMAN			FALSE
DVWGIEGPIDAAFTR	63.31	1645.81	15	2.8	823.915	2	26.5828	3610000	21700000	6213	20210614_HS_50ng_RAW-8.raw	15	P04004|VTNC_HUMAN			FALSE
DWHGVPGQVDAAM(+15.99)AGR	30.93	1681.76	16	2.2	561.596	3	16.9462	129000	1280000	3385	20210614_HS_50ng_RAW-3.raw	4	P04004|VTNC_HUMAN	Oxidation (M)		FALSE
DWHGVPGQVDAAMAGR	59.3	1665.77	16	1	556.264	3	19.4135	1630000	26500000	4342	20210614_HS_50ng_RAW-13.raw	21	P04004|VTNC_HUMAN			FALSE
DYAGVFSDAGLTFTSSSGQQTAQR	69.36	2493.14	24	1.5	832.056	3	23.6126	83300	1020000	5440	20210614_HS_50ng_RAW-3.raw	1	P01024|CO3_HUMAN			FALSE
DYELLC(+57.02)LDGTR	58.27	1353.62	11	-1.3	677.818	2	21.0529	1510000	13200000	4647	20210614_HS_50ng_RAW-6.raw	23	P02787|TRFE_HUMAN	Carbamidomethylation	C6:Carbamidomethylation:1000.00	FALSE
DYFM(+15.99)PC(+57.02)PGR	53.08	1157.46	9	0.3	579.739	2	14.1164	6730000	16900000	3029	20210614_HS_50ng_RAW-1.raw	43	P02790|HEMO_HUMAN;Q9BS19|Q9BS19_HUMAN	Oxidation (M); Carbamidomethylation	C6:Carbamidomethylation:1000.00	FALSE
DYVSQFEGSALGK	77.33	1399.66	13	1.1	700.839	2	19.8922	6980000	107000000	4374	20210614_HS_50ng_RAW-4.raw	36	P02647|APOA1_HUMAN			FALSE
E(-18.01)DPQ(+0.98)TFYYAVAVVK	34.69	1611.78	14	7.1	806.904	2	25.2587	67800	595000	5850	20210614_HS_50ng_RAW-3.raw	2	P02787|TRFE_HUMAN	Pyro-glu from E; Deamidation (NQ)		FALSE
E(-18.01)DPQTFYYAVAVVK	55.67	1610.8	14	2.7	806.408	2	25.1611	232000	2540000	6067	20210614_HS_50ng_RAW-10.raw	6	P02787|TRFE_HUMAN	Pyro-glu from E		FALSE
E(-18.01)FQLFSSPHGK	65.71	1257.61	11	0.9	629.815	2	22.0398	2890000	24500000	4971	20210614_HS_50ng_RAW-6.raw	16	P02787|TRFE_HUMAN	Pyro-glu from E		FALSE
E(-18.01)GYYGYTGAFR	32.52	1264.55	11	0.3	633.283	2	19.9526	70600	884000	4390	20210614_HS_50ng_RAW-9.raw	4	H7C5E8|H7C5E8_HUMAN;P02787|TRFE_HUMAN	Pyro-glu from E		FALSE
E(-18.01)HAVEGDC(+57.02)DFQLLK	35.27	1641.75	14	2.5	821.882	2	20.6067	36900	508000	4672	20210614_HS_50ng_RAW-11.raw	1	P02765|FETUA_HUMAN;C9JV77|C9JV77_HUMAN	Pyro-glu from E; Carbamidomethylation	C8:Carbamidomethylation:1000.00	FALSE
E(-18.01)PQVYTLPPSR	44.16	1267.66	11	5.2	634.839	2	18.4537	692000	5750000	3886	20210614_HS_50ng_RAW-3.raw	17	P01859|IGHG2_HUMAN;A0A4W9A917|A0A4W9A917_HUMAN;P01857|IGHG1_HUMAN;P01860|IGHG3_HUMAN;A0A286YEY4|A0A286YEY4_HUMAN;A0A0A0MS08|A0A0A0MS08_HUMAN;A0A0A0MS07|A0A0A0MS07_HUMAN;A0A286YES1|A0A286YES1_HUMAN	Pyro-glu from E		FALSE
E(-18.01)TYGEMADC(+57.02)C(+57.02)AK	46.47	1415.52	12	1.2	708.766	2	7.6913	78300	1950000	1481	20210614_HS_50ng_RAW-14.raw	8	A0A0C4DGB6|A0A0C4DGB6_HUMAN;A0A087WWT3|A0A087WWT3_HUMAN;P02768|ALBU_HUMAN;H7C013|H7C013_HUMAN	Pyro-glu from E; Carbamidomethylation; Carbamidomethylation	C9:Carbamidomethylation:1000.00;C10:Carbamidomethylation:1000.00	FALSE
E(-18.01)VQLVESGGGLVQPGGSLR	79.24	1862.98	19	1.3	932.501	2	23.1839	1280000	13700000	5745	20210614_HS_50ng_RAW-1.raw	15		Pyro-glu from E		FALSE
EAGIPEFYDYDVALIK	58.02	1841.91	16	0.9	921.962	2	26.7989	2210000	16900000	6192	20210614_HS_50ng_RAW-3.raw	14	H7C5H1|H7C5H1_HUMAN;E7ETN3|E7ETN3_HUMAN;P00751|CFAB_HUMAN;A0A0G2JH38|A0A0G2JH38_HUMAN;B4E1Z4|B4E1Z4_HUMAN			FALSE
EAQLPVIENK	50.9	1139.62	10	1.2	570.817	2	15.7866	6420000	22100000	3066	20210614_HS_50ng_RAW-8.raw	16	P00747|PLMN_HUMAN			FALSE
EDIFMETLK	50.33	1124.54	9	5.6	563.282	2	21.0539	382000	4100000	4665	20210614_HS_50ng_RAW-6.raw	8	C9JEV0|C9JEV0_HUMAN;P25311|ZA2G_HUMAN			FALSE
EDIPPADLSD(+21.98)QVPDTESETR	55.19	2234.98	20	-0.1	746	3	18.4179	23600	406000	4168	20210614_HS_50ng_RAW-1.raw	1	P01024|CO3_HUMAN	Sodium adduct	D10:Sodium adduct:0.00	FALSE
EDIPPADLSDQVPDTESETR	58.34	2213	20	1.6	738.674	3	18.7045	17300000	58300000	3941	20210614_HS_50ng_RAW-4.raw	41	P01024|CO3_HUMAN			FALSE
EDPQTFYYAVAVVK	75.27	1628.81	14	-1.9	815.41	2	23.3277	63900000	832000000	5430	20210614_HS_50ng_RAW-4.raw	59	P02787|TRFE_HUMAN			FALSE
EDVYVVGTVLR	76.98	1248.67	11	1.7	625.344	2	20.7517	2710000	26800000	4617	20210614_HS_50ng_RAW-5.raw	8	P04003|C4BPA_HUMAN			FALSE
EELLPAQDIK	60.62	1154.62	10	3.4	578.318	2	16.7705	2240000	12200000	3655	20210614_HS_50ng_RAW-1.raw	3	H7C5H1|H7C5H1_HUMAN;E7ETN3|E7ETN3_HUMAN;P00751|CFAB_HUMAN;B4E1Z4|B4E1Z4_HUMAN			FALSE
EENFYVDETTVVK	66.02	1571.74	13	0.9	786.876	2	19.0283	1100000	13500000	4032	20210614_HS_50ng_RAW-8.raw	15	P08185|CBG_HUMAN			FALSE
EFNAETFTFHADIC(+57.02)TLSEK	77.22	2259.02	19	-6.6	754.007	3	24.6838	10900000	75400000	5703	20210614_HS_50ng_RAW-3.raw	17	A0A0C4DGB6|A0A0C4DGB6_HUMAN;A0A087WWT3|A0A087WWT3_HUMAN;P02768|ALBU_HUMAN;C9JKR2|C9JKR2_HUMAN;D6RHD5|D6RHD5_HUMAN;B7WNR0|B7WNR0_HUMAN;H0YA55|H0YA55_HUMAN	Carbamidomethylation	C14:Carbamidomethylation:1000.00	FALSE
EFQLFSSPHGK	68.86	1275.62	11	1.8	638.821	2	19.0204	25200000	120000000	4045	20210614_HS_50ng_RAW-5.raw	38	P02787|TRFE_HUMAN			FALSE
EFQVPTFTIPK	52.91	1305.7	11	2.3	653.857	2	24.9157	4520000	35200000	5818	20210614_HS_50ng_RAW-8.raw	14	P04114|APOB_HUMAN			FALSE
EFTPPVQAAYQK	64.86	1377.69	12	-0.8	689.853	2	17.4428	1290000	14500000	3564	20210614_HS_50ng_RAW-5.raw	15	P68871|HBB_HUMAN			FALSE
EGTC(+57.02)PEAPTDEC(+57.02)KPVK	66.37	1816.8	16	-1.8	606.605	3	5.7319	38500000	123000000	1012	20210614_HS_50ng_RAW-8.raw	45	P02787|TRFE_HUMAN	Carbamidomethylation; Carbamidomethylation	C4:Carbamidomethylation:1000.00;C12:Carbamidomethylation:1000.00	FALSE
EGVQKEDIPPADLSDQVPDTESETR	53.47	2754.28	25	0.4	919.102	3	18.8326	7740000	19000000	4016	20210614_HS_50ng_RAW-12.raw	10	P01024|CO3_HUMAN			FALSE
EGYYGYTGAFR	61.54	1282.56	11	1.2	642.289	2	19.0346	56100000	261000000	4008	20210614_HS_50ng_RAW-6.raw	102	H7C5E8|H7C5E8_HUMAN;P02787|TRFE_HUMAN			FALSE
EHAVEGDC(+57.02)DFQLLK	77.23	1659.76	14	3.4	554.261	3	19.3932	7770000	81100000	4181	20210614_HS_50ng_RAW-5.raw	27	P02765|FETUA_HUMAN;C9JV77|C9JV77_HUMAN	Carbamidomethylation	C8:Carbamidomethylation:1000.00	FALSE
EHSSLAFWK	48.98	1103.54	9	1.7	552.778	2	18.9547	146000	2620000	4175	20210614_HS_50ng_RAW-10.raw	8	J3KS17|J3KS17_HUMAN;P02749|APOH_HUMAN			FALSE
EIETYHNLLEGGQEDFESSGAGK	88.38	2509.12	23	3.1	837.385	3	21.0483	5330000	49400000	4703	20210614_HS_50ng_RAW-5.raw	15	K7EQQ3|K7EQQ3_HUMAN;P35527|K1C9_HUMAN			FALSE
EIGELYLPK	49.32	1060.58	9	0.1	531.298	2	20.1458	10400000	98900000	4411	20210614_HS_50ng_RAW-5.raw	16	G3V3A0|G3V3A0_HUMAN;P01011|AACT_HUMAN			FALSE
EILSVDC(+57.02)STNNPSQAK	52.95	1761.82	16	0.3	881.918	2	14.3408	2740000	11400000	2796	20210614_HS_50ng_RAW-12.raw	14	P10909|CLUS_HUMAN;H0YC35|H0YC35_HUMAN	Carbamidomethylation	C7:Carbamidomethylation:1000.00	FALSE
EIM(+15.99)ENYNIALR	56.66	1380.67	11	-0.7	691.342	2	18.5444	277000	3330000	3891	20210614_HS_50ng_RAW-8.raw	8	P08603|CFAH_HUMAN	Oxidation (M)		FALSE
EIMENYNIALR	56.86	1364.68	11	-2.4	683.344	2	20.1148	3890000	35000000	4733	20210614_HS_50ng_RAW-1.raw	15	P08603|CFAH_HUMAN			FALSE
EIPAWVPFDPAAQITK	43.61	1781.94	16	4	891.979	2	27.2917	1400000	10500000	6516	20210614_HS_50ng_RAW-10.raw	8	C9JEV0|C9JEV0_HUMAN;P25311|ZA2G_HUMAN			FALSE
EIVMTQSPPTLSLSPGER	44.13	1940.99	18	8.8	971.51	2	22.0578	116000	1590000	5207	20210614_HS_50ng_RAW-13.raw	3				FALSE
EKLQDEDLGFL	43.73	1305.65	11	-1.4	653.829	2	22.2467	1200000	12800000	5046	20210614_HS_50ng_RAW-3.raw	9	H7C5H1|H7C5H1_HUMAN;E7ETN3|E7ETN3_HUMAN;P00751|CFAB_HUMAN;B4E1Z4|B4E1Z4_HUMAN			FALSE
ELDESLQVAER	53.89	1287.63	11	-0.9	644.822	2	13.8915	6920000	24000000	2890	20210614_HS_50ng_RAW-1.raw	16	H0YAS8|H0YAS8_HUMAN;P10909|CLUS_HUMAN;H0YC35|H0YC35_HUMAN			FALSE
ELLDTVTAPQK	43.8	1213.66	11	-1	607.834	2	16.1121	181000	1540000	3199	20210614_HS_50ng_RAW-5.raw	4	I3L4Z0|I3L4Z0_HUMAN;P36955|PEDF_HUMAN			FALSE
ELSYYSLEDLNNK	57.32	1586.75	13	0.3	794.381	2	20.9127	328000	4790000	5007	20210614_HS_50ng_RAW-1.raw	11	P01031|CO5_HUMAN			FALSE
ELTTEIDNNIEQISSYK	43.71	1995.96	17	2.2	998.991	2	22.4276	336000	5030000	5136	20210614_HS_50ng_RAW-8.raw	9	#CONTAM#cont|000133|;#CONTAM#cont|000131|;P13645|K1C10_HUMAN;#CONTAM#cont|000129|;#CONTAM#cont|000136|;#CONTAM#cont|000122|;#CONTAM#cont|000130|			FALSE
EMSGSPASGIPVK	37.42	1258.62	13	-1.6	630.318	2	13.7509	917000	2810000	2646	20210614_HS_50ng_RAW-9.raw	7				FALSE
EN(+0.98)EGFTVTAEGK	34.98	1281.57	12	-6.3	641.789	2	7.0234	508000	1090000	1535	20210614_HS_50ng_RAW-13.raw	4	P01024|CO3_HUMAN;M0QYC8|M0QYC8_HUMAN	Deamidation (NQ)		FALSE
ENFAGEATLQR	56.5	1234.59	11	2.1	618.306	2	12.9548	1880000	6310000	2464	20210614_HS_50ng_RAW-15.raw	15	P04114|APOB_HUMAN			FALSE
ENFLFLTPDC(+57.02)K	63.46	1382.65	11	0.5	692.335	2	23.3782	3510000	29800000	5353	20210614_HS_50ng_RAW-15.raw	16	P01042|KNG1_HUMAN	Carbamidomethylation	C10:Carbamidomethylation:1000.00	FALSE
EPGLQIWR	41.38	997.534	8	0.5	499.775	2	20.1443	315000	4110000	4393	20210614_HS_50ng_RAW-8.raw	9	A0A0A0MS51|A0A0A0MS51_HUMAN;P06396|GELS_HUMAN;A0A0A0MT01|A0A0A0MT01_HUMAN			FALSE
EPQ(+0.98)VYTLPPSR	34.13	1286.65	11	9.4	644.339	2	17.1029	844000	3950000	3400	20210614_HS_50ng_RAW-3.raw	3	P01859|IGHG2_HUMAN;A0A4W9A917|A0A4W9A917_HUMAN;P01857|IGHG1_HUMAN;P01860|IGHG3_HUMAN;A0A286YEY4|A0A286YEY4_HUMAN;A0A0A0MS08|A0A0A0MS08_HUMAN;A0A0A0MS07|A0A0A0MS07_HUMAN;A0A286YES1|A0A286YES1_HUMAN	Deamidation (NQ)		FALSE
EPQVYTLPPSR	69.18	1285.67	11	-5.8	643.837	2	16.8198	87700000	313000000	3350	20210614_HS_50ng_RAW-15.raw	89	P01859|IGHG2_HUMAN;A0A4W9A917|A0A4W9A917_HUMAN;P01857|IGHG1_HUMAN;P01860|IGHG3_HUMAN;A0A286YEY4|A0A286YEY4_HUMAN;A0A0A0MS08|A0A0A0MS08_HUMAN;A0A0A0MS07|A0A0A0MS07_HUMAN;A0A286YES1|A0A286YES1_HUMAN			FALSE
EPQVYTLPPSRDELTK	55.67	1871.96	16	1.3	624.996	3	18.5056	34700000	122000000	3906	20210614_HS_50ng_RAW-14.raw	18	P01857|IGHG1_HUMAN;A0A0A0MS08|A0A0A0MS08_HUMAN;A0A0A0MS07|A0A0A0MS07_HUMAN			FALSE
EPQVYTLPPSREEMTK	40.48	1903.93	16	4.4	635.655	3	17.7853	29600000	62700000	3611	20210614_HS_50ng_RAW-15.raw	14	P01859|IGHG2_HUMAN;A0A4W9A917|A0A4W9A917_HUMAN;P01860|IGHG3_HUMAN;A0A286YEY4|A0A286YEY4_HUMAN;A0A286YES1|A0A286YES1_HUMAN			FALSE
EQLGEFYEALDC(+57.02)LR	58.67	1741.8	14	1.9	871.908	2	25.9044	649000	8030000	6006	20210614_HS_50ng_RAW-3.raw	14	P02763|A1AG1_HUMAN	Carbamidomethylation	C12:Carbamidomethylation:1000.00	FALSE
EQLGPVTQEFWDNLEK	58.11	1931.93	16	2.9	966.973	2	25.7788	9550000	69000000	6128	20210614_HS_50ng_RAW-12.raw	28	F8W696|F8W696_HUMAN;P02647|APOA1_HUMAN			FALSE
EQLQDM(+15.99)GLVDLFSPEK	52.45	1863.89	16	1.7	932.955	2	25.0739	483000	4080000	5873	20210614_HS_50ng_RAW-8.raw	8	P01008|ANT3_HUMAN	Oxidation (M)		FALSE
EQLQDMGLVDLFSPEK	68.58	1847.9	16	2.8	924.959	2	27.2117	1870000	15100000	6383	20210614_HS_50ng_RAW-4.raw	14	P01008|ANT3_HUMAN			FALSE
EQLSLLDR	37.88	972.524	8	-2	487.268	2	16.7265	11300000	39000000	3340	20210614_HS_50ng_RAW-8.raw	19	G3V595|G3V595_HUMAN;P01011|AACT_HUMAN			FALSE
EQVQSC(+57.02)GPPPELLN(+0.98)GNVK	53.71	1965.95	18	2.6	983.983	2	18.4312	1170000	9300000	3885	20210614_HS_50ng_RAW-5.raw	15	P08603|CFAH_HUMAN	Carbamidomethylation; Deamidation (NQ)	C6:Carbamidomethylation:1000.00;N14:Deamidation (NQ):14.04	FALSE
ESQLPTVM(+15.99)DFR	48.08	1337.63	11	-0.7	669.821	2	18.709	5200000	24900000	4253	20210614_HS_50ng_RAW-1.raw	14	A8MUN2|A8MUN2_HUMAN;P04114|APOB_HUMAN	Oxidation (M)		FALSE
ETAASLLQAGYK	61.85	1250.65	12	2.6	626.334	2	18.2878	1330000	17900000	3780	20210614_HS_50ng_RAW-6.raw	14	P00734|THRB_HUMAN			FALSE
ETC(+57.02)FAEEGK	44.1	1069.44	9	-4.3	535.724	2	4.2751	7410000	8040000	823	20210614_HS_50ng_RAW-1.raw	20	A0A087WWT3|A0A087WWT3_HUMAN;P02768|ALBU_HUMAN;C9JKR2|C9JKR2_HUMAN;D6RHD5|D6RHD5_HUMAN;B7WNR0|B7WNR0_HUMAN;H0YA55|H0YA55_HUMAN	Carbamidomethylation	C3:Carbamidomethylation:1000.00	FALSE
ETLFSVM(+15.99)PGLK	31.98	1236.64	11	0.8	619.329	2	20.8785	55600	479000	4992	20210614_HS_50ng_RAW-1.raw	1	Q14624|ITIH4_HUMAN;B7ZKJ8|B7ZKJ8_HUMAN;H7C0L5|H7C0L5_HUMAN	Oxidation (M)		FALSE
ETLFSVMPGLK	45.88	1220.65	11	5.7	611.335	2	24.4948	2760000	21200000	5815	20210614_HS_50ng_RAW-7.raw	13	Q14624|ITIH4_HUMAN;B7ZKJ8|B7ZKJ8_HUMAN;H7C0L5|H7C0L5_HUMAN			FALSE
ETLLQDFR	45.62	1020.52	8	0.9	511.27	2	19.3758	1520000	11000000	4127	20210614_HS_50ng_RAW-8.raw	9	P02760|AMBP_HUMAN;S4R471|S4R471_HUMAN;S4R3Y4|S4R3Y4_HUMAN			FALSE
ETYGE(+21.98)MADC(+57.02)C(+57.02)AK	59.94	1455.51	12	-9.7	728.754	2	5.9109	235000	2830000	1048	20210614_HS_50ng_RAW-4.raw	10	A0A0C4DGB6|A0A0C4DGB6_HUMAN;A0A087WWT3|A0A087WWT3_HUMAN;P02768|ALBU_HUMAN;H7C013|H7C013_HUMAN	Sodium adduct; Carbamidomethylation; Carbamidomethylation	E5:Sodium adduct:12.33;C9:Carbamidomethylation:1000.00;C10:Carbamidomethylation:1000.00	FALSE
ETYGEM(+15.99)ADC(+57.02)C(+57.02)AK	80.85	1449.52	12	-7	725.763	2	3.7534	35200000	137000000	602	20210614_HS_50ng_RAW-6.raw	127	A0A0C4DGB6|A0A0C4DGB6_HUMAN;A0A087WWT3|A0A087WWT3_HUMAN;P02768|ALBU_HUMAN;H7C013|H7C013_HUMAN	Oxidation (M); Carbamidomethylation; Carbamidomethylation	C9:Carbamidomethylation:1000.00;C10:Carbamidomethylation:1000.00	FALSE
ETYGEMAD(+21.98)C(+57.02)C(+57.02)AK	68.66	1455.51	12	-4	728.758	2	6.0308	2370000	13200000	1087	20210614_HS_50ng_RAW-5.raw	22	A0A0C4DGB6|A0A0C4DGB6_HUMAN;A0A087WWT3|A0A087WWT3_HUMAN;P02768|ALBU_HUMAN;H7C013|H7C013_HUMAN	Sodium adduct; Carbamidomethylation; Carbamidomethylation	D8:Sodium adduct:12.33;C9:Carbamidomethylation:1000.00;C10:Carbamidomethylation:1000.00	FALSE
ETYGEMADC(+57.02)C(+57.02)AK	83.96	1433.53	12	-1.5	717.769	2	13.6536	284000000	1200000000	2617	20210614_HS_50ng_RAW-5.raw	418	A0A0C4DGB6|A0A0C4DGB6_HUMAN;A0A087WWT3|A0A087WWT3_HUMAN;P02768|ALBU_HUMAN;H7C013|H7C013_HUMAN	Carbamidomethylation; Carbamidomethylation	C9:Carbamidomethylation:1000.00;C10:Carbamidomethylation:1000.00	FALSE
EVAFDLEIPK	55	1159.61	10	4.9	580.816	2	23.0083	9980000	48500000	5334	20210614_HS_50ng_RAW-5.raw	15	P19827|ITIH1_HUMAN;F8WAS2|F8WAS2_HUMAN			FALSE
EVGPTNADPVC(+57.02)LAK	70.53	1469.72	14	-0.4	735.866	2	17.0378	9680000	65600000	3388	20210614_HS_50ng_RAW-6.raw	18	E9PFZ2|E9PFZ2_HUMAN;H7C5R1|H7C5R1_HUMAN;P00450|CERU_HUMAN	Carbamidomethylation	C11:Carbamidomethylation:1000.00	FALSE
EVGTPHGIILDSVDAAFIC(+57.02)PGSSR	75.39	2497.23	24	1.3	833.417	3	25.9253	5330000	43000000	6094	20210614_HS_50ng_RAW-5.raw	14	P02790|HEMO_HUMAN	Carbamidomethylation	C19:Carbamidomethylation:1000.00	FALSE
EVGTVLSQVYSK	51.41	1308.69	12	1.8	655.353	2	18.7398	416000	3750000	3890	20210614_HS_50ng_RAW-2.raw	3	P04114|APOB_HUMAN			FALSE
EVPLNTIIFMGR	63.64	1388.75	12	-0.8	695.381	2	25.8662	949000	10200000	6093	20210614_HS_50ng_RAW-5.raw	9	P01008|ANT3_HUMAN;Q8TCE1|Q8TCE1_HUMAN			FALSE
EVQLVE(+21.98)SGGGLVQPGGSLR	48.67	1902.98	19	-1.1	635.332	3	20.8953	377000	5600000	5004	20210614_HS_50ng_RAW-1.raw	9		Sodium adduct	E6:Sodium adduct:37.25	FALSE
EVQLVESGGGLVQ(+0.98)PGGSLR	41.45	1881.98	19	8.3	628.339	3	21.0312	412000	2300000	4708	20210614_HS_50ng_RAW-14.raw	1		Deamidation (NQ)	Q13:Deamidation (NQ):0.00	FALSE
EVQLVESGGGLVQPGGSLR	78.2	1881	19	-3.1	628.004	3	20.8953	28400000	258000000	4993	20210614_HS_50ng_RAW-1.raw	35				FALSE
EVQPVELPNC(+57.02)NLVK	45.74	1637.84	14	3.1	819.932	2	20.6086	927000	12100000	4538	20210614_HS_50ng_RAW-3.raw	11	P27169|PON1_HUMAN	Carbamidomethylation	C10:Carbamidomethylation:1000.00	FALSE
EVVADSVWVDVK	61.5	1344.69	12	-0.3	673.353	2	21.0217	9660000	66100000	4645	20210614_HS_50ng_RAW-3.raw	16	P01024|CO3_HUMAN			FALSE
EVVSLTEAC(+57.02)C(+57.02)AEGADPDC(+57.02)YDTR	73.18	2517.01	22	1.4	840.012	3	19.0508	2090000	25200000	4084	20210614_HS_50ng_RAW-9.raw	15	D6RBJ7|D6RBJ7_HUMAN;P02774|VTDB_HUMAN;D6RF20|D6RF20_HUMAN;D6RF35|D6RF35_HUMAN	Carbamidomethylation; Carbamidomethylation; Carbamidomethylation	C9:Carbamidomethylation:1000.00;C10:Carbamidomethylation:1000.00;C18:Carbamidomethylation:1000.00	FALSE
EVYGFNPEGK	54.75	1138.53	10	1.7	570.273	2	14.3341	1580000	5630000	2733	20210614_HS_50ng_RAW-3.raw	14	A8MUN2|A8MUN2_HUMAN;A0A669KB70|A0A669KB70_HUMAN;P04114|APOB_HUMAN			FALSE
EWFWDLATGTM(+15.99)K	58.96	1499.68	12	0.4	750.845	2	26.0658	1130000	8260000	6166	20210614_HS_50ng_RAW-4.raw	14	P02790|HEMO_HUMAN;Q9BS19|Q9BS19_HUMAN	Oxidation (M)		FALSE
EWFWDLATGTMK	71.39	1483.68	12	1.9	742.849	2	27.6419	1650000	9340000	6447	20210614_HS_50ng_RAW-5.raw	14	P02790|HEMO_HUMAN;Q9BS19|Q9BS19_HUMAN			FALSE
EYC(+57.02)GVPGDGDEELLR	31.05	1707.74	15	1.3	854.879	2	18.8035	129000	1660000	4287	20210614_HS_50ng_RAW-1.raw	4	P02760|AMBP_HUMAN	Carbamidomethylation	C3:Carbamidomethylation:1000.00	FALSE
EYSGTIASEAN(+0.98)TYLNSK	46.45	1847.84	17	5.2	924.933	2	19.5912	772000	9190000	4265	20210614_HS_50ng_RAW-9.raw	9	P04114|APOB_HUMAN	Deamidation (NQ)	N11:Deamidation (NQ):42.68	FALSE
EYSGTIASEANTYLN(+0.98)SK	63.25	1847.84	17	2.7	924.931	2	19.6613	240000	2790000	4218	20210614_HS_50ng_RAW-6.raw	3	P04114|APOB_HUMAN	Deamidation (NQ)	N15:Deamidation (NQ):33.81	FALSE
EYSGTIASEANTYLNSK	58.58	1846.86	17	0.3	924.437	2	19.5954	377000	3890000	4209	20210614_HS_50ng_RAW-3.raw	13	P04114|APOB_HUMAN			FALSE
EYTDASFTNR	44.82	1202.52	10	-1.2	602.265	2	7.5922	647000	2890000	1418	20210614_HS_50ng_RAW-2.raw	7	E9PFZ2|E9PFZ2_HUMAN;H7C5R1|H7C5R1_HUMAN;P00450|CERU_HUMAN			FALSE
EYVLPSFEVIVEPTEK	63.85	1877.97	16	1.7	939.992	2	26.8544	1860000	15900000	6265	20210614_HS_50ng_RAW-8.raw	14	P01024|CO3_HUMAN			FALSE
FAHYVVTSQVVNTANEAR	76.94	2005	18	1.3	669.342	3	18.7845	3290000	41600000	3944	20210614_HS_50ng_RAW-3.raw	15	P19827|ITIH1_HUMAN;F8WAS2|F8WAS2_HUMAN			FALSE
FATTFYQHLADSK	70.07	1527.74	13	1.5	764.876	2	19.7271	6420000	58600000	4318	20210614_HS_50ng_RAW-4.raw	29	P01008|ANT3_HUMAN;Q8TCE1|Q8TCE1_HUMAN			FALSE
FDEFFSE(+21.98)GC(+57.02)APGSK	35.01	1598.63	14	-0.8	533.884	3	19.2666	62800	594000	4434	20210614_HS_50ng_RAW-1.raw	1	H7C5E8|H7C5E8_HUMAN;P02787|TRFE_HUMAN	Sodium adduct; Carbamidomethylation	E7:Sodium adduct:14.15;C9:Carbamidomethylation:1000.00	FALSE
FDEFFSEGC(+57.02)APGSK	85.57	1576.65	14	1.2	789.333	2	19.5784	57500000	896000000	4409	20210614_HS_50ng_RAW-8.raw	64	H7C5E8|H7C5E8_HUMAN;P02787|TRFE_HUMAN	Carbamidomethylation	C9:Carbamidomethylation:1000.00	FALSE
FDHVITNMNNNYEPR	58.16	1862.84	15	-0.7	621.952	3	17.7386	571000	7540000	3626	20210614_HS_50ng_RAW-6.raw	11	A0A0A0MSV6|A0A0A0MSV6_HUMAN;P02746|C1QB_HUMAN;D6R934|D6R934_HUMAN			FALSE
FEDGVLDPDYPR	71.78	1421.65	12	3.1	711.833	2	19.3323	8140000	62100000	4149	20210614_HS_50ng_RAW-5.raw	18	P04004|VTNC_HUMAN			FALSE
FEVQVTVPK	61.38	1045.58	9	2.1	523.799	2	19.2844	23200000	218000000	4092	20210614_HS_50ng_RAW-15.raw	15	P01023|A2MG_HUMAN			FALSE
FFESFGDLSTPDAVMGNPK	67.72	2057.94	19	0.4	1029.98	2	25.153	482000	4550000	5960	20210614_HS_50ng_RAW-9.raw	7	F8W6P5|F8W6P5_HUMAN;P68871|HBB_HUMAN;A0A2R8Y7R2|A0A2R8Y7R2_HUMAN			FALSE
FKDLGEENFK	60.95	1225.6	10	-2.2	613.805	2	14.7117	159000000	1070000000	3157	20210614_HS_50ng_RAW-4.raw	130	A0A0C4DGB6|A0A0C4DGB6_HUMAN;A0A087WWT3|A0A087WWT3_HUMAN;P02768|ALBU_HUMAN;H7C013|H7C013_HUMAN;C9JKR2|C9JKR2_HUMAN;B7WNR0|B7WNR0_HUMAN			FALSE
FLC(+57.02)TGGVSPYADPNTC(+57.02)R	45.46	1913.84	17	-1.1	957.926	2	18.7081	1920000	22200000	4039	20210614_HS_50ng_RAW-11.raw	20	H7C5H1|H7C5H1_HUMAN;E7ETN3|E7ETN3_HUMAN;P00751|CFAB_HUMAN;B4E1Z4|B4E1Z4_HUMAN	Carbamidomethylation; Carbamidomethylation	C3:Carbamidomethylation:1000.00;C16:Carbamidomethylation:1000.00	FALSE
FLEQQNQVLQTK	67.89	1474.78	12	1.9	738.398	2	16.2411	8810000	50300000	3193	20210614_HS_50ng_RAW-15.raw	17	#CONTAM#cont|000132|;#CONTAM#cont|000135|;#CONTAM#cont|000134|;P04264|K2C1_HUMAN			FALSE
FLVNLVK	32.69	831.522	7	0	416.768	2	20.7049	406000	3840000	4937	20210614_HS_50ng_RAW-1.raw	10	P43652|AFAM_HUMAN			FALSE
FMQAVTGWK	47.86	1066.53	9	-0.6	534.27	2	18.9493	444000	3620000	4122	20210614_HS_50ng_RAW-12.raw	9	P01019|ANGT_HUMAN			FALSE
FN(+0.98)WYVDGVEVHNAK	55.38	1677.78	14	2.9	560.268	3	21.1153	1640000	18700000	4675	20210614_HS_50ng_RAW-6.raw	16	P01857|IGHG1_HUMAN;A0A0A0MS08|A0A0A0MS08_HUMAN	Deamidation (NQ)	N2:Deamidation (NQ):63.00	FALSE
FNAVLTNPQGDYDTSTGK	76.45	1926.9	18	2	964.457	2	18.2976	2620000	26200000	3803	20210614_HS_50ng_RAW-8.raw	15	P02747|C1QC_HUMAN			FALSE
FNWYVDGVEVHN(+0.98)AK	57.4	1677.78	14	4.8	560.269	3	22.0086	1480000	17700000	4951	20210614_HS_50ng_RAW-3.raw	8	P01857|IGHG1_HUMAN;A0A0A0MS08|A0A0A0MS08_HUMAN	Deamidation (NQ)	N12:Deamidation (NQ):22.59	FALSE
FNWYVDGVEVHNAK	70.66	1676.79	14	3.7	559.941	3	21.2771	28600000	161000000	4737	20210614_HS_50ng_RAW-3.raw	139	P01857|IGHG1_HUMAN;A0A0A0MS08|A0A0A0MS08_HUMAN			FALSE
FPEVDVLTK	58.38	1046.56	9	-0.9	524.289	2	20.22	6350000	52200000	4412	20210614_HS_50ng_RAW-8.raw	13	P04114|APOB_HUMAN			FALSE
FPKAEFAEVSK	62.82	1251.65	11	-2.2	418.223	3	17.0664	482000	5050000	3430	20210614_HS_50ng_RAW-8.raw	13	A0A0C4DGB6|A0A0C4DGB6_HUMAN;P02768|ALBU_HUMAN;C9JKR2|C9JKR2_HUMAN;D6RHD5|D6RHD5_HUMAN;B7WNR0|B7WNR0_HUMAN;H0YA55|H0YA55_HUMAN			FALSE
FPSGTFEQVSQLVK	68.81	1565.81	14	3	783.914	2	23.7518	3830000	28200000	5499	20210614_HS_50ng_RAW-8.raw	15	D6RBJ7|D6RBJ7_HUMAN;P02774|VTDB_HUMAN;D6RF20|D6RF20_HUMAN;D6RF35|D6RF35_HUMAN			FALSE
FQN(+0.98)ALLVR	50.72	960.539	8	-2.9	481.276	2	17.3129	13400000	137000000	3471	20210614_HS_50ng_RAW-6.raw	25	A0A0C4DGB6|A0A0C4DGB6_HUMAN;A0A087WWT3|A0A087WWT3_HUMAN;P02768|ALBU_HUMAN;C9JKR2|C9JKR2_HUMAN;D6RHD5|D6RHD5_HUMAN;B7WNR0|B7WNR0_HUMAN;H0YA55|H0YA55_HUMAN	Deamidation (NQ)	N3:Deamidation (NQ):17.01	FALSE
FQNALLVR	58.19	959.555	8	0.2	480.785	2	22.0709	1110000000	5000000000	4996	20210614_HS_50ng_RAW-3.raw	335	A0A0C4DGB6|A0A0C4DGB6_HUMAN;A0A087WWT3|A0A087WWT3_HUMAN;P02768|ALBU_HUMAN;C9JKR2|C9JKR2_HUMAN;D6RHD5|D6RHD5_HUMAN;B7WNR0|B7WNR0_HUMAN;H0YA55|H0YA55_HUMAN			FALSE
FQNSAILTIQPK	67.6	1358.76	12	3.5	680.388	2	19.9797	771000	9390000	4345	20210614_HS_50ng_RAW-8.raw	14	P01031|CO5_HUMAN			FALSE
FQPTLLTLPR	59.38	1184.69	10	3.7	593.355	2	23.6479	11300000	96400000	5500	20210614_HS_50ng_RAW-5.raw	16	H9KV48|H9KV48_HUMAN;P05155|IC1_HUMAN;E9PGN7|E9PGN7_HUMAN			FALSE
FQSVFTVTR	55.78	1083.57	9	2.2	542.794	2	19.2328	1510000	15100000	4122	20210614_HS_50ng_RAW-5.raw	15	P02747|C1QC_HUMAN			FALSE
FSAIC(+57.02)QGDGTWSPR	66.39	1580.7	14	1.4	791.361	2	18.8846	1140000	12500000	3979	20210614_HS_50ng_RAW-8.raw	15	P04003|C4BPA_HUMAN	Carbamidomethylation	C5:Carbamidomethylation:1000.00	FALSE
FSGQLN(+0.98)SHGC(+57.02)FYQQVK	41.48	1899.86	16	3.2	634.295	3	18.221			4107	20210614_HS_50ng_RAW-1.raw	1	P01023|A2MG_HUMAN	Deamidation (NQ); Carbamidomethylation	N6:Deamidation (NQ):26.08;C10:Carbamidomethylation:1000.00	FALSE
FSGQLNSHGC(+57.02)FYQQVK	50.58	1898.87	16	-0.3	633.965	3	18.0632	5300000	43300000	3794	20210614_HS_50ng_RAW-4.raw	10	P01023|A2MG_HUMAN	Carbamidomethylation	C10:Carbamidomethylation:1000.00	FALSE
FSGSGAGTDFTLK	53.75	1286.61	13	1.6	644.315	2	17.6499	579000	6300000	3598	20210614_HS_50ng_RAW-6.raw	7				FALSE
FSGSGSGTDFTLK	66.45	1302.61	13	-1.5	652.311	2	16.8412	21500000	91300000	3386	20210614_HS_50ng_RAW-5.raw	16				FALSE
FSGSGSGTDFTLTISR	80.94	1631.78	16	2.9	816.899	2	20.841	7050000	54400000	4634	20210614_HS_50ng_RAW-5.raw	15				FALSE
FSGSN(+0.98)SGNTATLTISR	42.27	1612.77	16	0	807.392	2	14.8994	37800	569000	3172	20210614_HS_50ng_RAW-1.raw	2		Deamidation (NQ)	N5:Deamidation (NQ):22.45	FALSE
FSGSNSGN(+0.98)TATLTISR	48.73	1612.77	16	5.4	807.396	2	15.7777	23800	316000	3168	20210614_HS_50ng_RAW-11.raw	1		Deamidation (NQ)	N8:Deamidation (NQ):12.33	FALSE
FSGSNSGNTATLTISR	80.94	1611.79	16	0.2	806.9	2	15.4277	4400000	21500000	2980	20210614_HS_50ng_RAW-8.raw	17				FALSE
FSPATHPSEGLEENYC(+57.02)R	47.3	1992.86	17	-3.1	665.293	3	16.3585	1950000	17200000	3366	20210614_HS_50ng_RAW-10.raw	10	P00747|PLMN_HUMAN	Carbamidomethylation	C16:Carbamidomethylation:1000.00	FALSE
FTC(+57.02)TVTHTDLPSPLK	77.56	1715.86	15	4	858.938	2	19.8186	6280000	58900000	4282	20210614_HS_50ng_RAW-8.raw	18	P01871|IGHM_HUMAN	Carbamidomethylation	C3:Carbamidomethylation:1000.00	FALSE
FTFEYSR	29.32	948.434	7	-2.8	475.223	2	16.5548	60700	421000	3589	20210614_HS_50ng_RAW-1.raw	1	P43652|AFAM_HUMAN			FALSE
FVTWIEGVMR	45.12	1236.63	10	7.1	619.328	2	25.0592	1500000	9040000	6039	20210614_HS_50ng_RAW-13.raw	13	P00747|PLMN_HUMAN			FALSE
FYNQVSTPLLR	65.25	1336.71	11	1.6	669.365	2	20.6191	3450000	29900000	4556	20210614_HS_50ng_RAW-8.raw	13	#CONTAM#cont|000108|;Q5T985|Q5T985_HUMAN;P19823|ITIH2_HUMAN			FALSE
FYYIYNEK	54.17	1138.53	8	2.2	570.275	2	18.2258	13500000	98800000	3806	20210614_HS_50ng_RAW-5.raw	30	P01024|CO3_HUMAN			FALSE
FYYLIASETPGK	44.32	1387.7	12	2.2	694.86	2	21.2252	8590	172000	5112	20210614_HS_50ng_RAW-1.raw	1	P29622|KAIN_HUMAN			FALSE
GAYPLSIEPIGVR	62.03	1370.76	13	5.7	686.387	2	23.3672	3020000	20600000	5106	20210614_HS_50ng_RAW-2.raw	3	E9PFZ2|E9PFZ2_HUMAN;H7C5R1|H7C5R1_HUMAN;P00450|CERU_HUMAN			FALSE
GDAVC(+57.02)TESGWRPLPSC(+57.02)EEK	64.23	2176.95	19	-1.7	726.657	3	18.1859	2680000	28500000	3799	20210614_HS_50ng_RAW-5.raw	15	A0A0D9SG88|A0A0D9SG88_HUMAN;P08603|CFAH_HUMAN;Q5TFM2|Q5TFM2_HUMAN	Carbamidomethylation; Carbamidomethylation	C5:Carbamidomethylation:1000.00;C16:Carbamidomethylation:1000.00	FALSE
GDTFSC(+57.02)M(+15.99)VGHEALPLAFTQK	44.95	2224.03	20	2.1	742.352	3	23.2956	390000	5800000	5359	20210614_HS_50ng_RAW-3.raw	10	P01876|IGHA1_HUMAN;A0A286YEY1|A0A286YEY1_HUMAN	Carbamidomethylation; Oxidation (M)	C6:Carbamidomethylation:1000.00	FALSE
GDTFSC(+57.02)MVGHEALPLAFTQK	76.21	2208.03	20	-5	737.015	3	25.2083	2550000	29600000	5917	20210614_HS_50ng_RAW-5.raw	15	P01876|IGHA1_HUMAN;A0A286YEY1|A0A286YEY1_HUMAN	Carbamidomethylation	C6:Carbamidomethylation:1000.00	FALSE
GEC(+57.02)Q(+0.98)AEGVLFFQGDR	31.01	1712.75	15	9.3	857.388	2	22.3042	23300	235000	5198	20210614_HS_50ng_RAW-12.raw	1	P02790|HEMO_HUMAN;Q9BS19|Q9BS19_HUMAN	Carbamidomethylation; Deamidation (NQ)	C3:Carbamidomethylation:1000.00;Q4:Deamidation (NQ):64.00	FALSE
GEC(+57.02)QAEGVLFFQGDR	74.08	1711.76	15	3.2	856.891	2	21.6173	7670000	104000000	4819	20210614_HS_50ng_RAW-15.raw	33	P02790|HEMO_HUMAN;Q9BS19|Q9BS19_HUMAN	Carbamidomethylation	C3:Carbamidomethylation:1000.00	FALSE
GEC(+57.02)VPGEQEPEPILIPR	64.32	1918.95	17	2.1	960.482	2	21.7089	1050000	15500000	4862	20210614_HS_50ng_RAW-3.raw	15	P02760|AMBP_HUMAN;S4R471|S4R471_HUMAN	Carbamidomethylation	C3:Carbamidomethylation:1000.00	FALSE
GEVQAM(+15.99)LGQSTEELR	51.76	1662.79	15	-1.8	832.4	2	16.6644	304000	4480000	3474	20210614_HS_50ng_RAW-13.raw	10	E7ERP7|E7ERP7_HUMAN;E9PEV4|E9PEV4_HUMAN;P02649|APOE_HUMAN;H0Y7L5|H0Y7L5_HUMAN	Oxidation (M)		FALSE
GEWVALNPLR	53.38	1153.62	10	3.2	577.821	2	22.5142	405000	3490000	5138	20210614_HS_50ng_RAW-3.raw	8	A0A0D9SG88|A0A0D9SG88_HUMAN;P08603|CFAH_HUMAN;Q5TFM2|Q5TFM2_HUMAN			FALSE
GFEPTLEALFGK	63.17	1307.68	12	2.8	654.847	2	26.8474	2850000	21600000	6289	20210614_HS_50ng_RAW-5.raw	15	A8MUN2|A8MUN2_HUMAN;P04114|APOB_HUMAN			FALSE
GFSLDEATNLN(+0.98)GGLLR	40.38	1676.84	16	5.1	839.43	2	24.1576	31500	434000	5698	20210614_HS_50ng_RAW-4.raw	1	P19827|ITIH1_HUMAN	Deamidation (NQ)	N11:Deamidation (NQ):32.28	FALSE
GFYPSDIAVE(+21.98)WESN(+0.98)GQPENNYK	63.25	2566.09	22	3.9	856.374	3	24.118	1820000	7250000	5740	20210614_HS_50ng_RAW-12.raw	12	P01857|IGHG1_HUMAN;A0A0A0MS08|A0A0A0MS08_HUMAN;A0A0A0MS07|A0A0A0MS07_HUMAN	Sodium adduct; Deamidation (NQ)	E10:Sodium adduct:3.56;N14:Deamidation (NQ):14.04	FALSE
GFYPSDIAVEWE(+21.98)SN(+0.98)GQPENNYK	52.76	2566.09	22	4.9	856.375	3	24.2261	487000	2050000	5620	20210614_HS_50ng_RAW-6.raw	4	P01857|IGHG1_HUMAN;A0A0A0MS08|A0A0A0MS08_HUMAN;A0A0A0MS07|A0A0A0MS07_HUMAN	Sodium adduct; Deamidation (NQ)	E12:Sodium adduct:11.10;N14:Deamidation (NQ):14.04	FALSE
GFYPSDIAVEWE(+21.98)SNGQPENNYK	35.29	2565.11	22	2.3	856.045	3	24.3718	36800	199000	5754	20210614_HS_50ng_RAW-4.raw	1	P01857|IGHG1_HUMAN;A0A0A0MS08|A0A0A0MS08_HUMAN;A0A0A0MS07|A0A0A0MS07_HUMAN	Sodium adduct	E12:Sodium adduct:0.00	FALSE
GFYPSDIAVEWESN(+0.98)GQ(+0.98)PENNYK	52.21	2545.09	22	8.4	849.378	3	23.9199	3830000	10500000	6025	20210614_HS_50ng_RAW-1.raw	2	P01857|IGHG1_HUMAN;A0A0A0MS08|A0A0A0MS08_HUMAN;A0A0A0MS07|A0A0A0MS07_HUMAN	Deamidation (NQ); Deamidation (NQ)	N14:Deamidation (NQ):53.92;Q16:Deamidation (NQ):28.36	FALSE
GFYPSDIAVEWESN(+0.98)GQPENNYK	61.54	2544.11	22	2.4	849.045	3	24.2261	35500000	99500000	5688	20210614_HS_50ng_RAW-8.raw	32	P01857|IGHG1_HUMAN;A0A0A0MS08|A0A0A0MS08_HUMAN;A0A0A0MS07|A0A0A0MS07_HUMAN	Deamidation (NQ)	N14:Deamidation (NQ):14.04	FALSE
GFYPSDIAVEWESNGQ(+0.98)PENNYK	58.05	2544.11	22	1.3	849.044	3	24.7276	13300000	26200000	5739	20210614_HS_50ng_RAW-4.raw	11	P01857|IGHG1_HUMAN;A0A0A0MS08|A0A0A0MS08_HUMAN;A0A0A0MS07|A0A0A0MS07_HUMAN	Deamidation (NQ)	Q16:Deamidation (NQ):0.00	FALSE
GFYPSDIAVEWESNGQPENNYK	51.54	2543.12	22	3.1	848.718	3	24.3094	30700000	167000000	5854	20210614_HS_50ng_RAW-13.raw	27	P01857|IGHG1_HUMAN;A0A0A0MS08|A0A0A0MS08_HUMAN;A0A0A0MS07|A0A0A0MS07_HUMAN			FALSE
GFYPSDISVEWESN(+0.98)GQPENNYK	36	2560.1	22	9.1	854.383	3	23.9244			5984	20210614_HS_50ng_RAW-1.raw	1	P01859|IGHG2_HUMAN;A0A286YEY4|A0A286YEY4_HUMAN	Deamidation (NQ)	N14:Deamidation (NQ):14.04	FALSE
GFYPSDISVEWESNGQPENNYK	40.26	2559.12	22	-4.7	854.043	3	24.2066	6600	107000	5750	20210614_HS_50ng_RAW-7.raw	1	P01859|IGHG2_HUMAN;A0A286YEY4|A0A286YEY4_HUMAN			FALSE
GGEGTGYFVDFSVR	59.42	1489.68	14	1.3	745.85	2	22.6199	915000	10200000	5168	20210614_HS_50ng_RAW-6.raw	12	P04196|HRG_HUMAN			FALSE
GGYTLVSGYPK	63.6	1140.58	11	-4.4	571.295	2	17.3184	24100000	155000000	3479	20210614_HS_50ng_RAW-3.raw	17	P02790|HEMO_HUMAN			FALSE
GHFSISIPVK	71.74	1083.61	10	1.6	542.812	2	20.2467	6700000	46600000	4771	20210614_HS_50ng_RAW-1.raw	15	P01023|A2MG_HUMAN			FALSE
GHLFLQTDQPIYNPGQR	76.63	1983	17	-1.2	662.005	3	21.0653	4140000	34700000	4735	20210614_HS_50ng_RAW-5.raw	13				FALSE
GIISALLVPPETEEAK	65.05	1665.92	16	1.4	833.968	2	25.0468	4610000	33100000	5811	20210614_HS_50ng_RAW-6.raw	18	A8MUN2|A8MUN2_HUMAN;P04114|APOB_HUMAN			FALSE
GISTSAASPAVGTVGM(+15.99)D(+21.98)M(+15.99)DEDDDFSK	59.93	2656.08	26	1.8	886.368	3	18.0592	23200	420000	4062	20210614_HS_50ng_RAW-1.raw	1	P04114|APOB_HUMAN	Oxidation (M); Sodium adduct; Oxidation (M)	M16:Oxidation (M):1000.00;D17:Sodium adduct:32.28;M18:Oxidation (M):1000.00	FALSE
GISTSAASPAVGTVGM(+15.99)DM(+15.99)DEDDDFSK	76.09	2634.09	26	2.1	879.041	3	18.2976	3130000	36600000	3806	20210614_HS_50ng_RAW-8.raw	14	P04114|APOB_HUMAN	Oxidation (M); Oxidation (M)		FALSE
GLC(+57.02)VATPVQLR	66.96	1212.66	11	4.7	607.342	2	19.991	3350000	39700000	4366	20210614_HS_50ng_RAW-5.raw	15		Carbamidomethylation	C3:Carbamidomethylation:1000.00	FALSE
GLETSLAEC(+57.02)TFTK	62.01	1455.69	13	6.3	728.858	2	19.3637	77900	1380000	4325	20210614_HS_50ng_RAW-13.raw	5	G3XAM2|G3XAM2_HUMAN;A0A2R8Y3M9|A0A2R8Y3M9_HUMAN;E7ETH0|E7ETH0_HUMAN;P05156|CFAI_HUMAN	Carbamidomethylation	C9:Carbamidomethylation:1000.00	FALSE
GLEVTITAR	51.26	958.545	9	-0.7	480.279	2	16.5504	3040000	9380000	3263	20210614_HS_50ng_RAW-3.raw	14	P01024|CO3_HUMAN			FALSE
GMADQDGLKPTIDKPSEDSPPLEMLGPR	57.38	2993.45	28	6.6	749.374	4	23.1342	166000	1520000	5403	20210614_HS_50ng_RAW-4.raw	2	P19827|ITIH1_HUMAN			FALSE
GPDVLTATVSGK	59.11	1143.61	12	2	572.815	2	14.5522	933000	4660000	2909	20210614_HS_50ng_RAW-13.raw	16	Q14624|ITIH4_HUMAN;B7ZKJ8|B7ZKJ8_HUMAN;H7C0L5|H7C0L5_HUMAN			FALSE
GPEVQLVAHSPWLK	63.01	1559.85	14	1.3	780.931	2	22.4957	6220000	48400000	5136	20210614_HS_50ng_RAW-6.raw	19				FALSE
GPSVFPLAPC(+57.02)SR	69.64	1286.64	12	-0.3	644.329	2	20.2739	64300000	529000000	4438	20210614_HS_50ng_RAW-3.raw	31	P01859|IGHG2_HUMAN;A0A4W9A917|A0A4W9A917_HUMAN;P01860|IGHG3_HUMAN;A0A286YEY4|A0A286YEY4_HUMAN;A0A286YES1|A0A286YES1_HUMAN	Carbamidomethylation	C10:Carbamidomethylation:1000.00	FALSE
GPSVFPLAPSSK	73.61	1185.64	12	-0.3	593.827	2	19.511	148000000	1760000000	4138	20210614_HS_50ng_RAW-8.raw	83	P01857|IGHG1_HUMAN;A0A0A0MS08|A0A0A0MS08_HUMAN;A0A0A0MS07|A0A0A0MS07_HUMAN			FALSE
GPSVFPLAPSSK(+21.98)	37.44	1207.62	12	1.5	604.819	2	19.3907	480000	6580000	4260	20210614_HS_50ng_RAW-11.raw	9	P01857|IGHG1_HUMAN;A0A0A0MS08|A0A0A0MS08_HUMAN;A0A0A0MS07|A0A0A0MS07_HUMAN	Sodium adduct		FALSE
GQELC(+57.02)ADYSENTFTEYK	63.12	2053.86	17	-0.2	1027.94	2	19.3785	1020000	13300000	4178	20210614_HS_50ng_RAW-5.raw	15	P02774|VTDB_HUMAN;D6RF35|D6RF35_HUMAN	Carbamidomethylation	C5:Carbamidomethylation:1000.00	FALSE
GQGTLSVVTM(+15.99)YHAK	39.54	1506.75	14	-2.1	503.256	3	16.372	121000	883000	3391	20210614_HS_50ng_RAW-13.raw	3	P01024|CO3_HUMAN;M0QYC8|M0QYC8_HUMAN	Oxidation (M)		FALSE
GQGTLSVVTMYHAK	63.85	1490.76	14	-1	497.925	3	18.6289	2040000	21300000	3953	20210614_HS_50ng_RAW-4.raw	15	P01024|CO3_HUMAN;M0QYC8|M0QYC8_HUMAN			FALSE
GQPSVLQVVNLPIVERPVC(+57.02)K	58.82	2231.25	20	0.6	744.756	3	26.106	1130000	13100000	6142	20210614_HS_50ng_RAW-5.raw	12	P00734|THRB_HUMAN;E9PIT3|E9PIT3_HUMAN	Carbamidomethylation	C19:Carbamidomethylation:1000.00	FALSE
GSFEFPVGDAVSK	65.02	1338.65	13	-3.2	670.328	2	20.9343	10500000	101000000	4618	20210614_HS_50ng_RAW-3.raw	16				FALSE
GSFPWQAK	60.13	919.455	8	-3.6	460.733	2	16.5548	46700000	416000000	3749	20210614_HS_50ng_RAW-1.raw	46	P00738|HPT_HUMAN;A0A087WU08|A0A087WU08_HUMAN;H0Y300|H0Y300_HUMAN;A0A0C4DGL8|A0A0C4DGL8_HUMAN;J3QR68|J3QR68_HUMAN			FALSE
GSLGGGFSSGGFSGGSFSR	48.22	1706.76	19	2.7	854.392	2	20.2256	70100	1350000	4480	20210614_HS_50ng_RAW-9.raw	4	#CONTAM#cont|000133|;P13645|K1C10_HUMAN;#CONTAM#cont|000129|;#CONTAM#cont|000136|;#CONTAM#cont|000122|			FALSE
GSLVQASEANLQAAQDFVR	70.29	2003.01	19	-0.7	1002.51	2	23.6456	876000	11600000	5540	20210614_HS_50ng_RAW-4.raw	14	P19827|ITIH1_HUMAN			FALSE
GSPAINVAVHVFR	71.17	1365.75	13	1.9	456.259	3	21.2702	4020000	34200000	4718	20210614_HS_50ng_RAW-15.raw	14	P02766|TTHY_HUMAN;A0A087WT59|A0A087WT59_HUMAN			FALSE
GSQTQSHPDLGTEGC(+57.02)WDQLSAPR	45.89	2526.12	23	2.8	843.049	3	20.0553	29700	467000	4491	20210614_HS_50ng_RAW-12.raw	1	Q96PD5|PGRP2_HUMAN	Carbamidomethylation	C15:Carbamidomethylation:1000.00	FALSE
GTEAAGAM(+15.99)FLEAIPM(+15.99)SIPPEVK	43.43	2290.12	22	-3.1	764.379	3	26.1443	4630000	14400000	6098	20210614_HS_50ng_RAW-8.raw	13		Oxidation (M); Oxidation (M)		FALSE
GTEAAGAMFLEAIPM(+15.99)SIPPEVK	49.04	2274.13	22	2.4	759.052	3	27.5954	938000	3300000	6340	20210614_HS_50ng_RAW-3.raw	5		Oxidation (M)	M15:Oxidation (M):8.82	FALSE
GTFATLSELHC(+57.02)DK	23.45	1477.69	13	0.1	493.57	3	18.2976	10300	160000	3813	20210614_HS_50ng_RAW-8.raw	1	P68871|HBB_HUMAN;A0A2R8Y7R2|A0A2R8Y7R2_HUMAN	Carbamidomethylation	C11:Carbamidomethylation:1000.00	FALSE
GVALHRPDVYLLPPAR	76.29	1773	16	2.1	592.01	3	21.6953	3900000	38900000	4929	20210614_HS_50ng_RAW-4.raw	24	P01871|IGHM_HUMAN			FALSE
GVTSVSQIFHSPDLAIR	63.53	1825.97	17	3.3	913.995	2	24.5016	11700000	88200000	5731	20210614_HS_50ng_RAW-8.raw	29	H9KV48|H9KV48_HUMAN;P05155|IC1_HUMAN;E9PGN7|E9PGN7_HUMAN			FALSE
GWVTDGFSSLK	58.58	1195.59	11	3.7	598.803	2	21.6045	722000	7200000	4907	20210614_HS_50ng_RAW-4.raw	14	P02656|APOC3_HUMAN;B0YIW2|B0YIW2_HUMAN			FALSE
GYTQQLAFR	70.09	1082.55	9	0.7	542.283	2	16.5898	14600000	60100000	3264	20210614_HS_50ng_RAW-8.raw	16	P01024|CO3_HUMAN			FALSE
HLSLLTTLSNR	70.83	1253.71	11	1.5	418.911	3	20.5035	1310000	9500000	4515	20210614_HS_50ng_RAW-8.raw	17	D6RBJ7|D6RBJ7_HUMAN;P02774|VTDB_HUMAN;D6RF35|D6RF35_HUMAN			FALSE
HNVYIN(+0.98)GITYTPVSSTNEK	83.09	2137.03	19	-0.1	713.351	3	19.2958	9990000	63300000	4449	20210614_HS_50ng_RAW-1.raw	28	P01023|A2MG_HUMAN	Deamidation (NQ)	N6:Deamidation (NQ):42.89	FALSE
HPDYSVVLLLR	69.28	1310.73	11	1.5	656.376	2	23.8419	14300000	91400000	5502	20210614_HS_50ng_RAW-3.raw	32	A0A0C4DGB6|A0A0C4DGB6_HUMAN;P02768|ALBU_HUMAN;C9JKR2|C9JKR2_HUMAN;D6RHD5|D6RHD5_HUMAN;B7WNR0|B7WNR0_HUMAN;H0YA55|H0YA55_HUMAN			FALSE
HPYFYAPELLFFAK	79.03	1741.89	14	6.5	581.64	3	29.695	6080000	15300000	6787	20210614_HS_50ng_RAW-5.raw	13	A0A0C4DGB6|A0A0C4DGB6_HUMAN;P02768|ALBU_HUMAN;H7C013|H7C013_HUMAN;D6RHD5|D6RHD5_HUMAN;B7WNR0|B7WNR0_HUMAN;H0YA55|H0YA55_HUMAN			FALSE
HQFLLTGDTQGR	38.26	1371.69	12	-1.6	686.851	2	14.8576	138000	679000	2889	20210614_HS_50ng_RAW-9.raw	5	P04217|A1BG_HUMAN;M0R009|M0R009_HUMAN			FALSE
HQPQEFPTYVEPTNDEIC(+57.02)EAFR	96.87	2706.2	22	0.7	903.075	3	23.3698	6260000	51000000	5808	20210614_HS_50ng_RAW-1.raw	15	D6RBJ7|D6RBJ7_HUMAN;P02774|VTDB_HUMAN;D6RF35|D6RF35_HUMAN	Carbamidomethylation	C18:Carbamidomethylation:1000.00	FALSE
HSTIFENLANK	69.53	1272.65	11	-0.1	637.33	2	17.0218	60900000	359000000	3390	20210614_HS_50ng_RAW-3.raw	58	C9JVG0|C9JVG0_HUMAN;P02787|TRFE_HUMAN			FALSE
HTFMGVVSLGSPSGEVSHPR	57.92	2080.02	20	5.8	521.014	4	20.8162	946000	11200000	4681	20210614_HS_50ng_RAW-9.raw	17	P02765|FETUA_HUMAN;C9JV77|C9JV77_HUMAN			FALSE
IAELSATAQEIIK	58.13	1385.78	13	1.9	693.897	2	20.9139	3190000	31500000	4638	20210614_HS_50ng_RAW-8.raw	15	P04114|APOB_HUMAN			FALSE
IAPANADFAFR	35.74	1191.6	11	3.6	596.811	2	19.4266	127000	1690000	4215	20210614_HS_50ng_RAW-4.raw	4	P29622|KAIN_HUMAN			FALSE
IAPQLSTEELVSLGEK	65.8	1712.92	16	1.2	857.468	2	22.8727	1950000	21000000	5651	20210614_HS_50ng_RAW-1.raw	15	P43652|AFAM_HUMAN			FALSE
IAQWQSFQLEGGLK	78.81	1603.84	14	2.1	802.927	2	23.6205	9030000	81200000	5498	20210614_HS_50ng_RAW-5.raw	18	P01023|A2MG_HUMAN			FALSE
IASFSQNC(+57.02)DIYPGK	68.06	1598.74	14	-0.2	800.377	2	18.0956	1410000	13400000	3797	20210614_HS_50ng_RAW-4.raw	7	P01042|KNG1_HUMAN	Carbamidomethylation	C8:Carbamidomethylation:1000.00	FALSE
IDDIWNLEVK	56.52	1243.64	10	2.3	622.831	2	23.2335	3270000	26500000	5335	20210614_HS_50ng_RAW-3.raw	15	P04114|APOB_HUMAN			FALSE
IDSLLENDR	31.34	1073.54	9	-1.2	537.774	2	10.8481	540000	323000	2058	20210614_HS_50ng_RAW-12.raw	1	H0YLK8|H0YLK8_HUMAN;P10909|CLUS_HUMAN;H0YC35|H0YC35_HUMAN;E7ETB4|E7ETB4_HUMAN;E7ERK6|E7ERK6_HUMAN			FALSE
IDVHLVPDR	47.26	1062.58	9	-1.8	532.297	2	16.9526	199000	2040000	3461	20210614_HS_50ng_RAW-4.raw	7	P08603|CFAH_HUMAN			FALSE
IEC(+57.02)VSAE(+21.98)TTEDC(+57.02)IAK	32.03	1746.74	15	0.6	583.255	3	15.2785	126000	1060000	3001	20210614_HS_50ng_RAW-14.raw	2	P02787|TRFE_HUMAN	Carbamidomethylation; Sodium adduct; Carbamidomethylation	C3:Carbamidomethylation:1000.00;E7:Sodium adduct:14.62;C12:Carbamidomethylation:1000.00	FALSE
IEC(+57.02)VSAETTEDC(+57.02)IAK	68.82	1724.76	15	-1.6	863.386	2	15.4808	51600000	497000000	2970	20210614_HS_50ng_RAW-3.raw	51	P02787|TRFE_HUMAN	Carbamidomethylation; Carbamidomethylation	C3:Carbamidomethylation:1000.00;C12:Carbamidomethylation:1000.00	FALSE
IEDGFSLK	37.07	907.465	8	-0.9	454.739	2	15.3147	4020000	12000000	2990	20210614_HS_50ng_RAW-14.raw	16	P01008|ANT3_HUMAN			FALSE
IEFEWNTGTNVDTK	45.36	1652.77	14	2.1	827.393	2	21.1401	11400	198000	4708	20210614_HS_50ng_RAW-3.raw	1	P04114|APOB_HUMAN			FALSE
IEGDEEMHC(+57.02)SDDGFWSK	46.82	2040.78	17	-0.5	681.268	3	18.3213	696000	9240000	3982	20210614_HS_50ng_RAW-13.raw	14	A0A0D9SG88|A0A0D9SG88_HUMAN;P08603|CFAH_HUMAN	Carbamidomethylation	C9:Carbamidomethylation:1000.00	FALSE
IEGNLIFDPNNYLPK	51.6	1745.9	15	6.1	873.962	2	26.091	3140000	19500000	6068	20210614_HS_50ng_RAW-14.raw	15	A8MUN2|A8MUN2_HUMAN;P04114|APOB_HUMAN			FALSE
IEIPLPFGGK	53.8	1069.62	10	1.7	535.817	2	24.529	4270000	26600000	6135	20210614_HS_50ng_RAW-1.raw	14	P04114|APOB_HUMAN			FALSE
IEISELNR	31.11	972.524	8	-3.2	487.268	2	14.9761	3770000	9420000	2904	20210614_HS_50ng_RAW-4.raw	10	#CONTAM#cont|000132|;#CONTAM#cont|000135|;#CONTAM#cont|000134|;P04264|K2C1_HUMAN			FALSE
IFFYDSENPPASEVLR	63.7	1882.91	16	0.9	942.46	2	24.3863	2700000	19700000	5356	20210614_HS_50ng_RAW-2.raw	15	P27169|PON1_HUMAN			FALSE
IGQDGISTSATTNLK	74.27	1504.77	15	2	753.395	2	15.1923	3720000	20900000	2905	20210614_HS_50ng_RAW-3.raw	15	P04114|APOB_HUMAN			FALSE
IHSGSFQSQVELSNDQEK	52.15	2031.95	18	-2.2	678.322	3	15.9879	208000	2530000	3103	20210614_HS_50ng_RAW-6.raw	5	P04114|APOB_HUMAN			FALSE
IITHPN(+0.98)FNGNTLDNDIMLIK	59.95	2283.16	20	5.5	762.064	3	25.3561	121000	1070000	5835	20210614_HS_50ng_RAW-15.raw	1	#CONTAM#cont|000144|;#CONTAM#cont|000142|;#CONTAM#cont|000023|;#CONTAM#cont|000143|;#CONTAM#cont|000141|;#CONTAM#cont|000040|;#CONTAM#cont|000032|	Deamidation (NQ)	N6:Deamidation (NQ):0.00	FALSE
IITHPNFN(+0.98)GNTLDNDIM(+15.99)LIK	52	2299.15	20	1.1	767.392	3	24.2058	1980000	11200000	6038	20210614_HS_50ng_RAW-1.raw	3	#CONTAM#cont|000144|;#CONTAM#cont|000142|;#CONTAM#cont|000023|;#CONTAM#cont|000143|;#CONTAM#cont|000141|;#CONTAM#cont|000040|;#CONTAM#cont|000032|	Deamidation (NQ); Oxidation (M)	N8:Deamidation (NQ):0.00;M17:Oxidation (M):1000.00	FALSE
IITHPNFN(+0.98)GNTLDNDIMLIK	48.28	2283.16	20	6.8	762.063	3	25.852	88000	776000	5644	20210614_HS_50ng_RAW-2.raw	1	#CONTAM#cont|000144|;#CONTAM#cont|000142|;#CONTAM#cont|000023|;#CONTAM#cont|000143|;#CONTAM#cont|000141|;#CONTAM#cont|000040|;#CONTAM#cont|000032|	Deamidation (NQ)	N8:Deamidation (NQ):8.22	FALSE
IITHPNFNGNTLDNDIM(+15.99)LIK	69.61	2298.17	20	1.6	767.064	3	24.1394	2410000	25000000	5588	20210614_HS_50ng_RAW-3.raw	14	#CONTAM#cont|000144|;#CONTAM#cont|000142|;#CONTAM#cont|000023|;#CONTAM#cont|000143|;#CONTAM#cont|000141|;#CONTAM#cont|000040|;#CONTAM#cont|000032|	Oxidation (M)		FALSE
IITHPNFNGNTLDNDIMLIK	74.38	2282.17	20	-2.6	761.73	3	25.1848	1640000	17100000	5916	20210614_HS_50ng_RAW-5.raw	14	#CONTAM#cont|000144|;#CONTAM#cont|000142|;#CONTAM#cont|000023|;#CONTAM#cont|000143|;#CONTAM#cont|000141|;#CONTAM#cont|000040|;#CONTAM#cont|000032|			FALSE
ILDDLSPR	35.02	927.503	8	-0.7	464.757	2	14.0766	2080000	4600000	2705	20210614_HS_50ng_RAW-2.raw	12	Q14624|ITIH4_HUMAN;B7ZKJ8|B7ZKJ8_HUMAN;H7C0L5|H7C0L5_HUMAN			FALSE
ILGGHLDAK	34.51	922.524	9	-3.8	462.267	2	6.2782	4070000	12700000	1167	20210614_HS_50ng_RAW-13.raw	19	P00738|HPT_HUMAN;A0A087WU08|A0A087WU08_HUMAN;H0Y300|H0Y300_HUMAN;A0A0C4DGL8|A0A0C4DGL8_HUMAN;J3QR68|J3QR68_HUMAN			FALSE
ILLQGTPVAQM(+15.99)TEDAVDAER	69.31	2172.07	20	-0.9	725.031	3	20.9951	5870000	62500000	4687	20210614_HS_50ng_RAW-5.raw	30	P01024|CO3_HUMAN	Oxidation (M)		FALSE
ILLQGTPVAQMTEDAVDAER	74.92	2156.08	20	-5.7	719.696	3	24.5315	8020000	74300000	5750	20210614_HS_50ng_RAW-5.raw	30	P01024|CO3_HUMAN			FALSE
IM(+15.99)N(+0.98)GEADAMSLDGGFVYIAGK	49	2174.99	21	4.4	1088.51	2	23.3238	403000	4130000	5794	20210614_HS_50ng_RAW-1.raw	7	P02787|TRFE_HUMAN	Oxidation (M); Deamidation (NQ)	M2:Oxidation (M):0.00;N3:Deamidation (NQ):1000.00	FALSE
IMN(+0.98)GEADAM(+15.99)SLDGGFVYIAGK	40.61	2174.99	21	2.7	1088.5	2	23.5056	60600	624000	5634	20210614_HS_50ng_RAW-10.raw	1	P02787|TRFE_HUMAN	Deamidation (NQ); Oxidation (M)	N3:Deamidation (NQ):1000.00;M9:Oxidation (M):0.00	FALSE
IMN(+0.98)GEADAMSLDGGFVYIAGK	61.83	2158.99	21	2.3	1080.51	2	25.4241	110000	753000	5891	20210614_HS_50ng_RAW-3.raw	1	P02787|TRFE_HUMAN	Deamidation (NQ)		FALSE
IPIEDGSGEVVLSR	73.85	1469.77	14	0.4	735.894	2	18.2472	31500000	260000000	4102	20210614_HS_50ng_RAW-1.raw	36	P01024|CO3_HUMAN			FALSE
IPLDLVPK	43.29	893.559	8	-3.6	447.785	2	20.1731	574000	7190000	4445	20210614_HS_50ng_RAW-5.raw	15	P01031|CO5_HUMAN			FALSE
IPSVQINFK	60.77	1044.6	9	2.8	523.307	2	20.5928	5800000	58800000	4569	20210614_HS_50ng_RAW-5.raw	15	P04114|APOB_HUMAN			FALSE
IPTTFEN(+0.98)GR	44.12	1034.5	9	-0.7	518.259	2	7.8664	472000	1600000	1522	20210614_HS_50ng_RAW-12.raw	7	C9JX71|C9JX71_HUMAN;P05090|APOD_HUMAN;C9JF17|C9JF17_HUMAN	Deamidation (NQ)		FALSE
IQNILTEEPK	56.55	1183.64	10	0.9	592.83	2	16.7479	4860000	23400000	3358	20210614_HS_50ng_RAW-5.raw	15	P27169|PON1_HUMAN			FALSE
IQPSGGTNINEALLR	69.7	1581.85	15	1.9	791.933	2	19.3592	9660000	97800000	4177	20210614_HS_50ng_RAW-4.raw	15	#CONTAM#cont|000108|;Q5T985|Q5T985_HUMAN;P19823|ITIH2_HUMAN			FALSE
ISLPESLK	42.16	885.517	8	-1.6	443.765	2	18.2341	15100000	103000000	3828	20210614_HS_50ng_RAW-4.raw	16	P01024|CO3_HUMAN			FALSE
ISNIPDEYFK	40.8	1224.6	10	4.1	613.311	2	19.3233	87200	1800000	4290	20210614_HS_50ng_RAW-13.raw	2				FALSE
ITENDIQIALDDAK	67.76	1557.79	14	4.8	779.905	2	21.3911	3690000	36100000	4766	20210614_HS_50ng_RAW-3.raw	15	P04114|APOB_HUMAN			FALSE
ITLLSALVETR	59.79	1214.72	11	1.6	608.37	2	25.172	6290000	46900000	5909	20210614_HS_50ng_RAW-5.raw	15	G3V3A0|G3V3A0_HUMAN;P01011|AACT_HUMAN			FALSE
ITLPDFR	41.26	860.476	7	1.9	431.246	2	20.5978	2700000	22600000	4508	20210614_HS_50ng_RAW-6.raw	15	P04114|APOB_HUMAN			FALSE
ITQVLHFTK	26.09	1085.62	9	1.9	543.82	2	16.7062	230000	1840000	3347	20210614_HS_50ng_RAW-8.raw	4				FALSE
IVIEYVDR	45.76	1005.55	8	-1.1	503.781	2	17.2252	510000	4800000	3616	20210614_HS_50ng_RAW-10.raw	12	G3XAM2|G3XAM2_HUMAN;A0A2R8Y3M9|A0A2R8Y3M9_HUMAN;E7ETH0|E7ETH0_HUMAN;P05156|CFAI_HUMAN			FALSE
IVLGQEQDSYGGK	41.13	1392.69	13	-2.8	697.35	2	7.5834	85200	807000	1617	20210614_HS_50ng_RAW-1.raw	1	P02743|SAMP_HUMAN			FALSE
IVQILPWEQNEQVK	60.19	1722.93	14	1.9	862.474	2	23.7028	3720000	36700000	5527	20210614_HS_50ng_RAW-5.raw	15	A8MUN2|A8MUN2_HUMAN;P04114|APOB_HUMAN			FALSE
IWDVVEK	44.01	887.475	7	-1.8	444.744	2	16.0175	9690000	29500000	3150	20210614_HS_50ng_RAW-5.raw	19	P01024|CO3_HUMAN			FALSE
KAADDTWEPFASGK	51.22	1521.71	14	4.4	761.866	2	17.9153	719000	3640000	3799	20210614_HS_50ng_RAW-12.raw	6	P02766|TTHY_HUMAN;A0A087WT59|A0A087WT59_HUMAN			FALSE
KAEEEHLGILGPQLHADVGDK	77.95	2255.15	21	5.4	564.799	4	20.0172	4230000	46700000	4342	20210614_HS_50ng_RAW-8.raw	15	E9PFZ2|E9PFZ2_HUMAN;H7C5R1|H7C5R1_HUMAN;P00450|CERU_HUMAN			FALSE
KDSGFQMNQLR	40.7	1322.64	11	-2.6	441.886	3	14.4438	145000	732000	2836	20210614_HS_50ng_RAW-12.raw	2	P02787|TRFE_HUMAN			FALSE
KDTVIKPLLVEPEGLEK	52.55	1907.1	17	0.2	477.782	4	21.5198	89600	1740000	5207	20210614_HS_50ng_RAW-1.raw	7	P01023|A2MG_HUMAN			FALSE
KEAGIPEFYDYDVALIK	41.9	1970	17	0.4	657.675	3	25.6956	9700	289000	5977	20210614_HS_50ng_RAW-6.raw	1	H7C5H1|H7C5H1_HUMAN;E7ETN3|E7ETN3_HUMAN;P00751|CFAB_HUMAN;A0A0G2JH38|A0A0G2JH38_HUMAN;B4E1Z4|B4E1Z4_HUMAN			FALSE
KFPSGTFEQVSQLVK	61.24	1693.9	15	6.4	565.644	3	23.3445	7170000	30000000	5109	20210614_HS_50ng_RAW-2.raw	18	D6RBJ7|D6RBJ7_HUMAN;P02774|VTDB_HUMAN;D6RF20|D6RF20_HUMAN;D6RF35|D6RF35_HUMAN			FALSE
KGDTFSC(+57.02)M(+15.99)VGHEALPLAFTQK	83.78	2352.12	21	2.9	589.04	4	22.4423	1330000	14600000	5175	20210614_HS_50ng_RAW-5.raw	13	P01876|IGHA1_HUMAN;A0A286YEY1|A0A286YEY1_HUMAN	Carbamidomethylation; Oxidation (M)	C7:Carbamidomethylation:1000.00	FALSE
KGDTFSC(+57.02)MVGHEALPLAFTQK	70.38	2336.13	21	2.9	779.719	3	24.1684	11500000	90400000	5574	20210614_HS_50ng_RAW-15.raw	29	P01876|IGHA1_HUMAN;A0A286YEY1|A0A286YEY1_HUMAN	Carbamidomethylation	C7:Carbamidomethylation:1000.00	FALSE
KGEWVALNPLR	65.21	1281.72	11	-0.9	428.247	3	21.0224	808000	6720000	5042	20210614_HS_50ng_RAW-1.raw	14	A0A0D9SG88|A0A0D9SG88_HUMAN;P08603|CFAH_HUMAN;Q5TFM2|Q5TFM2_HUMAN			FALSE
KGYTQQLAFR	23.8	1210.65	10	-1.6	606.329	2	14.7547			2908	20210614_HS_50ng_RAW-11.raw	1	P01024|CO3_HUMAN			FALSE
KLSSWVLLMK	56.57	1203.7	10	2.6	602.861	2	24.0016	2430000	16200000	5616	20210614_HS_50ng_RAW-5.raw	15				FALSE
KLVAASQAALGL	59.06	1140.69	12	-1.7	571.35	2	19.5142	42800000	340000000	4529	20210614_HS_50ng_RAW-1.raw	20	A0A087WWT3|A0A087WWT3_HUMAN;P02768|ALBU_HUMAN;C9JKR2|C9JKR2_HUMAN;D6RHD5|D6RHD5_HUMAN;B7WNR0|B7WNR0_HUMAN;H0YA55|H0YA55_HUMAN			FALSE
KPVAFSDYIHPVC(+57.02)LPDR	42.93	2013.01	17	2	672.013	3	23.1887	449000	5500000	5352	20210614_HS_50ng_RAW-8.raw	10	P00734|THRB_HUMAN	Carbamidomethylation	C13:Carbamidomethylation:1000.00	FALSE
KPVDEYKDC(+57.02)HLAQVPSHTVVAR	58.77	2548.29	22	-1.3	510.664	5	17.0479	7890000	78100000	3584	20210614_HS_50ng_RAW-13.raw	14	P02787|TRFE_HUMAN	Carbamidomethylation	C9:Carbamidomethylation:1000.00	FALSE
KPVEEYAN(+0.98)C(+57.02)HLAR	53.37	1586.75	13	7.2	529.928	3	6.372	616000	3940000	1309	20210614_HS_50ng_RAW-1.raw	8	P02787|TRFE_HUMAN	Deamidation (NQ); Carbamidomethylation	C9:Carbamidomethylation:1000.00	FALSE
KPVEEYANC(+57.02)HLAR	61.73	1585.77	13	-3.4	529.595	3	6.1089	16800000	72100000	1309	20210614_HS_50ng_RAW-1.raw	20	P02787|TRFE_HUMAN	Carbamidomethylation	C9:Carbamidomethylation:1000.00	FALSE
KQTALVELVK	49.49	1127.69	10	-2.2	564.852	2	16.4857	191000000	1770000000	3746	20210614_HS_50ng_RAW-1.raw	45	A0A0C4DGB6|A0A0C4DGB6_HUMAN;A0A087WWT3|A0A087WWT3_HUMAN;P02768|ALBU_HUMAN;C9JKR2|C9JKR2_HUMAN;D6RHD5|D6RHD5_HUMAN;B7WNR0|B7WNR0_HUMAN;H0YA55|H0YA55_HUMAN			FALSE
KSASDLTWDNLK	52.67	1376.69	12	2.3	689.356	2	17.8459	4340000	35900000	3669	20210614_HS_50ng_RAW-15.raw	30	H7C5E8|H7C5E8_HUMAN;P02787|TRFE_HUMAN			FALSE
KVPQVSTPTLVE(+21.98)VSR	42.73	1660.91	15	-1.4	554.644	3	19.5434	20600000	115000000	4198	20210614_HS_50ng_RAW-8.raw	23	A0A0C4DGB6|A0A0C4DGB6_HUMAN;#CONTAM#cont|000097|;#CONTAM#cont|000035|;A0A087WWT3|A0A087WWT3_HUMAN;P02768|ALBU_HUMAN;#CONTAM#cont|000017|;C9JKR2|C9JKR2_HUMAN;D6RHD5|D6RHD5_HUMAN;B7WNR0|B7WNR0_HUMAN;H0YA55|H0YA55_HUMAN	Sodium adduct	E12:Sodium adduct:20.70	FALSE
KVPQVSTPTLVEVSR	85.56	1638.93	15	-9.6	547.312	3	19.2958	883000000	10200000000	4658	20210614_HS_50ng_RAW-1.raw	343	A0A0C4DGB6|A0A0C4DGB6_HUMAN;#CONTAM#cont|000097|;#CONTAM#cont|000035|;A0A087WWT3|A0A087WWT3_HUMAN;P02768|ALBU_HUMAN;#CONTAM#cont|000017|;C9JKR2|C9JKR2_HUMAN;D6RHD5|D6RHD5_HUMAN;B7WNR0|B7WNR0_HUMAN;H0YA55|H0YA55_HUMAN			FALSE
KYLYEIAR	57.18	1054.58	8	-1.6	528.297	2	13.7671	37900000	193000000	2997	20210614_HS_50ng_RAW-1.raw	44	A0A0C4DGB6|A0A0C4DGB6_HUMAN;P02768|ALBU_HUMAN;H7C013|H7C013_HUMAN			FALSE
KYTYNYEAESSSGVPGTADSR	53.19	2281.01	21	0.6	761.346	3	16.0032	142000	2720000	3124	20210614_HS_50ng_RAW-6.raw	9	A8MUN2|A8MUN2_HUMAN;A0A669KB70|A0A669KB70_HUMAN;P04114|APOB_HUMAN			FALSE
LAAAVSNFGYDLYR	63.17	1558.78	14	1.5	780.398	2	22.7788	467000	5030000	5276	20210614_HS_50ng_RAW-5.raw	11	I3L4Z0|I3L4Z0_HUMAN;P36955|PEDF_HUMAN;I3L2R7|I3L2R7_HUMAN			FALSE
LAELPADALGPLQR	35.58	1462.81	14	2	732.416	2	22.5313	20000	279000	5207	20210614_HS_50ng_RAW-5.raw	1	P35858|ALS_HUMAN			FALSE
LALWGEHTGQLYSK	52.16	1601.82	14	3.4	534.949	3	20.9497	1460000	12500000	4631	20210614_HS_50ng_RAW-3.raw	15	P04114|APOB_HUMAN			FALSE
LATALSLSNK	51.58	1016.59	10	-2.4	509.299	2	15.1827	1280000	7920000	2945	20210614_HS_50ng_RAW-5.raw	15	P04114|APOB_HUMAN			FALSE
LC(+57.02)M(+15.99)GSGLN(+0.98)LC(+57.02)EPNNK	26.8	1722.74	15	8.2	862.383	2	18.7695			4002	20210614_HS_50ng_RAW-9.raw	1	H7C5E8|H7C5E8_HUMAN;P02787|TRFE_HUMAN	Carbamidomethylation; Oxidation (M); Deamidation (NQ); Carbamidomethylation	C2:Carbamidomethylation:1000.00;M3:Oxidation (M):1000.00;N8:Deamidation (NQ):7.38;C10:Carbamidomethylation:1000.00	FALSE
LC(+57.02)M(+15.99)GSGLNLC(+57.02)EPNNK	52.37	1721.75	15	1.4	861.885	2	16.3013	657000	5780000	3246	20210614_HS_50ng_RAW-5.raw	11	H7C5E8|H7C5E8_HUMAN;P02787|TRFE_HUMAN	Carbamidomethylation; Oxidation (M); Carbamidomethylation	C2:Carbamidomethylation:1000.00;C10:Carbamidomethylation:1000.00	FALSE
LC(+57.02)MGSGLNLC(+57.02)EPNNK	70.64	1705.76	15	1	853.888	2	19.511	7680000	90700000	4178	20210614_HS_50ng_RAW-8.raw	15	H7C5E8|H7C5E8_HUMAN;P02787|TRFE_HUMAN	Carbamidomethylation; Carbamidomethylation	C2:Carbamidomethylation:1000.00;C10:Carbamidomethylation:1000.00	FALSE
LC(+57.02)TVATLR	55.94	932.511	8	-2.2	467.261	2	11.8404	644000000	3070000000	2294	20210614_HS_50ng_RAW-2.raw	229	A0A0C4DGB6|A0A0C4DGB6_HUMAN;A0A087WWT3|A0A087WWT3_HUMAN;P02768|ALBU_HUMAN;H7C013|H7C013_HUMAN	Carbamidomethylation	C2:Carbamidomethylation:1000.00	FALSE
LDAQASFLPK	57.68	1088.59	10	1.5	545.301	2	18.1401	2810000	17100000	4121	20210614_HS_50ng_RAW-1.raw	5	P19827|ITIH1_HUMAN			FALSE
LDELRDEGK	49.69	1073.54	9	-3.7	537.773	2	4.4974	162000000	632000000	585	20210614_HS_50ng_RAW-1.raw	153	A0A0C4DGB6|A0A0C4DGB6_HUMAN;P02768|ALBU_HUMAN;D6RHD5|D6RHD5_HUMAN;B7WNR0|B7WNR0_HUMAN;H0YA55|H0YA55_HUMAN			FALSE
LDTLAQEVALLK	49.35	1312.76	12	1.3	657.388	2	23.9041	87900	867000	5987	20210614_HS_50ng_RAW-1.raw	1				FALSE
LDVTTSIGR	47.65	960.524	9	0.7	481.268	2	14.0345	863000	3240000	2696	20210614_HS_50ng_RAW-2.raw	12	P04114|APOB_HUMAN			FALSE
LEDM(+15.99)EQALSPSVFK	69.51	1608.77	14	4	805.396	2	19.7692	692000	9040000	4273	20210614_HS_50ng_RAW-3.raw	14	P05155|IC1_HUMAN;E9PGN7|E9PGN7_HUMAN	Oxidation (M)		FALSE
LEDMEQALSPSVFK	72.48	1592.78	14	2.9	797.397	2	22.8092	6070000	47200000	5238	20210614_HS_50ng_RAW-8.raw	15	P05155|IC1_HUMAN;E9PGN7|E9PGN7_HUMAN			FALSE
LEIQSQVDSQHVGHSVLTAK	73.36	2175.13	20	1.7	544.79	4	18.2393	1320000	17700000	3817	20210614_HS_50ng_RAW-5.raw	13	P04114|APOB_HUMAN			FALSE
LELHVDGPPPRPQLR	68.13	1722.95	15	-1	431.745	4	19.4567	392000	4740000	4175	20210614_HS_50ng_RAW-8.raw	12	P04217|A1BG_HUMAN			FALSE
LELLSLSK	33.87	901.548	8	1.7	451.782	2	20.5244	57100	615000	4620	20210614_HS_50ng_RAW-7.raw	2	P22792|CPN2_HUMAN			FALSE
LELSVDGAK	35.32	930.502	9	-4	466.257	2	13.7135	1660000	5000000	2643	20210614_HS_50ng_RAW-4.raw	13				FALSE
LENEIQTYR	39.62	1164.58	9	2.5	583.298	2	7.7931	490000	2470000	1486	20210614_HS_50ng_RAW-15.raw	7	#CONTAM#cont|000133|;#CONTAM#cont|000131|;P13645|K1C10_HUMAN;#CONTAM#cont|000129|;#CONTAM#cont|000136|;#CONTAM#cont|000122|;#CONTAM#cont|000130|			FALSE
LEQGENVFLQATDK	78.09	1590.79	14	3.5	796.404	2	19.1651	2220000	21400000	4103	20210614_HS_50ng_RAW-5.raw	14	A0A0A0MSV6|A0A0A0MSV6_HUMAN;P02746|C1QB_HUMAN;D6R934|D6R934_HUMAN			FALSE
LESEETM(+15.99)VLEAHDAQGDVPVTVTVHDFPGK	58.91	3265.54	30	5.8	817.398	4	22.6641	219000	3210000	5279	20210614_HS_50ng_RAW-9.raw	6	P01024|CO3_HUMAN	Oxidation (M)		FALSE
LFLEPTR	32.24	874.491	7	-3.5	438.251	2	15.184	769000	2690000	3246	20210614_HS_50ng_RAW-1.raw	7	P00747|PLMN_HUMAN			FALSE
LGEHNIDVLEGN(+0.98)EQFINAAK	54.88	2211.08	20	5.6	738.038	3	22.1815			5150	20210614_HS_50ng_RAW-7.raw	1	#CONTAM#cont|000144|;#CONTAM#cont|000142|;#CONTAM#cont|000023|;#CONTAM#cont|000143|;#CONTAM#cont|000141|;#CONTAM#cont|000040|;#CONTAM#cont|000032|	Deamidation (NQ)	N12:Deamidation (NQ):22.85	FALSE
LGEHNIDVLEGNEQFIN(+0.98)AAK	66.98	2211.08	20	3.1	738.037	3	21.8467	741000	12800000	4979	20210614_HS_50ng_RAW-5.raw	12	#CONTAM#cont|000144|;#CONTAM#cont|000142|;#CONTAM#cont|000023|;#CONTAM#cont|000143|;#CONTAM#cont|000141|;#CONTAM#cont|000040|;#CONTAM#cont|000032|	Deamidation (NQ)	N17:Deamidation (NQ):47.09	FALSE
LGEHNIDVLEGNEQFINAAK	82.51	2210.1	20	0.3	737.706	3	22.36	42300000	370000000	5229	20210614_HS_50ng_RAW-4.raw	48	#CONTAM#cont|000144|;#CONTAM#cont|000142|;#CONTAM#cont|000023|;#CONTAM#cont|000143|;#CONTAM#cont|000141|;#CONTAM#cont|000040|;#CONTAM#cont|000032|			FALSE
LGEVNTYAGDLQK	57.71	1406.7	13	2.1	704.361	2	16.5044	520000	7250000	3274	20210614_HS_50ng_RAW-3.raw	15	P06727|APOA4_HUMAN			FALSE
LGFTDLFSK	55.25	1026.54	9	-0.4	514.276	2	23.9315	488000	5120000	5539	20210614_HS_50ng_RAW-3.raw	9	P29622|KAIN_HUMAN			FALSE
LGMFNIQHC(+57.02)K	68.69	1246.6	10	0.9	416.539	3	17.7853	977000	8630000	3647	20210614_HS_50ng_RAW-15.raw	14		Carbamidomethylation	C9:Carbamidomethylation:1000.00	FALSE
LGVYELLLK	48.62	1046.64	9	0.9	524.327	2	24.797	5810000	37200000	5812	20210614_HS_50ng_RAW-5.raw	15	Q14624|ITIH4_HUMAN;B7ZKJ8|B7ZKJ8_HUMAN;H7C0L5|H7C0L5_HUMAN			FALSE
LGYVTADGETSGSITC(+57.02)GK	71.73	1814.84	18	-1.5	908.424	2	16.5907	3400000	21800000	3315	20210614_HS_50ng_RAW-5.raw	15	P08603|CFAH_HUMAN	Carbamidomethylation	C16:Carbamidomethylation:1000.00	FALSE
LHTEAQIQEEGTVVELTGR	81.27	2109.07	19	0.7	704.031	3	19.7665	2320000	22500000	4273	20210614_HS_50ng_RAW-15.raw	13	P01023|A2MG_HUMAN			FALSE
LIC(+57.02)QATGFSPR	63.01	1248.63	11	-0.9	625.321	2	16.1917	12300000	61800000	3150	20210614_HS_50ng_RAW-6.raw	16	P01871|IGHM_HUMAN	Carbamidomethylation	C3:Carbamidomethylation:1000.00	FALSE
LIDVISM(+15.99)YR	36.74	1124.59	9	5.2	563.305	2	19.9273	1920000	13100000	4321	20210614_HS_50ng_RAW-3.raw	14	P04114|APOB_HUMAN	Oxidation (M)		FALSE
LISVDTEHSN(+0.98)IYLQNGPDR	44.84	2171.05	19	0.3	724.691	3	19.9377	1890000	18300000	4343	20210614_HS_50ng_RAW-5.raw	5	E9PFZ2|E9PFZ2_HUMAN;P00450|CERU_HUMAN	Deamidation (NQ)	N10:Deamidation (NQ):61.69	FALSE
LISVDTEHSNIYLQN(+0.98)GPDR	54.88	2171.05	19	5.1	724.694	3	20.0741	490000	3570000	4557	20210614_HS_50ng_RAW-13.raw	3	E9PFZ2|E9PFZ2_HUMAN;P00450|CERU_HUMAN	Deamidation (NQ)	N15:Deamidation (NQ):17.01	FALSE
LISVDTEHSNIYLQNGPDR	75.58	2170.07	19	3.7	724.365	3	19.8746	2500000	36900000	4303	20210614_HS_50ng_RAW-8.raw	15	E9PFZ2|E9PFZ2_HUMAN;P00450|CERU_HUMAN			FALSE
LKC(+57.02)DEWSVNSVGK	34.12	1520.73	13	-0.6	761.371	2	16.1152	23700	440000	3327	20210614_HS_50ng_RAW-13.raw	1	P02787|TRFE_HUMAN	Carbamidomethylation	C3:Carbamidomethylation:1000.00	FALSE
LLATLC(+57.02)SAEVC(+57.02)QC(+57.02)AEGK	73.03	1908.87	17	2.3	955.447	2	19.3265	958000	12800000	4129	20210614_HS_50ng_RAW-8.raw	15		Carbamidomethylation; Carbamidomethylation; Carbamidomethylation	C6:Carbamidomethylation:1000.00;C11:Carbamidomethylation:1000.00;C13:Carbamidomethylation:1000.00	FALSE
LLDNWDSVTSTFSK	77.26	1611.78	14	1.1	806.897	2	23.1743	41800000	455000000	5725	20210614_HS_50ng_RAW-1.raw	32	F8W696|F8W696_HUMAN;P02647|APOA1_HUMAN			FALSE
LLDSLPSDTR	49.16	1115.58	10	0.7	558.797	2	15.9177	11500000	63100000	3096	20210614_HS_50ng_RAW-2.raw	28	H9KV48|H9KV48_HUMAN;P05155|IC1_HUMAN;E9PGN7|E9PGN7_HUMAN			FALSE
LLELTGPK	28.92	869.522	8	2.8	435.77	2	16.4976	415000	2580000	3372	20210614_HS_50ng_RAW-4.raw	5	P04217|A1BG_HUMAN;M0R009|M0R009_HUMAN			FALSE
LLIYDASNLETGVPSR	65.07	1746.92	16	3.1	874.468	2	22.3549	707000	9180000	5140	20210614_HS_50ng_RAW-5.raw	13	A0A2Q2TTZ9|A0A2Q2TTZ9_HUMAN			FALSE
LLIYDASNR	50.5	1063.57	9	0.1	532.79	2	15.6815	7460000	20600000	3037	20210614_HS_50ng_RAW-6.raw	20				FALSE
LLIYDASSR	24.8	1036.56	9	0.7	519.285	2	15.7333	86900	504000	3201	20210614_HS_50ng_RAW-12.raw	2				FALSE
LLIYGASSR	35.43	978.55	9	-2.4	490.281	2	14.8264	2710000	7430000	2948	20210614_HS_50ng_RAW-10.raw	11				FALSE
LLIYGASTR	39.6	992.565	9	-2.2	497.289	2	14.8241	5840000	14500000	3140	20210614_HS_50ng_RAW-1.raw	15				FALSE
LLIYWASTR	36.29	1121.62	9	5.4	561.822	2	22.9209	2070000	11300000	5254	20210614_HS_50ng_RAW-3.raw	13	P06312|KV401_HUMAN			FALSE
LLQDEFPGIPSPLDAAVEC(+57.02)HR	65.42	2363.16	21	0.2	788.727	3	26.4287	14600000	96400000	6243	20210614_HS_50ng_RAW-9.raw	15	P02790|HEMO_HUMAN;Q9BS19|Q9BS19_HUMAN	Carbamidomethylation	C19:Carbamidomethylation:1000.00	FALSE
LLSGGNTLHLVSTTK	63.95	1539.86	15	-0.1	514.295	3	18.9934	3820000	37700000	3992	20210614_HS_50ng_RAW-6.raw	15	P04114|APOB_HUMAN			FALSE
LLVVYPWTQR	36.44	1273.72	10	0	637.866	2	24.2501	672000	5200000	5853	20210614_HS_50ng_RAW-10.raw	4	F8W6P5|F8W6P5_HUMAN;E9PFT6|E9PFT6_HUMAN;P02042|HBD_HUMAN;P68871|HBB_HUMAN;A0A2R8Y7R2|A0A2R8Y7R2_HUMAN;E9PEW8|E9PEW8_HUMAN			FALSE
LM(+15.99)NIFLK	41.16	893.505	7	-1.6	447.759	2	18.9349	724000	2930000	4313	20210614_HS_50ng_RAW-1.raw	8	P01024|CO3_HUMAN	Oxidation (M)		FALSE
LMNIFLK	46.84	877.51	7	-2.2	439.761	2	22.011	2840000	26000000	5354	20210614_HS_50ng_RAW-1.raw	15	P01024|CO3_HUMAN			FALSE
LN(+0.98)GEIQALELPQK	50.23	1452.78	13	5.5	727.403	2	20.8575	62400	712000	4704	20210614_HS_50ng_RAW-7.raw	1	P04114|APOB_HUMAN	Deamidation (NQ)	N2:Deamidation (NQ):25.70	FALSE
LNDLEDALQQAK	68.86	1356.69	12	-0.7	679.351	2	18.9746	8830000	77600000	4094	20210614_HS_50ng_RAW-4.raw	15	#CONTAM#cont|000132|;#CONTAM#cont|000135|;#CONTAM#cont|000134|;P04264|K2C1_HUMAN			FALSE
LNGEIQALELPQK	75.02	1451.8	13	3.8	726.909	2	20.5978	543000	7160000	4522	20210614_HS_50ng_RAW-6.raw	14	P04114|APOB_HUMAN			FALSE
LNM(+15.99)GITDLQGLR	61.59	1345.7	12	0.5	673.859	2	19.5048	322000	3420000	4191	20210614_HS_50ng_RAW-3.raw	10		Oxidation (M)		FALSE
LPDATPTELAK	63.55	1154.62	11	-0.6	578.316	2	15.5091	3790000	22400000	3005	20210614_HS_50ng_RAW-8.raw	16	P02774|VTDB_HUMAN;D6RF35|D6RF35_HUMAN			FALSE
LPEC(+57.02)EADDGC(+57.02)PKPPEIAHGYVEHSVR	69.17	2961.34	26	1.4	741.343	4	18.4312	4360000	33900000	3900	20210614_HS_50ng_RAW-9.raw	25	P00738|HPT_HUMAN;J3QLC9|J3QLC9_HUMAN;H0Y300|H0Y300_HUMAN;J3KRH2|J3KRH2_HUMAN;J3QR68|J3QR68_HUMAN	Carbamidomethylation; Carbamidomethylation	C4:Carbamidomethylation:1000.00;C10:Carbamidomethylation:1000.00	FALSE
LPGIVAEGR	47.91	910.524	9	-2.1	456.268	2	13.2938	2830000	6460000	2600	20210614_HS_50ng_RAW-10.raw	15	P01008|ANT3_HUMAN			FALSE
LPLEYSYGEYR	40.9	1388.66	11	1.4	695.339	2	19.5685	179000	2570000	4397	20210614_HS_50ng_RAW-13.raw	7	F5GY80|F5GY80_HUMAN;P07358|CO8B_HUMAN;F5H7G1|F5H7G1_HUMAN			FALSE
LPPNVVEESAR	61.78	1209.64	11	0.6	605.825	2	12.4588	62800000	230000000	2337	20210614_HS_50ng_RAW-8.raw	124	P01023|A2MG_HUMAN			FALSE
LPQQANDYLNSFNWER	44.6	1993.93	16	2.2	997.974	2	24.0309	451000	4780000	5783	20210614_HS_50ng_RAW-10.raw	6	P04114|APOB_HUMAN			FALSE
LPYSVVR	35.69	832.481	7	-3.1	417.246	2	13.2949	5630000	8520000	2557	20210614_HS_50ng_RAW-4.raw	15	P01024|CO3_HUMAN			FALSE
LPYTIITTPPLK	43.29	1355.81	12	-6.6	678.906	2	23.704	401000	4030000	5478	20210614_HS_50ng_RAW-6.raw	2	P04114|APOB_HUMAN			FALSE
LQAILGVPWK	48.92	1123.68	10	4.2	562.847	2	24.3959	871000	8560000	5723	20210614_HS_50ng_RAW-5.raw	14	P01019|ANGT_HUMAN			FALSE
LQDEDLGFL	37.03	1048.51	9	0.7	525.261	2	22.8048	615000	5210000	5219	20210614_HS_50ng_RAW-3.raw	9	H7C5H1|H7C5H1_HUMAN;E7ETN3|E7ETN3_HUMAN;P00751|CFAB_HUMAN;B4E1Z4|B4E1Z4_HUMAN			FALSE
LQDFSDQLSDYYEK	68.19	1749.77	14	3.6	875.897	2	20.7963	1360000	14800000	4629	20210614_HS_50ng_RAW-5.raw	14	P04114|APOB_HUMAN			FALSE
LQHLEN(+0.98)ELTHDIITK	51.22	1803.94	15	-0.1	451.991	4	19.1913	692000	8620000	4145	20210614_HS_50ng_RAW-9.raw	14		Deamidation (NQ)	N6:Deamidation (NQ):7.28	FALSE
LQHLENELTHDIITK	80.47	1802.95	15	0.6	601.992	3	19.793	110000000	1030000000	4284	20210614_HS_50ng_RAW-8.raw	69				FALSE
LQPLDFK	39.01	859.48	7	-0.5	430.746	2	17.9248	2230000	10500000	3668	20210614_HS_50ng_RAW-2.raw	10	P01008|ANT3_HUMAN			FALSE
LQSLFDSPDFSK	60.54	1382.67	12	0.7	692.344	2	21.6315	585000	6320000	4889	20210614_HS_50ng_RAW-5.raw	8	P36955|PEDF_HUMAN			FALSE
LSINTHPSQKPLSITVR	74.1	1890.07	17	-1	473.524	4	19.4661	7200000	108000000	4220	20210614_HS_50ng_RAW-4.raw	31	P01024|CO3_HUMAN			FALSE
LSITGTYDLK	50.18	1109.6	10	-0.5	555.805	2	19.0219	104000000	781000000	3987	20210614_HS_50ng_RAW-6.raw	54				FALSE
LSLEIEQLELQR	58.32	1469.81	12	1.2	735.913	2	24.0564	1690000	20800000	5577	20210614_HS_50ng_RAW-6.raw	14	P04003|C4BPA_HUMAN			FALSE
LSNNALSGLPQGVFGK	67	1600.86	16	1.8	801.437	2	22.9517	541000	6590000	5326	20210614_HS_50ng_RAW-5.raw	11	P22792|CPN2_HUMAN			FALSE
LSNVLQQVK	51.13	1027.6	9	-0.5	514.808	2	15.0967	1700000	6460000	3034	20210614_HS_50ng_RAW-13.raw	15	P04114|APOB_HUMAN			FALSE
LSPIYNLVPVK	52.69	1241.74	11	0.5	621.877	2	23.6606	2930000	28600000	5446	20210614_HS_50ng_RAW-3.raw	15	P02748|CO9_HUMAN			FALSE
LSSPATLNSR	55.27	1044.56	10	-2.9	523.284	2	6.6055	15900000	69000000	1222	20210614_HS_50ng_RAW-5.raw	61	#CONTAM#cont|000142|;#CONTAM#cont|000023|;#CONTAM#cont|000143|;#CONTAM#cont|000141|;#CONTAM#cont|000040|;#CONTAM#cont|000032|			FALSE
LSSPAVITDK	44.21	1029.57	10	-2.1	515.792	2	7.6801	1720000	2870000	1637	20210614_HS_50ng_RAW-1.raw	8	P00747|PLMN_HUMAN			FALSE
LSSVTAADTAVYYC(+57.02)AR	69.2	1746.82	16	2.3	874.422	2	18.8867	843000	11400000	3982	20210614_HS_50ng_RAW-8.raw	13		Carbamidomethylation	C14:Carbamidomethylation:1000.00	FALSE
LSSWVLLMK	58.01	1075.61	9	1.8	538.813	2	24.6807	10500000	66800000	6166	20210614_HS_50ng_RAW-1.raw	15				FALSE
LTISEQNIQR	52.05	1200.65	10	-0.2	601.33	2	14.2534	4060000	13300000	2817	20210614_HS_50ng_RAW-13.raw	15	A8MUN2|A8MUN2_HUMAN;P04114|APOB_HUMAN			FALSE
LTLDIQNK	43.71	943.534	8	-2.1	472.773	2	15.0409	1120000	4220000	2891	20210614_HS_50ng_RAW-3.raw	15	P04114|APOB_HUMAN			FALSE
LTPLYELVK	39.66	1074.63	9	1.8	538.324	2	22.8316	196000	1680000	5266	20210614_HS_50ng_RAW-8.raw	5	P10643|CO7_HUMAN			FALSE
LVAASQAALGL	55.53	1012.59	11	-5.2	507.3	2	20.0216	171000000	1630000000	4899	20210614_HS_50ng_RAW-1.raw	190	A0A087WWT3|A0A087WWT3_HUMAN;P02768|ALBU_HUMAN;C9JKR2|C9JKR2_HUMAN;D6RHD5|D6RHD5_HUMAN;B7WNR0|B7WNR0_HUMAN;H0YA55|H0YA55_HUMAN			FALSE
LVAASQAALGL(+21.98)	44.47	1034.57	11	-2.4	518.293	2	19.9609	83000000	744000000	4686	20210614_HS_50ng_RAW-1.raw	21	A0A087WWT3|A0A087WWT3_HUMAN;P02768|ALBU_HUMAN;C9JKR2|C9JKR2_HUMAN;D6RHD5|D6RHD5_HUMAN;B7WNR0|B7WNR0_HUMAN;H0YA55|H0YA55_HUMAN	Sodium adduct		FALSE
LVDKFLEDVK	48.63	1204.67	10	5.1	603.346	2	19.2747	961000	11900000	4175	20210614_HS_50ng_RAW-4.raw	11				FALSE
LVDKFLEDVKK	53.35	1332.77	11	-1	445.262	3	18.1222	1270000	12800000	3779	20210614_HS_50ng_RAW-5.raw	12				FALSE
LVGFIDDAVK	36.05	1075.59	10	1.8	538.804	2	20.131	81400	1320000	4451	20210614_HS_50ng_RAW-14.raw	2	P04114|APOB_HUMAN			FALSE
LVHVEEPHTETVR	45.44	1544.79	13	-6.1	515.936	3	7.0693	3190000	7360000	1474	20210614_HS_50ng_RAW-1.raw	7	P01023|A2MG_HUMAN			FALSE
LVN(+0.98)EVTEFAK	58.99	1149.59	10	2.1	575.804	2	16.5904	59200000	301000000	3276	20210614_HS_50ng_RAW-15.raw	18	A0A0C4DGB6|A0A0C4DGB6_HUMAN;A0A087WWT3|A0A087WWT3_HUMAN;P02768|ALBU_HUMAN;H7C013|H7C013_HUMAN	Deamidation (NQ)		FALSE
LVNELTEFAK	44.52	1162.62	10	-0.7	582.318	2	16.733	1930000	19300000	3843	20210614_HS_50ng_RAW-1.raw	6	#CONTAM#cont|000097|;#CONTAM#cont|000035|;#CONTAM#cont|000017|			FALSE
LVNEVTE(+21.98)FAK	58.57	1170.59	10	-1.7	586.301	2	17.3025	21700000	109000000	3491	20210614_HS_50ng_RAW-3.raw	16	A0A0C4DGB6|A0A0C4DGB6_HUMAN;A0A087WWT3|A0A087WWT3_HUMAN;P02768|ALBU_HUMAN;H7C013|H7C013_HUMAN	Sodium adduct	E7:Sodium adduct:44.44	FALSE
LVNEVTEFAK	68.57	1148.61	10	-0.1	575.311	2	18.7237	540000000	4560000000	4271	20210614_HS_50ng_RAW-1.raw	383	A0A0C4DGB6|A0A0C4DGB6_HUMAN;A0A087WWT3|A0A087WWT3_HUMAN;P02768|ALBU_HUMAN;H7C013|H7C013_HUMAN			FALSE
LVRPEVDVM(+15.99)C(+57.02)TAFHD(+21.98)NEETFLK	30.99	2687.23	22	-8.6	538.449	5	24.8235	86500	911000	5772	20210614_HS_50ng_RAW-6.raw	2	A0A0C4DGB6|A0A0C4DGB6_HUMAN;A0A087WWT3|A0A087WWT3_HUMAN;P02768|ALBU_HUMAN;H7C013|H7C013_HUMAN	Oxidation (M); Carbamidomethylation; Sodium adduct	M9:Oxidation (M):1000.00;C10:Carbamidomethylation:1000.00;D15:Sodium adduct:0.00	FALSE
LVRPEVDVM(+15.99)C(+57.02)TAFHDN(+0.98)EETFLK	52.29	2666.24	22	6.4	667.57	4	24.4234	8280000	20500000	5834	20210614_HS_50ng_RAW-11.raw	26	A0A0C4DGB6|A0A0C4DGB6_HUMAN;A0A087WWT3|A0A087WWT3_HUMAN;P02768|ALBU_HUMAN;H7C013|H7C013_HUMAN	Oxidation (M); Carbamidomethylation; Deamidation (NQ)	C10:Carbamidomethylation:1000.00	FALSE
LVRPEVDVM(+15.99)C(+57.02)TAFHDN(+0.98)EETFLKK	35.4	2794.33	23	7.7	699.595	4	23.7528	13900	303000	5717	20210614_HS_50ng_RAW-10.raw	1	A0A0C4DGB6|A0A0C4DGB6_HUMAN;A0A087WWT3|A0A087WWT3_HUMAN;P02768|ALBU_HUMAN;H7C013|H7C013_HUMAN	Oxidation (M); Carbamidomethylation; Deamidation (NQ)	C10:Carbamidomethylation:1000.00	FALSE
LVRPEVDVM(+15.99)C(+57.02)TAFHDNEETFLK	98.61	2665.25	22	-0.9	667.32	4	24.1625	185000000	1100000000	5732	20210614_HS_50ng_RAW-5.raw	159	A0A0C4DGB6|A0A0C4DGB6_HUMAN;A0A087WWT3|A0A087WWT3_HUMAN;P02768|ALBU_HUMAN;H7C013|H7C013_HUMAN	Oxidation (M); Carbamidomethylation	C10:Carbamidomethylation:1000.00	FALSE
LVRPEVDVM(+15.99)C(+57.02)TAFHDNEETFLKK	84.88	2793.35	23	3.6	559.679	5	21.5305	8540000	103000000	4832	20210614_HS_50ng_RAW-8.raw	27	A0A0C4DGB6|A0A0C4DGB6_HUMAN;A0A087WWT3|A0A087WWT3_HUMAN;P02768|ALBU_HUMAN;H7C013|H7C013_HUMAN	Oxidation (M); Carbamidomethylation	C10:Carbamidomethylation:1000.00	FALSE
LVRPEVDVMC(+57.02)TAFHD(+21.98)NEETFLK	38.87	2671.24	22	2.2	891.422	3	24.7677	151000	2600000	5772	20210614_HS_50ng_RAW-14.raw	3	A0A0C4DGB6|A0A0C4DGB6_HUMAN;A0A087WWT3|A0A087WWT3_HUMAN;P02768|ALBU_HUMAN;H7C013|H7C013_HUMAN	Carbamidomethylation; Sodium adduct	C10:Carbamidomethylation:1000.00;D15:Sodium adduct:6.59	FALSE
LVRPEVDVMC(+57.02)TAFHDN(+0.98)E(+21.98)ETFLK	36.05	2672.22	22	1.5	891.75	3	24.6988	115000	1810000	5910	20210614_HS_50ng_RAW-11.raw	3	A0A0C4DGB6|A0A0C4DGB6_HUMAN;A0A087WWT3|A0A087WWT3_HUMAN;P02768|ALBU_HUMAN;H7C013|H7C013_HUMAN	Carbamidomethylation; Deamidation (NQ); Sodium adduct	C10:Carbamidomethylation:1000.00;N16:Deamidation (NQ):1000.00;E17:Sodium adduct:0.00	FALSE
LVRPEVDVMC(+57.02)TAFHDN(+0.98)EETFLK	57.72	2650.24	22	5.4	663.571	4	26.5399	61400000	582000000	6388	20210614_HS_50ng_RAW-9.raw	36	A0A0C4DGB6|A0A0C4DGB6_HUMAN;A0A087WWT3|A0A087WWT3_HUMAN;P02768|ALBU_HUMAN;H7C013|H7C013_HUMAN	Carbamidomethylation; Deamidation (NQ)	C10:Carbamidomethylation:1000.00	FALSE
LVRPEVDVMC(+57.02)TAFHDN(+0.98)EETFLKK	53.44	2778.34	23	1.4	695.592	4	23.6862	251000	5110000	5611	20210614_HS_50ng_RAW-12.raw	3	A0A0C4DGB6|A0A0C4DGB6_HUMAN;A0A087WWT3|A0A087WWT3_HUMAN;P02768|ALBU_HUMAN;H7C013|H7C013_HUMAN	Carbamidomethylation; Deamidation (NQ)	C10:Carbamidomethylation:1000.00	FALSE
LVRPEVDVMC(+57.02)TAFHDNE(+21.98)ETFLK	52.43	2671.24	22	-2.8	891.418	3	24.7906	556000	5760000	5816	20210614_HS_50ng_RAW-5.raw	11	A0A0C4DGB6|A0A0C4DGB6_HUMAN;A0A087WWT3|A0A087WWT3_HUMAN;P02768|ALBU_HUMAN;H7C013|H7C013_HUMAN	Carbamidomethylation; Sodium adduct	C10:Carbamidomethylation:1000.00;E17:Sodium adduct:0.00	FALSE
LVRPEVDVMC(+57.02)TAFHDNEETFLK	121.03	2649.26	22	-9.3	663.315	4	24.7815	271000000	2780000000	5879	20210614_HS_50ng_RAW-8.raw	238	A0A0C4DGB6|A0A0C4DGB6_HUMAN;A0A087WWT3|A0A087WWT3_HUMAN;P02768|ALBU_HUMAN;H7C013|H7C013_HUMAN	Carbamidomethylation	C10:Carbamidomethylation:1000.00	FALSE
LVRPEVDVMC(+57.02)TAFHDNEETFLKK	94.19	2777.35	23	-0.1	556.477	5	23.8186	52500000	513000000	5581	20210614_HS_50ng_RAW-4.raw	71	A0A0C4DGB6|A0A0C4DGB6_HUMAN;A0A087WWT3|A0A087WWT3_HUMAN;P02768|ALBU_HUMAN;H7C013|H7C013_HUMAN	Carbamidomethylation	C10:Carbamidomethylation:1000.00	FALSE
LWWLDLK	39.53	972.543	7	-0.8	487.279	2	26.9801	3520000	15500000	6719	20210614_HS_50ng_RAW-1.raw	14	P02790|HEMO_HUMAN			FALSE
LYGSEAFATDFQDSAAAK	79.74	1890.86	18	-0.7	946.438	2	20.7899	13600000	107000000	4946	20210614_HS_50ng_RAW-1.raw	21	G3V595|G3V595_HUMAN;P01011|AACT_HUMAN			FALSE
LYHSEAFTVN(+0.98)FGDTEEAK	50.11	2057.92	18	6.9	686.986	3	21.681	1160000	6890000	4858	20210614_HS_50ng_RAW-15.raw	9		Deamidation (NQ)		FALSE
LYHSEAFTVNFGDTEEAK	81.51	2056.94	18	-9.1	686.647	3	21.1025	7740000	108000000	4744	20210614_HS_50ng_RAW-5.raw	39				FALSE
LYHSEAFTVNFGDTEEAKK	76.54	2185.03	19	0.1	729.352	3	20.3248	2860000	23400000	4520	20210614_HS_50ng_RAW-4.raw	13				FALSE
M(+15.99)EEVEAMLLPETLK	46.47	1647.81	14	1.6	824.914	2	24.0362	817000	5670000	5556	20210614_HS_50ng_RAW-3.raw	14	G3V595|G3V595_HUMAN;G3V3A0|G3V3A0_HUMAN;P01011|AACT_HUMAN	Oxidation (M)	M1:Oxidation (M):41.57	FALSE
M(+15.99)FLSFPTTK	25.66	1086.54	9	4.2	544.28	2	20.6134	28100	343000	4718	20210614_HS_50ng_RAW-10.raw	1	P69905|HBA_HUMAN;G3V1N2|G3V1N2_HUMAN;A0A2R8Y7C0|A0A2R8Y7C0_HUMAN	Oxidation (M)		FALSE
M(+15.99)FTTAPDQVDKEDEDFQESNK	58.43	2489.05	21	0.5	830.692	3	16.9591	1420000	16700000	3487	20210614_HS_50ng_RAW-12.raw	14	E9PFZ2|E9PFZ2_HUMAN;H7C5R1|H7C5R1_HUMAN;P00450|CERU_HUMAN	Oxidation (M)		FALSE
M(+15.99)PGTVATLR	39.82	960.506	9	0	481.26	2	19.1393	2150000	18500000	4172	20210614_HS_50ng_RAW-12.raw	10		Oxidation (M)		FALSE
M(+15.99)TSNFPVDLSDYPK	69.36	1628.74	14	2.3	815.379	2	21.3456	4260000	33200000	4763	20210614_HS_50ng_RAW-8.raw	15	P04114|APOB_HUMAN	Oxidation (M)		FALSE
M(+15.99)VSGFIPLKPTVK	47.16	1431.82	13	1.5	478.28	3	20.6151	2640000	16400000	4531	20210614_HS_50ng_RAW-3.raw	16	P01023|A2MG_HUMAN;P20742|PZP_HUMAN	Oxidation (M)		FALSE
M(+15.99)YLGYEYVTAIR	69.7	1493.72	12	1.2	747.869	2	22.0836	4290000	28000000	4998	20210614_HS_50ng_RAW-3.raw	30	P02787|TRFE_HUMAN	Oxidation (M)		FALSE
M(+15.99)YQM(+15.99)DIQQELQR	63.56	1613.72	12	0.2	807.866	2	16.518	1140000	7710000	3258	20210614_HS_50ng_RAW-6.raw	15	P04114|APOB_HUMAN	Oxidation (M); Oxidation (M)		FALSE
MC(+57.02)PQLQQYEM(+15.99)HGPEGLR	41.52	2088.92	17	0.7	697.314	3	18.7875	1340000	17100000	4110	20210614_HS_50ng_RAW-10.raw	11	P01023|A2MG_HUMAN	Carbamidomethylation; Oxidation (M)	C2:Carbamidomethylation:1000.00;M10:Oxidation (M):32.47	FALSE
MC(+57.02)PQLQQYEMHGPEGLR	65.67	2072.92	17	0.3	691.982	3	20.3119	5340000	51000000	4483	20210614_HS_50ng_RAW-5.raw	16	P01023|A2MG_HUMAN	Carbamidomethylation	C2:Carbamidomethylation:1000.00	FALSE
MEEVEAM(+15.99)LLPETLK	66.51	1647.81	14	3.8	824.915	2	22.769	501000	6720000	5218	20210614_HS_50ng_RAW-6.raw	12	G3V595|G3V595_HUMAN;G3V3A0|G3V3A0_HUMAN;P01011|AACT_HUMAN	Oxidation (M)	M7:Oxidation (M):53.33	FALSE
MEEVEAMLLPETLK	72.56	1631.81	14	1.2	816.916	2	25.0276	4520000	33200000	6259	20210614_HS_50ng_RAW-1.raw	16	G3V595|G3V595_HUMAN;G3V3A0|G3V3A0_HUMAN;P01011|AACT_HUMAN			FALSE
MFLSFPTTK	61	1070.55	9	0.6	536.281	2	22.4707	2220000	15600000	5149	20210614_HS_50ng_RAW-8.raw	15	P69905|HBA_HUMAN;G3V1N2|G3V1N2_HUMAN;A0A2R8Y7C0|A0A2R8Y7C0_HUMAN			FALSE
MFTTAPDQVDKEDEDFQESNK	85.98	2473.06	21	1.9	825.362	3	18.0833	10100000	97300000	3763	20210614_HS_50ng_RAW-5.raw	15	E9PFZ2|E9PFZ2_HUMAN;H7C5R1|H7C5R1_HUMAN;P00450|CERU_HUMAN			FALSE
MLADAPPQDPSC(+57.02)C(+57.02)SGALYYGSK	42.85	2387.02	22	0	796.682	3	19.3822	480000	5670000	4156	20210614_HS_50ng_RAW-8.raw	9	Q5T985|Q5T985_HUMAN;P19823|ITIH2_HUMAN	Carbamidomethylation; Carbamidomethylation	C12:Carbamidomethylation:1000.00;C13:Carbamidomethylation:1000.00	FALSE
MNTVIAALSR	73.39	1074.59	10	4.3	538.302	2	19.2991	811000	6860000	4151	20210614_HS_50ng_RAW-5.raw	10	P08185|CBG_HUMAN			FALSE
MPGTVATLR	46.35	944.511	9	-3.4	473.261	2	15.5408	1720000	3010000	3390	20210614_HS_50ng_RAW-1.raw	13				FALSE
MRPSTDTITVMVENSHGLR	63.97	2143.05	19	3.9	536.772	4	21.1123	204000	3010000	4893	20210614_HS_50ng_RAW-13.raw	7				FALSE
MSAVEGIC(+57.02)TSESPVIDHQGTK	76.39	2245.04	21	2	749.354	3	18.5121	538000	7810000	3873	20210614_HS_50ng_RAW-3.raw	14	P01031|CO5_HUMAN	Carbamidomethylation	C8:Carbamidomethylation:1000.00	FALSE
MTLDDFR	36.09	896.406	7	-0.4	449.21	2	16.8	367000	2550000	3420	20210614_HS_50ng_RAW-9.raw	12	K7EQQ3|K7EQQ3_HUMAN;P35527|K1C9_HUMAN			FALSE
MTVTDQVNC(+57.02)PK	47.86	1291.59	11	-2.5	646.801	2	7.0063	78100	932000	1302	20210614_HS_50ng_RAW-14.raw	4	P05090|APOD_HUMAN;C9JF17|C9JF17_HUMAN	Carbamidomethylation	C9:Carbamidomethylation:1000.00	FALSE
MVSGFIPLKPTVK	61.19	1415.82	13	-1.1	472.947	3	21.5424	5350000	40600000	5215	20210614_HS_50ng_RAW-1.raw	29	P01023|A2MG_HUMAN;P20742|PZP_HUMAN			FALSE
MYLGYEYVTAIR	71.32	1477.73	12	-4	739.868	2	23.6025	13400000	99200000	5511	20210614_HS_50ng_RAW-4.raw	29	P02787|TRFE_HUMAN			FALSE
N(+0.98)EC(+57.02)FLQHKDDNPNLPR	26.16	1996.91	16	9.8	666.649	3	16.9694	18300	322000	3399	20210614_HS_50ng_RAW-15.raw	1	A0A0C4DGB6|A0A0C4DGB6_HUMAN;A0A087WWT3|A0A087WWT3_HUMAN;P02768|ALBU_HUMAN;H7C013|H7C013_HUMAN	Deamidation (NQ); Carbamidomethylation	N1:Deamidation (NQ):0.00;C3:Carbamidomethylation:1000.00	FALSE
N(+0.98)EDSLVFVQTDK	40.46	1394.66	12	5.5	698.339	2	18.6652	19600	406000	4111	20210614_HS_50ng_RAW-13.raw	1	P01023|A2MG_HUMAN;F8W7L3|F8W7L3_HUMAN	Deamidation (NQ)	N1:Deamidation (NQ):53.45	FALSE
N(+0.98)GVAQEPVHLDSPAIK	55.45	1674.86	16	-0.8	559.293	3	18.5503	1860000	17600000	4216	20210614_HS_50ng_RAW-1.raw	5	P04217|A1BG_HUMAN;M0R009|M0R009_HUMAN	Deamidation (NQ)	N1:Deamidation (NQ):20.17	FALSE
N(+0.98)QVSLTC(+57.02)LVK	25.19	1161.61	10	3.7	581.811	2	22.073	6350	149000	4794	20210614_HS_50ng_RAW-2.raw	1	P01859|IGHG2_HUMAN;A0A4W9A917|A0A4W9A917_HUMAN;P01857|IGHG1_HUMAN;P01860|IGHG3_HUMAN;A0A286YEY4|A0A286YEY4_HUMAN;A0A0A0MS08|A0A0A0MS08_HUMAN;A0A0A0MS07|A0A0A0MS07_HUMAN;A0A286YES1|A0A286YES1_HUMAN	Deamidation (NQ); Carbamidomethylation	N1:Deamidation (NQ):0.00;C7:Carbamidomethylation:1000.00	FALSE
NDFTWFK	37.49	956.439	7	1.8	479.228	2	21.3685	937000	7080000	4765	20210614_HS_50ng_RAW-3.raw	13	P08603|CFAH_HUMAN			FALSE
NEC(+57.02)FLQHK	45.77	1074.49	8	-1.3	538.251	2	6.1959	58400000	134000000	1434	20210614_HS_50ng_RAW-2.raw	68	A0A0C4DGB6|A0A0C4DGB6_HUMAN;A0A087WWT3|A0A087WWT3_HUMAN;P02768|ALBU_HUMAN;H7C013|H7C013_HUMAN	Carbamidomethylation	C3:Carbamidomethylation:1000.00	FALSE
NEC(+57.02)FLQHKDDNPNLPR	64.57	1995.92	16	-3.6	499.986	4	15.6531	23600000	153000000	3361	20210614_HS_50ng_RAW-1.raw	35	A0A0C4DGB6|A0A0C4DGB6_HUMAN;A0A087WWT3|A0A087WWT3_HUMAN;P02768|ALBU_HUMAN;H7C013|H7C013_HUMAN	Carbamidomethylation	C3:Carbamidomethylation:1000.00	FALSE
NEDSLVFVQTDK	69.64	1393.67	12	-0.2	697.843	2	17.5863	26800000	176000000	4096	20210614_HS_50ng_RAW-1.raw	21	P01023|A2MG_HUMAN;F8W7L3|F8W7L3_HUMAN			FALSE
NFPSPVDAAFR	69.53	1219.6	11	-2.8	610.805	2	20.9218	43300000	466000000	4696	20210614_HS_50ng_RAW-4.raw	43	P02790|HEMO_HUMAN;Q9BS19|Q9BS19_HUMAN			FALSE
NGVAQEPVHLDSPAIK	73.95	1673.87	16	4.1	558.967	3	18.2036	1940000	22000000	3749	20210614_HS_50ng_RAW-6.raw	15	P04217|A1BG_HUMAN;M0R009|M0R009_HUMAN			FALSE
NIILPVYDK	62.32	1073.61	9	4.6	537.816	2	20.4305	3800000	30200000	4524	20210614_HS_50ng_RAW-5.raw	15	P04114|APOB_HUMAN			FALSE
NILTSNNIDVK	53.51	1229.66	11	-0.9	615.837	2	17.4971	4980000	30000000	3511	20210614_HS_50ng_RAW-6.raw	15	P05090|APOD_HUMAN;C9JF17|C9JF17_HUMAN			FALSE
NLAVSQVVHK	43.58	1093.62	10	-1.6	547.819	2	7.2281	3400000	7820000	1478	20210614_HS_50ng_RAW-1.raw	11	G3V3A0|G3V3A0_HUMAN;P01011|AACT_HUMAN			FALSE
NLNEKDYELLC(+57.02)LDGTR	65.01	1951.93	16	-3.8	651.648	3	21.6188	8420000	70700000	4851	20210614_HS_50ng_RAW-8.raw	18	P02787|TRFE_HUMAN	Carbamidomethylation	C11:Carbamidomethylation:1000.00	FALSE
NLQNNAEWVYQGAIR	72.45	1774.88	15	2.2	888.447	2	21.5302	1010000	11800000	4886	20210614_HS_50ng_RAW-4.raw	15	P04114|APOB_HUMAN			FALSE
NNALDFVTK	49.17	1020.52	9	1.6	511.269	2	17.2503	212000	1080000	3481	20210614_HS_50ng_RAW-2.raw	2	P04114|APOB_HUMAN			FALSE
NPDGDVGGPWC(+57.02)YTTNPR	59.17	1904.81	17	3.8	953.417	2	19.0055	676000	7080000	4201	20210614_HS_50ng_RAW-13.raw	11	P00747|PLMN_HUMAN	Carbamidomethylation	C11:Carbamidomethylation:1000.00	FALSE
NPDSSTTGPWC(+57.02)YTTDPTVR	41.54	2153.93	19	0.2	1077.97	2	19.7474	226000	3000000	4250	20210614_HS_50ng_RAW-6.raw	5	C9JV37|C9JV37_HUMAN;P00734|THRB_HUMAN;E9PIT3|E9PIT3_HUMAN	Carbamidomethylation	C11:Carbamidomethylation:1000.00	FALSE
NPLVWVHASPEHVVVTR	65.48	1939.04	17	1.8	485.769	4	21.5996	263000	2920000	4843	20210614_HS_50ng_RAW-6.raw	7	Q14624|ITIH4_HUMAN;B7ZKJ8|B7ZKJ8_HUMAN;H7C0L5|H7C0L5_HUMAN			FALSE
NPN(+0.98)GYSFSIPVK	64.95	1322.65	12	-1.8	662.331	2	20.6907	2050000	17100000	4916	20210614_HS_50ng_RAW-1.raw	15	P04114|APOB_HUMAN	Deamidation (NQ)	N3:Deamidation (NQ):36.05	FALSE
NPNGYSFSIPVK	55.62	1321.67	12	1.8	661.842	2	20.8028	122000	1380000	4667	20210614_HS_50ng_RAW-5.raw	4	P04114|APOB_HUMAN			FALSE
NPNLPPETVDSLK	44.67	1422.74	13	3.1	712.377	2	17.8696	3320000	19700000	3804	20210614_HS_50ng_RAW-13.raw	19	P05090|APOD_HUMAN;C9JF17|C9JF17_HUMAN			FALSE
NQ(+0.98)VSLTC(+57.02)LVK	55.69	1161.61	10	2.4	581.812	2	19.9777	3190000	39200000	4395	20210614_HS_50ng_RAW-5.raw	8	P01859|IGHG2_HUMAN;A0A4W9A917|A0A4W9A917_HUMAN;P01857|IGHG1_HUMAN;P01860|IGHG3_HUMAN;A0A286YEY4|A0A286YEY4_HUMAN;A0A0A0MS08|A0A0A0MS08_HUMAN;A0A0A0MS07|A0A0A0MS07_HUMAN;A0A286YES1|A0A286YES1_HUMAN	Deamidation (NQ); Carbamidomethylation	Q2:Deamidation (NQ):0.00;C7:Carbamidomethylation:1000.00	FALSE
NQGNTWLTAFVLK	66.33	1490.79	13	3.6	746.404	2	27.2393	2900000	22400000	6388	20210614_HS_50ng_RAW-4.raw	14	P01023|A2MG_HUMAN;P20742|PZP_HUMAN			FALSE
NQVSLTC(+57.02)LVK	62.98	1160.62	10	-5.1	581.316	2	19.2328	135000000	990000000	4174	20210614_HS_50ng_RAW-5.raw	88	P01859|IGHG2_HUMAN;A0A4W9A917|A0A4W9A917_HUMAN;P01857|IGHG1_HUMAN;P01860|IGHG3_HUMAN;A0A286YEY4|A0A286YEY4_HUMAN;A0A0A0MS08|A0A0A0MS08_HUMAN;A0A0A0MS07|A0A0A0MS07_HUMAN;A0A286YES1|A0A286YES1_HUMAN	Carbamidomethylation	C7:Carbamidomethylation:1000.00	FALSE
NSLYLQMNSLR	63.2	1337.68	11	-0.8	669.845	2	20.8028	1010000	14900000	4639	20210614_HS_50ng_RAW-5.raw	15				FALSE
NTEILTGSWSDQTYPEGTQAIYK	58.79	2601.22	23	4.7	868.086	3	23.1446	1910000	17700000	5310	20210614_HS_50ng_RAW-3.raw	14	A0A0D9SG88|A0A0D9SG88_HUMAN;P08603|CFAH_HUMAN;Q5TFM2|Q5TFM2_HUMAN			FALSE
NTLELSN(+0.98)GVIVK	55.29	1286.71	12	3.2	644.363	2	19.6622	2280000	27700000	4274	20210614_HS_50ng_RAW-5.raw	16	P04114|APOB_HUMAN	Deamidation (NQ)	N7:Deamidation (NQ):81.36	FALSE
NTLELSNGVIVK	51.84	1285.72	12	0.8	643.87	2	19.3816	356000	5070000	4128	20210614_HS_50ng_RAW-6.raw	9	P04114|APOB_HUMAN			FALSE
NTLIIYLDK	33.75	1091.62	9	3.1	546.82	2	21.4029	2630000	12700000	4877	20210614_HS_50ng_RAW-9.raw	2	P01024|CO3_HUMAN;M0QYC8|M0QYC8_HUMAN			FALSE
NTLYLQMNSLR	52.31	1351.69	11	2.4	676.855	2	20.9467	1550000	17100000	4833	20210614_HS_50ng_RAW-13.raw	15				FALSE
NVPLPVIAELPPK	65.83	1385.83	13	1.4	693.922	2	24.612	22900000	92700000	6248	20210614_HS_50ng_RAW-1.raw	29	P01871|IGHM_HUMAN			FALSE
NVVFVIDK	48.76	932.533	8	3	467.275	2	18.7038	924000	11900000	3899	20210614_HS_50ng_RAW-6.raw	15	Q14624|ITIH4_HUMAN;B7ZKJ8|B7ZKJ8_HUMAN;H7C0L5|H7C0L5_HUMAN			FALSE
NWGLSFYADKPETTK	69.53	1755.85	15	0	586.29	3	21.8352	2270000	19800000	4982	20210614_HS_50ng_RAW-4.raw	15	P19652|A1AG2_HUMAN			FALSE
NWGLSVYADKPETTK	57.03	1707.85	15	1.1	854.932	2	19.7253	7650000	71800000	4306	20210614_HS_50ng_RAW-5.raw	22	P02763|A1AG1_HUMAN			FALSE
NYLAWYQQKPGQPPK	46.86	1816.93	15	-1.3	606.649	3	19.796	606000	5000000	4257	20210614_HS_50ng_RAW-6.raw	7	P06312|KV401_HUMAN			FALSE
NYNLVESLK	61.1	1078.57	9	2.6	540.292	2	18.6551	2160000	16000000	3940	20210614_HS_50ng_RAW-5.raw	16	P05546|HEP2_HUMAN			FALSE
Q(+0.98)KPDGVFQEDAPVIHQEMIGGLR	35.63	2564.27	23	6.5	855.769	3	22.9194	555000	4620000	5239	20210614_HS_50ng_RAW-15.raw	7	P01024|CO3_HUMAN	Deamidation (NQ)	Q1:Deamidation (NQ):0.00	FALSE
Q(+0.98)NC(+57.02)ELFEQLGEYK	64.41	1657.73	13	5.6	829.877	2	22.3178	1580000	15100000	5155	20210614_HS_50ng_RAW-4.raw	1	A0A0C4DGB6|A0A0C4DGB6_HUMAN;A0A087WWT3|A0A087WWT3_HUMAN;P02768|ALBU_HUMAN;C9JKR2|C9JKR2_HUMAN;D6RHD5|D6RHD5_HUMAN;B7WNR0|B7WNR0_HUMAN;H0YA55|H0YA55_HUMAN	Deamidation (NQ); Carbamidomethylation	Q1:Deamidation (NQ):0.00;C3:Carbamidomethylation:1000.00	FALSE
Q(-17.03)AVDTAVDGVFIR	65.48	1372.7	13	1.3	687.357	2	22.6474	1960000	22500000	5167	20210614_HS_50ng_RAW-3.raw	18	P19827|ITIH1_HUMAN;F8WAS2|F8WAS2_HUMAN	Pyro-glu from Q		FALSE
Q(-17.03)DPPSVVVTSHQAPGEK	71.66	1757.86	17	0.1	879.937	2	16.2548	1340000	14300000	3185	20210614_HS_50ng_RAW-6.raw	16	P25311|ZA2G_HUMAN	Pyro-glu from Q		FALSE
Q(-17.03)E(+21.98)PSQGTTTFAVTSILR	54.6	1839.9	17	-1.6	920.955	2	24.4358	1270000	9040000	6119	20210614_HS_50ng_RAW-1.raw	10	P01876|IGHA1_HUMAN;A0A286YEY1|A0A286YEY1_HUMAN	Pyro-glu from Q; Sodium adduct	Q1:Pyro-glu from Q:1000.00;E2:Sodium adduct:72.97	FALSE
Q(-17.03)EDDLANINQWVK	54.4	1554.73	13	3.9	778.376	2	23.7898	26200	616000	5615	20210614_HS_50ng_RAW-9.raw	3		Pyro-glu from Q		FALSE
Q(-17.03)EPERN(+0.98)EC(+57.02)FLQHK	59.57	1697.75	13	4.1	566.925	3	12.6277	13000000	40500000	2674	20210614_HS_50ng_RAW-1.raw	21	A0A0C4DGB6|A0A0C4DGB6_HUMAN;A0A087WWT3|A0A087WWT3_HUMAN;P02768|ALBU_HUMAN;H7C013|H7C013_HUMAN	Pyro-glu from Q; Deamidation (NQ); Carbamidomethylation	Q1:Pyro-glu from Q:1000.00;N6:Deamidation (NQ):98.37;C8:Carbamidomethylation:1000.00	FALSE
Q(-17.03)EPERNEC(+57.02)FLQ(+0.98)HKDDNPNLPR	70.23	2619.18	21	8.7	874.074	3	17.9007	148000	860000	3694	20210614_HS_50ng_RAW-15.raw	4	A0A0C4DGB6|A0A0C4DGB6_HUMAN;A0A087WWT3|A0A087WWT3_HUMAN;P02768|ALBU_HUMAN;H7C013|H7C013_HUMAN	Pyro-glu from Q; Carbamidomethylation; Deamidation (NQ)	Q1:Pyro-glu from Q:1000.00;C8:Carbamidomethylation:1000.00;Q11:Deamidation (NQ):0.00	FALSE
Q(-17.03)EPERNEC(+57.02)FLQHK	69.95	1696.76	13	-2.9	566.593	3	7.7703	170000000	1030000000	1734	20210614_HS_50ng_RAW-1.raw	93	A0A0C4DGB6|A0A0C4DGB6_HUMAN;A0A087WWT3|A0A087WWT3_HUMAN;P02768|ALBU_HUMAN;H7C013|H7C013_HUMAN	Pyro-glu from Q; Carbamidomethylation	C8:Carbamidomethylation:1000.00	FALSE
Q(-17.03)EPERNEC(+57.02)FLQHKDDN(+0.98)PNLPR	43.52	2619.18	21	5.9	655.805	4	18.4718	109000	649000	3914	20210614_HS_50ng_RAW-14.raw	1	A0A0C4DGB6|A0A0C4DGB6_HUMAN;A0A087WWT3|A0A087WWT3_HUMAN;P02768|ALBU_HUMAN;H7C013|H7C013_HUMAN	Pyro-glu from Q; Carbamidomethylation; Deamidation (NQ)	Q1:Pyro-glu from Q:1000.00;C8:Carbamidomethylation:1000.00;N16:Deamidation (NQ):0.00	FALSE
Q(-17.03)EPERNEC(+57.02)FLQHKDDNPNLPR	115.66	2618.19	21	-6.8	655.551	4	17.7427	48500000	470000000	3633	20210614_HS_50ng_RAW-3.raw	59	A0A0C4DGB6|A0A0C4DGB6_HUMAN;A0A087WWT3|A0A087WWT3_HUMAN;P02768|ALBU_HUMAN;H7C013|H7C013_HUMAN	Pyro-glu from Q; Carbamidomethylation	C8:Carbamidomethylation:1000.00	FALSE
Q(-17.03)EPSQGTTTFAVTSILR	85.48	1817.92	17	0.6	909.966	2	24.4358	12400000	94000000	6107	20210614_HS_50ng_RAW-1.raw	15	P01876|IGHA1_HUMAN;A0A286YEY1|A0A286YEY1_HUMAN	Pyro-glu from Q		FALSE
Q(-17.03)EPSQGTTTYAVTSILR	40.16	1833.91	17	-1.4	917.961	2	24.375	403000	886000	5767	20210614_HS_50ng_RAW-8.raw	2		Pyro-glu from Q		FALSE
Q(-17.03)EYEQLIAK	60.05	1103.55	9	2	552.783	2	18.4581	815000	7240000	3833	20210614_HS_50ng_RAW-6.raw	14	K7EQQ3|K7EQQ3_HUMAN;P35527|K1C9_HUMAN	Pyro-glu from Q		FALSE
Q(-17.03)FSFPLSSEPFQGSYK	63.43	1830.85	16	3.8	916.434	2	26.9717	3490000	24600000	6250	20210614_HS_50ng_RAW-14.raw	15	P01023|A2MG_HUMAN	Pyro-glu from Q		FALSE
Q(-17.03)GHN(+0.98)SVFLIK	48.58	1125.58	10	2.2	563.799	2	19.4661	1160000	12200000	4208	20210614_HS_50ng_RAW-4.raw	11	P02790|HEMO_HUMAN;Q9BS19|Q9BS19_HUMAN	Pyro-glu from Q; Deamidation (NQ)		FALSE
Q(-17.03)GHNSVFLIK	62.87	1124.6	10	0.9	563.307	2	19.0476	15300000	75900000	3996	20210614_HS_50ng_RAW-6.raw	15	P02790|HEMO_HUMAN;Q9BS19|Q9BS19_HUMAN	Pyro-glu from Q		FALSE
Q(-17.03)GIPFFGQVR	57.41	1130.59	10	5.2	566.304	2	25.3211	4080000	25500000	5855	20210614_HS_50ng_RAW-3.raw	15	P01023|A2MG_HUMAN	Pyro-glu from Q		FALSE
Q(-17.03)GLLPVLESFK	58.11	1212.68	11	3.1	607.347	2	29.0539	4090000	27800000	6613	20210614_HS_50ng_RAW-6.raw	15	F8W696|F8W696_HUMAN;P02647|APOA1_HUMAN	Pyro-glu from Q		FALSE
Q(-17.03)INDYVEK	51.33	990.466	8	0.2	496.24	2	12.4214	5710000	10100000	2347	20210614_HS_50ng_RAW-3.raw	19		Pyro-glu from Q		FALSE
Q(-17.03)IQVSWLR	44.76	1011.55	8	2.1	506.783	2	24.1232	61200	607000	5600	20210614_HS_50ng_RAW-6.raw	3	P01871|IGHM_HUMAN	Pyro-glu from Q		FALSE
Q(-17.03)ISNLQQSISDAEQR	72.71	1698.82	15	3.3	850.419	2	20.8041	1720000	19300000	4585	20210614_HS_50ng_RAW-15.raw	15	#CONTAM#cont|000132|;#CONTAM#cont|000135|;#CONTAM#cont|000134|;P04264|K2C1_HUMAN	Pyro-glu from Q		FALSE
Q(-17.03)KPDGVFQEDAPVIHQEMIGGLR	65.32	2546.26	23	2	849.762	3	24.1311	4400000	47200000	5619	20210614_HS_50ng_RAW-8.raw	15	P01024|CO3_HUMAN	Pyro-glu from Q		FALSE
Q(-17.03)LN(+0.98)EINYEDHK	28.89	1385.61	11	5	693.816	2	16.3734	13800	353000	3385	20210614_HS_50ng_RAW-10.raw	1	E7ETN3|E7ETN3_HUMAN;P00751|CFAB_HUMAN;A0A0G2JH38|A0A0G2JH38_HUMAN;B4E1Z4|B4E1Z4_HUMAN	Pyro-glu from Q; Deamidation (NQ)	Q1:Pyro-glu from Q:1000.00;N3:Deamidation (NQ):0.00	FALSE
Q(-17.03)LNEINYEDHK	54.57	1384.63	11	-9.4	693.314	2	16.3261	1210000	11700000	3209	20210614_HS_50ng_RAW-3.raw	11	E7ETN3|E7ETN3_HUMAN;P00751|CFAB_HUMAN;A0A0G2JH38|A0A0G2JH38_HUMAN;B4E1Z4|B4E1Z4_HUMAN	Pyro-glu from Q		FALSE
Q(-17.03)N(+0.98)C(+57.02)ELFE(+21.98)QLGEYK	39.46	1662.68	13	7.7	832.356	2	23.5937	450000	1640000	6043	20210614_HS_50ng_RAW-1.raw	1	A0A0C4DGB6|A0A0C4DGB6_HUMAN;A0A087WWT3|A0A087WWT3_HUMAN;P02768|ALBU_HUMAN;C9JKR2|C9JKR2_HUMAN;D6RHD5|D6RHD5_HUMAN;B7WNR0|B7WNR0_HUMAN;H0YA55|H0YA55_HUMAN	Pyro-glu from Q; Deamidation (NQ); Carbamidomethylation; Sodium adduct	Q1:Pyro-glu from Q:1000.00;N2:Deamidation (NQ):25.03;C3:Carbamidomethylation:1000.00;E7:Sodium adduct:15.12	FALSE
Q(-17.03)NC(+57.02)E(+21.98)LFE(+21.98)QLGEYK	30.91	1683.68	13	-3.2	842.846	2	23.7173	31400	528000	5585	20210614_HS_50ng_RAW-9.raw	3	A0A0C4DGB6|A0A0C4DGB6_HUMAN;A0A087WWT3|A0A087WWT3_HUMAN;P02768|ALBU_HUMAN;C9JKR2|C9JKR2_HUMAN;D6RHD5|D6RHD5_HUMAN;B7WNR0|B7WNR0_HUMAN;H0YA55|H0YA55_HUMAN	Pyro-glu from Q; Carbamidomethylation; Sodium adduct; Sodium adduct	Q1:Pyro-glu from Q:1000.00;C3:Carbamidomethylation:1000.00;E4:Sodium adduct:11.94;E7:Sodium adduct:25.70	FALSE
Q(-17.03)NC(+57.02)E(+21.98)LFEQ(+0.98)LGEYK	27.65	1662.68	13	6.9	555.239	3	23.7242			5513	20210614_HS_50ng_RAW-8.raw	3	A0A0C4DGB6|A0A0C4DGB6_HUMAN;A0A087WWT3|A0A087WWT3_HUMAN;P02768|ALBU_HUMAN;C9JKR2|C9JKR2_HUMAN;D6RHD5|D6RHD5_HUMAN;B7WNR0|B7WNR0_HUMAN;H0YA55|H0YA55_HUMAN	Pyro-glu from Q; Carbamidomethylation; Sodium adduct; Deamidation (NQ)	Q1:Pyro-glu from Q:1000.00;C3:Carbamidomethylation:1000.00;E4:Sodium adduct:7.77;Q8:Deamidation (NQ):17.08	FALSE
Q(-17.03)NC(+57.02)E(+21.98)LFEQLGEYK	63	1661.7	13	4.6	831.859	2	24.1187	2810000	29500000	5281	20210614_HS_50ng_RAW-2.raw	14	A0A0C4DGB6|A0A0C4DGB6_HUMAN;A0A087WWT3|A0A087WWT3_HUMAN;P02768|ALBU_HUMAN;C9JKR2|C9JKR2_HUMAN;D6RHD5|D6RHD5_HUMAN;B7WNR0|B7WNR0_HUMAN;H0YA55|H0YA55_HUMAN	Pyro-glu from Q; Carbamidomethylation; Sodium adduct	Q1:Pyro-glu from Q:1000.00;C3:Carbamidomethylation:1000.00;E4:Sodium adduct:0.00	FALSE
Q(-17.03)NC(+57.02)ELFE(+21.98)Q(+0.98)LGEYK	44.81	1662.68	13	3.6	555.237	3	23.4776			5846	20210614_HS_50ng_RAW-1.raw	1	A0A0C4DGB6|A0A0C4DGB6_HUMAN;A0A087WWT3|A0A087WWT3_HUMAN;P02768|ALBU_HUMAN;C9JKR2|C9JKR2_HUMAN;D6RHD5|D6RHD5_HUMAN;B7WNR0|B7WNR0_HUMAN;H0YA55|H0YA55_HUMAN	Pyro-glu from Q; Carbamidomethylation; Sodium adduct; Deamidation (NQ)	Q1:Pyro-glu from Q:1000.00;C3:Carbamidomethylation:1000.00;E7:Sodium adduct:38.16;Q8:Deamidation (NQ):56.47	FALSE
Q(-17.03)NC(+57.02)ELFE(+21.98)QLGEYK	86.06	1661.7	13	2.6	831.86	2	23.4981	13800000	131000000	5838	20210614_HS_50ng_RAW-1.raw	19	A0A0C4DGB6|A0A0C4DGB6_HUMAN;A0A087WWT3|A0A087WWT3_HUMAN;P02768|ALBU_HUMAN;C9JKR2|C9JKR2_HUMAN;D6RHD5|D6RHD5_HUMAN;B7WNR0|B7WNR0_HUMAN;H0YA55|H0YA55_HUMAN	Pyro-glu from Q; Carbamidomethylation; Sodium adduct	Q1:Pyro-glu from Q:1000.00;C3:Carbamidomethylation:1000.00;E7:Sodium adduct:51.54	FALSE
Q(-17.03)NC(+57.02)ELFEQLGEYK	77.81	1639.72	13	-1.9	820.865	2	23.7424	119000000	1870000000	5451	20210614_HS_50ng_RAW-3.raw	73	A0A0C4DGB6|A0A0C4DGB6_HUMAN;A0A087WWT3|A0A087WWT3_HUMAN;P02768|ALBU_HUMAN;C9JKR2|C9JKR2_HUMAN;D6RHD5|D6RHD5_HUMAN;B7WNR0|B7WNR0_HUMAN;H0YA55|H0YA55_HUMAN	Pyro-glu from Q; Carbamidomethylation	C3:Carbamidomethylation:1000.00	FALSE
Q(-17.03)PSSAFAAFVK	74.46	1134.57	11	4.8	568.295	2	23.033	5840000	42400000	5273	20210614_HS_50ng_RAW-3.raw	15	P01024|CO3_HUMAN	Pyro-glu from Q		FALSE
Q(-17.03)PVPGQQMTLK	42	1208.62	11	2	605.32	2	17.5223	3660000	24700000	3585	20210614_HS_50ng_RAW-3.raw	12	P01024|CO3_HUMAN	Pyro-glu from Q		FALSE
Q(-17.03)QNAQGGFSSTQDTVVALHALSK	78.85	2369.16	23	2.8	790.73	3	22.3114	2360000	26700000	5058	20210614_HS_50ng_RAW-15.raw	16	P01023|A2MG_HUMAN	Pyro-glu from Q		FALSE
Q(-17.03)SEDSTFYLGER	64.54	1413.6	12	-0.6	707.809	2	18.5711	720000	6580000	3926	20210614_HS_50ng_RAW-5.raw	11	E9PFZ2|E9PFZ2_HUMAN;H7C5R1|H7C5R1_HUMAN;P00450|CERU_HUMAN	Pyro-glu from Q		FALSE
Q(-17.03)SLEASLAETEGR	51.73	1372.65	13	4	687.334	2	18.642	53400	739000	4087	20210614_HS_50ng_RAW-13.raw	3	#CONTAM#cont|000133|;#CONTAM#cont|000131|;P13645|K1C10_HUMAN;#CONTAM#cont|000129|;#CONTAM#cont|000136|;#CONTAM#cont|000122|;#CONTAM#cont|000130|	Pyro-glu from Q		FALSE
Q(-17.03)TALVE(+21.98)LVK	49.58	1004.55	9	-0.7	503.283	2	22.224	14100000	104000000	5012	20210614_HS_50ng_RAW-15.raw	16	A0A0C4DGB6|A0A0C4DGB6_HUMAN;A0A087WWT3|A0A087WWT3_HUMAN;P02768|ALBU_HUMAN;C9JKR2|C9JKR2_HUMAN;D6RHD5|D6RHD5_HUMAN;B7WNR0|B7WNR0_HUMAN;H0YA55|H0YA55_HUMAN	Pyro-glu from Q; Sodium adduct	Q1:Pyro-glu from Q:1000.00;E6:Sodium adduct:63.22	FALSE
Q(-17.03)TALVELLK	37.65	996.586	9	-0.6	499.3	2	22.4068	16300	153000	5515	20210614_HS_50ng_RAW-1.raw	1	#CONTAM#cont|000097|;#CONTAM#cont|000035|;#CONTAM#cont|000017|	Pyro-glu from Q		FALSE
Q(-17.03)TALVELVK	58.64	982.57	9	-4.8	492.29	2	22.1426	110000000	1180000000	5513	20210614_HS_50ng_RAW-1.raw	53	A0A0C4DGB6|A0A0C4DGB6_HUMAN;A0A087WWT3|A0A087WWT3_HUMAN;P02768|ALBU_HUMAN;C9JKR2|C9JKR2_HUMAN;D6RHD5|D6RHD5_HUMAN;B7WNR0|B7WNR0_HUMAN;H0YA55|H0YA55_HUMAN	Pyro-glu from Q		FALSE
Q(-17.03)THQPPAPNSLIR	40.76	1440.75	13	0	721.381	2	16.8736	176000	2170000	3476	20210614_HS_50ng_RAW-12.raw	5	P02747|C1QC_HUMAN	Pyro-glu from Q		FALSE
Q(-17.03)TQVSVLPEGGETPLFK	59.51	1811.93	17	5.4	906.977	2	24.1752	514000	6430000	6052	20210614_HS_50ng_RAW-1.raw	12	A0A0A0MS51|A0A0A0MS51_HUMAN;P06396|GELS_HUMAN;A0A0A0MT01|A0A0A0MT01_HUMAN	Pyro-glu from Q		FALSE
Q(-17.03)TVSWAVTPK	73.8	1098.57	10	1.3	550.293	2	19.069	3190000	30700000	4368	20210614_HS_50ng_RAW-1.raw	15	P01023|A2MG_HUMAN	Pyro-glu from Q		FALSE
Q(-17.03)VGSGVTTDQVQAEAK	75.26	1599.77	16	0.2	800.894	2	14.9501	4420000	18700000	2843	20210614_HS_50ng_RAW-6.raw	15	P01871|IGHM_HUMAN	Pyro-glu from Q		FALSE
Q(-17.03)VVAGLNFR	65.06	985.534	9	1.6	493.775	2	21.3633	1230000	11300000	4756	20210614_HS_50ng_RAW-15.raw	15	P01042|KNG1_HUMAN	Pyro-glu from Q		FALSE
Q(-17.03)YYEGSEIVVAGR	72.67	1452.69	13	-1.3	727.351	2	19.3308	405000	6640000	4482	20210614_HS_50ng_RAW-1.raw	13	P19827|ITIH1_HUMAN	Pyro-glu from Q		FALSE
QAVDTAVDGVFIR	64.89	1389.73	13	2.5	695.872	2	20.6405	1280000	13900000	4589	20210614_HS_50ng_RAW-5.raw	12	P19827|ITIH1_HUMAN;F8WAS2|F8WAS2_HUMAN			FALSE
QDPPSVVVTSHQAPGEK	42.12	1774.88	17	-0.4	592.635	3	12.9862	258000	1610000	2503	20210614_HS_50ng_RAW-7.raw	2	P25311|ZA2G_HUMAN			FALSE
QEDDLANINQWVK	52.09	1571.76	13	-0.5	786.886	2	22.126	506000	8280000	5161	20210614_HS_50ng_RAW-12.raw	13				FALSE
QEPERNEC(+57.02)FLQ(+0.98)HKDDNPNLPR	41.9	2636.2	21	8.4	879.749	3	16.5997			3374	20210614_HS_50ng_RAW-7.raw	1	A0A0C4DGB6|A0A0C4DGB6_HUMAN;A0A087WWT3|A0A087WWT3_HUMAN;P02768|ALBU_HUMAN;H7C013|H7C013_HUMAN	Carbamidomethylation; Deamidation (NQ)	C8:Carbamidomethylation:1000.00;Q11:Deamidation (NQ):4.78	FALSE
QEPERNEC(+57.02)FLQHK	41.48	1713.79	13	-4.4	429.453	4	6.12	59100000	175000000	1229	20210614_HS_50ng_RAW-1.raw	45	A0A0C4DGB6|A0A0C4DGB6_HUMAN;A0A087WWT3|A0A087WWT3_HUMAN;P02768|ALBU_HUMAN;H7C013|H7C013_HUMAN	Carbamidomethylation	C8:Carbamidomethylation:1000.00	FALSE
QEPERNEC(+57.02)FLQHKDDNPNLPR	60.54	2635.22	21	0.8	879.415	3	16.4995	38700000	278000000	3316	20210614_HS_50ng_RAW-14.raw	44	A0A0C4DGB6|A0A0C4DGB6_HUMAN;A0A087WWT3|A0A087WWT3_HUMAN;P02768|ALBU_HUMAN;H7C013|H7C013_HUMAN	Carbamidomethylation	C8:Carbamidomethylation:1000.00	FALSE
QEPSQGTTTFAVTSILR	75.5	1834.94	17	0.5	918.479	2	24.6538	33300000	271000000	5810	20210614_HS_50ng_RAW-4.raw	47	P01876|IGHA1_HUMAN;A0A286YEY1|A0A286YEY1_HUMAN			FALSE
QEPSQGTTTYAVTSILR	49.73	1850.94	17	1.3	926.477	2	21.464	307000	3760000	4801	20210614_HS_50ng_RAW-6.raw	7				FALSE
QEYEQLIAK	37.5	1120.58	9	0.6	561.296	2	14.2317	403000	1600000	2812	20210614_HS_50ng_RAW-10.raw	4	K7EQQ3|K7EQQ3_HUMAN;P35527|K1C9_HUMAN			FALSE
QFPILLDFK	51.94	1119.63	9	5.6	560.827	2	27.1258	1500000	11400000	6252	20210614_HS_50ng_RAW-3.raw	14	P05546|HEP2_HUMAN			FALSE
QFSFPLSSEPFQGSYK	63.09	1847.87	16	0.9	924.945	2	24.8473	13700000	101000000	6211	20210614_HS_50ng_RAW-1.raw	30	P01023|A2MG_HUMAN			FALSE
QGIPFFGQVR	57.85	1147.61	10	2.4	574.816	2	23.1253	9610000	46100000	5309	20210614_HS_50ng_RAW-3.raw	13	P01023|A2MG_HUMAN			FALSE
QGLLPVLESFK	66.05	1229.7	11	-2	615.857	2	25.966	21500000	163000000	5963	20210614_HS_50ng_RAW-15.raw	18	F8W696|F8W696_HUMAN;P02647|APOA1_HUMAN			FALSE
QGPVNLLSDPEQGVEVTGQYER	53.51	2414.17	22	2.2	805.733	3	22.6136	1030000	13100000	5163	20210614_HS_50ng_RAW-6.raw	13	Q14624|ITIH4_HUMAN;B7ZKJ8|B7ZKJ8_HUMAN			FALSE
QGVDADINGLR	37.47	1156.58	11	-3.1	579.297	2	15.103	24400	228000	3075	20210614_HS_50ng_RAW-13.raw	1	K7EQQ3|K7EQQ3_HUMAN;P35527|K1C9_HUMAN			FALSE
QGYFVEAQPK	36.09	1165.58	10	1.6	583.797	2	13.5921	58400	280000	2634	20210614_HS_50ng_RAW-7.raw	2	P02743|SAMP_HUMAN			FALSE
QINDYVEK	37.16	1007.49	8	-3	504.752	2	5.9623	10000000	24900000	1007	20210614_HS_50ng_RAW-9.raw	32				FALSE
QIQVSWLR	40.88	1028.58	8	0.8	515.296	2	21.1496	4950000	46300000	4689	20210614_HS_50ng_RAW-3.raw	15	P01871|IGHM_HUMAN			FALSE
QISNLQQSISDAEQR	72.38	1715.84	15	3	858.932	2	17.7883	2870000	30300000	3679	20210614_HS_50ng_RAW-5.raw	15	#CONTAM#cont|000132|;#CONTAM#cont|000135|;#CONTAM#cont|000134|;P04264|K2C1_HUMAN			FALSE
QKPDGVFQ(+0.98)EDAPVIHQEMIGGLR	50.65	2564.27	23	9.1	855.771	3	23.0339	62500	595000	5367	20210614_HS_50ng_RAW-4.raw	1	P01024|CO3_HUMAN	Deamidation (NQ)	Q8:Deamidation (NQ):20.76	FALSE
QKPDGVFQEDAPVIHQEMIGGLR	60.75	2563.29	23	-6.2	641.825	4	23.0455	3800000	33200000	5315	20210614_HS_50ng_RAW-8.raw	24	P01024|CO3_HUMAN			FALSE
QN(+0.98)C(+57.02)ELFEQLGEYK	48.31	1657.73	13	7.5	829.878	2	22.298	2680000	18900000	5218	20210614_HS_50ng_RAW-9.raw	1	A0A0C4DGB6|A0A0C4DGB6_HUMAN;A0A087WWT3|A0A087WWT3_HUMAN;P02768|ALBU_HUMAN;C9JKR2|C9JKR2_HUMAN;D6RHD5|D6RHD5_HUMAN;B7WNR0|B7WNR0_HUMAN;H0YA55|H0YA55_HUMAN	Deamidation (NQ); Carbamidomethylation	N2:Deamidation (NQ):0.00;C3:Carbamidomethylation:1000.00	FALSE
QNC(+57.02)ELFE(+21.98)Q(+0.98)LGEYK	38.66	1679.71	13	2	420.936	4	21.7762			5298	20210614_HS_50ng_RAW-1.raw	1	A0A0C4DGB6|A0A0C4DGB6_HUMAN;A0A087WWT3|A0A087WWT3_HUMAN;P02768|ALBU_HUMAN;C9JKR2|C9JKR2_HUMAN;D6RHD5|D6RHD5_HUMAN;B7WNR0|B7WNR0_HUMAN;H0YA55|H0YA55_HUMAN	Carbamidomethylation; Sodium adduct; Deamidation (NQ)	C3:Carbamidomethylation:1000.00;E7:Sodium adduct:6.63;Q8:Deamidation (NQ):13.18	FALSE
QNC(+57.02)ELFE(+21.98)QLGEYK	43.29	1678.73	13	-0.3	840.371	2	21.7691	674000	7700000	5293	20210614_HS_50ng_RAW-1.raw	6	A0A0C4DGB6|A0A0C4DGB6_HUMAN;A0A087WWT3|A0A087WWT3_HUMAN;P02768|ALBU_HUMAN;C9JKR2|C9JKR2_HUMAN;D6RHD5|D6RHD5_HUMAN;B7WNR0|B7WNR0_HUMAN;H0YA55|H0YA55_HUMAN	Carbamidomethylation; Sodium adduct	C3:Carbamidomethylation:1000.00;E7:Sodium adduct:9.15	FALSE
QNC(+57.02)ELFEQLGEYK	73.3	1656.75	13	-0.4	553.255	3	21.7468	188000000	1540000000	5274	20210614_HS_50ng_RAW-1.raw	155	A0A0C4DGB6|A0A0C4DGB6_HUMAN;A0A087WWT3|A0A087WWT3_HUMAN;P02768|ALBU_HUMAN;C9JKR2|C9JKR2_HUMAN;D6RHD5|D6RHD5_HUMAN;B7WNR0|B7WNR0_HUMAN;H0YA55|H0YA55_HUMAN	Carbamidomethylation	C3:Carbamidomethylation:1000.00	FALSE
QPSSAFAAFVK	47.31	1151.6	11	4.6	576.807	2	20.6083	2590000	25200000	4424	20210614_HS_50ng_RAW-2.raw	5	P01024|CO3_HUMAN			FALSE
QPVPGQQMTLK	38.5	1225.65	11	1.3	613.832	2	13.09	1040000	2790000	2514	20210614_HS_50ng_RAW-15.raw	8	P01024|CO3_HUMAN			FALSE
QQ(+0.98)NAQGGFSSTQDTVVALHALSK	36.81	2387.17	23	3.3	796.734	3	21.6178	38400	931000	4941	20210614_HS_50ng_RAW-9.raw	1	P01023|A2MG_HUMAN	Deamidation (NQ)	Q2:Deamidation (NQ):0.00	FALSE
QQN(+0.98)AQGGFSSTQDTVVALHALSK	25.89	2387.17	23	1.4	796.732	3	21.645	44600	664000	4859	20210614_HS_50ng_RAW-3.raw	1	P01023|A2MG_HUMAN	Deamidation (NQ)	N3:Deamidation (NQ):0.00	FALSE
QQNAQ(+0.98)GGFSSTQDTVVALHALSK	45.05	2387.17	23	5.1	796.735	3	21.6244	85300	1060000	4931	20210614_HS_50ng_RAW-4.raw	1	P01023|A2MG_HUMAN	Deamidation (NQ)	Q5:Deamidation (NQ):0.00	FALSE
QQNAQGGFSSTQ(+0.98)DTVVALHALSK	41.28	2387.17	23	7.6	796.737	3	21.5837	73600	915000	5051	20210614_HS_50ng_RAW-13.raw	1	P01023|A2MG_HUMAN	Deamidation (NQ)	Q12:Deamidation (NQ):0.00	FALSE
QQNAQGGFSSTQDTVVALHALSK	76.97	2386.19	23	4.3	796.404	3	21.7569	10800000	100000000	4698	20210614_HS_50ng_RAW-2.raw	15	P01023|A2MG_HUMAN			FALSE
QSEDSTFYLGER	57.28	1430.63	12	-2.5	716.321	2	16.7989	1420000	12300000	3348	20210614_HS_50ng_RAW-6.raw	20	E9PFZ2|E9PFZ2_HUMAN;H7C5R1|H7C5R1_HUMAN;P00450|CERU_HUMAN			FALSE
QSFDLSVK	39.46	922.476	8	-1.5	462.245	2	15.5292	47400	282000	3090	20210614_HS_50ng_RAW-11.raw	1	P04114|APOB_HUMAN			FALSE
QSLEASLAETEGR	38.11	1389.67	13	0.7	695.842	2	16.8083	161000	1700000	3369	20210614_HS_50ng_RAW-2.raw	4	#CONTAM#cont|000133|;#CONTAM#cont|000131|;P13645|K1C10_HUMAN;#CONTAM#cont|000129|;#CONTAM#cont|000136|;#CONTAM#cont|000122|;#CONTAM#cont|000130|			FALSE
QSVEADINGLR	56.53	1200.61	11	0.1	601.312	2	16.63	419000	3950000	3314	20210614_HS_50ng_RAW-8.raw	11	#CONTAM#cont|000133|;#CONTAM#cont|000131|;P13645|K1C10_HUMAN;#CONTAM#cont|000129|;#CONTAM#cont|000136|;#CONTAM#cont|000122|;#CONTAM#cont|000130|			FALSE
QTALVE(+21.98)LVK	44.35	1021.58	9	-3.1	511.795	2	18.4179	5000000	27000000	4153	20210614_HS_50ng_RAW-1.raw	14	A0A0C4DGB6|A0A0C4DGB6_HUMAN;A0A087WWT3|A0A087WWT3_HUMAN;P02768|ALBU_HUMAN;C9JKR2|C9JKR2_HUMAN;D6RHD5|D6RHD5_HUMAN;B7WNR0|B7WNR0_HUMAN;H0YA55|H0YA55_HUMAN	Sodium adduct	E6:Sodium adduct:42.60	FALSE
QTALVELVK	51.62	999.596	9	1.9	500.806	2	20.0371	183000000	1350000000	4360	20210614_HS_50ng_RAW-8.raw	152	A0A0C4DGB6|A0A0C4DGB6_HUMAN;A0A087WWT3|A0A087WWT3_HUMAN;P02768|ALBU_HUMAN;C9JKR2|C9JKR2_HUMAN;D6RHD5|D6RHD5_HUMAN;B7WNR0|B7WNR0_HUMAN;H0YA55|H0YA55_HUMAN			FALSE
QTQVSVLPEGGETPLFK	62.79	1828.96	17	1.9	915.487	2	23.0936	1720000	18700000	5301	20210614_HS_50ng_RAW-6.raw	16	A0A0A0MS51|A0A0A0MS51_HUMAN;P06396|GELS_HUMAN;A0A0A0MT01|A0A0A0MT01_HUMAN			FALSE
QTVSWAVTPK	60.53	1115.6	10	0.7	558.806	2	16.8018	15000000	88500000	3346	20210614_HS_50ng_RAW-3.raw	19	P01023|A2MG_HUMAN			FALSE
QVGSGVTTDQVQAEAK	50.3	1616.8	16	-4	809.404	2	7.4268	2220000	5750000	1438	20210614_HS_50ng_RAW-6.raw	3	P01871|IGHM_HUMAN			FALSE
QVVAGLNFR	55.97	1002.56	9	1.4	502.288	2	18.531	3260000	24500000	3854	20210614_HS_50ng_RAW-3.raw	15	P01042|KNG1_HUMAN			FALSE
QYYEGSEIVVAGR	45.29	1469.72	13	-0.7	735.864	2	17.3595	105000	1150000	3565	20210614_HS_50ng_RAW-3.raw	2	P19827|ITIH1_HUMAN			FALSE
RHPDYSVVLLLR	81.11	1466.84	12	-1.5	489.952	3	23.0892	84400000	1050000000	5549	20210614_HS_50ng_RAW-4.raw	127	A0A0C4DGB6|A0A0C4DGB6_HUMAN;P02768|ALBU_HUMAN;C9JKR2|C9JKR2_HUMAN;D6RHD5|D6RHD5_HUMAN;B7WNR0|B7WNR0_HUMAN;H0YA55|H0YA55_HUMAN			FALSE
RHPYFYAPELLFFAK	68.27	1897.99	15	-0.2	633.67	3	28.8006	561000	519000	7013	20210614_HS_50ng_RAW-1.raw	1	A0A0C4DGB6|A0A0C4DGB6_HUMAN;P02768|ALBU_HUMAN;H7C013|H7C013_HUMAN;D6RHD5|D6RHD5_HUMAN;B7WNR0|B7WNR0_HUMAN;H0YA55|H0YA55_HUMAN			FALSE
RIPIEDGSGEVVLSR	83.05	1625.87	15	1	542.966	3	18.8576	3610000	37200000	4020	20210614_HS_50ng_RAW-5.raw	24	P01024|CO3_HUMAN			FALSE
RPC(+57.02)FSALE(+21.98)VDETYVPK	59.09	1931.91	16	1.2	644.977	3	21.8018	953000	6370000	4881	20210614_HS_50ng_RAW-6.raw	5	A0A0C4DGB6|A0A0C4DGB6_HUMAN;A0A087WWT3|A0A087WWT3_HUMAN;P02768|ALBU_HUMAN;C9JKR2|C9JKR2_HUMAN;D6RHD5|D6RHD5_HUMAN;B7WNR0|B7WNR0_HUMAN;H0YA55|H0YA55_HUMAN	Carbamidomethylation; Sodium adduct	C3:Carbamidomethylation:1000.00;E8:Sodium adduct:12.19	FALSE
RPC(+57.02)FSALEVD(+21.98)ETYVPK	61.96	1931.91	16	3.2	644.978	3	21.6884	5170000	31400000	4838	20210614_HS_50ng_RAW-15.raw	10	A0A0C4DGB6|A0A0C4DGB6_HUMAN;A0A087WWT3|A0A087WWT3_HUMAN;P02768|ALBU_HUMAN;C9JKR2|C9JKR2_HUMAN;D6RHD5|D6RHD5_HUMAN;B7WNR0|B7WNR0_HUMAN;H0YA55|H0YA55_HUMAN	Carbamidomethylation; Sodium adduct	C3:Carbamidomethylation:1000.00;D10:Sodium adduct:0.00	FALSE
RPC(+57.02)FSALEVDE(+21.98)TYVPK	58.32	1931.91	16	2.9	644.978	3	21.7378	1250000	6940000	4913	20210614_HS_50ng_RAW-14.raw	3	A0A0C4DGB6|A0A0C4DGB6_HUMAN;A0A087WWT3|A0A087WWT3_HUMAN;P02768|ALBU_HUMAN;C9JKR2|C9JKR2_HUMAN;D6RHD5|D6RHD5_HUMAN;B7WNR0|B7WNR0_HUMAN;H0YA55|H0YA55_HUMAN	Carbamidomethylation; Sodium adduct	C3:Carbamidomethylation:1000.00;E11:Sodium adduct:0.00	FALSE
RPC(+57.02)FSALEVDETYVPK	78.22	1909.92	16	-7.6	637.644	3	21.7128	455000000	4820000000	4926	20210614_HS_50ng_RAW-5.raw	245	A0A0C4DGB6|A0A0C4DGB6_HUMAN;A0A087WWT3|A0A087WWT3_HUMAN;P02768|ALBU_HUMAN;C9JKR2|C9JKR2_HUMAN;D6RHD5|D6RHD5_HUMAN;B7WNR0|B7WNR0_HUMAN;H0YA55|H0YA55_HUMAN	Carbamidomethylation	C3:Carbamidomethylation:1000.00	FALSE
RPC(+57.02)FSALTPD(+21.98)ETYVPK	44.3	1901.9	16	-6.9	634.968	3	22.0073	64500	707000	5100	20210614_HS_50ng_RAW-7.raw	2	#CONTAM#cont|000097|;#CONTAM#cont|000035|;#CONTAM#cont|000017|	Carbamidomethylation; Sodium adduct	C3:Carbamidomethylation:1000.00;D10:Sodium adduct:14.02	FALSE
RPYFPVAVGK	38.08	1132.64	10	2.2	567.328	2	18.1871	1510000	9670000	3755	20210614_HS_50ng_RAW-6.raw	12	A0A0D9SG88|A0A0D9SG88_HUMAN;P08603|CFAH_HUMAN;Q5TFM2|Q5TFM2_HUMAN			FALSE
RTHLPEVFLSK	61.3	1325.75	11	-0.5	442.922	3	19.1567	871000	7240000	4045	20210614_HS_50ng_RAW-6.raw	11	P02774|VTDB_HUMAN;D6RF35|D6RF35_HUMAN			FALSE
RTVAAPSVFIFPPSDEQLK	55.43	2101.12	19	-3	701.379	3	25.1612	3030000	12700000	5867	20210614_HS_50ng_RAW-8.raw	15	P01834|IGKC_HUMAN			FALSE
RVDTVDPPYPR	33.41	1313.67	11	-1.8	438.897	3	12.6928	190000	526000	2494	20210614_HS_50ng_RAW-12.raw	4	P04004|VTNC_HUMAN			FALSE
SASDLTWD(+21.98)NLK	29.87	1270.58	11	-2.1	636.296	2	18.9793	54400	690000	4192	20210614_HS_50ng_RAW-10.raw	2	H7C5E8|H7C5E8_HUMAN;P02787|TRFE_HUMAN	Sodium adduct	D8:Sodium adduct:6.65	FALSE
SASDLTWDNLK	69.39	1248.6	11	-5.3	625.303	2	19.0345	66400000	461000000	4073	20210614_HS_50ng_RAW-4.raw	38	H7C5E8|H7C5E8_HUMAN;P02787|TRFE_HUMAN			FALSE
SASLHLPK	44.59	851.486	8	-1.6	426.75	2	7.7705	3750000	6800000	1510	20210614_HS_50ng_RAW-15.raw	8				FALSE
SASNM(+15.99)AIVDVK	51.32	1149.57	11	0.2	575.792	2	13.2268	7680000	5830000	2423	20210614_HS_50ng_RAW-13.raw	17	P01023|A2MG_HUMAN	Oxidation (M)		FALSE
SASNMAIVDVK	48.89	1133.58	11	1.1	567.795	2	16.3623	169000	981000	3215	20210614_HS_50ng_RAW-6.raw	11	P01023|A2MG_HUMAN			FALSE
SAVTALWGK	39.81	931.513	9	0.2	466.764	2	18.2743			3857	20210614_HS_50ng_RAW-4.raw	2	F8W6P5|F8W6P5_HUMAN;P68871|HBB_HUMAN;A0A2R8Y7R2|A0A2R8Y7R2_HUMAN			FALSE
SC(+57.02)AVAEYGVYVK	80.55	1344.64	12	0.1	673.327	2	17.6759	64100000	606000000	3647	20210614_HS_50ng_RAW-5.raw	54	P00738|HPT_HUMAN;J3QLC9|J3QLC9_HUMAN;A0A087WU08|A0A087WU08_HUMAN;H0Y300|H0Y300_HUMAN;A0A0C4DGL8|A0A0C4DGL8_HUMAN;J3QR68|J3QR68_HUMAN	Carbamidomethylation	C2:Carbamidomethylation:1000.00	FALSE
SC(+57.02)DIPVFMNAR	53.21	1308.6	11	2.3	655.307	2	20.5323	767000	5430000	4643	20210614_HS_50ng_RAW-12.raw	7	P08603|CFAH_HUMAN	Carbamidomethylation	C2:Carbamidomethylation:1000.00	FALSE
SC(+57.02)DNPYIPN(+0.98)GDYSPLR	91.96	1867.8	16	2	934.912	2	20.6067	4080000	25400000	4534	20210614_HS_50ng_RAW-8.raw	15	A0A0D9SG88|A0A0D9SG88_HUMAN;P08603|CFAH_HUMAN;Q5TFM2|Q5TFM2_HUMAN	Carbamidomethylation; Deamidation (NQ)	C2:Carbamidomethylation:1000.00;N9:Deamidation (NQ):76.17	FALSE
SC(+57.02)DNPYIPNGDYSPLR	63.9	1866.82	16	1.8	934.419	2	20.5026	16200	349000	4519	20210614_HS_50ng_RAW-3.raw	1	A0A0D9SG88|A0A0D9SG88_HUMAN;P08603|CFAH_HUMAN;Q5TFM2|Q5TFM2_HUMAN	Carbamidomethylation	C2:Carbamidomethylation:1000.00	FALSE
SC(+57.02)DTPPPC(+57.02)PR	44.95	1185.49	10	-0.1	593.753	2	4.5266	122000	1180000	787	20210614_HS_50ng_RAW-1.raw	6	A0A4W9A917|A0A4W9A917_HUMAN;P01860|IGHG3_HUMAN;A0A286YES1|A0A286YES1_HUMAN	Carbamidomethylation; Carbamidomethylation	C2:Carbamidomethylation:1000.00;C8:Carbamidomethylation:1000.00	FALSE
SC(+57.02)ESNSPFPVHPGTAEC(+57.02)C(+57.02)TK	88.05	2263.93	20	-2.7	755.648	3	16.6445	6270000	53100000	3326	20210614_HS_50ng_RAW-5.raw	15	D6RBJ7|D6RBJ7_HUMAN;P02774|VTDB_HUMAN;D6RF20|D6RF20_HUMAN;D6RF35|D6RF35_HUMAN	Carbamidomethylation; Carbamidomethylation; Carbamidomethylation	C2:Carbamidomethylation:1000.00;C17:Carbamidomethylation:1000.00;C18:Carbamidomethylation:1000.00	FALSE
SC(+57.02)VGETTESTQC(+57.02)EDEELEHLR	59.29	2508.04	21	3	837.023	3	17.999	265000	4330000	3758	20210614_HS_50ng_RAW-9.raw	9	P10643|CO7_HUMAN	Carbamidomethylation; Carbamidomethylation	C2:Carbamidomethylation:1000.00;C12:Carbamidomethylation:1000.00	FALSE
SDVGFLPPFPTLDPEEK	42.46	1886.93	17	2.3	944.475	2	27.6925	559000	4340000	6495	20210614_HS_50ng_RAW-9.raw	7	P43652|AFAM_HUMAN			FALSE
SDVM(+15.99)YTDWK	32.68	1159.49	9	1.8	580.751	2	15.3692	554000	1650000	3000	20210614_HS_50ng_RAW-14.raw	6	P19652|A1AG2_HUMAN	Oxidation (M)		FALSE
SDVMYTDWK	57.45	1143.49	9	0.6	572.753	2	17.0277	639000	5920000	3423	20210614_HS_50ng_RAW-15.raw	12	P19652|A1AG2_HUMAN			FALSE
SDVVYTDWK	56.21	1111.52	9	1.3	556.767	2	16.4271	17000000	59200000	3208	20210614_HS_50ng_RAW-3.raw	23	P02763|A1AG1_HUMAN			FALSE
SEGSSVNLSPPLEQC(+57.02)VPDR	57.62	2069.97	19	4.1	691	3	20.0172	2540000	24300000	4339	20210614_HS_50ng_RAW-8.raw	26	C9JV37|C9JV37_HUMAN;P00734|THRB_HUMAN;E9PIT3|E9PIT3_HUMAN	Carbamidomethylation	C15:Carbamidomethylation:1000.00	FALSE
SEILAHWSPAK	45.99	1237.65	11	2.9	619.832	2	17.7721	37700	522000	3689	20210614_HS_50ng_RAW-14.raw	2	P04114|APOB_HUMAN			FALSE
SELEEQLTPVAEETR	68.35	1729.84	15	0.9	865.927	2	18.4581	1390000	15800000	3857	20210614_HS_50ng_RAW-8.raw	15	E7ERP7|E7ERP7_HUMAN;E9PEV4|E9PEV4_HUMAN;P02649|APOE_HUMAN;H0Y7L5|H0Y7L5_HUMAN			FALSE
SEYQADYESLR	54.95	1359.59	11	-0.8	680.804	2	14.3519	2320000	9840000	2732	20210614_HS_50ng_RAW-3.raw	14	P04114|APOB_HUMAN			FALSE
SGAGTEDSAC(+57.02)IPWAYYSTVDQVK	46.37	2504.12	23	-0.8	835.712	3	24.3309	302000	2760000	5711	20210614_HS_50ng_RAW-5.raw	4	E9PFZ2|E9PFZ2_HUMAN;H7C5R1|H7C5R1_HUMAN;P00450|CERU_HUMAN	Carbamidomethylation	C10:Carbamidomethylation:1000.00	FALSE
SGAQATWTELPWPHEK	72.42	1836.88	16	-0.5	613.3	3	23.1491	28500000	175000000	5283	20210614_HS_50ng_RAW-15.raw	36	P02790|HEMO_HUMAN			FALSE
SGFSFGFK	29.58	875.418	8	1.6	438.717	2	20.6717	9930	115000	4537	20210614_HS_50ng_RAW-15.raw	1	F5GY80|F5GY80_HUMAN;P07358|CO8B_HUMAN;F5H7G1|F5H7G1_HUMAN			FALSE
SGGGFSSGSAGIINYQR	44.65	1656.79	17	6.6	829.405	2	18.2835			3852	20210614_HS_50ng_RAW-9.raw	1	#CONTAM#cont|000132|;#CONTAM#cont|000135|;#CONTAM#cont|000134|;P04264|K2C1_HUMAN			FALSE
SGIPIVTSPYQIHFTK	75.19	1786.96	16	-0.1	596.661	3	24.1444	23600000	181000000	5680	20210614_HS_50ng_RAW-4.raw	30	P01024|CO3_HUMAN			FALSE
SGLSTGWTQLSK	56.65	1263.65	12	1.3	632.831	2	18.893	9870000	76500000	3978	20210614_HS_50ng_RAW-8.raw	16	P04217|A1BG_HUMAN;M0R009|M0R009_HUMAN			FALSE
SGSDEVQVGQQR	31.41	1288.6	12	-3.8	645.305	2	4.7592	16500	334000	885	20210614_HS_50ng_RAW-1.raw	2	P01024|CO3_HUMAN;M0QXZ3|M0QXZ3_HUMAN			FALSE
SGTASVVC(+57.02)LLN(+0.98)NFYPR	76.6	1797.87	16	1.1	899.944	2	24.6189	21400000	176000000	5743	20210614_HS_50ng_RAW-8.raw	33	A0A5H1ZRQ3|A0A5H1ZRQ3_HUMAN;P01834|IGKC_HUMAN	Carbamidomethylation; Deamidation (NQ)	C8:Carbamidomethylation:1000.00;N11:Deamidation (NQ):10.11	FALSE
SGTASVVC(+57.02)LLNN(+0.98)FYPR	74.53	1797.87	16	-0.3	899.943	2	25.7033	3260000	25800000	6429	20210614_HS_50ng_RAW-1.raw	22	A0A5H1ZRQ3|A0A5H1ZRQ3_HUMAN;P01834|IGKC_HUMAN	Carbamidomethylation; Deamidation (NQ)	C8:Carbamidomethylation:1000.00;N12:Deamidation (NQ):17.01	FALSE
SGTASVVC(+57.02)LLNNFYPR	82.65	1796.89	16	-3.6	599.968	3	27.172	28600000	193000000	6745	20210614_HS_50ng_RAW-1.raw	32	A0A5H1ZRQ3|A0A5H1ZRQ3_HUMAN;P01834|IGKC_HUMAN	Carbamidomethylation	C8:Carbamidomethylation:1000.00	FALSE
SGTSASLAISGLR	68.58	1218.66	13	2.4	610.335	2	18.481	5440000	35600000	3803	20210614_HS_50ng_RAW-2.raw	14				FALSE
SHC(+57.02)IAEVENDEM(+15.99)PADLPSLAADFVESK	93.43	2989.33	27	-1.1	997.45	3	26.102	46600000	414000000	6143	20210614_HS_50ng_RAW-4.raw	28	A0A0C4DGB6|A0A0C4DGB6_HUMAN;P02768|ALBU_HUMAN;C9JKR2|C9JKR2_HUMAN;D6RHD5|D6RHD5_HUMAN;B7WNR0|B7WNR0_HUMAN;H0YA55|H0YA55_HUMAN	Carbamidomethylation; Oxidation (M)	C3:Carbamidomethylation:1000.00	FALSE
SHC(+57.02)IAEVENDEMPADLPSLAADFVESK	91.54	2973.34	27	5.3	992.122	3	28.1881	24400000	137000000	6048	20210614_HS_50ng_RAW-2.raw	20	A0A0C4DGB6|A0A0C4DGB6_HUMAN;P02768|ALBU_HUMAN;C9JKR2|C9JKR2_HUMAN;D6RHD5|D6RHD5_HUMAN;B7WNR0|B7WNR0_HUMAN;H0YA55|H0YA55_HUMAN	Carbamidomethylation	C3:Carbamidomethylation:1000.00	FALSE
SIAQYWLGC(+57.02)PAPGHL	70.17	1668.81	15	3.7	835.414	2	24.9838	1990000	16800000	6254	20210614_HS_50ng_RAW-1.raw	14	P04004|VTNC_HUMAN	Carbamidomethylation	C9:Carbamidomethylation:1000.00	FALSE
SIEVFGQFN(+0.98)GK	49.49	1225.6	11	0.9	613.807	2	20.2983	573000	3860000	4446	20210614_HS_50ng_RAW-3.raw	4	P02748|CO9_HUMAN	Deamidation (NQ)	N9:Deamidation (NQ):32.28	FALSE
SISTAYLQWSSLK	57.73	1482.77	13	4.6	742.397	2	23.7549	322000	5070000	5480	20210614_HS_50ng_RAW-3.raw	11	A0A0C4DH38|HV551_HUMAN			FALSE
SITC(+57.02)IHGVWTQLPQC(+57.02)VAIDK	26.9	2325.16	20	0.8	776.062	3	24.5791	29700	464000	5800	20210614_HS_50ng_RAW-4.raw	1	P08603|CFAH_HUMAN	Carbamidomethylation; Carbamidomethylation	C4:Carbamidomethylation:1000.00;C15:Carbamidomethylation:1000.00	FALSE
SLDFTELDVAAEK	67.3	1436.7	13	-0.7	719.359	2	22.2297	3170000	38600000	5033	20210614_HS_50ng_RAW-3.raw	15	P01019|ANGT_HUMAN			FALSE
SLDLDSIIAEVK	51.11	1301.71	12	2.4	651.863	2	26.303	1540000	17300000	6119	20210614_HS_50ng_RAW-6.raw	15	#CONTAM#cont|000132|;#CONTAM#cont|000135|;#CONTAM#cont|000134|;P04264|K2C1_HUMAN			FALSE
SLGEC(+57.02)C(+57.02)DVEDSTTC(+57.02)FNAK	114.6	2091.82	18	0.2	1046.92	2	17.0114	3350000	34500000	3407	20210614_HS_50ng_RAW-8.raw	23	P02774|VTDB_HUMAN;D6RF35|D6RF35_HUMAN	Carbamidomethylation; Carbamidomethylation; Carbamidomethylation	C5:Carbamidomethylation:1000.00;C6:Carbamidomethylation:1000.00;C14:Carbamidomethylation:1000.00	FALSE
SLHTLFGDK	68.09	1016.53	9	-2.5	509.271	2	15.3971	369000000	2130000000	3113	20210614_HS_50ng_RAW-5.raw	103	A0A0C4DGB6|A0A0C4DGB6_HUMAN;A0A087WWT3|A0A087WWT3_HUMAN;P02768|ALBU_HUMAN;H7C013|H7C013_HUMAN			FALSE
SLHTLFGDKLC(+57.02)TVATLR	74.15	1931.03	17	0.1	483.765	4	23.7863	461000	6410000	5500	20210614_HS_50ng_RAW-6.raw	12	A0A0C4DGB6|A0A0C4DGB6_HUMAN;A0A087WWT3|A0A087WWT3_HUMAN;P02768|ALBU_HUMAN;H7C013|H7C013_HUMAN	Carbamidomethylation	C11:Carbamidomethylation:1000.00	FALSE
SLN(+0.98)NQFASFIDK	43.35	1383.67	12	5.7	692.845	2	22.2503	14500	611000	5043	20210614_HS_50ng_RAW-6.raw	3	#CONTAM#cont|000132|;#CONTAM#cont|000135|;#CONTAM#cont|000134|;P04264|K2C1_HUMAN	Deamidation (NQ)	N3:Deamidation (NQ):14.02	FALSE
SLNNQFASFIDK	63.99	1382.68	12	0.1	692.349	2	22.1242	4450000	44300000	5036	20210614_HS_50ng_RAW-3.raw	13	#CONTAM#cont|000132|;#CONTAM#cont|000135|;#CONTAM#cont|000134|;P04264|K2C1_HUMAN			FALSE
SLPVSDSVLSGFEQR	64.75	1619.82	15	2.9	810.917	2	22.9628	902000	10800000	5266	20210614_HS_50ng_RAW-3.raw	14	P07360|CO8G_HUMAN			FALSE
SLWDFLK	44.11	907.48	7	-0.3	454.747	2	25.9525	902000	5900000	6016	20210614_HS_50ng_RAW-3.raw	14	P04114|APOB_HUMAN			FALSE
SNLDED(+21.98)IIAEENIVSR	50.97	1837.87	16	-3.5	613.627	3	22.2916	18200	272000	5098	20210614_HS_50ng_RAW-8.raw	1	P01024|CO3_HUMAN	Sodium adduct	D6:Sodium adduct:10.11	FALSE
SNLDEDIIAEENIVSR	77.03	1815.88	16	1	908.951	2	22.2666	14100000	144000000	5127	20210614_HS_50ng_RAW-5.raw	30	P01024|CO3_HUMAN			FALSE
SPDVIN(+0.98)GSPISQK	58.99	1341.68	13	-0.7	671.846	2	15.424	629000	2670000	2967	20210614_HS_50ng_RAW-6.raw	7	A0A0D9SG88|A0A0D9SG88_HUMAN;P08603|CFAH_HUMAN;Q5TFM2|Q5TFM2_HUMAN	Deamidation (NQ)	N6:Deamidation (NQ):22.09	FALSE
SPEQQETVLDGNLIIR	74.05	1810.94	16	1	906.479	2	22.2089	2430000	30600000	5103	20210614_HS_50ng_RAW-4.raw	28	Q14624|ITIH4_HUMAN;B7ZKJ8|B7ZKJ8_HUMAN;H7C0L5|H7C0L5_HUMAN			FALSE
SPQELLC(+57.02)GASLISDR	50.32	1644.81	15	3.4	823.417	2	22.3331	73700	1370000	5100	20210614_HS_50ng_RAW-8.raw	3	P00734|THRB_HUMAN;E9PIT3|E9PIT3_HUMAN	Carbamidomethylation	C7:Carbamidomethylation:1000.00	FALSE
SPVGVQ(+0.98)PILNEHTFC(+57.02)AGM(+15.99)SK	45.89	2188.03	20	4.7	730.354	3	21.9579	378000	1860000	4930	20210614_HS_50ng_RAW-3.raw	2	P00738|HPT_HUMAN;J3QLC9|J3QLC9_HUMAN;A0A087WU08|A0A087WU08_HUMAN;H0Y300|H0Y300_HUMAN;A0A0C4DGL8|A0A0C4DGL8_HUMAN;J3QR68|J3QR68_HUMAN	Deamidation (NQ); Carbamidomethylation; Oxidation (M)	Q6:Deamidation (NQ):42.68;C15:Carbamidomethylation:1000.00;M18:Oxidation (M):1000.00	FALSE
SPVGVQ(+0.98)PILNEHTFC(+57.02)AGMSK	44.09	2172.03	20	6.9	725.024	3	22.765	391000	2540000	5345	20210614_HS_50ng_RAW-7.raw	3	P00738|HPT_HUMAN;J3QLC9|J3QLC9_HUMAN;A0A087WU08|A0A087WU08_HUMAN;H0Y300|H0Y300_HUMAN;A0A0C4DGL8|A0A0C4DGL8_HUMAN;J3QR68|J3QR68_HUMAN	Deamidation (NQ); Carbamidomethylation	Q6:Deamidation (NQ):8.26;C15:Carbamidomethylation:1000.00	FALSE
SPVGVQPILN(+0.98)EHTFC(+57.02)AGM(+15.99)SK	38.61	2188.03	20	9.2	730.357	3	21.991	391000	1580000	5147	20210614_HS_50ng_RAW-10.raw	2	P00738|HPT_HUMAN;J3QLC9|J3QLC9_HUMAN;A0A087WU08|A0A087WU08_HUMAN;H0Y300|H0Y300_HUMAN;A0A0C4DGL8|A0A0C4DGL8_HUMAN;J3QR68|J3QR68_HUMAN	Deamidation (NQ); Carbamidomethylation; Oxidation (M)	N10:Deamidation (NQ):7.69;C15:Carbamidomethylation:1000.00;M18:Oxidation (M):1000.00	FALSE
SPVGVQPILNEHTFC(+57.02)AGM(+15.99)SK	69.27	2187.05	20	-3.7	730.02	3	20.7049	16500000	117000000	4917	20210614_HS_50ng_RAW-1.raw	43	P00738|HPT_HUMAN;J3QLC9|J3QLC9_HUMAN;A0A087WU08|A0A087WU08_HUMAN;H0Y300|H0Y300_HUMAN;A0A0C4DGL8|A0A0C4DGL8_HUMAN;J3QR68|J3QR68_HUMAN	Carbamidomethylation; Oxidation (M)	C15:Carbamidomethylation:1000.00	FALSE
SPVGVQPILNEHTFC(+57.02)AGMSK	79.07	2171.05	20	0	724.691	3	22.011	39500000	410000000	5541	20210614_HS_50ng_RAW-1.raw	48	P00738|HPT_HUMAN;J3QLC9|J3QLC9_HUMAN;A0A087WU08|A0A087WU08_HUMAN;H0Y300|H0Y300_HUMAN;A0A0C4DGL8|A0A0C4DGL8_HUMAN;J3QR68|J3QR68_HUMAN	Carbamidomethylation	C15:Carbamidomethylation:1000.00	FALSE
SSALDMENFR	60.59	1168.52	10	-0.9	585.266	2	17.5655	1830000	14400000	3555	20210614_HS_50ng_RAW-6.raw	11	Q5T985|Q5T985_HUMAN;Q5T987|Q5T987_HUMAN;P19823|ITIH2_HUMAN			FALSE
SSGSLLNN(+0.98)AIK	24.93	1103.58	11	-0.5	552.798	2	13.1701	51400	187000	2596	20210614_HS_50ng_RAW-12.raw	1	P01023|A2MG_HUMAN;P20742|PZP_HUMAN	Deamidation (NQ)	N8:Deamidation (NQ):14.02	FALSE
SSGSLLNNAIK	67.37	1102.6	11	9.5	552.312	2	14.3656	1550000	6190000	3046	20210614_HS_50ng_RAW-1.raw	15	P01023|A2MG_HUMAN;P20742|PZP_HUMAN			FALSE
SSLSVPYVIVPLK	63.11	1400.83	13	1.4	701.422	2	25.6529	30800000	365000000	6451	20210614_HS_50ng_RAW-1.raw	23	P01024|CO3_HUMAN			FALSE
SSN(+0.98)NPHSPIVEEFQVPYNK	37.84	2186.03	19	9.2	729.69	3	21.1476			4842	20210614_HS_50ng_RAW-11.raw	1	A0A087X232|A0A087X232_HUMAN;P09871|C1S_HUMAN	Deamidation (NQ)	N3:Deamidation (NQ):0.00	FALSE
SSNLIILEEHLK	64.76	1394.78	12	0.8	465.933	3	21.8872	1080000	13900000	4947	20210614_HS_50ng_RAW-8.raw	17	P08603|CFAH_HUMAN			FALSE
SSNNPHSPIVEEFQVPYNK	48	2185.04	19	1.8	729.357	3	21.2112	638000	6140000	4791	20210614_HS_50ng_RAW-4.raw	10	A0A087X232|A0A087X232_HUMAN;P09871|C1S_HUMAN			FALSE
SSSNEEVM(+15.99)FLTVQVK	44.31	1712.83	15	4	857.425	2	21.6392	19300	515000	4965	20210614_HS_50ng_RAW-7.raw	2	P01023|A2MG_HUMAN;F8W7L3|F8W7L3_HUMAN	Oxidation (M)		FALSE
STSESTAALGC(+57.02)LVK	66.68	1422.7	14	0.9	712.359	2	18.2159	6450000	68200000	3821	20210614_HS_50ng_RAW-5.raw	30	P01859|IGHG2_HUMAN;A0A286YEY4|A0A286YEY4_HUMAN	Carbamidomethylation	C11:Carbamidomethylation:1000.00	FALSE
STSGGTAALGC(+57.02)LVK	67.38	1320.67	14	3	661.345	2	18.5462	128000000	1260000000	3978	20210614_HS_50ng_RAW-15.raw	65	A0A4W9A917|A0A4W9A917_HUMAN;P01857|IGHG1_HUMAN;P01860|IGHG3_HUMAN;A0A0A0MS08|A0A0A0MS08_HUMAN;A0A0A0MS07|A0A0A0MS07_HUMAN;A0A286YES1|A0A286YES1_HUMAN	Carbamidomethylation	C11:Carbamidomethylation:1000.00	FALSE
SVIPSDGPSVAC(+57.02)VK	74.45	1414.71	14	1.9	708.365	2	18.0346	19600000	228000000	3731	20210614_HS_50ng_RAW-15.raw	45	F8WCI6|F8WCI6_HUMAN;P02787|TRFE_HUMAN;F8WEK9|F8WEK9_HUMAN;C9JB55|C9JB55_HUMAN	Carbamidomethylation	C12:Carbamidomethylation:1000.00	FALSE
SVLGQLGITK	49.61	1014.61	10	-2.8	508.31	2	19.5142	91400000	686000000	4519	20210614_HS_50ng_RAW-1.raw	15				FALSE
SVPPSASHVAPTETFTYEWTVPK	46.33	2530.24	23	0.3	844.42	3	23.9053	1900000	6770000	5595	20210614_HS_50ng_RAW-4.raw	7	E9PFZ2|E9PFZ2_HUMAN;H7C5R1|H7C5R1_HUMAN;P00450|CERU_HUMAN			FALSE
SVSDGIAALDLNAVANK	41.82	1656.87	17	0.3	829.442	2	22.4475	131000	1770000	5218	20210614_HS_50ng_RAW-9.raw	1	P04114|APOB_HUMAN			FALSE
SVSLPSLDPASAK	57.72	1270.68	13	1.3	636.346	2	19.7431	1900000	17900000	4253	20210614_HS_50ng_RAW-15.raw	15	A8MUN2|A8MUN2_HUMAN;P04114|APOB_HUMAN			FALSE
SYSC(+57.02)Q(+0.98)VTHEGSTVEK	36.67	1711.74	15	6.9	856.881	2	5.1788			901	20210614_HS_50ng_RAW-10.raw	2	P0DOY2|IGLC2_HUMAN;A0A0B4J231|A0A0B4J231_HUMAN;P0DOY3|IGLC3_HUMAN;B9A064|IGLL5_HUMAN	Carbamidomethylation; Deamidation (NQ)	C4:Carbamidomethylation:1000.00	FALSE
SYSC(+57.02)QVTHEGSTVEK	55.08	1710.75	15	-3	571.256	3	5.0186	85800000	221000000	907	20210614_HS_50ng_RAW-1.raw	63	P0DOY2|IGLC2_HUMAN;A0A0B4J231|A0A0B4J231_HUMAN;P0DOY3|IGLC3_HUMAN;B9A064|IGLL5_HUMAN	Carbamidomethylation	C4:Carbamidomethylation:1000.00	FALSE
TAAENDFVTLK	53.81	1207.61	11	-0.1	604.812	2	16.0993	747000	4320000	3490	20210614_HS_50ng_RAW-1.raw	15				FALSE
TAGWNIPM(+15.99)GLLYNK	65.96	1592.8	14	4	797.412	2	24.3816	28600000	146000000	5607	20210614_HS_50ng_RAW-15.raw	52	H7C5E8|H7C5E8_HUMAN;P02787|TRFE_HUMAN	Oxidation (M)		FALSE
TAGWNIPMGLLYNK	72.89	1576.81	14	-0.6	789.41	2	26.663	28200000	247000000	6782	20210614_HS_50ng_RAW-1.raw	28	H7C5E8|H7C5E8_HUMAN;P02787|TRFE_HUMAN			FALSE
TC(+57.02)PKPDDLPFSTVVPLK	56.46	1913	17	-0.2	638.673	3	24.1207	8700000	86600000	5581	20210614_HS_50ng_RAW-3.raw	15	J3QRN2|J3QRN2_HUMAN;P02749|APOH_HUMAN	Carbamidomethylation	C2:Carbamidomethylation:1000.00	FALSE
TC(+57.02)VAD(+21.98)ESAENC(+57.02)DK	37.08	1519.55	13	-6.1	760.779	2	3.4097			565	20210614_HS_50ng_RAW-1.raw	1	A0A0C4DGB6|A0A0C4DGB6_HUMAN;A0A087WWT3|A0A087WWT3_HUMAN;P02768|ALBU_HUMAN;H7C013|H7C013_HUMAN	Carbamidomethylation; Sodium adduct; Carbamidomethylation	C2:Carbamidomethylation:1000.00;D5:Sodium adduct:0.00;C11:Carbamidomethylation:1000.00	FALSE
TC(+57.02)VADESAE(+21.98)NC(+57.02)DK	28.17	1519.55	13	-8.2	760.778	2	4.8272			889	20210614_HS_50ng_RAW-1.raw	1	A0A0C4DGB6|A0A0C4DGB6_HUMAN;A0A087WWT3|A0A087WWT3_HUMAN;P02768|ALBU_HUMAN;H7C013|H7C013_HUMAN	Carbamidomethylation; Sodium adduct; Carbamidomethylation	C2:Carbamidomethylation:1000.00;E9:Sodium adduct:11.12;C11:Carbamidomethylation:1000.00	FALSE
TC(+57.02)VADESAEN(+0.98)C(+57.02)DK	63.13	1498.56	13	9.2	750.292	2	2.7127	2200000	10200000	593	20210614_HS_50ng_RAW-4.raw	26	A0A0C4DGB6|A0A0C4DGB6_HUMAN;A0A087WWT3|A0A087WWT3_HUMAN;P02768|ALBU_HUMAN;H7C013|H7C013_HUMAN	Carbamidomethylation; Deamidation (NQ); Carbamidomethylation	C2:Carbamidomethylation:1000.00;C11:Carbamidomethylation:1000.00	FALSE
TC(+57.02)VADESAENC(+57.02)DK	99.73	1497.57	13	0.5	749.793	2	2.3626	38400000	119000000	364	20210614_HS_50ng_RAW-4.raw	167	A0A0C4DGB6|A0A0C4DGB6_HUMAN;A0A087WWT3|A0A087WWT3_HUMAN;P02768|ALBU_HUMAN;H7C013|H7C013_HUMAN	Carbamidomethylation; Carbamidomethylation	C2:Carbamidomethylation:1000.00;C11:Carbamidomethylation:1000.00	FALSE
TEDTIFLR	51.13	993.513	8	0.1	497.764	2	17.3748	24600000	178000000	3505	20210614_HS_50ng_RAW-5.raw	31	P02763|A1AG1_HUMAN;P19652|A1AG2_HUMAN			FALSE
TEGDGVYTLN(+0.98)DK	39.55	1311.58	12	9.8	656.803	2	8.533	61800	548000	1645	20210614_HS_50ng_RAW-2.raw	1	P00738|HPT_HUMAN;J3QLC9|J3QLC9_HUMAN;H0Y300|H0Y300_HUMAN;A0A0C4DGL8|A0A0C4DGL8_HUMAN;J3KRH2|J3KRH2_HUMAN;J3QR68|J3QR68_HUMAN	Deamidation (NQ)		FALSE
TEGDGVYTLN(+0.98)NEK	34.98	1439.64	13	-2.2	720.827	2	7.3184	147000	1310000	1560	20210614_HS_50ng_RAW-1.raw	2	P00738|HPT_HUMAN;J3QLC9|J3QLC9_HUMAN;H3BS21|H3BS21_HUMAN;J3KRH2|J3KRH2_HUMAN	Deamidation (NQ)	N10:Deamidation (NQ):8.69	FALSE
TEGDGVYTLNDK	65.83	1310.6	12	-6.4	656.303	2	7.7481	21200000	55600000	1542	20210614_HS_50ng_RAW-4.raw	32	P00738|HPT_HUMAN;J3QLC9|J3QLC9_HUMAN;H0Y300|H0Y300_HUMAN;A0A0C4DGL8|A0A0C4DGL8_HUMAN;J3KRH2|J3KRH2_HUMAN;J3QR68|J3QR68_HUMAN			FALSE
TEGDGVYTLNNEK	51.79	1438.66	13	-9.2	720.327	2	8.2506	552000	2170000	1610	20210614_HS_50ng_RAW-2.raw	2	P00738|HPT_HUMAN;J3QLC9|J3QLC9_HUMAN;H3BS21|H3BS21_HUMAN;J3KRH2|J3KRH2_HUMAN			FALSE
TEHGSEM(+15.99)LFFGNAIEGK	39.6	1881.86	17	-0.7	628.292	3	21.0068	1190000	14200000	4851	20210614_HS_50ng_RAW-13.raw	10	P04114|APOB_HUMAN	Oxidation (M)		FALSE
TEHPFTVEEFVLPK	74.04	1671.85	14	1.7	558.292	3	24.2432	33800000	193000000	5673	20210614_HS_50ng_RAW-5.raw	34	P01023|A2MG_HUMAN			FALSE
TELRPGETLNVNFLLR	74.59	1871.03	16	2.9	624.685	3	25.5829	544000	5600000	5922	20210614_HS_50ng_RAW-3.raw	7	P01024|CO3_HUMAN			FALSE
TEQWSTLPPETK	65.74	1415.69	12	-4.2	708.851	2	17.0436	2310000	9770000	3464	20210614_HS_50ng_RAW-4.raw	18				FALSE
TEVIPPLIENR	63.17	1279.71	11	2.9	640.866	2	20.8278	4800000	33600000	4645	20210614_HS_50ng_RAW-5.raw	13	P04114|APOB_HUMAN			FALSE
TEVNVLPGAK	57.43	1026.57	10	0.7	514.293	2	11.9555	1970000	2800000	2279	20210614_HS_50ng_RAW-15.raw	7	Q5T985|Q5T985_HUMAN;Q5T987|Q5T987_HUMAN;P19823|ITIH2_HUMAN			FALSE
TEVSSNHVLIYLDK	81.65	1616.84	14	-0.9	809.427	2	20.1223	14500000	121000000	4421	20210614_HS_50ng_RAW-5.raw	31	P01023|A2MG_HUMAN			FALSE
TFTC(+57.02)TAAYPESK	65.66	1374.61	12	-2.2	688.312	2	11.5803	16200000	39400000	2115	20210614_HS_50ng_RAW-6.raw	57	P01876|IGHA1_HUMAN;A0A286YEY1|A0A286YEY1_HUMAN	Carbamidomethylation	C4:Carbamidomethylation:1000.00	FALSE
TFTPQPPGLER	23.88	1241.64	11	3.5	621.83	2	17.6267	15000	150000	3699	20210614_HS_50ng_RAW-11.raw	1	P35858|ALS_HUMAN			FALSE
TFYEPGEEITYSC(+57.02)KPGYVSR	64.46	2382.08	20	1.5	795.036	3	20.3782	1630000	12700000	4509	20210614_HS_50ng_RAW-5.raw	12	J3QRN2|J3QRN2_HUMAN;P02749|APOH_HUMAN	Carbamidomethylation	C13:Carbamidomethylation:1000.00	FALSE
TGISPLALIK	55.03	1011.63	10	1.7	506.825	2	23.3603	2730000	24300000	5374	20210614_HS_50ng_RAW-6.raw	14	A8MUN2|A8MUN2_HUMAN;P04114|APOB_HUMAN			FALSE
TGLLLLSDPDK	53.55	1170.65	11	-0.3	586.332	2	21.1042	203000	1110000	4811	20210614_HS_50ng_RAW-4.raw	14	Q14624|ITIH4_HUMAN;B7ZKJ8|B7ZKJ8_HUMAN;H7C0L5|H7C0L5_HUMAN			FALSE
TGLQEVEVK	55.5	1001.54	9	-3.4	501.775	2	8.2365	18600000	39100000	1638	20210614_HS_50ng_RAW-3.raw	31	P01024|CO3_HUMAN			FALSE
THLAPYSDELR	63.25	1300.64	11	-3.8	434.553	3	14.7571	14500000	59200000	2794	20210614_HS_50ng_RAW-3.raw	52	F8W696|F8W696_HUMAN;P02647|APOA1_HUMAN			FALSE
THLPEVFLSK	63.64	1169.64	10	3.8	585.832	2	19.8397	3510000	27400000	4277	20210614_HS_50ng_RAW-15.raw	15	P02774|VTDB_HUMAN;D6RF35|D6RF35_HUMAN			FALSE
THTC(+57.02)PPC(+57.02)PAPELLGGPSVFLFPPKPK	96.75	2843.45	26	-4.9	711.866	4	27.5688	2530000	10700000	6418	20210614_HS_50ng_RAW-5.raw	12	P01857|IGHG1_HUMAN;A0A0A0MS08|A0A0A0MS08_HUMAN;A0A0A0MS07|A0A0A0MS07_HUMAN	Carbamidomethylation; Carbamidomethylation	C4:Carbamidomethylation:1000.00;C7:Carbamidomethylation:1000.00	FALSE
TILDDLR	32.86	844.465	7	-1.1	423.24	2	17.5848	2020000	8350000	3751	20210614_HS_50ng_RAW-13.raw	16	#CONTAM#cont|000108|;Q5T985|Q5T985_HUMAN;P19823|ITIH2_HUMAN			FALSE
TIYTPGSTVLYR	60.77	1369.72	12	-1	685.869	2	19.282	2000000	16700000	4457	20210614_HS_50ng_RAW-1.raw	22	P01024|CO3_HUMAN			FALSE
TLADLTLLDSPIK	70.03	1398.8	13	-5.2	700.402	2	25.3552	3090000	23800000	5867	20210614_HS_50ng_RAW-3.raw	15	P04114|APOB_HUMAN			FALSE
TLEAQLTPR	55.6	1027.57	9	0.4	514.791	2	12.7795	1780000	3330000	2420	20210614_HS_50ng_RAW-15.raw	9	P05546|HEP2_HUMAN			FALSE
TLLDIDNTR	35.82	1059.56	9	-1.9	530.784	2	15.6216	4980000	17800000	3440	20210614_HS_50ng_RAW-1.raw	14	P35527|K1C9_HUMAN			FALSE
TLLPVSKPEIR	44.7	1251.76	11	-1.3	418.258	3	18.6947	60300	950000	3988	20210614_HS_50ng_RAW-9.raw	3	P01031|CO5_HUMAN			FALSE
TLLSNLEEAK	57.22	1116.6	10	2	559.31	2	19.0283	5250000	44200000	4021	20210614_HS_50ng_RAW-8.raw	15	H0YLK8|H0YLK8_HUMAN;P10909|CLUS_HUMAN;E7ETB4|E7ETB4_HUMAN;E7ERK6|E7ERK6_HUMAN			FALSE
TLM(+15.99)FGSYLDDEK	47.31	1433.64	12	4.2	717.83	2	20.6474	195000	1730000	4672	20210614_HS_50ng_RAW-12.raw	6	P19652|A1AG2_HUMAN	Oxidation (M)		FALSE
TLMFGSYLDDEK	66.28	1417.64	12	-2.1	709.827	2	22.2392	2110000	21100000	5056	20210614_HS_50ng_RAW-8.raw	15	P19652|A1AG2_HUMAN			FALSE
TLN(+0.98)NDIMLIK	34.86	1174.63	10	1.7	588.322	2	21.2772	256000	1960000	4876	20210614_HS_50ng_RAW-11.raw	4		Deamidation (NQ)	N3:Deamidation (NQ):0.00	FALSE
TLQGIPQM(+15.99)IGEVIR	39.78	1569.85	14	4.4	785.938	2	23.3549	4120000	29700000	5412	20210614_HS_50ng_RAW-14.raw	13	P04114|APOB_HUMAN	Oxidation (M)		FALSE
TM(+15.99)QALPYSTVGN(+0.98)SNNYLHLSVLR	30.82	2594.28	23	7.9	865.774	3	24.7924	17000	269000	5984	20210614_HS_50ng_RAW-10.raw	1	P01024|CO3_HUMAN	Oxidation (M); Deamidation (NQ)	M2:Oxidation (M):1000.00;N12:Deamidation (NQ):0.00	FALSE
TM(+15.99)QALPYSTVGNSNNYLHLSVLR	39.34	2593.3	23	3.7	865.442	3	24.8553	85700	1270000	5920	20210614_HS_50ng_RAW-7.raw	5	P01024|CO3_HUMAN	Oxidation (M)		FALSE
TMQALPYSTVGN(+0.98)SNNYLHLSVLR	39.18	2578.28	23	8.8	860.443	3	25.7972	2600	128000	5971	20210614_HS_50ng_RAW-3.raw	1	P01024|CO3_HUMAN	Deamidation (NQ)	N12:Deamidation (NQ):0.00	FALSE
TMQALPYSTVGNSNNYLHLSVLR	47.06	2577.3	23	-5.5	860.103	3	25.7408	48100	969000	6077	20210614_HS_50ng_RAW-4.raw	4	P01024|CO3_HUMAN			FALSE
TNAENEFVTIK	58.13	1264.63	11	1.2	633.323	2	16.7866	8330000	40100000	3344	20210614_HS_50ng_RAW-8.raw	16	#CONTAM#cont|000132|;#CONTAM#cont|000135|;#CONTAM#cont|000134|;P04264|K2C1_HUMAN			FALSE
TNFDNDIALVR	50.61	1276.64	11	3.4	639.328	2	20.0573	248000	2730000	4263	20210614_HS_50ng_RAW-2.raw	3	A0A087X232|A0A087X232_HUMAN;P09871|C1S_HUMAN			FALSE
TNLESILSYPK	70.34	1263.67	11	2.1	632.844	2	22.4518	16500000	70500000	5143	20210614_HS_50ng_RAW-5.raw	15	H9KV48|H9KV48_HUMAN;P05155|IC1_HUMAN;E9PGN7|E9PGN7_HUMAN			FALSE
TNQVNSGGVLLR	40.44	1256.68	12	1.1	629.348	2	14.0988	374000	1650000	2719	20210614_HS_50ng_RAW-2.raw	6	P02747|C1QC_HUMAN			FALSE
TPEVTC(+57.02)VVVD(+21.98)VSHEDPEVK	56.47	2160	19	1.2	721.009	3	20.9829	1480000	17400000	4688	20210614_HS_50ng_RAW-5.raw	14	P01857|IGHG1_HUMAN;A0A0A0MS08|A0A0A0MS08_HUMAN;A0A0A0MS07|A0A0A0MS07_HUMAN	Carbamidomethylation; Sodium adduct	C6:Carbamidomethylation:1000.00;D10:Sodium adduct:14.15	FALSE
TPEVTC(+57.02)VVVDVSHE(+21.98)DPEVK	33.64	2160	19	1.7	541.009	4	20.9371	58200	705000	4847	20210614_HS_50ng_RAW-13.raw	1	P01857|IGHG1_HUMAN;A0A0A0MS08|A0A0A0MS08_HUMAN;A0A0A0MS07|A0A0A0MS07_HUMAN	Carbamidomethylation; Sodium adduct	C6:Carbamidomethylation:1000.00;E14:Sodium adduct:0.00	FALSE
TPEVTC(+57.02)VVVDVSHEDPEVK	80.7	2138.02	19	-8.5	713.675	3	20.984	147000000	1180000000	4625	20210614_HS_50ng_RAW-3.raw	98	P01857|IGHG1_HUMAN;A0A0A0MS08|A0A0A0MS08_HUMAN;A0A0A0MS07|A0A0A0MS07_HUMAN	Carbamidomethylation	C6:Carbamidomethylation:1000.00	FALSE
TPLTATLSK	63.96	930.539	9	0.1	466.277	2	8.9196	67000000	87100000	1657	20210614_HS_50ng_RAW-15.raw	54	P01876|IGHA1_HUMAN;A0A286YEY1|A0A286YEY1_HUMAN			FALSE
TQFNNNEYSQDLDAYNTK	69.5	2163.93	18	3.5	1082.98	2	18.2077	1020000	10800000	3782	20210614_HS_50ng_RAW-8.raw	17	P04114|APOB_HUMAN			FALSE
TSDQIHFFFAK	56.65	1339.66	11	-1	447.559	3	22.3171	2100000	17100000	5068	20210614_HS_50ng_RAW-3.raw	18	P01008|ANT3_HUMAN;Q8TCE1|Q8TCE1_HUMAN			FALSE
TSESGELHGLTTEEEFVEGIYK	75.04	2454.14	22	1.3	819.056	3	24.3325	10200000	83700000	5651	20210614_HS_50ng_RAW-6.raw	15	P02766|TTHY_HUMAN;A0A087WT59|A0A087WT59_HUMAN			FALSE
TSNFNAAISLK	70.82	1164.61	11	1.3	583.315	2	18.2277	1110000	7260000	3780	20210614_HS_50ng_RAW-8.raw	12	P02748|CO9_HUMAN			FALSE
TSSFALNLPTLPEVK	68.79	1615.88	15	0.8	808.949	2	26.2832	1620000	14300000	6569	20210614_HS_50ng_RAW-1.raw	14	P04114|APOB_HUMAN			FALSE
TTNIQGINLLFSSR	82.27	1562.84	14	1.3	782.429	2	24.7056	4440000	34200000	6181	20210614_HS_50ng_RAW-1.raw	15				FALSE
TTPPM(+15.99)LDSDGSFFLYSK	52.15	1920.88	17	2.4	961.45	2	23.7944	12400000	30800000	5495	20210614_HS_50ng_RAW-8.raw	21	P01859|IGHG2_HUMAN;A0A286YEY4|A0A286YEY4_HUMAN	Oxidation (M)		FALSE
TTPPMLDSDGSFFLYSK	50.73	1904.89	17	2	953.452	2	24.9255	22700000	66000000	5904	20210614_HS_50ng_RAW-15.raw	27	P01859|IGHG2_HUMAN;A0A286YEY4|A0A286YEY4_HUMAN			FALSE
TTPPVLD(+21.98)SDGSFFLYSK	60.68	1894.9	17	-1.8	632.638	3	25.0329	269000	2220000	5794	20210614_HS_50ng_RAW-3.raw	2	P01857|IGHG1_HUMAN;A0A0A0MS08|A0A0A0MS08_HUMAN;A0A0A0MS07|A0A0A0MS07_HUMAN	Sodium adduct	D7:Sodium adduct:32.28	FALSE
TTPPVLDSD(+21.98)GSFFLYSK	66.1	1894.9	17	-1.4	632.639	3	25.0468	1840000	14000000	5817	20210614_HS_50ng_RAW-6.raw	12	P01857|IGHG1_HUMAN;A0A0A0MS08|A0A0A0MS08_HUMAN;A0A0A0MS07|A0A0A0MS07_HUMAN	Sodium adduct	D9:Sodium adduct:0.00	FALSE
TTPPVLDSDGSFFLYSK	72.45	1872.91	17	1.9	937.466	2	24.6789	144000000	650000000	5945	20210614_HS_50ng_RAW-5.raw	74	P01857|IGHG1_HUMAN;A0A0A0MS08|A0A0A0MS08_HUMAN;A0A0A0MS07|A0A0A0MS07_HUMAN			FALSE
TTPPVLDSDGSFFLYSR	52.93	1900.92	17	1.5	951.469	2	25.3074	1780000	12800000	5943	20210614_HS_50ng_RAW-5.raw	10				FALSE
TVAAC(+57.02)NLPIVR	50.68	1212.66	11	2.6	607.341	2	18.5232	1550000	17600000	3926	20210614_HS_50ng_RAW-4.raw	15	P02760|AMBP_HUMAN	Carbamidomethylation	C5:Carbamidomethylation:1000.00	FALSE
TVAAPSVFIFPPSD(+21.98)EQLK	50.61	1967	18	0	656.674	3	26.199	17600000	58300000	6080	20210614_HS_50ng_RAW-6.raw	17	A0A5H1ZRQ3|A0A5H1ZRQ3_HUMAN;P01834|IGKC_HUMAN	Sodium adduct	D14:Sodium adduct:12.28	FALSE
TVAAPSVFIFPPSDEQLK	78.42	1945.02	18	-1.8	973.515	2	25.9143	393000000	3040000000	6600	20210614_HS_50ng_RAW-1.raw	116	A0A5H1ZRQ3|A0A5H1ZRQ3_HUMAN;P01834|IGKC_HUMAN			FALSE
TVM(+15.99)VNIENPEGIPVK	74.73	1654.86	15	1.9	828.439	2	20.3544	10100000	62300000	4817	20210614_HS_50ng_RAW-1.raw	34	P01024|CO3_HUMAN	Oxidation (M)		FALSE
TVMVNIENPEGIPVK	67.06	1638.87	15	-0.9	820.439	2	21.488	14600000	180000000	5178	20210614_HS_50ng_RAW-1.raw	21	P01024|CO3_HUMAN			FALSE
TVQAVLTVPK	52.18	1054.64	10	0.4	528.327	2	17.6955	856000	5530000	3624	20210614_HS_50ng_RAW-8.raw	15	P36955|PEDF_HUMAN			FALSE
TWYPEVPK	45.6	1018.51	8	-1.3	510.263	2	18.8986	2320000	17600000	3966	20210614_HS_50ng_RAW-6.raw	12	P04003|C4BPA_HUMAN			FALSE
TYE(+21.98)TTLEK	35.15	1005.46	8	-4.6	503.736	2	5.1162	33500000	51400000	1134	20210614_HS_50ng_RAW-1.raw	25	A0A0C4DGB6|A0A0C4DGB6_HUMAN;P02768|ALBU_HUMAN;C9JKR2|C9JKR2_HUMAN;D6RHD5|D6RHD5_HUMAN;B7WNR0|B7WNR0_HUMAN;H0YA55|H0YA55_HUMAN	Sodium adduct	E3:Sodium adduct:0.00	FALSE
TYETTLEK	50.24	983.481	8	-4.7	492.745	2	5.2819	577000000	3240000000	1044	20210614_HS_50ng_RAW-1.raw	325	A0A0C4DGB6|A0A0C4DGB6_HUMAN;P02768|ALBU_HUMAN;C9JKR2|C9JKR2_HUMAN;D6RHD5|D6RHD5_HUMAN;B7WNR0|B7WNR0_HUMAN;H0YA55|H0YA55_HUMAN			FALSE
TYFPHFDLSHGSAQVK	54.79	1832.88	16	0.4	459.229	4	21.3356	866000	7090000	4815	20210614_HS_50ng_RAW-14.raw	14	P69905|HBA_HUMAN;G3V1N2|G3V1N2_HUMAN;A0A2R8Y7C0|A0A2R8Y7C0_HUMAN			FALSE
TYM(+15.99)LAFDVNDEK	64.38	1460.65	12	2.5	731.334	2	20.0406	1150000	12500000	4396	20210614_HS_50ng_RAW-5.raw	17	P02763|A1AG1_HUMAN	Oxidation (M)		FALSE
TYMLAFDVNDEK	67.88	1444.65	12	-2	723.333	2	21.7652	3270000	24700000	4947	20210614_HS_50ng_RAW-4.raw	15	P02763|A1AG1_HUMAN			FALSE
VAEGTQVLELPFK	66.89	1429.78	13	-4.8	715.895	2	23.4919	8310000	88700000	5833	20210614_HS_50ng_RAW-1.raw	16	P01008|ANT3_HUMAN			FALSE
VATVSLPR	36.91	841.502	8	-4.4	421.757	2	10.701	67700000	359000000	2157	20210614_HS_50ng_RAW-1.raw	83	#CONTAM#cont|000144|;#CONTAM#cont|000142|;#CONTAM#cont|000023|;#CONTAM#cont|000143|;#CONTAM#cont|000141|;#CONTAM#cont|000040|;#CONTAM#cont|000032|			FALSE
VC(+57.02)PFAGILEN(+0.98)GAVR	63.83	1502.76	14	3.2	752.387	2	23.3682	4710000	34500000	5399	20210614_HS_50ng_RAW-3.raw	26	J3QLI0|J3QLI0_HUMAN;J3QRN2|J3QRN2_HUMAN;P02749|APOH_HUMAN	Carbamidomethylation; Deamidation (NQ)	C2:Carbamidomethylation:1000.00	FALSE
VC(+57.02)PFAGILENGAVR	53	1501.77	14	1.9	751.894	2	23.7319	146000	2210000	5710	20210614_HS_50ng_RAW-13.raw	3	J3QLI0|J3QLI0_HUMAN;J3QRN2|J3QRN2_HUMAN;P02749|APOH_HUMAN	Carbamidomethylation	C2:Carbamidomethylation:1000.00	FALSE
VDFTLSSER	50.29	1052.51	9	0	527.264	2	15.8398	7990000	22600000	3160	20210614_HS_50ng_RAW-12.raw	15				FALSE
VDGALC(+57.02)M(+15.99)EK	35.14	1037.45	9	-4.1	519.731	2	5.6743	35800	477000	1102	20210614_HS_50ng_RAW-1.raw	1	P02790|HEMO_HUMAN	Carbamidomethylation; Oxidation (M)	C6:Carbamidomethylation:1000.00	FALSE
VDLSFSPSQSLPASHAHLR	73.53	2048.04	19	3.6	683.691	3	20.9195	11900000	108000000	4621	20210614_HS_50ng_RAW-3.raw	29	P01023|A2MG_HUMAN			FALSE
VDNALQ(+0.98)SGN(+0.98)SQE(+21.98)SVTEQDSK	37.63	2158.91	20	4.1	720.647	3	6.4741	2020000	5540000	1139	20210614_HS_50ng_RAW-14.raw	1	A0A5H1ZRQ3|A0A5H1ZRQ3_HUMAN;P01834|IGKC_HUMAN	Deamidation (NQ); Deamidation (NQ); Sodium adduct	Q6:Deamidation (NQ):13.38;N9:Deamidation (NQ):5.03;E12:Sodium adduct:25.11	FALSE
VDNALQ(+0.98)SGN(+0.98)SQESVTEQDSK	54.4	2136.93	20	8.8	1069.48	2	7.67	195000	1070000	1387	20210614_HS_50ng_RAW-9.raw	3	A0A5H1ZRQ3|A0A5H1ZRQ3_HUMAN;P01834|IGKC_HUMAN	Deamidation (NQ); Deamidation (NQ)	Q6:Deamidation (NQ):7.38;N9:Deamidation (NQ):9.69	FALSE
VDNALQ(+0.98)SGNSQESVTEQDSK	67.86	2135.95	20	5	712.991	3	7.7548	1100000	4170000	1469	20210614_HS_50ng_RAW-2.raw	10	A0A5H1ZRQ3|A0A5H1ZRQ3_HUMAN;P01834|IGKC_HUMAN	Deamidation (NQ)	Q6:Deamidation (NQ):0.00	FALSE
VDNALQSGN(+0.98)SQ(+0.98)ESVTEQDSK	62.99	2136.93	20	8.6	713.323	3	6.7201	499000	4220000	1247	20210614_HS_50ng_RAW-5.raw	6	A0A5H1ZRQ3|A0A5H1ZRQ3_HUMAN;P01834|IGKC_HUMAN	Deamidation (NQ); Deamidation (NQ)	N9:Deamidation (NQ):9.42;Q11:Deamidation (NQ):7.38	FALSE
VDNALQSGN(+0.98)SQESVTEQDSK	60.15	2135.95	20	7.9	712.995	3	7.2956	256000	885000	1398	20210614_HS_50ng_RAW-10.raw	6	A0A5H1ZRQ3|A0A5H1ZRQ3_HUMAN;P01834|IGKC_HUMAN	Deamidation (NQ)	N9:Deamidation (NQ):0.00	FALSE
VDNALQSGNSQ(+0.98)ESVTEQDSK	69.17	2135.95	20	-4	712.986	3	6.6043	1040000	4600000	1364	20210614_HS_50ng_RAW-1.raw	11	A0A5H1ZRQ3|A0A5H1ZRQ3_HUMAN;P01834|IGKC_HUMAN	Deamidation (NQ)	Q11:Deamidation (NQ):0.00	FALSE
VDNALQSGNSQE(+21.98)SVTEQDSK	68.43	2156.94	20	-8.7	719.982	3	6.5324	71800000	299000000	1220	20210614_HS_50ng_RAW-13.raw	33	A0A5H1ZRQ3|A0A5H1ZRQ3_HUMAN;P01834|IGKC_HUMAN	Sodium adduct	E12:Sodium adduct:58.99	FALSE
VDNALQSGNSQESVTEQDSK	95.24	2134.96	20	-2.9	1068.48	2	6.4202	118000000	601000000	1369	20210614_HS_50ng_RAW-4.raw	165	A0A5H1ZRQ3|A0A5H1ZRQ3_HUMAN;P01834|IGKC_HUMAN			FALSE
VDNALQSGNSQESVTEQDSKDSTYSLSSTLTLSK	89.58	3618.7	34	3.3	905.686	4	21.4787	1010000	9590000	4869	20210614_HS_50ng_RAW-4.raw	9	A0A5H1ZRQ3|A0A5H1ZRQ3_HUMAN;P01834|IGKC_HUMAN			FALSE
VDTVDPPYPR	42.41	1157.57	10	1.9	579.794	2	13.5239	2880000	5670000	2612	20210614_HS_50ng_RAW-12.raw	14	P04004|VTNC_HUMAN			FALSE
VDVIPVNLPGEHGQR	36.25	1628.86	15	4.4	543.964	3	20.7284	102000	1460000	4752	20210614_HS_50ng_RAW-10.raw	7	P02751|FINC_HUMAN			FALSE
VEDIPLAR	32.24	911.508	8	-5.2	456.759	2	11.367	39100	139000	2414	20210614_HS_50ng_RAW-1.raw	1	P04114|APOB_HUMAN			FALSE
VELLHNPAFC(+57.02)SLATTK	76.74	1799.92	16	3.1	600.982	3	22.5007	14100000	122000000	4891	20210614_HS_50ng_RAW-2.raw	32	P01024|CO3_HUMAN	Carbamidomethylation	C10:Carbamidomethylation:1000.00	FALSE
VEYGFQVK	46.09	968.497	8	0.6	485.256	2	15.3431	4200000	13900000	2951	20210614_HS_50ng_RAW-15.raw	17				FALSE
VFDEFKPLVE(+21.98)EPQNLIK	64.06	2066.07	17	2.7	689.699	3	25.701	6130000	42200000	6030	20210614_HS_50ng_RAW-5.raw	15	A0A0C4DGB6|A0A0C4DGB6_HUMAN;A0A087WWT3|A0A087WWT3_HUMAN;P02768|ALBU_HUMAN;C9JKR2|C9JKR2_HUMAN;D6RHD5|D6RHD5_HUMAN;B7WNR0|B7WNR0_HUMAN;H0YA55|H0YA55_HUMAN	Sodium adduct	E10:Sodium adduct:0.00	FALSE
VFDEFKPLVEE(+21.98)PQNLIK	63.49	2066.07	17	4.6	689.7	3	25.6598	7370000	51200000	5978	20210614_HS_50ng_RAW-14.raw	8	A0A0C4DGB6|A0A0C4DGB6_HUMAN;A0A087WWT3|A0A087WWT3_HUMAN;P02768|ALBU_HUMAN;C9JKR2|C9JKR2_HUMAN;D6RHD5|D6RHD5_HUMAN;B7WNR0|B7WNR0_HUMAN;H0YA55|H0YA55_HUMAN	Sodium adduct	E11:Sodium adduct:27.96	FALSE
VFDEFKPLVEEPQ(+0.98)NLIK	53.72	2045.07	17	6.5	682.702	3	29.5266	65500000	461000000	7184	20210614_HS_50ng_RAW-1.raw	46	A0A0C4DGB6|A0A0C4DGB6_HUMAN;A0A087WWT3|A0A087WWT3_HUMAN;P02768|ALBU_HUMAN;C9JKR2|C9JKR2_HUMAN;D6RHD5|D6RHD5_HUMAN;B7WNR0|B7WNR0_HUMAN;H0YA55|H0YA55_HUMAN	Deamidation (NQ)	Q13:Deamidation (NQ):8.69	FALSE
VFDEFKPLVEEPQN(+0.98)LIK	80.52	2045.07	17	-6.1	682.694	3	25.53	9790000	66700000	6005	20210614_HS_50ng_RAW-5.raw	19	A0A0C4DGB6|A0A0C4DGB6_HUMAN;A0A087WWT3|A0A087WWT3_HUMAN;P02768|ALBU_HUMAN;C9JKR2|C9JKR2_HUMAN;D6RHD5|D6RHD5_HUMAN;B7WNR0|B7WNR0_HUMAN;H0YA55|H0YA55_HUMAN	Deamidation (NQ)	N14:Deamidation (NQ):10.11	FALSE
VFDEFKPLVEEPQNLIK	86.38	2044.09	17	-1.1	1023.05	2	25.4858	235000000	2760000000	6488	20210614_HS_50ng_RAW-1.raw	262	A0A0C4DGB6|A0A0C4DGB6_HUMAN;A0A087WWT3|A0A087WWT3_HUMAN;P02768|ALBU_HUMAN;C9JKR2|C9JKR2_HUMAN;D6RHD5|D6RHD5_HUMAN;B7WNR0|B7WNR0_HUMAN;H0YA55|H0YA55_HUMAN			FALSE
VFQFLEK	39.56	909.496	7	-2	455.754	2	19.4583	79200	631000	4525	20210614_HS_50ng_RAW-1.raw	2	P01031|CO5_HUMAN			FALSE
VFSLQWGEVK	55.17	1191.63	10	2	596.823	2	22.9221	1100000	10200000	5673	20210614_HS_50ng_RAW-1.raw	14	G3XAM2|G3XAM2_HUMAN;A0A2R8Y3M9|A0A2R8Y3M9_HUMAN;E7ETH0|E7ETH0_HUMAN;P05156|CFAI_HUMAN			FALSE
VFSN(+0.98)GADLSGVTE(+21.98)EAPLK	47.63	1855.88	18	0.6	928.948	2	20.9254	83800	932000	5009	20210614_HS_50ng_RAW-1.raw	1		Deamidation (NQ); Sodium adduct	N4:Deamidation (NQ):1000.00;E13:Sodium adduct:0.00	FALSE
VFSN(+0.98)GADLSGVTEEAPLK	79.55	1833.9	18	1.8	917.959	2	22.4608	150000000	998000000	5529	20210614_HS_50ng_RAW-1.raw	60		Deamidation (NQ)		FALSE
VFSNGAD(+21.98)LSGVTEEAPLK	48.86	1854.9	18	1.5	619.307	3	20.7267	747000	8320000	4583	20210614_HS_50ng_RAW-8.raw	12		Sodium adduct	D7:Sodium adduct:36.87	FALSE
VFSNGADLSGVTEEAPLK	78.14	1832.92	18	1.2	917.466	2	20.7078	44200000	401000000	4544	20210614_HS_50ng_RAW-3.raw	30				FALSE
VGAHAGEYGAEALER	43.05	1528.73	15	-1	510.582	3	12.4082	79000	332000	2432	20210614_HS_50ng_RAW-10.raw	1	P69905|HBA_HUMAN;A0A2R8Y7C0|A0A2R8Y7C0_HUMAN			FALSE
VGDTLNLNLR	55.66	1113.61	10	4.3	557.817	2	19.1987	12900000	104000000	4082	20210614_HS_50ng_RAW-8.raw	15				FALSE
VGEYSLYIGR	61.82	1155.59	10	3.3	578.805	2	18.9938	3620000	27800000	4019	20210614_HS_50ng_RAW-15.raw	15	P02743|SAMP_HUMAN			FALSE
VGFYESDVM(+15.99)GR	39.87	1274.56	11	-0.2	638.287	2	14.6205	3980000	8780000	2743	20210614_HS_50ng_RAW-6.raw	9	P01023|A2MG_HUMAN	Oxidation (M)		FALSE
VGFYESDVMGR	57.47	1258.57	11	2.3	630.29	2	18.7233	14300000	69700000	3877	20210614_HS_50ng_RAW-2.raw	17	P01023|A2MG_HUMAN			FALSE
VGYVSGWGQSDNFK	66.88	1542.71	14	-0.9	772.362	2	19.6302	1170000	14800000	4205	20210614_HS_50ng_RAW-6.raw	15				FALSE
VGYVSGWGR	64.09	979.487	9	-3.9	490.749	2	14.2499	58400000	311000000	3068	20210614_HS_50ng_RAW-1.raw	76	P00738|HPT_HUMAN;J3QLC9|J3QLC9_HUMAN;H3BS21|H3BS21_HUMAN;A0A087WU08|A0A087WU08_HUMAN;H0Y300|H0Y300_HUMAN;A0A0C4DGL8|A0A0C4DGL8_HUMAN;J3QR68|J3QR68_HUMAN			FALSE
VHQYFNVELIQPGAVK	78.76	1840.98	16	0.4	614.669	3	23.517	8030000	63600000	5476	20210614_HS_50ng_RAW-5.raw	20	P01024|CO3_HUMAN;M0QYC8|M0QYC8_HUMAN			FALSE
VHTEC(+57.02)C(+57.02)HGDLLEC(+57.02)ADDR	110.98	2085.83	17	-7	696.279	3	14.1159	276000000	1860000000	2688	20210614_HS_50ng_RAW-8.raw	432	A0A0C4DGB6|A0A0C4DGB6_HUMAN;P02768|ALBU_HUMAN;C9JKR2|C9JKR2_HUMAN;D6RHD5|D6RHD5_HUMAN;B7WNR0|B7WNR0_HUMAN;H0YA55|H0YA55_HUMAN	Carbamidomethylation; Carbamidomethylation; Carbamidomethylation	C5:Carbamidomethylation:1000.00;C6:Carbamidomethylation:1000.00;C13:Carbamidomethylation:1000.00	FALSE
VHTEC(+57.02)C(+57.02)HGDLLEC(+57.02)ADDRADLAK	97.53	2584.11	22	2.9	862.38	3	17.5427	90000000	685000000	3609	20210614_HS_50ng_RAW-5.raw	65	A0A0C4DGB6|A0A0C4DGB6_HUMAN;P02768|ALBU_HUMAN;C9JKR2|C9JKR2_HUMAN;D6RHD5|D6RHD5_HUMAN;B7WNR0|B7WNR0_HUMAN;H0YA55|H0YA55_HUMAN	Carbamidomethylation; Carbamidomethylation; Carbamidomethylation	C5:Carbamidomethylation:1000.00;C6:Carbamidomethylation:1000.00;C13:Carbamidomethylation:1000.00	FALSE
VIGNMGQTMEQLTPELK	66.29	1887.94	17	2.3	944.981	2	23.3215	1760000	17700000	5441	20210614_HS_50ng_RAW-4.raw	16	A8MUN2|A8MUN2_HUMAN;P04114|APOB_HUMAN			FALSE
VILGAHQEVNLEPHVQEIEVSR	42.58	2495.31	22	0.9	624.836	4	21.9113	320000	4410000	5019	20210614_HS_50ng_RAW-4.raw	4	P00747|PLMN_HUMAN			FALSE
VIPAC(+57.02)LPSPNYVVADR	42.22	1769.91	16	0.7	885.965	2	22.011	1010000	12400000	5376	20210614_HS_50ng_RAW-1.raw	14	P00747|PLMN_HUMAN	Carbamidomethylation	C5:Carbamidomethylation:1000.00	FALSE
VKDLATVYVDVLK	54.03	1461.84	13	-1.6	488.288	3	22.8341	507000	6070000	5238	20210614_HS_50ng_RAW-6.raw	8	P02647|APOA1_HUMAN			FALSE
VLDELTLAR	38	1028.59	9	-0.4	515.3	2	18.7349	68700	772000	4068	20210614_HS_50ng_RAW-11.raw	4				FALSE
VLDELTLTK	43.07	1030.59	9	2.8	516.304	2	18.1233	233000	1070000	3730	20210614_HS_50ng_RAW-6.raw	14	#CONTAM#cont|000133|;#CONTAM#cont|000131|;P13645|K1C10_HUMAN;#CONTAM#cont|000129|;#CONTAM#cont|000136|;#CONTAM#cont|000122|;#CONTAM#cont|000130|			FALSE
VLGAFSDGLAHLDNLK	56.98	1668.88	16	6.4	557.304	3	24.4916	212000	1750000	5382	20210614_HS_50ng_RAW-2.raw	2	F8W6P5|F8W6P5_HUMAN;E9PFT6|E9PFT6_HUMAN;P02042|HBD_HUMAN;P68871|HBB_HUMAN;A0A2R8Y7R2|A0A2R8Y7R2_HUMAN;E9PEW8|E9PEW8_HUMAN			FALSE
VLLDGVQNPR	59.21	1109.62	10	-0.3	555.817	2	12.9517	33800000	200000000	2757	20210614_HS_50ng_RAW-1.raw	65	P01024|CO3_HUMAN			FALSE
VLSLAQEQVGGSPEK	75.75	1540.81	15	1	771.413	2	16.8441	11500000	93400000	3415	20210614_HS_50ng_RAW-4.raw	17				FALSE
VM(+15.99)PIC(+57.02)LPSK	56.88	1059.55	9	1.1	530.781	2	18.2727	22800000	62500000	3797	20210614_HS_50ng_RAW-3.raw	57	P00738|HPT_HUMAN;J3QLC9|J3QLC9_HUMAN;H3BS21|H3BS21_HUMAN;A0A087WU08|A0A087WU08_HUMAN;H0Y300|H0Y300_HUMAN;A0A0C4DGL8|A0A0C4DGL8_HUMAN;J3QR68|J3QR68_HUMAN	Oxidation (M); Carbamidomethylation	C5:Carbamidomethylation:1000.00	FALSE
VMPIC(+57.02)LPSK	62.9	1043.55	9	-1	522.782	2	18.8824	19500000	148000000	4302	20210614_HS_50ng_RAW-1.raw	15	P00738|HPT_HUMAN;J3QLC9|J3QLC9_HUMAN;H3BS21|H3BS21_HUMAN;A0A087WU08|A0A087WU08_HUMAN;H0Y300|H0Y300_HUMAN;A0A0C4DGL8|A0A0C4DGL8_HUMAN;J3QR68|J3QR68_HUMAN	Carbamidomethylation	C5:Carbamidomethylation:1000.00	FALSE
VMPIC(+57.02)LPSKDYAEVGR	57.49	1833.91	16	0.4	612.311	3	21.5041	2400000	26400000	4809	20210614_HS_50ng_RAW-3.raw	11	P00738|HPT_HUMAN;J3QLC9|J3QLC9_HUMAN;H3BS21|H3BS21_HUMAN;A0A087WU08|A0A087WU08_HUMAN;H0Y300|H0Y300_HUMAN;A0A0C4DGL8|A0A0C4DGL8_HUMAN;J3QR68|J3QR68_HUMAN	Carbamidomethylation	C5:Carbamidomethylation:1000.00	FALSE
VNQNLVYESGSLNFSK	52.05	1797.89	16	1.9	899.954	2	20.5913	554000	7190000	4517	20210614_HS_50ng_RAW-6.raw	12	P04114|APOB_HUMAN			FALSE
VNVDEVGGEALGR	62.96	1313.66	13	-3.3	657.834	2	16.5736	5230000	40500000	3277	20210614_HS_50ng_RAW-3.raw	15	F8W6P5|F8W6P5_HUMAN;P68871|HBB_HUMAN;A0A2R8Y7R2|A0A2R8Y7R2_HUMAN			FALSE
VPAPPSPQPATYTC(+57.02)VVSHEDSR	67.37	2394.13	22	3.8	799.053	3	18.6908	512000	8810000	3966	20210614_HS_50ng_RAW-5.raw	14	A0A0A0MS09|A0A0A0MS09_HUMAN;P01880|IGHD_HUMAN	Carbamidomethylation	C14:Carbamidomethylation:1000.00	FALSE
VPFDAATLHTSTAMAAQHGMDDDGTGQK	39.66	2872.28	28	2.1	719.078	4	19.9151	637000	8800000	4501	20210614_HS_50ng_RAW-13.raw	11	A0A0A0MS51|A0A0A0MS51_HUMAN;P06396|GELS_HUMAN;A0A0A0MT01|A0A0A0MT01_HUMAN			FALSE
VPGTSTSATLTGLTR	34.71	1460.78	15	0.7	731.399	2	17.6851	31800	534000	3782	20210614_HS_50ng_RAW-13.raw	2	P02751|FINC_HUMAN			FALSE
VPQ(+0.98)VSTPTLVEVSR	44.2	1511.82	14	7.4	756.923	2	20.6289	230000	4050000	4726	20210614_HS_50ng_RAW-10.raw	1	A0A0C4DGB6|A0A0C4DGB6_HUMAN;#CONTAM#cont|000097|;#CONTAM#cont|000035|;A0A087WWT3|A0A087WWT3_HUMAN;P02768|ALBU_HUMAN;#CONTAM#cont|000017|;C9JKR2|C9JKR2_HUMAN;D6RHD5|D6RHD5_HUMAN;B7WNR0|B7WNR0_HUMAN;H0YA55|H0YA55_HUMAN	Deamidation (NQ)		FALSE
VPQVSTPTLVE(+21.98)VSR	49.99	1532.82	14	-0.4	511.946	3	20.1408	23800000	243000000	4425	20210614_HS_50ng_RAW-4.raw	27	A0A0C4DGB6|A0A0C4DGB6_HUMAN;#CONTAM#cont|000097|;#CONTAM#cont|000035|;A0A087WWT3|A0A087WWT3_HUMAN;P02768|ALBU_HUMAN;#CONTAM#cont|000017|;C9JKR2|C9JKR2_HUMAN;D6RHD5|D6RHD5_HUMAN;B7WNR0|B7WNR0_HUMAN;H0YA55|H0YA55_HUMAN	Sodium adduct	E11:Sodium adduct:38.16	FALSE
VPQVSTPTLVEVSR	80.64	1510.84	14	-5.8	756.421	2	20.6962	176000000	1450000000	4575	20210614_HS_50ng_RAW-8.raw	218	A0A0C4DGB6|A0A0C4DGB6_HUMAN;#CONTAM#cont|000097|;#CONTAM#cont|000035|;A0A087WWT3|A0A087WWT3_HUMAN;P02768|ALBU_HUMAN;#CONTAM#cont|000017|;C9JKR2|C9JKR2_HUMAN;D6RHD5|D6RHD5_HUMAN;B7WNR0|B7WNR0_HUMAN;H0YA55|H0YA55_HUMAN			FALSE
VPTGGVEEGLLER	59.3	1354.71	13	2	678.363	2	18.4254	1830000	17900000	3816	20210614_HS_50ng_RAW-6.raw	15	A0A0A0MS09|A0A0A0MS09_HUMAN;P01880|IGHD_HUMAN			FALSE
VPVAVQGE(+21.98)DTVQSLTQGDGVAK	55.52	2219.1	22	2.8	740.709	3	20.9875	37100	487000	4514	20210614_HS_50ng_RAW-2.raw	1	P01024|CO3_HUMAN	Sodium adduct	E8:Sodium adduct:0.00	FALSE
VPVAVQGED(+21.98)TVQSLTQGDGVAK	75.43	2219.1	22	2.1	740.71	3	20.6405	2180000	30100000	4585	20210614_HS_50ng_RAW-5.raw	14	P01024|CO3_HUMAN	Sodium adduct	D9:Sodium adduct:12.28	FALSE
VPVAVQGEDTVQ(+0.98)SLTQGDGVAK	57.75	2198.11	22	9.2	733.716	3	20.9183	438000	4080000	4658	20210614_HS_50ng_RAW-8.raw	5	P01024|CO3_HUMAN	Deamidation (NQ)	Q12:Deamidation (NQ):17.24	FALSE
VPVAVQGEDTVQSLTQGDGVAK	79.98	2197.12	22	4.2	733.385	3	20.3104	11500000	118000000	4506	20210614_HS_50ng_RAW-4.raw	48	P01024|CO3_HUMAN			FALSE
VQALEEANNDLENK	53.55	1585.76	14	-1	793.886	2	14.7302	2710000	12000000	2827	20210614_HS_50ng_RAW-5.raw	14	P35527|K1C9_HUMAN			FALSE
VQEAHLTEDQIFYFPK	26.21	1963.97	16	-1.6	655.662	3	23.7934	51200	790000	5508	20210614_HS_50ng_RAW-6.raw	2	P07360|CO8G_HUMAN			FALSE
VQFELHYQEVK	49.44	1418.72	11	0.3	473.914	3	19.0168	2390000	25600000	4357	20210614_HS_50ng_RAW-1.raw	15	#CONTAM#cont|000108|;Q5T985|Q5T985_HUMAN;Q5T987|Q5T987_HUMAN;P19823|ITIH2_HUMAN			FALSE
VQPYLDDFQK	52.95	1251.61	10	-1.9	626.813	2	17.4905	41100000	209000000	3871	20210614_HS_50ng_RAW-1.raw	15	F8W696|F8W696_HUMAN;P02647|APOA1_HUMAN			FALSE
VQSTELC(+57.02)AGHLAGGTDSC(+57.02)QGDSGGPLVC(+57.02)FEK	32.37	3236.42	31	1.6	1079.81	3	21.8335	89900	1950000	5013	20210614_HS_50ng_RAW-9.raw	2	P00747|PLMN_HUMAN	Carbamidomethylation; Carbamidomethylation; Carbamidomethylation	C7:Carbamidomethylation:1000.00;C18:Carbamidomethylation:1000.00;C28:Carbamidomethylation:1000.00	FALSE
VSALLTPAEQTGTWK	69.74	1600.85	15	8.7	801.437	2	20.3399	4030000	44300000	4814	20210614_HS_50ng_RAW-1.raw	14	P04114|APOB_HUMAN			FALSE
VSEADSSNADWVTK	39.65	1507.68	14	-5.7	754.842	2	7.3751	200000	1000000	1542	20210614_HS_50ng_RAW-1.raw	1	E7ETN3|E7ETN3_HUMAN;P00751|CFAB_HUMAN;A0A0G2JH38|A0A0G2JH38_HUMAN;B4E1Z4|B4E1Z4_HUMAN			FALSE
VSFLSALEEYTK	69.8	1385.71	12	0	693.861	2	26.7063	16100000	138000000	6257	20210614_HS_50ng_RAW-5.raw	16	F8W696|F8W696_HUMAN;P02647|APOA1_HUMAN			FALSE
VSTAFVYTK	49.14	1014.54	9	2	508.278	2	14.1477	1390000	4790000	2692	20210614_HS_50ng_RAW-15.raw	12	P04114|APOB_HUMAN			FALSE
VSVFVPPR	70.72	899.523	8	-2.6	450.767	2	17.0473	8590000	35400000	3452	20210614_HS_50ng_RAW-4.raw	17	P01871|IGHM_HUMAN			FALSE
VSVQLEASPAFLAVPVEK	57.22	1883.04	18	0.2	942.528	2	25.7393	2230000	26600000	6109	20210614_HS_50ng_RAW-9.raw	27	P01023|A2MG_HUMAN			FALSE
VTAAPQSVC(+57.02)ALR	59.1	1271.67	12	-3	636.838	2	12.5768	22800000	154000000	2725	20210614_HS_50ng_RAW-1.raw	41	P01023|A2MG_HUMAN	Carbamidomethylation	C9:Carbamidomethylation:1000.00	FALSE
VTGEGC(+57.02)VYLQTSLK	70.95	1553.78	14	4.6	777.899	2	18.7997	2550000	18000000	3960	20210614_HS_50ng_RAW-8.raw	15	P01023|A2MG_HUMAN	Carbamidomethylation	C6:Carbamidomethylation:1000.00	FALSE
VTSIQDWVQK	58.56	1202.63	10	1.4	602.323	2	18.6289	76000000	688000000	3966	20210614_HS_50ng_RAW-4.raw	31	P00738|HPT_HUMAN;J3QLC9|J3QLC9_HUMAN;A0A087WU08|A0A087WU08_HUMAN;H0Y300|H0Y300_HUMAN;A0A0C4DGL8|A0A0C4DGL8_HUMAN;J3QR68|J3QR68_HUMAN			FALSE
VTTSQDMLSIMEK	66.02	1481.71	13	3.2	741.865	2	20.8796	4540000	42000000	4604	20210614_HS_50ng_RAW-15.raw	15	H9KV48|H9KV48_HUMAN;P05155|IC1_HUMAN;E9PGN7|E9PGN7_HUMAN			FALSE
VTTVASHTSDSDVPSGVTEVVVK	67.71	2313.17	23	-2.2	772.062	3	18.9505	12700000	124000000	3996	20210614_HS_50ng_RAW-3.raw	15	H0YAS8|H0YAS8_HUMAN;P10909|CLUS_HUMAN;H0YC35|H0YC35_HUMAN			FALSE
VTVLGQPK	40.03	840.507	8	-9.1	421.257	2	5.7946	471000	1320000	1139	20210614_HS_50ng_RAW-1.raw	16	A0A0B4J231|A0A0B4J231_HUMAN;B9A064|IGLL5_HUMAN			FALSE
VVAEGFDFAN(+0.98)GINISPDGK	52.97	1949.94	19	4.1	975.98	2	24.1165	244000	2870000	5822	20210614_HS_50ng_RAW-13.raw	5	P27169|PON1_HUMAN	Deamidation (NQ)	N10:Deamidation (NQ):5.08	FALSE
VVAEGFDFANGIN(+0.98)ISPDGK	48.81	1949.94	19	2.4	975.978	2	24.1512	109000	1090000	5712	20210614_HS_50ng_RAW-9.raw	2	P27169|PON1_HUMAN	Deamidation (NQ)	N13:Deamidation (NQ):0.00	FALSE
VVAQGVGIPEDSIFTMADR	38.36	2004	19	3	1003.01	2	25.1541	405000	4330000	5945	20210614_HS_50ng_RAW-4.raw	6	P02760|AMBP_HUMAN;S4R471|S4R471_HUMAN;S4R3Y4|S4R3Y4_HUMAN			FALSE
VVLHPNYSQVDIGLIK	73.34	1794	16	0.3	599.009	3	22.9068	4240000	41300000	5224	20210614_HS_50ng_RAW-15.raw	15	P00738|HPT_HUMAN;J3QLC9|J3QLC9_HUMAN;H3BS21|H3BS21_HUMAN;A0A087WU08|A0A087WU08_HUMAN;H0Y300|H0Y300_HUMAN;A0A0C4DGL8|A0A0C4DGL8_HUMAN;J3QR68|J3QR68_HUMAN			FALSE
VVNNSPQPQNVVFDVQIPK	71.87	2121.12	19	-0.5	708.048	3	23.6242	4110000	50600000	5422	20210614_HS_50ng_RAW-15.raw	28	Q5T985|Q5T985_HUMAN;Q5T987|Q5T987_HUMAN;P19823|ITIH2_HUMAN			FALSE
VVSVLTVLHQDWLN(+0.98)GK	65.75	1807.98	16	3.3	905.002	2	27.4662	14200000	104000000	6413	20210614_HS_50ng_RAW-5.raw	38	A0A4W9A917|A0A4W9A917_HUMAN;P01857|IGHG1_HUMAN;P01860|IGHG3_HUMAN;A0A0A0MS08|A0A0A0MS08_HUMAN;A0A286YES1|A0A286YES1_HUMAN	Deamidation (NQ)	N14:Deamidation (NQ):19.86	FALSE
VVSVLTVVHQDWLN(+0.98)GK	65.51	1793.97	16	1	598.997	3	25.9034	20300000	154000000	6084	20210614_HS_50ng_RAW-8.raw	47	P01859|IGHG2_HUMAN;A0A286YEY4|A0A286YEY4_HUMAN	Deamidation (NQ)	N14:Deamidation (NQ):33.81	FALSE
VVSVLTVVHQDWLNGK	70.52	1792.98	16	0.4	598.669	3	25.5617	1420000	14700000	6008	20210614_HS_50ng_RAW-5.raw	4	P01859|IGHG2_HUMAN;A0A286YEY4|A0A286YEY4_HUMAN			FALSE
VWVYPPEK	40.25	1016.53	8	-6.3	509.271	2	15.3127	61400000	78300000	3612	20210614_HS_50ng_RAW-8.raw	4	P02790|HEMO_HUMAN;Q9BS19|Q9BS19_HUMAN			FALSE
VYAC(+57.02)E(+21.98)VTHQGLSSPVTK	62.29	1896.9	17	-1.7	633.307	3	16.6621	918000	11800000	3318	20210614_HS_50ng_RAW-8.raw	13	A0A5H1ZRQ3|A0A5H1ZRQ3_HUMAN;P01834|IGKC_HUMAN	Carbamidomethylation; Sodium adduct	C4:Carbamidomethylation:1000.00;E5:Sodium adduct:63.99	FALSE
VYAC(+57.02)EVTHQ(+0.98)GLSSPVTK	37.37	1875.9	17	9.3	626.314	3	17.2365	422000	1570000	3548	20210614_HS_50ng_RAW-4.raw	2	A0A5H1ZRQ3|A0A5H1ZRQ3_HUMAN;P01834|IGKC_HUMAN	Carbamidomethylation; Deamidation (NQ)	C4:Carbamidomethylation:1000.00	FALSE
VYAC(+57.02)EVTHQGLSSPVTK	82.72	1874.92	17	-9.8	625.974	3	16.6613	81300000	643000000	3330	20210614_HS_50ng_RAW-5.raw	67	A0A5H1ZRQ3|A0A5H1ZRQ3_HUMAN;P01834|IGKC_HUMAN	Carbamidomethylation	C4:Carbamidomethylation:1000.00	FALSE
VYAYYNLEESC(+57.02)TR	68.9	1666.73	13	2.6	834.374	2	18.4904	4620000	34800000	3891	20210614_HS_50ng_RAW-5.raw	15	P01024|CO3_HUMAN	Carbamidomethylation	C11:Carbamidomethylation:1000.00	FALSE
VYDYYETDEFAIAEYNAPC(+57.02)SK	37.49	2547.08	21	5.2	850.038	3	23.1473	403000	2470000	5739	20210614_HS_50ng_RAW-1.raw	4	P01023|A2MG_HUMAN	Carbamidomethylation	C19:Carbamidomethylation:1000.00	FALSE
WEAEPVYVQR	45.93	1275.62	10	2.2	638.821	2	17.624	894000	8170000	3695	20210614_HS_50ng_RAW-11.raw	10	C9JEV0|C9JEV0_HUMAN;P25311|ZA2G_HUMAN			FALSE
WELC(+57.02)DIPR	52.15	1087.51	8	2.9	544.765	2	20.7785	752000	7270000	4631	20210614_HS_50ng_RAW-5.raw	14	P00747|PLMN_HUMAN	Carbamidomethylation	C4:Carbamidomethylation:1000.00	FALSE
WELLQQVDTSTR	63.64	1474.74	12	2.6	738.38	2	21.6315	4280000	44000000	4886	20210614_HS_50ng_RAW-5.raw	15	#CONTAM#cont|000132|;#CONTAM#cont|000135|;#CONTAM#cont|000134|;P04264|K2C1_HUMAN			FALSE
WEMPFDPQDTHQSR	61.09	1772.76	14	2.3	591.928	3	21.2881	2620000	16600000	4791	20210614_HS_50ng_RAW-5.raw	13	G3V595|G3V595_HUMAN;P01011|AACT_HUMAN			FALSE
WFYIASAFR	61.33	1159.58	9	5	580.801	2	25.771	983000	3440000	6090	20210614_HS_50ng_RAW-4.raw	13	P02763|A1AG1_HUMAN;P19652|A1AG2_HUMAN			FALSE
WLQGSQELPR	59.72	1212.63	10	1.8	607.321	2	18.1145	84100000	871000000	3785	20210614_HS_50ng_RAW-5.raw	62	P01876|IGHA1_HUMAN;A0A286YEY1|A0A286YEY1_HUMAN			FALSE
WNFYYSPQSSPDK	47.08	1617.71	13	0	809.862	2	20.7049	33700	378000	4943	20210614_HS_50ng_RAW-1.raw	1	P04114|APOB_HUMAN			FALSE
WQEEM(+15.99)ELYR	50.65	1298.56	9	-1.1	650.287	2	15.7358	8480000	36300000	3059	20210614_HS_50ng_RAW-8.raw	15	F8W696|F8W696_HUMAN;P02647|APOA1_HUMAN	Oxidation (M)		FALSE
WQQGNVFSC(+57.02)SVMHEALHNHYTQK	48.54	2800.26	23	-5.5	701.068	4	21.9416	234000	2660000	5045	20210614_HS_50ng_RAW-9.raw	8	P01859|IGHG2_HUMAN;P01857|IGHG1_HUMAN;A0A286YEY4|A0A286YEY4_HUMAN;A0A0A0MS08|A0A0A0MS08_HUMAN;A0A0A0MS07|A0A0A0MS07_HUMAN	Carbamidomethylation	C9:Carbamidomethylation:1000.00	FALSE
WQSIPLC(+57.02)VEK	61.04	1258.64	10	1.7	630.327	2	20.9218	1760000	18500000	4683	20210614_HS_50ng_RAW-4.raw	15	P08603|CFAH_HUMAN	Carbamidomethylation	C7:Carbamidomethylation:1000.00	FALSE
WSGQTAIC(+57.02)DN(+0.98)GAGYC(+57.02)SNPGIPIGTR	39.5	2652.17	25	6.3	885.069	3	21.4629			4945	20210614_HS_50ng_RAW-11.raw	3	E7ETN3|E7ETN3_HUMAN;P00751|CFAB_HUMAN;A0A0G2JH38|A0A0G2JH38_HUMAN;B4E1Z4|B4E1Z4_HUMAN	Carbamidomethylation; Deamidation (NQ); Carbamidomethylation	C8:Carbamidomethylation:1000.00;N10:Deamidation (NQ):0.00;C15:Carbamidomethylation:1000.00	FALSE
WSGQTAIC(+57.02)DNGAGYC(+57.02)SN(+0.98)PGIPIGTR	37.86	2652.17	25	4.7	885.068	3	21.4997			4921	20210614_HS_50ng_RAW-7.raw	3	E7ETN3|E7ETN3_HUMAN;P00751|CFAB_HUMAN;A0A0G2JH38|A0A0G2JH38_HUMAN;B4E1Z4|B4E1Z4_HUMAN	Carbamidomethylation; Carbamidomethylation; Deamidation (NQ)	C8:Carbamidomethylation:1000.00;C15:Carbamidomethylation:1000.00;N17:Deamidation (NQ):0.00	FALSE
WSSPPQC(+57.02)EGLPC(+57.02)K	61.29	1544.68	13	-0.2	773.345	2	16.5593	585000	6110000	3342	20210614_HS_50ng_RAW-4.raw	7	P08603|CFAH_HUMAN	Carbamidomethylation; Carbamidomethylation	C7:Carbamidomethylation:1000.00;C12:Carbamidomethylation:1000.00	FALSE
WYVDGVEVHNAK	55.65	1415.68	12	1.2	472.902	3	17.8921	3740000	23500000	3741	20210614_HS_50ng_RAW-8.raw	13	A0A4W9A917|A0A4W9A917_HUMAN;P01860|IGHG3_HUMAN;A0A286YES1|A0A286YES1_HUMAN			FALSE
YAASSYLSLTPEQWK	77.09	1742.85	15	1.8	872.435	2	23.9458	99500000	1040000000	5518	20210614_HS_50ng_RAW-15.raw	82	P0DOY2|IGLC2_HUMAN;A0A0B4J231|A0A0B4J231_HUMAN;P0DOY3|IGLC3_HUMAN;B9A064|IGLL5_HUMAN			FALSE
YAATSQVLLPSK	70.23	1276.7	12	-0.3	639.358	2	17.2946	21500000	140000000	3508	20210614_HS_50ng_RAW-5.raw	18	P01871|IGHM_HUMAN			FALSE
YDVENC(+57.02)LANK	48.56	1224.54	10	0.5	613.278	2	11.6559	1870000	4570000	2241	20210614_HS_50ng_RAW-2.raw	12	P01023|A2MG_HUMAN	Carbamidomethylation	C6:Carbamidomethylation:1000.00	FALSE
YEELQITAGR	49.08	1178.59	10	0.6	590.304	2	16.0239	7220000	28100000	3166	20210614_HS_50ng_RAW-4.raw	25	#CONTAM#cont|000132|;#CONTAM#cont|000135|;#CONTAM#cont|000134|;P04264|K2C1_HUMAN			FALSE
YEITTIHNLFR	52.5	1405.74	11	0.6	469.586	3	22.6983	1070000	10100000	5216	20210614_HS_50ng_RAW-8.raw	14	P05546|HEP2_HUMAN			FALSE
YENYELTLK	62.28	1171.58	9	3.9	586.796	2	18.3049	3340000	27800000	3771	20210614_HS_50ng_RAW-2.raw	14	P04114|APOB_HUMAN			FALSE
YEVDQQIQVLM(+15.99)DK	65.37	1623.78	13	-2.4	812.896	2	19.5341	645000	8310000	4247	20210614_HS_50ng_RAW-5.raw	14	P04114|APOB_HUMAN	Oxidation (M)		FALSE
YFIDFVAR	61.87	1029.53	8	1.7	515.772	2	22.7311	4380000	21300000	5186	20210614_HS_50ng_RAW-6.raw	15	P01042|KNG1_HUMAN			FALSE
YGAATFTR	42.59	885.434	8	-1.7	443.724	2	6.5023	34100	573000	1179	20210614_HS_50ng_RAW-15.raw	8	P01023|A2MG_HUMAN;P20742|PZP_HUMAN			FALSE
YGLVTYATYPK	68.27	1274.65	11	0.2	638.335	2	19.4993	4250000	36100000	4208	20210614_HS_50ng_RAW-5.raw	12	E7ETN3|E7ETN3_HUMAN;P00751|CFAB_HUMAN;A0A0G2JH38|A0A0G2JH38_HUMAN;B4E1Z4|B4E1Z4_HUMAN			FALSE
YGM(+15.99)VAQVTQTLK	70.32	1353.7	12	-2	677.854	2	16.3846	2160000	12200000	3207	20210614_HS_50ng_RAW-8.raw	15	A8MUN2|A8MUN2_HUMAN;P04114|APOB_HUMAN	Oxidation (M)		FALSE
YGQ(+0.98)TIRPIC(+57.02)LPC(+57.02)TEGTTR	36.52	2123.01	18	3.3	708.681	3	20.0429			4717	20210614_HS_50ng_RAW-1.raw	1	H7C5H1|H7C5H1_HUMAN;E7ETN3|E7ETN3_HUMAN;P00751|CFAB_HUMAN;B4E1Z4|B4E1Z4_HUMAN	Deamidation (NQ); Carbamidomethylation; Carbamidomethylation	C9:Carbamidomethylation:1000.00;C12:Carbamidomethylation:1000.00	FALSE
YGQTIRPIC(+57.02)LPC(+57.02)TEGTTR	65.08	2122.03	18	1	708.351	3	20.2983	554000	10400000	4443	20210614_HS_50ng_RAW-3.raw	16	H7C5H1|H7C5H1_HUMAN;E7ETN3|E7ETN3_HUMAN;P00751|CFAB_HUMAN;B4E1Z4|B4E1Z4_HUMAN	Carbamidomethylation; Carbamidomethylation	C9:Carbamidomethylation:1000.00;C12:Carbamidomethylation:1000.00	FALSE
YIC(+57.02)E(+21.98)NQDSISSK	37.74	1464.62	12	-6.9	733.311	2	6.5456	131000	2360000	1199	20210614_HS_50ng_RAW-6.raw	7	A0A0C4DGB6|A0A0C4DGB6_HUMAN;P02768|ALBU_HUMAN;C9JKR2|C9JKR2_HUMAN;D6RHD5|D6RHD5_HUMAN;B7WNR0|B7WNR0_HUMAN;H0YA55|H0YA55_HUMAN	Carbamidomethylation; Sodium adduct	C3:Carbamidomethylation:1000.00;E4:Sodium adduct:0.00	FALSE
YIC(+57.02)EN(+0.98)QDSISSK	60.38	1443.62	12	8.9	722.823	2	12.4225	36400000	111000000	2634	20210614_HS_50ng_RAW-1.raw	51	A0A0C4DGB6|A0A0C4DGB6_HUMAN;P02768|ALBU_HUMAN;C9JKR2|C9JKR2_HUMAN;D6RHD5|D6RHD5_HUMAN;B7WNR0|B7WNR0_HUMAN;H0YA55|H0YA55_HUMAN	Carbamidomethylation; Deamidation (NQ)	C3:Carbamidomethylation:1000.00;N5:Deamidation (NQ):12.28	FALSE
YIC(+57.02)ENQ(+0.98)DSISSK	52.21	1443.62	12	7.3	722.822	2	14.1354	423000	1870000	2680	20210614_HS_50ng_RAW-6.raw	4	A0A0C4DGB6|A0A0C4DGB6_HUMAN;P02768|ALBU_HUMAN;C9JKR2|C9JKR2_HUMAN;D6RHD5|D6RHD5_HUMAN;B7WNR0|B7WNR0_HUMAN;H0YA55|H0YA55_HUMAN	Carbamidomethylation; Deamidation (NQ)	C3:Carbamidomethylation:1000.00;Q6:Deamidation (NQ):0.00	FALSE
YIC(+57.02)ENQD(+21.98)SISSK	57.04	1464.62	12	-3.6	733.313	2	5.8719	12700000	59000000	1017	20210614_HS_50ng_RAW-15.raw	45	A0A0C4DGB6|A0A0C4DGB6_HUMAN;P02768|ALBU_HUMAN;C9JKR2|C9JKR2_HUMAN;D6RHD5|D6RHD5_HUMAN;B7WNR0|B7WNR0_HUMAN;H0YA55|H0YA55_HUMAN	Carbamidomethylation; Sodium adduct	C3:Carbamidomethylation:1000.00;D7:Sodium adduct:29.32	FALSE
YIC(+57.02)ENQDSISSK	65.72	1442.63	12	-5.3	722.321	2	12.2301	112000000	355000000	2335	20210614_HS_50ng_RAW-8.raw	354	A0A0C4DGB6|A0A0C4DGB6_HUMAN;P02768|ALBU_HUMAN;C9JKR2|C9JKR2_HUMAN;D6RHD5|D6RHD5_HUMAN;B7WNR0|B7WNR0_HUMAN;H0YA55|H0YA55_HUMAN	Carbamidomethylation	C3:Carbamidomethylation:1000.00	FALSE
YIYGKPVQGVAYVR	37.74	1611.88	14	1.1	538.3	3	18.6219	158000	1960000	4033	20210614_HS_50ng_RAW-11.raw	2				FALSE
YLGEEYVK	52.41	999.491	8	-2.9	500.752	2	12.3268	91700000	442000000	2693	20210614_HS_50ng_RAW-1.raw	62	P02787|TRFE_HUMAN			FALSE
YLTWASR	52.52	895.455	7	-2.8	448.734	2	15.2832	20700000	103000000	3069	20210614_HS_50ng_RAW-3.raw	57	P01876|IGHA1_HUMAN;A0A286YEY1|A0A286YEY1_HUMAN			FALSE
YLYEIAR	55.03	926.486	7	-1.9	464.25	2	17.6273	760000000	4470000000	3850	20210614_HS_50ng_RAW-1.raw	342	A0A0C4DGB6|A0A0C4DGB6_HUMAN;#CONTAM#cont|000097|;#CONTAM#cont|000035|;P02768|ALBU_HUMAN;H7C013|H7C013_HUMAN;#CONTAM#cont|000017|;H0YA55|H0YA55_HUMAN			FALSE
YNSQNQSNNQFVLYR	69.3	1873.87	15	0.9	937.943	2	18.4559	1490000	11800000	3903	20210614_HS_50ng_RAW-4.raw	14	P01042|KNG1_HUMAN			FALSE
YPLYVLK	34.82	894.521	7	-1.3	448.267	2	19.7002	5680	109000	4333	20210614_HS_50ng_RAW-9.raw	1				FALSE
YSLTYIYTGLSK	65.1	1407.73	12	1.1	704.872	2	23.1325	866000	9150000	5312	20210614_HS_50ng_RAW-6.raw	14	C9JEV0|C9JEV0_HUMAN;P25311|ZA2G_HUMAN			FALSE
YSPSFQGQVTISADK	61.58	1626.79	15	2.1	814.403	2	18.4817	758000	8360000	3899	20210614_HS_50ng_RAW-5.raw	13	A0A0C4DH38|HV551_HUMAN			FALSE
YTC(+57.02)LPGYVR	53.53	1127.54	9	-0.5	564.779	2	16.6667	2360000	14000000	3312	20210614_HS_50ng_RAW-3.raw	14	P04003|C4BPA_HUMAN	Carbamidomethylation	C3:Carbamidomethylation:1000.00	FALSE
YTFELSR	47.08	914.45	7	-2	458.231	2	17.1587	5490000	29400000	3427	20210614_HS_50ng_RAW-3.raw	14	P02774|VTDB_HUMAN;D6RF35|D6RF35_HUMAN			FALSE
YTYNYEAESSSGVPGTADSR	55.44	2152.92	20	-2.9	1077.46	2	16.6388	292000	3830000	3362	20210614_HS_50ng_RAW-4.raw	7	A8MUN2|A8MUN2_HUMAN;A0A669KB70|A0A669KB70_HUMAN;P04114|APOB_HUMAN			FALSE
YVGGQEHFAHLLILR	60.46	1751.95	15	3.3	584.992	3	23.2789	1130000	8300000	5387	20210614_HS_50ng_RAW-8.raw	17	P02763|A1AG1_HUMAN			FALSE
YVLPNFEVK	59.96	1107.6	9	4.2	554.808	2	21.8285	9500000	78000000	4894	20210614_HS_50ng_RAW-15.raw	15				FALSE
YVM(+15.99)LPVADQDQC(+57.02)IR	77.35	1722.81	14	1.1	862.412	2	19.5438	37300000	98300000	4242	20210614_HS_50ng_RAW-5.raw	49	P00738|HPT_HUMAN;J3QLC9|J3QLC9_HUMAN;H3BS21|H3BS21_HUMAN;A0A087WU08|A0A087WU08_HUMAN;H0Y300|H0Y300_HUMAN;A0A0C4DGL8|A0A0C4DGL8_HUMAN;J3QR68|J3QR68_HUMAN	Oxidation (M); Carbamidomethylation	C12:Carbamidomethylation:1000.00	FALSE
YVMLPVADQDQC(+57.02)IR	72.92	1706.81	14	1	569.945	3	20.9254	63700000	465000000	4994	20210614_HS_50ng_RAW-1.raw	69	P00738|HPT_HUMAN;J3QLC9|J3QLC9_HUMAN;H3BS21|H3BS21_HUMAN;A0A087WU08|A0A087WU08_HUMAN;H0Y300|H0Y300_HUMAN;A0A0C4DGL8|A0A0C4DGL8_HUMAN;J3QR68|J3QR68_HUMAN	Carbamidomethylation	C12:Carbamidomethylation:1000.00	FALSE
YVTSAPM(+15.99)PEPQAPGR	49.73	1615.77	15	-1.6	808.889	2	16.1401	2480000	10300000	3202	20210614_HS_50ng_RAW-8.raw	32	P01871|IGHM_HUMAN	Oxidation (M)		FALSE
YVTSAPMPEPQAPGR	56.65	1599.77	15	2.3	800.895	2	17.0506	9640000	72500000	3406	20210614_HS_50ng_RAW-8.raw	24	P01871|IGHM_HUMAN			FALSE
YVYIAELLAHK	51.24	1318.73	11	1	440.584	3	24.0991	217000	2190000	5699	20210614_HS_50ng_RAW-9.raw	6	P27169|PON1_HUMAN			FALSE
YWGVASFLQK	58.68	1197.62	10	3.5	599.818	2	24.3625	3850000	25300000	5710	20210614_HS_50ng_RAW-5.raw	15				FALSE
YYC(+57.02)FQGNQFLR	64.61	1494.67	11	3.1	748.345	2	21.5253	4300000	28000000	4863	20210614_HS_50ng_RAW-5.raw	12	P02790|HEMO_HUMAN;Q9BS19|Q9BS19_HUMAN	Carbamidomethylation	C3:Carbamidomethylation:1000.00	FALSE
YYTYLIM(+15.99)NK	34.3	1223.59	9	3.6	612.804	2	18.1103	87800	790000	3825	20210614_HS_50ng_RAW-12.raw	2	P01024|CO3_HUMAN	Oxidation (M)		FALSE
YYTYLIMNK	60.61	1207.59	9	4	604.807	2	20.434	6700000	44800000	4477	20210614_HS_50ng_RAW-3.raw	15	P01024|CO3_HUMAN			FALSE
